# Supplementary material for: Synthesis and Demonstration of the Biological Relevance of sp3‐rich Scaffolds Distantly Related to Natural Product Frameworks
Source: PubMed Central journal article supplement (PMC5703167; doi:10.1002/chem.201704169), 2017-10-06
Supplement: CHEM-23-15227-s001.pdf [file CHEM-23-15227-s001.pdf]

# CHEMISTRY

## A **European** Journal

### Supporting Information

#### **Synthesis and Demonstration of the Biological Relevance of $sp^3$ -rich Scaffolds Distantly Related to Natural Product Frameworks**

Daniel J. Foley,<sup>[a, b]</sup> Philip G. E. Craven,<sup>[a, b]</sup> Patrick M. Collins,<sup>[c]</sup> Richard G. Doveston,<sup>[a, b]</sup>  
Anthony Aimon,<sup>[a, b]</sup> Romain Talon,<sup>[d]</sup> Ian Churcher,<sup>[e]</sup> Frank von Delft,<sup>\*,[c, d]</sup>  
Stephen P. Marsden,<sup>\*,[b]</sup> and Adam Nelson<sup>\*,[a, b]</sup>

chem\_201704169\_sm\_miscellaneous\_information.pdf

# Synthesis and Demonstration of the Biological Relevance of sp<sup>3</sup>-rich Scaffolds Distantly Related to Natural Product Frameworks

*Dr Daniel J. Foley, Dr Philip G. E. Craven, Dr Patrick Collins,  
Dr Richard G. Doveston, Dr Anthony Aimon, Dr Romain Talon, Prof. Ian Churcher,  
Prof. Frank von Delft\*, Prof. Stephen P Marsden\*, Prof. Adam Nelson\**

## Supplementary Information

### Contents:

|            |                                                                                       |           |
|------------|---------------------------------------------------------------------------------------|-----------|
| <b>1.0</b> | <b>Compound indices</b>                                                               | <b>4</b>  |
| 1.1        | By Fragment                                                                           | 4         |
| 1.2        | By Scaffold                                                                           | 11        |
| 1.3        | By Framework                                                                          | 15        |
| <b>2.0</b> | <b>Supplementary Figures</b>                                                          | <b>17</b> |
| <b>3.0</b> | <b>Supplementary Tables</b>                                                           | <b>24</b> |
| <b>4.0</b> | <b>Computational analysis of fragments and scaffolds</b>                              | <b>39</b> |
| 4.1        | Molecular properties and natural product-likeness scores of the fragments             | 40        |
| 4.2        | Natural product-likeness scores of the deprotected scaffolds                          | 46        |
| 4.3        | Summary of natural product-likeness scores of the fragments and scaffolds             | 49        |
| 4.4        | Natural product-likeness scores of commercial libraries                               | 49        |
| <b>5.0</b> | <b>Experimental</b>                                                                   | <b>52</b> |
| 5.1        | General experimental                                                                  | 52        |
| 5.2        | General procedures                                                                    | 53        |
| 5.3        | A note on NMR assignments                                                             | 55        |
| 5.4        | Compound data                                                                         | 56        |
| 5.4.1      | Preparation of cycloaddition precursors and cycloadducts                              | 56        |
| 5.4.1.1    | Preparation of each intermediate in the synthesis of <i>O</i> -bridged cycloadduct 2a | 56        |
| 5.4.1.2    | Telescoped synthesis of <i>O</i> -bridged cycloadducts 2a-b                           | 59        |
| 5.4.1.3    | Preparation of <i>O</i> -bridged cycloadducts 2a and 2b                               | 61        |
| 5.4.1.4    | Preparation of <i>O</i> -bridged cycloadduct 2c                                       | 63        |
| 5.4.1.5    | Preparation of precursors to <i>N</i> -bridged cycloadducts 2d-g                      | 65        |
| 5.4.1.6    | Preparation of the <i>N</i> -bridged cycloadducts 2d-g                                | 67        |
| 5.4.2      | Preparation of scaffolds                                                              | 70        |
| 5.4.2.1    | Scaffolds derived from cycloadduct 2a                                                 | 70        |
| 5.4.2.1.1  | Preparation of cyclic amine 4, and diols 7 and S13                                    | 71        |
| 5.4.2.1.2  | Preparation of imidazole scaffolds 5 and S16                                          | 74        |

|           |                                                                               |     |
|-----------|-------------------------------------------------------------------------------|-----|
| 5.4.2.1.3 | Preparation of silyl-protected amino alcohol scaffold 6.....                  | 76  |
| 5.4.2.1.4 | Preparation of oxazolidinone scaffold 8.....                                  | 79  |
| 5.4.2.1.5 | Preparation of pyrazine scaffold 9.....                                       | 81  |
| 5.4.2.1.6 | Preparation of piperazine scaffolds S19-S20.....                              | 82  |
| 5.4.2.1.7 | Preparation of quinoxaline scaffold S21.....                                  | 84  |
| 5.4.2.2   | Scaffolds derived from cycloadduct 2b.....                                    | 85  |
| 5.4.2.2.1 | Preparation of spirocyclic scaffold 3 and scaffold 12.....                    | 85  |
| 5.4.2.2.2 | Preparation of quinoxaline scaffold 10.....                                   | 90  |
| 5.4.2.2.3 | Preparation of imidazole scaffold 11.....                                     | 91  |
| 5.4.2.3   | Scaffolds derived from cycloadduct 2c.....                                    | 92  |
| 5.4.2.3.1 | Preparation of silyl-protected amino alcohol scaffold 13 and alcohol S24..... | 93  |
| 5.4.2.3.2 | Preparation of quinoxaline scaffold 14.....                                   | 96  |
| 5.4.2.3.3 | Preparation of diol S25 and cyclic amine 15.....                              | 97  |
| 5.4.2.3.4 | Preparation of oxazolidinone scaffold 16.....                                 | 99  |
| 5.4.2.4   | Scaffolds derived from cycloadduct 2d.....                                    | 101 |
| 5.4.2.4.1 | Preparation of scaffold 17.....                                               | 101 |
| 5.4.2.4.2 | Preparation of scaffold S27.....                                              | 102 |
| 5.4.2.5   | Scaffold derived from cycloadduct 2e.....                                     | 103 |
| 5.4.2.5.1 | Preparation of scaffold 19.....                                               | 103 |
| 5.4.2.6   | Scaffolds derived from cycloadduct 2f.....                                    | 105 |
| 5.4.2.6.1 | Preparation of scaffold 18.....                                               | 106 |
| 5.4.2.6.2 | Preparation of scaffolds 20 and S32-S34.....                                  | 107 |
| 5.4.2.6.3 | Preparation of scaffold S35.....                                              | 113 |
| 5.4.3     | Preparation of fragments.....                                                 | 114 |
| 5.4.3.1   | Preparation of fragments derived from cycloadduct 2g.....                     | 120 |
| 5.4.3.2   | Preparation of fragments derived from scaffold 3.....                         | 123 |
| 5.4.3.3   | Preparation of fragments derived from scaffold 7.....                         | 124 |
| 5.4.3.4   | Preparation of fragments derived from scaffold 8.....                         | 131 |
| 5.4.3.5   | Preparation of fragments derived from scaffold 9.....                         | 134 |
| 5.4.3.6   | Preparation of fragments derived from scaffold 13.....                        | 136 |
| 5.4.3.7   | Preparation of fragments derived from scaffold 14.....                        | 140 |
| 5.4.3.8   | Preparation of fragments derived from scaffold 15.....                        | 141 |
| 5.4.3.9   | Preparation of fragments derived from scaffold 16.....                        | 144 |
| 5.4.3.10  | Preparation of fragments derived from scaffold 17.....                        | 145 |
| 5.4.3.11  | Preparation of fragment derived from scaffold 18.....                         | 147 |
| 5.4.3.12  | Preparation of a fragment derived from scaffold 19.....                       | 147 |
| 5.4.3.13  | Preparation of fragments derived from scaffold 20.....                        | 148 |

|            |                                                                  |            |
|------------|------------------------------------------------------------------|------------|
| 5.4.3.14   | Preparation of fragments derived from scaffold S16 .....         | 149        |
| 5.4.3.15   | Preparation of a fragment derived from scaffold S19 .....        | 153        |
| 5.4.3.16   | Preparation of a fragment derived from scaffold S20 .....        | 155        |
| 5.4.3.17   | Preparation of a fragment derived from scaffold S21 .....        | 156        |
| 5.4.3.18   | Preparation of fragments derived from scaffold S24 .....         | 157        |
| 5.4.3.19   | Preparation of fragments derived from scaffold S25 .....         | 160        |
| 5.4.3.20   | Preparation of fragments derived from scaffold S27 .....         | 168        |
| 5.4.3.21   | Preparation of fragments derived from scaffold S32 .....         | 171        |
| 5.4.3.22   | Preparation of fragments derived from scaffold S33 and S34 ..... | 171        |
| <b>6.0</b> | <b>High-throughput protein crystallography.....</b>              | <b>173</b> |
| <b>7.0</b> | <b>Processed NMR spectra .....</b>                               | <b>174</b> |
| <b>8.0</b> | <b>References .....</b>                                          | <b>428</b> |



## 1.0 Compound indices

### 1.1 By Fragment

Note that the following fragments from the manuscript are detailed throughout the Supporting Information using the aliases given below in parentheses:

- Compound **12** (F12)
- Compound **21** (F8)
- Compound **22** (F31)
- Compound **23** (F48)
- Compound **24** (CF1)
- Compound **25** (F32)

| Entry | Fragment                                                                                         | Based on framework | Derivative of scaffold ## | Synthetically derived from... |
|-------|--------------------------------------------------------------------------------------------------|--------------------|---------------------------|-------------------------------|
| 1     | 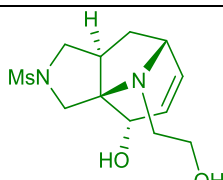<br><b>F1</b>  | fw-22              | S35                       | 2g → S36 → <b>F1</b>          |
| 2     | <br><b>F2</b> | fw-22              | S35                       | 2g → S36 → <b>F2</b>          |
| 3     | <br><b>F3</b> | fw-22              | S35                       | 2g → S37 → <b>F3</b>          |
| 4     | <br><b>F4</b> | fw-1               | 3                         | 3 → <b>F4</b>                 |
| 5     | <br><b>F5</b> | fw-6               | 8                         | 8 → <b>F5</b>                 |

| Entry | Fragment                                                                                               | Based on framework | Derivative of scaffold ## | Synthetically derived from... |
|-------|--------------------------------------------------------------------------------------------------------|--------------------|---------------------------|-------------------------------|
|       | <b>F5</b>                                                                                              |                    |                           |                               |
| 6     | 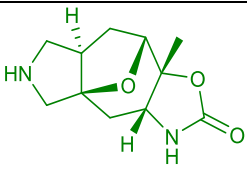<br><b>F6</b>         | fw-6               | 8                         | F5 → F6                       |
| 7     | <br><b>F7</b>         | fw-6               | 8                         | F6 → F7                       |
| 8     | <br><b>F8 ≡ 21</b>    | fw-6               | 8                         | F6 → F8                       |
| 9     | <br><b>F9</b>        | fw-6               | 8                         | F6 → F9                       |
| 10    | <br><b>F10</b>      | fw-7               | 9                         | 9 → F10                       |
| 11    | <br><b>F11</b>      | fw-7               | 9                         | 9 → F11                       |
| 12    | <br><b>F12 ≡ 12</b> | fw-10              | 12                        | 2b → S22 → F12                |
| 13    | <br><b>F13</b>      | fw-4               | 13                        | 13 → S38 → F13                |
| 14    | <br><b>F14</b>      | fw-4               | 13                        | 13 → S39 → F14                |

| Entry | Fragment                                                                                              | Based on framework | Derivative of scaffold ## | Synthetically derived from... |
|-------|-------------------------------------------------------------------------------------------------------|--------------------|---------------------------|-------------------------------|
| 15    | 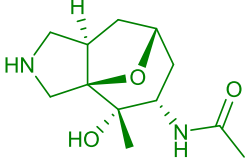 <p><b>F15</b></p>   | fw-4               | 13                        | 13 → S40 → F15                |
| 16    |  <p><b>F16</b></p>   | fw-11              | 14                        | 14 → F16                      |
| 17    |  <p><b>F17</b></p>   | fw-12              | 15                        | 15 → S41 → S42 → F17          |
| 18    |  <p><b>F18</b></p>  | fw-12              | 15                        | S25 → S43 → F18               |
| 19    |  <p><b>F19</b></p> | fw-13              | 16                        | 16 → F19                      |
| 20    |  <p><b>F20</b></p> | fw-14              | 17                        | 17 → F20                      |
| 21    |  <p><b>F21</b></p> | fw-14              | 17                        | F20 → F21                     |
| 22    |  <p><b>F22</b></p> | fw-14              | 17                        | F20 → F22                     |

| Entry | Fragment                                                                                          | Based on framework | Derivative of scaffold ## | Synthetically derived from...   |
|-------|---------------------------------------------------------------------------------------------------|--------------------|---------------------------|---------------------------------|
| 23    | 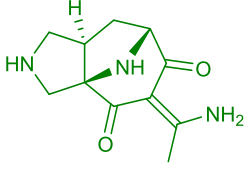<br><b>F23</b>   | fw-15              | 18                        | 18 → F23                        |
| 24    | <br><b>F24</b>   | fw-16              | 19                        | 19 → F24                        |
| 25    | <br><b>F25</b>   | fw-17              | 20                        | 20 → F25                        |
| 26    | <br><b>F26</b>  | fw-5               | 7                         | 7 → S44 → S45<br>→ S46 → F26    |
| 27    | <br><b>F27</b> | fw-5               | 7                         | 7 → S44 → S45<br>→ S47 → F27    |
| 28    | <br><b>F28</b> | fw-5               | 7                         | 7 → S44 → S45<br>→ S48 → F28    |
| 29    | <br><b>F29</b> | fw-18              | S16                       | 11 → F29<br>and/or<br>S16 → F29 |
| 30    | <br><b>F30</b> | fw-18              | S16                       | F29 → F30                       |

| Entry | Fragment                                                                                                                          | Based on framework | Derivative of scaffold ## | Synthetically derived from...           |
|-------|-----------------------------------------------------------------------------------------------------------------------------------|--------------------|---------------------------|-----------------------------------------|
| 31    | 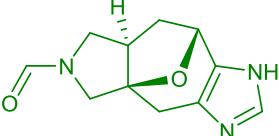 <p><b>F31</b> <math>\equiv</math> <b>22</b></p> | fw-18              | S16                       | F29 $\rightarrow$ F31                   |
| 32    |  <p><b>F32</b> <math>\equiv</math> <b>25</b></p> | fw-18              | S16                       | F29 $\rightarrow$ F32                   |
| 33    |  <p><b>F33</b></p>                               | fw-18              | S16                       | F29 $\rightarrow$ F33                   |
| 34    |  <p><b>F34</b></p>                               | fw-18              | S16                       | F29 $\rightarrow$ F34                   |
| 35    |  <p><b>F35</b></p>                              | fw-19              | S19                       | S19 $\rightarrow$ F35                   |
| 36    |  <p><b>F36</b></p>                             | fw-19              | S20                       | S20 $\rightarrow$ F36                   |
| 37    |  <p><b>F37</b></p>                             | fw-20              | S21                       | S21 $\rightarrow$ F37                   |
| 38    |  <p><b>F38</b></p>                             | fw-4               | S24                       | S24 $\rightarrow$ S49 $\rightarrow$ F38 |
| 39    |  <p><b>F39</b></p>                             | fw-4               | S24                       | S24 $\rightarrow$ S49 $\rightarrow$ F39 |

| Entry | Fragment                                                                                          | Based on framework | Derivative of scaffold ## | Synthetically derived from...                    |
|-------|---------------------------------------------------------------------------------------------------|--------------------|---------------------------|--------------------------------------------------|
| 40    | <br><b>F40</b>   | fw-4               | S25                       | S25 → F40                                        |
| 41    | <br><b>F41</b>   | fw-4               | S25                       | 2c → S50 and S51<br>→ S52 and S53 → F41          |
| 42    | <br><b>F42</b>   | fw-4               | S25                       | 2c → S50 and S51<br>→ S52 and S53<br>→ S54 → F42 |
| 43    | <br><b>F43</b>  | fw-4               | S25                       | 2c → S50 and S51<br>→ S52 and S53 → F43          |
| 44    | <br><b>F44</b> | fw-4               | S25                       | 2c → S50 and S51<br>→ S52 and S53 → F44          |
| 45    | <br><b>F45</b> | fw-21              | S27                       | S27 → F45                                        |
| 46    | <br><b>F46</b> | fw-21              | S27                       | F45 → F46                                        |
| 47    | <br><b>F47</b> | fw-21              | S27                       | F45 → F47                                        |
| 48    | <br><b>F48</b> | fw-21              | S27                       | F45 → F48                                        |

| Entry | Fragment                                                                                         | Based on framework | Derivative of scaffold ## | Synthetically derived from... |
|-------|--------------------------------------------------------------------------------------------------|--------------------|---------------------------|-------------------------------|
|       | <b>F48 ≡ 23</b>                                                                                  |                    |                           |                               |
| 49    | 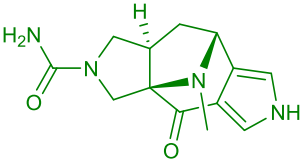<br><b>F49</b>  | fw-21              | S27                       | F45 → F49                     |
| 50    | <br><b>F50</b>  | fw-16              | S32                       | S32 → F50                     |
| 51    | <br><b>F51</b>  | fw-16              | S33                       | S33 → F51                     |
| 52    | <br><b>F52</b> | fw-16              | S34                       | S34 → F52                     |

## 1.2 By Scaffold

See Supplementary Figure 1 for a full summary of the synthetic routes used to prepare the scaffolds.

To count the scaffolds prepared in this study we have considered some closely related scaffolds to be equivalent. The following groups of compounds are counted as a single scaffold:

- **20**  $\equiv$  **S32**  $\equiv$  **S33**  $\equiv$  **S34**
- **S19**  $\equiv$  **S20**

| Entry | Scaffold        | Based on framework | Derivative fragments |
|-------|-----------------|--------------------|----------------------|
| 1     | <p><b>3</b></p> | <b>fw-1</b>        | <b>F4</b>            |
| 2     | <p><b>4</b></p> | <b>fw-2</b>        | -                    |
| 3     | <p><b>5</b></p> | <b>fw-3</b>        | -                    |
| 4     | <p><b>6</b></p> | <b>fw-4</b>        | -                    |
| 5     | <p><b>7</b></p> | <b>fw-5</b>        | <b>F26-F28</b>       |
| 6     | <p><b>8</b></p> | <b>fw-6</b>        | <b>F5-F9</b>         |



| Entry | Scaffold                                                                                             | Based on framework | Derivative fragments |
|-------|------------------------------------------------------------------------------------------------------|--------------------|----------------------|
| 7     | 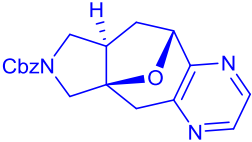 <p><b>9</b></p>    | fw-7               | F10-F11              |
| 8     |  <p><b>10</b></p>   | fw-8               | -                    |
| 9     |  <p><b>11</b></p>   | fw-9               | -                    |
| 10    |  <p><b>12</b></p>   | fw-10              | F12                  |
| 11    |  <p><b>13</b></p>  | fw-4               | F13-F15              |
| 12    |  <p><b>14</b></p> | fw-11              | F16                  |
| 13    |  <p><b>15</b></p> | fw-12              | F17-F18              |
| 14    |  <p><b>16</b></p> | fw-13              | F19                  |
| 15    |  <p><b>17</b></p> | fw-14              | F20-F22              |

| Entry | Scaffold                                                                                              | Based on framework | Derivative fragments |
|-------|-------------------------------------------------------------------------------------------------------|--------------------|----------------------|
| 16    | 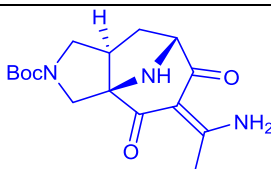 <p><b>18</b></p>    | fw-15              | F23                  |
| 17    |  <p><b>19</b></p>    | fw-16              | F24                  |
| 18    |  <p><b>20</b></p>    | fw-17              | F25                  |
| 19    |  <p><b>S13</b></p>   | fw-4               | -                    |
| 20    |  <p><b>S16</b></p> | fw-18              | F29-F34              |
| 21    |  <p><b>S19</b></p> | fw-19              | F35                  |
| 22    |  <p><b>S20</b></p> | fw-19              | F36                  |
| 23    |  <p><b>S21</b></p> | fw-20              | F37                  |
| 24    |  <p><b>S24</b></p> | fw-4               | F38-F39              |

| Entry | Scaffold                                                                                                                          | Based on framework | Derivative fragments |
|-------|-----------------------------------------------------------------------------------------------------------------------------------|--------------------|----------------------|
| 25    | 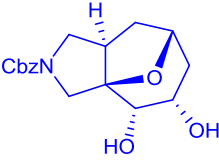 <p style="text-align: center;"><b>S25</b></p>   | fw-4               | F40-F44              |
| 26    |  <p style="text-align: center;"><b>S27</b></p>   | fw-21              | F45-F49              |
| 27    |  <p style="text-align: center;"><b>S32</b></p>   | fw-17              | F50                  |
| 28    |  <p style="text-align: center;"><b>S33</b></p>   | fw-17              | F51                  |
| 29    |  <p style="text-align: center;"><b>S34</b></p> | fw-17              | F52                  |
| 30    |  <p style="text-align: center;"><b>S35</b></p> | fw-22              | F1-F3                |

### 1.3 By Framework

| Framework number | Graph-node-bond framework                                                           | Derivative Scaffold(s) | Derivative Fragments |
|------------------|-------------------------------------------------------------------------------------|------------------------|----------------------|
| fw-1             | 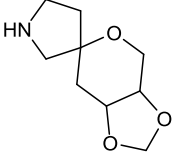   | 3                      | F4                   |
| fw-2             |    | 4                      | -                    |
| fw-3             |    | 5                      | -                    |
| fw-4             |    | 6, 13, S13, S24-S25    | F13-F15, F38-F44     |
| fw-5             |    | 7                      | F26-28               |
| fw-6             |   | 8                      | F5-F9                |
| fw-7             |  | 9                      | F10-F11              |
| fw-8             |  | 10                     | -                    |
| fw-9             |  | 11                     | -                    |
| fw-10            |  | 12                     | F12                  |
| fw-11            |  | 14                     | F16                  |
| fw-12            |  | 15                     | F17-F18              |

|              |                                                                                     |                         |                    |
|--------------|-------------------------------------------------------------------------------------|-------------------------|--------------------|
| <b>fw-13</b> | 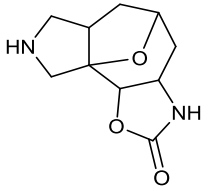   | <b>16</b>               | <b>F19</b>         |
| <b>fw-14</b> |    | <b>17</b>               | <b>F20-F22</b>     |
| <b>fw-15</b> |    | <b>18</b>               | <b>F23</b>         |
| <b>fw-16</b> |    | <b>19</b>               | <b>F24</b>         |
| <b>fw-17</b> |    | <b>20, S32, S33-S34</b> | <b>F25, F50-52</b> |
| <b>fw-18</b> |    | <b>S16</b>              | <b>F29-F34</b>     |
| <b>fw-19</b> |  | <b>S19- S20</b>         | <b>F35-F36</b>     |
| <b>fw-20</b> |  | <b>S21</b>              | <b>F37</b>         |
| <b>fw-21</b> |  | <b>S27</b>              | <b>F45-F49</b>     |
| <b>fw-22</b> |  | <b>S35</b>              | <b>F1-F3</b>       |

## 2.0 Supplementary Figures

Supplementary Figure 1 Synthesis of the 26 natural product-like scaffolds (blue).

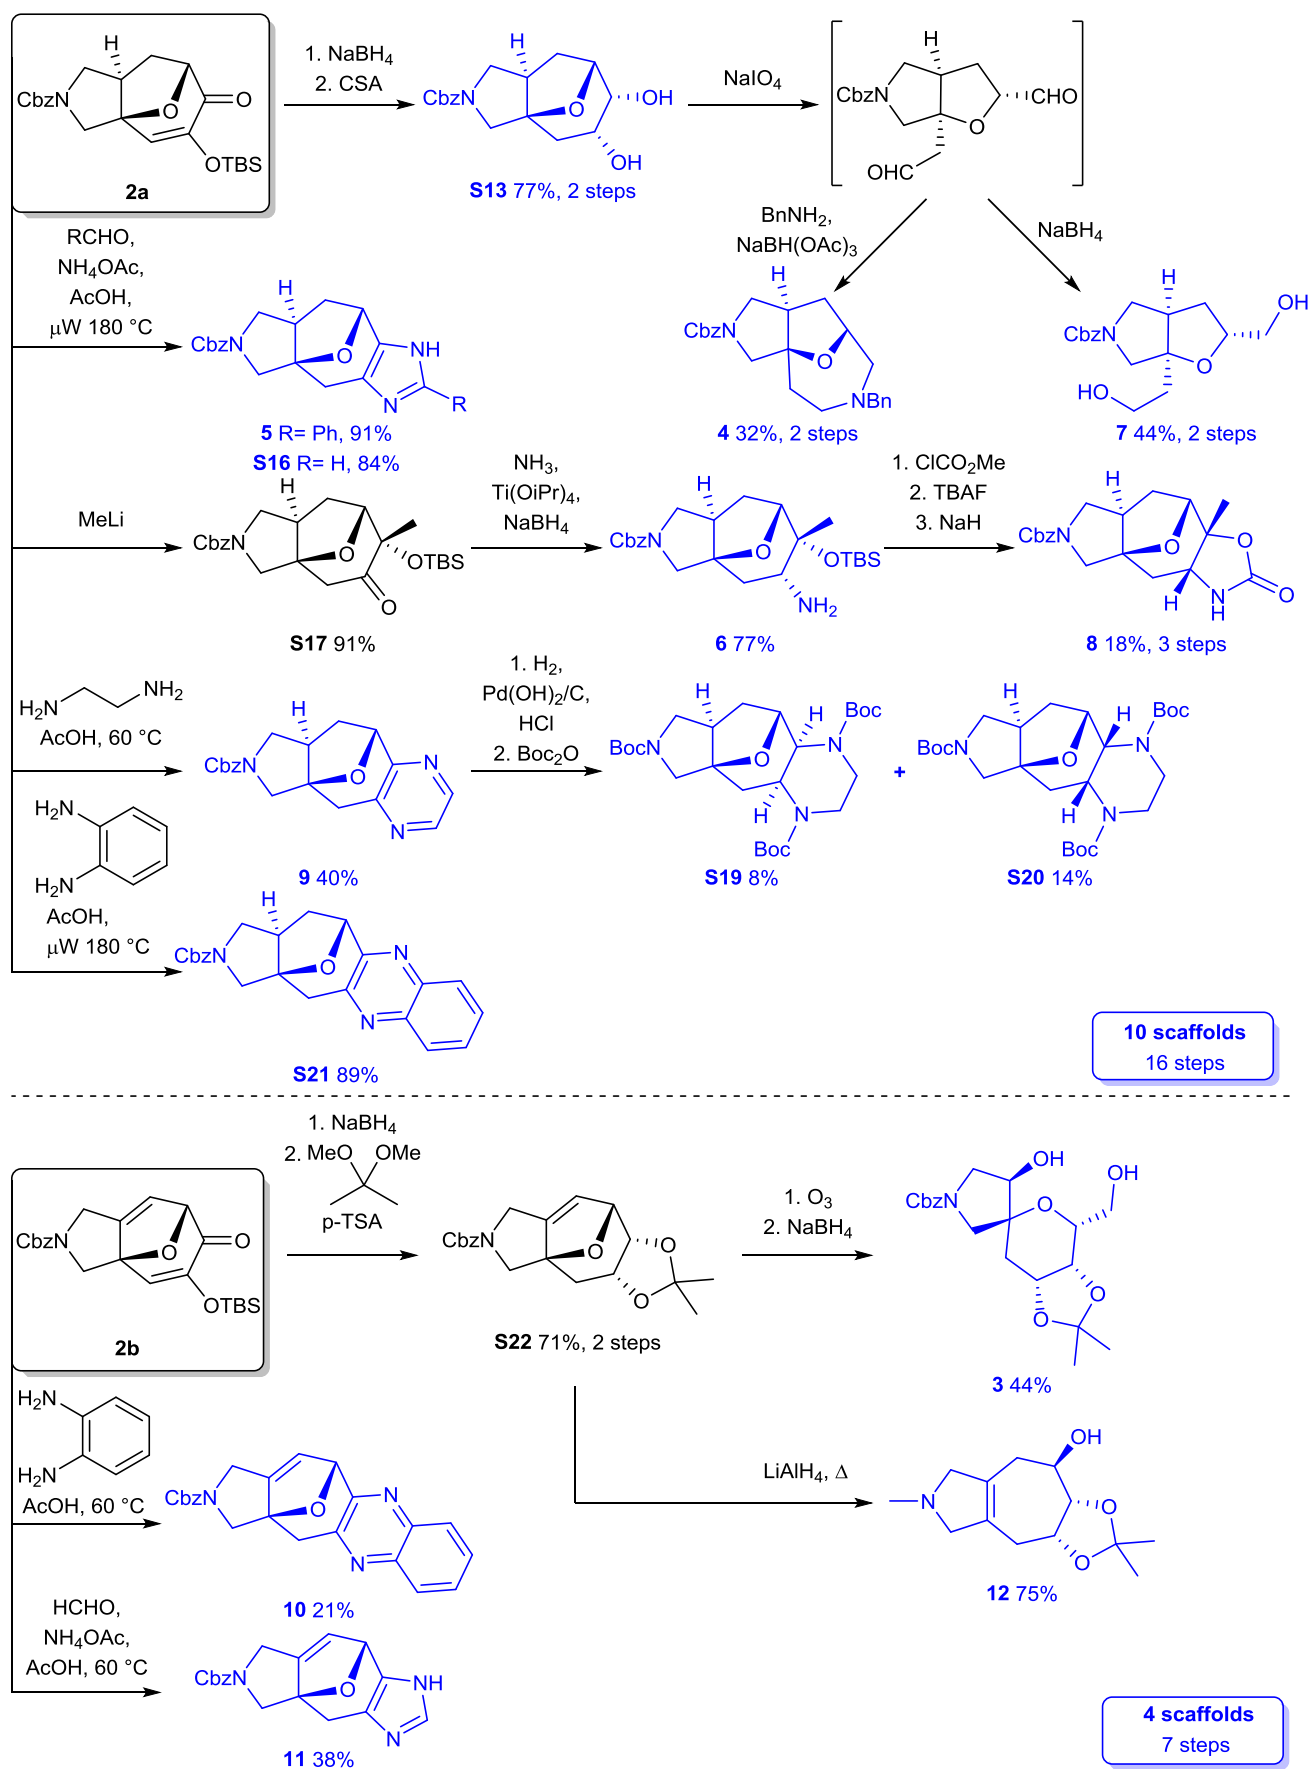

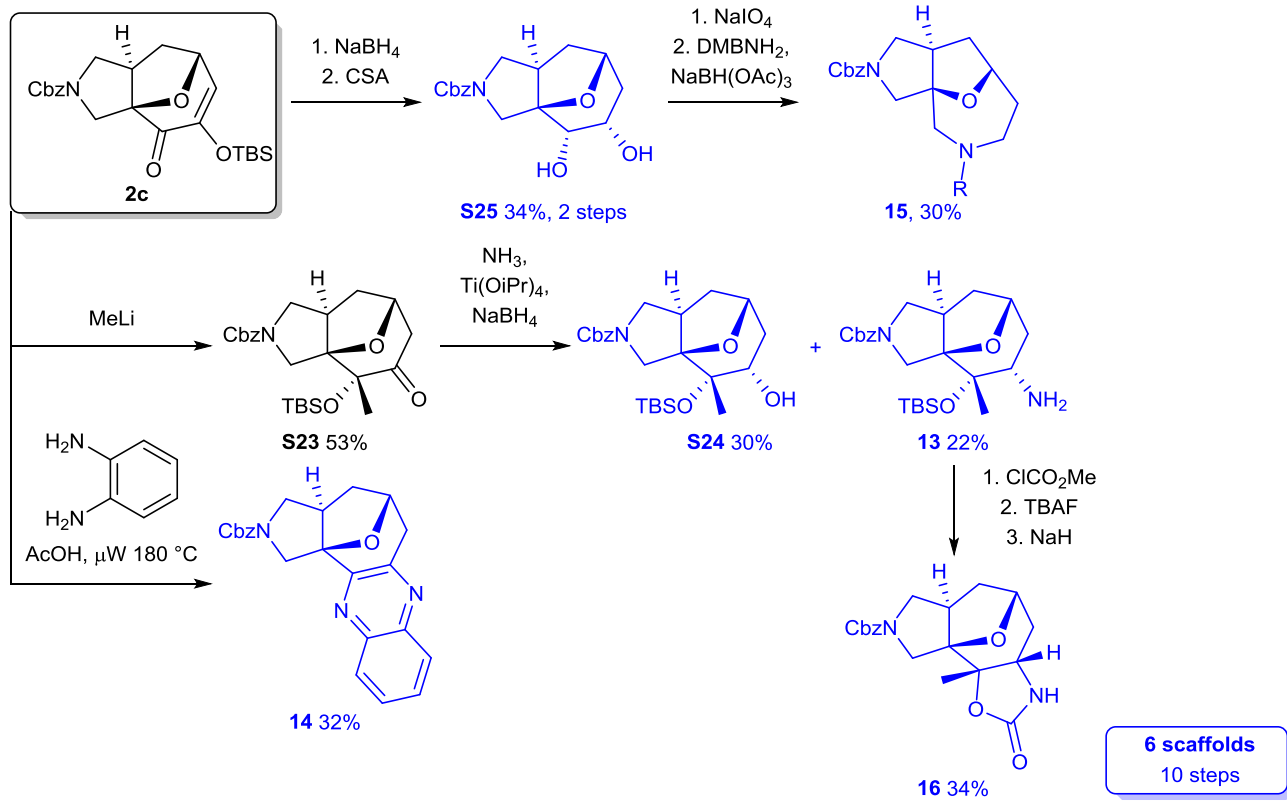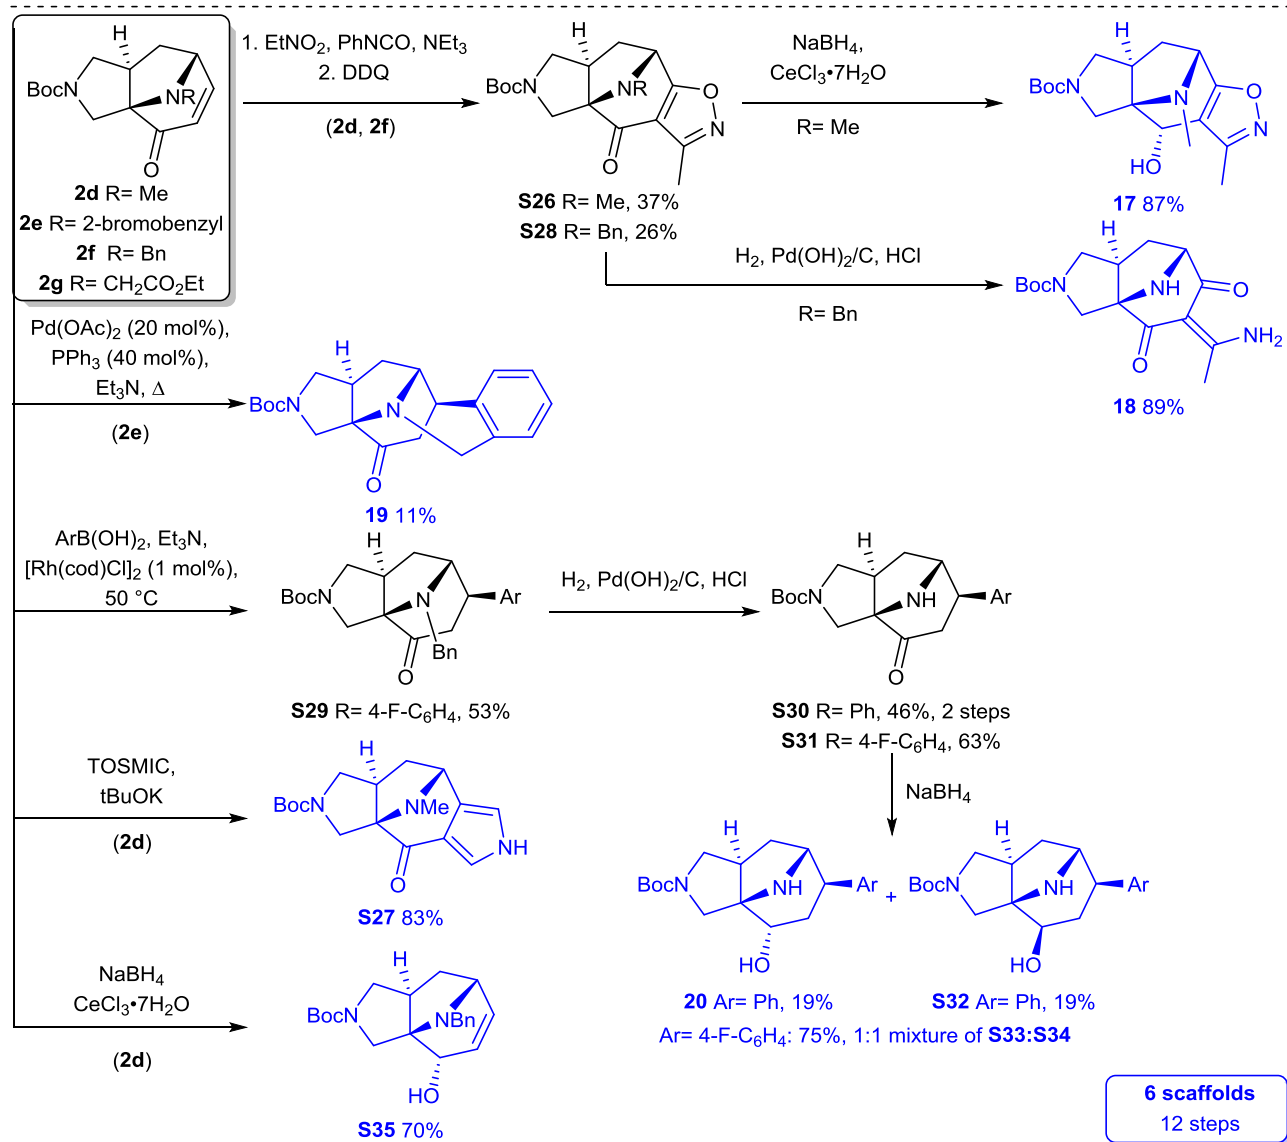

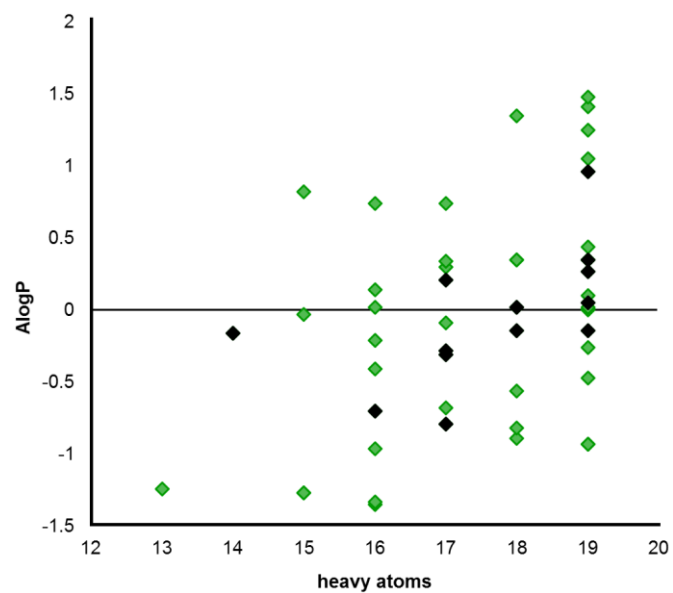

**Supplementary Figure 2** Molecular properties of the 52 fragments prepared. Hits are shown in black.

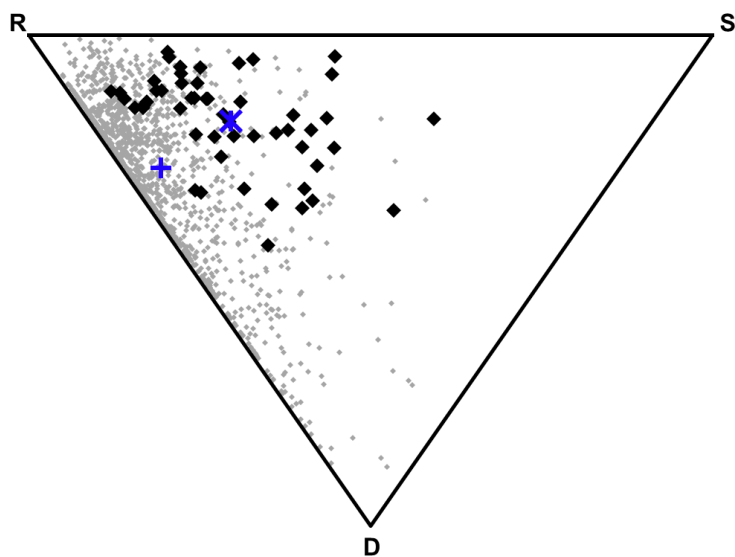

**Supplementary Figure 3** Shape diversity of the 52 fragments prepared and 1,236 commercially-available fragments. R, rod; S, sphere; D, disk.



**Supplementary Figure 4** Interactions between seven fragment hits based on the natural product-like scaffolds and the bromodomain of ATAD2. See Supplementary Table 2 (entries 2-8) for further details. H-bonding interactions of  $\leq 3.5$  Å are shown.

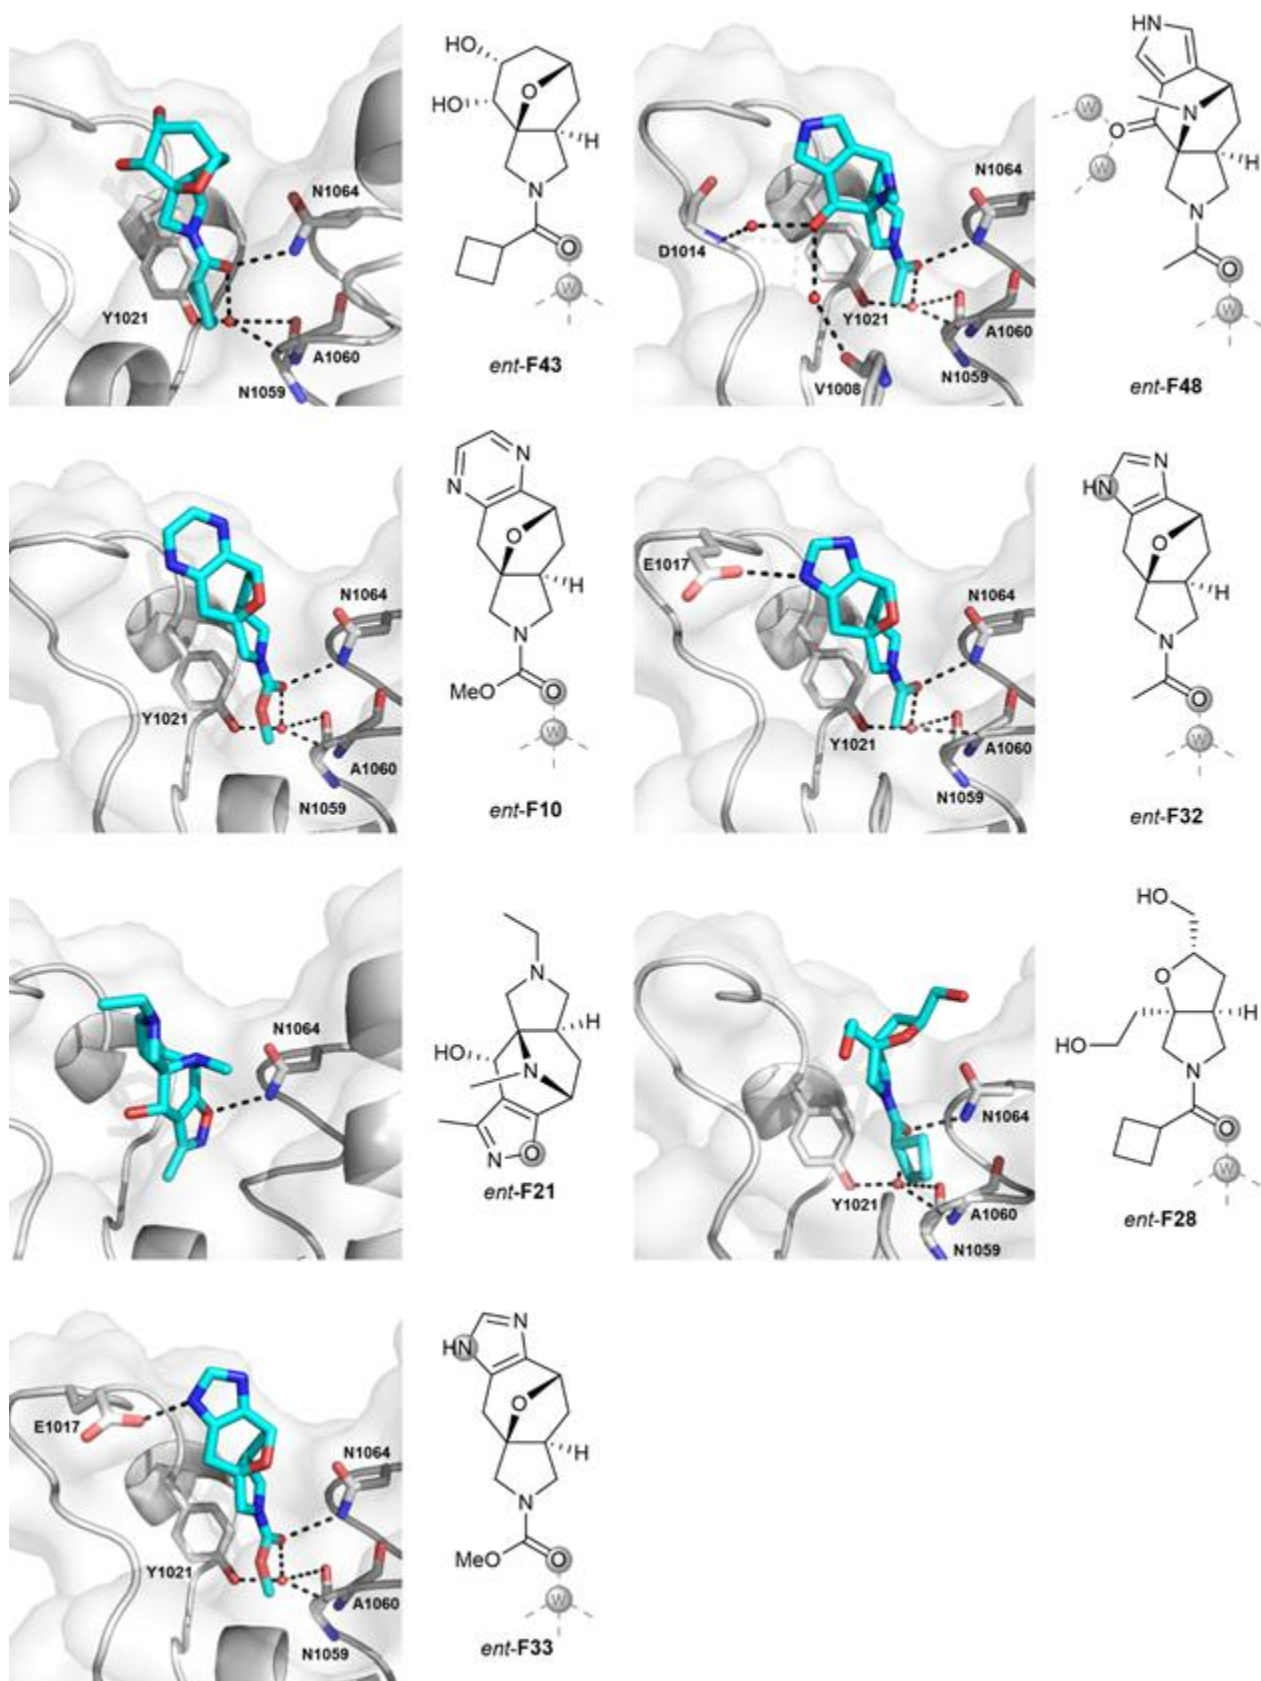

**Supplementary Figure 5** Interactions between eight fragment hits based on the natural product-like scaffolds and the bromodomain of BRD1. See Supplementary Table 3 for further details. H-bonding interactions of  $\leq 3.5$  Å are shown.

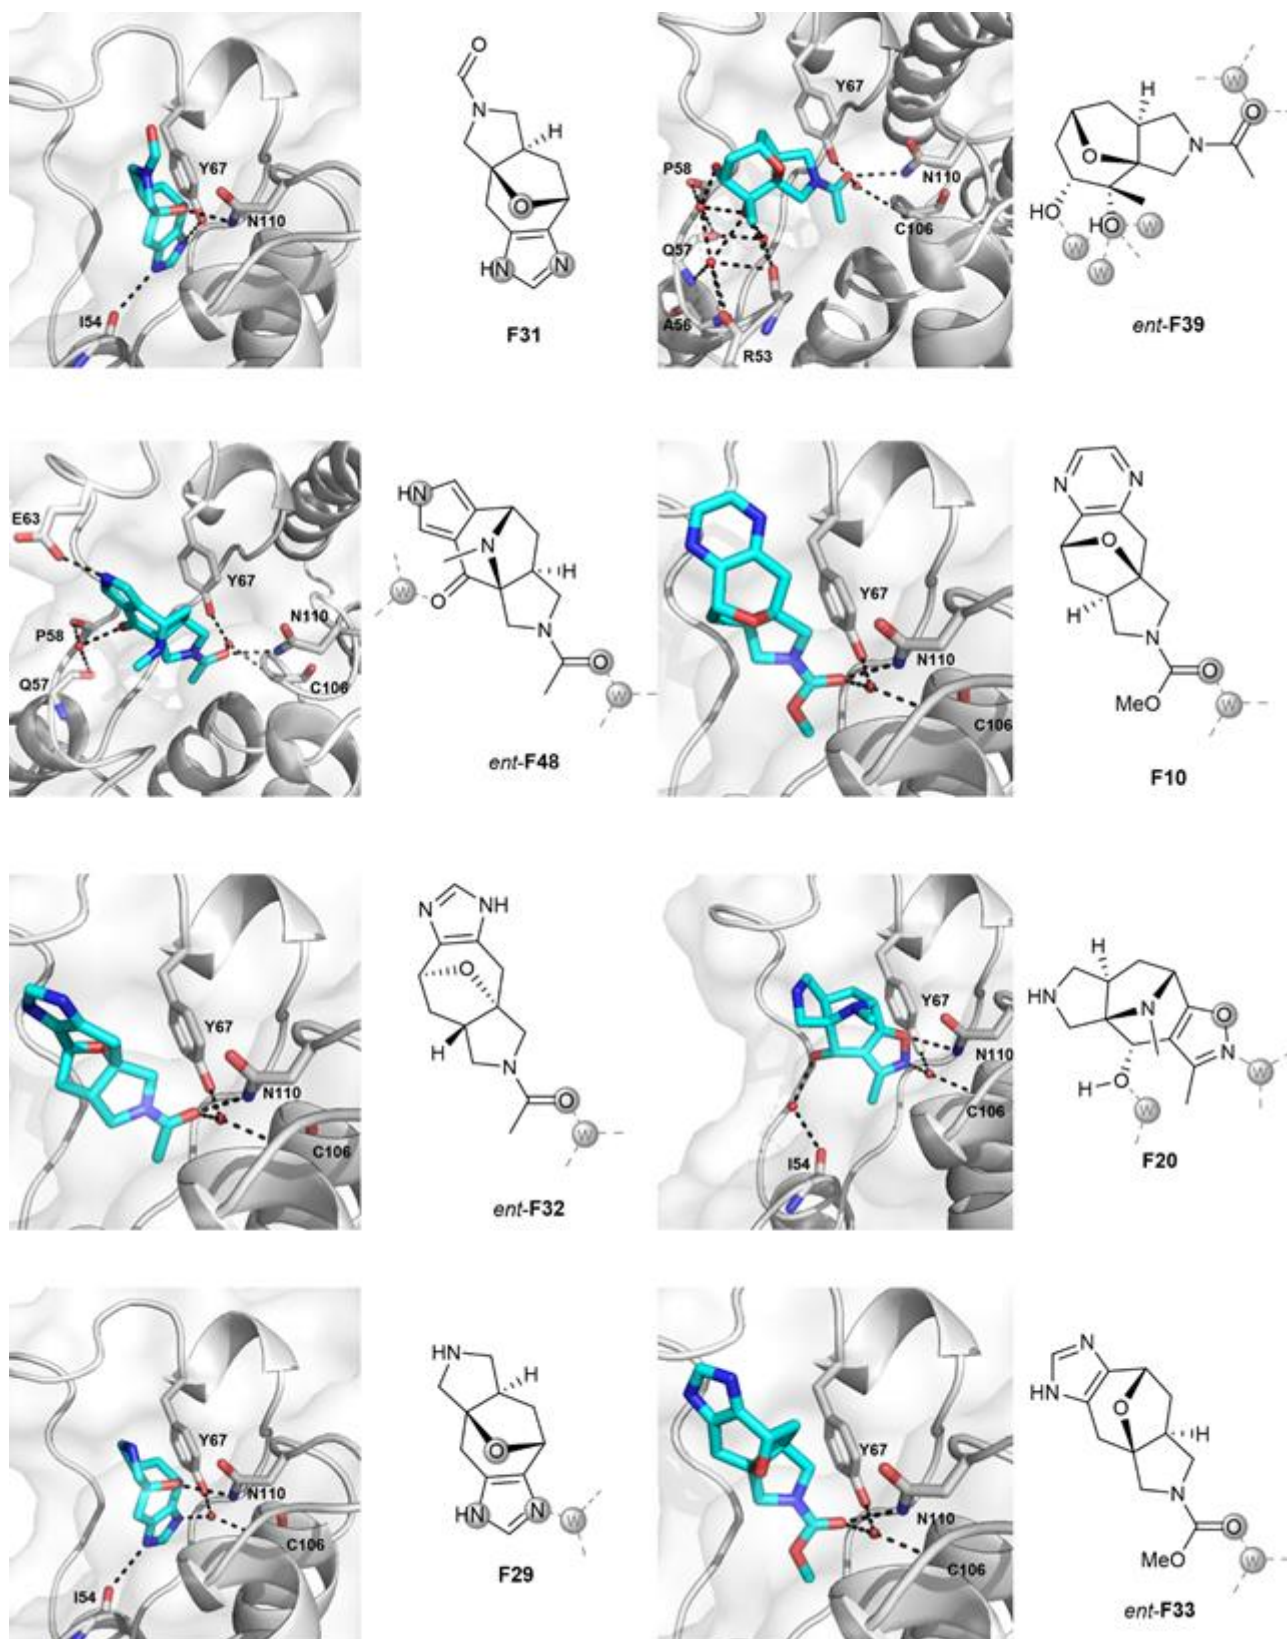

**Supplementary Figure 6** Interactions between two fragment hits **based on the natural product-like scaffolds** and a peripheral binding pocket of JMJD2D. See Supplementary Table 4 for further details. H-bonding interactions of  $\leq 3.5$  Å are shown.

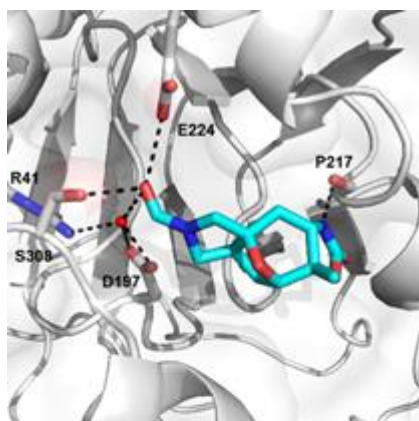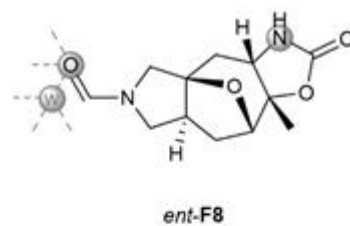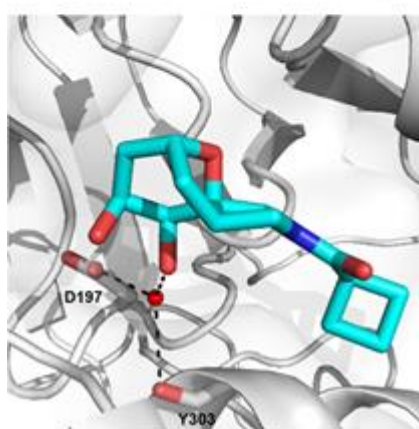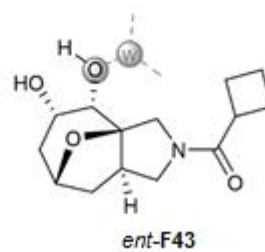



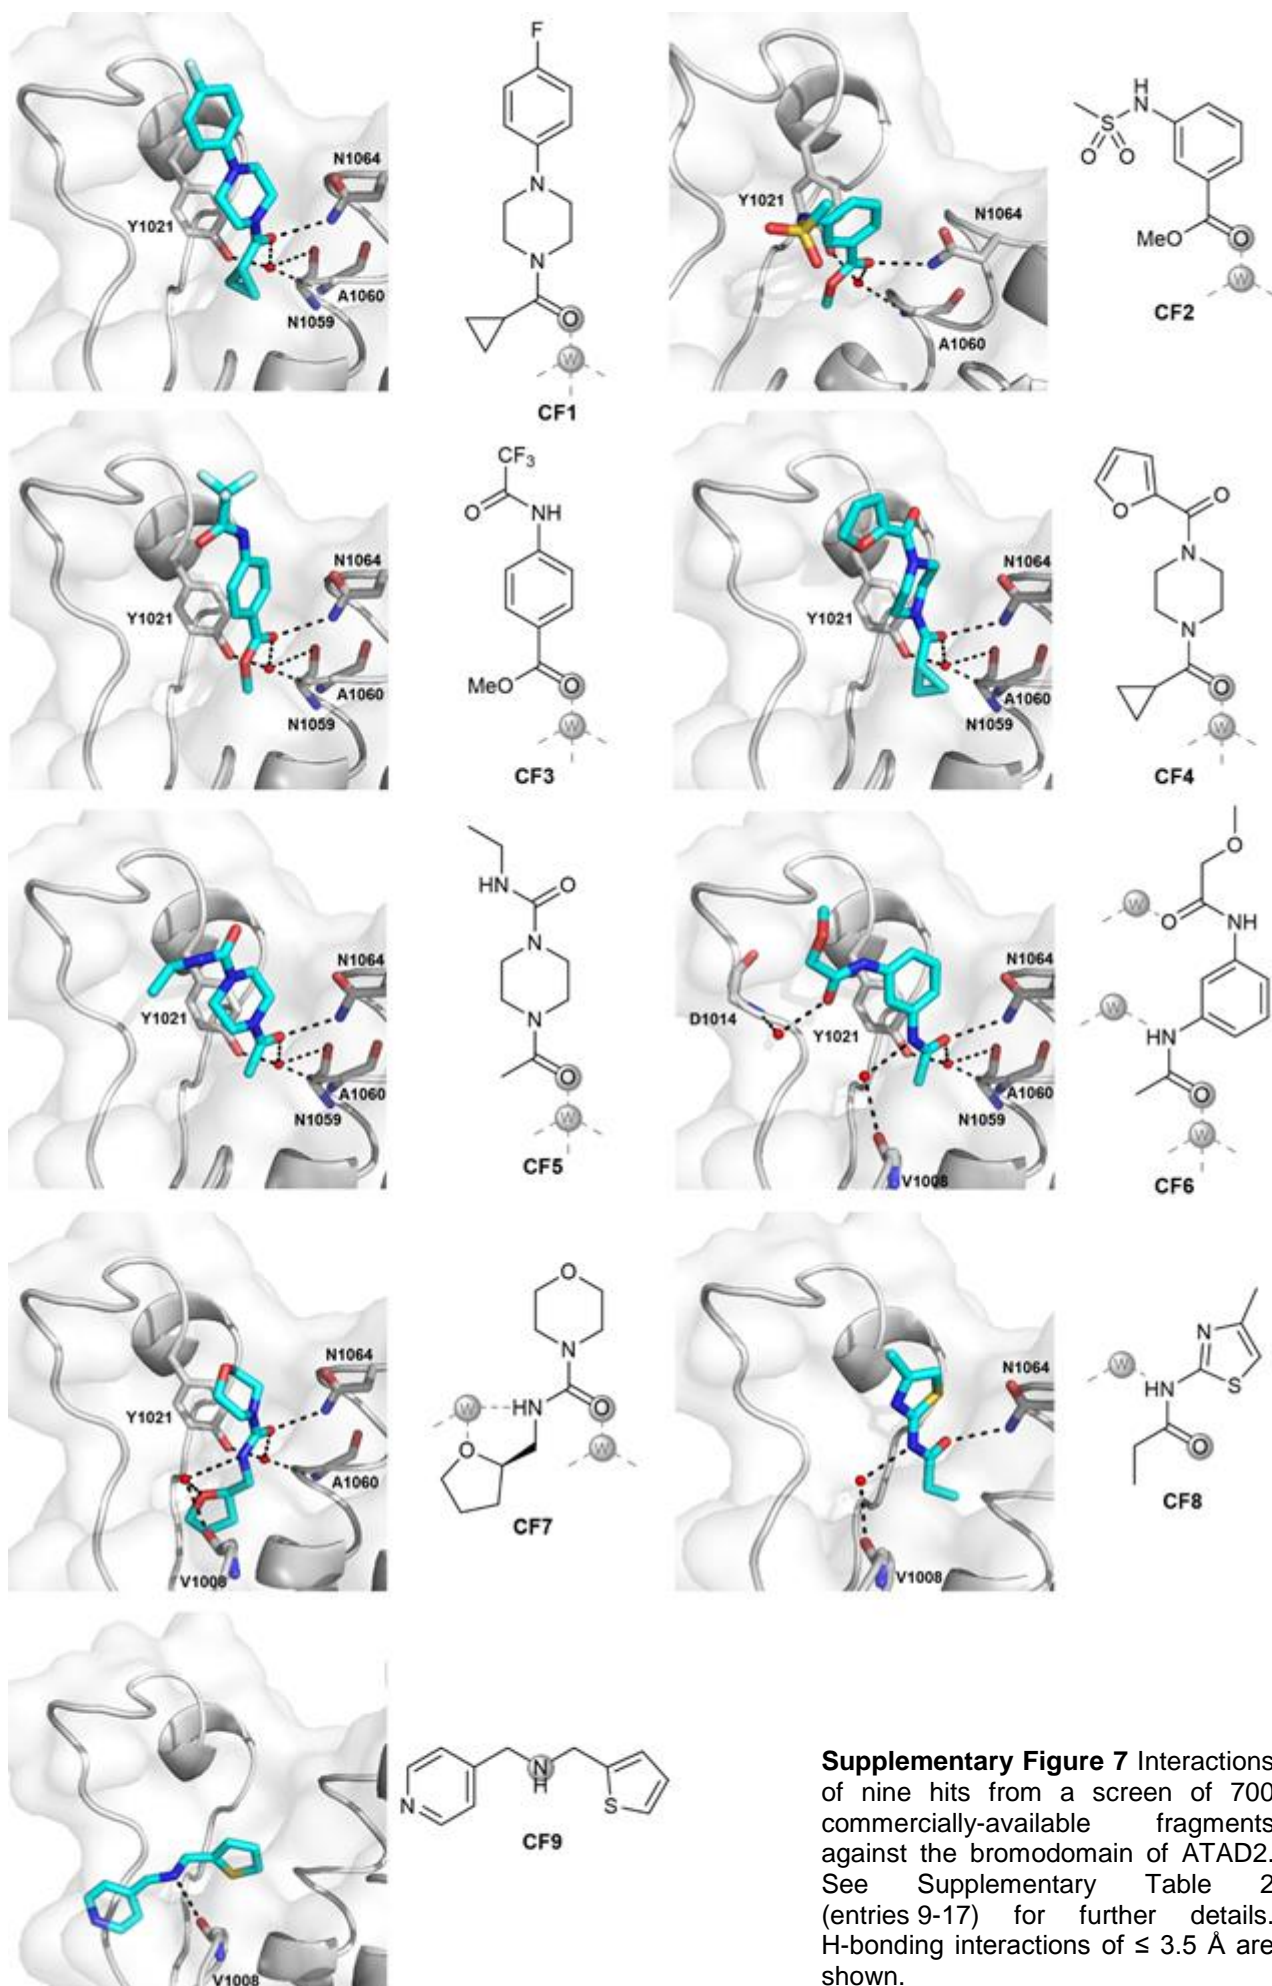

**Supplementary Figure 7** Interactions of nine hits from a screen of 700 commercially-available fragments against the bromodomain of ATAD2. See Supplementary Table 2 (entries 9-17) for further details. H-bonding interactions of  $\leq 3.5$  Å are shown.

### 3.0 Supplementary Tables

**Supplementary Table 1** Substructure occurrence of parent and daughter frameworks of the 26 scaffolds within the 281,897 structures found in the Dictionary of Natural Products (accessed 02/11/16). All other frameworks (Figure 3) produced no hits in the sub-structure search.

| Scaffold                                                                            | No. NPs containing framework | % of NPs containing framework |
|-------------------------------------------------------------------------------------|------------------------------|-------------------------------|
|    | 55131                        | 19.6                          |
|    | 9150                         | 3.2                           |
|    | 9080                         | 3.2                           |
|    | 4421                         | 1.6                           |
|    | 3279                         | 1.2                           |
|   | 805                          | 0.29                          |
|  | 767                          | 0.27                          |
|  | 264                          | 0.09                          |
|  | 251                          | 0.09                          |
|  | 75                           | 0.03                          |
|  | 16                           | 0.006                         |
|  | 14                           | 0.005                         |
|  | 13                           | 0.005                         |
|  | 3                            | 0.0001                        |
|  | 2                            | 0.0007                        |

**Supplementary Table 2** Summary of interactions between fragment hits and ATAD2. Ligands include the truncated acetyl lysine ligand (Entry 1)<sup>S1</sup>, the seven fragment hits based on the natural product-like scaffolds that were identified in this work using high-throughput X-ray crystallography (Entries 2-8), nine commercially available fragment hits identified in this work using high-throughput X-ray crystallography (Entries 9-17), other known fragment hits (criteria: 12 ≤ HA ≤ 19; cyclic) and published hits that were identified using a range of methods (conventional hits entries 18-25;<sup>S1-S4</sup> and thymidine hits entries 26-28<sup>S1</sup>). For comparison, the interactions made by a recently identified chemical probe (Entry 29)<sup>S5</sup> are also provided. H-bonding interactions of ≤ 3.5 Å are listed. Where bridging waters interact with more than one side chain, the interaction containing the shortest H-bond forms the title interaction, and any remaining interactions are detailed in parentheses.

| Entry                                                | Ligand Structure                                                                                   | N1064,<br>γ-O | N1064,<br>γ-NH <sub>2</sub> | H <sub>2</sub> O<br>(→Y1021,<br>Ar-OH) | E1017,<br>δ-O | H <sub>2</sub> O<br>(→D1014,<br>α-N) | H <sub>2</sub> O<br>(→V1008,<br>β-O) | V1008,<br>β-O | D1071,<br>γ-O | D1014,<br>α-N | I1056,<br>β-O | K1011,<br>β-O | M1029,<br>β-O | R1007,<br>ζ-NH <sub>2</sub> | H <sub>2</sub> O<br>(→I1056,<br>β-O) | H <sub>2</sub> O<br>(→P1012,<br>β-O) | H <sub>2</sub> O<br>(→M1029,<br>β-O) |
|------------------------------------------------------|----------------------------------------------------------------------------------------------------|---------------|-----------------------------|----------------------------------------|---------------|--------------------------------------|--------------------------------------|---------------|---------------|---------------|---------------|---------------|---------------|-----------------------------|--------------------------------------|--------------------------------------|--------------------------------------|
| <b>Natural ligand (truncated)</b>                    |                                                                                                    |               |                             |                                        |               |                                      |                                      |               |               |               |               |               |               |                             |                                      |                                      |                                      |
| 1                                                    | 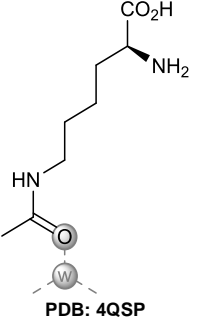 <p>PDB: 4QSP</p> |               | 2.7                         | 2.7<br>(&<br>→A1060,<br>α-N)           |               |                                      |                                      |               |               |               |               |               |               |                             |                                      |                                      |                                      |
| <b>Fragments based on natural product paralogues</b> |                                                                                                    |               |                             |                                        |               |                                      |                                      |               |               |               |               |               |               |                             |                                      |                                      |                                      |
| 2                                                    |  <p>ent-F28</p>  |               | 2.9                         | 2.8                                    |               | 3.5<br>(& →<br>E1017,<br>δ-O)        |                                      |               |               |               |               |               |               |                             |                                      |                                      |                                      |

| Entry | Ligand Structure                                                                                         | N1064,<br>γ-O | N1064,<br>γ-NH <sub>2</sub> | H <sub>2</sub> O<br>(→Y1021,<br>Ar-OH) | E1017,<br>δ-O | H <sub>2</sub> O<br>(→D1014,<br>α-N) | H <sub>2</sub> O<br>(→V1008,<br>β-O) | V1008,<br>β-O | D1071,<br>γ-O | D1014,<br>α-N | I1056,<br>β-O | K1011,<br>β-O | M1029,<br>β-O | R1007,<br>ζ-NH <sub>2</sub> | H <sub>2</sub> O<br>(→I1056,<br>β-O) | H <sub>2</sub> O<br>(→P1012,<br>β-O) | H <sub>2</sub> O<br>(→M1029,<br>β-O) |  |
|-------|----------------------------------------------------------------------------------------------------------|---------------|-----------------------------|----------------------------------------|---------------|--------------------------------------|--------------------------------------|---------------|---------------|---------------|---------------|---------------|---------------|-----------------------------|--------------------------------------|--------------------------------------|--------------------------------------|--|
| 3     | 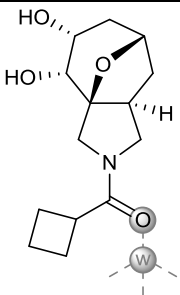 <p><i>ent-F43</i></p>  |               | 2.9                         | 2.8                                    |               | 3.5                                  |                                      |               |               |               |               |               |               |                             |                                      |                                      |                                      |  |
| 4     |  <p><i>ent-F10</i></p>  |               | 3.1                         | 2.8<br>(<br>→N1059,<br>β-O)            | 3.1           |                                      |                                      |               |               |               |               |               |               |                             |                                      |                                      |                                      |  |
| 5     |  <p><i>ent-F32</i></p> |               | 3.0                         | 2.8<br>(<br>→N1059,<br>β-O)            | 3.1           |                                      |                                      |               |               |               |               |               |               |                             |                                      |                                      |                                      |  |

| Entry | Ligand Structure                                                                                         | N1064,<br>γ-O | N1064,<br>γ-NH <sub>2</sub> | H <sub>2</sub> O<br>(→Y1021,<br>Ar-OH) | E1017,<br>δ-O | H <sub>2</sub> O<br>(→D1014,<br>α-N) | H <sub>2</sub> O<br>(→V1008,<br>β-O) | V1008,<br>β-O | D1071,<br>γ-O | D1014,<br>α-N | I1056,<br>β-O | K1011,<br>β-O | M1029,<br>β-O | R1007,<br>ζ-NH <sub>2</sub> | H <sub>2</sub> O<br>(→I1056,<br>β-O) | H <sub>2</sub> O<br>(→P1012,<br>β-O) | H <sub>2</sub> O<br>(→M1029,<br>β-O) |  |
|-------|----------------------------------------------------------------------------------------------------------|---------------|-----------------------------|----------------------------------------|---------------|--------------------------------------|--------------------------------------|---------------|---------------|---------------|---------------|---------------|---------------|-----------------------------|--------------------------------------|--------------------------------------|--------------------------------------|--|
| 6     | 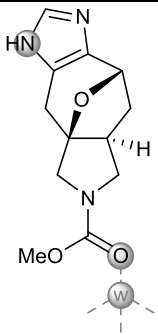 <p><i>ent-F33</i></p>  |               | 3.1                         | 2.8<br>(&<br>→N1059,<br>β-O)           | 2.8           |                                      |                                      |               |               |               |               |               |               |                             |                                      |                                      |                                      |  |
| 7     |  <p><i>ent-F48</i></p>  |               | 3.0                         | 2.7                                    | 2.9, 3.1      | 2.3                                  | 3.3                                  |               |               |               |               |               |               |                             |                                      |                                      |                                      |  |
| 8     |  <p><i>ent-F21</i></p> |               | 3.0                         |                                        |               |                                      |                                      |               |               |               |               |               |               |                             |                                      |                                      |                                      |  |



| Entry                                         | Ligand Structure                                                                                  | N1064,<br>γ-O | N1064,<br>γ-NH <sub>2</sub> | H <sub>2</sub> O<br>(→Y1021,<br>Ar-OH)         | E1017,<br>δ-O | H <sub>2</sub> O<br>(→D1014,<br>α-N) | H <sub>2</sub> O<br>(→V1008,<br>β-O) | V1008,<br>β-O | D1071,<br>γ-O | D1014,<br>α-N | I1056,<br>β-O | K1011,<br>β-O | M1029,<br>β-O | R1007,<br>ζ-NH <sub>2</sub> | H <sub>2</sub> O<br>(→I1056,<br>β-O) | H <sub>2</sub> O<br>(→P1012,<br>β-O) | H <sub>2</sub> O<br>(→M1029,<br>β-O) |
|-----------------------------------------------|---------------------------------------------------------------------------------------------------|---------------|-----------------------------|------------------------------------------------|---------------|--------------------------------------|--------------------------------------|---------------|---------------|---------------|---------------|---------------|---------------|-----------------------------|--------------------------------------|--------------------------------------|--------------------------------------|
| <b>Diamond-SGC Poised Library (DSPL) hits</b> |                                                                                                   |               |                             |                                                |               |                                      |                                      |               |               |               |               |               |               |                             |                                      |                                      |                                      |
| 9                                             | 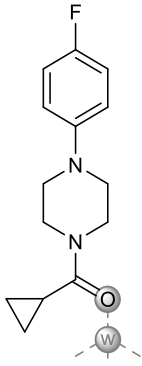 <p>24 ≡ CF1</p> |               | 3.1                         | 2.7<br>(&<br>→A1060,<br>α-N;<br>N1059,<br>β-O) |               |                                      |                                      |               |               |               |               |               |               |                             |                                      |                                      |                                      |
| 10                                            |  <p>CF2</p>      |               | 3.0                         | 2.8<br>(&<br>→A1060,<br>α-N)                   |               |                                      |                                      |               |               |               |               |               |               |                             |                                      |                                      |                                      |
| 11                                            |  <p>CF3</p>     |               | 3.1                         | 2.8<br>(&<br>→A1060,<br>α-N;<br>N1059,<br>β-O) |               |                                      |                                      |               |               |               |               |               |               |                             |                                      |                                      |                                      |

| Entry | Ligand Structure                                                                              | N1064,<br>γ-O | N1064,<br>γ-NH <sub>2</sub> | H <sub>2</sub> O<br>(→Y1021,<br>Ar-OH)         | E1017,<br>δ-O | H <sub>2</sub> O<br>(→D1014,<br>α-N) | H <sub>2</sub> O<br>(→V1008,<br>β-O) | V1008,<br>β-O | D1071,<br>γ-O | D1014,<br>α-N | I1056,<br>β-O | K1011,<br>β-O | M1029,<br>β-O | R1007,<br>ζ-NH <sub>2</sub> | H <sub>2</sub> O<br>(→I1056,<br>β-O) | H <sub>2</sub> O<br>(→P1012,<br>β-O) | H <sub>2</sub> O<br>(→M1029,<br>β-O) |  |
|-------|-----------------------------------------------------------------------------------------------|---------------|-----------------------------|------------------------------------------------|---------------|--------------------------------------|--------------------------------------|---------------|---------------|---------------|---------------|---------------|---------------|-----------------------------|--------------------------------------|--------------------------------------|--------------------------------------|--|
| 12    | 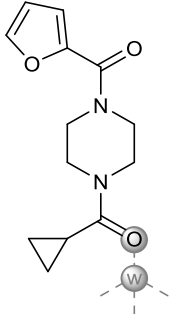 <p>CF4</p>  |               | 3.1                         | 2.8<br>(&<br>→A1060,<br>α-N;<br>N1059,<br>β-O) |               |                                      |                                      |               |               |               |               |               |               |                             |                                      |                                      |                                      |  |
| 13    |  <p>CF5</p>  |               | 3.0                         | 2.8<br>(&<br>→A1060,<br>α-N;<br>N1059,<br>β-O) |               |                                      |                                      |               |               |               |               |               |               |                             |                                      |                                      |                                      |  |
| 14    |  <p>CF6</p> |               | 3.2                         | 2.8<br>(&<br>→A1060,<br>α-N;<br>N1059,<br>β-O) |               | 2.8                                  | 3.1                                  |               |               |               |               |               |               |                             |                                      |                                      |                                      |  |

| Entry | Ligand Structure                                                                             | N1064,<br>γ-O | N1064,<br>γ-NH <sub>2</sub> | H <sub>2</sub> O<br>(→Y1021,<br>Ar-OH) | E1017,<br>δ-O | H <sub>2</sub> O<br>(→D1014,<br>α-N) | H <sub>2</sub> O<br>(→V1008,<br>β-O) | V1008,<br>β-O | D1071,<br>γ-O | D1014,<br>α-N | I1056,<br>β-O | K1011,<br>β-O | M1029,<br>β-O | R1007,<br>ζ-NH <sub>2</sub> | H <sub>2</sub> O<br>(→I1056,<br>β-O) | H <sub>2</sub> O<br>(→P1012,<br>β-O) | H <sub>2</sub> O<br>(→M1029,<br>β-O) |
|-------|----------------------------------------------------------------------------------------------|---------------|-----------------------------|----------------------------------------|---------------|--------------------------------------|--------------------------------------|---------------|---------------|---------------|---------------|---------------|---------------|-----------------------------|--------------------------------------|--------------------------------------|--------------------------------------|
| 15    | 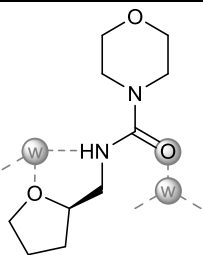 <p>CF7</p> |               | 3.0                         | 2.7<br>(&<br>→A1060,<br>α-N)           |               |                                      | 2.7, 3.5                             |               |               |               |               |               |               |                             |                                      |                                      |                                      |
| 16    |  <p>CF8</p> |               | 3.1                         |                                        |               |                                      | 2.9                                  |               |               |               |               |               |               |                             |                                      |                                      |                                      |
| 17    |  <p>CF9</p> |               |                             |                                        |               |                                      |                                      | 2.9           |               |               |               |               |               |                             |                                      |                                      |                                      |

| Entry                                       | Ligand Structure | N1064,<br>γ-O | N1064,<br>γ-NH <sub>2</sub> | H <sub>2</sub> O<br>(→Y1021,<br>Ar-OH) | E1017,<br>δ-O | H <sub>2</sub> O<br>(→D1014,<br>α-N) | H <sub>2</sub> O<br>(→V1008,<br>β-O) | V1008,<br>β-O | D1071,<br>γ-O | D1014,<br>α-N | I1056,<br>β-O | K1011,<br>β-O | M1029,<br>β-O | R1007,<br>ζ-NH <sub>2</sub> | H <sub>2</sub> O<br>(→I1056,<br>β-O) | H <sub>2</sub> O<br>(→P1012,<br>β-O) | H <sub>2</sub> O<br>(→M1029,<br>β-O) |  |
|---------------------------------------------|------------------|---------------|-----------------------------|----------------------------------------|---------------|--------------------------------------|--------------------------------------|---------------|---------------|---------------|---------------|---------------|---------------|-----------------------------|--------------------------------------|--------------------------------------|--------------------------------------|--|
| <b>Other literature hits (13 ≤ HA ≤ 19)</b> |                  |               |                             |                                        |               |                                      |                                      |               |               |               |               |               |               |                             |                                      |                                      |                                      |  |
| 18                                          | <p>PDB: 5A5O</p> | 3.1           | 2.7                         | 2.7<br>(&<br>→A1060,<br>α-N)           |               |                                      |                                      |               |               |               |               |               |               |                             |                                      |                                      |                                      |  |
| 19                                          | <p>PDB: 5A5P</p> | 3.1; 3.1      | 2.7                         | 2.7<br>(&<br>→A1060,<br>α-N)           |               |                                      |                                      |               | 2.9           |               |               |               |               |                             |                                      |                                      |                                      |  |
| 20                                          | <p>PDB: 5A5Q</p> | 3.0; 2.9      | 2.8                         | 2.7<br>(&<br>→A1060,<br>α-N)           |               |                                      |                                      |               | 2.6           |               |               |               |               |                             |                                      |                                      |                                      |  |

| Entry | Ligand Structure                                                                                     | N1064,<br>γ-O | N1064,<br>γ-NH <sub>2</sub> | H <sub>2</sub> O<br>(→Y1021,<br>Ar-OH)              | E1017,<br>δ-O | H <sub>2</sub> O<br>(→D1014,<br>α-N) | H <sub>2</sub> O<br>(→V1008,<br>β-O) | V1008,<br>β-O | D1071,<br>γ-O | D1014,<br>α-N | I1056,<br>β-O | K1011,<br>β-O | M1029,<br>β-O | R1007,<br>ζ-NH <sub>2</sub> | H <sub>2</sub> O<br>(→I1056,<br>β-O) | H <sub>2</sub> O<br>(→P1012,<br>β-O) | H <sub>2</sub> O<br>(→M1029,<br>β-O) |
|-------|------------------------------------------------------------------------------------------------------|---------------|-----------------------------|-----------------------------------------------------|---------------|--------------------------------------|--------------------------------------|---------------|---------------|---------------|---------------|---------------|---------------|-----------------------------|--------------------------------------|--------------------------------------|--------------------------------------|
| 21    | 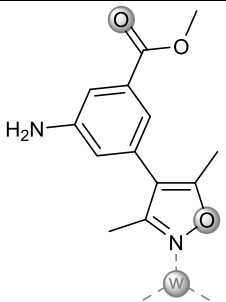 <p>PDB: 4TTE</p>   |               | 3.0                         | 2.7<br>(&<br>→A1060,<br>α-N)                        |               |                                      |                                      |               |               |               |               |               |               | 3.5                         |                                      |                                      |                                      |
| 22    |  <p>PDB: 4TYL</p>   |               | 3.1                         | 2.7<br>(&<br>→A1060,<br>α-N;<br>N1059,<br>β-O)      |               | 3.2                                  |                                      |               |               |               |               |               |               |                             |                                      | 2.8<br>(&<br>→K1011,<br>β-O)         |                                      |
| 23    |  <p>PDB: 4TZ2</p>  |               | 2.6;<br>3.1                 | 2.7                                                 |               |                                      |                                      |               |               |               | 2.9           |               | 3.4           |                             |                                      |                                      |                                      |
| 24    |  <p>PDB: 4TZ8</p> |               | 3.0                         | 3.2; 3.1<br>(&<br>→A1060,<br>α-N;<br>N1059,<br>β-O) |               |                                      | 2.9<br>(& →K1011,<br>β-O)            | 3.0           |               |               |               | 3.1           |               |                             | 3.5                                  |                                      | 2.6, 3.3                             |

| Entry                            | Ligand Structure                                                                                | N1064,<br>γ-O | N1064,<br>γ-NH <sub>2</sub> | H <sub>2</sub> O<br>(→Y1021,<br>Ar-OH)         | E1017,<br>δ-O | H <sub>2</sub> O<br>(→D1014,<br>α-N) | H <sub>2</sub> O<br>(→V1008,<br>β-O) | V1008,<br>β-O | D1071,<br>γ-O | D1014,<br>α-N | I1056,<br>β-O | K1011,<br>β-O | M1029,<br>β-O | R1007,<br>ζ-NH <sub>2</sub> | H <sub>2</sub> O<br>(→I1056,<br>β-O) | H <sub>2</sub> O<br>(→P1012,<br>β-O) | H <sub>2</sub> O<br>(→M1029,<br>β-O) |
|----------------------------------|-------------------------------------------------------------------------------------------------|---------------|-----------------------------|------------------------------------------------|---------------|--------------------------------------|--------------------------------------|---------------|---------------|---------------|---------------|---------------|---------------|-----------------------------|--------------------------------------|--------------------------------------|--------------------------------------|
| 25                               | 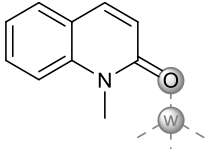<br>PDB: 4QST  |               | 2.8                         | 2.5<br>(&<br>→A1060,<br>α-N;<br>N1059,<br>β-O) |               |                                      |                                      |               |               |               |               |               |               |                             |                                      |                                      |                                      |
| <b>Thymidine literature hits</b> |                                                                                                 |               |                             |                                                |               |                                      |                                      |               |               |               |               |               |               |                             |                                      |                                      |                                      |
| 26                               | <br>PDB: 4QSV  | 3.1           | 2.9                         | 2.6<br>(&<br>→A1060,<br>α-N)                   | 3.4           | 2.8                                  | 2.6                                  |               |               |               |               |               |               |                             |                                      |                                      |                                      |
| 27                               | <br>PDB: 4QSW  | 3.1           | 2.8                         | 2.6<br>(&<br>→A1060,<br>α-N)                   | 3.2; 3.1      |                                      | 2.5                                  |               |               | 3.2           |               |               |               |                             |                                      |                                      |                                      |
| 28                               | <br>PDB: 4QSX | 2.8           | 2.8                         | 2.7<br>(&<br>→A1060,<br>α-N)                   |               |                                      | 2.9                                  |               |               |               |               |               |               |                             |                                      |                                      |                                      |

| Entry                             | Ligand Structure                                                                                   | N1064,<br>γ-O | N1064,<br>γ-NH <sub>2</sub> | H <sub>2</sub> O<br>(→Y1021,<br>Ar-OH) | E1017,<br>δ-O | H <sub>2</sub> O<br>(→D1014,<br>α-N) | H <sub>2</sub> O<br>(→V1008,<br>β-O) | V1008,<br>β-O | D1071,<br>γ-O | D1014,<br>α-N | I1056,<br>β-O | K1011,<br>β-O | M1029,<br>β-O | R1007,<br>ζ-NH <sub>2</sub> | H <sub>2</sub> O<br>(→I1056,<br>β-O) | H <sub>2</sub> O<br>(→P1012,<br>β-O) | H <sub>2</sub> O<br>(→M1029,<br>β-O) |
|-----------------------------------|----------------------------------------------------------------------------------------------------|---------------|-----------------------------|----------------------------------------|---------------|--------------------------------------|--------------------------------------|---------------|---------------|---------------|---------------|---------------|---------------|-----------------------------|--------------------------------------|--------------------------------------|--------------------------------------|
| <b>Established chemical probe</b> |                                                                                                    |               |                             |                                        |               |                                      |                                      |               |               |               |               |               |               |                             |                                      |                                      |                                      |
| 29                                | 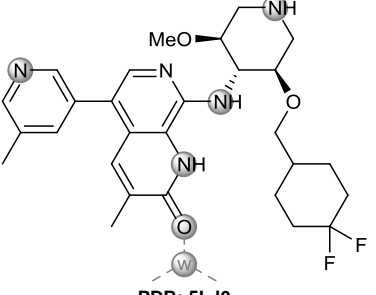 <p>PDB: 5LJ0</p> | 2.9; 2.8      | 2.8                         | 2.7<br>(<br>→A1060,<br>α-N)            |               |                                      |                                      |               | 2.6           | 3.1           |               |               |               |                             |                                      |                                      |                                      |

**Supplementary Table 3** Summary interactions between eight fragment hits based on the natural product-like scaffolds and BRD1, identified using high-throughput X-ray crystallography.

| Entry | Ligand Structure                                                                                                   | N110,<br>α-N | H <sub>2</sub> O<br>(→Y67, Ar-OH) | I54,<br>β-O | H <sub>2</sub> O<br>(→I54, β-O) | H <sub>2</sub> O<br>(→P58, β-O) | H <sub>2</sub> O<br>(→Q57, α-N) | H <sub>2</sub> O<br>(→Q57, β-N) | Y67,<br>Ar-OH | E63,<br>δ-O | Notes                           |
|-------|--------------------------------------------------------------------------------------------------------------------|--------------|-----------------------------------|-------------|---------------------------------|---------------------------------|---------------------------------|---------------------------------|---------------|-------------|---------------------------------|
| 1     | 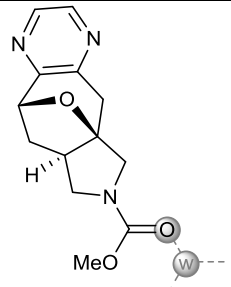 <p><b>26 (≡ F10)</b></p>         | 3.0          | 2.8<br>[& C106, α-N]              |             |                                 |                                 |                                 |                                 |               |             | The enantiomer was an ATAD2 hit |
| 2     |  <p><i>ent-28 (≡ ent-F32)</i></p> | 3.2          | 2.7<br>[& C106, α-N]              |             |                                 |                                 |                                 |                                 |               |             | ATAD2 hit                       |
| 3     |  <p><i>ent-F33</i></p>           | 3.1          | 2.9<br>[& C106, α-N]]             |             |                                 |                                 |                                 |                                 |               |             | ATAD2 hit                       |



| Entry | Ligand Structure                                                                                        | N110,<br>α-N | H <sub>2</sub> O<br>(→Y67, Ar-OH) | I54,<br>β-O | H <sub>2</sub> O<br>(→I54, β-O) | H <sub>2</sub> O<br>(→P58, β-O)        | H <sub>2</sub> O<br>(→Q57, α-N)                              | H <sub>2</sub> O<br>(→Q57, β-N) | Y67,<br>Ar-OH | E63,<br>δ-O | Notes     |
|-------|---------------------------------------------------------------------------------------------------------|--------------|-----------------------------------|-------------|---------------------------------|----------------------------------------|--------------------------------------------------------------|---------------------------------|---------------|-------------|-----------|
| 4     | 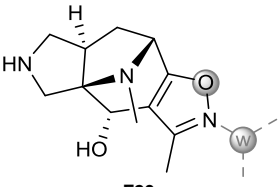<br>F20                | 3.0          | 2.8<br>[& C106, α-N]              |             | 2.7                             |                                        |                                                              |                                 |               |             |           |
| 5     | <br>ent-24 (≡ ent-F39) | 3.0          | 2.8<br>[& C106, α-N]              | 3.2         |                                 | 2.6, 2.6<br>[& →Q57, β-O;<br>P58, β-O] | 3.1<br>[& → R53, I54<br>and Q57, β-O;<br>& A56, Q57,<br>α-N] | 3.4<br>[& →I54, β-O]            |               |             |           |
| 6     | <br>ent-25 (≡ ent-F48) | 3.0          | 2.7<br>[& C106, α-N]              |             |                                 | 2.7<br>[& →Q57, β-O]                   |                                                              |                                 |               | 2.5         | ATAD2 hit |
| 7     | <br>F29               | 3.0          | 2.2<br>[& C106, α-N]              | 3.2         |                                 |                                        |                                                              |                                 |               |             |           |

| Entry | Ligand Structure                                                                                       | N110,<br>α-N | H <sub>2</sub> O<br>(→Y67, Ar-OH) | I54,<br>β-O | H <sub>2</sub> O<br>(→I54, β-O) | H <sub>2</sub> O<br>(→P58, β-O) | H <sub>2</sub> O<br>(→Q57, α-N) | H <sub>2</sub> O<br>(→Q57, β-N) | Y67,<br>Ar-OH | E63,<br>δ-O | Notes |
|-------|--------------------------------------------------------------------------------------------------------|--------------|-----------------------------------|-------------|---------------------------------|---------------------------------|---------------------------------|---------------------------------|---------------|-------------|-------|
| 8     | 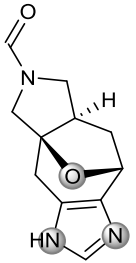<br><b>23 (≡ F31)</b> | 2.8          |                                   | 3.3         |                                 |                                 |                                 |                                 | 2.9           |             |       |

**Supplementary Table 4** Summary interactions between two fragment hits based on the natural product-like scaffolds and JMJD2D, identified using high-throughput X-ray crystallography.

| Entry | Ligand Structure                                                                                               | S308,<br>β-OH | E224,<br>δ-O | P217,<br>β-O | H <sub>2</sub> O<br>(→D197, γ-O)         |
|-------|----------------------------------------------------------------------------------------------------------------|---------------|--------------|--------------|------------------------------------------|
| 1     | 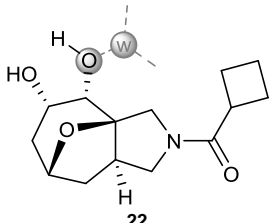 <p><b>22</b></p>            |               |              |              | 2.5<br>[→Y303, β-O]                      |
| 2     |  <p><i>ent</i>-<b>F8</b></p> | 2.7           | 3.4          | 3.2          | 2.7, 3.5<br>[& →R41, ζ-NH <sub>2</sub> ] |

#### 4.0 Computational analysis of fragments and scaffolds

Natural product likeness scores<sup>S6</sup> were calculated using the implementation in RDKit v2015.09.2 (Greg Landrum; Open Source Cheminformatics; <http://www.rdkit.org>; last accessed 27/04/2016).

For the preparation of Figure 2, databases of commercially available screening compounds were downloaded and filtered for  $13 \leq \text{heavy atoms} \leq 19$  before comparison with the fragments. The databases used were:

- a) BIONET – Fragments from Nature (128 compounds; <http://www.keyorganics.net/downloads/>; downloaded 24/08/2016).
- b) The Enamine General Fragment Library (12,486 compounds; [http://www.enamine.net/index.php?option=com\\_content&task=view&id=11](http://www.enamine.net/index.php?option=com_content&task=view&id=11); downloaded 17/03/2016).

For the preparation of Supporting Figure 2, the following two libraries were used for comparison with the scaffolds:

- a) The AnalytiCon MEGx Library (4460 natural product screening compounds from plants and microorganisms; <http://www.ac-discovery.com/content/Products&Technologies/MEGAbolite.php>; downloaded 17/03/2016).
- b) The Enamine Advanced Collection (278,365 compounds; [http://www.enamine.net/index.php?option=com\\_content&task=view&id=11](http://www.enamine.net/index.php?option=com_content&task=view&id=11); downloaded 17/03/2016).

#### 4.1 Molecular properties and natural product-likeness scores of the fragments

| Entry | Fragment No. | Fragment                                                                            | Natural product-likeness score | AlogP | HA | RMM /Da |
|-------|--------------|-------------------------------------------------------------------------------------|--------------------------------|-------|----|---------|
| 1     | F1           | 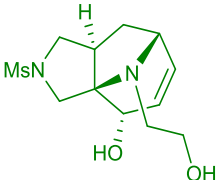   | 0.28                           | -0.93 | 19 | 288.363 |
| 2     | F2           |    | 0.28                           | -0.93 | 19 | 288.363 |
| 3     | F3           |    | 0.34                           | -0.82 | 18 | 251.325 |
| 4     | F4           |   | 1.8                            | -0.89 | 18 | 259.299 |
| 5     | F5           |  | 1.7                            | -0.09 | 17 | 238.283 |
| 6     | F6           |  | 2.1                            | -0.41 | 16 | 224.256 |
| 7     | F7           |  | 1.9                            | 0.3   | 17 | 238.283 |
| 8     | F8           |  | 1.4                            | -0.14 | 18 | 252.266 |

| Entry | Fragment No. | Fragment                                                                            | Natural product-likeness score | AlogP | HA | RMM /Da |
|-------|--------------|-------------------------------------------------------------------------------------|--------------------------------|-------|----|---------|
| 9     | F9           | 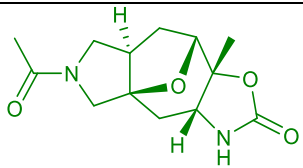   | 1.7                            | -0.26 | 19 | 266.293 |
| 10    | F10          |    | 0.28                           | 0.27  | 19 | 261.276 |
| 11    | F11          |    | 0.92                           | -0.03 | 15 | 203.24  |
| 12    | F12          |    | 1.5                            | 0.21  | 17 | 239.311 |
| 13    | F13          |   | 1.8                            | 0.02  | 16 | 226.315 |
| 14    | F14          |  | 1.9                            | -0.96 | 16 | 226.272 |
| 15    | F15          |  | 1.6                            | -0.68 | 17 | 240.299 |
| 16    | F16          |  | 0.6                            | 1.48  | 19 | 253.299 |
| 17    | F17          |  | 0.81                           | 1.05  | 19 | 300.298 |
| 18    | F18          |  | 1.2                            | 0.82  | 15 | 208.3   |

| Entry | Fragment No. | Fragment                                                                            | Natural product-likeness score | AlogP | HA | RMM /Da |
|-------|--------------|-------------------------------------------------------------------------------------|--------------------------------|-------|----|---------|
| 19    | F19          | 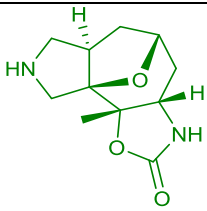   | 1.9                            | -0.21 | 16 | 224.256 |
| 20    | F20          |    | 0.33                           | -0.31 | 17 | 235.282 |
| 21    | F21          |    | -0.067                         | 0.96  | 19 | 263.335 |
| 22    | F22          |    | 0.2                            | -0.47 | 19 | 263.292 |
| 23    | F23          |   | 0.88                           | -1.33 | 16 | 221.256 |
| 24    | F24          |  | 0.9                            | 1.25  | 19 | 254.327 |
| 25    | F25          |  | 1.3                            | 0.35  | 18 | 244.332 |
| 26    | F26          |  | 0.74                           | 0.74  | 17 | 243.342 |
| 27    | F27          |  | -0.2                           | 0.44  | 19 | 284.375 |

| Entry | Fragment No. | Fragment                                                                            | Natural product-likeness score | AlogP | HA | RMM /Da |
|-------|--------------|-------------------------------------------------------------------------------------|--------------------------------|-------|----|---------|
| 28    | F28          | 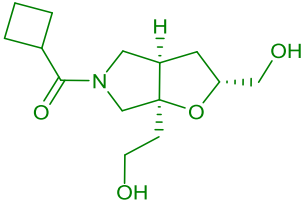   | 0.4                            | 0.05  | 19 | 269.337 |
| 29    | F29          |    | 0.74                           | -0.16 | 14 | 191.23  |
| 30    | F30          |    | 0.16                           | 0.74  | 16 | 219.283 |
| 31    | F31          |    | 0.48                           | -0.7  | 16 | 219.24  |
| 32    | F32          |   | 0.19                           | -0.28 | 17 | 233.266 |
| 33    | F33          |  | 0.1                            | 0.02  | 18 | 249.266 |
| 34    | F34          |  | -0.42                          | 0.01  | 19 | 262.308 |
| 35    | F35          |  | 1.9                            | -1.27 | 15 | 209.288 |
| 36    | F36          |  | 1.9                            | -1.27 | 15 | 209.288 |
| 37    | F37          |  | 0.49                           | 1.41  | 19 | 253.299 |
| 38    | F38          |  | 2.0                            | -1.35 | 16 | 227.257 |



| Entry | Fragment No. | Fragment                                                                            | Natural product-likeness score | AlogP | HA | RMM /Da |
|-------|--------------|-------------------------------------------------------------------------------------|--------------------------------|-------|----|---------|
| 39    | F39          | 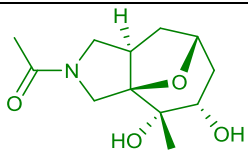   | 1.7                            | -0.79 | 17 | 241.284 |
| 40    | F40          |    | 2.7                            | -1.24 | 13 | 185.22  |
| 41    | F41          |    | 1.5                            | 0.34  | 17 | 241.327 |
| 42    | F42          |    | 0.47                           | 0     | 19 | 282.359 |
| 43    | F43          |   | 1.1                            | -0.14 | 19 | 267.321 |
| 44    | F44          |  | 0.69                           | 0.1   | 19 | 262.304 |
| 45    | F45          |  | 0.54                           | 0.14  | 16 | 217.267 |
| 46    | F46          |  | 0.032                          | 1.35  | 18 | 245.32  |
| 47    | F47          |  | 0.32                           | -0.56 | 18 | 245.277 |
| 48    | F48          |  | 0.066                          | 0.35  | 19 | 259.304 |

| Entry | Fragment No. | Fragment | Natural product-likeness score | AlogP | HA | RMM /Da |
|-------|--------------|----------|--------------------------------|-------|----|---------|
| 49    | F49          |          | -0.0083                        | 0.02  | 19 | 260.292 |
| 50    | F50          |          | 1.3                            | 0.35  | 18 | 244.332 |
| 51    | F51          |          | 0.8                            | 0.35  | 19 | 262.323 |
| 52    | F52          |          | 0.8                            | 0.35  | 19 | 262.323 |

## 4.2 Natural product-likeness scores of the deprotected scaffolds

| Entry | Scaffold No. | Scaffold (deprotected)                                                              | Natural product-likeness score |
|-------|--------------|-------------------------------------------------------------------------------------|--------------------------------|
| 1     | 3            | 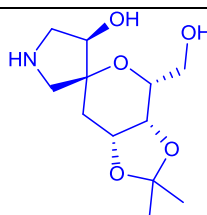   | 1.8                            |
| 2     | 4            |    | 1.6                            |
| 3     | 5            |    | 0.39                           |
| 4     | 6            |   | 2.1                            |
| 5     | 7            |  | 1.7                            |
| 6     | 8            |  | 2.1                            |
| 7     | 9            |  | 0.92                           |
| 8     | 10           |  | 0.33                           |
| 9     | 11           |  | 0.52                           |
| 10    | 12           |  | 1.5                            |

|    |               |                                                                                     |      |
|----|---------------|-------------------------------------------------------------------------------------|------|
| 11 | <b>13</b>     | 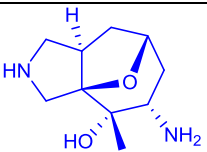   | 2.0  |
| 12 | <b>14</b>     |    | 0.6  |
| 13 | <b>15</b>     |    | 2.0  |
| 14 | <b>16</b>     |    | 1.9  |
| 15 | <b>17</b>     |   | 0.33 |
| 16 | <b>18</b>     |  | 0.88 |
| 17 | <b>19</b>     |  | 0.9  |
| 18 | <b>20/S33</b> |  | 1.3  |
| 19 | <b>S13</b>    |  | 2.7  |
| 20 | <b>S16</b>    |  | 0.74 |

|    |                |                                                                                     |      |
|----|----------------|-------------------------------------------------------------------------------------|------|
| 21 | <b>S19</b>     | 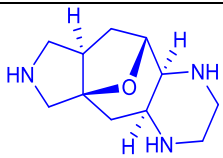   | 1.9  |
| 22 | <b>S20</b>     |    | 1.9  |
| 23 | <b>S21</b>     |    | 0.49 |
| 24 | <b>S24</b>     |    | 2.5  |
| 25 | <b>S25</b>     |    | 2.7  |
| 26 | <b>S27</b>     |   | 0.54 |
| 27 | <b>S32/S34</b> |  | 1.3  |
| 28 | <b>S35</b>     |  | 1.6  |

### 4.3 Summary of natural product-likeness scores of the fragments and scaffolds

After scoring the libraries, the data was sorted in bins of 0.5 increments (i.e.  $-5 \leq NP < -4.5$ ,  $-4.5 \leq NP < -4$ , etc.). Below are the tables of the binned results for each library.

| Bin                 | Fragments |          | Scaffolds |          |
|---------------------|-----------|----------|-----------|----------|
|                     | Frequency | Fraction | Frequency | Fraction |
| $-5 \leq NP < -4.5$ | 0         | 0        | 0         | 0        |
| $-4.5 \leq NP < -4$ | 0         | 0        | 0         | 0        |
| $-4 \leq NP < -3.5$ | 0         | 0        | 0         | 0        |
| $-3.5 \leq NP < -3$ | 0         | 0        | 0         | 0        |
| $-3 \leq NP < -2.5$ | 0         | 0        | 0         | 0        |
| $-2.5 \leq NP < -2$ | 0         | 0        | 0         | 0        |
| $-2 \leq NP < -1.5$ | 0         | 0        | 0         | 0        |
| $-1.5 \leq NP < -1$ | 0         | 0        | 0         | 0        |
| $-1 \leq NP < -0.5$ | 0         | 0        | 0         | 0        |
| $-0.5 \leq NP < -0$ | 0         | 0        | 0         | 0        |
| $0 \leq NP < 0.5$   | 3         | 0.074074 | 0         | 0        |
| $0.5 \leq NP < 1$   | 17        | 0.314815 | 4         | 0.133333 |
| $1 \leq NP < 1.5$   | 11        | 0.203704 | 7         | 0.233333 |
| $1.5 \leq NP < 2$   | 6         | 0.12963  | 2         | 0.1      |
| $2 \leq NP < 2.5$   | 13        | 0.240741 | 10        | 0.333333 |
| $2.5 \leq NP < 3$   | 1         | 0.018519 | 2         | 0.1      |
| $3 \leq NP < 3.5$   | 1         | 0.018519 | 3         | 0.1      |
| $3.5 \leq NP < 4$   | 0         | 0        | 0         | 0        |
| $4 \leq NP < 4.5$   | 0         | 0        | 0         | 0        |
| $4.5 \leq NP < 5$   | 0         | 0        | 0         | 0        |
| <b>SUM</b>          | <b>52</b> | <b>1</b> | <b>28</b> | <b>1</b> |

### 4.4 Natural product-likeness scores of commercial libraries

| Bin                 | BIONET – Fragments from Nature |          |
|---------------------|--------------------------------|----------|
|                     | Frequency                      | Fraction |
| $-5 \leq NP < -4.5$ | 0                              | 0        |
| $-4.5 \leq NP < -4$ | 0                              | 0        |
| $-4 \leq NP < -3.5$ | 0                              | 0        |
| $-3.5 \leq NP < -3$ | 0                              | 0        |
| $-3 \leq NP < -2.5$ | 0                              | 0        |
| $-2.5 \leq NP < -2$ | 0                              | 0        |
| $-2 \leq NP < -1.5$ | 0                              | 0        |
| $-1.5 \leq NP < -1$ | 3                              | 0.023438 |
| $-1 \leq NP < -0.5$ | 21                             | 0.164063 |
| $-0.5 \leq NP < -0$ | 33                             | 0.257813 |
| $0 \leq NP < 0.5$   | 30                             | 0.234375 |
| $0.5 \leq NP < 1$   | 22                             | 0.171875 |
| $1 \leq NP < 1.5$   | 13                             | 0.101563 |
| $1.5 \leq NP < 2$   | 6                              | 0.046875 |
| $2 \leq NP < 2.5$   | 0                              | 0        |

| Bin               | BIONET – Fragments from Nature |          |
|-------------------|--------------------------------|----------|
|                   | Frequency                      | Fraction |
| $2.5 \leq NP < 3$ | 0                              | 0        |
| $3 \leq NP < 3.5$ | 0                              | 0        |
| $3.5 \leq NP < 4$ | 0                              | 0        |
| $4 \leq NP < 4.5$ | 0                              | 0        |
| $4.5 \leq NP < 5$ | 0                              | 0        |
| <b>SUM</b>        | <b>128</b>                     | <b>1</b> |

| Bin                 | Enamine General Fragment Library |          |
|---------------------|----------------------------------|----------|
|                     | Frequency                        | Fraction |
| $-5 \leq NP < -4.5$ | 0                                | 0        |
| $-4.5 \leq NP < -4$ | 0                                | 0        |
| $-4 \leq NP < -3.5$ | 0                                | 0        |
| $-3.5 \leq NP < -3$ | 11                               | 0.000881 |
| $-3 \leq NP < -2.5$ | 166                              | 0.013295 |
| $-2.5 \leq NP < -2$ | 942                              | 0.075444 |
| $-2 \leq NP < -1.5$ | 2213                             | 0.177239 |
| $-1.5 \leq NP < -1$ | 3086                             | 0.247157 |
| $-1 \leq NP < -0.5$ | 2394                             | 0.191735 |
| $-0.5 \leq NP < -0$ | 1836                             | 0.147045 |
| $0 \leq NP < 0.5$   | 1076                             | 0.086177 |
| $0.5 \leq NP < 1$   | 564                              | 0.045171 |
| $1 \leq NP < 1.5$   | 176                              | 0.014096 |
| $1.5 \leq NP < 2$   | 18                               | 0.001442 |
| $2 \leq NP < 2.5$   | 4                                | 0.00032  |
| $2.5 \leq NP < 3$   | 0                                | 0        |
| $3 \leq NP < 3.5$   | 0                                | 0        |
| $3.5 \leq NP < 4$   | 0                                | 0        |
| $4 \leq NP < 4.5$   | 0                                | 0        |
| $4.5 \leq NP < 5$   | 0                                | 0        |
| <b>SUM</b>          | <b>12486</b>                     | <b>1</b> |

| Bin                 | AnalytiCon MEGx Library |          |
|---------------------|-------------------------|----------|
|                     | Frequency               | Fraction |
| $-5 \leq NP < -4.5$ | 0                       | 0        |
| $-4.5 \leq NP < -4$ | 0                       | 0        |
| $-4 \leq NP < -3.5$ | 0                       | 0        |
| $-3.5 \leq NP < -3$ | 0                       | 0        |
| $-3 \leq NP < -2.5$ | 0                       | 0        |
| $-2.5 \leq NP < -2$ | 0                       | 0        |
| $-2 \leq NP < -1.5$ | 0                       | 0        |
| $-1.5 \leq NP < -1$ | 1                       | 0.000224 |
| $-1 \leq NP < -0.5$ | 1                       | 0.000224 |
| $-0.5 \leq NP < -0$ | 14                      | 0.003139 |
| $0 \leq NP < 0.5$   | 53                      | 0.011883 |
| $0.5 \leq NP < 1$   | 174                     | 0.039013 |
| $1 \leq NP < 1.5$   | 424                     | 0.095067 |
| $1.5 \leq NP < 2$   | 688                     | 0.15426  |
| $2 \leq NP < 2.5$   | 1111                    | 0.249103 |

| Bin               | AnalytiCon MEGx Library |          |
|-------------------|-------------------------|----------|
|                   | Frequency               | Fraction |
| $2.5 \leq NP < 3$ | 923                     | 0.206951 |
| $3 \leq NP < 3.5$ | 645                     | 0.144619 |
| $3.5 \leq NP < 4$ | 372                     | 0.083408 |
| $4 \leq NP < 4.5$ | 54                      | 0.012108 |
| $4.5 \leq NP < 5$ | 0                       | 0        |
| <b>SUM</b>        | <b>4460</b>             | <b>1</b> |

| Bin                 | Enamine Advanced Collection |             |
|---------------------|-----------------------------|-------------|
|                     | Frequency                   | Fraction    |
| $-5 \leq NP < -4.5$ | 0                           | 0           |
| $-4.5 \leq NP < -4$ | 0                           | 0           |
| $-4 \leq NP < -3.5$ | 14                          | 5.02937E-05 |
| $-3.5 \leq NP < -3$ | 264                         | 0.000948395 |
| $-3 \leq NP < -2.5$ | 3039                        | 0.010917321 |
| $-2.5 \leq NP < -2$ | 19398                       | 0.069685485 |
| $-2 \leq NP < -1.5$ | 57552                       | 0.20675013  |
| $-1.5 \leq NP < -1$ | 85558                       | 0.307359043 |
| $-1 \leq NP < -0.5$ | 68775                       | 0.247067699 |
| $-0.5 \leq NP < -0$ | 31687                       | 0.113832558 |
| $0 \leq NP < 0.5$   | 9482                        | 0.03406319  |
| $0.5 \leq NP < 1$   | 2057                        | 0.007389578 |
| $1 \leq NP < 1.5$   | 421                         | 0.001512403 |
| $1.5 \leq NP < 2$   | 82                          | 0.000294577 |
| $2 \leq NP < 2.5$   | 26                          | 9.34025E-05 |
| $2.5 \leq NP < 3$   | 7                           | 2.51468E-05 |
| $3 \leq NP < 3.5$   | 2                           | 7.18481E-06 |
| $3.5 \leq NP < 4$   | 0                           | 0           |
| $4 \leq NP < 4.5$   | 1                           | 3.59241E-06 |
| $4.5 \leq NP < 5$   | 0                           | 0           |
| <b>SUM</b>          | <b>278365</b>               | <b>1</b>    |



## 5.0 Experimental

### 5.1 General experimental

All non-aqueous reactions were performed under an atmosphere of nitrogen unless otherwise stated. Water-sensitive reactions were performed in oven-dried glassware, cooled under nitrogen before use. THF, CH<sub>2</sub>Cl<sub>2</sub>, PhMe and MeCN were dried and purified by means of a Pure Solv MD solvent purification system (Innovative Technology Inc.). Anhydrous DMF was obtained in a SureSeal bottle from Sigma-Aldrich. All other solvents used were of chromatography or analytical grade. Petrol refers to petroleum spirit (b.p. 40-60 °C). Commercially available starting materials were obtained from Sigma-Aldrich, Fluka, Acros, Alfa Aesar or Fluorochem and were used without purification.

Thin layer chromatography (TLC) was carried out on aluminium backed silica plates (Merck silica gel 60 F254). Visualisation of the plates was achieved using an ultraviolet lamp ( $\lambda_{\text{max}} = 254 \text{ nm}$ ) and KMnO<sub>4</sub>. Flash chromatography was carried out using silica gel 60 (60-63  $\mu\text{m}$  particles) supplied by Merck. Columns with solvent gradients were carried out using a Biotage Flashmaster II on pre-packed Redisep normal-phase silica or cyanosilica cartridges (as specified). Strong cation exchange solid phase extraction (SCX SPE) was carried out using pre-packed Discovery DSC-SCX cartridges supplied by Supelco, see the general procedure below.

Melting points were measured on a Reichert hot stage apparatus and are uncorrected. Infrared spectra were recorded on a Bruker Alpha Platinum-ATR, with absorption reported in wavenumbers ( $\text{cm}^{-1}$ ). High resolution mass spectra (HRMS) were recorded on a Bruker MaXis Impact spectrometer with electrospray ionisation (ESI) source. Low resolution mass spectra (LRMS) were recorded by HP-LCMS, which was generally carried out on an Agilent 1200 series LC system comprising a Bruker HCT Ultra ion trap mass spectrometer. The solvent system used was CH<sub>3</sub>CN/H<sub>2</sub>O + 0.1% formic acid with a Phenomenex Luna C18 50  $\times$  2 mm 5 micron column.

Proton (<sup>1</sup>H) and carbon (<sup>13</sup>C) NMR spectral data were collected on Bruker Advance 500, Bruker DPX500, Bruker Advance 400 and Bruker DPX300 spectrometers. Chemical shifts ( $\delta$ ) are quoted in parts per million (ppm) and referenced to the residual solvent peak. Coupling constants ( $J$ ) are quoted in Hertz (Hz) and splitting patterns reported in an abbreviated manner: app. (apparent), s (singlet), d (doublet), t (triplet), q (quartet), m (multiplet). All fully characterised products were assigned with the aid of COSY, DEPT-135 and HMQC experiments. Where stated HMBC and NOESY experiments were also used to aid assignments. Compounds are numbered with respect to their IUPAC names. Where necessary, coloured text was used to distinguish similar protons and carbons. Diastereomeric ratios were calculated by analysis of the <sup>1</sup>H NMR spectra and

diastereomers were assigned through the interpretation of coupling constants, NOESY spectra, and through small molecule crystallographic studies. Small molecule X-ray crystallography studies were performed by Dr Christopher Pask.

## 5.2 General procedures

### General procedure A: Strong cation exchange solid phase extraction (SCX SPE)

TfOH (0.5 M in MeOH, 10 mL / 5 g SCX SPE) was dripped through the SCX SPE cartridge prior to use. MeOH (20 mL) was then flushed through using pressurised air. The crude residue (3.5 mmol / 5 g SCX SPE silica) was loaded in the minimum amount of MeOH. The cartridge was flushed with MeOH and the fractions were collected and monitored by TLC. The cartridge was then flushed with sat. NH<sub>3</sub>/MeOH and the fractions were collected and monitored by TLC. Fractions containing product were combined and concentrated.

### General Procedure B: Hydrogenation catalysed by Pd/C or Pd(OH)<sub>2</sub>/C

The substrate (1.0 eq.) was dissolved in MeOH or EtOH (~20 mL g<sup>-1</sup>) and added *via* syringe to a round-bottomed flask containing 10 wt% Pd/C (% w/w as specified) or 20 wt% Pd(OH)<sub>2</sub>/C (% w/w as specified) pre-submerged in minimal solvent (MeOH or EtOH) under N<sub>2</sub>. If required, conc. HCl (~12 M) was added as specified. The head space of the flask was exposed to a sequence of vacuum/H<sub>2</sub> flushes (×3), then exposed to an atmosphere of H<sub>2</sub> (balloon). The reaction was monitored by TLC until complete. At this point the balloon was removed and the reaction mixture was fitted with a gas outlet (wide bore syringe needle) and purged with N<sub>2</sub> for 5 minutes. The reaction mixture was filtered through Celite eluting with MeOH, then concentrated *in vacuo*. The product was typically used in the next step without further purification.

### General procedure C: Reductive amination

NaBH(OAc)<sub>3</sub> (3.0 eq.) was added to a stirred solution of amine (1.0 eq.) and aldehyde (2.5-5.0 eq., as specified) in CH<sub>2</sub>Cl<sub>2</sub> (0.2 M). The reaction mixture was stirred at rt (unless otherwise specified) for 15 h, then flushed through a pad of Celite eluting with CH<sub>2</sub>Cl<sub>2</sub> and concentrated *in vacuo*. Products were purified by flash chromatography.

#### **General procedure D: N-Formylation**

Ac<sub>2</sub>O (10-30 eq., as specified) was added to a stirred solution of amine (1.0 eq.) in 30:70 CH<sub>2</sub>Cl<sub>2</sub>–HCO<sub>2</sub>H acid (0.1 M). The reaction mixture was stirred at rt for 1 h, then concentrated *in vacuo*. Products were purified by flash chromatography.

#### **General procedure E: N-Acylation**

Ac<sub>2</sub>O (2.0 eq.) was added to a stirred solution of substrate (1.0 eq.) and Et<sub>3</sub>N (3.0 eq.) in CH<sub>2</sub>Cl<sub>2</sub> (0.2 M) at 0 °C. The reaction mixture was warmed to rt, stirred for 1 h, then concentrated *in vacuo*. Products were purified by flash chromatography.

#### **General procedure F: Methyl carbamate formation**

Methyl chloroformate (10 eq.) was added to a stirred solution of amine (1.0 eq.) and Et<sub>3</sub>N (10 eq.) in CH<sub>2</sub>Cl<sub>2</sub> (0.1 M) at 0 °C. The reaction mixture was warmed to rt and stirred for 1 h. The reaction mixture was concentrated *in vacuo*. Products were purified by SCX SPE or flash chromatography.

#### **General procedure G: O-Silyl deprotection using (±)-camphorsulfonic acid**

(±)-Camphorsulfonic acid (4.0-10 eq., as specified) was added to a stirred suspension of amine (1.0 eq.) in MeOH (0.3 M). The reaction mixture heated at 45 °C for 15 h, then concentrated *in vacuo*. Products were purified by flash chromatography.

#### **General procedure H: O-Silyl deprotection using TBAF**

TBAF (1.0 M in THF, 2.0 eq.) was added a stirred solution of substrate (1.0 eq.) in THF (0.1 M). The reaction mixture was stirred for 0.5 h, then concentrated *in vacuo*. Products were purified by flash chromatography.

#### **General procedure I: Deprotection of *tert*-butylcarbamoyl (Boc) amines**

To a solution of Boc-amine (1.0 eq.) in CH<sub>2</sub>Cl<sub>2</sub> (0.5 M) was added TFA (1 volume) and the resulting solution was stirred at rt for 1 h then concentrated *in vacuo*. Products were purified by SCX SPE eluting with MeOH, then sat. NH<sub>3</sub>/MeOH.

### 5.3 A note on NMR assignments

Where compounds have been assigned through analysis of the corresponding NOESY spectrum, protons labelled 'A' are on the 'bottom' face of the molecules (as drawn), while protons labelled 'B' are on the 'top' face of the molecules (as drawn), see compound **S13** below as an example.

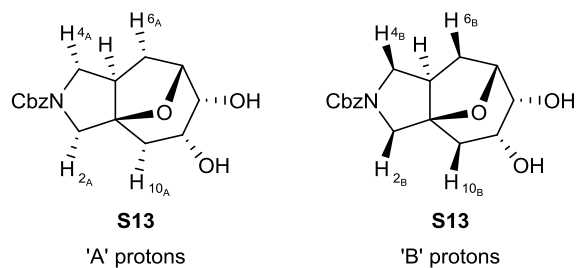

Where the polycyclic assemblies **were not** assigned using NOESY the 'A' and 'B' descriptors are reported through analysis of the coupling constants or otherwise arbitrarily.

## 5.4 Compound data

### 5.4.1 Preparation of cycloaddition precursors and cycloadducts

#### 5.4.1.1 Preparation of each intermediate in the synthesis of O-bridged cycloadduct 2a

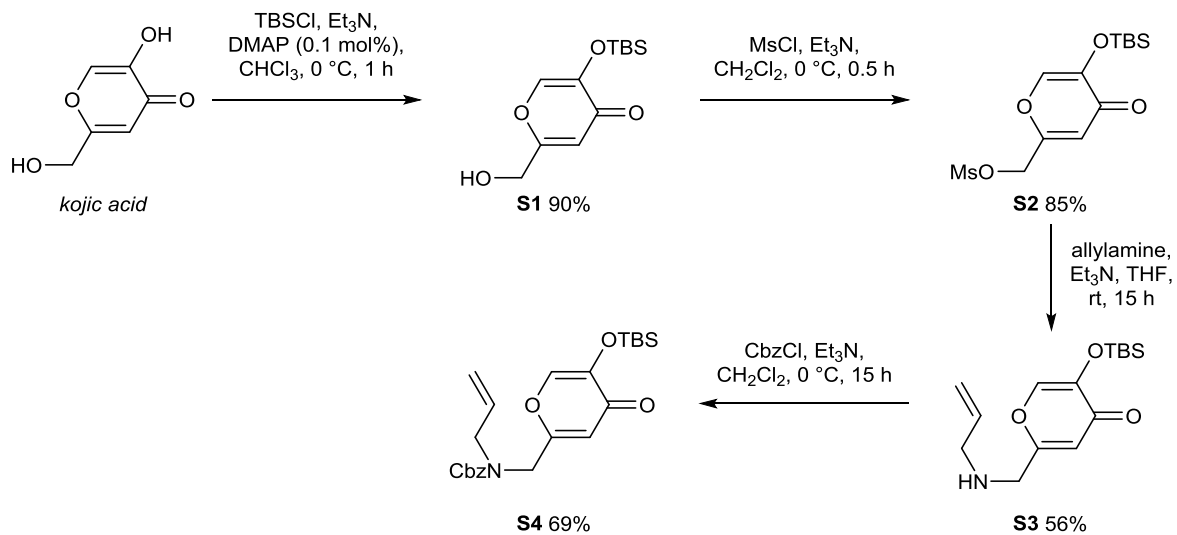

### 5-[(*tert*-Butyldimethylsilyl)oxy]-2-(hydroxymethyl)-4H-pyran-4-one **S1**

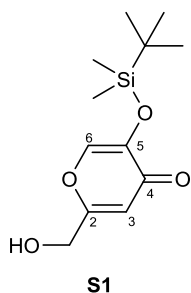

Following a procedure by Miyazaki,<sup>S7</sup> TBSCl (5.3 g, 35 mmol, 1.0 eq.) was added to a stirred suspension of kojic acid (5.0 g, 35 mmol, 1.0 eq.), Et<sub>3</sub>N (7.4 mL, 100 mmol, 2.90 eq.) and DMAP (5 mg, 0.04 mmol, 0.001 eq.) in CHCl<sub>3</sub> (50 mL) at 0 °C. The reaction mixture was stirred at this temperature for 1 h then aqueous KHSO<sub>4</sub> (5 wt%, 50 mL) was added. The phases were separated and the organic phase was washed with brine (50 mL), dried, filtered and concentrated *in vacuo*. Flash chromatography eluting with 1:1 pentane–EtOAc gave the title compound **S1** (8.1 g, 32 mmol, 90%) as a colourless amorphous solid.\* *R<sub>f</sub>* 0.57 (1:1 petrol–EtOAc). <sup>1</sup>H NMR (500 MHz, CDCl<sub>3</sub>): δ 7.65 (1H, s, 6-H), 6.47 (1H, s, 3-H), 4.46 (2H, d, *J* 6.3, CH<sub>2</sub>OH), 3.13 (1H, t, *J* 6.3, OH), 0.95 (9H, s, SiC(CH<sub>3</sub>)<sub>3</sub>), 0.21 (6H, s, 2 × SiCH<sub>3</sub>). <sup>13</sup>C NMR (125 MHz, CDCl<sub>3</sub>): δ 176.1 (4-C), 166.6 (2-C), 144.6 (5-C), 144.2 (6-C), 112.4 (3-C), 61.1 (CH<sub>2</sub>OH), 25.8 (SiC(CH<sub>3</sub>)<sub>3</sub>), 18.7 (SiC<sub>q</sub>), -4.4 (2 × SiCH<sub>3</sub>). IR *v*<sub>max</sub>(film)/cm<sup>-1</sup> 3358 (br., OH), 2954, 2857, 1651 (CO), 1629, 1268, 1211, 874. LRMS (HPLC-MS): C<sub>12</sub>H<sub>21</sub>O<sub>4</sub>Si; found 257.1 [M+H]<sup>+</sup>. Spectral data are consistent with the literature values.<sup>S8</sup>

### {5-[(*tert*-Butyldimethylsilyl)oxy]-4-oxo-4H-pyran-2-yl}methyl methanesulfonate **S2**

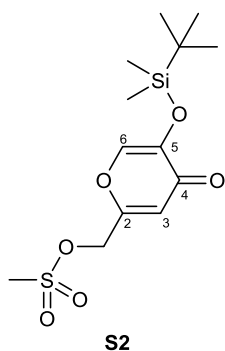

Et<sub>3</sub>N (3.30 mL, 23.4 mmol, 2.00 eq.) was added to a stirred solution of silyl protected kojic acid **S1** (3.00 g, 11.7 mmol, 1.00 eq.) in CH<sub>2</sub>Cl<sub>2</sub> (24 mL). The reaction mixture was cooled to 0 °C, then methanesulfonyl chloride (1.1 mL, 14 mmol, 1.2 eq.) was added dropwise. The reaction mixture was stirred at 0 °C for 0.5 h, then warmed to rt and partitioned with H<sub>2</sub>O (25 mL). The phases were separated and the aqueous phase was extracted with CH<sub>2</sub>Cl<sub>2</sub> (25 mL). The combined organic phases were dried over MgSO<sub>4</sub>, filtered and concentrated *in vacuo* to give the *title compound* **S2** (3.31 g, 9.89 mmol, 85% mass recovery) which was used subsequently without further purification. *R<sub>f</sub>* 0.62 (1:1 petrol–EtOAc). <sup>1</sup>H NMR (300 MHz, CDCl<sub>3</sub>, characteristic peaks): δ 7.69 (1H, s, 6-H), 6.48 (1H, s, 3-H), 4.97 (2H, s, CH<sub>2</sub>), 3.11 (3H, s, SO<sub>2</sub>CH<sub>3</sub>), 0.95 (9H, s, SiC(CH<sub>3</sub>)<sub>3</sub>), 0.23 (6H, s, 2 × SiCH<sub>3</sub>).

\* Compound **S1** and related silylated pyranone derivatives **S2–S6** slowly decomposed on standing in air or in mildly acidic solvents (e.g. CDCl<sub>3</sub>). Compounds of this type should be stored in a freezer at -18 °C. N.b. derived cycloadducts **2a–c** were bench stable at rt for several weeks.

### 5-[(*tert*-Butyldimethylsilyl)oxy]-2-[[(*prop*-2-en-1-yl)amino]methyl]-4*H*-pyran-4-one **S3**

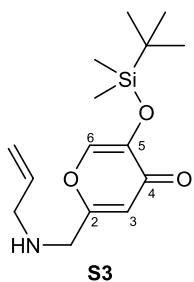

Et<sub>3</sub>N (3.5 mL, 35 mmol, 1.0 eq.) was added to a stirred solution of mesylate **S2** (11.8 g, 35 mmol, 1.0 eq.) in THF (120 mL). Allylamine (8.0 mL, 106 mmol, 3.0 eq.) was added and the reaction mixture was stirred for 15 h, then concentrated *in vacuo*. The resulting residue was diluted in EtOAc (50 mL) and washed with sat. aq. NaHCO<sub>3</sub> solution (50 mL). The phases were separated and the aqueous phase was extracted with EtOAc (50 mL). The combined organics were washed with brine

(50 mL), dried over MgSO<sub>4</sub>, filtered and concentrated *in vacuo*. The residue was washed through a pad of silica with 9:1 EtOAc–MeOH to give the *title compound* **S3** (5.9 g, 20.0 mmol, 56%) as a dark brown oil. *R*<sub>f</sub> 0.57 (1:1 petrol–EtOAc). <sup>1</sup>H NMR (500 MHz, CDCl<sub>3</sub>): δ 7.64 (1H, s, 6-H), 6.36 (1H, s, 3-H), 5.86 (1H, ddt, *J* 16.8, 10.3, 6.0, CH=CH<sub>2</sub>), 5.20 (1H, app. dq, *J* 16.8, 1.4, CH=CH<sub>A</sub>H<sub>B</sub>), 5.14 (1H, ddd, *J* 10.3, 2.7, 1.4, CH=CH<sub>A</sub>H<sub>B</sub>), 3.62 (2H, s, C<sub>q</sub>CH<sub>2</sub>NH), 3.27 (2H, dt, *J* 6.0, 1.4, NHCH<sub>2</sub>CH=CH<sub>2</sub>), 0.96 (9H, s, SiC(CH<sub>3</sub>)<sub>3</sub>), 0.23 (6H, s, 2 × SiCH<sub>3</sub>). <sup>13</sup>C NMR (125 MHz, CDCl<sub>3</sub>): δ 175.7 (4-C), 165.7 (2-C), 145.5 (5-C), 144.2 (6-C), 135.9 (CH=CH<sub>2</sub>), 117.1 (CH=CH<sub>2</sub>), 113.7 (3-C), 51.5 (CH<sub>2</sub>CH=CH<sub>2</sub>), 49.8 (C<sub>q</sub>CH<sub>2</sub>NH), 25.8 (SiC(CH<sub>3</sub>)<sub>3</sub>), 18.7 (SiC<sub>q</sub>), -4.3 (2 × SiCH<sub>3</sub>). IR *v*<sub>max</sub>(film)/cm<sup>-1</sup> 2954, 2930, 2857, 1651 (CO), 1232, 919, 879, 786. LRMS (HPLC-MS): C<sub>15</sub>H<sub>25</sub>NO<sub>3</sub>Si; found 296.1 [M+H]<sup>+</sup>.

### Benzyl *N*-({5-[(*tert*-butyldimethylsilyl)oxy]-4-oxo-4*H*-pyran-2-yl)methyl}-*N*-(*prop*-2-en-1-yl)carbamate **S4**

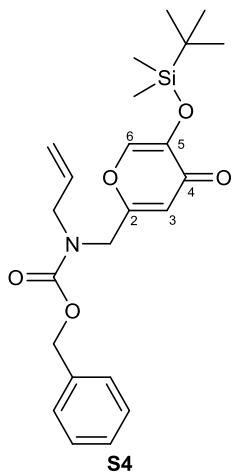

Benzyl chloroformate (180 μL, 1.28 mmol, 2.6 eq.) was added to a stirred solution of the amine **S3** (145 mg, 0.49 mmol, 1.0 eq.) and Et<sub>3</sub>N (180 μL, 1.28 mmol, 2.6 eq.) in CH<sub>2</sub>Cl<sub>2</sub> (5.0 mL) at 0 °C. The reaction mixture warmed to rt and stirred for 15 h, then concentrated *in vacuo*. Flash chromatography eluting with 9:1 EtOAc–MeOH gave the *title compound* **S4** (145 mg, 0.34 mmol, 69%) as a pale yellow oil. *R*<sub>f</sub> 0.82 (1:1 petrol–EtOAc). See Section 5.4.1.2 for the spectral data and optimised route to prepare this compound.

### 5.4.1.2 Telescoped synthesis of O-bridged cycloadducts 2a-b

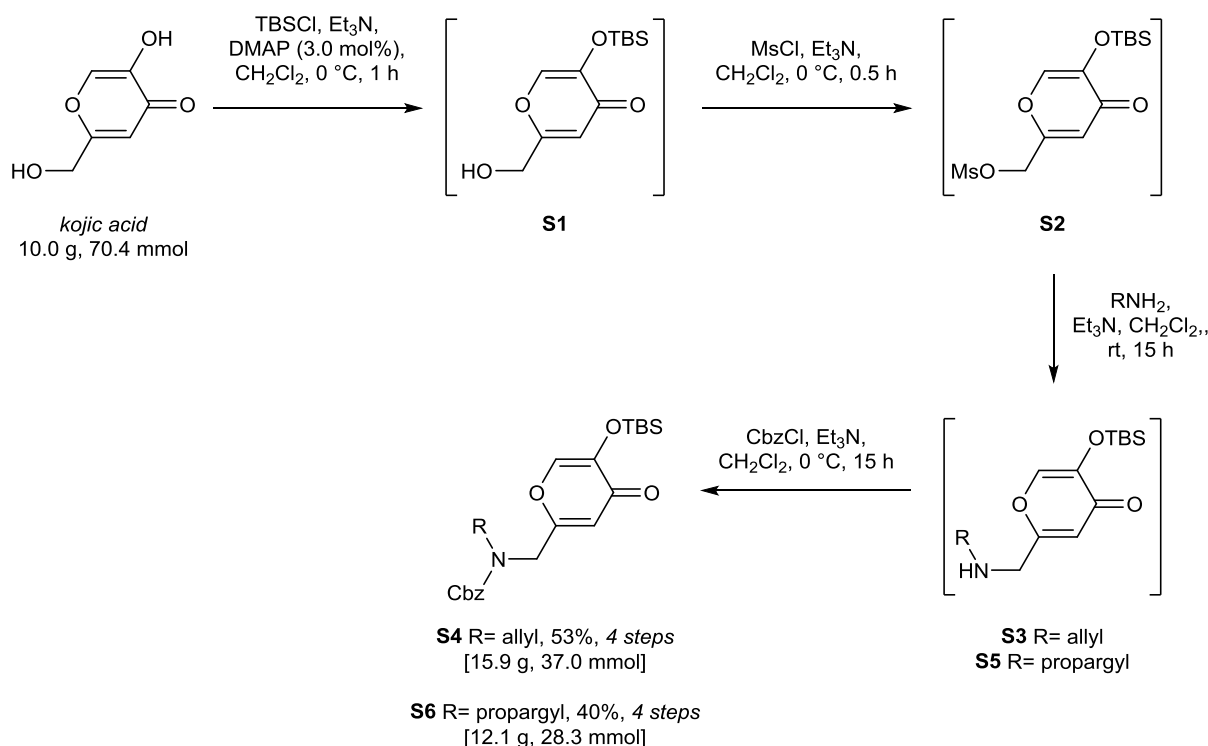

#### General procedure J: Four-step telescoped procedure to prepare cycloaddition precursors S4 and S6

TBSCl (10.7 g, 71.0 mmol, 1.01 eq.) was added to a stirred solution of kojic acid (10.0 g, 70.4 mmol, 1.00 eq.), Et<sub>3</sub>N (10.8 mL, 77.9 mmol, 1.10 eq.) and DMAP (258 mg, 2.11 mmol, 0.03 eq.) in CH<sub>2</sub>Cl<sub>2</sub> (150 mL) at 0 °C. The reaction mixture was warmed to rt and stirred for 45 min. The reaction mixture was quenched with sat. aq. NH<sub>4</sub>Cl solution (100 mL) and H<sub>2</sub>O (100 mL). After separation, the aqueous phase was extracted with CH<sub>2</sub>Cl<sub>2</sub> (2 × 150 mL). The organic extracts were combined, dried over Na<sub>2</sub>SO<sub>4</sub> and concentrated *in vacuo*. To the residue **S1** (70.4 mmol) in CH<sub>2</sub>Cl<sub>2</sub> (150 mL) at 0 °C was added Et<sub>3</sub>N (12.0 mL, 86.5 mmol, 1.23 eq.) and methanesulfonyl chloride (6.0 mL, 78 mmol, 1.1 eq.) dropwise. The reaction mixture was warmed to rt and stirred for 0.5 h, then quenched with water (150 mL). After phase separation, the aqueous phase was extracted using CH<sub>2</sub>Cl<sub>2</sub> (2 × 150 mL). The organic extracts were combined, dried over Na<sub>2</sub>SO<sub>4</sub> and concentrated *in vacuo*. To the residue **S2** (70.4 mmol) in CH<sub>2</sub>Cl<sub>2</sub> (150 mL) at 0 °C was added Et<sub>3</sub>N (10.0 mL, 72.0 mmol, 1.02 eq.) and amine (as specified below, 3.80 eq.). The reaction mixture warmed to rt, stirred for 15 h, then quenched with H<sub>2</sub>O (150 mL). After phase separation, the aqueous phase was extracted using CH<sub>2</sub>Cl<sub>2</sub> (2 × 150 mL). The organic extracts were combined, dried over Na<sub>2</sub>SO<sub>4</sub> and concentrated *in vacuo*. To the residue **S3** or **S5** (70.4 mmol) in CH<sub>2</sub>Cl<sub>2</sub> (150 mL) at 0 °C was added Et<sub>3</sub>N (17.0 mL, 121 mmol, [1.72 eq.]) followed by the very slow addition (*exothermic – gas outlet*



necessary!) of benzyl chloroformate (15.0 mL, 106 mmol, 1.50 eq.). The reaction mixture warmed to rt and stirred 2 h. The reaction mixture was quenched with sat. aq. NH<sub>4</sub>Cl solution (150 mL) and H<sub>2</sub>O (150 mL). After phase separation, the aqueous phase was extracted with CH<sub>2</sub>Cl<sub>2</sub> (2 × 150 mL). The organic extracts were combined, dried over Na<sub>2</sub>SO<sub>4</sub> and concentrated *in vacuo*.

### Benzyl *N*-({5-[(*tert*-butyldimethylsilyl)oxy]-4-oxo-4*H*-pyran-2-yl)methyl)-*N*-(prop-2-en-1-yl)carbamate **S4**

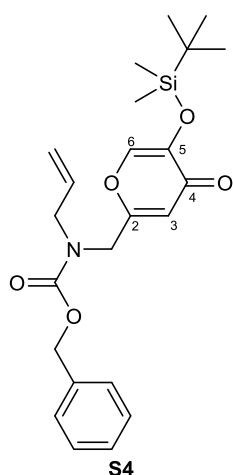

General procedure **J** was followed using kojic acid (10.0 g, 70.4 mmol, 1.00 eq) and allylamine (20.0 mL, 267 mmol, 3.80 eq.). Flash chromatography eluting with 9:1 to 8:2 pentane–EtOAc gave the *title compound S4* (15.9 g, 37.0 mmol, 53%, 4 steps) as a pale yellow oil. *R<sub>f</sub>* 0.82 (1:1 petrol–EtOAc). **<sup>1</sup>H NMR** (500 MHz, CDCl<sub>3</sub>, 330 K): δ 7.56 (1H, s, 6-H), 7.39-7.27 (5H, m, Cbz Ar-H), 6.23 (1H, s, 3-H), 5.81-5.70 (1H, m, CH=CH<sub>2</sub>), 5.21-5.10 (4H, m, CH=CH<sub>2</sub> and OCH<sub>2</sub>Ph), 4.26 (2H, s, C<sub>q</sub>CH<sub>2</sub>N), 3.96 (2H, s, NCH<sub>2</sub>CH=CH<sub>2</sub>), 0.97 (9H, s, SiC(CH<sub>3</sub>)<sub>3</sub>), 0.24 (6H, s, 2 × SiCH<sub>3</sub>). **<sup>13</sup>C NMR** (125 MHz, CDCl<sub>3</sub>, 330 K): δ 175.3 (4-C), 163.3 (2-C), 156.1 (N(CO)O), 145.8 (5-C), 144.0 (6-C), 136.5 (CH=CH<sub>2</sub>), 132.9 (Ar-C<sub>q</sub>), 128.7 (Ar-C), 128.4 (Ar-C), 128.2 (Ar-C), 118.2 (CH=CH<sub>2</sub>), 113.7 (3-C), 65.6 (OCH<sub>2</sub>Ph), 50.3 (CH<sub>2</sub>CH=CH<sub>2</sub>), 47.6 (C<sub>q</sub>CH<sub>2</sub>NH), 25.8 (SiC(CH<sub>3</sub>)<sub>3</sub>), 18.7 (SiC<sub>q</sub>), -4.3 (2 × SiCH<sub>3</sub>). **IR** *v*<sub>max</sub>(film)/cm<sup>-1</sup> 2953, 2929, 2857, 1702 (CO), 1649, 1460, 1410, 1210. **HRMS** (ESI): C<sub>23</sub>H<sub>32</sub>NO<sub>5</sub>Si [M+H]<sup>+</sup>; calculated 430.2058, found 430.2044.

### Benzyl *N*-({5-[(*tert*-butyldimethylsilyl)oxy]-4-oxo-4*H*-pyran-2-yl)methyl)-*N*-(prop-2-yn-1-yl)carbamate **S6**

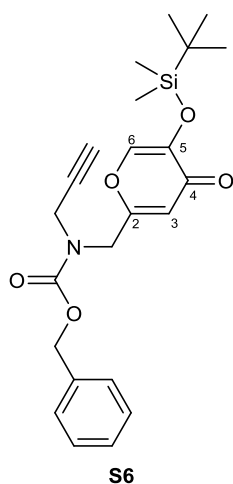

General procedure **J** was followed using kojic acid (10.0 g, 70.4 mmol, 1.00 eq) and propargylamine (17.0 mL, 267 mmol, 3.80 eq.).\* Flash chromatography eluting with 9:1 to 8:2 pentane–EtOAc gave the *title compound S6* (12.1 g, 28.3 mmol, 40%, 4 steps) as a pale yellow oil. *R<sub>f</sub>* 0.20 (4:1 petrol–EtOAc). **<sup>1</sup>H NMR** (500 MHz, CDCl<sub>3</sub>, 329 K): δ 7.57 (1H, s, 6-H), 7.38-7.29 (5H, m, Cbz Ar-H), 6.28 (1H, s, 3-H), 5.19 (2H, s, OCH<sub>2</sub>Ph), 4.42 (2H, s, C<sub>q</sub>CH<sub>2</sub>N), 4.18 (2H, br. s, NCH<sub>2</sub>C≡CH), 2.26 (1H, t, *J* 2.5, C≡CH), 0.97 (9H, s, SiC(CH<sub>3</sub>)<sub>3</sub>), 0.24 (6H, s, 2 × SiCH<sub>3</sub>). **<sup>13</sup>C NMR** (125 MHz, CDCl<sub>3</sub>, 329 K): δ 175.3 (4-C), 162.7 (2-C), 155.5 (N(CO)O), 145.9 (5-C), 144.0 (6-C), 136.2 (Ar-C<sub>q</sub>),

\* Crude amine **S5** characteristic <sup>1</sup>H NMR peaks (300 MHz, CDCl<sub>3</sub>): δ 7.65 (1H, s, 6-H), 6.39 (1H, s, 3-H), 3.73 (2H, s, C<sub>q</sub>CH<sub>2</sub>NH), 3.47 (2H, d, *J* 2.4, NHCH<sub>2</sub>C≡CH), 2.27 (1H, t, *J* 2.4, C≡CH), 0.95 (9H, s, SiC(CH<sub>3</sub>)<sub>3</sub>), 0.23 (6H, s, 2 × SiCH<sub>3</sub>).

128.8 (Ar-C), 128.5 (Ar-C), 128.3 (Ar-C), 114.0 (3-C), 78.1 (CH<sub>2</sub>C≡CH), 73.3 (CH<sub>2</sub>C≡CH), 68.5 (OCH<sub>2</sub>Ph), 47.5 (C<sub>q</sub>CH<sub>2</sub>N), 37.2 (CH<sub>2</sub>C≡CH), 25.9 (SiC(CH<sub>3</sub>)<sub>3</sub>), 18.7 (SiC<sub>q</sub>), -4.3 (2 × SiCH<sub>3</sub>). IR  $\nu_{\text{max}}$ (film)/cm<sup>-1</sup> 2953, 2930, 2857, 1708 (CO), 1650, 1498, 1455, 1216. HRMS (ESI): C<sub>23</sub>H<sub>30</sub>NO<sub>5</sub>Si [M+H]<sup>+</sup>; calculated 428.1888, found 428.1889.

### 5.4.1.3 Preparation of O-bridged cycloadducts **2a** and **2b**

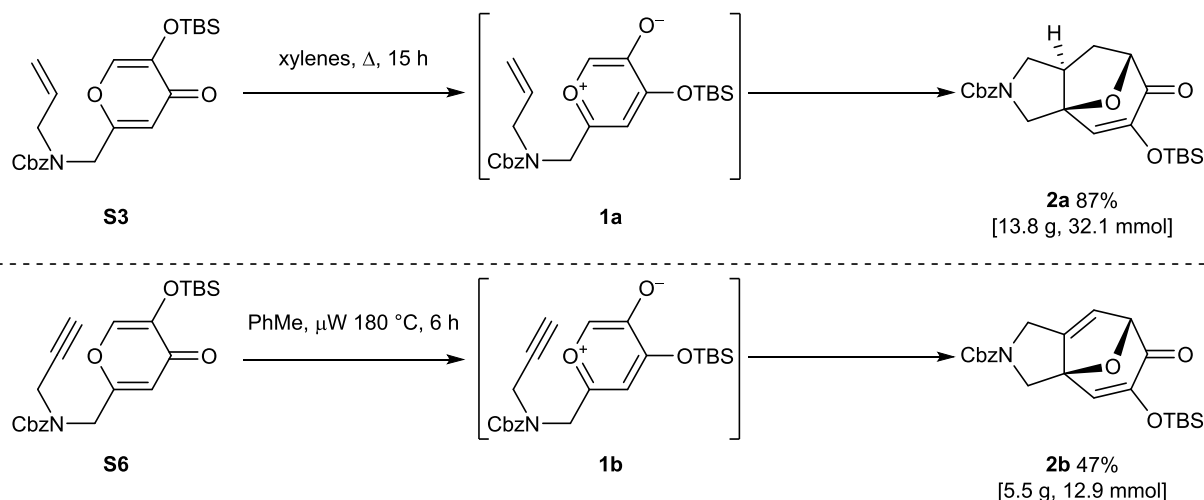

### Benzyl (1*R*\*,5*S*\*,7*S*\*)-9-[(tert-butyldimethylsilyl)oxy]-8-oxo-11-oxa-3-zatricyclo[5.3.1.0<sup>1,5</sup>]undec-9-ene-3-carboxylate **2a**

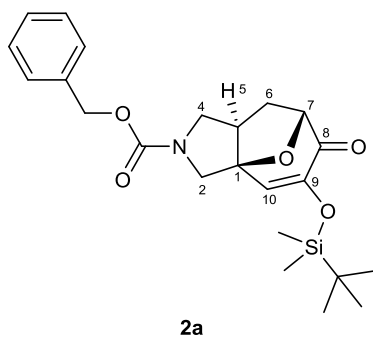

A stirred solution of compound **S3** (15.9 g, 37.0 mmol) in xylenes (36 mL) was heated to reflux (155 °C) and stirred for 15 h. The reaction mixture was cooled to rt then concentrated *in vacuo*. Flash chromatography eluting with 9:1 to 8:2 pentane–EtOAc gave the *title compound* **2a** (13.8 g, 32.1 mmol, 87%) as a colourless amorphous solid.\* **M.p.** 96–98 °C, colourless plates, hexane–EtOAc. **R<sub>f</sub>** 0.18 (4:1 petrol–EtOAc). **<sup>1</sup>H NMR** (500 MHz, CDCl<sub>3</sub>, 50:50 mixture of rotamers):  $\delta$  7.41–7.29 (5H, m, Cbz Ar-H), 6.29 (0.5H, s, 10-H), 6.26 (0.5H, s, 10-H), 5.15 (1H, app. d, *J* 12.0, OCH<sub>A</sub>H<sub>B</sub>Ph), 5.12 (1H, app. d, *J* 12.0, OCH<sub>A</sub>H<sub>B</sub>Ph), 4.78 (1H, d, *J* 8.2, 7-H), 4.04–3.90 (2H, m, 2-H<sub>B</sub> and 4-H<sub>A</sub>), 3.68 (0.5H, d, *J* 12.8, 2-H<sub>A</sub>), 3.64 (0.5H, d, *J* 12.8, 2-H<sub>A</sub>), 3.22–3.13 (1H, m, 4-H<sub>B</sub>), 2.84–2.74 (1H, m, 5-H), 2.34–2.21 (1H, m, 6-H<sub>B</sub>), 1.89 (1H, app. td, *J* 13.2, 8.2, 6-H<sub>A</sub>), 0.94 (4H, s, SiC(CH<sub>3</sub>)<sub>3</sub>), 0.93 (5H, s, SiC(CH<sub>3</sub>)<sub>3</sub>), 0.16 (6H, m, 2 × SiCH<sub>3</sub>). **<sup>13</sup>C NMR** (125 MHz, CDCl<sub>3</sub>, mixture of two rotamers):  $\delta$  193.7 (8-C), 154.5 (N(CO)O), 154.3

\* Compound **2a** and related cycloadducts **2b–c** were stable for several months when stored in a freezer at -18 °C.

(N(CO)O), 148.1 (9-C), 136.8 (Ar-C<sub>q</sub>), 138.7 (Ar 1-C), 128.7 (Ar-C), 128.3 (Ar-C), 128.2 (Ar-C), 128.1 (Ar-C), 127.3 (10-C), 127.2 (10-C), 90.6 (1-C), 89.8 (1-C), 83.4 (7-C), 67.2 (OCH<sub>2</sub>Ph), 53.9 (2-C or 4-C), 53.5 (2-C or 4-C), 53.1 (2-C or 4-C), 52.7 (2-C or 4-C), 47.1 (5-C), 46.2 (5-C), 31.6 (6-C), 31.5 (6-C), 25.7 (SiC(CH<sub>3</sub>)<sub>3</sub>), 18.6 (SiC<sub>q</sub>), -4.5 (2 × SiCH<sub>3</sub>) [28 of 36 expected peaks observed]. **IR**  $\nu_{\text{max}}$ (film)/cm<sup>-1</sup> 2954, 2953, 1703 (CO), 1652, 1419, 1347, 1163, 919. **HRMS** (ESI): C<sub>23</sub>H<sub>32</sub>NO<sub>5</sub>Si [M+H]<sup>+</sup>; calculated 430.2044, found 430.2048. **X-ray crystallography**: CCDC 1526777 contains the supplementary crystallographic data for this compound. Crystals were grown by slow evaporation from diethyl ether.

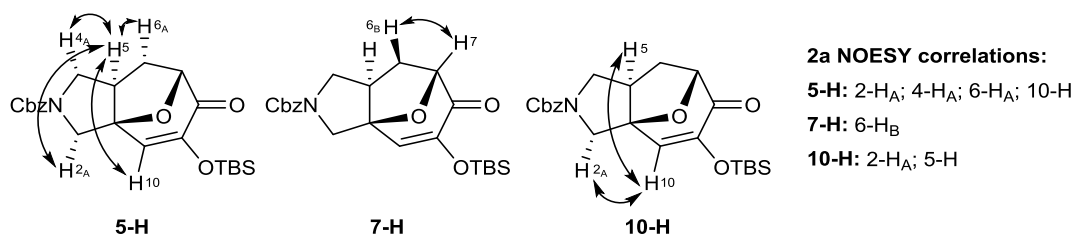

## 2a Crystal Structure:

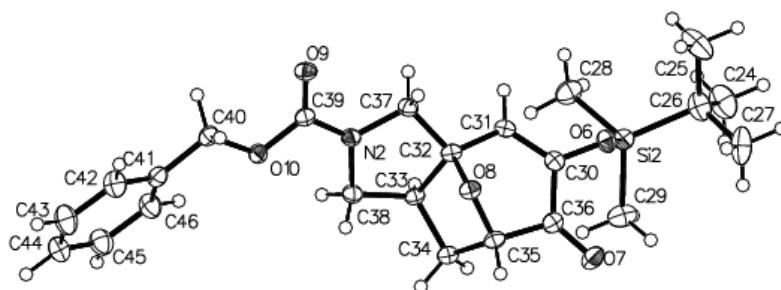

## Benzyl (1*R*\*,7*R*\*)-9-[(*tert*-butyldimethylsilyl)oxy]-8-oxo-11-oxa-3-azatricyclo[5.3.1.0<sup>1,5</sup>]undeca-5,9-diene-3-carboxylate **2b**

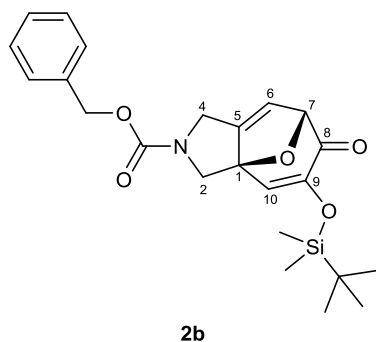

In three batches, stirred solutions of compound **S6** (3 × 3.9 g, 3 × 9.1 mmol [9.1 mmol in each batch, 27.3 mmol over three batches]) in PhMe (3 × 10 mL [10 mL in each batch, 30 mL overall]) were heated at 180 °C under microwave irradiation for 6 h. The three batches were combined and concentrated *in vacuo*. Flash chromatography eluting with 9:1 pentane–EtOAc gave the *title compound* **2b** (5.5 g, 12.9 mmol, 47%) as a colourless amorphous solid.  $R_f$  0.39 (4:1 petrol–EtOAc).

**<sup>1</sup>H NMR** (500 MHz, CDCl<sub>3</sub>, 329 K):  $\delta$  7.40–7.30 (5H, m, Cbz Ar-H), 6.36 (1H, s, 10-H), 6.04 (1H, s, 6-H), 5.19 (2H, s, OCH<sub>2</sub>Ph), 5.17–5.15 (1H, m, 7-H), 4.25 (1H, d,  $J$  16.7, 2-H<sub>A</sub>), 4.14 (1H, app. dd,  $J$  16.7, 1.4, 2-H<sub>B</sub>), 4.05–3.87 (1H, m, 4-H<sub>A</sub>), 3.51 (1H, d,  $J$  11.3, 4-H<sub>B</sub>), 0.94 (9H, s, SiC(CH<sub>3</sub>)<sub>3</sub>), 0.17 (3H, s, SiCH<sub>3</sub>), 0.16 (3H, s, SiCH<sub>3</sub>). **<sup>13</sup>C NMR** (125 MHz, CDCl<sub>3</sub>, mixture of two rotamers):  $\delta$  190.8

(2 peaks, 8-C), 156.4 (9-C), 155.6 (9-C), 154.7 (N(CO)O), 154.5 (N(CO)O), 143.7 (5-C), 136.3 (Ar-C<sub>q</sub>), 128.6 (Ar-C), 128.3 (Ar-C), 128.1 (Ar-C), 127.5 (10-C), 127.4 (10-C), 118.0 (6-C), 93.9 (7-C), 92.2 (1-C), 91.4 (1-C), 67.4 (OCH<sub>2</sub>Ph), 51.9 (2 peaks, 4-C), 43.6 (2-C), 43.5 (2-C), 25.5 (SiC(CH<sub>3</sub>)<sub>3</sub>), 18.4 (SiC<sub>q</sub>), -4.6 (SiCH<sub>3</sub>), -4.7 (SiCH<sub>3</sub>) [26 of 36 expected peaks observed]. **IR**  $\nu_{\text{max}}$ (film)/cm<sup>-1</sup> 2955, 2930, 2887, 2856, 1704, 1606, 1412, 1358. **HRMS** (ESI): C<sub>23</sub>H<sub>30</sub>NO<sub>5</sub>Si [M+H]<sup>+</sup>; calculated 428.1888, found 428.1889.

#### 5.4.1.4 Preparation of O-bridged cycloadduct 2c

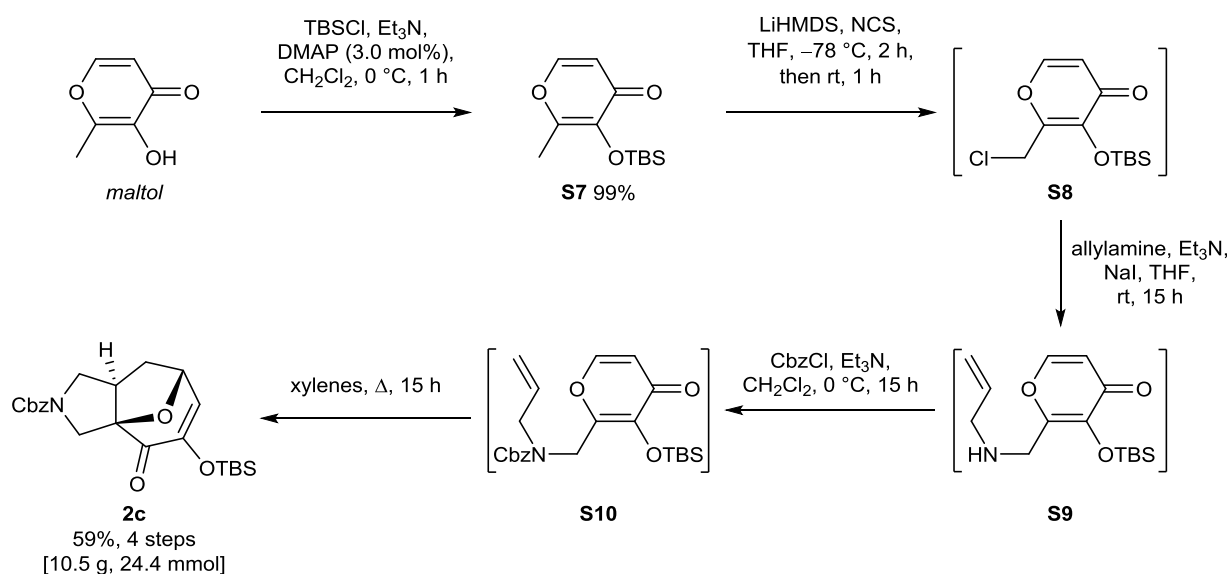

#### 3-[(*tert*-Butyldimethylsilyl)oxy]-2-methyl-4H-pyran-4-one **S7**

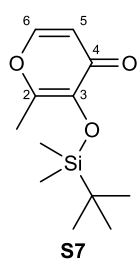

TBSCl (12.1 g, 80.1 mmol, 1.01 eq.) was added to a stirred suspension of maltol (10.0 g, 79.3 mmol, 1.0 eq.), Et<sub>3</sub>N (12.2 mL, 87.2 mmol, 1.1 eq.) and DMAP (290 mg, 2.40 mmol, 0.03 eq.) in CH<sub>2</sub>Cl<sub>2</sub> (150 mL) at 0 °C. The ice-bath was removed and the reaction mixture was stirred for 3 h. The reaction mixture was poured into a solution of 1:1 sat. aq. NH<sub>4</sub>Cl: H<sub>2</sub>O (200 mL). The phases were separated and the aqueous phase was extracted with CH<sub>2</sub>Cl<sub>2</sub> (2 × 50 mL), dried, filtered and concentrated *in vacuo* to give the title compound

**S7** (19.0 g, 79.0 mmol, 99%) as a colourless amorphous solid which was not purified further. **<sup>1</sup>H NMR** (300 MHz, CDCl<sub>3</sub>, characteristic peaks): δ 7.57 (1H, d, *J* 5.7, 6-H), 6.30 (1H, d, *J* 5.7, 5-H), 2.31 (3H, s, CH<sub>3</sub>), 0.97 (9H, s, SiC(CH<sub>3</sub>)<sub>3</sub>), 0.26 (6H, s, 2 × SiCH<sub>3</sub>). Spectral data are consistent with the literature values.<sup>S9</sup>

**Benzyl (1*R*\*,5*R*\*,7*R*\*)-9-[(*tert*-butyldimethylsilyl)oxy]-10-oxo-11-oxa-3-azatricyclo[5.3.1.0<sup>1,5</sup>]undec-8-ene-3-carboxylate **2c****

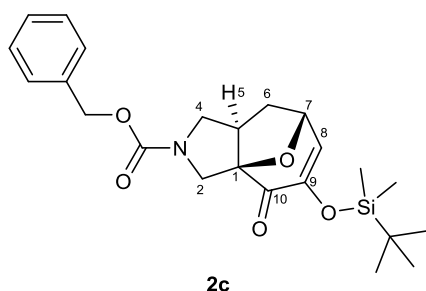

LiHMDS (46.0 mL, 46.0 mmol, 1.10 eq.) was added dropwise to a stirred solution of compound **S7** (10.0 g, 41.6 mmol, 1.00 eq.) in THF (150 mL) at  $-78\text{ }^{\circ}\text{C}$ . The reaction mixture was stirred at  $-78\text{ }^{\circ}\text{C}$  for 1 h, then transferred dropwise *via* cannula to a stirred solution of NCS (5.60 g, 41.6 mmol, 1.00 eq.) in THF (150 mL) at  $-78\text{ }^{\circ}\text{C}$ .

The reaction mixture was stirred for 1 h at  $-78\text{ }^{\circ}\text{C}$ , then slowly warmed to rt. H<sub>2</sub>O (10 mL) was added, then the reaction mixture was concentrated *in vacuo*. The residue was partitioned between pentane\* (100 mL) and sat. aq. NaHCO<sub>3</sub> solution (100 mL). The phases were separated and the aqueous layer was further extracted with pentane (4 × 25 mL). The combined organic layers were dried over MgSO<sub>4</sub>, filtered, and concentrated *in vacuo* to give the crude chloride **S8** as an orange oil (10.8 g), which was not purified further {characteristic <sup>1</sup>H NMR peaks (500 MHz, CDCl<sub>3</sub>):  $\delta$  7.57 (1H, d, *J* 5.5, 6-H), 6.25 (1H, d, *J* 5.5, 5-H), 4.46 (2H, s, CH<sub>2</sub>Cl), 0.88 (9H, s, SiC(CH<sub>3</sub>)<sub>3</sub>), 0.20 (6H, s, 2 × SiCH<sub>3</sub>)}. To the residue **S8** (41.6 mmol) in THF (100 mL) was added Et<sub>3</sub>N (5.8 mL, 41.6 mmol, 1.0 eq.), allylamine (4.7 mL, 108 mmol, 2.6 eq.) and NaI (6.2 g, 41.6 mmol, 1.0 eq.) at rt, in the order stated. The reaction mixture was stirred at rt for 15 h, then concentrated *in vacuo*. The resulting residue was diluted in EtOAc (100 mL) and washed with H<sub>2</sub>O (100 mL). The aqueous layer was extracted with EtOAc (4 × 25 mL). The combined organic layers were washed with brine (50 mL), dried over MgSO<sub>4</sub>, filtered, and concentrated *in vacuo* to give the crude amine **S9** as a brown oil which was not purified further {characteristic <sup>1</sup>H NMR peaks (500 MHz, CDCl<sub>3</sub>):  $\delta$  7.56 (1H, d, *J* 5.6, 6-H), 6.23 (1H, d, *J* 5.6, 5-H), 5.79 (1H, ddt, *J* 16.8, 10.3, 6.1, CH<sub>2</sub>CH=CH<sub>A</sub>H<sub>B</sub>), 5.10 (1H, dd, *J* 16.8, 1.3, CH=CH<sub>A</sub>H<sub>B</sub>), 5.03 (1H, dd, *J* 10.3, 1.3, CH=CH<sub>A</sub>H<sub>B</sub>), 3.75 (2H, s, C<sub>q</sub>CH<sub>2</sub>NH), 3.17 (2H, d, *J* 6.1, NHCH<sub>2</sub>CH=CH<sub>2</sub>), 0.86 (9H, s, SiC(CH<sub>3</sub>)<sub>3</sub>), 0.18 (6H, s, 2 × SiCH<sub>3</sub>)}. To the residue **S9** (41.6 mmol) in CH<sub>2</sub>Cl<sub>2</sub> (100 mL) was added Et<sub>3</sub>N (10.0 mL, 136 mmol, 3.30 eq.) followed by the very slow addition (*exothermic – gas outlet necessary!*) of CbzCl (8.8 mL, 43.1 mmol, 1.05 eq.) at 0 °C. The reaction mixture was warmed to rt and stirred for 2 h. The reaction mixture was quenched with sat. aq. NH<sub>4</sub>Cl solution (150 mL) and H<sub>2</sub>O (150 mL). After phase separation, the aqueous phase was extracted with CH<sub>2</sub>Cl<sub>2</sub> (2 × 150 mL). The organic extracts were combined, dried over Na<sub>2</sub>SO<sub>4</sub> and concentrated *in vacuo*. The resulting residue was flushed through a pad of SiO<sub>2</sub> eluting with EtOAc to give the crude Cbz-protected amine **S10** (15.0 g) as a brown oil {characteristic <sup>1</sup>H NMR peaks (300 MHz, CDCl<sub>3</sub>, 50:50 mixture of rotamers): 7.61 (0.5H,

\* Analysis of the crude reaction product by <sup>1</sup>H NMR spectroscopy at 300 MHz suggested that extraction with pentane removed the majority of the unreacted *N*-chlorosuccinimide.

br. s, 6-H), 7.48 (0.5H, br. s, 6-H), 7.41-7.27 (5H, m, Cbz Ar-H), 6.30 (1H, br. s, 5-H), 5.86-5.62 (1H, m, CH=CH<sub>2</sub>), 5.23-4.99 (2H, m, CH=CH<sub>2</sub>), 5.18 (2H, s, OCH<sub>2</sub>Ph), 4.77-4.51 (2H, m, NCH<sub>2</sub>CH=CH<sub>2</sub>), 3.93 (1H, s, CH<sub>2</sub>N<sup>rotA</sup>), 3.86 (1H, s, CH<sub>2</sub>N<sup>rotB</sup>), 0.94 (9H, s, SiC(CH<sub>3</sub>)<sub>3</sub>), 0.26 (6H, s, SiCH<sub>3</sub>). The residue **S10** was diluted in xylenes (30 mL) and heated at 155 °C for 15 h. The reaction mixture was cooled to rt and concentrated *in vacuo*. Flash chromatography eluting with 4:1 pentane–EtOAc gave the *title compound 2c* (10.5 g, 24.4 mmol, 59%, 4 steps) as a yellow oil. *R<sub>f</sub>* 0.11 (4:1 petrol–EtOAc). <sup>1</sup>H NMR (500 MHz, CDCl<sub>3</sub>, 60:40 mixture of rotamers): δ 7.39–7.34 (4H, m, Cbz Ar-H), 7.34–7.28 (1H, m, Cbz Ar-H), 6.37–6.32 (1H, m, 8-H), 5.13 (2H, s, OCH<sub>2</sub>Ph), 5.00 (1H, app. t, *J* 5.8, 7-H), 4.41–4.33 (1H, m, 2-H<sub>A</sub>, includes at δ 4.36: 0.6H, d, *J* 13.0), 4.10–3.97 (1H, m, 4-H<sub>A</sub>), 3.72–3.60 (1H, m, 2-H<sub>B</sub>, includes at δ 3.69: 0.4H, d, *J* 13.0; and at δ 3.64: 0.6 H, d, *J* 13.0), 3.41–3.30 (1H, m, 4-H<sub>B</sub>), 2.73–2.63 (1H, m, 5-H), 2.23–2.13 (1H, m, 6-H<sub>A</sub>), 2.12–2.00 (1H, m, 6-H<sub>B</sub>), 0.93 (9H, s, SiC(CH<sub>3</sub>)<sub>3</sub>), 0.18–0.12 (6H, m, 2 × SiCH<sub>3</sub>, includes at δ 0.16: 3.6H, s; and at δ 0.14: 2.4H, s). <sup>13</sup>C NMR (125 MHz, CDCl<sub>3</sub>, mixture of two rotamers, 328 K): δ 191.6 (10-C), 154.6 (N(CO)O), 146.1 (9-C), 137.0 (Ar-C<sub>q</sub>), 129.4 (8-C), 128.6 (Ar-C), 128.1 (Ar-C), 128.0 (Ar-C), 97.2 (1-C), 76.2 (7-C), 67.2 (OCH<sub>2</sub>Ph), 53.4 (4-C), 49.5 (2-C), 43.9 (5-C), 43.1 (5-C), 37.7 (6-C), 25.7 (SiC(CH<sub>3</sub>)<sub>3</sub>), 18.5 (SiC<sub>q</sub>), -4.5 (SiCH<sub>3</sub>), -4.6 (SiCH<sub>3</sub>) [20 of 36 expected peaks observed]. IR *v*<sub>max</sub>(film)/cm<sup>-1</sup> 2955, 2931, 2885, 2858, 1704 (CO), 1622, 1419, 1361, 1338, 1261. HRMS (ESI): C<sub>23</sub>H<sub>32</sub>NO<sub>5</sub>Si [M+H]<sup>+</sup>; calculated 430.2044, found 430.2050.

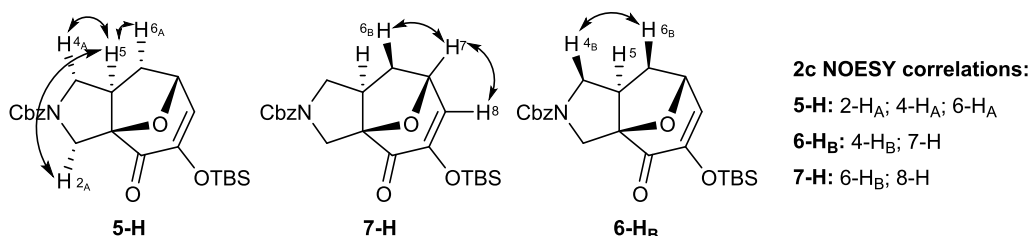

#### 5.4.1.5 Preparation of precursors to *N*-bridged cycloadducts 2d-g

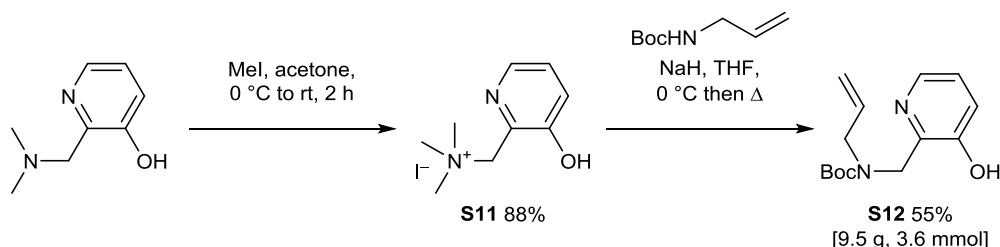

### [(3-Hydroxypyridin-2-yl)methyl]trimethylazanium iodide **S11**

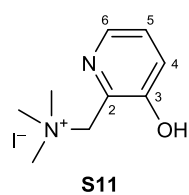

Methyl iodide (8.40 mL, 132 mmol, 1.00 eq.) was added to stirred solution of 2-(dimethylaminomethyl)-3-hydroxypyridine (20.1 g, 132 mmol, 1.00 eq.) in acetone (66 mL) at 0 °C. The resulting mixture was warmed to rt and stirred for 2 h, during which time a pale yellow precipitate formed. The solid was collected by

filtration to give the title compound **S11** (34.1 g, 115.9, 88%) as a pale yellow solid. **M.p.** Decomposition observed above 164 °C. **<sup>1</sup>H NMR** (D<sub>2</sub>O, 400 MHz): 8.21 (1H, dd, *J* 3.9, 2.1, 5-H), 7.56-7.47 (2H, m, 4-H and 6-H), 4.61 (2H, s, CH<sub>2</sub>Ar), 3.21 (9H, s, N<sup>+</sup>(CH<sub>3</sub>)<sub>3</sub>). **<sup>13</sup>C NMR** (D<sub>2</sub>O, 100 MHz): 154.3, 141.1, 134.7, 127.6, 125.7, 64.5, 53.2. **IR**  $\nu_{\text{max}}$ (film)/cm<sup>-1</sup> 3381, 1629, 1583, 1484, 1462, 1300. **HRMS** (ESI): C<sub>9</sub>H<sub>15</sub>N<sub>2</sub>O [M]<sup>+</sup>; calculated 167.1184, found 167.1186.

### *tert*-Butyl *N*-[(3-hydroxypyridin-2-yl)methyl]-*N*-(prop-2-en-1-yl)carbamate **S12**

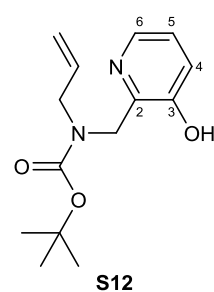

*N*-Boc-allylamine (10.2 g, 65.1 mmol, 1.00 eq.) was added to a stirred suspension of NaH (60% dispersion in mineral oil, 5.47 g, 137 mmol, 2.10 eq.) in THF (280 mL) at 0 °C. The resulting suspension was stirred at rt for 2 h. After this time, the suspension was cooled to 0 °C and trimethyl ammonium salt **S11** (21.1 g, 71.6 mmol, 1.10 eq.) was added in one portion. The suspension was stirred at reflux for 2 h, then cooled to rt and quenched with sat. aq. NH<sub>4</sub>Cl solution (100 mL).

EtOAc (100 mL) was added and the layers were separated. The aqueous layer was extracted with EtOAc (2 x 100 mL). The combined organic layers were dried over MgSO<sub>4</sub>, filtered, and concentrated *in vacuo* to deliver a crude brown oil. Flash chromatography eluting with (4:5:1 petrol–CH<sub>2</sub>Cl<sub>2</sub>–EtOAc) gave the *title compound* **S12** (9.47 g, 35.8 mmol, 55%) as a colourless solid. **<sup>1</sup>H NMR** (MeOD-d<sub>4</sub>, 500 MHz, 333 K): 7.87 (1H, dd, *J* 4.4, 1.7, 6-H), 7.08 (1H, dd, *J* 8.1, 1.6, 4-H), 7.05 (1H, dd, *J* 8.1, 4.4, 5-H), 5.67 (1H, ddt, *J* 17.0, 10.4, 5.6, CH=CH<sub>2</sub>), 4.98 (1H, app. dq, *J* 17.0, 1.7, CH=CH<sub>A</sub>H<sub>B</sub>), 4.96 (1H, app dq, *J* 10.4, 1.5, CH=CH<sub>A</sub>H<sub>B</sub>), 4.37 (2H, s, CH<sub>2</sub>Ar), 3.80 (2H, d, *J* 5.6, NCH<sub>2</sub>CH=CH<sub>2</sub>), 1.33 (9H, s, C<sub>q</sub>(CH<sub>3</sub>)<sub>3</sub>). **<sup>13</sup>C NMR** (MeOD-d<sub>4</sub>, 125 MHz, 333 K): 158.3, 153.7, 146.0, 140.6, 134.9, 124.9, 124.3, 116.7, 81.7, 50.9, 48.7, 28.7. **IR**  $\nu_{\text{max}}$ (film)/cm<sup>-1</sup> 3271, 1651, 1447, 1414, 1161. **HRMS** (ESI): C<sub>14</sub>H<sub>21</sub>N<sub>2</sub>O<sub>3</sub> [MH]<sup>+</sup>; calculated 265.1547, found 265.1551.

### 5.4.1.6 Preparation of the *N*-bridged cycloadducts 2d-g

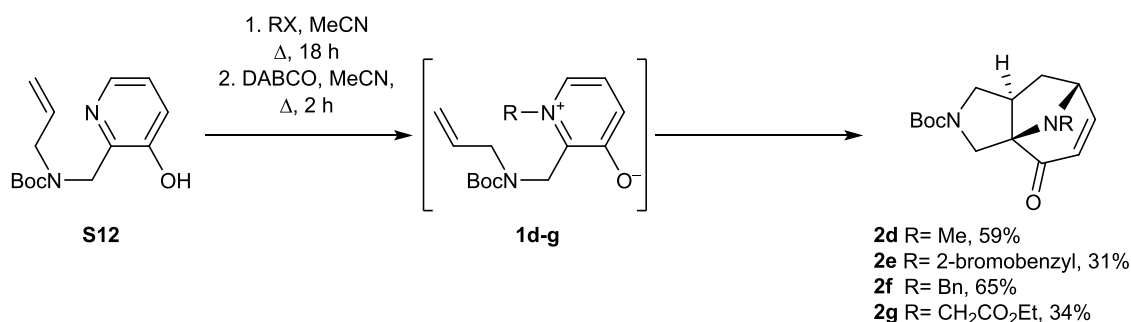

#### General procedure K: Synthesis of *N*-bridged cycloadducts 2d-g

Alkyl halide (RX, 1.1 eq.) was added to a stirred solution of compound **S12** (1.0 eq.) in MeCN (0.5 M) and the resulting solution was stirred at reflux for 18 h. After cooling to rt, DABCO (3.0 eq.) was added in one portion and the resulting suspension was stirred at reflux for 2 h, then cooled to rt. H<sub>2</sub>O (3 volumes) and CH<sub>2</sub>Cl<sub>2</sub> (3 volumes) were added and the layers were separated. The aqueous layer was extracted with CH<sub>2</sub>Cl<sub>2</sub> (3 volumes) and the combined organic layers were dried over MgSO<sub>4</sub>, filtered, and concentrated *in vacuo* to give a crude material. The crude products were purified by flash chromatography.

#### *tert*-Butyl (1*R*<sup>\*</sup>,5*R*<sup>\*</sup>,7*R*<sup>\*</sup>)-11-methyl-10-oxo-3,11-diazatricyclo[5.3.1.0<sup>1,5</sup>]undec-8-ene-3-carboxylate **2d**

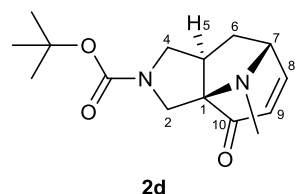

General procedure **K** was followed using compound **S12** (7.8 g, 29.5 mmol) and methyl iodide. Flash chromatography eluting with 4:5:1 petrol–CH<sub>2</sub>Cl<sub>2</sub>–EtOAc gave the *title compound* **2d** (4.88 g, 17.5 mmol, 59%) as a yellow solid. **<sup>1</sup>H NMR** (MeOD-*d*<sub>4</sub>, 500 MHz, 333 K): 6.95 (1H, dd, *J* 9.8, 4.8, 8-H), 5.90 (1H, d, *J* 9.8, 9-H), 3.96 (1H, d, *J* 12.4, 2-H<sub>A</sub>), 3.86 (1H, td, *J* 5.2, 0.9, 7-H), 3.81 (1H, dd, *J* 10.9, 9.4, 4-H<sub>B</sub>), 3.21 (1H, dd, *J* 10.9, 8.1, 4-H<sub>A</sub>), 3.18 (1H, d, *J* 12.4, 2-H<sub>B</sub>), 2.57-2.47 (1H, m, 5-H), 2.25 (3H, s, NCH<sub>3</sub>), 1.98-1.89 (2H, m, 6-H), 1.37 (9H, s, C<sub>q</sub>(CH<sub>3</sub>)<sub>3</sub>). **<sup>13</sup>C NMR** (MeOD-*d*<sub>4</sub>, 125 MHz, 333 K): 197.4, 156.0, 151.3, 127.2, 82.7, 81.1, 64.9, 54.3, 47.1, 45.7, 35.6, 32.5, 28.8. **IR**  $\nu_{\text{max}}$ (film)/cm<sup>-1</sup> 1675, 1403, 1365, 1165, 1140, 1125, 1113, 881. **HRMS** (ESI): C<sub>15</sub>H<sub>23</sub>N<sub>2</sub>O<sub>3</sub> [MH]<sup>+</sup>; calculated 279.1703, found 279.1704. **X-ray crystallography**: CCDC 1526780 contains the supplementary crystallographic data for this compound. Crystals were grown by slow evaporation from dichloromethane.



## 2d Crystal Structure:

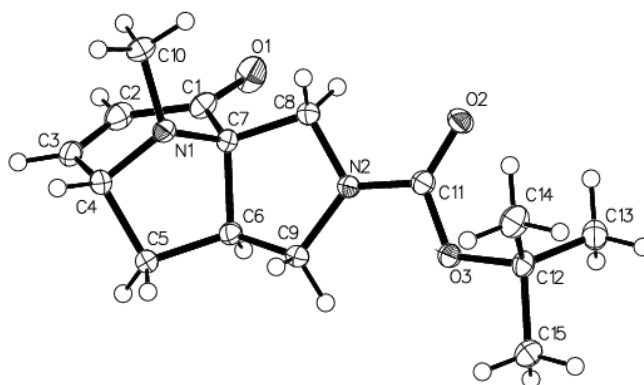

### ***tert*-Butyl (1*R*\*,5*R*\*,7*R*\*)-11-[(2-bromophenyl)methyl]-10-oxo-3,11-diazatricyclo[5.3.1.0<sup>1,5</sup>]undec-8-ene-3-carboxylate **2e****

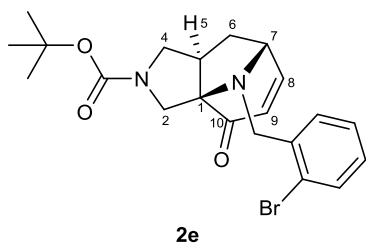

General procedure **K** was followed using compound **S12** (1.2 g, 4.5 mmol) and 2-bromobenzyl bromide. Flash chromatography eluting with 9:1 CH<sub>2</sub>Cl<sub>2</sub>–EtOAc gave the *title compound* **2e** (617 mg, 1.42 mmol, 31%) as a yellow oil. **<sup>1</sup>H NMR** (MeOD-*d*<sub>4</sub>, 500 MHz, 333 K): 7.43 (1H, dd, *J* 8.0, 1.1, Ar 3-H), 7.26 (1H, dd, *J* 7.6, 1.6, Ar 6-H), 7.19 (1H, app. td, *J* 7.5, 1.1, Ar 5-H), 7.05 (1H, app. td, *J* 7.7, 1.6, Ar 4-H), 7.04 (1H, dd, *J* 9.8, 4.7, 8-H), 6.00 (1H, d, *J* 9.8, 9-H), 3.99 (1H, d, *J* 12.6, 2-H<sub>A</sub>), 3.82 (1H, dd, *J* 10.8, 9.2, 4-H<sub>B</sub>), 3.76 (1H, d, *J* 14.1, NCH<sub>A</sub>H<sub>B</sub>Ar), 3.76–3.71 (1H, m, 7-H), 3.65 (1H, d, *J* 14.1, NCH<sub>A</sub>H<sub>B</sub>Ar), 3.40 (1H, d, *J* 12.6, 2-H<sub>B</sub>), 3.30 (1H, dd, *J* 10.8, 8.0, 4-H<sub>A</sub>), 2.55 (1H, app. qd, *J* 8.4, 4.5, 5-H), 1.93 (1H, dd, *J* 12.2, 8.5, 6-H<sub>A</sub>), 1.90–1.78 (1H, m, 6-H<sub>B</sub>), 1.35 (9H, s, C<sub>q</sub>(CH<sub>3</sub>)<sub>3</sub>). **<sup>13</sup>C NMR** (MeOD-*d*<sub>4</sub>, 125 MHz, 333 K): 197.0, 156.1, 152.7, 139.3, 134.0, 131.8, 130.0, 128.6, 127.8, 125.1, 82.7, 81.0, 61.3, 54.5, 50.3, 47.4, 45.4, 35.5, 28.8. **IR**  $\nu_{\text{max}}$ (film)/cm<sup>-1</sup> 1676, 1406, 1167, 1122, 887. **HRMS** (ESI): C<sub>21</sub>H<sub>26</sub><sup>79</sup>BrN<sub>2</sub>O<sub>3</sub> [MH]<sup>+</sup>; calculated 433.1121, found 433.1115.

***tert*-Butyl (1*R*\*,5*R*\*,7*R*\*)-11-benzyl-10-oxo-3,11-diazatricyclo[5.3.1.0<sup>1,5</sup>]undec-8-ene-3-carboxylate **2f****

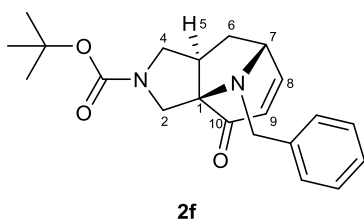

General procedure **K** was followed using compound **S12** (8.57 g, 32.4 mmol) and benzyl bromide. Flash chromatography eluting with 4:5:1 petrol-CH<sub>2</sub>Cl<sub>2</sub>-EtOAc gave the *title compound* **2f** (7.42 g, 20.9 mmol, 65%) as a yellow oil. **<sup>1</sup>H NMR** (MeOD-d<sub>4</sub>, 500 MHz, 333 K): 7.21-7.09 (5H, m, Bn Ar-H), 6.95 (1H, dd, *J* 9.8, 4.8, 8-H), 5.99 (1H, d, *J* 9.8, 9-H), 3.98 (1H, d, *J* 12.5, 2-H<sub>A</sub>), 3.82 (1H, dd, *J* 10.9, 9.2, 4-H<sub>B</sub>), 3.76-3.69 (1H, m, 7-H), 3.63 (1H, d, *J* 13.7, NCH<sub>A</sub>H<sub>B</sub>Ph), 3.56 (1H, d, *J* 13.7, NCH<sub>A</sub>H<sub>B</sub>Ph), 3.31 (1H, dd, *J* 10.9, 7.9, 4-H<sub>A</sub>), 3.30-3.23 (1H, m, 2-H<sub>B</sub>), 2.55 (1H, app. qd, *J* 8.5, 4.7, 5-H), 1.93 (1H, dd, *J* 12.1, 8.5, 6-H<sub>A</sub>), 1.80-1.89 (1H, m, 6-H<sub>B</sub>), 1.36 (9H, s, C<sub>q</sub>(CH<sub>3</sub>)<sub>3</sub>). **<sup>13</sup>C NMR** (MeOD-d<sub>4</sub>, 125 MHz, 333 K): 197.3, 156.1, 152.1, 140.3, 129.4, 129.3, 128.2, 127.9, 82.7, 81.1, 61.4, 54.3, 50.4, 47.6, 45.8, 35.3, 28.7. **IR** *v*<sub>max</sub>(film)/cm<sup>-1</sup> 1681, 1403, 1365, 1167, 1125, 882. **HRMS** (ESI): C<sub>21</sub>H<sub>27</sub>N<sub>2</sub>O<sub>3</sub> [MH]<sup>+</sup>; calculated 355.2016, found 355.2023.

***tert*-Butyl (1*R*\*,5*R*\*,7*R*\*)-11-(2-ethoxy-2-oxoethyl)-10-oxo-3,11-diazatricyclo[5.3.1.0<sup>1,5</sup>]undec-8-ene-3-carboxylate **2g****

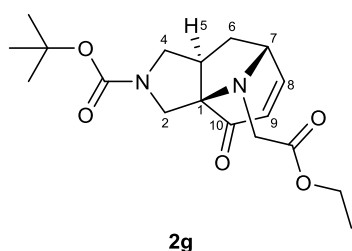

General procedure **K** was followed using compound **S12** (2.44 g, 9.23 mmol) and ethyl bromoacetate. Flash chromatography eluting with 3:5:2 petrol-CH<sub>2</sub>Cl<sub>2</sub>-EtOAc gave the *title compound* **2g** (1.10 g, 3.14 mmol, 34%) as a yellow oil. **<sup>1</sup>H NMR** (MeOD-d<sub>4</sub>, 500 MHz, 333 K): 7.01 (1H, dd, *J* 9.8, 4.8, 8-H), 5.93 (1H, d, *J* 9.8, 9-H), 4.20-4.12 (1H, m, 7-H), 4.11-4.02 (2H, m, CO<sub>2</sub>CH<sub>2</sub>CH<sub>3</sub>), 3.99 (1H, d, *J* 12.5, 2-H<sub>A</sub>), 3.82 (1H, dd, *J* 10.8, 9.2, 4-H<sub>B</sub>), 3.33-3.24 (2H, m, 4-H<sub>A</sub> and NCH<sub>A</sub>H<sub>B</sub>CO<sub>2</sub>Et), 3.18 (1H, *J* 16.6, NCH<sub>A</sub>H<sub>B</sub>CO<sub>2</sub>Et), 3.17 (1H, d, *J* 12.5, 2-H<sub>B</sub>), 2.51 (1H, app. qd, *J* 8.5, 4.9, 5-H), 2.03-1.91 (2H, m, 6-H), 1.36 (9H, s, C<sub>q</sub>(CH<sub>3</sub>)<sub>3</sub>), 1.15 (3H, t, *J* 7.1, CO<sub>2</sub>CH<sub>2</sub>CH<sub>3</sub>). **<sup>13</sup>C NMR** (MeOD-d<sub>4</sub>, 125 MHz, 333 K, one C not observed): 196.3, 172.3, 156.1, 152.5, 127.9, 81.2, 62.7, 62.0, 54.2, 48.6, 47.7, 47.6, 35.2, 28.8, 14.4. **IR** *v*<sub>max</sub>(film)/cm<sup>-1</sup> 1746, 1682, 1406, 1164, 1128, 766. **HRMS** (ESI): C<sub>18</sub>H<sub>27</sub>N<sub>2</sub>O<sub>5</sub> [MH]<sup>+</sup>; calculated 351.1914, found 351.1917.

## 5.4.2 Preparation of scaffolds

### 5.4.2.1 Scaffolds derived from cycloadduct 2a

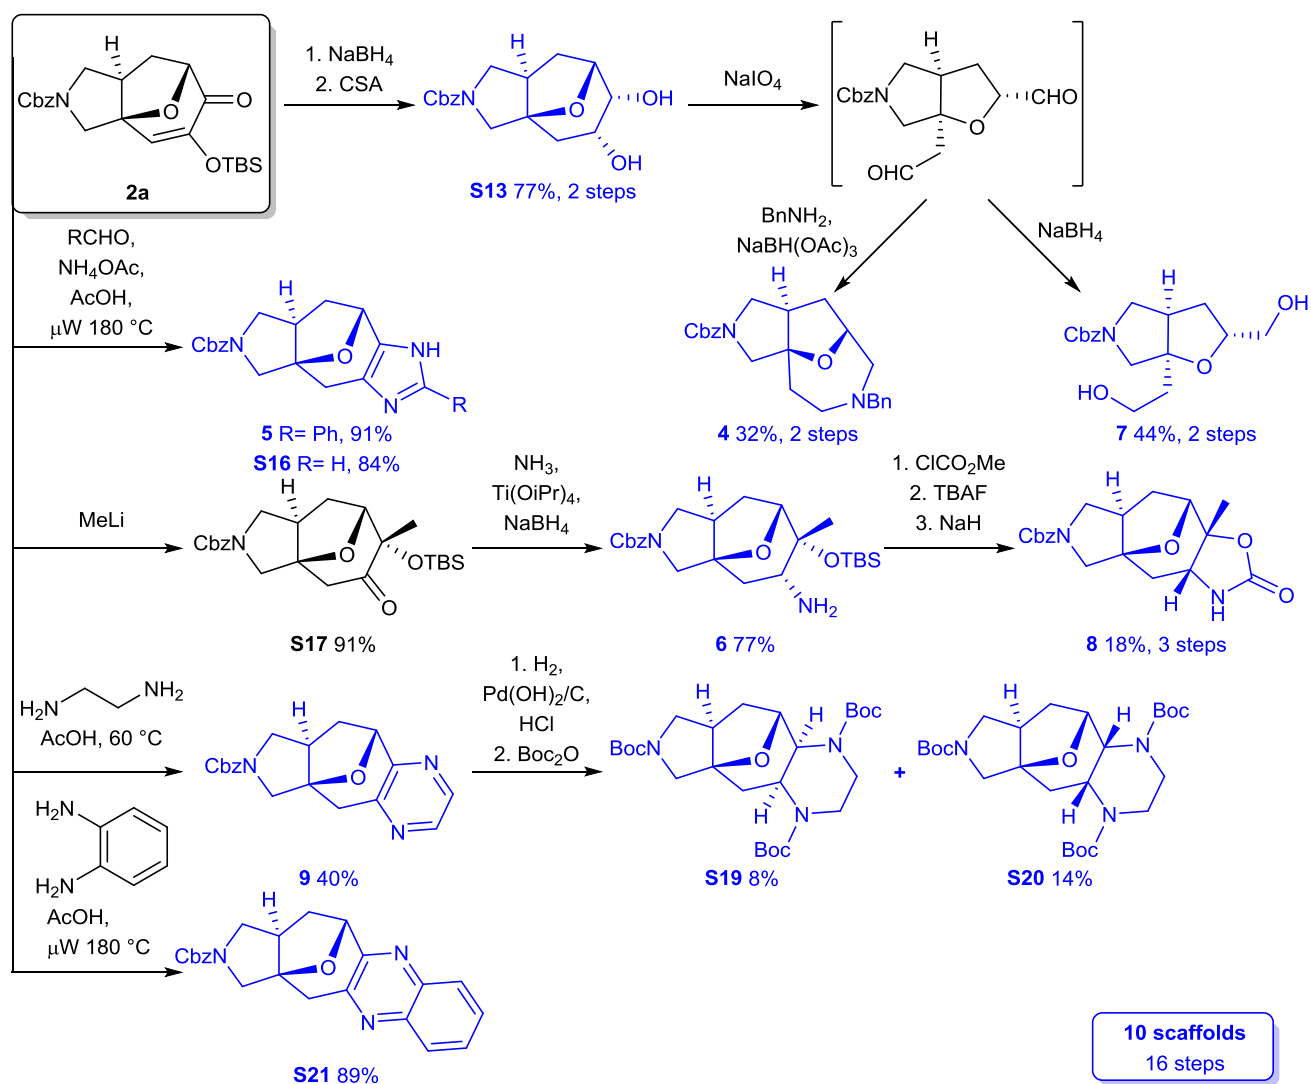

### 5.4.2.1.1 Preparation of cyclic amine **4**, and diols **7** and **S13**

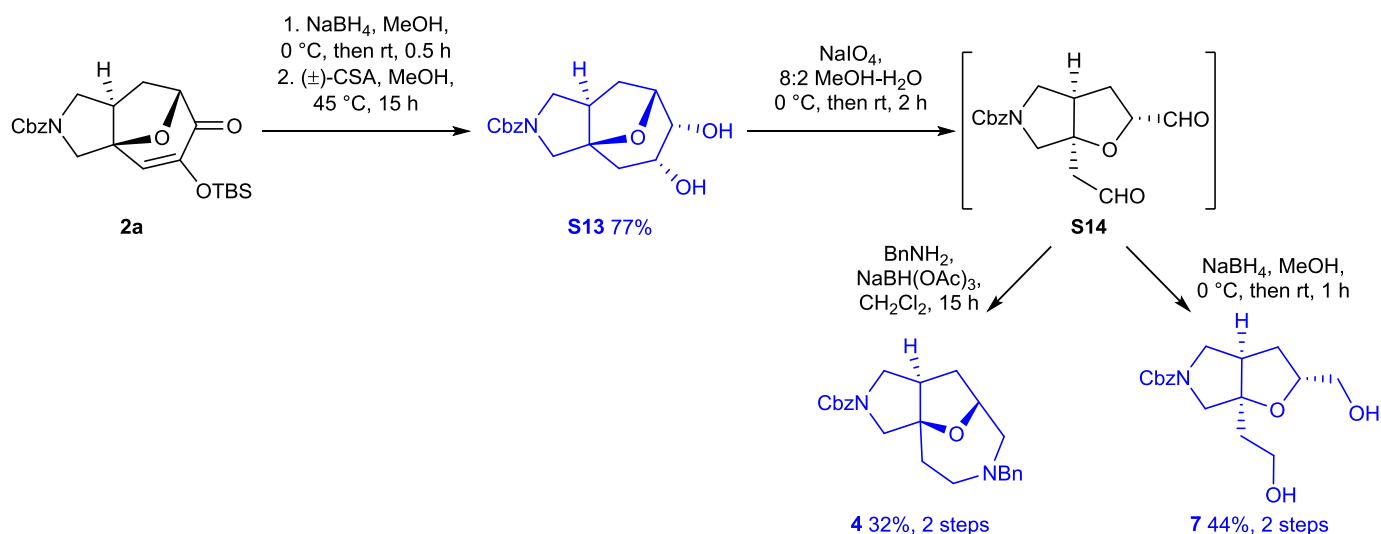

### Benzyl (1*R*\*,5*R*\*,7*R*\*,8*R*\*,9*R*\*)-8,9-dihydroxy-11-oxa-3-azatricyclo[5.3.1.0<sup>1,5</sup>]undecane-3-carboxylate **S13**

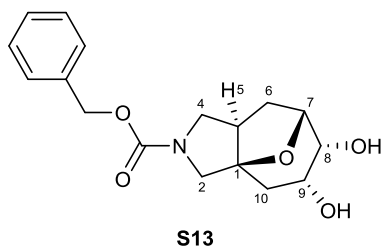

NaBH<sub>4</sub> (832 mg, 22.0 mmol, 2.20 eq.) was added to a stirred solution of cycloadduct **2a** (4.30 g, 10.0 mmol, 1.0 eq.) in MeOH (60 mL) at 0 °C. The reaction mixture was stirred at 0 °C for 5 min, warmed to rt and stirred for 0.5 h, then concentrated *in vacuo*. The residue was diluted in CH<sub>2</sub>Cl<sub>2</sub> (50 mL) and washed with 1N HCl (50 mL). The aqueous phase was extracted with CH<sub>2</sub>Cl<sub>2</sub> (50 mL). The organic extracts were combined, washed with brine (50 mL), dried over Na<sub>2</sub>SO<sub>4</sub>, filtered, and concentrated *in vacuo*. The residue (10.0 mmol) was dissolved in MeOH (60 mL) and (±)-camphorsulfonic acid (3.02 g, 13.0 mmol, 1.30 eq.) was added. The reaction mixture was heated at 45 °C for 15 h, then concentrated *in vacuo*. The residue was diluted in CH<sub>2</sub>Cl<sub>2</sub> (50 mL) and washed with 1:1 sat. aq. NaHCO<sub>3</sub>:H<sub>2</sub>O (100 mL). The aqueous phase was extracted with CH<sub>2</sub>Cl<sub>2</sub> (2 × 50 mL). The organic extracts were combined, dried over Na<sub>2</sub>SO<sub>4</sub> and concentrated *in vacuo*. Flash chromatography eluting with 0-10% MeOH in EtOAc gave the *title compound* **S13** (2.45 g, 7.67 mmol, 77%, 2 steps) as a colourless oil. *R*<sub>f</sub> 0.58 (9:1 EtOAc–MeOH). <sup>1</sup>H NMR (500 MHz, CDCl<sub>3</sub>, 50:50 mixture of rotamers): δ 7.41-7.27 (5H, m, Cbz Ar-H), 5.11 (2H, s, OCH<sub>2</sub>Ph), 4.35 (1H, dd, *J* 7.2, 4.8, 7-H), 4.15-4.10 (1H, m, 9-H), 3.93-3.85 (1H, m, 4-H<sub>A</sub>, includes at δ 3.91: 0.5H, d, *J*, 10.5; and at δ 3.87: 0.5H, d, *J*, 10.5), 3.86-3.80 (1H, m, 8-H), 3.79-3.71 (1H, m, 2-H<sub>A</sub>, includes at δ 3.76: 0.5H, d, *J*, 12.6; and at δ 3.74: 0.5H, d, *J*, 12.6), 3.41 (0.5H, d, *J* 12.6, 2-H<sub>B</sub>), 3.36 (0.5H, d, *J* 12.6, 2-H<sub>B</sub>), 3.24-3.15 (1H, m, 4-H<sub>B</sub>), 3.08-3.00 (1H, m, 5-H), 2.63 (1H, app. td, *J* 12.7, 8.5, 6-H<sub>A</sub>), 2.49 (2H, br. s, 2 × OH), 2.19 (0.5H, dd, *J* 14.7, 4.3, 10-H<sub>B</sub>), 2.13

(0.5H, dd,  $J$  14.7, 4.3, 10-H<sub>B</sub>), 1.97-1.90 (1H, m, 10-H<sub>A</sub>, includes at  $\delta$  1.95: 0.5H, d,  $J$  14.7; and at  $\delta$  1.93: 0.5H, d,  $J$  14.7), 1.78-1.66 (1H, m, 6-H<sub>B</sub>). **<sup>13</sup>C NMR** (125 MHz, DMSO-d<sub>6</sub>, mixture of two rotamers):  $\delta$  153.5 (N(CO)O), 153.4 (N(CO)O), 137.1 (Ar-C<sub>q</sub>), 128.4 (Ar-C), 127.7 (Ar-C), 127.5 (Ar-C), 88.7 (1-C), 87.7 (1-C), 79.0 (7-C), 68.0 (8-C), 65.9 (9-C), 65.7 (OCH<sub>2</sub>Ph), 54.8 (2-C or 4-C), 54.5 (2-C or 4-C), 54.2 (2-C or 4-C), 54.0 (2-C or 4-C), 44.2 (5-C), 43.2 (5-C), 38.0 (10-C), 37.9 (10-C), 32.7 (6-C), 32.6 (6-C) [22 of 30 expected peaks observed]. **IR**  $\nu_{\text{max}}$ (film)/cm<sup>-1</sup> 3423 (OH), 2948, 2884, 1683 (CO), 1425, 1350, 1149, 1107. **HRMS** (ESI): C<sub>17</sub>H<sub>22</sub>NO<sub>5</sub> [M+H]<sup>+</sup>; calculated 320.1495, found 320.1496.

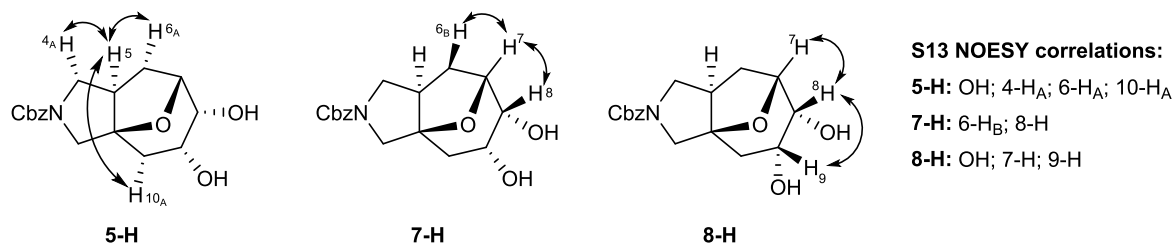

#### Benzyl (1*R*\*,5*R*\*,7*R*\*)-9-benzyl-12-oxa-3,9-diazatricyclo[5.4.1.0<sup>1,5</sup>]dodecane-3-carboxylate **4**

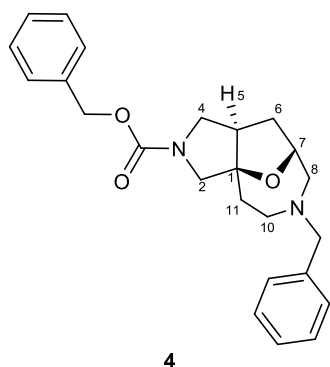

NaIO<sub>4</sub> (105 mg, 0.490 mmol, 2.00 eq.) was added to a stirred solution of diol **S13** (78 mg, 0.24 mmol, 1.0 eq.) in 8:2 MeOH–H<sub>2</sub>O (10 mL) at 0 °C. The reaction mixture was warmed to rt and stirred for 2 h. The reaction mixture was concentrated *in vacuo* and the residue was diluted in CH<sub>2</sub>Cl<sub>2</sub> (10 mL), and washed with H<sub>2</sub>O (10 mL). The phases were separated, and the aqueous phase extracted with CH<sub>2</sub>Cl<sub>2</sub> (2 × 10 mL). The organic extracts were combined, washed with brine, dried over Na<sub>2</sub>SO<sub>4</sub> and concentrated *in vacuo*. The resulting crude dialdehyde was dissolved in CH<sub>2</sub>Cl<sub>2</sub> (10 mL). BnNH<sub>2</sub> (26  $\mu$ L, 0.25 mmol, 1.0 eq.), NaBH(OAc)<sub>3</sub> (153 mg, 0.72 mmol, 3.0 eq.) and 4 Å MS (10 mg) were added. The reaction mixture was stirred for 15 h then filtered through Celite and concentrated *in vacuo*. The resulting residue was diluted in EtOAc (25 mL) and washed with brine (25 mL). The aqueous phase was extracted with EtOAc (2 × 10 mL). The combined organic phase was dried over MgSO<sub>4</sub>, filtered and concentrated *in vacuo*. Flash chromatography eluting with 0-100% EtOAc in pentane gave the *title compound* **4** (30 mg, 76  $\mu$ mol, 32%, 2 steps) as a colourless oil. **R<sub>f</sub>** 0.74 (1:1 petrol–EtOAc). **<sup>1</sup>H NMR** (500 MHz, CDCl<sub>3</sub>, 50:50 mixture of rotamers):  $\delta$  7.39-7.21 (10H, m, Ar-H), 5.11 (2H, s, OCH<sub>2</sub>Ph), 4.43-4.38 (1H, m, 7-H, includes at  $\delta$  4.41: 0.5H, d,  $J$  8.1; and at  $\delta$  4.40: 0.5H, d,  $J$  8.1), 3.89 (1H, d,  $J$  12.3, 2-H<sub>A</sub>), 3.64-3.53 (3H, includes: 1H, m, 4-H<sub>A</sub>; at  $\delta$  3.61: 1H, d,  $J$  13.3, NCH<sub>A</sub>H<sub>B</sub>Ph; and at  $\delta$  3.55: 1H, d,  $J$  13.3, NCH<sub>A</sub>H<sub>B</sub>Ph), 3.52-3.33 (1H, m, 4-H<sub>B</sub>), 3.22-3.06 (1H, m, 2-H<sub>B</sub>), 2.90-2.80 (1H, m, 5-H), 2.77-2.68 (1H, m, 10-H<sub>A</sub>), 2.58-2.44 (2H, includes: 1H, m, 10-H<sub>B</sub>; and at  $\delta$  2.52: 1H, d,  $J$  12.4, 8-H<sub>A</sub>), 2.43-2.36 (1H, m, 8-H<sub>B</sub>, includes at  $\delta$  2.40: 0.5H, d,  $J$  12.4;

and at  $\delta$  2.39: 0.5H, d,  $J$  12.4), 2.28-2.21 (1H, m, 6-H<sub>A</sub>), 1.92-1.74 (3H, m, 6-H<sub>B</sub> and 11-H). **<sup>13</sup>C NMR** (125 MHz, CDCl<sub>3</sub>, mixture of two rotamers):  $\delta$  155.1 (N(CO)O), 139.9 (Ar-C<sub>q</sub>) 137.1 (Ar-C<sub>q</sub>), 128.8 (Ar-C), 128.6 (Ar-C), 128.5 (Ar-C), 128.0 (2 peaks, 2 × Ar-C), 127.2 (Ar-C), 93.2 (1-C), 92.2 (1-C), 80.2 (7-C), 66.9 (OCH<sub>2</sub>Ph), 64.3 (NCH<sub>2</sub>Ph), 63.6 (8-C), 57.9 (2-C), 57.5 (2-C), 54.0 (4-C), 53.8 (4-C), 53.6 (10-C), 50.1 (5-C), 38.3 (11-C), 36.6 (6-C) [23 of 40 expected peaks observed]. **IR**  $\nu_{\text{max}}$ (film)/cm<sup>-1</sup> 2930, 2865, 1702 (CO), 1451, 1419, 1360, 1217, 1143. **HRMS** (ESI): C<sub>24</sub>H<sub>29</sub>N<sub>2</sub>O<sub>3</sub> [M+H]<sup>+</sup>; calculated 393.2173, found 393.2185.

### Benzyl (2*R*\*,3*aR*\*,6*aR*\*)-6a-(2-hydroxyethyl)-2-(hydroxymethyl)-hexahydro-2H-furo[2,3-*c*]pyrrole-5-carboxylate **7**

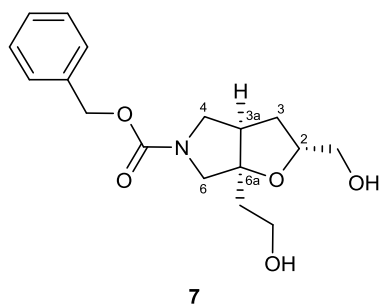

NaIO<sub>4</sub> (4.30 g, 20.1 mmol, 2.60 eq.) was added to a stirred solution of diol **S13** (2.45 g, 7.67 mmol, 1.0 eq.) in 2:1 MeOH–H<sub>2</sub>O (60 mL) at 0 °C. The reaction mixture was warmed to rt, stirred for 2 h, then concentrated *in vacuo*. The residue was diluted in CH<sub>2</sub>Cl<sub>2</sub> (50 mL) and washed with H<sub>2</sub>O (50 mL). The aqueous phase was extracted with EtOAc (2 × 50 mL). The combined organic extracts were dried over MgSO<sub>4</sub>, filtered and concentrated *in vacuo* to give crude aldehyde **S14** {characteristic <sup>1</sup>H NMR peaks (300 MHz, CDCl<sub>3</sub>):  $\delta$  9.82 (1H, t,  $J$  1.9, CH<sub>2</sub>CHO), 9.64 (1H, d,  $J$  1.4, CHCHO), 7.42-7.28 (5H, m, Cbz Ar-H), 5.13 (2H, s, OCH<sub>2</sub>Ph)}. NaBH<sub>4</sub> (720 mg, 18.6 mmol, 2.40 eq.) was added to a stirred solution of the crude aldehyde **S14** in MeOH (50 mL) at 0 °C. The reaction mixture was warmed to rt, stirred 1 h, then concentrated *in vacuo*. The residue was diluted in CH<sub>2</sub>Cl<sub>2</sub> (50 mL) and washed with brine (50 mL). The aqueous phase was extracted with EtOAc (3 × 50 mL). The combined organic phase was dried over MgSO<sub>4</sub>, filtered and concentrated *in vacuo*. Flash chromatography eluting with 9:1 EtOAc–MeOH gave the *title compound* **7** (1.10 g, 3.40 mmol, 44%, 2 steps) as a colourless oil.  $R_f$  0.43 (9:1 EtOAc–MeOH). **<sup>1</sup>H NMR** (500 MHz, CDCl<sub>3</sub>, 2 × OH not observed):  $\delta$  7.40-7.28 (5H, m, Cbz Ar-H), 5.13 (2H, s, OCH<sub>2</sub>Ph), 4.33-4.26 (1H, m, 2-H), 3.93-3.79 (4H, m, 6-H<sub>A</sub>, CHCH<sub>A</sub>H<sub>B</sub>OH and CH<sub>2</sub>CH<sub>2</sub>OH), 3.74 (1H, dd,  $J$  11.4, 9.1, 4-H<sub>B</sub>), 3.50 (1H, dd,  $J$  12.5, 3.0, CHCH<sub>A</sub>H<sub>B</sub>OH), 3.47-3.28 (2H, m, 4-H<sub>A</sub> and 6-H<sub>B</sub>), 2.71-2.64 (1H, m, 3a-H), 2.21 (1H, ddd,  $J$  12.8, 9.7, 7.3, 3-H<sub>A</sub>), 2.03-1.95 (1H, m, CH<sub>A</sub>H<sub>B</sub>CH<sub>2</sub>OH), 1.89-1.76 (2H, m, 3-H<sub>B</sub> and CH<sub>A</sub>H<sub>B</sub>CH<sub>2</sub>OH). **<sup>13</sup>C NMR** (125 MHz, CDCl<sub>3</sub>, one C<sub>q</sub> not observed):  $\delta$  154.9 (N(CO)O), 137.1 (Ar-C<sub>q</sub>), 128.7 (Ar-C), 128.2 (Ar-C), 128.1 (Ar-C), 80.1 (2-C), 67.2 (OCH<sub>2</sub>Ph), 64.1 (CHCH<sub>2</sub>OH), 60.2 (CH<sub>2</sub>CH<sub>2</sub>OH), 57.1 (6-C), 51.6 (4-C), 47.3 (3a-C), 39.8 (3-C), 33.0 (CH<sub>2</sub>CH<sub>2</sub>OH). **IR**  $\nu_{\text{max}}$ (film)/cm<sup>-1</sup> 3401 (OH), 2938, 2880, 1684 (CO), 1422, 1351, 1217, 1100. **HRMS** (ESI): C<sub>17</sub>H<sub>24</sub>NO<sub>5</sub> [M+H]<sup>+</sup>; calculated 322.1649, found 322.1649.

#### 5.4.2.1.2 Preparation of imidazole scaffolds 5 and S16

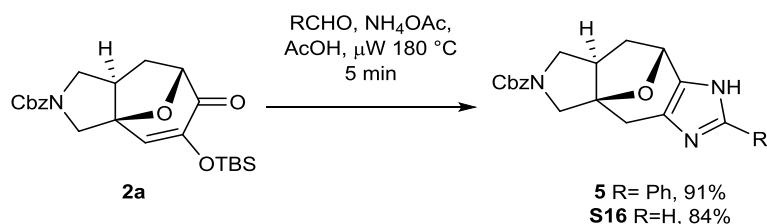

#### Benzyl (1*R*\*,8*R*\*)-5-phenyl-14-oxa-4,6,12-triazatetracyclo[6.5.1.0<sup>1,10</sup>.0<sup>3,7</sup>]tetradeca-3(7),4-diene-12-carboxylate **5**

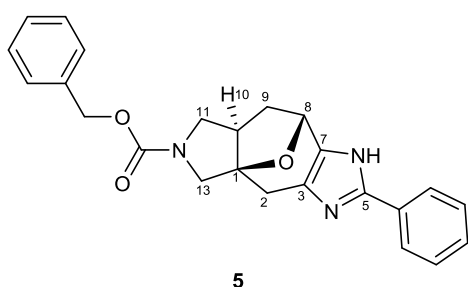

PhCHO (18  $\mu$ L, 0.17 mmol, 1.0 eq.) and NH<sub>4</sub>OAc (135 mg, 1.70 mmol, 10.0 eq.) were added to a suspension of cycloadduct **2a** (75 mg, 0.17 mmol, 1.0 eq.) in AcOH (3.0 mL). The resulting mixture was heated under microwave irradiation at 180 °C for 5 min. The reaction mixture was concentrated *in vacuo*, then partitioned between CH<sub>2</sub>Cl<sub>2</sub> (25 mL) and NaHCO<sub>3</sub> (25 mL). The

phases were separated and the aqueous phase was extracted with CH<sub>2</sub>Cl<sub>2</sub> (2  $\times$  10 mL). The combined organic extracts were dried, filtered and concentrated *in vacuo*. Flash chromatography eluting with 0-100% EtOAc in pentane gave the *title compound* **5** (64 mg, 0.16 mmol, 91%) as a pale brown oil. *R<sub>f</sub>* 0.12 (1:1 petrol–EtOAc). <sup>1</sup>H NMR (500 MHz, CDCl<sub>3</sub>, imidazole NH not observed):  $\delta$  7.76 (2H, d, *J* 7.3, Ar-H), 7.43-7.28 (8H, m, Ar-H), 5.28 (1H, d, *J* 5.7, 8-H), 5.25-5.17 (2H, m, OCH<sub>2</sub>Ph), 4.07 (1H, d, *J* 12.6, 13-H<sub>A</sub>), 3.85-3.73 (1H, m, 11-H<sub>A</sub>), 3.55-3.36 (2H, m, 11-H<sub>B</sub> and 13-H<sub>B</sub>), 3.28-3.16 (1H, m, 2-H<sub>A</sub>), 2.73-2.64 (1H, m, 10-H), 2.61 (1H, d, *J* 15.4, 2-H<sub>B</sub>), 2.58-2.47 (1H, m, 9-H<sub>A</sub>), 2.16-2.05 (1H, m, 9-H<sub>B</sub>). <sup>13</sup>C NMR (125 MHz, CDCl<sub>3</sub>, mixture of two rotamers, 2  $\times$  imidazole C<sub>q</sub> not observed):  $\delta$  154.9 (N(CO)O), 145.6 (5-C), 136.7 (Ar-C<sub>q</sub>), 130.4 (Ar-C<sub>q</sub>), 129.1 (Ar-C), 128.6 (Ar-C), 128.2 (Ar-C), 128.0 (2 peaks, Ar-C), 125.1 (Ar-C), 91.1 (1-C), 90.1 (1-C), 77.4 (8-C), 67.2 (OCH<sub>2</sub>Ph), 55.4 (13-C), 55.0 (13-C), 53.6 (11-C), 53.5 (11-C), 47.1 (10-C), 46.1 (10-C), 45.8 (9-C), 45.6 (9-C), 32.8 (2-C) [23 of 40 expected peaks observed]. IR  $\nu_{\text{max}}$ (film)/cm<sup>-1</sup> 3274, 2241, 1682 (CO), 1448, 1418, 1348, 1116, 909. HRMS (ESI): C<sub>24</sub>H<sub>24</sub>N<sub>3</sub>O<sub>3</sub> [M+H]<sup>+</sup>; calculated 402.1812, found 402.1825.

## Benzyl (1*R*\*,8*R*\*,10*R*\*)-14-oxa-4,6,12-triazatetracyclo[6.5.1.0<sup>1,10</sup>.0<sup>3,7</sup>]tetradeca-3(7),4-diene-12-carboxylate **S16**

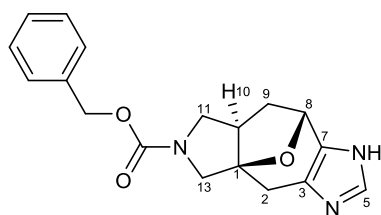

**S16**

In two equally sized batches, p-formaldehyde (2 × 245 mg, 2 × 8.20 mmol, 2.00 eq. [8.20 mmol in each batch, 16.4 mmol overall]) and NH<sub>4</sub>OAc (2 × 3.10 g, 2 × 41.0 mmol, 2 × 10.0 eq. [41.0 mmol in each batch, 82.0 mmol overall]) were added to a suspension of cycloadduct **2a** (2 × 1.75 g, 2 × 4.10 mmol, 2 × 1.00 eq. [4.10 mmol in each batch, 8.20 mmol overall]) in AcOH (2 × 5 mL [5 mL in each batch, 10 mL overall]). Each reaction mixture was stirred at rt for 10 mins, then heated at heated at 180 °C under microwave irradiation for 5 min. The two batches were combined and concentrated *in vacuo*. The residue was diluted in EtOAc (50 mL) and washed with sat. aq. NaHCO<sub>3</sub> (50 mL). The aqueous layer was extracted with EtOAc (4 × 20 mL). The combined organic layers were washed with H<sub>2</sub>O (2 × 25 mL) and brine (25 mL), then dried over MgSO<sub>4</sub>, filtered and concentrated *in vacuo*. Purification by SCX SPE following general procedure **A**, eluting with MeOH, then sat. NH<sub>3</sub>/MeOH, followed by flash chromatography eluting with 90:9:1 CH<sub>2</sub>Cl<sub>2</sub>–EtOH–NH<sub>3</sub>/MeOH gave the *title compound* **S16** (2.24 g, 6.9 mmol, 84%) as a pale brown foam. *R<sub>f</sub>* 0.64 (50:8:1 CH<sub>2</sub>Cl<sub>2</sub>–EtOH–NH<sub>3</sub>/MeOH). <sup>1</sup>H NMR (400 MHz, CDCl<sub>3</sub>, imidazole NH not observed): δ 7.43 (1H, s, 5-H), 7.40-7.28 (5H, m, Cbz Ar-H), 5.25 (1H, d, *J* 5.9, 8-H), 5.16 (1H, d, *J* 13.0, OCH<sub>A</sub>H<sub>B</sub>Ph), 5.11 (1H, d, *J* 13.0, OCH<sub>A</sub>H<sub>B</sub>Ph), 4.06 (1H, d, *J* 12.7, 13-H<sub>A</sub>), 3.82-3.71 (1H, m, 11-H<sub>A</sub>), 3.54-3.34 (2H, m, 11-H<sub>B</sub> and 13-H<sub>B</sub>), 3.26-3.10 (1H, m, 2-H<sub>A</sub>), 2.70-2.61 (1H, m, 10-H), 2.58 (1H, d, *J* 15.4, 2-H<sub>B</sub>), 2.53-2.42 (1H, m, 9-H<sub>A</sub>), 2.15-2.03 (1H, m, 9-H<sub>B</sub>). <sup>13</sup>C NMR (100 MHz, CDCl<sub>3</sub>, mixture of two rotamers, 2 × imidazole C<sub>q</sub> not observed): δ 154.9 (N(CO)O), 136.8 (Cbz Ar-C<sub>q</sub>), 136.7 (Cbz Ar-C<sub>q</sub>), 133.6 (2 peaks, Ar-C), 128.6 (Ar-C), 128.2 (Ar-C), 128.0 (Ar-C), 91.1 (1-C), 90.2 (1-C), 76.4 (8-C), 67.2 (OCH<sub>2</sub>Ph), 55.4 (13-C), 55.0 (13-C), 53.6 (11-C), 47.1 (10-C), 46.1 (10-C), 45.8 (9-C), 45.7 (9-C), 32.7 (2-C) [20 of 32 expected peaks observed]. IR *v*<sub>max</sub>(film)/cm<sup>-1</sup> 2958, 1694 (CO), 1423, 1352, 1239, 1218, 1115, 732. HRMS (ESI): C<sub>18</sub>H<sub>20</sub>N<sub>3</sub>O<sub>3</sub> [M+H]<sup>+</sup>; calculated 326.1499, found 326.1500.



### 5.4.2.1.3 Preparation of silyl-protected amino alcohol scaffold 6

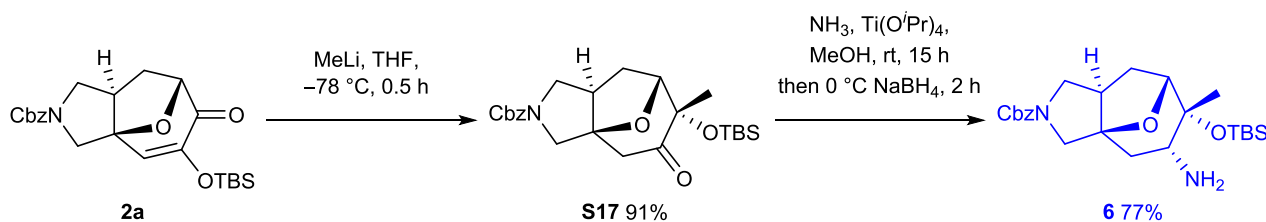

### Benzyl ( $1R^*$ , $5R^*$ , $7R^*$ , $8S^*$ )-8-[(*tert*-butyldimethylsilyl)oxy]-8-methyl-9-oxo-11-oxa-3-azatricyclo[5.3.1.0<sup>1,5</sup>]undecane-3-carboxylate **S17**

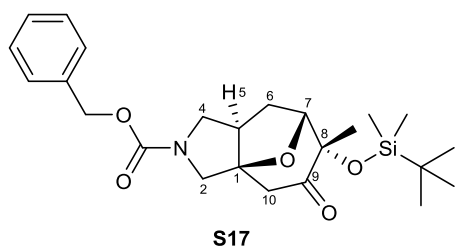

MeLi (1.6 M in Et<sub>2</sub>O, 0.37 mL, 0.60 mmol, 1.30 eq.) was added to a stirred solution of cycloadduct **2a** (200 mg, 0.46 mmol, 1.00 eq.) in THF (15 mL) at  $-78\text{ }^{\circ}\text{C}$ . The reaction mixture was stirred at this temperature for 0.5 h, then sat. aq. brine (1 mL) was added. The reaction mixture was warmed to rt, then partitioned between

EtOAc (25 mL) and brine (25 mL). The aqueous phase was extracted with EtOAc (2 × 10 mL). The combined organic extracts were dried, filtered and concentrated *in vacuo*. Flash chromatography eluting with 95:5 pentane–EtOAc gave the *title compound* **S17** (187 mg, 0.420 mmol, 91%) as a yellow oil.  $R_f$  0.30 (3:1 petrol–EtOAc).  $^1\text{H NMR}$  (500 MHz, CDCl<sub>3</sub>, 50:50 mixture of rotamers):  $\delta$  7.39–7.28 (5H, m, Cbz Ar-H), 5.12 (2H, s, OCH<sub>2</sub>Ph), 4.21–4.15 (1H, m, 7-H), 3.95–3.83 (2H, m, 2-H<sub>B</sub> and 4-H<sub>A</sub>), 3.43 (0.5H, d,  $J$  12.6, 2-H<sub>A</sub>), 3.38 (0.5H, d,  $J$  12.6, 2-H<sub>A</sub>), 3.20–3.09 (1H, m, 4-H<sub>B</sub>), 2.92 (0.5H, d,  $J$  15.3, 10-H<sub>B</sub>), 2.86 (0.5H, d,  $J$  15.3, 10-H<sub>B</sub>), 2.55–2.46 (1H, m, 5-H), 2.37 (0.5H, d,  $J$  3.3, 10-H<sub>A</sub>), 2.34 (0.5H, d,  $J$  3.3, 10-H<sub>A</sub>), 2.27–2.14 (1H, m, 6-H<sub>A</sub>), 1.91–1.76 (1H, m, 6-H<sub>B</sub>), 1.46 (1.5H, s, C<sub>q</sub>CH<sub>3</sub>), 1.45 (1.5H, s, C<sub>q</sub>CH<sub>3</sub>), 0.85 (9H, s, SiC(CH<sub>3</sub>)<sub>3</sub>), 0.17 (3H, s, SiCH<sub>3</sub>), 0.13 (3H, s, SiCH<sub>3</sub>).  $^{13}\text{C NMR}$  (125 MHz, CDCl<sub>3</sub>, mixture of two rotamers):  $\delta$  208.0 (9-C), 207.9 (9-C), 154.4 (N(CO)O), 136.8 (Ar-C<sub>q</sub>), 128.6 (Ar-C), 128.2 (Ar-C), 128.12 (Ar-C), 91.5 (1-C), 90.7 (1-C), 85.4 (7-C), 81.4 (8-C), 67.1 (OCH<sub>2</sub>Ph), 54.2 (2-C or 4-C), 53.8 (2-C or 4-C), 53.7 (2-C or 4-C), 47.3 (10-C), 45.7 (5-C), 44.8 (5-C), 31.7 (6-C), 31.4 (6-C), 26.0 (SiC(CH<sub>3</sub>)<sub>3</sub>), 24.4 (C<sub>q</sub>CH<sub>3</sub>), 18.5 (SiC<sub>q</sub>),  $-2.3$  (SiCH<sub>3</sub>),  $-2.6$  (SiCH<sub>3</sub>) [25 of 38 expected peaks observed]. IR  $\nu_{\text{max}}$ (film)/cm<sup>-1</sup> 2954, 2953, 2930, 2887, 1702 (CO), 1629, 1593, 1419 **HRMS** (ESI): C<sub>24</sub>H<sub>36</sub>NO<sub>5</sub>Si [M+H]<sup>+</sup>; calculated 446.2357, found 446.2360.

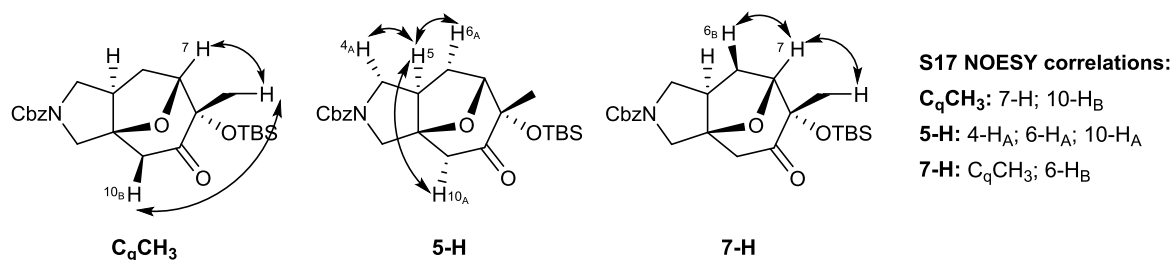

**Benzyl (1*R*\*,5*R*\*,7*R*\*,8*R*\*,9*R*\*)-9-amino-8-[(*tert*-butyldimethylsilyl)oxy]-8-methyl-11-oxa-3-azatricyclo[5.3.1.0<sup>1,5</sup>]undecane-3-carboxylate **6****

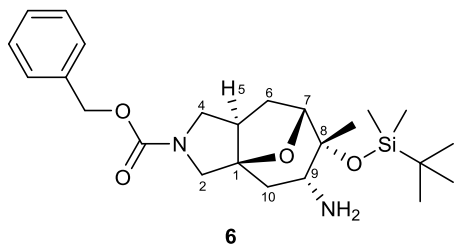

Ti(O<sup>*i*</sup>Pr)<sub>4</sub> (4.30 mL, 14.4 mmol, 2.00 eq.) was added to a stirred solution of compound **S17** (3.21 g, 7.20 mmol, 1.00 eq.) in sat. NH<sub>3</sub>/MeOH (100 mL). The reaction mixture was stirred for 15 h then NaBH<sub>4</sub> (409 mg, 10.8 mmol, 1.5 eq.) was added at 0 °C. The reaction mixture was warmed to rt, stirred for 2 h then

concentrated *in vacuo*. The residue was diluted in EtOAc (50 mL) and sat. aq. brine (50 mL) and stirred vigorously. The phases were separated and the aqueous phase was extracted with EtOAc (2 × 25 mL). The combined organic phase was dried over MgSO<sub>4</sub>, filtered, and concentrated *in vacuo*. Flash chromatography eluting with EtOAc, then 9:1 EtOAc–MeOH, gave the *title compound 6* (2.46 g, 5.51 mmol, 77%) as a colourless oil. **<sup>1</sup>H NMR** (500 MHz, CDCl<sub>3</sub>, 50:50 mixture of rotamers, NH<sub>2</sub> not observed): δ 7.38–7.27 (5H, m, Cbz Ar-H), 5.10 (2H, s, OCH<sub>2</sub>Ph), 4.00 (1H, d, *J* 7.5, 7-H), 3.92–3.82 (1H, m, 4-H<sub>A</sub>), 3.75–3.68 (1H, m, 2-H<sub>B</sub>, includes at δ 3.72: 0.5H, d, *J* 12.5; and at δ 3.71: 0.5H, d, *J* 12.5), 3.38 (0.5H, d, *J* 12.5, 2-H<sub>A</sub>), 3.33 (0.5H, d, *J* 12.5, 2-H<sub>A</sub>), 3.23–3.12 (2H, m, 4-H<sub>B</sub> and 9-H), 3.11–3.03 (1H, m, 5-H), 2.96–2.87 (1H, m, 6-H<sub>A</sub>), 2.16 (0.5H, dd, *J* 14.2, 5.4, 10-H<sub>B</sub>), 2.11 (0.5H, dd, *J* 14.2, 5.4, 10-H<sub>B</sub>), 1.72–1.60 (1H, m, 6-H<sub>B</sub>), 1.57–1.50 (1H, m, 10-H<sub>A</sub>, includes at δ 1.54: 0.5H, d, *J* 14.2; and at δ 1.53: 0.5H, d, *J* 14.2), 1.37 (1.5H, s, C<sub>q</sub>CH<sub>3</sub>), 1.36 (1.5H, s, C<sub>q</sub>CH<sub>3</sub>), 0.91 (9H, s, SiC(CH<sub>3</sub>)<sub>3</sub>), 0.13 (3H, s, SiCH<sub>3</sub>), 0.12–0.10 (3H, m, SiCH<sub>3</sub>). **<sup>13</sup>C NMR** (125 MHz, DMSO-*d*<sub>6</sub>, mixture of two rotamers): δ 153.6 (N(CO)O), 153.4 (N(CO)O), 137.1 (Ar-C<sub>q</sub>), 128.4 (Ar-C), 127.7 (Ar-C), 127.5 (Ar-C), 89.3 (1-C), 88.4 (1-C), 83.2 (7-C), 73.1 (8-C), 65.7 (OCH<sub>2</sub>Ph), 54.7 (2-C or 4-C), 54.6 (2-C or 4-C), 54.1 (2-C or 4-C), 54.0 (2-C or 4-C), 53.8 (9-C), 44.4 (5-C), 43.4 (5-C), 36.7 (10-C), 36.6 (10-C), 32.9 (6-C), 32.8 (6-C), 27.5 (C<sub>q</sub>CH<sub>3</sub>), 25.8 (SiC(CH<sub>3</sub>)<sub>3</sub>), 18.0 (SiC<sub>q</sub>), –2.0 (SiCH<sub>3</sub>), –2.2 (SiCH<sub>3</sub>) [27 of 38 expected peaks observed]. **IR**  $\nu_{\max}$ (film)/cm<sup>–1</sup> 2952, 2931, 2882, 2856, 1704 (CO), 1419, 1362, 1346. **HRMS** (ESI): C<sub>24</sub>H<sub>39</sub>N<sub>2</sub>O<sub>4</sub>Si [M+H]<sup>+</sup>; calculated 447.2674, found 447.2679.

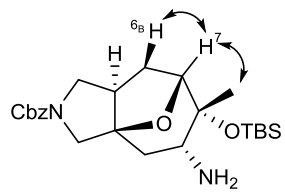

7-H

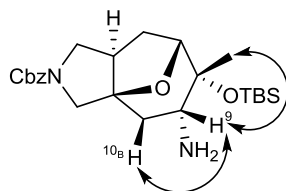

9-H

**6 NOESY correlations:**

**Me:** 7-H; 9-H

**7-H:** Me; 6-H<sub>B</sub>

**9-H:** Me; 10-H<sub>B</sub>

#### 5.4.2.1.4 Preparation of oxazolidinone scaffold 8

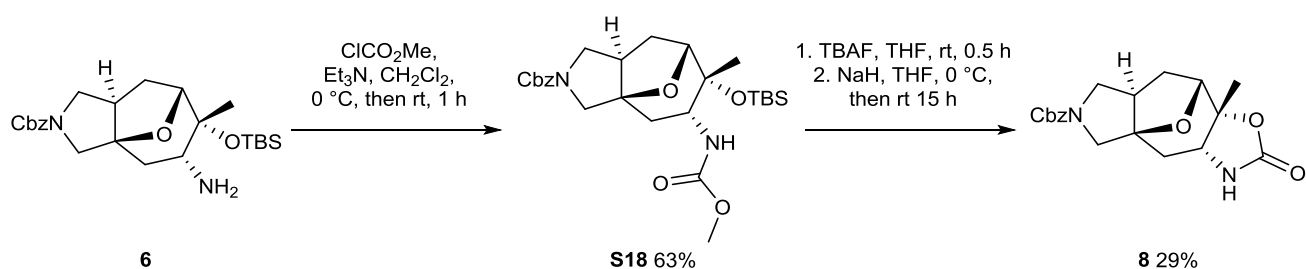

#### Benzyl (1*R*\*,5*R*\*,7*R*\*,8*R*\*,9*R*\*)-8-[(*tert*-butyldimethylsilyl)oxy]-9-[(methoxycarbonyl)amino]-8-methyl-11-oxa-3-azatricyclo[5.3.1.0<sup>1,5</sup>]undecane-3-carboxylate **S18**

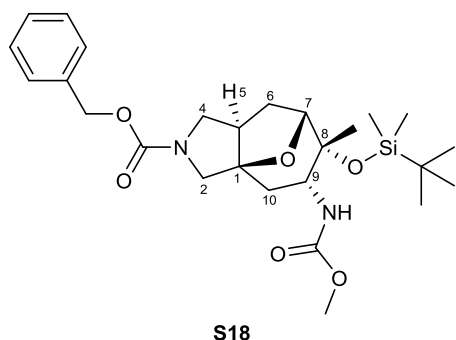

Methyl chloroformate (2.1 mL, 28 mmol, 5.0 eq.) was added to a stirred solution of compound **6** (2.5 g, 5.5 mmol, 1.0 eq.) and Et<sub>3</sub>N (3.8 mL, 28 mmol, 5.0 eq.) in CH<sub>2</sub>Cl<sub>2</sub> (50 mL) at 0 °C. The reaction mixture was warmed to rt and stirred for 1 h. The reaction mixture was washed with sat. NH<sub>4</sub>Cl solution (25 mL). The aqueous layer was extracted with CH<sub>2</sub>Cl<sub>2</sub> (2 × 20 mL). The combined organic phases were washed with brine (25 mL), then

dried over MgSO<sub>4</sub>, filtered, and concentrated *in vacuo*. Flash chromatography eluting with 0-20% EtOAc in pentane gave the *title compound* **S18** (1.74 g, 3.44 mmol, 63%) as a colourless oil. *R<sub>f</sub>* 0.19 (4:1 pentane–EtOAc). <sup>1</sup>H NMR (400 MHz, CDCl<sub>3</sub>, 50:50 mixture of rotamers): δ 7.38-7.28 (5H, m, Cbz Ar-H), 5.50 (1H, s, NH), 5.10 (2H, s, OCH<sub>2</sub>Ph), 4.00 (1H, d, *J* 7.3, 7-H), 3.93-3.79 (1H, m, 4-H<sub>A</sub>), 3.77-3.60 (4H, m, includes: 1H, 2-H<sub>A</sub>; and at δ 3.66: 3H, s, NHCO<sub>2</sub>CH<sub>3</sub>), 3.57-3.50 (1H, m, 9-H), 3.37 (0.5H, d, *J* 12.6, 2-H<sub>B</sub>), 3.33 (0.5H, d, *J* 12.6, 2-H<sub>B</sub>), 3.23-3.10 (1H, m, 4-H<sub>B</sub>), 2.94-2.81 (1H, m, 5-H), 2.50-2.37 (1H, m, 6-H<sub>A</sub>), 2.27-2.16 (1H, m, 10-H<sub>A</sub>), 2.16-2.01 (1H, m, 10-H<sub>B</sub>), 1.84-1.69 (1H, m, 6-H<sub>B</sub>), 1.47 (3H, s, C<sub>q</sub>CH<sub>3</sub>), 0.91 (9H, s, SiC(CH<sub>3</sub>)<sub>3</sub>), 0.13 (3H, s, SiCH<sub>3</sub>), 0.11 (3H, s, SiCH<sub>3</sub>). <sup>13</sup>C NMR (100 MHz, CDCl<sub>3</sub>, mixture of two rotamers): δ 157.5 (NH(CO)O), 154.4 (N(CO)O), 137.0 (Ar-C<sub>q</sub>), 128.6 (Ar-C), 128.1 (Ar-C), 128.0 (Ar-C), 90.0 (1-C), 89.1 (1-C), 84.2 (7-C), 71.8 (8-C), 66.9 (OCH<sub>2</sub>Ph), 55.1 (2-C or 4-C), 55.0 (2-C or 4-C), 54.7 (2-C or 4-C), 54.6 (2-C or 4-C), 54.3 (9-C), 52.2 (NHCO<sub>2</sub>CH<sub>3</sub>), 43.9 (5-C), 43.0 (5-C), 34.4 (10-C), 33.1 (6-C), 32.9 (6-C), 27.5 (C<sub>q</sub>CH<sub>3</sub>), 26.0 (SiC(CH<sub>3</sub>)<sub>3</sub>), 18.4 (SiC<sub>q</sub>), -1.7 (SiCH<sub>3</sub>), -2.2 (SiCH<sub>3</sub>) [27 of 42 expected peaks observed]. IR *v*<sub>max</sub>(film)/cm<sup>-1</sup> 2953, 2884, 2857, 1728, 1707, 1419, 1055, 834. HRMS (ESI): C<sub>26</sub>H<sub>41</sub>N<sub>2</sub>O<sub>6</sub>Si [M+H]<sup>+</sup>; calculated 505.2728, found 505.2735.

**Benzyl (1*R*\*,3*R*\*,7*R*\*,8*R*\*,10*R*\*)-7-methyl-5-oxo-6,14-dioxo-4,12-diazatetracyclo[6.5.1.0<sup>1,10</sup>.0<sup>3,7</sup>]tetradecane-12-carboxylate **8****

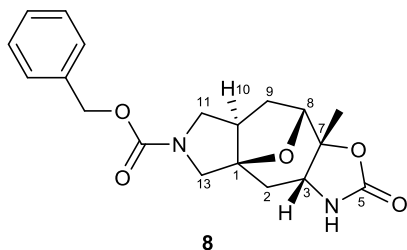

TBAF (1.0 M in THF, 6.7 mL, 6.7 mmol, 2.0 eq.) was added to a stirred solution of compound **S18** (1.70 g, 3.37 mmol, 1.00 eq) in THF (50 mL). The reaction mixture was stirred for 0.5 h then concentrated *in vacuo*. The residue was subjected to by SCX SPE following general procedure **A**, eluting with MeOH. The resulting residue was dissolved in DMF (50 mL), and NaH (60% dispersion in oil, 408 mg, 10.2 mmol, 3.0 eq.) was added at 0 °C. The reaction mixture was warmed to rt and stirred for 15 h. The reaction mixture was quenched by the addition of sat. aq. NH<sub>4</sub>Cl solution (5 mL). The reaction mixture was diluted in EtOAc (50 mL) and washed with H<sub>2</sub>O (50 mL). The aqueous layer was extracted with EtOAc (2 × 25 mL). The combined organic layers were dried over dried over MgSO<sub>4</sub>, filtered, and concentrated *in vacuo*. Flash chromatography eluting with 98:2:0.1 CH<sub>2</sub>Cl<sub>2</sub>–EtOH–NH<sub>3</sub>/MeOH gave the *title compound* **8** (356 mg, 0.99 mmol, 29%) as a colourless oil. *R<sub>f</sub>* 0.30 (98:2:0.1 CH<sub>2</sub>Cl<sub>2</sub>–EtOH–NH<sub>3</sub>/MeOH). **<sup>1</sup>H NMR** (500 MHz, CDCl<sub>3</sub>, 50:50 mixture of rotamers): δ 7.37-7.28 (5H, m, Cbz Ar-H), 6.01 (0.5H, s, NH), 5.91 (0.5H, s, NH), 5.11 (1H, 2 peaks, 2 × s, OCH<sub>2</sub>Ph), 4.29 (1H, d, *J* 7.7, 8-H), 3.93-3.85 (1H, m, 11-H<sub>A</sub>), 3.85-3.77 (2H, m, 3-H and 13-H<sub>A</sub>), 3.39 (0.5H, d, *J* 12.6, 13-H<sub>B</sub>), 3.33 (0.5H, d, *J* 12.6, 13-H<sub>B</sub>), 3.30-3.17 (1H, m, 11-H<sub>B</sub>), 2.88-2.78 (1H, m, 10-H), 2.45-2.34 (1H, m, 9-H<sub>A</sub>), 2.17 (0.5H, app. dd, *J* 15.0, 5.7, 2-H<sub>A</sub>), 2.11 (0.5H, app. dd, *J* 15.0, 5.7, 2-H<sub>A</sub>), 1.94-1.80 (2H, m, includes: 1H, 9-H<sub>B</sub>; and at δ 1.85: 1H, d, *J* 15.0, 2-H<sub>B</sub>), 1.58 (3H, s, C<sub>q</sub>CH<sub>3</sub>). **<sup>13</sup>C NMR** (125 MHz, CDCl<sub>3</sub>, mixture of two rotamers): δ 159.4 (5-C), 154.5 (N(CO)O), 136.8 (Ar-C<sub>q</sub>), 128.6 (Ar-C), 128.2 (Ar-C), 128.1 (Ar-C), 89.4 (1-C), 88.6 (1-C), 82.7 (8-C), 78.9 (7-C), 67.1 (OCH<sub>2</sub>Ph), 55.4 (3-C), 55.2 (11-C or 13-C), 55.1 (11-C or 13-C), 54.8 (11-C or 13-C), 54.7 (11-C or 13-C), 45.1 (10-C), 44.1 (10-C), 34.0 (2-C), 33.4 (9-C), 33.1 (9-C), 24.7 (C<sub>q</sub>CH<sub>3</sub>) [22 of 34 expected peaks observed]. **IR** *v*<sub>max</sub>(film)/cm<sup>-1</sup> 3282, 2939, 2884, 1759, 1701, 1421, 1109. **HRMS** (ESI): C<sub>19</sub>H<sub>23</sub>N<sub>2</sub>O<sub>5</sub> [M+H]<sup>+</sup>; calculated 359.1601, found 359.1603.

### 5.4.2.1.5 Preparation of pyrazine scaffold 9

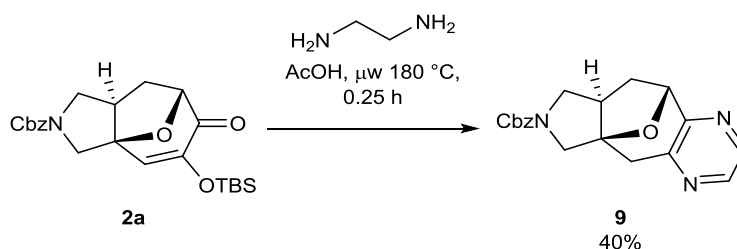

### Benzyl (1*R*\*,9*R*\*,11*R*\*)-15-oxa-4,7,13-triazatetracyclo[7.5.1.0<sup>1,11</sup>.0<sup>3,8</sup>]pentadeca-3(8),4,6-triene-13-carboxylate 9

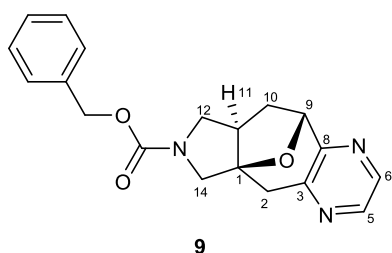

In two equally sized batches, ethylene diamine (2 × 0.55 mL, 2 × 8.20 mmol, 2 × 2.00 eq. [8.20 mmol in each batch, 16.4 mmol overall]) was added to a suspension of cycloadduct **2a** (2 × 1.75 g, 2 × 4.10 mmol, 2 × 1.0 eq. [4.10 mmol in each batch, 8.20 mmol overall]) in AcOH (2 × 5 mL [5 mL in each batch, 10 mL overall]). Each reaction mixture was stirred at rt for 10 mins, then heated at 180 °C under microwave irradiation for 15 min. The two batches were combined and concentrated *in vacuo*. The residue was diluted in EtOAc (50 mL) and washed with sat. aq. NaHCO<sub>3</sub> (50 mL). The aqueous layer was extracted with EtOAc (4 × 20 mL). The combined organic layers were washed with H<sub>2</sub>O (2 × 25 mL) and brine (25 mL), then dried over MgSO<sub>4</sub>, filtered and concentrated *in vacuo*. Flash chromatography eluting with 98:2:0.1 CH<sub>2</sub>Cl<sub>2</sub>–EtOH–NH<sub>3</sub>/MeOH gave the *title compound* **9** (1.1 g, 3.3 mmol, 40%) as a colourless amorphous solid. *R<sub>f</sub>* 0.17 (98:2:0.1 CH<sub>2</sub>Cl<sub>2</sub>–EtOH–NH<sub>3</sub>/MeOH). <sup>1</sup>H NMR (400 MHz, CDCl<sub>3</sub>): δ 8.41 (1H, d, *J* 2.6, 5-H or 6-H), 8.30 (1H, d, *J* 2.6, 5-H or 6-H), 7.41–7.28 (5H, m, Cbz Ar-H), 5.30 (1H, d, *J* 6.8, 9-H), 5.21–5.08 (2H, m, OCH<sub>2</sub>Ph), 4.09 (1H, d, *J* 12.7, 14-H<sub>A</sub>), 3.90 (1H, dd, *J* 11.4, 9.3, 12-H<sub>B</sub>), 3.62–3.34 (3H, m, 2-H<sub>A</sub>, 12-H<sub>A</sub> and 14-H<sub>B</sub>), 2.93 (1H, d, *J* 17.6, 2-H<sub>B</sub>), 2.78–2.64 (1H, m, 11-H), 2.48–2.34 (1H, m, 10-H<sub>A</sub>), 2.34–2.19 (1H, m, 10-H<sub>B</sub>). <sup>13</sup>C NMR (100 MHz, CDCl<sub>3</sub>, mixture of two rotamers): δ 155.4 (8-C), 154.6 (N(CO)O), 149.3 (3-C), 143.6 (5-C or 6-C), 141.7 (5-C or 6-C), 136.8 (Ar-C<sub>q</sub>), 128.6 (Ar-C), 128.2 (Ar-C), 128.1 (Ar-C), 91.2 (1-C), 90.3 (1-C), 80.6 (9-C), 67.2 (OCH<sub>2</sub>Ph), 66.9 (OCH<sub>2</sub>Ph), 55.1 (14-C), 54.7 (14-C), 54.4 (12-C), 54.1 (12-C), 46.7 (11-C), 45.7 (11-C), 43.4 (10-C), 43.2 (10-C), 39.5 (2-C) [23 of 34 expected peaks observed]. IR  $\nu_{\text{max}}$ (film)/cm<sup>-1</sup> 2953, 2880, 1703 (CO), 1420, 1349, 1190, 699. HRMS (ESI): C<sub>19</sub>H<sub>20</sub>N<sub>3</sub>O<sub>3</sub> [M+H]<sup>+</sup>; calculated 338.1499, found 338.1503.

#### 5.4.2.1.6 Preparation of piperazine scaffolds S19-S20

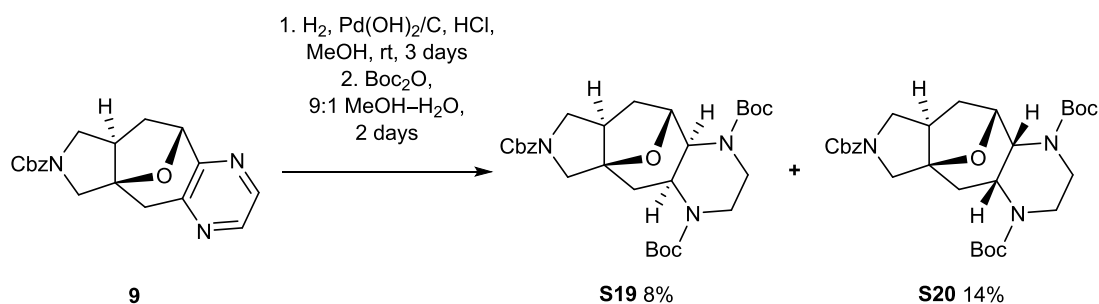

#### 4,7,13-Tri-*tert*-butyl (1*R*\*,3*S*\*,8*S*\*,9*R*\*,11*R*\*)-15-oxa-4,7,13-triazatetracyclo[7.5.1.0<sup>1,11</sup>.0<sup>3,8</sup>]pentadecane-4,7,13-tricarboxylate **S19** and 4,7,13-tri-*tert*-butyl (1*R*\*,3*R*\*,8*R*\*,9*R*\*,11*R*\*)-15-oxa-4,7,13-triazatetracyclo[7.5.1.0<sup>1,11</sup>.0<sup>3,8</sup>]pentadecane-4,7,13-tricarboxylate **S20**

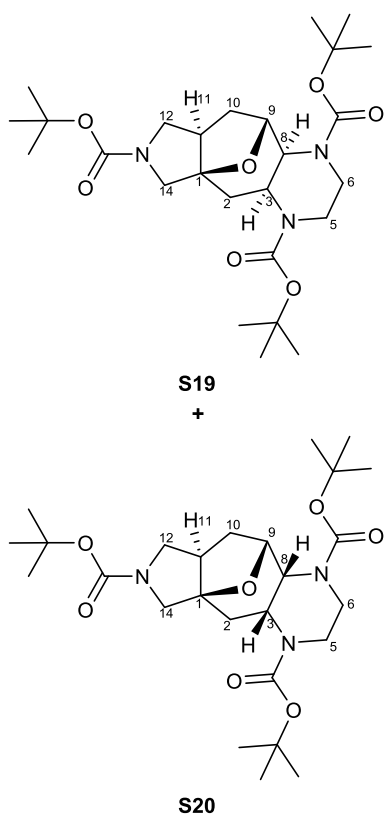

Hydrogenation was carried out following general procedure **B**, using pyrazine **9** (1.1 g, 3.3 mmol, 1.0 eq.), Pd(OH)<sub>2</sub>/C (2 × 200 mg,\* 20% w/w) and conc. HCl (12 M, 0.4 mL) in MeOH (20 mL) over 4 days. The residue was purified by SCX SPE following general procedure **A**, eluting first with MeOH, then sat. NH<sub>3</sub>/MeOH to give a brown oil. The residue (404 mg, [estimate 1.90 mmol of the triamine, 1.00 eq.]) was dissolved in 9:1 MeOH-H<sub>2</sub>O (25 mL) and Boc<sub>2</sub>O (1.90 g, 8.70 mmol, 4.50 eq.) was added. The reaction mixture was stirred for 2 days, then concentrated *in vacuo*. Flash chromatography eluting with 4:6 pentane-EtOAc gave the *title compounds* **S19** (134 mg, 0.26 mmol, 8%, 2 steps) and **S20** (234 mg, 0.46 mmol, 14%) as colourless amorphous solids.

#### 4,7,13-Tri-*tert*-butyl(1*R*\*,3*S*\*,8*S*\*,9*R*\*,11*R*\*)-15-oxa-4,7,13-triazatetracyclo[7.5.1.0<sup>1,11</sup>.0<sup>3,8</sup>]pentadecane-4,7,13-tricarboxylate

**S19**: *R*<sub>f</sub> 0.55 (4:6 pentane-EtOAc). <sup>1</sup>H NMR (500 MHz, MeOD-d<sub>4</sub>, 333 K): δ 4.77 (1H, d, *J* 8.1, 9-H), 4.65-4.48 (1H, m, 3-H), 4.20-4.07 (1H, m, 5-H<sub>A</sub>), 3.82 (1H, dd, *J* 10.9, 9.9, 12-H<sub>A</sub>), 3.70 (1H, app. d, *J* 7.1, 8-H), 3.65 (1H, d, *J* 12.6, 14-H<sub>A</sub>), 3.55-3.40 (2H, m, 5-H<sub>B</sub> and 6-H<sub>A</sub>), 3.34-3.29 (2H, 6-H<sub>B</sub> and 14-H<sub>B</sub>), 3.03 (1H, dd, *J* 10.9, 7.9, 12-H<sub>B</sub>), 2.80-2.57 (1H, m, 11-H), 2.11-1.89 (4H, m, 2-H and 10-H), 1.48 (9H, s, NCO<sub>2</sub>C(CH<sub>3</sub>)<sub>3</sub>), 1.47 (9H, s,

\* The reaction mixture was filtered and exposed to fresh catalyst after 3 days.

NCO<sub>2</sub>C(CH<sub>3</sub>)<sub>3</sub>), 1.45 (9H, s, NCO<sub>2</sub>C(CH<sub>3</sub>)<sub>3</sub>). <sup>13</sup>C NMR (100 MHz, MeOD-d<sub>4</sub>, 298 K, mixture of 2 rotamers): δ 156.9 (N(CO)O), 156.4 (N(CO)O), 155.9 (N(CO)O), 91.0 (1-C), 90.1 (1-C), 81.9 (NCO<sub>2</sub>C<sub>q</sub>(CH<sub>3</sub>)<sub>3</sub>), 81.8 (NCO<sub>2</sub>C<sub>q</sub>(CH<sub>3</sub>)<sub>3</sub>), 81.6 (9-C), 81.1 (NCO<sub>2</sub>C<sub>q</sub>(CH<sub>3</sub>)<sub>3</sub>), 56.3 (8-C), 56.2 (14-C), 56.1 (14-C), 55.7 (12-C), 55.3 (12-C), 45.0 (11-C), 44.1 (11-C), 43.8 (6-C), 43.7 (3-C), 43.3 (6-C), 39.2 (5-C), 37.4 (10-C), 36.9 (10-C), 34.6 (2-C), 34.5 (2-C), 28.7 (NCO<sub>2</sub>C(CH<sub>3</sub>)<sub>3</sub>), 28.6 (2 peaks, 2 × NCO<sub>2</sub>C(CH<sub>3</sub>)<sub>3</sub>) [27 of 40 expected peaks observed]. IR  $\nu_{\text{max}}$ (film)/cm<sup>-1</sup> 2974, 2932, 1683 (CO), 1392, 1364, 1157, 1112, 729. HRMS (ESI): C<sub>26</sub>H<sub>44</sub>N<sub>3</sub>O<sub>7</sub> [M+H]<sup>+</sup>; calculated 510.3174, found 510.3190.

**4,7,13-Tri-*tert*-butyl(1*R*<sup>\*</sup>,3*R*<sup>\*</sup>,8*R*<sup>\*</sup>,9*R*<sup>\*</sup>,11*R*<sup>\*</sup>)-15-oxa-4,7,13-**

**triazatetracyclo[7.5.1.0<sup>1,11</sup>.0<sup>3,8</sup>]pentadecane-4,7,13-tricarboxylate S20:** R<sub>f</sub> 0.46 (4:6 pentane–EtOAc). <sup>1</sup>H NMR (500 MHz, CHCl<sub>3</sub>, 330 K): δ 4.84 (1H, app. t, *J* 7.6, 9-H), 4.44 (1H, dd, *J* 17.3, 8.1, 3-H), 4.36 (1H, app. t, *J* 7.8, 8-H), 4.01 (1H, d, *J* 13.3, 6-H<sub>A</sub>), 3.83 (1H, d, *J* 12.2, 14-H<sub>A</sub>), 3.77 (1H, app. t, *J* 9.8, 12-H<sub>A</sub>), 3.56 (1H, ddd, *J* 12.6, 10.8, 5.4, 5-H<sub>A</sub>), 3.37 (1H, dt, *J* 12.6, 4.0, 5-H<sub>B</sub>), 3.29-3.21 (2H, m, 6-H<sub>B</sub> and 14-H<sub>B</sub>), 3.15-3.06 (1H, m, 12-H<sub>B</sub>), 2.50 (1H, qd, *J* 8.2, 3.0, 11-H), 2.39 (1H, dd, *J* 14.1, 7.8, 2-H<sub>A</sub>), 2.26 (1H, dd, *J* 13.4, 8.4, 10-H<sub>A</sub>), 1.82 (1H, dd, *J* 14.1, 9.3, 2-H<sub>B</sub>), 1.78-1.70 (1H, m, 10-H<sub>B</sub>), 1.48 (9H, s, NCO<sub>2</sub>C(CH<sub>3</sub>)<sub>3</sub>), 1.48 (9H, s, NCO<sub>2</sub>C(CH<sub>3</sub>)<sub>3</sub>), 1.45 (9H, s, NCO<sub>2</sub>C(CH<sub>3</sub>)<sub>3</sub>). <sup>13</sup>C NMR (100 MHz, CHCl<sub>3</sub>, 298 K, mixture of 2 rotamers): δ 155.1 (N(CO)O), 154.8 (N(CO)O), 154.1 (N(CO)O), 88.6 (1-C), 87.8 (1-C), 80.7 (NCO<sub>2</sub>C<sub>q</sub>(CH<sub>3</sub>)<sub>3</sub>), 80.4 (9-C), 79.5 (NCO<sub>2</sub>C<sub>q</sub>(CH<sub>3</sub>)<sub>3</sub>), 78.5 (NCO<sub>2</sub>C<sub>q</sub>(CH<sub>3</sub>)<sub>3</sub>), 55.6 (12-C), 55.3 (12-C), 54.4 (14-C), 54.0 (14-C), 52.8 (8-C), 48.4 (11-C), 47.4 (11-C), 44.0 (3-C), 42.4 (5-C and 6-C), 35.7 (2-C), 31.0 (10-C), 30.6 (10-C), 28.5 (NCO<sub>2</sub>C(CH<sub>3</sub>)<sub>3</sub>), 28.5 (NCO<sub>2</sub>C(CH<sub>3</sub>)<sub>3</sub>), 28.4 (NCO<sub>2</sub>C(CH<sub>3</sub>)<sub>3</sub>) [24 of 40 expected peaks observed]. IR  $\nu_{\text{max}}$ (film)/cm<sup>-1</sup> 2976, 2933, 2882, 1682, 1393, 1365, 1160, 1114, 909, 727. HRMS (ESI): C<sub>26</sub>H<sub>44</sub>N<sub>3</sub>O<sub>7</sub> [M+H]<sup>+</sup>; calculated 510.3174, found 510.3183.



#### 5.4.2.1.7 Preparation of quinoxaline scaffold S21

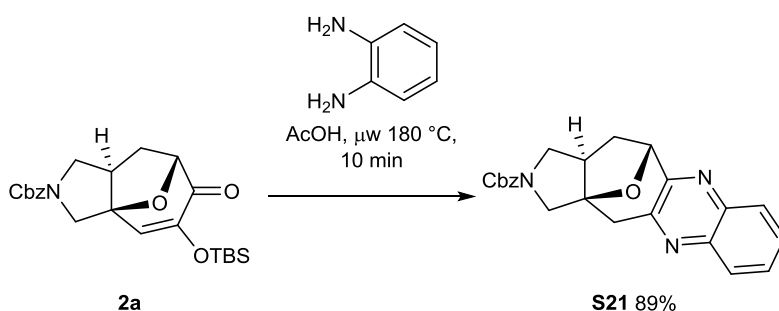

#### Benzyl (1*R*\*,13*R*\*,15*R*\*)-19-oxa-4,11,17-triazapentacyclo

#### [11.5.1.0<sup>1,15</sup>.0<sup>3,12</sup>.0<sup>5,10</sup>]nonadeca-3,5(10),6,8,11-pentaene-17-carboxylate **S21**

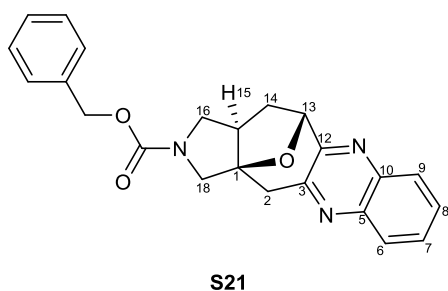

1,2-Diaminobenzene (270 mg, 2.50 mmol, 1.10 eq.) was added to a stirred suspension of cycloadduct **2a** (1.0 g, 2.3 mmol, 1.0 eq.) in AcOH (10 mL). The reaction mixture was heated under microwave irradiation at 180 °C for 10 min. The reaction mixture was concentrated *in vacuo* then partitioned between CH<sub>2</sub>Cl<sub>2</sub> (25 mL) and sat. aq. NaHCO<sub>3</sub> (25 mL). The aqueous phase was extracted with CH<sub>2</sub>Cl<sub>2</sub> (2 × 10 mL). The combined organic phases were dried, filtered and concentrated *in vacuo*. Flash chromatography eluting with 0-100% EtOAc in pentane gave the *title compound* **S21** (789 mg, 2.04 mol, 89%) as a colourless oil. *R<sub>f</sub>* 0.51 (1:2 petrol–EtOAc). <sup>1</sup>H NMR (500 MHz, CDCl<sub>3</sub>): δ 8.02-7.97 (2H, m, 6-H and 9-H), 7.75-7.69 (2H, m, 7-H and 8-H), 7.42-7.30 (5H, m, Cbz Ar-H), 5.50 (1H, d, *J* 6.8, 13-H), 5.17 (1H, s, OCH<sub>2</sub>Ph), 5.16 (1H, s, OCH<sub>2</sub>Ph), 4.14 (1H, d, *J* 12.7, 18-H<sub>A</sub>), 3.93 (1H, dd, *J* 11.3, 9.4, 16-H<sub>A</sub>), 3.71-3.53 (2H, m, 2-H<sub>A</sub> and 18-H<sub>B</sub>), 3.53-3.37 (1H, m, 16-H<sub>B</sub>), 3.15 (1H, d, *J* 17.8, 2-H<sub>B</sub>), 2.83-2.70 (1H, m, 15-H), 2.49-2.30 (2H, m, 14-H). <sup>13</sup>C NMR (125 MHz, CDCl<sub>3</sub>, mixture of two rotamers): δ 154.9 (2 peaks, Ar-C<sub>q</sub>), 154.7 (N(CO)O), 150.0 (Ar-C<sub>q</sub>), 142.3 (Ar-C<sub>q</sub>), 140.7 (Ar-C<sub>q</sub>), 136.8 (Cbz Ar-C<sub>q</sub>), 129.9 (2 peaks, 2 × Ar-C), 129.0 (Ar-C), 128.7 (2 peaks, 2 × Ar-C), 128.2 (2 peaks, 2 × Ar-C), 91.4 (1-C), 90.5 (1-C), 81.3 (13-C), 67.2 (OCH<sub>2</sub>Ph), 55.3 (16-C or 18-C), 54.9 (16-C or 18-C), 54.5 (16-C or 18-C), 54.2 (16-C or 18-C), 46.6 (15-C), 45.6 (15-C), 42.8 (2-C), 42.4 (2-C), 40.4 (14-C) [27 of 42 expected peaks observed]. IR  $\nu_{\text{max}}$ (film)/cm<sup>-1</sup> 2952, 2884, 1702 (CO), 1421, 1358, 1274, 1112, 769. HRMS (ESI): C<sub>23</sub>H<sub>22</sub>N<sub>3</sub>O<sub>3</sub> [M+H]<sup>+</sup>; calculated 388.1656, found 388.1660.

### 5.4.2.2 Scaffolds derived from cycloadduct 2b

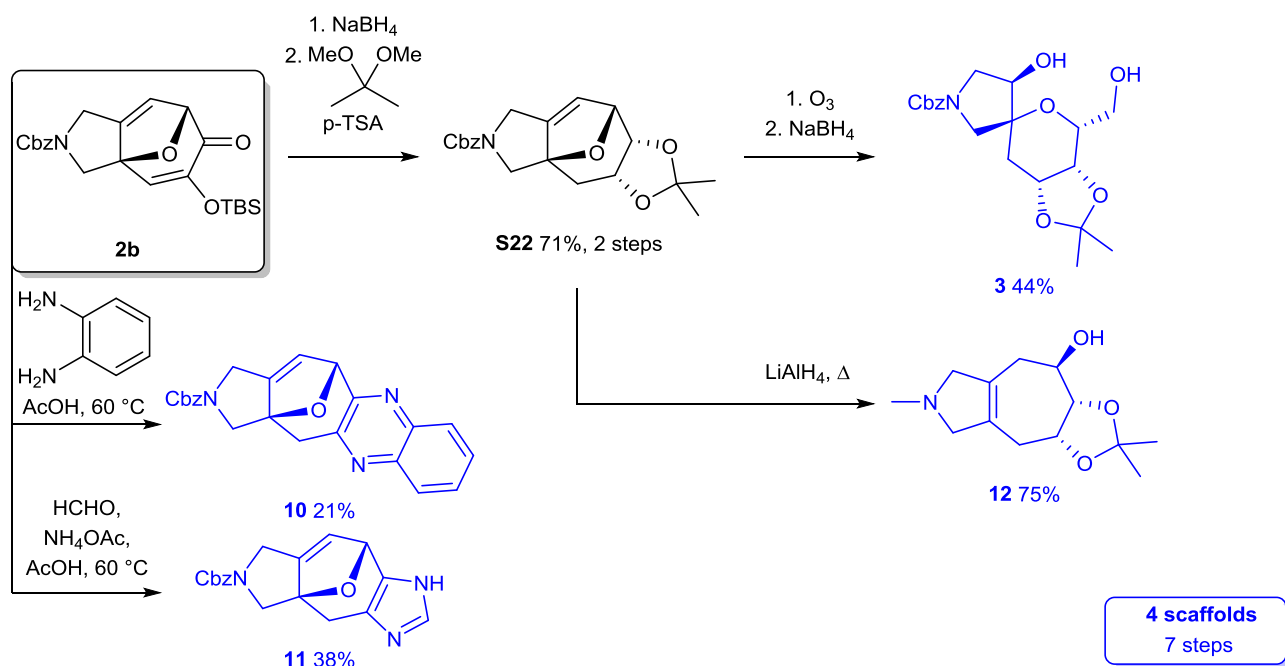

#### 5.4.2.2.1 Preparation of spirocyclic scaffold 3 and scaffold 12

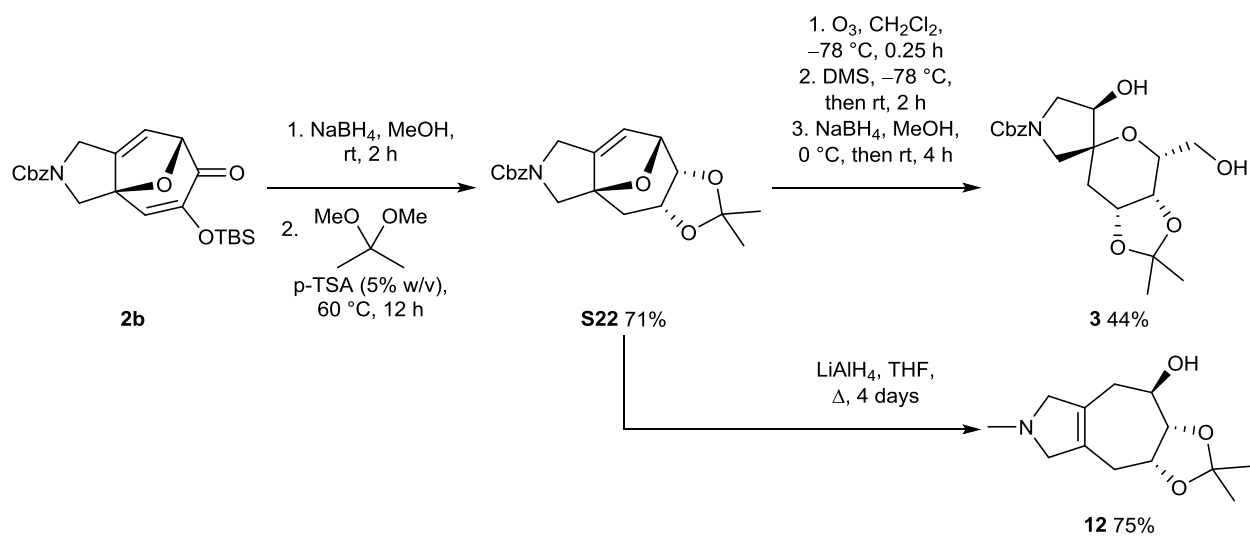

**Benzyl (1*R*\*,3*R*\*,7*R*\*,8*R*\*)-5,5-dimethyl-4,6,14-trioxa-12-azatetracyclo[6.5.1.0<sup>1,10</sup>.0<sup>3,7</sup>]tetradec-9-ene-12-carboxylate **S22****

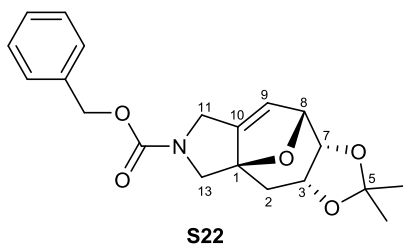

NaBH<sub>4</sub> (0.196 g, 5.20 mmol, 2.0 eq) was added slowly over 10 min to a solution of cycloadduct **2b** (1.11 g, 2.60 mmol, 1.0 eq) in MeOH (43 mL) at room temperature (n.b the substrate is not soluble in cold solvent). The reaction mixture was stirred for 2 h before being quenched by the addition of H<sub>2</sub>O (1.0 mL) and concentrated *in vacuo*.

The resulting product was then suspended in 2,2-dimethoxy propane (43 mL) and to this was added p-toluenesulfonic acid (2.15 g, 5% w/v). The reaction mixture heated at 60 °C for 12 h before being diluted with EtOAc (50 mL) and washed with saturated aqueous NaHCO<sub>3</sub> (100 mL). The phases were separated and the aqueous phase extracted with EtOAc (50 mL). The combined organic phase was then washed with water (100 mL) and brine (100 mL), dried (MgSO<sub>4</sub>), filtered and concentrated *in vacuo*. The crude product was purified by flash column chromatography (dry load), eluting with 65:35 petrol–EtOAc to furnish the *title compound* **S22** (662 mg, 1.85 mmol, 71%) as a pale yellow amorphous solid. *R<sub>f</sub>* 0.30 (7:3 petrol–EtOAc). **<sup>1</sup>H NMR** (500 MHz, CDCl<sub>3</sub>): δ (500 MHz, DMSO-d<sub>6</sub>, 343 K) 7.37-7.30 (5H, m, Cbz Ar-H), 5.94 (1H, app. s, 9-H), 5.10 (2H, s, OCH<sub>2</sub>Ph), 4.90 (1H, dd, *J* 5.4, 1.5, 8-H), 4.52 (1H, app. t, *J* 6.8, 3-H), 4.18 (1H, dd, *J* 6.6, 5.7, 7-H), 4.09 (1H, d, *J* 14.4, 11-H<sub>A</sub>), 3.90 (1H, d, *J* 14.4, 11-H<sub>B</sub>), 3.50 (1H, d, *J* 10.9, 13-H<sub>A</sub>), 3.29-3.24 (1H, m, 13-H<sub>B</sub>), 2.16 (1H, dd, *J* 15.0, 6.8, 2-H<sub>B</sub>), 1.94 (1H, app. d, *J* 15.0, 2-H<sub>A</sub>), 1.32 (3H, s, acetonide CH<sub>3</sub>), 1.23 (3H, s, acetonide CH<sub>3</sub>). **<sup>13</sup>C NMR** (125 MHz, DMSO-d<sub>6</sub>, 343 K): δ 153.6 (N(CO)O), 136.5 (Ar-C<sub>q</sub>), 127.9 (Ar-C), 127.3 (Ar-C), 126.9 (Ar-C), 122.1 (9-C), 107.7 (5-C), 85.7 (8-C), 71.6 (3-C), 68.1 (7-C), 65.7 (OCH<sub>2</sub>Ph), 52.1 (13-C), 42.9 (11-C), 29.2 (2-C), 25.5 (C(CH<sub>3</sub>)<sub>2</sub>), 24.4 (C(CH<sub>3</sub>)<sub>2</sub>) – signals for 1-C and 10-C are not observed in DMSO-d<sub>6</sub> at 343 K due to rotameric effects; two signals were observed for each carbon on a spectrum recorded at 75 MHz in CDCl<sub>3</sub> at 300 K: 148.0 and 147.3 (10-C), 90.0 and 89.3 (1-C). **IR** ν<sub>max</sub>(neat)/cm<sup>-1</sup> 2936, 1710, 1409, 1353, 1214, 1136, 1122, 1069. **HRMS** (ESI): C<sub>20</sub>H<sub>23</sub>NNaO<sub>5</sub> [M+Na]<sup>+</sup>; calculated 380.1468, found 380.1469. **X-Ray crystallography**: CCDC 1526779 contains the supplementary crystallographic data for this compound. Crystals were grown by slow evaporation of EtOH.

S22 Crystal structure:

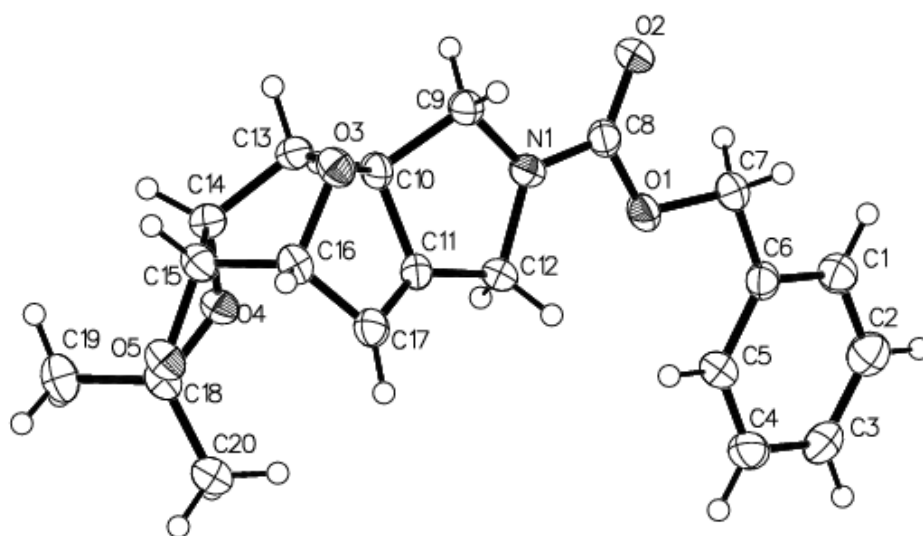

**Benzyl (3aR\*,4R\*,4'S\*,6S\*,7aR\*)-4'-hydroxy-4-(hydroxymethyl)-2,2-dimethyl-tetrahydro-2H-spiro[[1,3]dioxolo[4,5-c]pyran-6,3'-pyrrolidine]-1'-carboxylate 3**

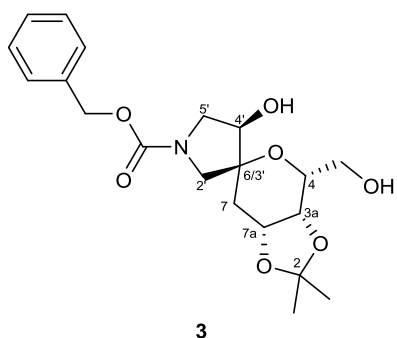

O<sub>3</sub> was bubbled through a solution of acetone **S22** (200 mg, 0.56 mmol, 1.00 eq) in CH<sub>2</sub>Cl<sub>2</sub> (6.0 mL) at -78 °C. After 15 min the solution turned blue in colour and O<sub>3</sub> was exchanged for N<sub>2</sub> for 20 min. Dimethyl sulfide (62.0 μL, 0.840 mmol, 1.5 eq) was then added at -78 °C. After 10 min the reaction mixture was warmed to rt and stirred for 2 h. After establishing no peroxides were present (starch iodine paper) the reaction mixture was concentrated *in vacuo* to furnish a keto-aldehyde that was used immediately with no further purification. NaBH<sub>4</sub> (63.0 mg, 1.68 mmol, 3.0 eq) was added to a solution of the crude keto-aldehyde in MeOH (6.0 mL) at 0 °C. The reaction mixture was warmed to rt with stirring over 4 h before being quenched by the addition of H<sub>2</sub>O (0.10 mL) and concentrating *in vacuo*. The resulting crude product was suspended in 9:1 EtOAc–MeOH with sonication and filtered through celite. The filtrate was concentrated *in vacuo* and purified by flash chromatography, eluting with EtOAc to furnish the *title compound 3* (103 mg, 0.25 mmol, 44%, *dr* 92:8) as a colourless waxy solid. *R*<sub>f</sub> 0.31 (EtOAc). **<sup>1</sup>H NMR** (500 MHz, MeOD-d<sub>4</sub>, 333 K): δ 7.36-7.28 (5H, m, Cbz Ar-H), 5.11 (2H, s, OCH<sub>2</sub>Ph), 4.49-4.45 (1H, m, 7a-H), 4.16 (1H, app. d, *J* 5.9, 3a-H), 4.02 (1H, app. t, *J* 5.9, 4'-H), 3.75-3.69 (3H, m, 4-H and CH<sub>2</sub>OH), 3.65-3.59 (2H, m, 2'-H<sub>A</sub> and 5'-H<sub>A</sub>), 3.38-3.35 (2H, m, 2'-H<sub>B</sub> and 5'-H<sub>B</sub>), 1.94 (1H, dd, *J* 14.7, 6.2, 7-H<sub>A</sub>), 1.86 (1H, dd, *J* 14.7, 4.5, 7-H<sub>B</sub>), 1.47 (3H, s, acetone CH<sub>3</sub>), 1.32 (3H, s, acetone CH<sub>3</sub>). **<sup>13</sup>C NMR** (125 MHz, MeOD-d<sub>4</sub>, 333 K, mixture of two rotamers): δ 156.9 (N(CO)O), 138.2 (Ar-C<sub>q</sub>), 129.5 (Ar-C), 129.0 (Ar-C), 128.8 (Ar-C), 110.2 (2-C), 80.7 (2 peaks, 6/3'-C), 76.9 (4'-C), 76.3 (4'-C), 74.0 (4-C), 73.5 (3a-C), 72.2 (7a-C), 68.2 (OCH<sub>2</sub>Ph), 62.9 (CH<sub>2</sub>OH), 52.9 (5'-C), 51.8 (2'-C), 51.6 (2'-C), 32.4 (7-C), 27.3 (acetone CH<sub>3</sub>), 25.6 (acetone CH<sub>3</sub>) [21 of 36 expected peaks observed]. **IR** ν<sub>max</sub>(neat)/cm<sup>-1</sup> 3423, 2934, 1695, 1420, 1355, 1213, 1090. **HRMS** (ESI): C<sub>20</sub>H<sub>27</sub>NNaO<sub>7</sub> [M+Na]<sup>+</sup>; calculated 416.1679, found 416.1675.

**3 NOESY correlations:**

- 4'-H: 7-H<sub>A</sub> and 7-H<sub>B</sub>
- 7-H<sub>A</sub>: 4'-H
- 7-H<sub>B</sub>: 4'-H

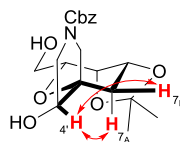

**(3*R*\*,7*S*\*,8*R*\*)-5,5,12-Trimethyl-4,6-dioxa-12-azatricyclo[8.3.0.0<sup>3,7</sup>]tridec-1(10)-en-8-ol 12**

**(≡ F12)**

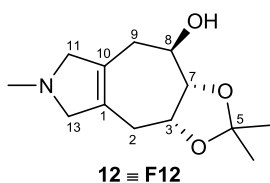

LiAlH<sub>4</sub> (1.0 M solution in THF, 5.60 mL, 5.60 mmol, 10.0 eq) was added drop-wise over 15 min to a solution of acetonide **S22** (200 mg, 0.56 mmol, 1.00 eq) in THF (4.0 mL) at rt. Upon completion of addition the reaction mixture was heated at reflux for 4 days before being cooled rt and quenched by the sequential slow addition of H<sub>2</sub>O (0.2 mL), 2 M aqueous NaOH (0.2 mL) and water (0.6 mL). The resulting suspension was stirred vigorously for 2 h before being diluted with MeOH (20 mL), filtered through celite and concentrated *in vacuo*. The crude product was purified by SCX SPE to furnish the *title compound 12* (≡ **F12**: 100 mg, 0.42 mmol, 75%) as an off-white waxy solid. *R<sub>f</sub>* 0.34 (9:1 CH<sub>2</sub>Cl<sub>2</sub>–sat. NH<sub>3</sub>/MeOH). **<sup>1</sup>H NMR** (500 MHz, CDCl<sub>3</sub>): δ 4.29 (1H, ddd, *J* 11.3, 6.8, 4.3, 3-H), 4.12 (1H, ddd, *J* 11.1, 9.0, 3.5, 8-H), 4.07 (1H, dd, *J* 9.0, 6.8, 7-H), 3.47-3.35 (4H, m, 11-H and 13-H), 2.41 (3H, s, NCH<sub>3</sub>), 2.39-2.31 (2H, m, 2-H<sub>A</sub> and 9-H<sub>B</sub>), 2.20 (1H, dd, *J* 11.1, 3.5, 9-H<sub>A</sub>), 2.13 (1H, dd, *J* 15.4, 4.3, 2-H<sub>B</sub>), 1.47 (3H, s, acetonide CH<sub>3</sub>), 1.35 (3H, s, acetonide CH<sub>3</sub>). **<sup>13</sup>C NMR** (125 MHz, CDCl<sub>3</sub>) 130.9 (1-C or 10-C), 128.4 (1-C or 10-C), 108.3 (5-C), 82.2 (8-C), 74.9 (3-C), 68.3 (7-C), 66.6 (11-C or 13-C), 66.4 (11-C or 13-C), 42.0 (NCH<sub>3</sub>), 33.0 (9-C), 28.6 (2-C), 27.8 (C(CH<sub>3</sub>)<sub>2</sub>), 25.0 (C(CH<sub>3</sub>)<sub>2</sub>). **IR** *v*<sub>max</sub>(neat)/cm<sup>-1</sup> 3340, 2922, 2772, 1450, 1375, 1240, 1211, 1167, 1142, 1114, 1069, 1031. **HRMS** (ESI) C<sub>13</sub>H<sub>22</sub>NO<sub>3</sub> [M+Na]<sup>+</sup>; calculated 240.1594, found 240.1595.

#### 5.4.2.2.2 Preparation of quinoxaline scaffold 10

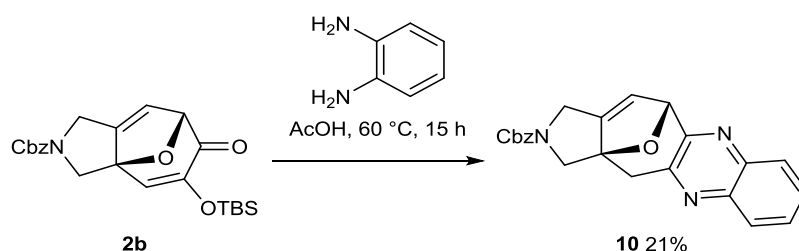

#### Benzyl (1*R*\*,13*R*\*)-19-oxa-4,11,17-triazapentacyclo[11.5.1.0<sup>1,15</sup>.0<sup>3,12</sup>.0<sup>5,10</sup>]nonadeca-3,5(10),6,8,11,14-hexaene-17-carboxylate **10**

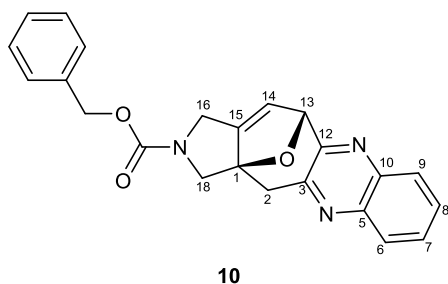

1,2-Diaminobenzene (28 mg, 0.26 mmol, 1.1 eq.) was added to a stirred suspension of cycloadduct **2b** (100 mg, 0.23 mmol, 1.00 eq.) in AcOH (3 mL). The reaction mixture was heated in a sealed tube at 60 °C for 15 h.\* The reaction mixture was concentrated *in vacuo* then partitioned between CH<sub>2</sub>Cl<sub>2</sub> (10 mL) and sat. aq. NaHCO<sub>3</sub> (10 mL). The aqueous phase was extracted with CH<sub>2</sub>Cl<sub>2</sub> (2 × 10 mL). The combined organic phases were dried over MgSO<sub>4</sub>, filtered and concentrated *in vacuo*. Flash chromatography eluting with 4:1 pentane–EtOAc gave the *title compound* **10** (19 mg, 49 μmol, 21%) as a colourless oil. *R<sub>f</sub>* 0.07 (4:1 petrol–EtOAc). **<sup>1</sup>H NMR** (500 MHz, CDCl<sub>3</sub>, 50:50 mixture of rotamers): δ 8.02-7.95 (2H, m, 6-H and 9-H), 7.76-7.65 (2H, m, 7-H and 8-H), 7.45-7.29 (5H, m, Cbz Ar-H), 6.37 (0.5H, app. s, 14-H), 6.33 (0.5H, app. s, 14-H), 5.82 (1H, app. s, 13-H), 5.25-5.14 (2H, m, OCH<sub>2</sub>Ph), 4.25 (1H, app. dd, *J* 16.1, 11.5, 16-H<sub>A</sub>), 4.12 (1H, app. dd, *J* 16.1, 8.6, 16-H<sub>B</sub>), 3.97 (0.5H, d, *J* 11.2, 18-H<sub>A</sub>), 3.90 (0.5H, d, *J* 11.2, 18-H<sub>B</sub>), 3.71 (1H, d, *J* 11.2, 18-H<sub>B</sub>), 3.59 (1H, app. t, *J* 18.1, 2-H<sub>A</sub>), 3.19 (1H, d, *J* 18.1, 2-H<sub>B</sub>). **<sup>13</sup>C NMR** (125 MHz, CDCl<sub>3</sub>, mixture of two rotamers): δ 155.0 (N(CO)O), 154.8 (N(CO)O), 152.9 (Ar-C<sub>q</sub>), 151.4 (Ar-C<sub>q</sub>), 151.3 (Ar-C<sub>q</sub>), 147.4 (Ar-C<sub>q</sub> or 15-C), 146.7 (Ar-C<sub>q</sub> or 15-C), 142.1 (Ar-C<sub>q</sub>), 139.9 (Ar-C<sub>q</sub>), 136.6 (Ar-C<sub>q</sub>), 129.8 (Ar-C), 129.6 (Ar-C), 128.9 (Ar-C), 128.7 (Ar-C), 128.6 (Ar-C), 128.4 (Ar-C), 128.2 (Ar-C), 128.2 (Ar-C), 126.5 (2 peaks, 14-C), 91.7 (1-C), 90.9 (1-C), 89.1 (13-C), 67.5 (OCH<sub>2</sub>Ph), 53.5 (18-C), 43.6 (16-C), 43.4 (16-C), 37.6 (2-C), 37.5 (2-C) [28 of 42 expected peaks observed]. **IR** *v*<sub>max</sub>(film)/cm<sup>-1</sup> 2928, 1704, 1415, 1358, 1343, 1126, 1100, 764. **HRMS** (ESI): C<sub>23</sub>H<sub>20</sub>N<sub>3</sub>O<sub>3</sub> [M+H]<sup>+</sup>; calculated 386.1499, found 386.1499.

\* N.b. under μW irradiation this reaction mainly gave decomposition products at 180 °C (as judged by analysis of the crude reaction product by <sup>1</sup>H NMR spectroscopy at 300 MHz).

### 5.4.2.2.3 Preparation of imidazole scaffold 11

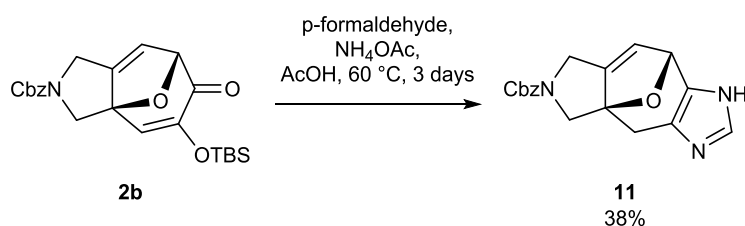

### Benzyl (1*R*\*,8*R*\*)-14-oxa-4,6,12-triazatetracyclo[6.5.1.0<sup>1,10</sup>.0<sup>3,7</sup>]tetradeca-3(7),4,9-triene-12-carboxylate **11**

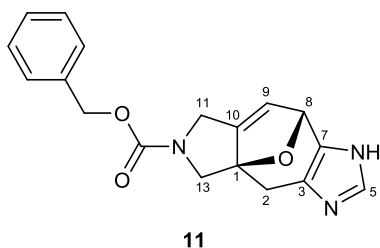

p-Formaldehyde (15 mg, 0.50 mmol, 2.0 eq.) and NH<sub>4</sub>OAc (177 mg, 2.29 mmol, 10.0 eq.) were added to a suspension of cycloadduct **2b** (100 mg, 0.23 mmol, 1.0 eq.) in AcOH (3.0 mL). The reaction mixture was heated in a sealed tube at 60 °C for 3 days.\* The reaction mixture was concentrated *in vacuo*, then partitioned between EtOAc (10 mL) and NaHCO<sub>3</sub> (10 mL). The phases were separated and the aqueous phase was extracted with EtOAc (2 × 10 mL). The combined organic extracts were dried over MgSO<sub>4</sub>, filtered and concentrated *in vacuo*. Flash chromatography eluting with 90:9:1 CH<sub>2</sub>Cl<sub>2</sub>–EtOH–NH<sub>3</sub>/MeOH gave the *title compound* **11** (28 mg, 87 μmol, 38%) as a colourless foam. *R<sub>f</sub>* 0.15 (90:9:1 CH<sub>2</sub>Cl<sub>2</sub>–EtOH–NH<sub>3</sub>/MeOH). **<sup>1</sup>H NMR** (500 MHz, CDCl<sub>3</sub>, imidazole NH not observed): δ 7.43-7.29 (6H, m, 5-H and Cbz Ar-H), 6.45 (0.5H, app. s, 9-H), 6.43 (0.5H, app. s, 9-H), 5.65 (1H, app. s, 8-H), 5.21-5.11 (2H, m, OCH<sub>2</sub>Ph), 4.16 (1H, app. dd, *J* 15.8, 6.1, 11-H<sub>A</sub>), 4.08 (1H, app. ddd, *J* 15.8, 4.2, 2.2, 11-H<sub>B</sub>), 3.87 (0.5H, d, *J* 11.2, 13-H<sub>A</sub>), 3.79 (0.5H, d, *J* 11.2, 13-H<sub>A</sub>), 3.62 (1H, app. dd, *J* 11.2, 3.1, 13-H<sub>B</sub>), 3.19 (1H, app. t, *J* 16.2, 2-H<sub>A</sub>), 2.75 (1H, d, *J* 16.2, 2-H<sub>B</sub>). **<sup>13</sup>C NMR** (125 MHz, CDCl<sub>3</sub>, mixture of two rotamers, 2 × imidazole C<sub>q</sub> not observed): δ 155.1 (N(CO)O), 154.9 (N(CO)O), 146.0 (10-C), 136.7 (Ar-C<sub>q</sub>), 132.1 (Ar-C), 131.4 (Ar-C), 128.7 (Ar-C), 128.3 (Ar-C), 128.2 (Ar-C), 91.2 (1-C), 90.4 (1-C), 84.8 (9-C), 77.3 (8-C), 67.4 (OCH<sub>2</sub>Ph), 53.9 (13-C), 43.5 (11-C), 43.4 (11-C), 30.2 (2-C), 30.1 (2-C) [19 of 32 expected peaks observed]. **IR** *v*<sub>max</sub>(film)/cm<sup>-1</sup> 2957, 1701 (CO), 1417, 1358, 1216, 1115, 733. **HRMS** (ESI): C<sub>18</sub>H<sub>18</sub>N<sub>3</sub>O<sub>3</sub> [M+H]<sup>+</sup>; calculated 324.1343, found 324.1342.

\* N.b. under **μW irradiation** this reaction mainly gave decomposition products at 180 °C (as judged by analysis of the crude reaction product by <sup>1</sup>H NMR spectroscopy at 300 MHz).



### 5.4.2.3 Scaffolds derived from cycloadduct 2c

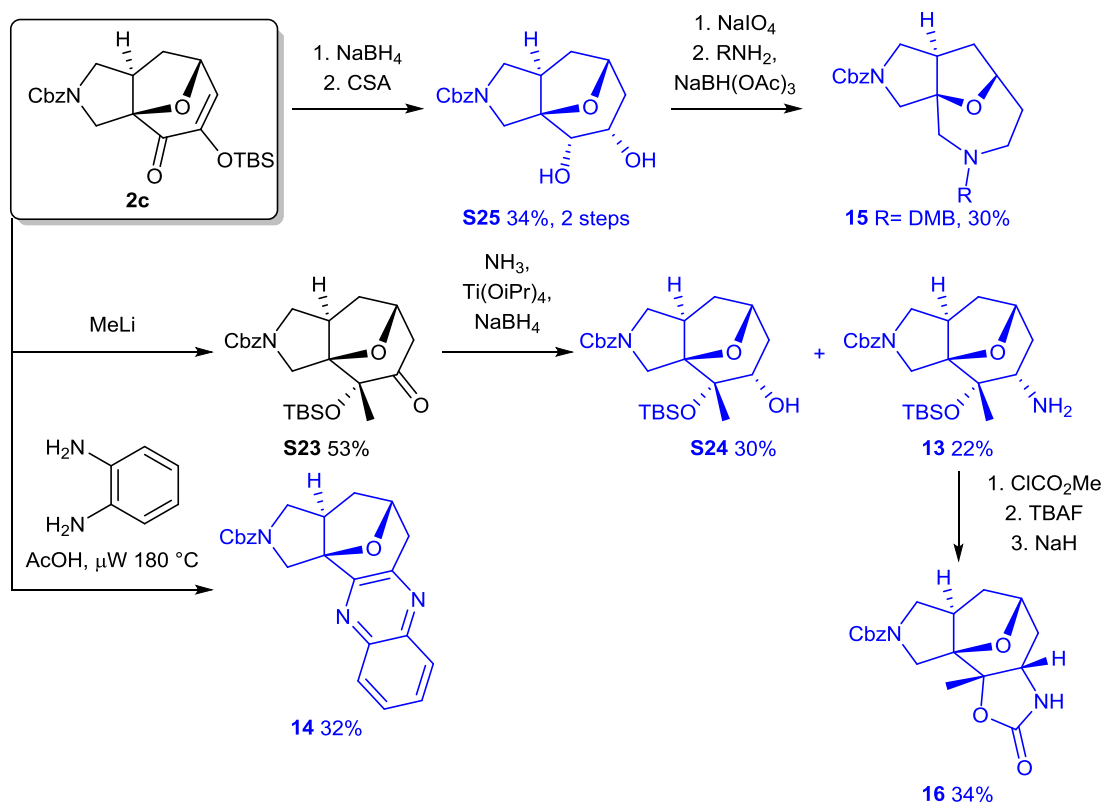

### 5.4.2.3.1 Preparation of silyl-protected amino alcohol scaffold 13 and alcohol S24

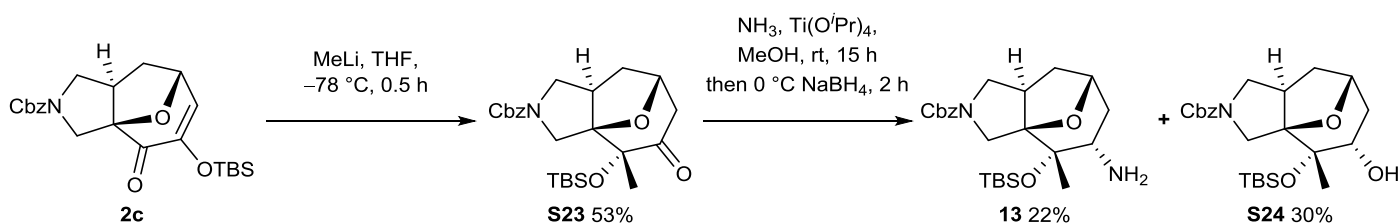

### Benzyl (1*R*\*,5*R*\*,7*R*\*,10*R*\*)-10-[(*tert*-butyldimethylsilyl)oxy]-10-methyl-9-oxo-11-oxa-3-azatricyclo[5.3.1.0<sup>1,5</sup>]undecane-3-carboxylate S23

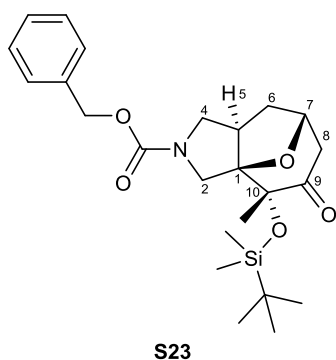

MeLi (1.6 M in Et<sub>2</sub>O, 5.9 mL, 9.5 mmol, 1.2 eq.) was added to a stirred solution of cycloadduct **2c** (3.4 g, 7.9 mmol, 1.0 eq.) in THF (125 mL) at -78 °C. The reaction mixture was stirred at this temperature for 1 h, then warmed to rt. H<sub>2</sub>O (5 mL) was added then the reaction mixture was concentrated *in vacuo*. The residue was diluted in EtOAc (50 mL) and washed with brine (50 mL). The aqueous phase was extracted with EtOAc (2 × 25 mL). The combined organic extracts were dried, filtered and concentrated *in vacuo*. Flash chromatography eluting with 4:1 pentane–EtOAc gave the *title compound* **S23** (1.86 g, 4.20 mmol, 53%) as a colourless oil. *R*<sub>f</sub> 0.10 (4:1 petrol–EtOAc).

**<sup>1</sup>H NMR** (500 MHz, CHCl<sub>3</sub>, 50:50 mixture of rotamers): δ 7.39-7.27 (5H, m, Cbz Ar-H), 5.13 (2H, s, OCH<sub>2</sub>Ph), 4.79-4.72 (1H, m, 7-H), 3.95-3.65 (3H, m, 2-H and 4-H<sub>A</sub>), 3.27-3.18 (1H, m, 5-H), 2.90-2.72 (2H, m, 4-H<sub>B</sub> and 8-H<sub>B</sub>), 2.29 (1H, d, *J* 15.0, 8-H<sub>A</sub>), 2.01-1.87 (2H, m, 6-H), 1.44 (1.5H, s, C<sub>q</sub>CH<sub>3</sub>), 1.40 (1.5H, s, C<sub>q</sub>CH<sub>3</sub>), 0.85 (4.5H, s, SiC<sub>q</sub>(CH<sub>3</sub>)<sub>3</sub>), 0.83 (4.5H, s, SiC<sub>q</sub>(CH<sub>3</sub>)<sub>3</sub>), 0.17 (3H, s, (SiCH<sub>3</sub>)<sub>A</sub>), 0.16 (1.5H, s, (SiCH<sub>3</sub>)<sub>B</sub>), 0.15 (1.5H, s, (SiCH<sub>3</sub>)<sub>B</sub>). **<sup>13</sup>C NMR** (125 MHz, CHCl<sub>3</sub>, mixture of two rotamers, 1-C not observed): δ 207.8 (9-C), 154.6 (N(CO)O), 137.0 (Ar-C<sub>q</sub>), 128.6 (Ar-C), 128.1 (Ar-C), 127.1 (Ar-C), 81.7 (10-C), 77.1 (7-C), 67.1 (OCH<sub>2</sub>Ph), 54.5 (2-C or 4-C), 54.2 (2-C or 4-C), 50.5 (2-C or 4-C), 50.1 (2-C or 4-C), 47.2 (8-C), 40.9 (5-C), 37.9 (6-C), 37.7 (6-C), 26.0 (SiC<sub>q</sub>(CH<sub>3</sub>)<sub>3</sub>), 22.2 (C<sub>q</sub>CH<sub>3</sub>), 18.7 (SiC<sub>q</sub>), -2.6 (SiCH<sub>3</sub>) [21 of 38 expected peaks observed]. **IR** *v*<sub>max</sub>(film)/cm<sup>-1</sup> 2953, 2930, 2883, 2855, 1707 (CO), 1418, 1359, 1345. **HRMS** (ESI): C<sub>24</sub>H<sub>36</sub>NO<sub>5</sub>Si [M+H]<sup>+</sup>; calculated 446.2357, found 446.2360.

**Benzyl (1*R*\*,5*R*\*,7*R*\*,9*S*\*,10*S*\*)-9-amino-10-[(*tert*-butyldimethylsilyl)oxy]-10-methyl-11-oxa-3-azatricyclo[5.3.1.0<sup>1,5</sup>]undecane-3-carboxylate **13** and benzyl (1*R*\*,5*R*\*,7*R*\*,9*S*\*,10*S*\*)-10-[(*tert*-butyldimethylsilyl)oxy]-9-hydroxy-10-methyl-11-oxa-3-azatricyclo[5.3.1.0<sup>1,5</sup>]undecane-3-carboxylate **S24****

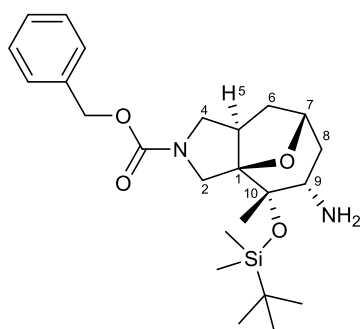

**13**  
+

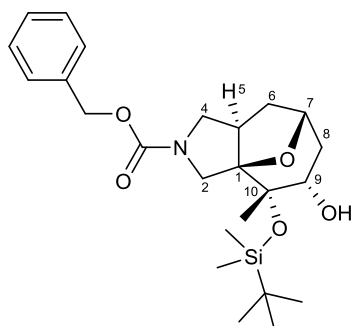

**S24**

Ti(O<sup>*i*</sup>Pr)<sub>4</sub> (2.4 mL, 8.1 mmol, 2.0 eq.) was added to a stirred solution of ketone **S23** (1.8 g, 4.1 mmol, 1.0 eq.) in sat. NH<sub>3</sub>/MeOH (50 mL). The reaction mixture was stirred for 15 h then NaBH<sub>4</sub> (230 mg, 6.09 mmol, 1.5 eq.) was added at 0 °C. The reaction mixture was warmed to rt, stirred for 2 h then concentrated *in vacuo*.<sup>\*</sup> The residue was diluted in EtOAc (50 mL) and sat. aq. brine (50 mL) was added and the mixture was stirred vigorously. The phases were separated and the aqueous phase was extracted with EtOAc (2 × 25 mL). The combined organic phase was washed with H<sub>2</sub>O (25 mL), then dried over MgSO<sub>4</sub>, filtered, and concentrated *in vacuo*. Flash chromatography eluting with 98:2:0.1 CH<sub>2</sub>Cl<sub>2</sub>–EtOH–NH<sub>3</sub>/MeOH gave the *title compounds* **13** (416 mg, 0.93 mmol, 22%) and **S24** (542 mg, 1.21 mmol, 30%) as colourless oils. **Benzyl (1*R*\*,5*R*\*,7*R*\*,9*S*\*,10*S*\*)-9-amino-10-[(*tert*-butyldimethylsilyl)oxy]-10-methyl-11-oxa-3-azatricyclo[5.3.1.0<sup>1,5</sup>]undecane-3-carboxylate **13**** *R*<sub>f</sub> 0.10 (98:2:0.1 CH<sub>2</sub>Cl<sub>2</sub>–EtOH–NH<sub>3</sub>/MeOH).

**<sup>1</sup>H NMR** (500 MHz, CHCl<sub>3</sub>, 50:50 mixture of rotamers, NH<sub>2</sub> not observed) δ 7.38–7.28 (5H, m, Cbz Ar-H), 5.18–5.05 (2H, m, OCH<sub>2</sub>Ph), 4.50–4.44 (1H, m, 7-H), 3.93 (0.5H, app. t, *J* 10.2, 4-H<sub>A</sub>), 3.86 (0.5H, app. t, *J* 10.2, 4-H<sub>A</sub>), 3.74 (1H, app. t, *J* 12.5, 2-H<sub>A</sub>), 3.59–3.44 (2H, m, includes: 1H, 9-H; and at δ 3.56: 0.5H, d, *J* 11.9, 2-H<sub>B</sub>; and at δ 3.48: 0.5H, d, *J* 11.9, 2-H<sub>B</sub>), 3.20 (1H, dd, *J* 10.2, 7.9, 4-H<sub>B</sub>), 3.16 (1H, app. t, *J* 5.6, 5-H), 2.58 (1H, dd, *J* 11.9, 8.9, 8-H<sub>B</sub>), 2.14–2.05 (1H, m, 6-H<sub>A</sub>), 1.85–1.73 (1H, m, 8-H<sub>A</sub>), 1.59–1.42 (1H, m, 6-H<sub>B</sub>), 1.38 (1.5H, s, C<sub>q</sub>CH<sub>3</sub>), 1.34 (1.5H, s, C<sub>q</sub>CH<sub>3</sub>), 0.90 (4.5H, s, SiC<sub>q</sub>(CH<sub>3</sub>)<sub>3</sub>), 0.88 (4.5H, s, SiC<sub>q</sub>(CH<sub>3</sub>)<sub>3</sub>), 0.19 (1.5H, s, SiCH<sub>3</sub>), 0.16 (1.5H, s, SiCH<sub>3</sub>), 0.15 (1.5H, s, SiCH<sub>3</sub>), 0.13 (1.5H, s, SiCH<sub>3</sub>). **<sup>13</sup>C NMR** (100 MHz, CHCl<sub>3</sub>, mixture of two rotamers): δ 154.6 (N(CO)O), 137.3 (Ar-C<sub>q</sub>), 128.6 (Ar-C), 128.0 (2 peaks, Ar-C), 127.9 (Ar-C), 95.4 (1-C), 94.4 (1-C), 78.1 (7-C), 77.9 (7-C), 74.8 (10-C), 74.7 (10-C), 66.8 (OCH<sub>2</sub>Ph), 55.7 (9-C), 55.1 (4-C), 54.8 (4-C), 51.6 (2-C), 51.1 (2-C), 41.2 (5-C), 40.4 (5-C), 38.6 (8-C), 38.4 (8-C), 36.8 (6-C), 26.0 (2 peaks, SiC<sub>q</sub>(CH<sub>3</sub>)<sub>3</sub>), 25.0 (C<sub>q</sub>CH<sub>3</sub>), 18.6 (SiC<sub>q</sub>), –1.6 (SiCH<sub>3</sub>), –2.3 (SiCH<sub>3</sub>) [29 of 38 expected

<sup>\*</sup> Analysis of the crude reaction product using <sup>1</sup>H NMR at 300 MHz suggested that a 1:1 mixture of **13**:**S24** was formed.

peaks observed]. IR  $\nu_{\max}(\text{film})/\text{cm}^{-1}$  2951, 2931, 2883, 2856, 1704 (CO), 1419, 1160, 937, 773.

HRMS (ESI):  $\text{C}_{24}\text{H}_{39}\text{N}_2\text{O}_4\text{Si}$   $[\text{M}+\text{H}]^+$ ; calculated 447.2674, found 447.2680.

**Benzyl (1R\*,5R\*,7R\*,9S\*,10S\*)-10-[(tert-butyl dimethylsilyl)oxy]-9-hydroxy-10-methyl-11-oxa-3-azatricyclo[5.3.1.0<sup>1,5</sup>]undecane-3-carboxylate S24**  $R_f$  0.28 (98:2:0.1  $\text{CH}_2\text{Cl}_2$ -EtOH- $\text{NH}_3/\text{MeOH}$ ).  $^1\text{H NMR}$  (500 MHz,  $\text{CHCl}_3$ , 50:50 mixture of rotamers, OH not observed):  $\delta$  7.39-7.27 (5H, m, Cbz Ar-H), 5.12 (2H, s,  $\text{OCH}_2\text{Ph}$ ), 4.52-4.44 (1H, m, 7-H), 3.99-3.89 (1H, m, 4- $\text{H}_A$ ), 3.87 (0.5H, d,  $J$  12.1, 2- $\text{H}_A$ ), 3.82 (0.5H, d,  $J$  12.1, 2- $\text{H}_A$ ), 3.69 (1H, d,  $J$  4.3, 9-H), 3.60 (0.5H, d,  $J$  12.1, 2- $\text{H}_B$ ), 3.54 (0.5H, d,  $J$  12.1, 2- $\text{H}_B$ ), 3.25-3.05 (2H, m, 4- $\text{H}_B$  and 5-H), 2.44-2.35 (1H, m, 8- $\text{H}_B$ ), 2.19-2.10 (1H, m, 6- $\text{H}_A$ ), 1.86-1.74 (1H, m, 6- $\text{H}_B$ ), 1.68 (1H, d,  $J$  14.3, 8- $\text{H}_A$ ), 1.29 (1.5H, s,  $\text{C}_q\text{CH}_3$ ), 1.26 (1.5H, s,  $\text{C}_q\text{CH}_3$ ), 0.94 (4.5H, s,  $\text{SiC}_q(\text{CH}_3)_3$ ), 0.94 (4.5H, s,  $\text{SiC}_q(\text{CH}_3)_3$ ), 0.12 (6H, s, 2 x  $\text{SiCH}_3$ ).  $^{13}\text{C NMR}$  (125 MHz,  $\text{CHCl}_3$ , mixture of two rotamers,  $\text{N}(\text{CO})\text{O}$  not observed): 137.2 (Ar- $\text{C}_q$ ), 128.6 (Ar-C), 128.1 (Ar-C), 128.0 (Ar-C), 95.4 (1-C), 76.8 (2 peaks, 7-C), 74.5 (9-C), 70.0 (10-C), 69.9 (10-C), 67.0 ( $\text{OCH}_2\text{Ph}$ ), 66.9 ( $\text{OCH}_2\text{Ph}$ ), 55.2 (4-C), 54.9 (4-C), 51.2 (2-C), 50.7 (2-C), 40.7 (5-C), 39.8 (5-C), 37.3 (8-C), 37.0 (6-C), 25.9 ( $\text{SiC}_q(\text{CH}_3)_3$ ), 22.4 ( $\text{C}_q\text{CH}_3$ ), 18.1 ( $\text{SiC}_q$ ), -4.3 ( $\text{SiCH}_3$ ), -5.3 ( $\text{SiCH}_3$ ) [25 of 38 expected peaks observed]. IR  $\nu_{\max}(\text{film})/\text{cm}^{-1}$  2951, 2930, 2885, 2856, 1703 (CO), 1419, 1085, 1072. HRMS (ESI):  $\text{C}_{24}\text{H}_{38}\text{NO}_5\text{Si}$   $[\text{M}+\text{H}]^+$ ; calculated 448.2514, found 448.2518.

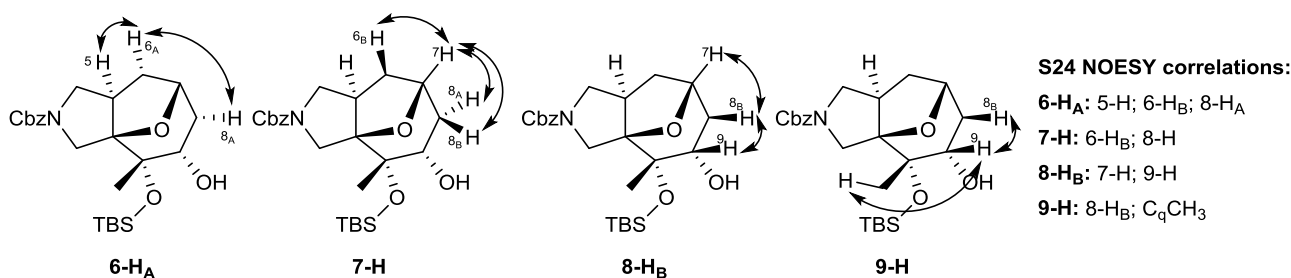

### 5.4.2.3.2 Preparation of quinoxaline scaffold 14

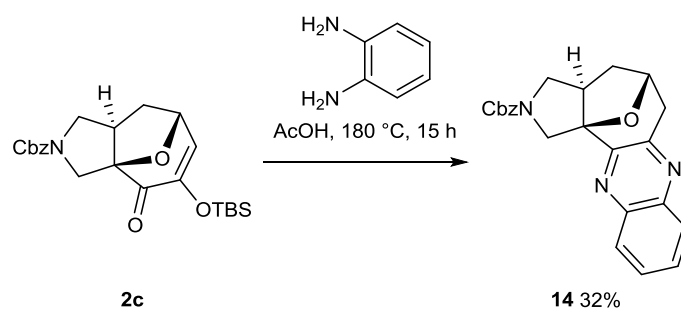

### Benzyl (1*R*\*,13*R*\*,15*R*\*)-19-oxa-3,10,17-triazapentacyclo[11.5.1.0<sup>1,15</sup>.0<sup>2,11</sup>.0<sup>4,9</sup>]nonadeca-2(11),3,5,7,9-pentaene-17-carboxylate **14**

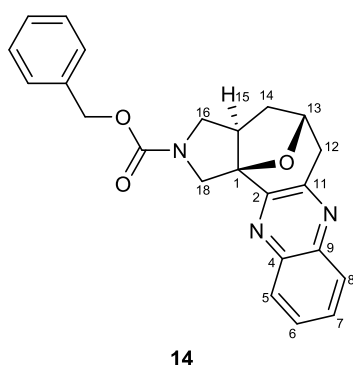

1,2-Diaminobenzene (270 mg, 2.50 mmol, 1.10 eq.) was added to a stirred suspension of cycloadduct **2c** (1.0 g, 2.3 mmol, 1.0 eq.) in AcOH (10 mL). The reaction mixture was heated under microwave irradiation at 180 °C for 10 min. The reaction mixture was concentrated *in vacuo* then partitioned between CH<sub>2</sub>Cl<sub>2</sub> (25 mL) and sat. aq. NaHCO<sub>3</sub> (25 mL). The aqueous phase was extracted with CH<sub>2</sub>Cl<sub>2</sub> (2 × 10 mL). The combined organic phases were dried, filtered and concentrated *in vacuo*. Flash chromatography eluting with 1:1 pentane–EtOAc in pentane gave the *title compound* **14** (281 mg, 0.73 mmol, 32%) as an amorphous orange solid. *R<sub>f</sub>* 0.61 (4:1 petrol–EtOAc). **<sup>1</sup>H NMR** (500 MHz, CDCl<sub>3</sub>, 50:50 mixture of rotamers): δ 8.04–7.94 (2H, m, 5-H and 8-H), 7.77–7.64 (2H, m, 6-H and 7-H), 7.48–7.30 (5H, m, Cbz Ar-H), 5.23–5.15 (2H, m, OCH<sub>2</sub>Ph), 5.12 (1H, app. t, *J* 6.6, 13-H), 5.04 (0.5H, d, *J* 12.8, 18-H<sub>B</sub>), 4.96 (0.5H, d, *J* 12.8, 18-H<sub>B</sub>), 4.14–4.02 (1H, m, 18-H<sub>A</sub>), 3.99 (1H, dd, *J* 12.7, 7.8, 16-H<sub>B</sub>), 3.70 (1H, dd, *J* 18.0, 5.3, 12-H<sub>B</sub>), 3.40–3.26 (1H, m, 16-H<sub>A</sub>), 3.04–2.91 (2H, m, 12-H<sub>A</sub> and 15-H), 2.37–2.21 (1H, m, 14-H<sub>B</sub>), 2.12–2.00 (1H, m, 14-H<sub>A</sub>). **<sup>13</sup>C NMR** (125 MHz, CDCl<sub>3</sub>, mixture of two rotamers): 154.8 (N(CO)O), 152.2 (Ar-C<sub>q</sub>), 150.6 (Ar-C<sub>q</sub>), 142.3 (Ar-C<sub>q</sub>), 140.5 (Ar-C<sub>q</sub>), 137.0 (Ar-C<sub>q</sub>), 130.1 (Ar-C), 129.7 (Ar-C), 129.4 (Ar-C), 129.3 (Ar-C), 128.6 (Ar-C), 128.5 (Ar-C), 128.1 (Ar-C), 92.9 (1-C), 92.2 (1-C), 76.5 (13-C), 67.1 (OCH<sub>2</sub>Ph), 54.1 (16-C), 53.7 (16-C), 51.8 (15-C), 50.9 (15-C), 50.8 (18-C), 50.3 (18-C), 40.6 (12-C), 36.3 (14-C), 36.1 (14-C) [26 of 42 expected peaks observed]. **IR** *v*<sub>max</sub>(film)/cm<sup>-1</sup> 2954, 2888, 1701 (CO), 1447, 1359, 1348, 1319, 1116. **HRMS** (ESI): C<sub>23</sub>H<sub>21</sub>N<sub>3</sub>O<sub>3</sub> [M+H]<sup>+</sup>; calculated 388.1656, found 388.1653.

### 5.4.2.3.3 Preparation of diol **S25** and cyclic amine **15**

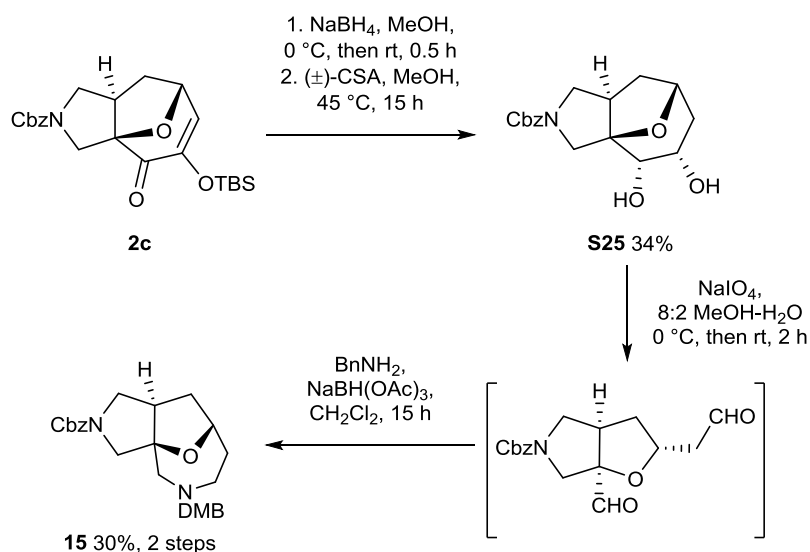

### Benzyl (1*R*\*,5*R*\*,7*R*\*,9*S*\*,10*S*\*)-9,10-dihydroxy-11-oxa-3-azatricyclo[5.3.1.0<sup>1,5</sup>]undecane-3-carboxylate **S25**

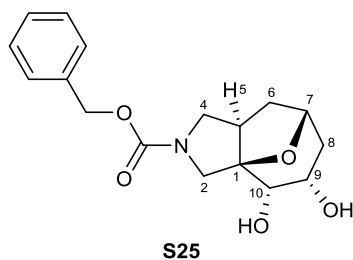

NaBH<sub>4</sub> (1.40 g, 35.8 mmol, 2.20 eq.) was added to a stirred solution of cycloadduct **2c** (7.0 g, 16.3 mmol, 1.0 eq.) in MeOH (100 mL) at 0 °C. The reaction mixture was stirred at 0 °C for 5 min, warmed to rt, stirred for 1 h, then concentrated *in vacuo*. The residue was diluted in CH<sub>2</sub>Cl<sub>2</sub> (100 mL) and washed with 1N HCl (100 mL). The aqueous phase was extracted with CH<sub>2</sub>Cl<sub>2</sub> (50 mL). The organic extracts were combined, washed with brine (50 mL), dried over Na<sub>2</sub>SO<sub>4</sub> and concentrated *in vacuo*. The residue (16.3 mmol) was dissolved in MeOH (100 mL) and (±)-camphorsulfonic acid (4.90 g, 21.2 mmol, 1.30 eq.) was added. The reaction mixture was heated at 45 °C for 15 h, then concentrated *in vacuo*. The residue was diluted in CH<sub>2</sub>Cl<sub>2</sub> (50 mL). Saturated aqueous NaHCO<sub>3</sub> (50 mL) and H<sub>2</sub>O (50 mL) were added and the phases were separated. The aqueous phase was extracted using CH<sub>2</sub>Cl<sub>2</sub> (2 × 50 mL). The organic extracts were combined, dried over Na<sub>2</sub>SO<sub>4</sub> and concentrated *in vacuo*. Flash chromatography eluting with 100% EtOAc gave the *title compound* **S25** (1.75 g, 5.48 mmol, 34%, 2 steps) as a pale brown oil. *R*<sub>f</sub> 0.08 (2:3 pentane–EtOAc). <sup>1</sup>H NMR (500 MHz, CDCl<sub>3</sub>, 50:50 mixture of rotamers, 2 × OH not observed): δ 7.38–7.27 (5H, m, Cbz Ar-H), 5.10 (1H, 2 × s, OCH<sub>2</sub>Ph), 4.48 (1H, dd, *J* 7.1, 4.5, 7-H), 4.17–4.08 (1H, m, 9-H), 3.97–3.82 (2H, m, includes: 1H, 2-H<sub>A</sub>; and at δ 3.90: 0.5H, dd, *J* 12.2, 4-H<sub>A</sub> and at δ 3.85: 0.5H, dd, *J* 12.2, 4-H<sub>A</sub>), 3.79 (0.5H, d, *J* 4.6, 10-H), 3.75 (0.5H, d, *J* 4.6, 10-H), 3.56 (1H, dd, *J* 12.2, 5.9, 4-H<sub>B</sub>), 3.23–3.11 (2H, m, 2-H<sub>B</sub> and 5-H), 2.52–2.44 (1H, m, 6-H<sub>A</sub>), 2.10–2.00 (1H, m, 8-H<sub>B</sub>), 1.96–1.75 (2H, m, includes: 1H, 6-H<sub>B</sub>; and at

$\delta$  1.87: 1H, app. d,  $J$  14.3, 8-H<sub>A</sub>). <sup>13</sup>C NMR (125 MHz, CDCl<sub>3</sub>, mixture of two rotamers):  $\delta$  154.9 (N(CO)O), 154.7 (N(CO)O), 137.0 (Ar-C<sub>q</sub>), 136.8 (Ar-C<sub>q</sub>), 128.6 (Ar-C), 128.1 (Ar-C), 128.1 (Ar-C), 128.1 (Ar-C), 128.0 (2 peaks, Ar-C), 92.5 (1-C), 91.5 (1-C), 76.7 (7-C), 76.5 (7-C), 68.2 (10-C), 67.8 (10-C), 67.4 (9-C), 67.3 (9-C), 67.1 (OCH<sub>2</sub>Ph), 67.0 (OCH<sub>2</sub>Ph), 55.2 (2-C), 54.8 (2-C), 52.1 (4-C), 51.5 (4-C), 40.8 (5-C), 39.8 (5-C), 38.1 (8-C), 37.6 (8-C), 37.0 (6-C), 36.7 (6-C) [30 of 30 expected peaks observed]. IR  $\nu_{\max}$ (film)/cm<sup>-1</sup> 3414 (br., OH), 2948, 2885, 1675, 1424, 1349, 1114, 1076. HRMS (ESI): C<sub>17</sub>H<sub>22</sub>NO<sub>5</sub> [M+H]<sup>+</sup>; calculated 320.1492, found 320.1494.

**S25 NOESY correlations:**

**5-H:** 6<sub>A</sub>

**6-H<sub>A</sub>:** 5-H; 8-H<sub>A</sub>

**7-H:** 6-H<sub>B</sub>; 8-H<sub>A</sub>; 8-H<sub>B</sub>

**8-H<sub>B</sub>:** 7-H; 9-H

**9-H:** 10-H

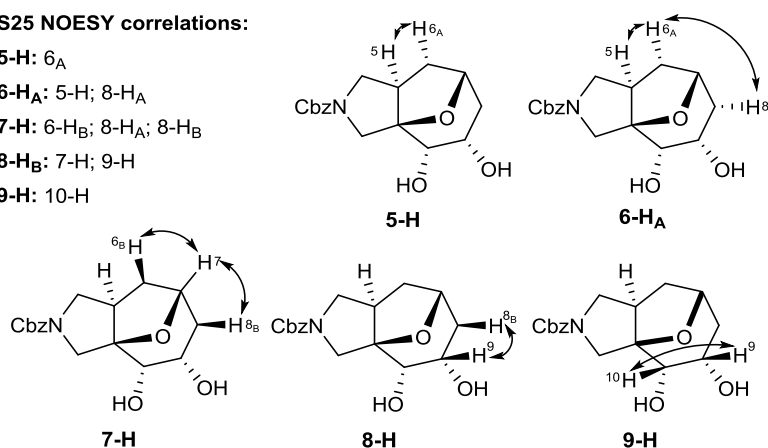

**(1S\*,5R\*,7R\*)-10-[(2,4-dimethoxyphenyl)methyl]-12-oxa-3,10-diazatricyclo[5.4.1.0<sup>1,5</sup>]dodecane-3-carboxylate **15****

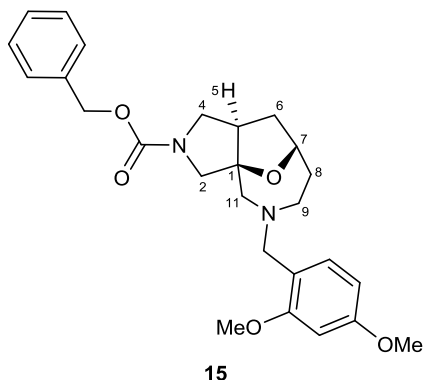

NaIO<sub>4</sub> (2.14 g, 10.0 mmol, 2.00 eq.) was added to a stirred solution of diol **S25** (1.6 g, 5.0 mmol, 1.0 eq.) in 2:1 MeOH–H<sub>2</sub>O (45 mL) at 0 °C. The reaction mixture was warmed to rt and stirred for 15 h. The reaction mixture was concentrated *in vacuo*, then diluted in CH<sub>2</sub>Cl<sub>2</sub> (50 mL) and washed with brine (50 mL). The phases were separated and the aqueous layer was extracted with CH<sub>2</sub>Cl<sub>2</sub> (3 × 25 mL). The resulting crude dialdehyde was dissolved in CH<sub>2</sub>Cl<sub>2</sub> (50 mL), and (2,4-dimethoxyphenyl)methanamine (1.0 mL, 6.3 mmol, 1.3 eq.) and NaBH(OAc)<sub>3</sub> (2.76 g, 13.0 mmol, 2.60 eq.) were added. The reaction mixture was stirred for 15 h then filtered through Celite and concentrated *in vacuo*. The resulting residue was diluted in EtOAc (50 mL) and washed with brine (50 mL). The aqueous phase was extracted with EtOAc (2 × 25 mL). The combined organic phase was dried over MgSO<sub>4</sub>, filtered and concentrated *in vacuo*. Flash chromatography eluting with 98:2:0.1 CH<sub>2</sub>Cl<sub>2</sub>–EtOH–NH<sub>3</sub>/MeOH gave the *title compound* **15** (685 mg, 1.51 mmol, 30%, 2 steps) as a colourless oil.  $R_f$  0.51 (29:1:0.1 CH<sub>2</sub>Cl<sub>2</sub>–EtOH–NH<sub>3</sub>/MeOH). <sup>1</sup>H NMR (500 MHz, CDCl<sub>3</sub>):  $\delta$  7.38–7.27 (6H, m, Cbz Ar-H and DMB 6-H), 6.47 (1H, dd,  $J$  8.3, 2.2, DMB 5-H), 6.44 (1H, d,  $J$  2.2, DMB 3-H), 5.09 (2H, s, OCH<sub>2</sub>Ph),

4.62 (1H, td, *J* 8.3, 3.5, 7-H), 3.81 (3H, s, OCH<sub>3</sub>), 3.79-3.74 (4H, m, includes: 1H, 4-H<sub>A</sub>; and at  $\delta$  3.78: 3H, s, OCH<sub>3</sub>), 3.65 (1H, d, *J* 12.2, 2-H<sub>A</sub>), 3.56 (1H, d, *J* 13.9, NCH<sub>A</sub>H<sub>B</sub>Ar), 3.53 (1H, d, *J* 13.9, NCH<sub>A</sub>H<sub>B</sub>Ar), 3.33-3.11 (2H, m, 2-H<sub>B</sub> and 4-H<sub>B</sub>), 2.77 (1H, dd, *J* 13.3, 6.8, 9-H<sub>A</sub>), 2.69 (1H, d, *J* 12.2, 11-H<sub>A</sub>), 2.66-2.46 (3H, m, 5-H, 9-H<sub>B</sub> and 11-H<sub>B</sub>), 2.34-2.23 (1H, m, 6-H<sub>A</sub>), 2.14-2.01 (1H, m, 6-H<sub>B</sub>), 1.98-1.89 (1H, m, 8-H<sub>A</sub>), 1.63-1.52 (1H, m, 8-H<sub>B</sub>). <sup>13</sup>C NMR (125 MHz, CDCl<sub>3</sub>, 329 K, mixture of two rotamers, DMB 1-C not observed):  $\delta$  159.9 (DMB 2-C or 4-C), 158.8 (DMB 2-C or 4-C), 154.7 (N(CO)O), 137.1 (Ar-C<sub>q</sub>), 130.4 (Ar-C), 128.6 (Ar-C), 128.0 (Ar-C), 120.4 (DMB 6-C), 104.2 (DMB 5-C), 98.5 (DMB 3-C), 94.0 (1-C), 77.7 (7-C), 66.9 (OCH<sub>2</sub>Ph), 66.1 (OCH<sub>2</sub>Ph), 64.4 (11-C), 64.2 (11-C), 57.1 (NCH<sub>2</sub>Ar), 55.5 (2 peaks, 2  $\times$  OCH<sub>3</sub>), 55.3 (2-C), 54.9 (2-C), 53.6 (4-C), 53.2 (4-C), 53.0 (9-C), 46.3 (5-C), 45.3 (5-C), 40.9 (6-C), 40.5 (6-C), 36.8 (8-C) [29 of 48 expected peaks observed]. IR  $\nu_{\text{max}}$ (film)/cm<sup>-1</sup> 2935, 1704 (CO), 1612, 1587, 1505, 1455, 1208. HRMS (ESI): C<sub>26</sub>H<sub>33</sub>N<sub>2</sub>O<sub>5</sub> [M+H]<sup>+</sup>; calculated 453.2384, found 453.2392.

#### 5.4.2.3.4 Preparation of oxazolidinone scaffold 16

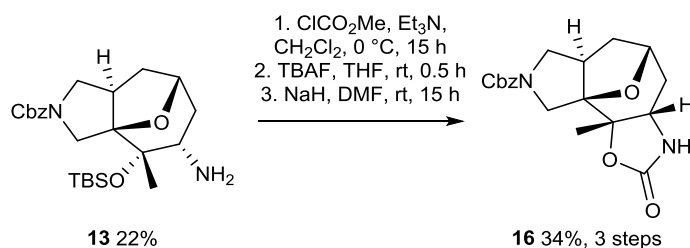

#### Benzyl (1*R*\*,2*S*\*,6*S*\*,8*R*\*,10*R*\*)-2-methyl-4-oxo-3,14-dioxo-5,12-diazatetracyclo[6.5.1.0<sup>1,10</sup>.0<sup>2,6</sup>]tetradecane-12-carboxylate 16

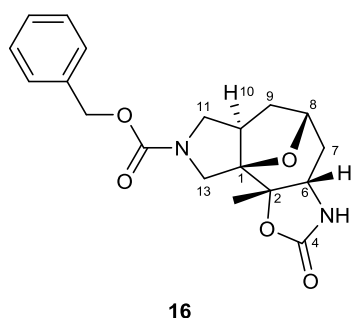

Methyl chloroformate (130  $\mu$ L, 1.70 mmol, 10.0 eq.) was added to a stirred solution of compound **13** (74 mg, 0.17 mmol, 1.00 eq.) and Et<sub>3</sub>N (240  $\mu$ L, 1.70 mmol, 10.0 eq.) in CH<sub>2</sub>Cl<sub>2</sub> at 0 °C. The reaction mixture was warmed to rt and stirred for 15 h. The reaction mixture was diluted with CH<sub>2</sub>Cl<sub>2</sub> (20 mL) and washed with sat. aq. NH<sub>4</sub>Cl solution (25 mL). The aqueous layer was extracted with CH<sub>2</sub>Cl<sub>2</sub> (2  $\times$  10 mL).

The combined organic phases were washed with brine (25 mL), then dried over MgSO<sub>4</sub>, filtered, and concentrated *in vacuo* to give a colourless oil (75 mg), which was carried on to the next step without further purification. The residue was diluted in THF (5 mL) and TBAF (1.0 M in THF, 0.38 mL, 0.38 mmol, 2.25 eq.) was added. The reaction mixture was stirred for 0.5 h, then concentrated *in vacuo*. Purification by SCX SPE following general procedure **A**, eluting with MeOH gave a colourless oil (39 mg), which was carried on to the next step without further purification. The residue was diluted



in DMF (3.0 mL) and NaH (60% dispersion in oil, 20 mg, 0.5 mmol, 3.0 eq.) was added. The reaction mixture was stirred at rt for 15 h, then sat. aq. NH<sub>4</sub>Cl solution (0.2 mL) was added. The reaction mixture was diluted in EtOAc (25 mL) and washed with brine (10 mL). The aqueous phase was extracted with EtOAc (2 × 10 mL), then then dried over MgSO<sub>4</sub>, filtered, and concentrated *in vacuo*. Flash chromatography eluting with 98:2:0.1 CH<sub>2</sub>Cl<sub>2</sub>–EtOH–NH<sub>3</sub>/MeOH gave the *title compound 16* (20 mg, 56 μmol, 34%, [three steps]) as a colourless oil. *R<sub>f</sub>* 0.07 (98:2:0.1 CH<sub>2</sub>Cl<sub>2</sub>–EtOH–NH<sub>3</sub>/MeOH). <sup>1</sup>H NMR (500 MHz, CHCl<sub>3</sub>, 50:50 mixture of rotamers): δ 7.41-7.28 (5H, m, Cbz Ar-H), 5.12 (2H, s, OCH<sub>2</sub>Ph), 5.10 (1H, s, NH), 4.64-4.58 (1H, m, 8-H), 4.00-3.89 (1H, m, 11-H<sub>A</sub>), 3.88-3.81 (1H, m, 6-H), 3.80-3.62 (2H, m, 13-H), 3.31-3.17 (1H, m, 11-H<sub>B</sub>), 3.07-2.92 (1H, m, 10-H), 2.33-2.23 (1H, m, 9-H<sub>A</sub>), 2.17-2.09 (1H, m, 7-H<sub>A</sub>), 2.03-1.91 (1H, m, 9-H<sub>B</sub>), 1.76 (1H, dd, *J* 15.8, 3.2, 7-H<sub>B</sub>), 1.56 (1.5H, s, CH<sub>3</sub>), 1.55 (1.5H, s, CH<sub>3</sub>). <sup>13</sup>C NMR (100 MHz, CHCl<sub>3</sub>, mixture of two rotamers): δ 159.1 (oxazolidinone N(CO)O), 154.5 (Cbz N(CO)O), 136.9 (Ar-C<sub>q</sub>), 128.6 (Ar-C), 128.1 (Ar-C), 128.1 (Ar-C), 93.2 (1-C), 92.3 (1-C), 80.1 (2-C), 80.0 (2-C), 76.2 (8-C), 76.1 (8-C), 67.1 (OCH<sub>2</sub>Ph), 56.4 (6-C), 55.0 (11-C), 54.6 (11-C), 51.5 (13-C), 51.0 (13-C), 41.4 (10-C), 40.5 (10-C), 37.4 (9-C), 37.3 (9-C), 32.6 (7-C), 21.7 (C<sub>q</sub>CH<sub>3</sub>) [24 of 34 expected peaks observed]. IR *v*<sub>max</sub>(film)/cm<sup>-1</sup> 3275 (NH), 2954, 2884, 1757 (CO), 1697, 1420, 1114, 958. HRMS (ESI): C<sub>19</sub>H<sub>23</sub>N<sub>2</sub>O<sub>5</sub> [M+H]<sup>+</sup>; calculated 359.1601, found 359.1602.

**16 NOESY correlations:**

- 6-H:** 7-H<sub>A</sub>; C<sub>q</sub>CH<sub>3</sub>
- 7-H<sub>B</sub>:** 7-H<sub>A</sub>; C<sub>q</sub>CH<sub>3</sub>
- 8-H:** 7-H<sub>B</sub>; 9-H<sub>B</sub>
- 9-H<sub>B</sub>:** 7-H<sub>A</sub>; 9-H<sub>B</sub>

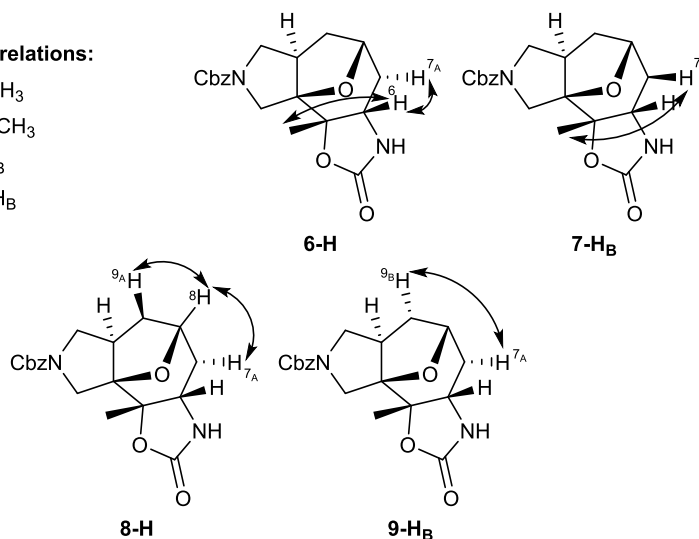

#### 5.4.2.4 Scaffolds derived from cycloadduct 2d

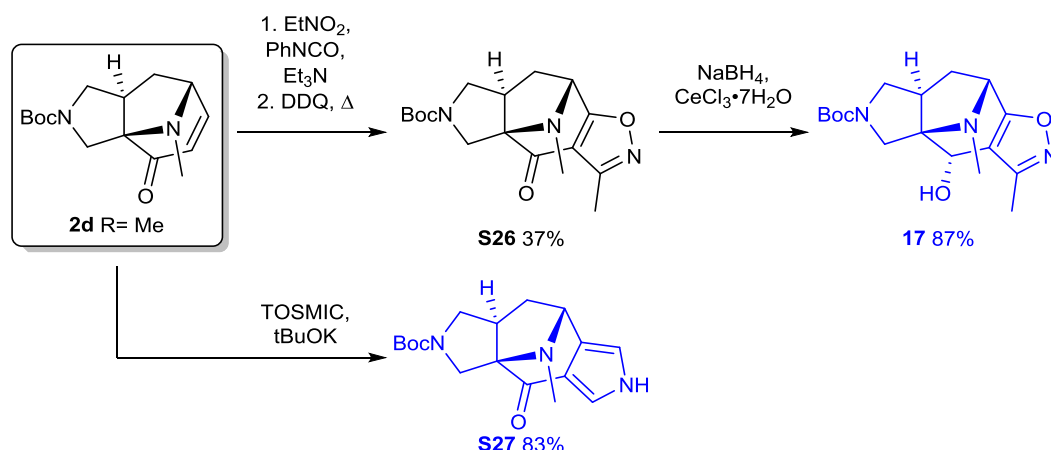

##### 5.4.2.4.1 Preparation of scaffold 17

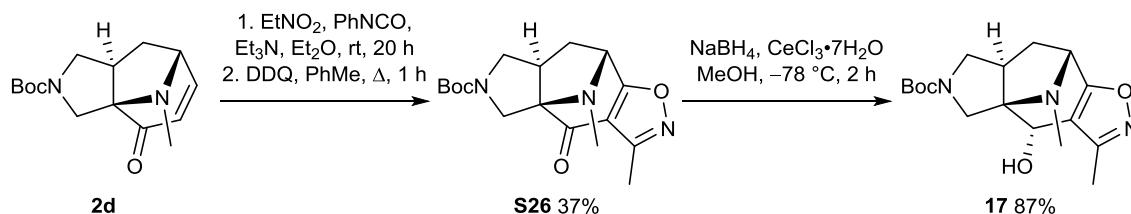

#### *tert*-Butyl (1*R*\*,8*R*\*,10*R*\*)-4,14-dimethyl-2-oxo-6-oxa-5,12,14-triazatetracyclo[6.5.1.0<sup>1,10</sup>.0<sup>3,7</sup>]tetradeca-3(7),4-diene-12-carboxylate S26

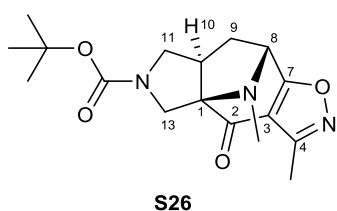

To a stirred solution of enone **2d** (1.21 g, 4.35 mmol, 1.00 eq.) in Et<sub>2</sub>O (9.0 mL) at rt was added nitroethane (0.62 mL, 8.70 mmol, 2.00 eq.), trimethylamine (30 μL, 0.22 mmol, 0.05 eq.) and phenylisocyanate (1.89 mL, 17.4 mmol, 4.00 eq.). The resulting solution was stirred for 20 h and then filtered and concentrated *in vacuo* to give a crude orange oil. The crude material was dissolved in PhMe (20 mL) and DDQ (1.97 g, 8.70 mmol, 2.00 eq.) was added. The resulting suspension was heated at reflux for 1 h, cooled, filtered through celite and concentrated *in vacuo* to give a crude oil. Flash chromatography eluting with 9:1 CH<sub>2</sub>Cl<sub>2</sub>-EtOAc gave the *title compound* **S26** (531 mg, 1.59 mmol, 36%) as a pale yellow oil. <sup>1</sup>H NMR (MeOD-d<sub>4</sub>, 500 MHz, 333 K): δ 4.56 (1H, d, *J* 6.3, 8-H), 4.05 (1H, d, *J* 12.5, 13-H), 3.79 (1H, dd, *J* 10.8, 9.4, 11-H<sub>B</sub>), 3.29 (1H, d, *J* 12.5, 13-H<sub>A</sub>), 3.23 (1H, dd, *J* 10.8, 7.6, 11-H<sub>A</sub>), 2.58 (1H, app. qd, *J* 8.7, 4.8, 10-H), 2.33 (3H, s, NCH<sub>3</sub>), 2.20 (3H, s, C<sub>q</sub>CH<sub>3</sub>), 2.17 (1H, ddd, *J* 12.7, 6.3, 4.6, 9-H<sub>B</sub>), 2.02 (1H, dd, *J* 12.7, 8.6, 9-H<sub>A</sub>), 1.38 (9H, s, C<sub>q</sub>(CH<sub>3</sub>)<sub>3</sub>). <sup>13</sup>C NMR (MeOD-d<sub>4</sub>,

125 MHz, 333 K, one C not observed): 192.2, 182.5, 158.2, 156.0, 112.0, 82.9, 81.2, 64.0, 54.5, 46.8, 46.3, 36.1, 32.5, 28.6, 10.4. **IR**  $\nu_{\text{max}}(\text{film})/\text{cm}^{-1}$  1692, 1646, 1407, 1167. **HRMS** (ESI):  $\text{C}_{17}\text{H}_{24}\text{N}_3\text{O}_4$   $[\text{M}+\text{H}]^+$ ; calculated 334.1761, found 334.1764. The regioselectivity was confirmed by determination of the structure of the fragment **F21** in complex with ATAD2, and is consistent with precedent.<sup>S10</sup>

**tert-Butyl (1R\*,2S\*,8R\*,10R\*)-2-hydroxy-4,14-dimethyl-6-oxa-5,12,14-triazatetracyclo[6.5.1.0<sup>1,10</sup>.0<sup>3,7</sup>]tetradeca-3(7),4-diene-12-carboxylate 17**

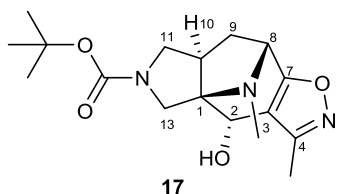

To a stirred solution of isoxazole **S26** (498 mg, 1.48 mmol, 1.00 eq.) in MeOH (7.0 mL) at  $-78\text{ }^\circ\text{C}$  was added  $\text{CeCl}_3 \cdot 7\text{H}_2\text{O}$  (664 mg, 1.78 mmol, 1.20 eq.) followed by  $\text{NaBH}_4$  (67 mg, 1.78 mmol, 1.20 eq.). After 2 h, the solvent was removed *in vacuo* and the residue dissolved in  $\text{CH}_2\text{Cl}_2$  (10 mL) and  $\text{H}_2\text{O}$  (10 mL). The layers were separated and the aqueous layer extracted with  $\text{CH}_2\text{Cl}_2$  (2 x 10 mL). The combined organic layers were dried over  $\text{MgSO}_4$ , filtered and concentrated *in vacuo* to give a crude colourless oil. Flash chromatography eluting with 3:2  $\text{CH}_2\text{Cl}_2$ –EtOAc gave the *title compound* **17** (431 mg, 1.29 mmol, 87%) as a colourless oil. **<sup>1</sup>H NMR** (MeOD- $d_4$ , 500 MHz, 333 K):  $\delta$  4.91 (1H, d,  $J$  8.0, 2-H), 4.20 (1H, d,  $J$  5.7, 8-H), 3.82-3.67 (1H, m, 11- $\text{H}_A$ ), 3.60 (1H, d,  $J$  12.0, 13- $\text{H}_A$ ), 3.51 (1H, app. t,  $J$  10.1, 11- $\text{H}_B$ ), 3.39-3.25 (1H, m, 13- $\text{H}_B$ ), 3.14-3.00 (1H, m, 10-H), 2.38 (3H, s,  $\text{CH}_3$ ), 2.33 (3H, s,  $\text{CH}_3$ ), 2.19-2.07 (1H, m, 9- $\text{H}_B$ ), 2.06-1.96 (1H, m, 9- $\text{H}_A$ ), 1.49 (9H, s,  $\text{C}_q(\text{CH}_3)_3$ ). **<sup>13</sup>C NMR** (MeOD- $d_4$ , 125 MHz, 333 K, 2 x  $\text{C}_q$  and 2 x depressed pyrrolidine carbons not observed): 158.5, 154.9, 111.1, 79.7, 62.7, 61.2, 38.1, 30.5, 27.3, 8.9. **IR**  $\nu_{\text{max}}(\text{film})/\text{cm}^{-1}$  3334, 1649, 1419, 1166. **HRMS** (ESI):  $\text{C}_{17}\text{H}_{26}\text{N}_3\text{O}_4$   $[\text{M}+\text{H}]^+$ ; calculated 336.1923, found 336.1918.

**5.4.2.4.2 Preparation of scaffold S27**

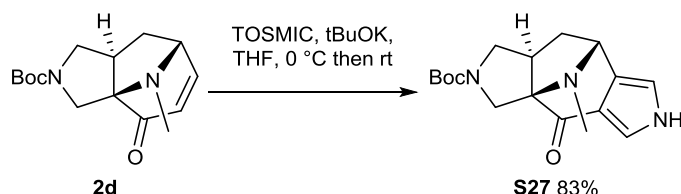

***tert*-Butyl (1*R*\*,8*R*\*,10*R*\*)-14-methyl-2-oxo-5,12,14-triazatetracyclo[6.5.1.0<sup>1,10</sup>.0<sup>3,7</sup>]tetradeca-3,6-diene-12-carboxylate **S27****

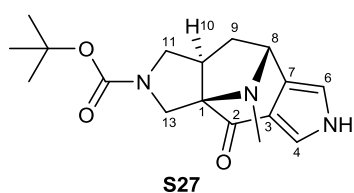

To a solution of cycloadduct **2d** (1.80 g, 6.47 mmol, 1.00 eq.) in THF (32 mL) at 0 °C was added TOSMIC (1.26 g, 6.47 mmol, 1.00 eq) followed by *t*BuOK (2.18 g, 19.4 mmol, 3.00 eq.). The resulting suspension was warmed to rt and stirred for 2 h. Sat. aq. NH<sub>4</sub>Cl solution (50 mL) and EtOAc (50 mL) were added and the layers were separated. The aqueous layer was extracted with EtOAc (2 x 50 mL). The combined organic layers were dried over MgSO<sub>4</sub>, filtered and concentrated *in vacuo* to give a yellow oil. Flash chromatography 97:3:0.3 CH<sub>2</sub>Cl<sub>2</sub>–EtOAc–NH<sub>4</sub>OH gave the *title compound* **S27** (1.71 g, 5.39 mmol, 83%) as a yellow oil. <sup>1</sup>H NMR (500 MHz, MeOD-d<sub>4</sub>, 333 K): δ 7.27 (1H, d, *J* 1.7, 4-H), 6.53 (1H, d, *J* 1.7, 6-H), 4.26 (1H, d, *J* 6.0, 8-H), 4.13 (1H, d, *J* 12.3, 13-H<sub>A</sub>), 3.77 (1H, dd, 10.9, 9.5, 11-H<sub>B</sub>), 3.29-3.18 (2H, m, 11-H<sub>A</sub> and 13-H<sub>B</sub>), 2.59 (1H, app. qd, *J* 8.8, 5.1, 10-H), 2.14 (3H, s, NCH<sub>3</sub>), 2.02-2.09 (1H, m, 9-H<sub>B</sub>), 1.87 (1H, dd, *J* 12.0, 8.8, 9-H<sub>A</sub>), 1.38 (9H, s, C<sub>q</sub>(CH<sub>3</sub>)<sub>3</sub>). <sup>13</sup>C NMR (125 MHz, MeOD-d<sub>4</sub>, 333 K, one C not observed): 194.6, 156.3, 128.9, 121.7, 118.6, 114.9, 81.0, 63.1, 54.7, 47.5, 46.8, 39.4, 33.0, 28.7. IR  $\nu_{\text{max}}$ (film)/cm<sup>-1</sup> 3271, 2972, 1655, 1518, 1476, 1448, 1417, 1392, 1349, 1166, 1121. HRMS (ESI): C<sub>17</sub>H<sub>24</sub>N<sub>3</sub>O<sub>3</sub> [M+H]<sup>+</sup>; calculated 318.1812, found 318.1820.

**5.4.2.5 Scaffold derived from cycloadduct 2e**

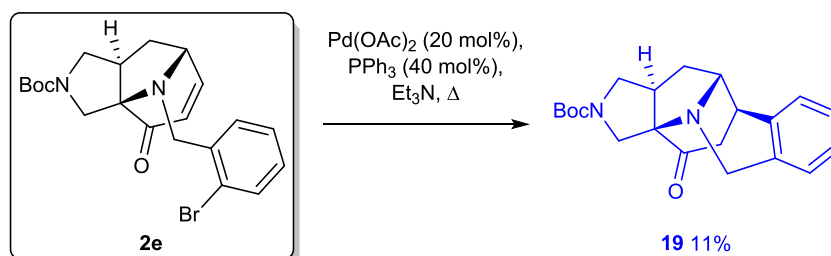

**5.4.2.5.1 Preparation of scaffold 19**

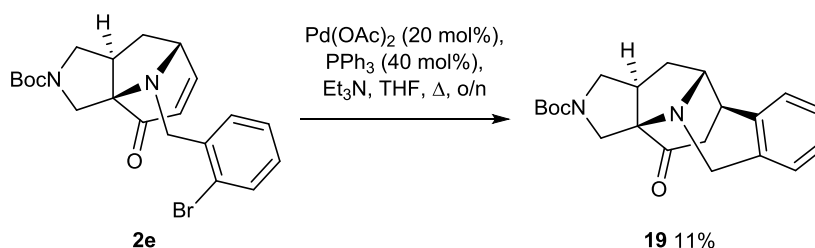

***tert*-Butyl (1*R*\*,10*R*\*,13*R*\*,17*R*\*)-12-oxo-2,15-diazapentacyclo[8.8.0.0<sup>2,13</sup>.0<sup>4,9</sup>.0<sup>13,17</sup>]octadeca-4(9),5,7-triene-15-carboxylate **19****

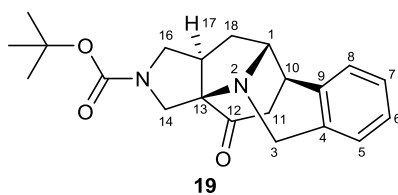

To a solution of cycloadduct **2e** (140 mg, 0.32 mmol, 1.00 eq) in THF (1.0 mL) was added Pd(OAc)<sub>2</sub> (15 mg, 65 μmol, 20 mol%), PPh<sub>3</sub> (34 mg, 0.129 mmol, 40 mol%) and Et<sub>3</sub>N (90 μL, 0.65 mmol, 2.00 eq.). The resulting suspension was heated to reflux, stirred overnight, then concentrated *in vacuo*. Flash chromatography eluting with 9:1 CH<sub>2</sub>Cl<sub>2</sub>:EtOAc, followed by mass-directed preparative HPLC (50-90% MeOH–H<sub>2</sub>O) gave the *title compound* **19** (12 mg, 34 μmol, 11%) as a brown oil. **<sup>1</sup>H NMR** (500 MHz, MeOD-d<sub>4</sub>, 333 K): δ 7.10-7.01 (2H, m, Ar-H), 6.95-6.90 (2H, m, Ar-H), 4.24 (1H, d, *J* 18.6, 3-H<sub>A</sub>), 3.93 (1H, d, *J* 18.6, 3-H<sub>B</sub>), 3.83 (1H, dd, *J* 10.3, 9.6, 16-H<sub>B</sub>), 3.74 (1H, d, *J* 12.6, 14-H<sub>A</sub>), 3.67 (1H, d, *J* 6.6, 1-H), 3.31 (1H, d, *J* 12.6, 14-H<sub>B</sub>), 3.24 (1H, d, *J* 6.3, 10-H), 3.17 (1H, d, *J* 9.6, 16-H<sub>A</sub>), 3.02 (1H, dd, *J* 15.0, 6.3, 11-H<sub>B</sub>), 2.82 (1H, app. qd, *J* 9.1, 3.1, 17-H), 2.30 (1H, dd, *J* 13.4, 8.8, 18-H<sub>A</sub>), 2.10 (1H, ddd, *J* 13.4, 6.6, 3.1, 18-H<sub>B</sub>), 2.04 (1H, d, *J* 15.0, 11-H<sub>A</sub>), 1.37 (9H, s, C<sub>q</sub>(CH<sub>3</sub>)<sub>3</sub>). **<sup>13</sup>C NMR** (125 MHz, MeOD-d<sub>4</sub>, 333 K): δ 197.8, 156.1, 140.3, 133.0, 128.9, 128.2, 127.8, 126.7, 93.4, 81.1, 60.8, 49.4, 49.2, 47.3, 46.3, 44.8, 33.5, 28.7 (2 peaks). **LRMS** (HPLC-MS): C<sub>21</sub>H<sub>27</sub>N<sub>2</sub>O<sub>3</sub>; found 355.2 [M+H]<sup>+</sup>.

### 5.4.2.6 Scaffolds derived from cycloadduct 2f

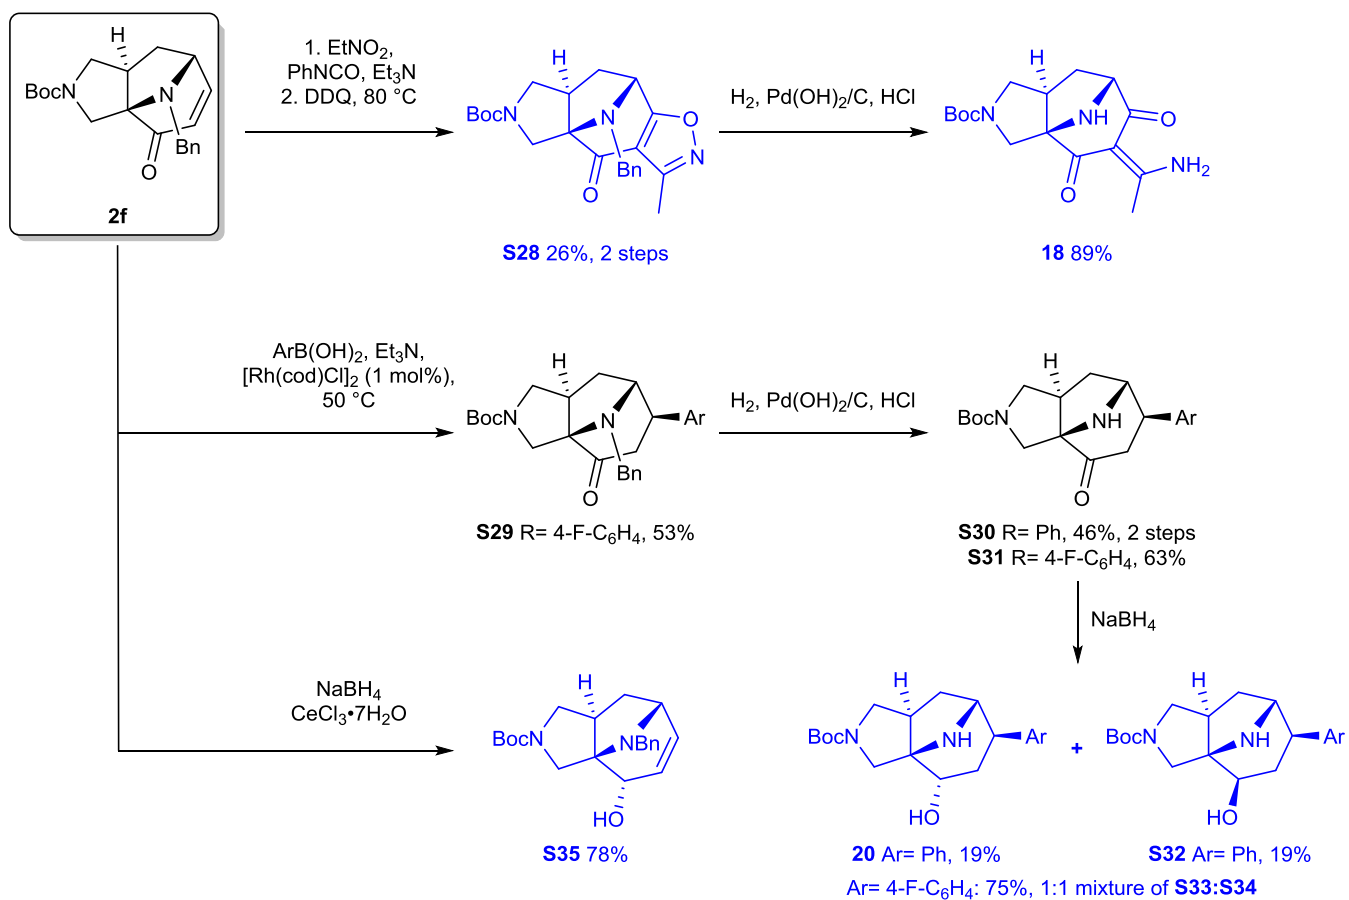

### 5.4.2.6.1 Preparation of scaffold 18

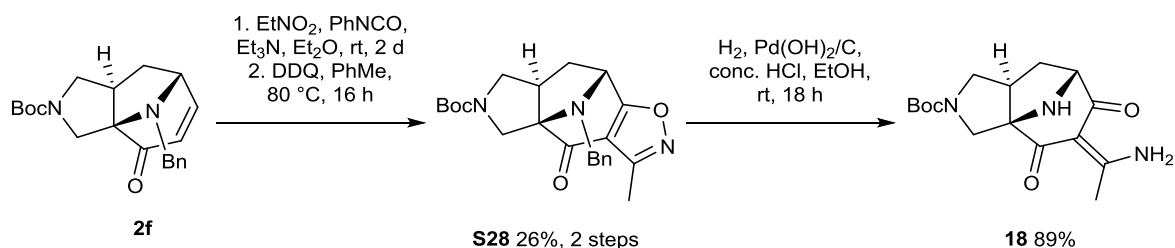

### *tert*-Butyl (1*R*\*,8*R*\*,10*R*\*)-14-benzyl-4-methyl-2-oxo-6-oxa-5,12,14-triazatetracyclo[6.5.1.0<sup>1,10</sup>.0<sup>3,7</sup>]tetradeca-3(7),4-diene-12-carboxylate **S28**

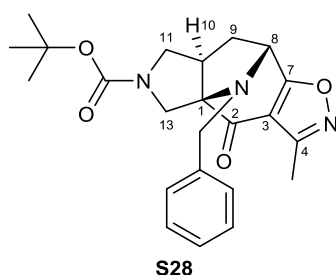

To a stirred solution of cycloadduct **2f** (1.80 g, 5.08 mmol, 1.00 eq.) in Et<sub>2</sub>O (10 mL) at rt was added EtNO<sub>2</sub> (0.73 mL, 10.2 mmol, 2.00 eq.), PhNCO (2.21 mL, 20.3 mmol, 4.00 eq.) and Et<sub>3</sub>N (0.05 mL, 0.254 mmol, 5 mol%). The resulting solution was stirred at rt for 2 days (during which time a colourless solid precipitated). The suspension was filtered (washing with Et<sub>2</sub>O) and the filtrate was evaporated to give a brown oil.

The residue was dissolved in PhMe (25 mL) and DDQ (2.31 g, 10.2 mmol, 2.00 eq.) was added. The resulting suspension was heated to 80 °C for 16 h, then filtered through celite and concentrated *in vacuo* to give a crude brown oil. Flash chromatography eluting with 4:1 CH<sub>2</sub>Cl<sub>2</sub>–EtOAc gave the *title compound* **S28** (549 mg, 1.34 mmol, 26%) as a yellow oil. <sup>1</sup>H NMR (500 MHz, MeOD-d<sub>4</sub>, 333 K): δ 7.32–7.22 (3H, m, Bn Ar-H), 7.19–7.12 (2H, m, Bn Ar-H), 4.50–4.44 (1H, m, 8-H), 4.19 (1H, d, *J* 12.6, 13-H<sub>A</sub>), 3.91 (1H, dt, *J* 11.0, 9.2, 11-H<sub>B</sub>), 3.84 (1H, d, *J* 13.9, CH<sub>A</sub>H<sub>B</sub>Ph), 3.53 (1H, d, *J* 12.6, 13-H<sub>B</sub>), 3.43 (1H, dd, *J* 11.0, 7.4, 11-H<sub>A</sub>), 3.41 (1H, d, *J* 13.9, CH<sub>A</sub>H<sub>B</sub>Ph), 2.72 (1H, dddd, *J* 9.2, 8.6, 7.4, 5.3, 10-H), 2.46 (3H, s, CH<sub>3</sub>), 2.21 (1H, dd, *J* 12.7, 5.3, 9-H<sub>A</sub>), 2.11 (1H, dd, *J* 12.7, 5.3, 9-H<sub>B</sub>), 1.48 (9H, s, C<sub>q</sub>(CH<sub>3</sub>)<sub>3</sub>). <sup>13</sup>C NMR (125 MHz, MeOD-d<sub>4</sub>, 333 K): δ 192.7, 182.9, 158.3, 156.1, 139.1, 129.6, 129.3, 128.6, 112.7, 82.5, 81.3, 60.7, 54.1, 50.8, 47.5, 47.0, 36.0, 28.7, 10.3. IR *v*<sub>max</sub>(film)/cm<sup>-1</sup> 1691, 1455, 1406, 1365, 1167, 1139, 1113, 869. HRMS (ESI): C<sub>23</sub>H<sub>28</sub>N<sub>3</sub>O<sub>4</sub> [M+H]<sup>+</sup>; calculated 410.2074, found 410.2080.

**tert-Butyl (1R\*,5R\*,7R\*,9E)-9-(1-aminoethylidene)-8,10-dioxo-3,11-diazatricyclo[5.3.1.0<sup>1,5</sup>]undecane-3-carboxylate **18****

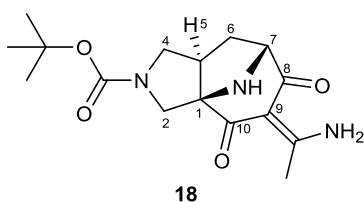

Hydrogenation was carried out following general procedure **B**, using isoxazole **S28** (537 mg, 1.31 mmol, 1.00 eq), Pd(OH)<sub>2</sub>/C (54 mg, 10% w/w) and conc. HCl (0.1 mL) in EtOH (7.0 mL) over 18 h. Filtration followed by concentration gave the *title compound* **18** (373 mg, 1.16 mmol, 89%) as a clear, colourless oil. <sup>1</sup>H NMR (500 MHz, MeOD-d<sub>4</sub>, 333 K, 3 × NH not observed): δ 4.20 (1H, d, *J* 12.1, 2-H<sub>A</sub>), 3.78 (1H, dd, *J* 10.8, 9.4, 4-H<sub>A</sub>), 3.77-3.73 (1H, m, 7-H), 3.24 (1H, d, *J* 12.1, 2-H<sub>B</sub>), 3.10 (1H, dd, *J* 10.8, 8.3, 4-H<sub>B</sub>), 2.64-2.53 (1H, m, 5-H), 2.39 (3H, s, C<sub>q</sub>CH<sub>3</sub>), 1.98-1.91 (2H, m, 6-H), 1.37 (9H, s, C<sub>q</sub>(CH<sub>3</sub>)<sub>3</sub>). <sup>13</sup>C NMR (125 MHz, MeOD-d<sub>4</sub>, 333 K): δ 201.4, 196.9, 177.6, 156.1, 103.9, 80.9, 79.2, 69.0, 54.7, 50.9, 46.8, 35.6, 28.9, 24.3. LRMS (HPLC-MS): C<sub>16</sub>H<sub>23</sub>NNa<sub>3</sub>O<sub>4</sub> [M+Na]<sup>+</sup>; found 344.2.

**5.4.2.6.2 Preparation of scaffolds **20** and **S32-S34****

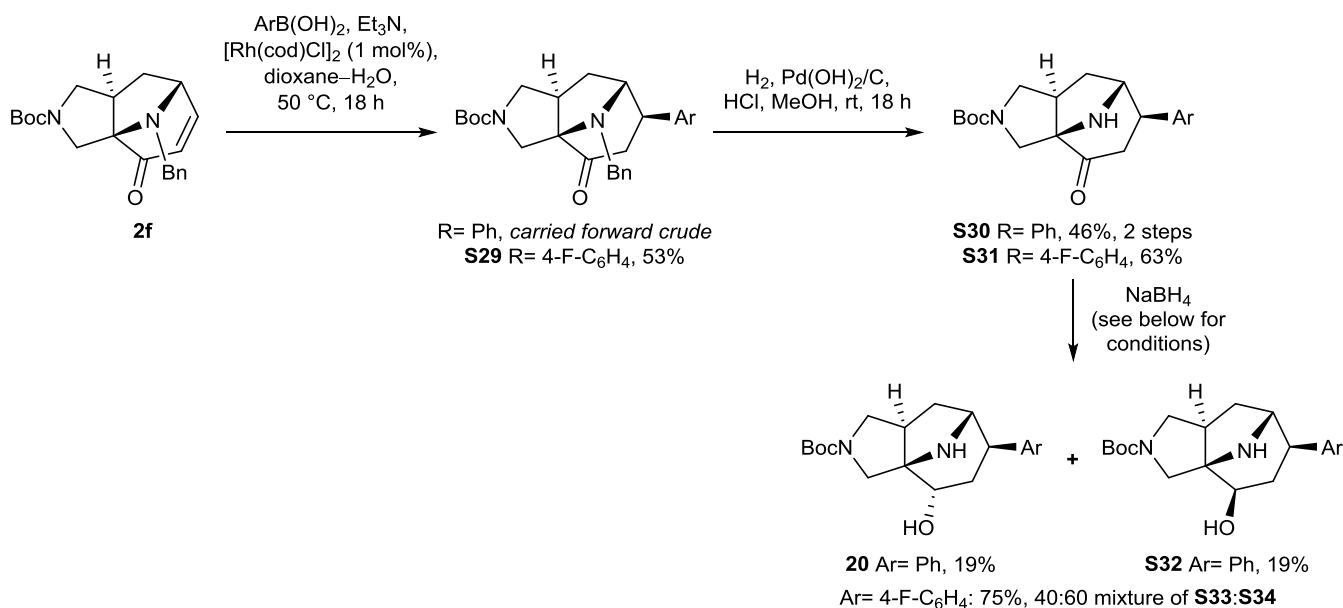

**General procedure L: Arylation of α,β-unsaturated ketone **2f****

To a solution of cycloadduct **2f** (1.0 eq.) in 86:14 dioxane–H<sub>2</sub>O (0.3 M) was added ArB(OH)<sub>2</sub> (1.5 eq.), Et<sub>3</sub>N (1.0 eq.) and [Rh(cod)Cl]<sub>2</sub> (1 mol%). The resulting solution was warmed to 50 °C for 2 h before being concentrated *in vacuo*. The products were purified by flash chromatography.



***tert*-Butyl (1*R*\*,5*R*\*,7*R*\*,8*R*\*)-11-benzyl-8-(4-fluorophenyl)-10-oxo-3,11-diazatricyclo[5.3.1.0<sup>1,5</sup>]undecane-3-carboxylate **S29****

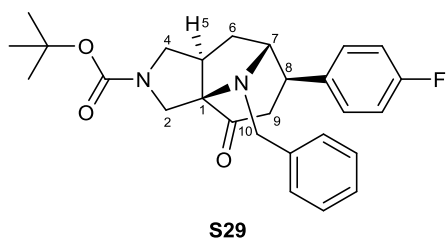

**S29**

General procedure **L** was followed using cycloadduct **2f** (512 mg, 1.44 mmol) and 4-fluorophenylboronic acid. Flash chromatography eluting with 95:5 CH<sub>2</sub>Cl<sub>2</sub>–EtOAc gave the *title compound* **S29** (342 mg, 0.76 mmol, 53%) as a colourless oil.

**<sup>1</sup>H NMR** (500 MHz, DMSO-*d*<sub>6</sub>, 343 K): δ 7.13-6.93 (7H, m, includes 5H, Bn Ar-H; and 2H, Ar 2-H), 6.84 (2H, d, *J* 7.0, Ar 3-H), 3.84 (1H, app. t, *J* 10.4, 4-H<sub>A</sub>), 3.81 (1H, d, *J* 13.3, 2-H<sub>A</sub>), 3.65 (1H, d, *J* 14.2, NCH<sub>A</sub>H<sub>B</sub>Ph), 3.60-3.45 (2H, m, 2-H<sub>B</sub> and 7-H), 3.36 (1H, d, *J* 14.2, NCH<sub>A</sub>H<sub>B</sub>Ph), 3.27 (1H, app. d, *J* 8.6, 8-H), 3.18 (1H, dd, *J* 11.0, 7.6, 4-H<sub>B</sub>), 3.11-3.05 (1H, m, 5-H), 3.01 (1H, dd, *J* 16.5, 8.7, 9-H<sub>A</sub>), 2.55-2.45 (1H, m, 9-H<sub>B</sub>), 2.27 (1H, dd, *J* 13.1, 8.6, 6-H<sub>A</sub>), 2.19 (1H, ddd, *J* 13.1, 6.5, 4.7, 6-H<sub>B</sub>), 1.35 (9H, s, C<sub>q</sub>(CH<sub>3</sub>)<sub>3</sub>). **<sup>13</sup>C NMR** (125 MHz, DMSO-*d*<sub>6</sub>, 343 K, one C not observed): δ 204.4, 160.8 (d, *J* 238), 161.7, 159.8, 153.1, 140.1 (d, *J* 164), 129.2 (d, *J* 8.0), 128.2, 127.6, 126.4, 114.4 (d, *J* 21), 78.6, 68.8, 54.4, 52.1, 46.5, 45.2, 38.9, 35.6, 28.1. **IR** *v*<sub>max</sub>(film)/cm<sup>-1</sup> 1680, 1023, 990, 826. **HRMS** (ESI): C<sub>27</sub>H<sub>32</sub>FN<sub>2</sub>O<sub>3</sub> [M+H]<sup>+</sup>; calculated 451.2396, found 451.2396.

***tert*-Butyl (1*R*\*,5*R*\*,7*R*\*,8*R*\*)-10-oxo-8-phenyl-3,11-diazatricyclo[5.3.1.0<sup>1,5</sup>]undecane-3-carboxylate **S30****

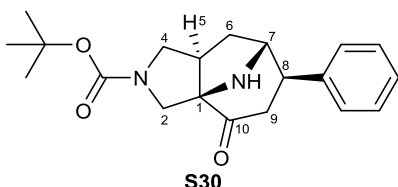

**S30**

General procedure **L** was followed using cycloadduct **2f** (484 mg, 1.37 mmol) and PhB(OH)<sub>2</sub>. Flash chromatography eluting with 9:1 CH<sub>2</sub>Cl<sub>2</sub>–EtOAc gave the crude ketone, which was contaminated with PhB(OH)<sub>2</sub> {**<sup>1</sup>H NMR peaks** (MeOD-*d*<sub>4</sub>, 500 MHz, 333 K,

characteristic peaks): δ 7.24-7.09 (5H, m, Bn Ar-H), 7.10-6.98 (3H, m, Ar-H), 6.89-6.73 (2H, m, Ar-H), 4.00-3.84 (2H, m, 2-H<sub>A</sub> and 4-H<sub>A</sub>), 3.73 (1H, d, *J* 14.1, CH<sub>A</sub>H<sub>B</sub>Ph), 3.73 (1H, s, 7-H), 3.67-3.53 (1H, m, 8-H), 3.40 (1H, d, *J* 14.2, CH<sub>A</sub>H<sub>B</sub>Ph), 3.33-3.23 (2H, m, 2-H<sub>B</sub> and 4-H<sub>B</sub>), 3.15-3.04 (1H, m, 5-H), 3.00 (1H, dd, *J* 16.5, 8.6, 9-H<sub>B</sub>), 2.76 (1H, ddd, *J* 16.5, 2.3, 1.4, 9-H<sub>A</sub>), 2.34 (1H, dd, *J* 13.1, 8.9, 6-H<sub>A</sub>), 2.23 (1H, ddd, *J* 13.1, 6.4, 5.0, 6-H<sub>B</sub>), 1.44 (9H, s, C<sub>q</sub>(CH<sub>3</sub>)<sub>3</sub>). **LRMS** (HPLC-MS): C<sub>20</sub>H<sub>27</sub>N<sub>2</sub>O<sub>3</sub> [M+H]<sup>+</sup>; found 433.5}. Hydrogenation of the crude residue was carried out following general procedure **B**, using Pd(OH)<sub>2</sub>/C (44 mg, 10 w/w%) and conc. HCl (0.1 mL) in MeOH (5 mL) over 18 h. Flash chromatography eluting with 1:1 CH<sub>2</sub>Cl<sub>2</sub>–EtOAc gave the amine **S30** (218 mg, 0.64 mmol, 46% over two steps) as a colourless oil. **<sup>1</sup>H NMR** (500 MHz, MeOD-*d*<sub>4</sub>, 333 K, NH not observed): δ 7.23 (2H, dd, *J* 8.2, 7.2, Ar-H), 7.15-7.10 (3H, m, Ar-H), 3.93 (1H, d, *J* 12.4, 2-H<sub>A</sub>), 3.81 (1H, dd, *J* 10.8, 9.5, 4-H<sub>B</sub>), 3.61 (1H, d, *J* 6.9, 7-H), 3.36 (1H, d, *J* 8.2, 8-H), 3.19 (1H, d, *J* 12.4, 2-

H<sub>B</sub>), 3.10 (1H, dd, *J* 10.8, 8.6, 4-H<sub>A</sub>), 2.87 (1H, dd, *J* 16.7, 8.2, 9-H<sub>B</sub>), 2.80 (1H, app. qd, *J* 8.8, 3.7, 5-H), 2.52 (1H, d, *J* 16.7, 9-H<sub>A</sub>), 2.24 (1H, dd, *J* 13.5, 8.5, 6-H<sub>A</sub>), 2.03 (1H, ddd, *J* 13.5, 6.9, 3.7, 6-H<sub>B</sub>), 1.35 (9H, s, C<sub>q</sub>(CH<sub>3</sub>)<sub>3</sub>). <sup>13</sup>C NMR (125 MHz, MeOD-d<sub>4</sub>, 333 K): δ 208.3, 156.0, 145.0, 129.7, 128.4, 127.7, 93.4, 81.0, 64.5, 54.8, 51.1, 50.7, 46.5, 39.7, 37.1, 28.7. IR  $\nu_{\text{max}}$ (film)/cm<sup>-1</sup> 3290, 1648, 1406, 1171, 1118.

***tert*-Butyl (1*R*\*,5*R*\*,7*R*\*,8*R*\*)-8-(4-fluorophenyl)-10-oxo-3,11-diazatricyclo[5.3.1.0<sup>1,5</sup>]undecane-3-carboxylate **S31****

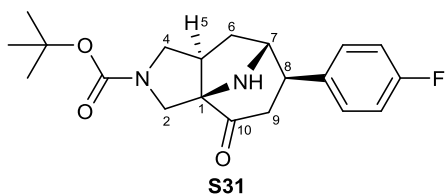

Hydrogenation was carried out following general procedure **B**, using compound **S29** (284 mg, 0.63 mmol), Pd(OH)<sub>2</sub>/C (28 mg, 10% w/w) and conc. HCl (0.1 mL) in EtOH (3 mL) over 18 h. Flash chromatography eluting with 1:1 CH<sub>2</sub>Cl<sub>2</sub>-EtOAc gave the

*title compound S31* (225 mg, 0.62 mmol, 99%) as a colourless oil. <sup>1</sup>H NMR (500 MHz, DMSO-d<sub>6</sub>, 343 K, NH not observed): δ 7.45 (2H, app. dd, *J* 8.1, 5.5, Ar 2-H), 7.16 (2H, app. t, *J* 8.7, Ar 3-H), 4.13 (1H, app. d, *J* 5.6, 7-H), 4.00 (1H, d, *J* 13.0, 2-H<sub>A</sub>), 3.84 (1H, t, *J* 10.0, 4-H<sub>A</sub>), 3.57 (1H, d, *J* 13.0, 2-H<sub>B</sub>), 3.49-3.39 (1H, m, 8-H), 3.34-3.27 (1H, m, 4-H<sub>B</sub>), 3.11-3.02 (2H, m, 9-H), 3.00 (1H, app. dd, *J* 17.3, 7.7, 5-H), 2.43 (1H, dd, *J* 13.2, 8.7, 6-H<sub>A</sub>), 2.24-2.11 (1H, m, 6-H<sub>B</sub>), 1.41 (9H, s, C<sub>q</sub>(CH<sub>3</sub>)<sub>3</sub>). <sup>13</sup>C NMR (500 MHz, DMSO-d<sub>6</sub>, 343 K, one C not observed): δ 201.8, 161.3 (d, *J* 244), 152.9, 138.4, 129.6 (d, *J* 8.0), 115.3 (d, *J* 21.0), 79.1, 63.5, 52.4, 47.2, 44.6, 42.6, 39.6, 36.0, 28.2. IR  $\nu_{\text{max}}$ (film)/cm<sup>-1</sup> 3350, 1678, 1511, 1407, 1366, 1225, 1163, 1133, 1075. HRMS (ESI): C<sub>16</sub>H<sub>18</sub>FN<sub>2</sub>O<sub>3</sub> [MH<sup>-</sup>Bu]<sup>+</sup>; calculated 305.1301, found 305.1297.

***tert*-Butyl (1*R*\*,5*R*\*,7*R*\*,8*R*\*,10*S*\*)-10-hydroxy-8-phenyl-3,11-diazatricyclo[5.3.1.0<sup>1,5</sup>]undecane-3-carboxylate **20** and *tert*-Butyl (1*R*\*,5*R*\*,7*R*\*,8*R*\*,10*R*\*)-10-hydroxy-8-phenyl-3,11-diazatricyclo[5.3.1.0<sup>1,5</sup>]undecane-3-carboxylate **S32****

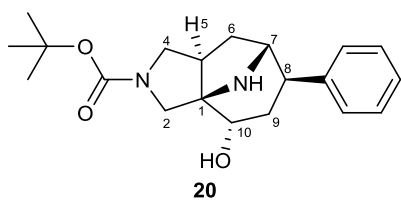

**20**

+

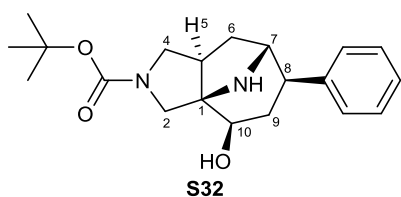

**S32**

To a stirred solution of compound **S31** (213 mg, 0.62 mmol, 1.00 eq.) in MeOH (3.0 mL) at rt was added NaBH<sub>4</sub> (26 mg, 0.69 mmol, 1.10 eq.). The resulting solution was stirred for 2 h. The reaction was quenched by addition of sat. aq. NH<sub>4</sub>Cl solution (5 mL). CH<sub>2</sub>Cl<sub>2</sub> (5 mL) was added and the layers were separated. The aqueous layer was extracted with CH<sub>2</sub>Cl<sub>2</sub> (2 x 5 mL). The combined organic layers were

dried over MgSO<sub>4</sub>, filtered and concentrated *in vacuo*.<sup>\*</sup> Flash chromatography eluting with 9:1 CH<sub>2</sub>Cl<sub>2</sub>–EtOAc gave the *title compounds* **20** (40 mg, 0.12 mmol, 19%) and **S32** (40 mg, 0.12 mmol, 19%), both as a colourless solids.

***tert*-Butyl (1*R*\*,5*R*\*,7*R*\*,8*R*\*,10*S*\*)-10-hydroxy-8-phenyl-3,11-diazatricyclo[5.3.1.0<sup>1,5</sup>]undecane-3-carboxylate **20**:**

**<sup>1</sup>H NMR** (500 MHz, MeOD-d<sub>4</sub>, 333 K): δ 7.23-7.10 (5H, m, Ar-H), 3.87-3.78 (1H, m, 10-H), 3.68 (1H, app. t, *J* 10.0, 4-H<sub>A</sub>), 3.57 (1H, d, *J* 11.9, 2-H<sub>A</sub>), 3.55 (1H, d, *J* 7.4, 7-H), 3.07 (1H, d, *J* 11.9, 2-H<sub>B</sub>), 2.96 (1H, dd, *J* 10.9, 8.5, 4-H<sub>B</sub>), 2.85 (1H, app. d, *J* 7.3, 8-H), 2.72 (1H, app. qd, 8.9, 8.9, 3.8, 5-H), 2.21-2.10 (1H, m, 9-H<sub>A</sub>), 1.97-1.87 (1H, m, 6-H<sub>A</sub>), 1.87-1.78 (1H, m, 6-H<sub>B</sub>), 1.71 (1H, ddd, *J* 14.4, 10.9, 7.2, 9-H<sub>B</sub>), 1.28 (9H, s, C<sub>q</sub>(CH<sub>3</sub>)<sub>3</sub>). **<sup>13</sup>C NMR** (125 MHz, MeOD-d<sub>4</sub>, 333 K, one C not observed): δ 156.2, 144.7, 129.5, 128.8, 127.1, 80.7, 67.8, 64.1, 63.9, 55.2, 52.0, 47.7, 40.0, 32.6, 28.8. **IR**  $\nu_{\text{max}}$ (film)/cm<sup>-1</sup> 3408, 1671, 1411, 1172, 1103. **HRMS** (ESI): C<sub>20</sub>H<sub>29</sub>N<sub>2</sub>O<sub>3</sub> [M+H]<sup>+</sup>; calculated 345.2178, found 345.2174.

***tert*-Butyl (1*R*\*,5*R*\*,7*R*\*,8*R*\*,10*R*\*)-10-hydroxy-8-phenyl-3,11-diazatricyclo[5.3.1.0<sup>1,5</sup>]undecane-3-carboxylate **S32**:**

**<sup>1</sup>H NMR** (500 MHz, MeOD-d<sub>4</sub>, 333 K): δ 7.63 (2H, d, *J* 7.8, Ar-H), 7.29 (2H, t, *J* 7.8, Ar-H), 7.17 (1H, t, *J* 7.8, Ar-H), 3.84 (1H, dd, *J* 11.0, 9.7, 4-H<sub>B</sub>), 3.79-3.72 (2H, m, 7-H and 10-H), 3.48 (1H, d, *J* 12.2, 2-H<sub>A</sub>), 3.36 (1H, d, *J* 12.2, 2-H<sub>B</sub>), 3.17 (1H, dd, *J* 11.0, 8.3, 4-H<sub>A</sub>), 2.70 (1H, d, *J* 8.2, 8-H), 2.52 (1H, app. qd, *J* 8.7, 3.9, 5-H), 2.26 (1H, ddd, *J* 15.7, 8.1, 4.7, 9-H<sub>B</sub>), 2.15-1.87 (3H, m, 6-H and 9-H<sub>A</sub>), 1.44 (9H, s, C<sub>q</sub>(CH<sub>3</sub>)<sub>3</sub>). **<sup>13</sup>C NMR** (125 MHz, MeOD-d<sub>4</sub>, 333 K): δ 155.1, 144.9, 128.4, 128.3, 125.9, 79.9, 74.3, 69.9, 63.1, 55.2, 54.8, 43.6, 42.4, 36.2, 29.9, 27.0. **IR**  $\nu_{\text{max}}$ (film)/cm<sup>-1</sup> 3410, 1672, 1411, 1170, 1108. **HRMS** (ESI): C<sub>20</sub>H<sub>29</sub>N<sub>2</sub>O<sub>3</sub> [M+H]<sup>+</sup>; calculated 345.2178, found 345.2174. **X-ray crystallography**: CCDC 1526778 contains the supplementary crystallographic data for this compound. Crystals were grown by slow evaporation from dichloromethane.

---

<sup>\*</sup> Analysis of the crude product by <sup>1</sup>H NMR spectroscopy at 500 MHz showed a 1:1 mixture of **20** and **S32**.

S32 Crystal structure:

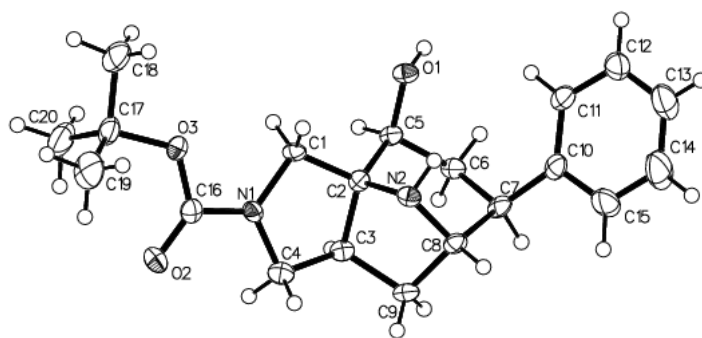

***tert*-Butyl (1*R*\*,5*R*\*,7*R*\*,8*R*\*,10*S*\*)-8-(4-fluorophenyl)-10-hydroxy-3,11-diazatricyclo[5.3.1.0<sup>1,5</sup>]undecane-3-carboxylate **S33** and *tert*-Butyl (1*R*\*,5*R*\*,7*R*\*,8*R*\*,10*R*\*)-8-(4-fluorophenyl)-10-hydroxy-3,11-diazatricyclo[5.3.1.0<sup>1,5</sup>]undecane-3-carboxylate **S34****

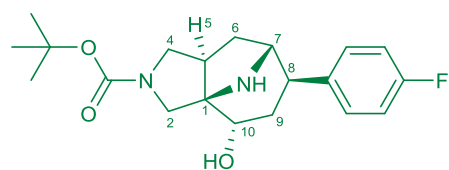

**S33**

+

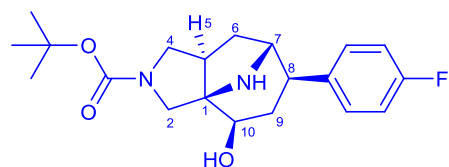

**S34**

**S33:S34** 40:60

To a stirred solution of compound **S31** (220 mg, 0.61 mmol, 1.00 eq.) in MeOH (3.0 mL) at  $-78$  °C was added  $\text{CeCl}_3 \cdot 7\text{H}_2\text{O}$  (327 mg, 0.88 mmol, 1.40 eq.) and  $\text{NaBH}_4$  (33 mg, 0.88 mmol, 1.40 eq.). The resulting solution was stirred at rt for 2 h. The reaction was quenched by addition of sat. aq.  $\text{NH}_4\text{Cl}$  solution (5 mL).  $\text{CH}_2\text{Cl}_2$  (5 mL) was added and the layers were separated. The aqueous layer was extracted with  $\text{CH}_2\text{Cl}_2$  (2 x 5 mL). The combined organic layers were dried over  $\text{MgSO}_4$ , filtered and concentrated *in vacuo*.<sup>\*</sup> Flash chromatography eluting with 9:1  $\text{CH}_2\text{Cl}_2$ –EtOAc gave the

*title compounds* **S33** and **S34** (165 mg, 0.46 mmol, 75%, 40:60 mixture of diastereomers) as a colourless oil.  $^1\text{H NMR}$  (500 MHz,  $\text{MeOD-d}_4$ , 333 K):  $\delta$  7.60–7.50 (1.2H, m, major Ar 3-H), 7.29–7.22 (0.8H, m, minor Ar 3-H), 6.98–6.82 (2H, m, major and minor Ar 2-H), 3.87 (0.4H, dd,  $J$  10.4, 5.6, minor 10-H), 3.74 (0.6H, dd,  $J$  11.0, 9.6, major 4- $\text{H}_\text{B}$ ), 3.73 (0.4H, dd,  $J$  10.8, 9.9, minor 4- $\text{H}_\text{B}$ ), 3.67 (0.6H, dd,  $J$  4.7, 1.2, major 10-H), 3.63 (0.4H, d,  $J$  11.7, minor 2- $\text{H}_\text{A}$ ), 3.62 (0.6H, d,  $J$  6.2, major 7-H), 3.58 (0.4H, d,  $J$  6.6, minor 7-H), 3.38 (0.6H, d,  $J$  12.2, major 2- $\text{H}_\text{A}$ ), 3.26 (0.6H, d,  $J$  12.2, major 2- $\text{H}_\text{B}$ ), 3.14 (0.4H, d,  $J$  11.7, minor 2- $\text{H}_\text{B}$ ), 3.06 (0.6H, dd,  $J$  11.0, 8.2, major 4- $\text{H}_\text{A}$ ), 3.00 (0.4H, dd,  $J$  11.0, 8.4, minor 4- $\text{H}_\text{A}$ ), 2.88 (0.4H, d,  $J$  6.9, minor 8-H), 2.77 (0.4H, app. qd,  $J$  8.7, 3.7, minor 5-H), 2.71 (0.6H, d,  $J$  8.1, major 8-H), 2.52 (0.6H, app. qd,  $J$  8.6, 3.8, major 5-H), 2.25 (0.6H, ddd,  $J$  15.8, 8.2, 4.7, major 9- $\text{H}_\text{A}$ ), 2.16 (0.4H, app. ddt,  $J$  14.4, 5.9, 1.3, minor 9- $\text{H}_\text{A}$ ), 2.00 (0.6H, dd,  $J$  13.2, 8.5, major 6- $\text{H}_\text{A}$ ), 1.97–1.84 (2H, m, major 6- $\text{H}_\text{B}$  and 9- $\text{H}_\text{B}$ ; minor 6- $\text{H}_\text{A}$  and 6- $\text{H}_\text{B}$ ), 1.76 (0.4H, 14.4, 10.9, 7.2, minor 9- $\text{H}_\text{B}$ ), 1.34 (5.4H, s, major  $\text{C}_\text{q}(\text{CH}_3)_3$ ), 1.34 (3.6H, s, minor  $\text{C}_\text{q}(\text{CH}_3)_3$ ). **IR**  $\nu_{\text{max}}$ (film)/ $\text{cm}^{-1}$  3350, 1678, 1511, 1407, 1366, 1225, 1163, 1133, 1075. **HRMS** (ESI):  $\text{C}_{20}\text{H}_{27}\text{FN}_2\text{O}_3$   $[\text{MH}]^+$ ; calculated 363.2078, found 363.2068.

<sup>\*</sup> Analysis of the crude product by  $^1\text{H NMR}$  spectroscopy at 500 MHz showed a 60:40 mixture of **S33** and **S34**.

### 5.4.2.6.3 Preparation of scaffold S35

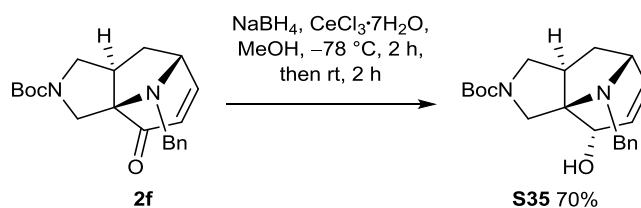

### *tert*-Butyl (1*R*\*,5*R*\*,7*R*\*,10*S*\*)-11-benzyl-10-hydroxy-3,11-diazatricyclo[5.3.1.0<sup>1,5</sup>]undec-8-ene-3-carboxylate **S35**

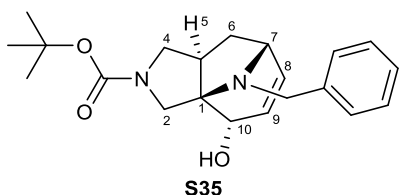

To a solution of cycloadduct **2f** (2.52 g, 7.11 mmol, 1.00 mmol) in MeOH (35 mL) at -78 °C was added CeCl<sub>3</sub>·7H<sub>2</sub>O (3.18 g, 8.53 mmol, 1.20 eq.) followed by NaBH<sub>4</sub> (323 mg, 8.53 mmol, 1.20 eq.). The resulting solution was stirred at -78 °C for 2 h and then warmed to rt over 2 h. EtOAc (100 mL) and H<sub>2</sub>O (50 mL) were added and the layers were separated. The aqueous layer was extracted with EtOAc (2 x 50 mL). The combined organic layers were washed with brine (100 mL), dried over MgSO<sub>4</sub>, filtered, and concentrated *in vacuo*. Flash chromatography eluting with 4:1 CH<sub>2</sub>Cl<sub>2</sub>-EtOAc gave the *title compound* **S35** (1.97 g, 5.53 mmol, 70%) as a colourless solid. **Mp**: 159– 162 °C. **<sup>1</sup>H NMR** (500 MHz, CDCl<sub>3</sub>): 7.26-7.04 (5H, m, Bn Ar-H), 5.74 (1H, dd, *J* 9.7, 4.6, 8-H), 5.56 (1H, d, *J* 9.7, 9-H), 4.34 (1H, app. s, 10-H), 3.78 (1H, d, *J* 19.3, CH<sub>A</sub>H<sub>B</sub>Ph), 3.69-3.57 (2H, m, CH<sub>A</sub>H<sub>B</sub>Ph and 4-H<sub>A</sub>), 3.50-3.41 (1H, m, 2-H<sub>A</sub>), 3.33 (1H, d, *J* 11.8, 2-H<sub>B</sub>), 3.28-3.16 (2H, m, 4-H<sub>B</sub> and 7-H), 3.09-2.96 (1H, m, 5-H), 1.89 (1H, app. t, *J* 10.0, 6-H<sub>A</sub>), 1.62-1.48 (1H, m, 6-H<sub>B</sub>), 1.36 (9H, s, C<sub>q</sub>(CH<sub>3</sub>)<sub>3</sub>). **<sup>13</sup>C NMR** (100 MHz, CDCl<sub>3</sub>, mixture of two rotamers): 154.7 (N(CO)O), 154.6 (N(CO)O), 140.3 (2 peaks, Ar-C<sub>q</sub>), 133.3 (8-C), 132.8 (8-C), 128.4 (Ar-C), 128.3 (Ar-C), 128.2 (Ar-C), 127.7 (9-C), 127.4 (9-C), 127.0 (Ar-C), 79.4 (C<sub>q</sub>(CH<sub>3</sub>)<sub>3</sub>), 75.4 (1-C), 74.5 (1-C), 67.0 (10-C), 66.8 (10-C), 58.4 (7-C), 58.2 (7-C), 54.5 (4-C), 54.1 (4-C), 49.8 (2-C), 48.7 (2-C), 40.4 (5-C), 39.6 (5-C), 38.5 (6-C), 38.2 (6-C), 28.7 (C<sub>q</sub>(CH<sub>3</sub>)<sub>3</sub>) [28 of 34 expected peaks observed]. **IR**  $\nu_{\text{max}}$ (film)/cm<sup>-1</sup> 3400, 2973, 1693, 1669, 1417, 1171. **HRMS** (ESI): C<sub>21</sub>H<sub>29</sub>N<sub>2</sub>O<sub>3</sub> [MH]<sup>+</sup>; calculated 357.2173, found 357.2169.

### 5.4.3 Preparation of fragments

Note that the following fragments from the manuscript are detailed here using the aliases given below in parentheses:

- Compound **12** (**F12**)
- Compound **21** (**F8**)
- Compound **22** (**F31**)
- Compound **23** (**F48**)
- Compound **24** (**CF1**)
- Compound **25** (**F32**)

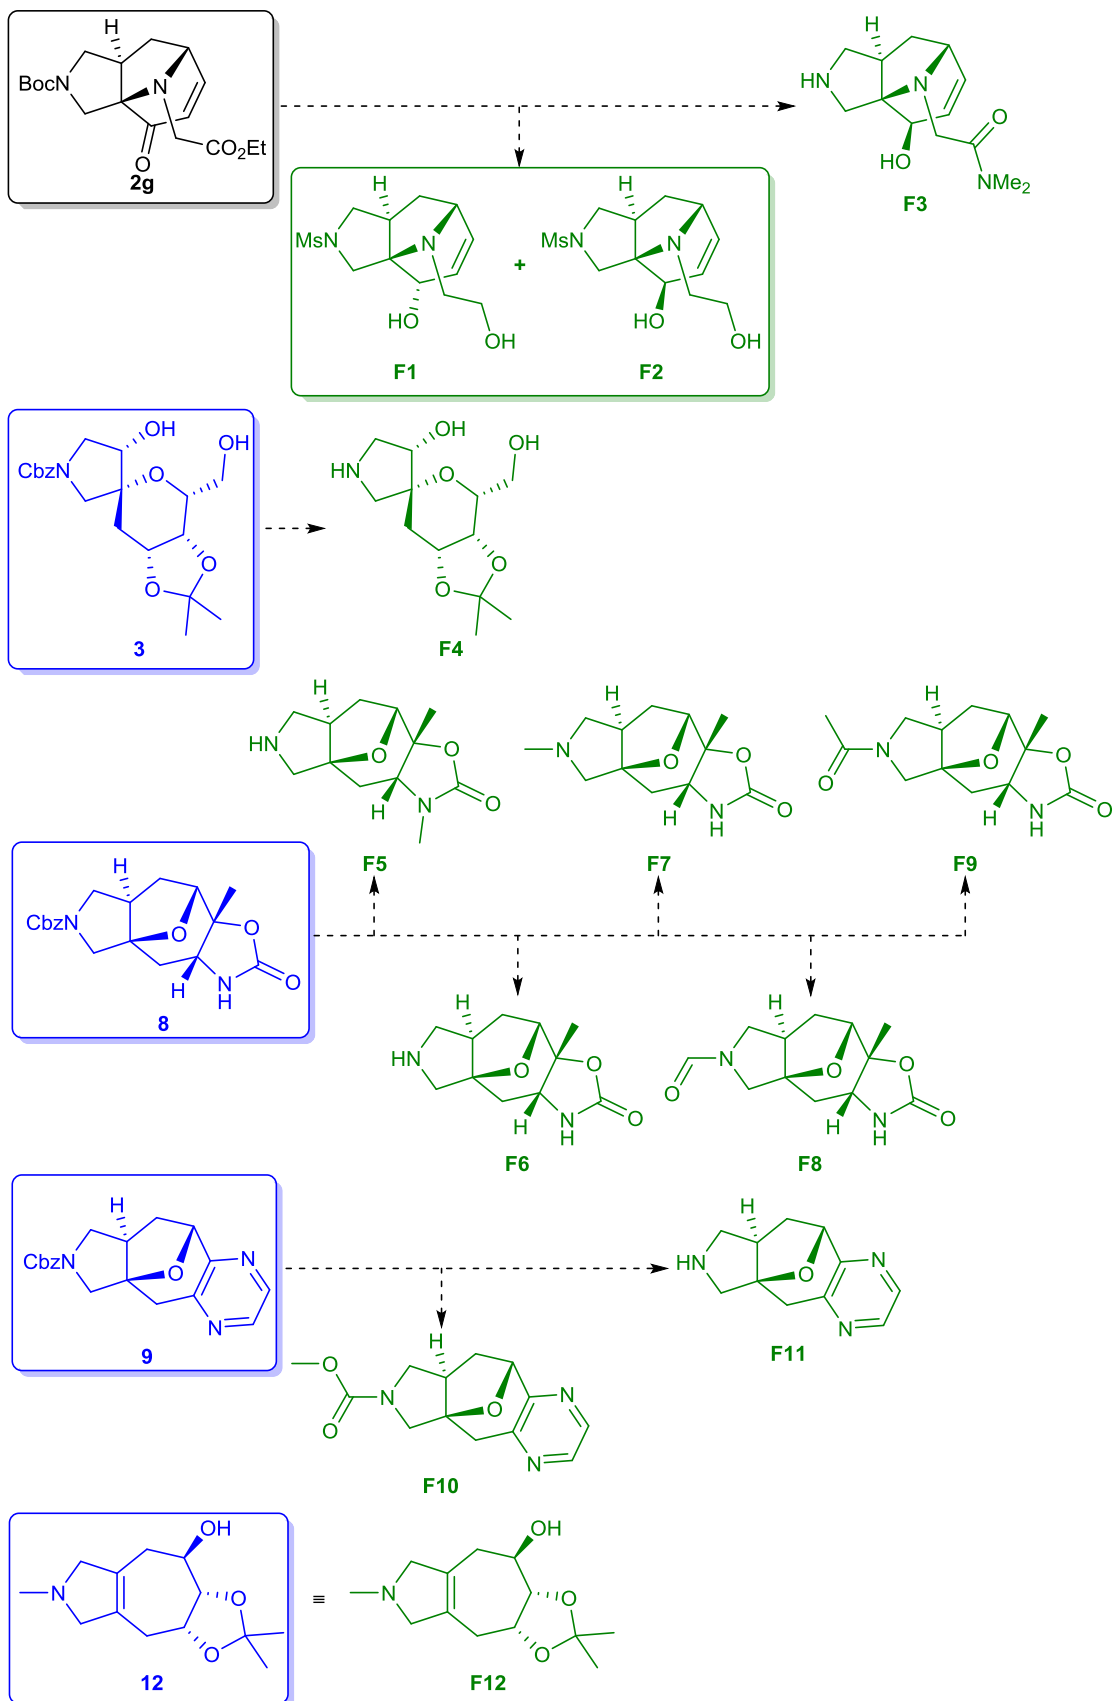



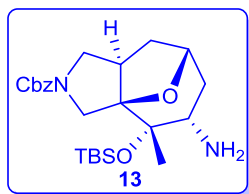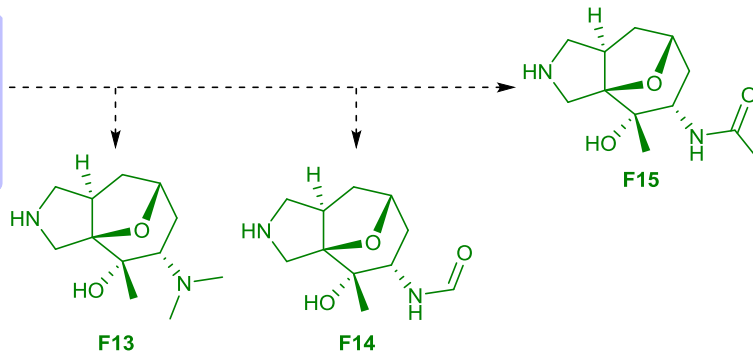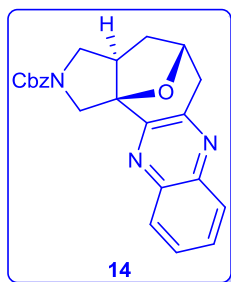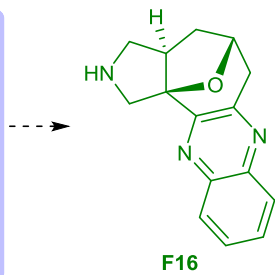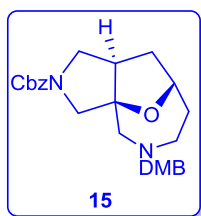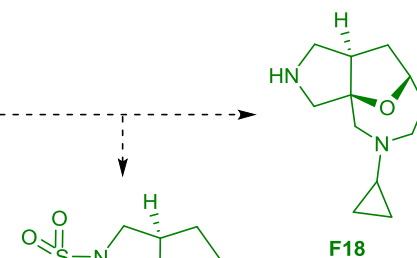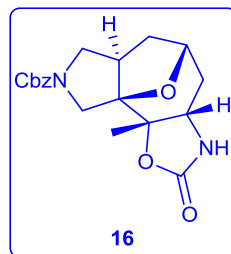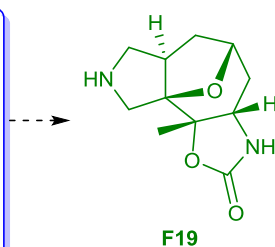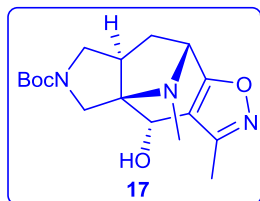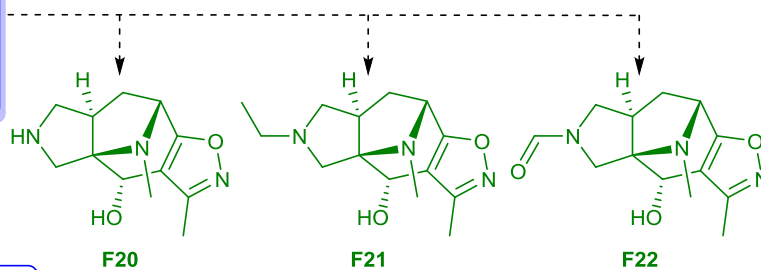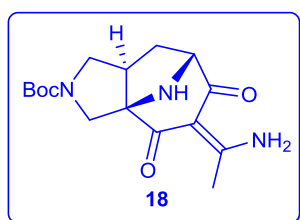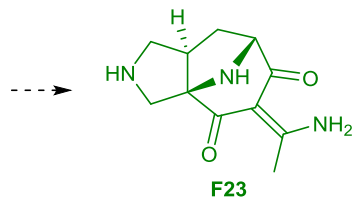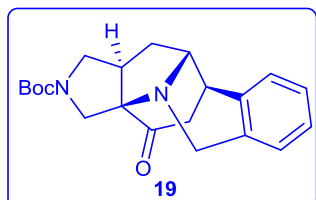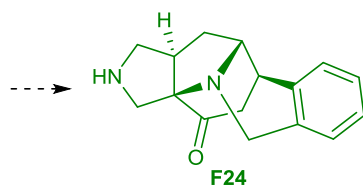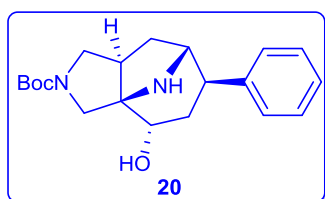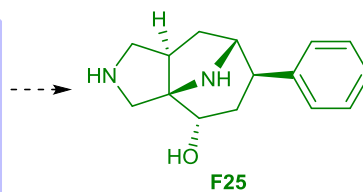

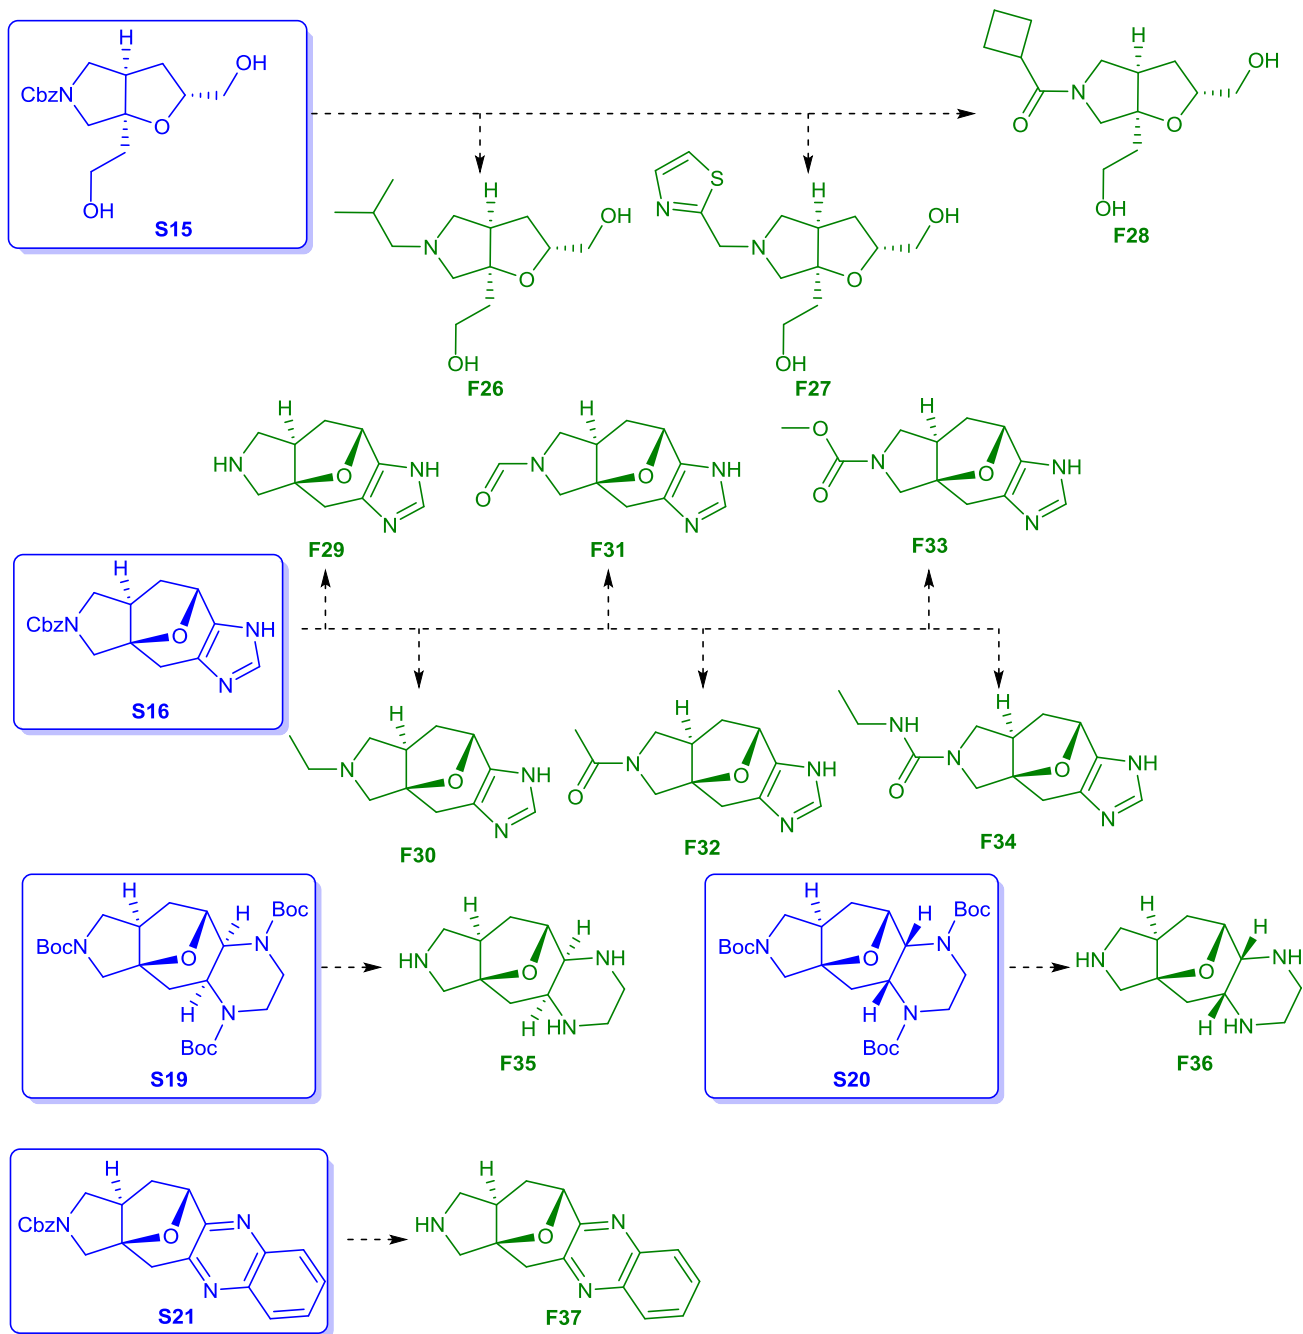

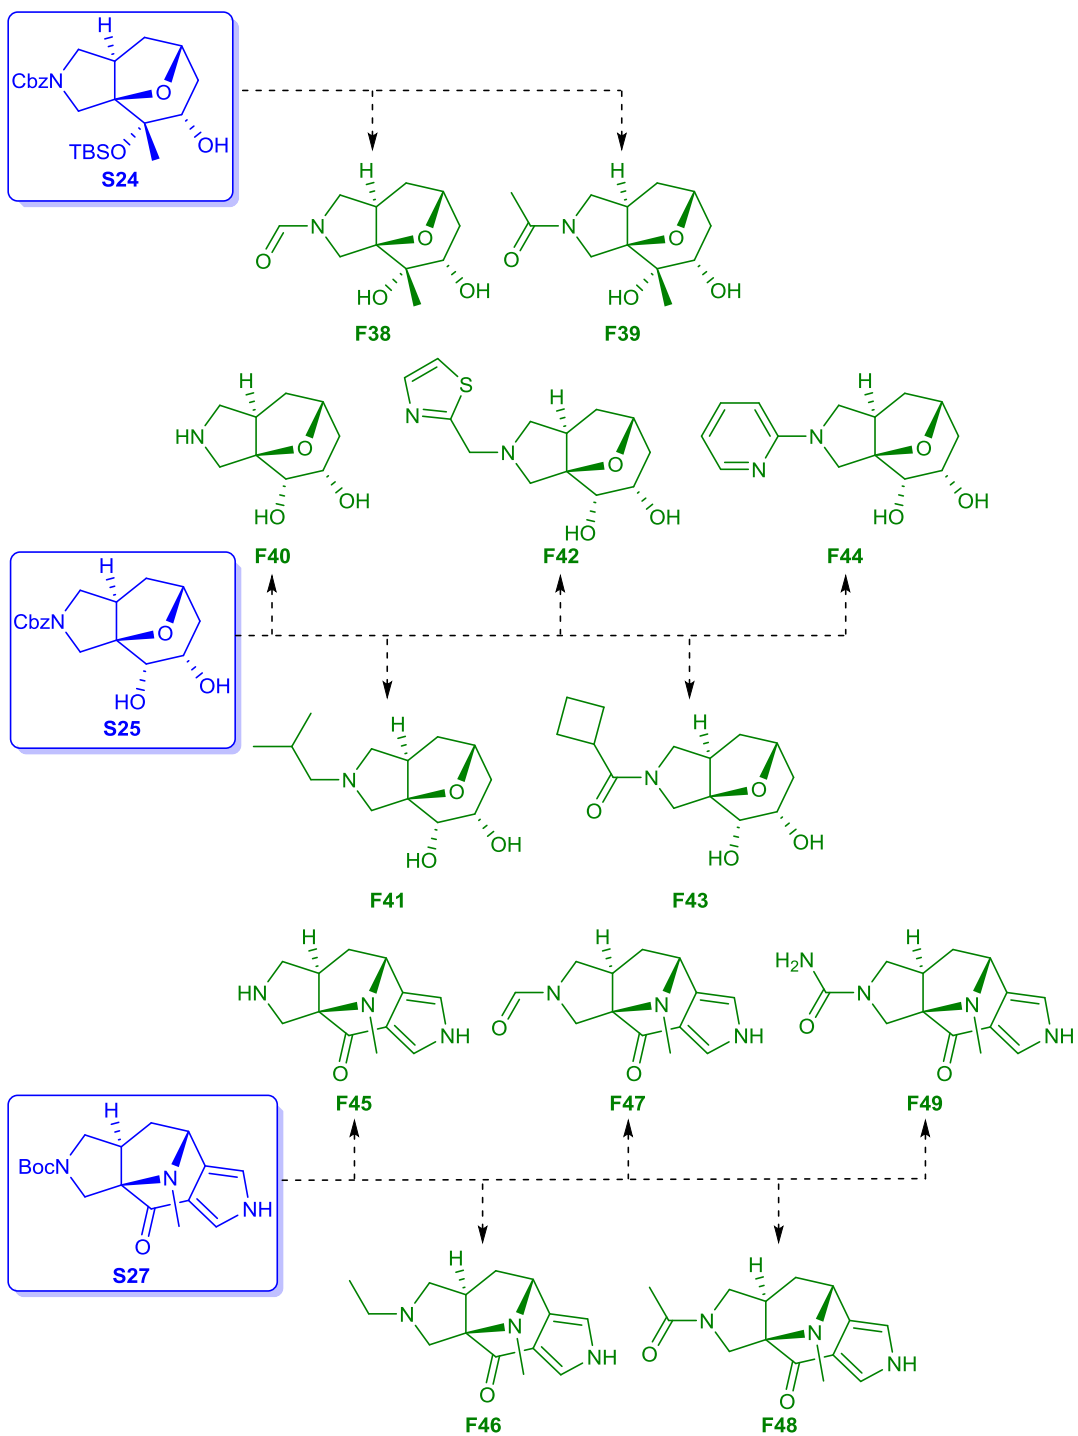

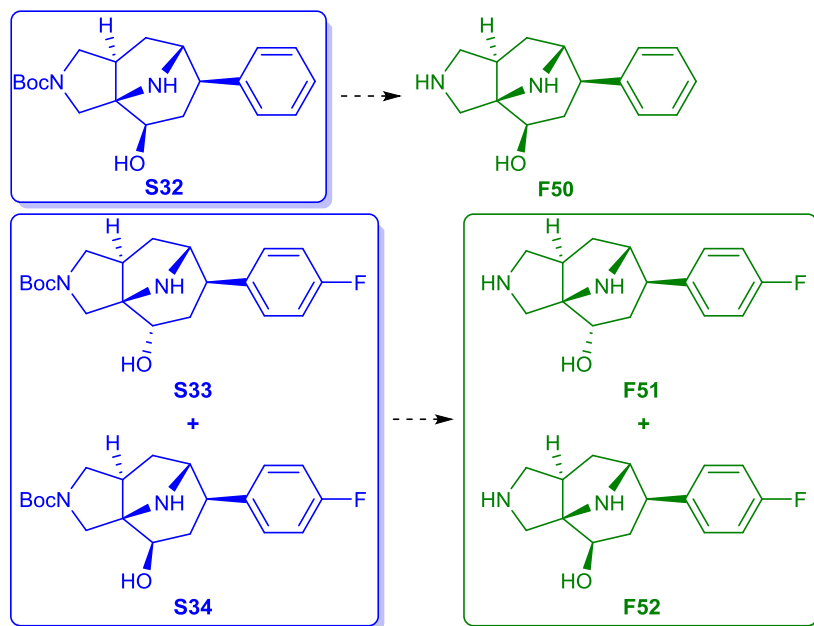

### 5.4.3.1 Preparation of fragments derived from cycloadduct **2g**

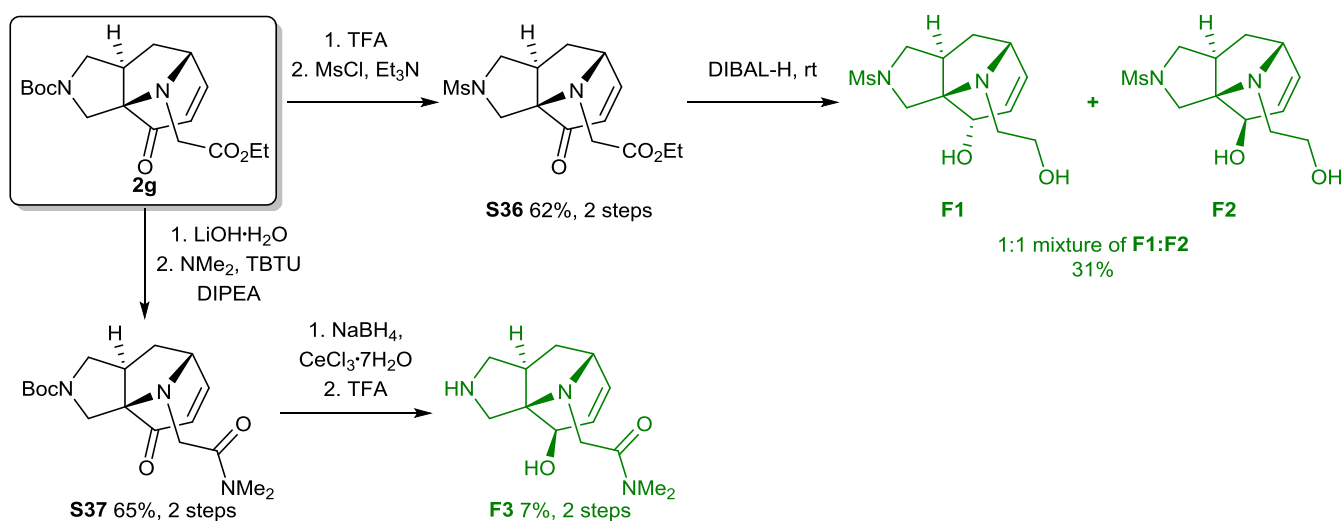

### Ethyl 2-[(1*R*\*,5*R*\*,7*R*\*)-3-methanesulfonyl-10-oxo-3,11-diazatricyclo[5.3.1.0<sup>1,5</sup>]undec-8-en-11-yl]acetate **S36**

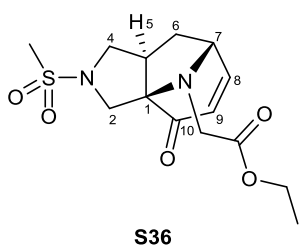

Deprotection of the Boc-protected cycloadduct **2g** (119 mg, 0.74 mmol) was carried out by following general procedure I. The reaction mixture was concentrated *in vacuo* and the crude residue was used directly in the next step. MsCl (0.11 mL, 1.47 mmol, 3.20 eq.) was added to a stirred solution of the residue and Et<sub>3</sub>N (0.61 mL, 9.7 eq.). The resulting solution was stirred at

rt for 2 h. H<sub>2</sub>O (10 mL) and CH<sub>2</sub>Cl<sub>2</sub> (10 mL) were added and the phases separated. The aqueous phase was extracted with CH<sub>2</sub>Cl<sub>2</sub> (2 x 10 mL) and the combined organic layers were dried over MgSO<sub>4</sub>, filtered and evaporated *in vacuo* to give a crude brown oil. Flash chromatography eluting with 3:2 CH<sub>2</sub>Cl<sub>2</sub>–EtOAc gave the *title compound* **S36** (150 mg, 0.46 mmol, 62% over two steps). **<sup>1</sup>H NMR** (500 MHz, MeOD-*d*<sub>4</sub>, 333 K): δ 7.01 (1H, dd, *J* 9.8, 4.7, 8-H), 5.96 (1H, d, *J* 9.8, 9-H), 4.17 (1H, app. t, *J* 5.4, 7-H), 4.07 (2H, q, *J* 7.1, CO<sub>2</sub>CH<sub>2</sub>CH<sub>3</sub>), 4.02 (1H, d, *J* 11.8, 2-H<sub>A</sub>), 3.77 (1H, dd, *J* 10.2, 8.6, 4-H<sub>B</sub>), 3.31 (1H, d, *J* 16.6, NCH<sub>A</sub>H<sub>B</sub>CO<sub>2</sub>Et), 3.27 (1H, dd, *J* 10.2, 8.5, 4-H<sub>A</sub>), 3.22 (1H, d, *J* 16.6, NCH<sub>A</sub>H<sub>B</sub>CO<sub>2</sub>Et), 3.12 (1H, *J* 11.8, 2-H<sub>B</sub>), 2.81 (3H, s, NSO<sub>2</sub>CH<sub>3</sub>), 2.61 (1H, app. qd, *J* 8.5, 5.0, 5-H), 2.01 (1H, dd, *J* 12.3, 5.3, 6-H<sub>A</sub>), 1.95 (1H, dd, *J* 12.3, 8.5, 6-H<sub>B</sub>), 1.15 (3H, t, *J* 7.1, CO<sub>2</sub>CH<sub>2</sub>CH<sub>3</sub>). **<sup>13</sup>C NMR** (125 MHz, MeOD-*d*<sub>4</sub>, 333 K): δ 195.9, 172.2, 152.2, 127.8, 83.2, 63.0, 62.1, 55.5, 49.8, 48.4, 46.9, 35.3, 34.1, 14.4. **IR** *v*<sub>max</sub>(film)/cm<sup>-1</sup> 1737, 1677, 1329, 1150, 1022. **HRMS** (ESI): C<sub>14</sub>H<sub>21</sub>N<sub>2</sub>O<sub>5</sub>S [M+H]<sup>+</sup>; calculated 329.1171, found 329.1166.

**(1*R*\*,5*R*\*,7*R*\*,10*S*\*)-11-(2-Hydroxyethyl)-3-methanesulfonyl-3,11-diazatricyclo[5.3.1.0<sup>1,5</sup>]undec-8-en-10-ol F1 and (1*R*\*,5*R*\*,7*R*\*,10*R*\*)-11-(2-Hydroxyethyl)-3-methanesulfonyl-3,11-diazatricyclo[5.3.1.0<sup>1,5</sup>]undec-8-en-10-ol F2**

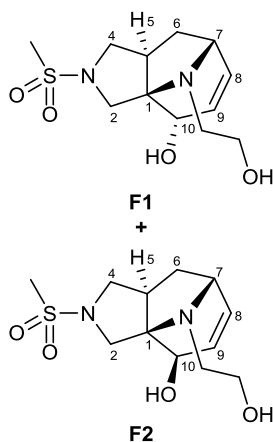

To a solution of compound **S36** (150 mg, 0.46 mmol, 1.00 eq.) in THF (2.5 mL) at rt was added DIBAL (1.0 M in hexanes, 2.29 mL, 2.29 mmol, 5.00 eq.). The resulting solution was stirred for 2 h and then Rochelle's salt (sat. aq. solution, 10 mL) and CH<sub>2</sub>Cl<sub>2</sub> (10 mL) were added. The resulting biphasic solution was stirred rapidly for 2 h before the layers were separated. The aqueous phase was extracted with CH<sub>2</sub>Cl<sub>2</sub> (2 x 10 mL) and the combined organic phases were washed with brine (10 mL), dried over MgSO<sub>4</sub>, filtered and evaporated *in vacuo* to give a crude colourless oil. Flash chromatography eluting with 16:1:0.1 CH<sub>2</sub>Cl<sub>2</sub>-EtOH-NH<sub>4</sub>OH gave the *title compounds* **F1** and **F2** (41 mg,

0.14 mmol, 31%) as a 1:1 mixture of diastereomers. <sup>1</sup>H NMR (500 MHz, MeOD-d<sub>4</sub>, 333 K, 2 x OH not observed): δ 5.96 (0.45H, ddd, *J* 9.8, 5.0, 1.3, 8-H<sub>min</sub>), 5.85 (0.55H, ddd, *J* 9.8, 4.4, 1.6, 8-H<sub>maj</sub>), 5.79 (0.45H, dd, *J* 9.8, 4.0, 9-H<sub>min</sub>), 5.60 (0.55H, dd, 9.8, 2.2, 9-H<sub>maj</sub>), 4.34 (0.55H, app. s, 10-H<sub>maj</sub>), 3.82 (0.45H, app. t, *J* 5.5, 7-H<sub>min</sub>), 3.71-3.47 (4.9H, m, 4-H<sub>B-maj</sub>, 4-H<sub>B-min</sub>, 7-H<sub>maj</sub>, 10-H<sub>min</sub>, NCH<sub>2</sub>CH<sub>2</sub>OH<sub>min</sub>, NCH<sub>2</sub>CH<sub>2</sub>OH<sub>min</sub> and NCH<sub>2</sub>CH<sub>2</sub>OH<sub>maj</sub>), 3.39 (0.55H, d, *J* 11.0, NCH<sub>A</sub>H<sub>B</sub>CH<sub>2</sub>OH<sub>maj</sub>), 3.35 (0.55H, d, *J* 11.0, NCH<sub>A</sub>H<sub>B</sub>CH<sub>2</sub>OH<sub>maj</sub>), 3.23 (0.55H, dd, *J* 10.0, 6.8, 4-H<sub>A-maj</sub>), 3.20 (0.45H, dd, *J* 9.8, 7.3, 4-H<sub>A-min</sub>), 3.18-3.11 (0.55, m, 5-H<sub>maj</sub>), 2.95-2.84 (1.45H, m, 2-H<sub>A-maj</sub>, 2-H<sub>min</sub>), 2.91 (1.35H, s, NSO<sub>2</sub>CH<sub>3</sub>(min)), 2.90 (1.65H, s, NSO<sub>2</sub>CH<sub>3</sub>(maj)), 2.79 (0.55H, ddd, *J* 13.3, 7.9, 6.0, 2-H<sub>B-maj</sub>), 2.41-2.29 (0.45H, m, 5-H<sub>min</sub>), 2.01 (0.55H, dd, *J* 11.6, 8.7, 6-H<sub>A-maj</sub>), 1.91 (0.45H, dd, *J* 11.7, 8.6, 6-H<sub>A-min</sub>), 1.78-1.68 (1H, m, 6-H<sub>B-maj</sub> and 6-H<sub>B-min</sub>). <sup>13</sup>C NMR (125 MHz, MeOD-d<sub>4</sub>, 333 K, one C not observed): δ 133.5, 132.8, 129.5, 127.6, 77.1, 76.3, 70.2, 66.8, 62.1, 62.0, 60.7, 60.6, 56.3, 56.0, 54.4, 52.9, 48.0, 46.6, 41.9, 38.8, 38.2, 35.0, 34.8 [23 of 24 expected peaks observed]. IR ν<sub>max</sub>(film)/cm<sup>-1</sup> 3330, 1643, 1409, 1013. HRMS (ESI): C<sub>12</sub>H<sub>21</sub>N<sub>2</sub>O<sub>4</sub>S [M+H]<sup>+</sup>; calculated 289.1222, found 289.1229.

***tert*-Butyl (1*R*\*,5*R*\*,7*R*\*)-11-[(dimethylcarbamoyl)methyl]-10-oxo-3,11-diazatricyclo[5.3.1.0<sup>1,5</sup>]undec-8-ene-3-carboxylate S37**

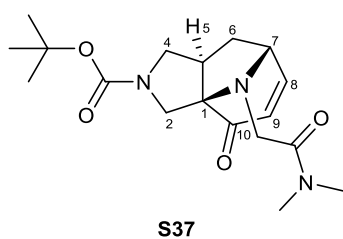

To a stirred solution of cycloadduct **2g** (124 mg, 0.35 mmol, 1.00 eq.) in 1:1 THF-H<sub>2</sub>O (2.0 mL) at rt was added LiOH·H<sub>2</sub>O (74 mg, 1.77 mmol, 5.00 eq.). The resulting suspension was stirred at rt for 3 days. CH<sub>2</sub>Cl<sub>2</sub> (10 mL) and H<sub>2</sub>O (10 mL) was added and the phases separated. The aqueous phase was acidified to pH 3 and then extracted with 9:1 CH<sub>2</sub>Cl<sub>2</sub>-

MeOH (3 x 10 mL). The combined organic layers were dried over MgSO<sub>4</sub>, filtered, and concentrated *in vacuo* to give the crude carboxylic acid as a clear, colourless oil. This crude material was carried forward to the next reaction without further purification {<sup>1</sup>H NMR (500 MHz, MeOD-d<sub>4</sub>, 333 K, CO<sub>2</sub>H not observed): δ 7.01 (1H, dd, *J* 9.8, 4.8, 8-H), 5.94 (1H, d, *J* 9.8, 9-H), 4.14 (1H, m, 7-H), 4.00 (1H, d, *J* 12.5, 2-H<sub>A</sub>), 3.82 (1H, dd, *J* 10.9, 9.3, 4-H<sub>B</sub>), 3.30 (1H, dd, *J* 10.9, 8.1, 4-H<sub>A</sub>), 3.28 (1H, d, *J* 16.9, NCH<sub>A</sub>H<sub>B</sub>CO<sub>2</sub>H), 3.17 (1H, d, *J* 12.5, 2-H<sub>B</sub>), 3.17 (1H, d, *J* 16.9, NCH<sub>A</sub>H<sub>B</sub>CO<sub>2</sub>H), 2.52 (1H, app. qd, *J* 8.6, 4.7, 5-H), 2.01 (1H, ddd, *J* 12.3, 6.1, 4.8, 6-H<sub>B</sub>), 1.95 (1H, dd, *J* 12.3, 8.6, 6-H<sub>A</sub>), 1.36 (9H, s, C<sub>q</sub>(CH<sub>3</sub>)<sub>3</sub>). **LRMS** (HP-LCMS): C<sub>16</sub>H<sub>23</sub>N<sub>2</sub>O<sub>5</sub> [M+H]<sup>+</sup>; found 323.1}. To the crude residue in CH<sub>2</sub>Cl<sub>2</sub> (2.0 mL) was added NHMe<sub>2</sub> (2.0 M in THF, 0.21 mL, 0.43 mmol, 1.20 eq.), TBTU (136 mg, 0.43 mmol, 1.20 eq.) and DIPEA (92 μL, 0.53 mmol, 1.50 eq.). The resulting solution was stirred at rt for 3 h. H<sub>2</sub>O (5 mL) and CH<sub>2</sub>Cl<sub>2</sub> (5 mL) were added and the phases separated. The aqueous phase was extracted with CH<sub>2</sub>Cl<sub>2</sub> (2 x 5 mL) and the combined organic layers were dried over MgSO<sub>4</sub>, filtered, and concentrated *in vacuo* to give a crude oil. Flash chromatography eluting with 80:10:1 CH<sub>2</sub>Cl<sub>2</sub>–EtOH–NH<sub>4</sub>OH gave the *title compound* **S37** (80 mg, 0.23 mmol, 65%) as a yellow oil. <sup>1</sup>H NMR (500 MHz, MeOD-d<sub>4</sub>, 333 K): δ 7.11 (1H, dd, *J* 9.8, 4.8, 8-H), 6.06 (1H, d, *J* 9.8, 9-H), 4.14 (1H, app. td, *J* 4.9, 1.9, 7-H), 4.09 (1H, d, *J* 12.8, 2-H<sub>A</sub>), 3.93 (1H, dd, *J* 10.7, 9.4, 4-H<sub>B</sub>), 3.53 (1H, d, *J* 14.2, NCH<sub>A</sub>H<sub>B</sub>CO<sub>2</sub>(NCH<sub>3</sub>)<sub>2</sub>), 3.41–3.36 (1H, m, 4-H<sub>A</sub>), 3.40 (1H, d, *J* 12.8, 2-H<sub>B</sub>), 3.36 (1H, d, *J* 14.2, NCH<sub>A</sub>H<sub>B</sub>CO<sub>2</sub>(NCH<sub>3</sub>)<sub>2</sub>), 3.06 (3H, s, NCH<sub>3</sub>), 2.94 (3H, s, NCH<sub>3</sub>), 2.70–2.60 (1H, m, 5-H), 2.14–2.03 (2H, m, 6-H), 1.48 (9H, s, C<sub>q</sub>(CH<sub>3</sub>)<sub>3</sub>). <sup>13</sup>C NMR (125 MHz, MeOD-d<sub>4</sub>, 333 K): δ 195.1, 170.5, 154.6, 150.8, 126.2, 88.0, 79.8, 60.8, 52.9, 45.7, 44.1, 36.1, 34.7, 34.0, 27.4. **IR**  $\nu_{\text{max}}$ (film)/cm<sup>-1</sup> 1635, 1633, 1409, 1166, 1129. **HRMS** (ESI): C<sub>18</sub>H<sub>27</sub>N<sub>3</sub>NaO<sub>4</sub> [M+Na]<sup>+</sup>; calculated 372.1894, found 372.1898.

### 2-[(1*R*\*,5*R*\*,7*R*\*,10*R*\*)-10-Hydroxy-3,11-diazatricyclo[5.3.1.0<sup>1,5</sup>]undec-8-en-11-yl]-*N,N*-dimethylacetamide **F3**

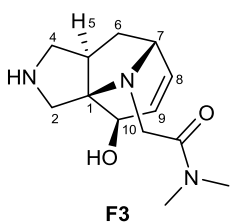

To a solution of compound **S37** (136 mg, 0.39 mmol, 1.00 eq) in MeOH (2.0 mL) at –78°C was added CeCl<sub>3</sub>·7H<sub>2</sub>O (174 mg, 0.47 mmol, 1.20 eq.) followed by NaBH<sub>4</sub> (18 mg, 0.47 mmol, 1.20 eq.). The resulting solution was stirred for 2 h, then H<sub>2</sub>O (10 mL) and CH<sub>2</sub>Cl<sub>2</sub> (10 mL) were added. The layers were separated and the aqueous phase was extracted with CH<sub>2</sub>Cl<sub>2</sub> (2 x 10 mL). The combined organic phases were dried over MgSO<sub>4</sub>, filtered, and concentrated *in vacuo*. The crude residue was purified by SCX SPE eluting with MeOH, then sat. NH<sub>3</sub>/MeOH to give the crude Boc-protected aminoalcohol. The resulting Boc-protected amine was then deprotected by following general procedure I. Purification by SCX SPE eluting with MeOH, then sat. NH<sub>3</sub>/MeOH, gave the *title compound* **F3** (13 mg, 52 μmol, 13%) as a brown oil. <sup>1</sup>H NMR (500 MHz, MeOD-d<sub>4</sub>, 333 K): δ 5.70

(1H, dd,  $J$  9.7, 4.2, 8-H), 5.54 (1H, d,  $J$  9.7, 9-H), 4.30 (1H, app. s, 10-H), 3.47-3.37 (3H, m, 7-H and  $\text{CH}_2\text{CO}_2(\text{NCH}_3)_2$ ), 2.97 (3H, s,  $\text{NCH}_3$ ), 2.90-2.79 (5H, m, 4- $\text{H}_\text{B}$ , 5-H and  $\text{NCH}_3$ ), 2.73-2.69 (1H, m, 4- $\text{H}_\text{A}$ ), 2.69 (1H, d,  $J$  12.4, 2- $\text{H}_\text{A}$ ), 2.63 (1H, d,  $J$  12.4, 2- $\text{H}_\text{B}$ ), 1.93 (1H, dd,  $J$  11.4, 8.7, 6- $\text{H}_\text{A}$ ), 1.60 (1H, app. dt,  $J$  11.4, 5.8, 6- $\text{H}_\text{B}$ ).  $^{13}\text{C}$  NMR (125 MHz,  $\text{MeOD-d}_4$ , 333 K):  $\delta$  173.2, 131.9, 130.1, 78.1, 66.3, 61.3, 55.0, 50.4, 47.9, 43.0, 39.6, 37.0, 36.0. IR  $\nu_{\text{max}}(\text{film})/\text{cm}^{-1}$  13373, 1628, 1407, 1140. HRMS (ESI):  $\text{C}_{13}\text{H}_{22}\text{N}_3\text{O}_2$   $[\text{M}+\text{Na}]^+$ ; calculated 252.1712, found 252.1718.

### 5.4.3.2 Preparation of fragments derived from scaffold 3

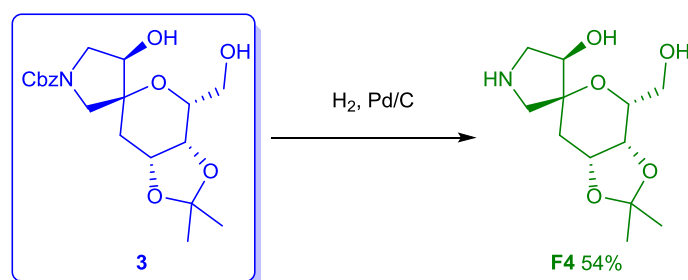

#### (3a*R*\*,4*R*\*,4'*S*\*,6*R*\*,7a*R*\*)-4-(hydroxymethyl)-2,2-dimethyl-tetrahydro-2H-spiro[[1,3]dioxolo[4,5-*c*]pyran-6,3'-pyrrolidine]-4'-ol **F4**

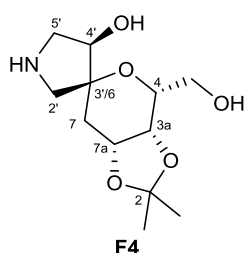

Hydrogenation was carried out following general procedure **B**, using compound **3** (87 mg, 0.22 mmol) and Pd/C (10 mg, 10% w/w) in MeOH (10 mL) over 15 h. Filtration followed by concentration gave a colourless oil, which was triturated with pentane, then EtOAc, to give the *title compound* **F4** (31 mg, 0.12 mmol, 54%) as a colourless amorphous solid.  $^1\text{H}$  NMR (500 MHz,  $\text{MeOD-d}_4$ , 333 K, NH and one OH not observed):  $\delta$  4.50-4.47 (1H, m, 7a-H), 4.15 (1H, dd,  $J$  6.8, 1.7, 3a-H), 3.92 (1H, dd,  $J$  6.2, 5.3, 4'-H), 3.81-3.67 (3H, m, includes: 1H, 4-H; and 2H,  $\text{CH}_2\text{OH}$ ), 3.08 (1H, d,  $J$  12.0, 2'- $\text{H}_\text{A}$ ), 3.04 (1H, dd,  $J$  11.5, 6.2, 5'- $\text{H}_\text{A}$ ), 2.84 (1H, dd,  $J$  11.5, 5.3, 5'- $\text{H}_\text{B}$ ), 2.68 (1H, d,  $J$  12.0, 2'- $\text{H}_\text{B}$ ), 1.95 (1H, dd,  $J$  14.9, 5.9, 7- $\text{H}_\text{A}$ ), 1.89-1.82 (2H, m, 7- $\text{H}_\text{B}$  and OH), 1.48 (3H, s,  $(\text{CH}_3)_\text{A}$ ), 1.32 (3H, s,  $(\text{CH}_3)_\text{B}$ ).  $^{13}\text{C}$  NMR (125 MHz,  $\text{MeOD-d}_4$ , 333 K):  $\delta$  110.0 (2-C), 81.5 (4-C), 79.0 (3'-C/6-C), 73.8 (4'-C), 73.5 (3a-C), 72.4 (7a-C), 63.0 ( $\text{CH}_2\text{OH}$ ), 54.4 (2'-C), 52.6 (5'-C), 32.7 (7-C), 27.0 ( $(\text{CH}_3)_\text{A}$ ), 25.2 ( $(\text{CH}_3)_\text{B}$ ). IR  $\nu_{\text{max}}(\text{film})/\text{cm}^{-1}$  3312 (br., OH), 2983, 2933, 2876, 1543, 1417, 1382, 1216. HRMS (ESI):  $\text{C}_{12}\text{H}_{22}\text{NO}_5$   $[\text{M}+\text{H}]^+$ ; calculated 260.1498, found 260.1491.



### 5.4.3.3 Preparation of fragments derived from scaffold 7

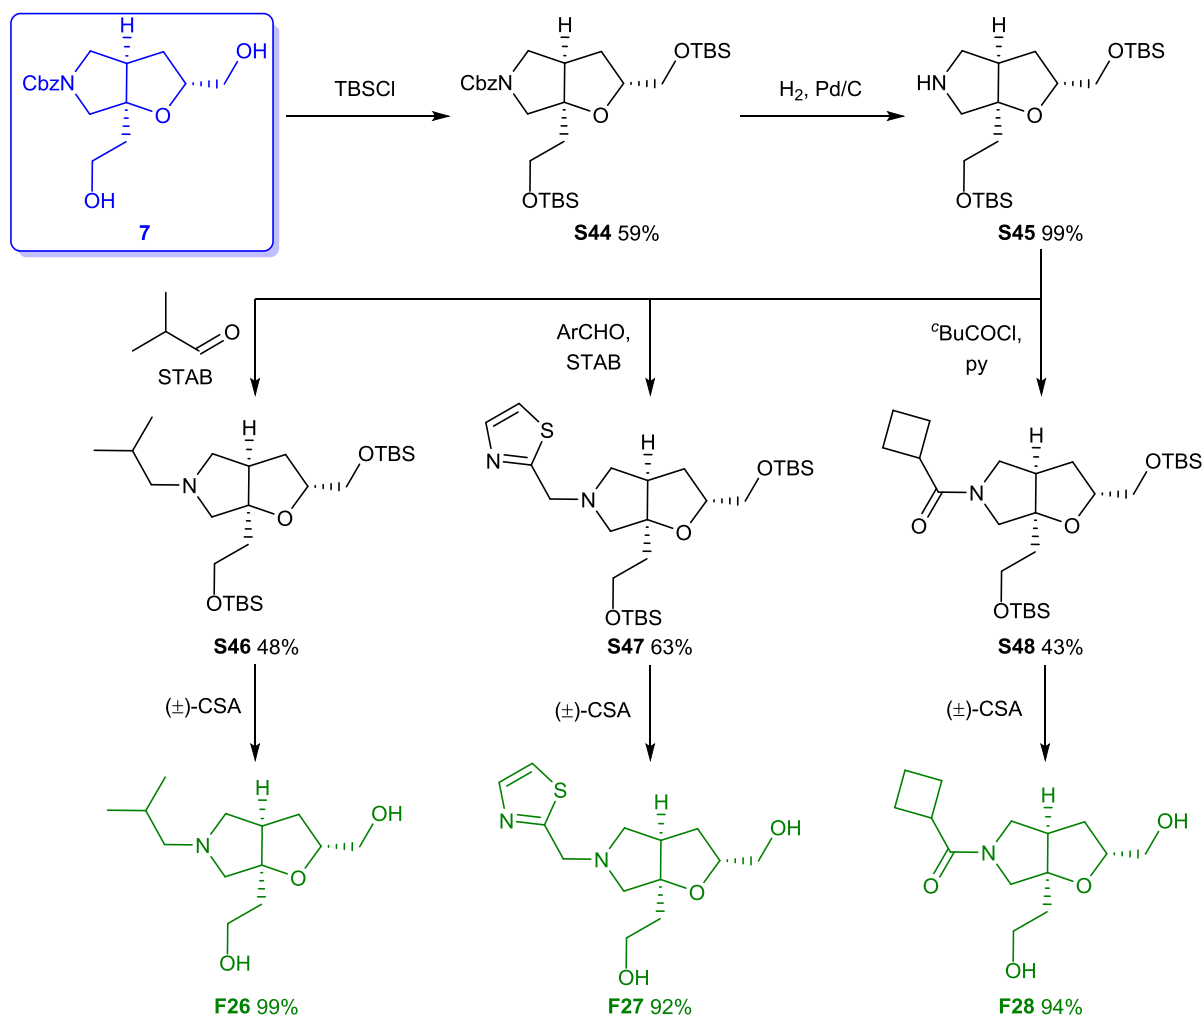

### Benzyl (2*R*\*,3*aR*\*,6*aR*\*)-6*a*-{2-[(*tert*-butyldimethylsilyl)oxy]ethyl}-2-[[(*tert*-butyldimethylsilyl)oxy]methyl]-hexahydro-2*H*-furo[2,3-*c*]pyrrole-5-carboxylate S44

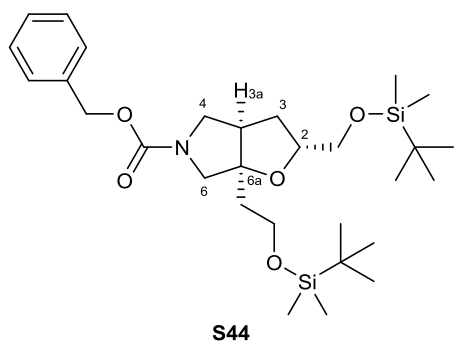

TBSCl (1.03 g, 6.85 mmol, 2.2 eq.) and imidazole (548 mg, 8.10 mmol, 2.6 eq.) were added to a stirred solution of diol **7** (1.0 g, 3.1 mmol, 1.0 eq.) in CH<sub>2</sub>Cl<sub>2</sub>. The reaction mixture was stirred for 24 h, then partitioned with sat. aq. NH<sub>4</sub>Cl (20 mL). The phases were separated and the aqueous layer was washed with CH<sub>2</sub>Cl<sub>2</sub> (2 × 10 mL). The combined organic phases were washed with brine (20 mL), then dried over Na<sub>2</sub>SO<sub>4</sub> and concentrated *in vacuo*. Flash chromatography eluting with 9:1 pentane–EtOAc gave the *title compound* **S44** (1.01 g, 1.84 mmol, 59%) as a colourless oil. *R*<sub>f</sub> 0.40 (9:1 pentane–EtOAc). <sup>1</sup>H NMR (500 MHz, CDCl<sub>3</sub>, mixture of rotamers): δ 7.39–7.27 (5H, m, Cbz Ar-H), 5.16–5.05 (2H, m, OCH<sub>2</sub>Ph), 4.29–4.11 (1H, m, 2-H), 3.81–3.66 (4H, m, 4-H<sub>A</sub>, 6-H<sub>A</sub> and C<sub>q</sub>CH<sub>2</sub>CH<sub>2</sub>OTBS), 3.66–3.57 (2H, m, CHCH<sub>2</sub>OTBS),

Flash chromatography eluting with 9:1 pentane–EtOAc gave the *title compound* **S44** (1.01 g, 1.84 mmol, 59%) as a colourless oil. *R*<sub>f</sub> 0.40 (9:1 pentane–EtOAc). <sup>1</sup>H NMR (500 MHz, CDCl<sub>3</sub>, mixture of rotamers): δ 7.39–7.27 (5H, m, Cbz Ar-H), 5.16–5.05 (2H, m, OCH<sub>2</sub>Ph), 4.29–4.11 (1H, m, 2-H), 3.81–3.66 (4H, m, 4-H<sub>A</sub>, 6-H<sub>A</sub> and C<sub>q</sub>CH<sub>2</sub>CH<sub>2</sub>OTBS), 3.66–3.57 (2H, m, CHCH<sub>2</sub>OTBS),

3.51-3.41 (1H, m, 6-H<sub>B</sub>), 3.36-3.19 (1H, m, 4-H<sub>B</sub>), 2.76-2.59 (1H, m, 3a-H), 2.10-1.93 (1H, m, 3-H<sub>A</sub>), 1.89-1.72 (3H, m, 3-H<sub>B</sub> and C<sub>q</sub>CH<sub>2</sub>CH<sub>2</sub>OTBS), 0.89 (12H, s, SiC<sub>q</sub>(CH<sub>3</sub>)<sub>3</sub>), 0.85 (6H, s, SiC<sub>q</sub>(CH<sub>3</sub>)<sub>3</sub>), 0.05 (3H, s, SiCH<sub>3</sub>), 0.05 (4H, s, SiCH<sub>3</sub>), 0.03 (5H, s, SiCH<sub>3</sub>). **<sup>13</sup>C NMR** (125 MHz, CDCl<sub>3</sub>, mixture of two rotamers, one Ar-C not observed): δ 154.9 (N(CO)O), 154.7 (N(CO)O), 137.0 (Ar-C<sub>q</sub>), 128.6 (Ar-C), 128.0 (Ar-C), 91.5 (6a-C), 90.6 (6a-C), 79.6 (2-C), 79.5 (2-C), 66.9 (OCH<sub>2</sub>Ph), 65.6 (CHCH<sub>2</sub>OTBS), 65.4 (CHCH<sub>2</sub>OTBS), 59.5 (C<sub>q</sub>CH<sub>2</sub>CH<sub>2</sub>OTBS), 59.4 (C<sub>q</sub>CH<sub>2</sub>CH<sub>2</sub>OTBS), 57.1 (6-C), 56.9 (6-C), 51.2 (4-C), 51.0 (4-C), 47.2 (3a-C), 46.6 (3a-C), 40.9 (C<sub>q</sub>CH<sub>2</sub>CH<sub>2</sub>OTBS), 40.7 (C<sub>q</sub>CH<sub>2</sub>CH<sub>2</sub>OTBS), 33.5 (3-C), 33.2 (3-C), 26.1 (SiC<sub>q</sub>(CH<sub>3</sub>)<sub>3</sub>), 26.0 (SiC<sub>q</sub>(CH<sub>3</sub>)<sub>3</sub>), 18.5 (SiC<sub>q</sub>), 18.3 (SiC<sub>q</sub>), -5.2 (SiCH<sub>3</sub>), -5.3 (SiCH<sub>3</sub>) [30 of 42 expected peaks observed]. **IR** ν<sub>max</sub>(film)/cm<sup>-1</sup> 2953, 2928, 2857, 1708 (CO) 1418, 1254, 1097, 836. **HRMS** (ESI): C<sub>29</sub>H<sub>51</sub>NNaO<sub>5</sub>Si<sub>2</sub> [M+H]<sup>+</sup>; calculated 572.3204, found 572.3205.

**(2R\*,3aR\*,6aR\*)-6a-{2-[(*tert*-Butyldimethylsilyl)oxy]ethyl}-2-[(*tert*-butyldimethylsilyl)oxy]methyl}-hexahydro-2H-furo[2,3-c]pyrrole **S45****

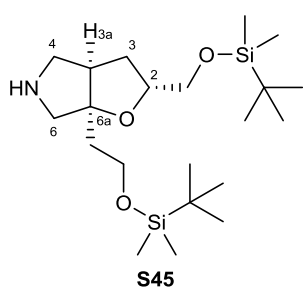

Hydrogenation was carried out following general procedure **B**, using carbamate **S44** (1.15 g, 2.09 mmol) and Pd/C (100 mg, 10% w/w) in EtOH (20 mL) over 15 h. Filtration followed by concentration gave the *title compound* **S45** (867 mg, 2.09 mmol, 99%) as a colourless amorphous solid, which was not purified further. **<sup>1</sup>H NMR** (500 MHz, CDCl<sub>3</sub>, mixture of rotamers, NH not observed): δ 4.54-4.47 (1H, m, 2-H), 3.83-3.75 (1H, m,

C<sub>q</sub>CH<sub>2</sub>CH<sub>A</sub>H<sub>B</sub>OTBS), 3.75-3.67 (2H, m, CHCH<sub>A</sub>H<sub>B</sub>OTBS and C<sub>q</sub>CH<sub>2</sub>CH<sub>A</sub>H<sub>B</sub>OTBS), 3.58-3.47 (3H, m, 4-H<sub>A</sub>, 6-H<sub>A</sub> and CHCH<sub>A</sub>H<sub>B</sub>OTBS), 3.27-3.20 (2H, m, 4-H<sub>B</sub> and 6-H<sub>B</sub>), 2.82-2.75 (1H, m, 3a-H), 2.21 (1H, ddd, *J* 12.8, 9.9, 7.3, 3-H<sub>A</sub>), 1.93-1.82 (4H, m, 3-H<sub>B</sub> and C<sub>q</sub>CH<sub>2</sub>CH<sub>2</sub>OTBS), 0.90-0.86 (18H, m, SiC<sub>q</sub>(CH<sub>3</sub>)<sub>3</sub>), 0.05-0.02 (12H, m, SiCH<sub>3</sub>). **<sup>13</sup>C NMR** (125 MHz, CDCl<sub>3</sub>): δ 91.1 (6a-C), 80.3 (2-C), 64.2 (CHCH<sub>2</sub>OTBS), 59.0 (C<sub>q</sub>CH<sub>2</sub>CH<sub>2</sub>OTBS), 55.4 (6-C), 50.0 (4-C), 46.9 (3a-C), 39.7 (C<sub>q</sub>CH<sub>2</sub>CH<sub>2</sub>OTBS), 32.4 (3-C), 26.1 (2 peaks, SiC<sub>q</sub>(CH<sub>3</sub>)<sub>3</sub>), 18.5 (SiC<sub>q</sub>), 18.4 (SiC<sub>q</sub>), -5.2 (SiCH<sub>3</sub>), -5.3 (2 peaks, SiCH<sub>3</sub>), -5.4 (SiCH<sub>3</sub>). **IR** ν<sub>max</sub>(film)/cm<sup>-1</sup> 2953, 2928, 2857, 1471, 1463, 1254, 1094, 836. **HRMS** (ESI): C<sub>21</sub>H<sub>46</sub>NO<sub>3</sub>Si<sub>2</sub> [M+H]<sup>+</sup>; calculated 416.3016, found 416.3011.

**(2R\*,3aR\*,6aR\*)-6a-{2-[(tert-Butyldimethylsilyl)oxy]ethyl}-2-[(tert-butylidimethylsilyl)oxy]methyl}-5-(2-methylpropyl)-hexahydro-2H-furo[2,3-c]pyrrole **S46****

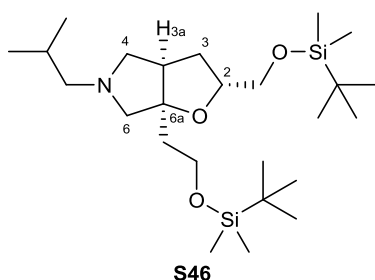

Reductive amination was carried out by following general procedure **C**, using compound **S45** (293 mg, 0.71 mmol) and isobutyraldehyde (2.5 eq.). The crude reaction mixture was partitioned between EtOAc (25 mL) and brine (25 mL). The phases were separated and the aqueous phase was extracted with EtOAc (2 x 25 mL). The combined organic phases were dried over MgSO<sub>4</sub>, filtered and concentrated *in vacuo*. Flash chromatography eluting with 100:2.5:1 pentane–EtOAc–NEt<sub>3</sub> gave the *title compound S46* (162 mg, 0.34 mmol, 48%) as a colourless oil. *R<sub>f</sub>* 0.30 (100:2.5:1 pentane–EtOAc–NEt<sub>3</sub>). <sup>1</sup>H NMR (500 MHz, CDCl<sub>3</sub>): δ 4.29-4.20 (1H, m, 2-H), 3.78-3.69 (2H, m, C<sub>q</sub>CH<sub>2</sub>CH<sub>2</sub>OTBS), 3.67 (1H, dd, *J* 10.6, 4.6, CHCH<sub>A</sub>H<sub>B</sub>OTBS), 3.59 (1H, dd, *J* 10.6, 4.9, CHCH<sub>A</sub>H<sub>B</sub>OTBS), 2.73 (1H, d, *J* 9.9, 6-H<sub>A</sub>), 2.53-2.47 (2H, m, 3a-H and 4-H<sub>A</sub>), 2.46-2.40 (1H, m, 4-H<sub>B</sub>), 2.27 (1H, d, *J* 9.9, 6-H<sub>B</sub>), 2.10-2.01 (2H, m, NCH<sub>2</sub>CH(CH<sub>3</sub>)<sub>2</sub>), 1.95-1.87 (1H, m, C<sub>q</sub>CH<sub>A</sub>H<sub>B</sub>CH<sub>2</sub>OTBS), 1.87-1.74 (2H, m, 3-H<sub>A</sub> and C<sub>q</sub>CH<sub>A</sub>H<sub>B</sub>CH<sub>2</sub>OTBS), 1.71-1.60 (2H, m, 3-H<sub>B</sub> and NCH<sub>2</sub>CH(CH<sub>3</sub>)<sub>2</sub>), 0.91-0.86 (24H, m, includes: 18H, SiC<sub>q</sub>(CH<sub>3</sub>)<sub>3</sub>; and 6H, NCH<sub>2</sub>CH(CH<sub>3</sub>)<sub>2</sub>), 0.05 (6H, s, SiCH<sub>3</sub>), 0.04 (6H, s, SiCH<sub>3</sub>). <sup>13</sup>C NMR (125 MHz, CDCl<sub>3</sub>, mixture of 2 rotamers): δ 91.1 (6a-C), 80.3 (2-C), 66.8 (6-C), 65.7 (CHCH<sub>2</sub>OTBS), 64.4 (NCH<sub>2</sub>CH(CH<sub>3</sub>)<sub>2</sub>), 61.8 (4-C), 60.1 (C<sub>q</sub>CH<sub>2</sub>CH<sub>2</sub>OTBS), 46.7 (3a-C), 41.8 (C<sub>q</sub>CH<sub>2</sub>CH<sub>2</sub>OTBS), 36.4 (3-C), 27.2 (NCH<sub>2</sub>CH(CH<sub>3</sub>)<sub>2</sub>), 26.1 (2 peaks, SiC<sub>q</sub>(CH<sub>3</sub>)<sub>3</sub>), 21.1 (NCH<sub>2</sub>CH(CH<sub>3</sub>)<sub>2</sub>), 21.0 (NCH<sub>2</sub>CH(CH<sub>3</sub>)<sub>2</sub>), 18.6 (SiC<sub>q</sub>), 18.4 (SiC<sub>q</sub>), -5.1 (2 peaks, SiCH<sub>3</sub>) [19 of 36 expected peaks observed]. IR *v*<sub>max</sub>(film)/cm<sup>-1</sup> 2953, 2928, 2857, 2771, 1472, 1463, 1253, 1092. HRMS (ESI): C<sub>25</sub>H<sub>54</sub>NO<sub>3</sub>Si<sub>2</sub> [M+H]<sup>+</sup>; calculated 472.3642, found 472.3647.

**2-[(2R\*,3aR\*,6aR\*)-6a-{2-[(tert-Butyldimethylsilyl)oxy]ethyl}-2-[(tert-butylidimethylsilyl)oxy]methyl}-hexahydro-2H-furo[2,3-c]pyrrol-5-yl]methyl}-1,3-thiazole **S47****

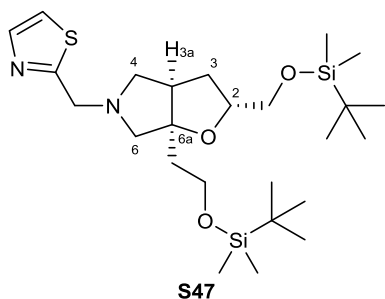

Reductive amination was carried out by following general procedure **C**, using compound **S45** (270 mg, 0.65 mmol) and 1,3-thiazolecarbaldehyde (2.5 eq.). The crude reaction mixture was partitioned between EtOAc (25 mL) and brine (25 mL). The phases were separated and the aqueous phase was extracted with EtOAc (2 x 25 mL). The combined organic phases were dried over MgSO<sub>4</sub>, filtered and concentrated *in vacuo*. Flash chromatography eluting with 4:1 pentane–EtOAc gave the *title compound S47* (209 mg, 0.41 mmol, 63%) as a colourless oil. *R<sub>f</sub>* 0.39 (4:1 pentane–EtOAc).

**<sup>1</sup>H NMR** (500 MHz, CDCl<sub>3</sub>, 50:50 mixture of rotamers): δ 7.68 (1H, d, *J* 3.3, thiazole 4-H), 7.27 (1H, d, *J* 3.3, thiazole 5-H), 4.41-4.26 (1H, m, 2-H), 3.91 (1H, d, *J* 15.0, 6-H<sub>A</sub>), 3.86 (1H, d, *J* 15.0, 6-H<sub>B</sub>), 3.79-3.71 (2H, m, C<sub>q</sub>CH<sub>2</sub>CH<sub>2</sub>OTBS), 3.69 (1H, dd, *J* 10.7, 4.5, CHCH<sub>A</sub>H<sub>B</sub>OTBS), 3.62 (1H, dd, *J* 10.7, 4.8, CHCH<sub>A</sub>H<sub>B</sub>OTBS), 2.98 (1H, d, *J* 9.7, NCH<sub>A</sub>H<sub>B</sub>Ar), 2.73 (1H, dd, *J* 9.1, 3.1, 4-H<sub>B</sub>), 2.67 (1H, app. t, *J* 8.1, 4-H<sub>A</sub>), 2.61 (1H, td, *J* 7.6, 2.6, 3a-H), 2.53 (1H, d, *J* 9.7, NCH<sub>A</sub>H<sub>B</sub>Ar), 1.97-1.81 (3H, m, 3-H<sub>A</sub> and C<sub>q</sub>CH<sub>2</sub>CH<sub>2</sub>OTBS), 1.74 (1H, dd, *J* 12.4, 5.3, 3-H<sub>B</sub>), 0.90 (9H, s, SiC<sub>q</sub>(CH<sub>3</sub>)<sub>3</sub>), 0.88 (9H, s, SiC<sub>q</sub>(CH<sub>3</sub>)<sub>3</sub>), 0.07 (6H, 2 × s, SiCH<sub>3</sub>), 0.04 (6H, s, SiCH<sub>3</sub>). **<sup>13</sup>C NMR** (125 MHz, CDCl<sub>3</sub>, mixture of 2 rotamers): δ 171.3 (thiazole 2-C), 142.2 (thiazole 4-C), 141.6 (thiazole 4-C), 119.5 (thiazole 5-C), 91.3 (6a-C), 80.7 (2-C), 66.6 (NCH<sub>2</sub>Ar), 65.7 (CHCH<sub>2</sub>OTBS), 61.3 (4-C), 59.9 (C<sub>q</sub>CH<sub>2</sub>CH<sub>2</sub>OTBS), 56.8 (6-C), 47.1 (3a-C), 41.6 (C<sub>q</sub>CH<sub>2</sub>CH<sub>2</sub>OTBS), 36.1 (3-C), 26.2 (SiC<sub>q</sub>(CH<sub>3</sub>)<sub>3</sub>), 26.1 (SiC<sub>q</sub>(CH<sub>3</sub>)<sub>3</sub>), 18.6 (SiC<sub>q</sub>), 18.4 (SiC<sub>q</sub>), -5.1 (SiCH<sub>3</sub>), -5.2 (SiCH<sub>3</sub>) [20 of 38 expected peaks observed]. **IR** *v*<sub>max</sub>(film)/cm<sup>-1</sup> 2953, 2928, 2795, 1472, 1254, 1138, 1093, 836. **HRMS** (ESI): C<sub>25</sub>H<sub>49</sub>N<sub>2</sub>O<sub>3</sub>SSi<sub>2</sub> [M+H]<sup>+</sup>; calculated 513.3002, found 513.3002.

**(2*R*\*,3*aR*\*,6*aR*\*)-6a-{2-[(*tert*-Butyldimethylsilyl)oxy]ethyl}-2-[[(*tert*-butyldimethylsilyl)oxy]methyl]-5-cyclobutanecarbonyl-hexahydro-2H-furo[2,3-*c*]pyrrole **S48****

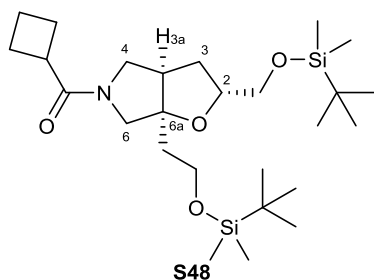

Cyclobutanecarbonyl chloride (0.42 mL, 3.66 mmol, 5.00 eq.) was added to a stirred solution of compound **S45** (304 mg, 0.73 mmol, 1.00 eq.) in pyridine (10 mL) at 0 °C. The reaction mixture was warmed to rt then stirred for 15 h. The reaction mixture was concentrated *in vacuo*, then partitioned between EtOAc (25 mL) and sat. aq. NaHCO<sub>3</sub> solution (25 mL). The phases were separated and the aqueous phase was extracted with EtOAc (2 × 25 mL). The combined organic phases were dried over MgSO<sub>4</sub>, filtered and concentrated *in vacuo*. Flash chromatography eluting with 7:3 pentane–EtOAc gave the *title compound* **S48** (155 mg, 0.31 mmol, 43%) as a colourless oil. *R*<sub>f</sub> 0.15 (4:1 pentane–EtOAc). **<sup>1</sup>H NMR** (500 MHz, CDCl<sub>3</sub>, 330 K, 25:75 mixture of rotamers): δ 4.21-4.08 (1H, m, 2-H), 3.86-3.54 (6H, m, includes: 1H, 4-H<sub>A</sub>; 1H, 6-H<sub>A</sub>; 2H, CHCH<sub>2</sub>OTBS; and 2H, C<sub>q</sub>CH<sub>2</sub>CH<sub>2</sub>OTBS), 3.52-3.39 (1.75H, m, includes: 0.75H, 4-H<sub>B</sub>; and 1H, 6-H<sub>B</sub>), 3.26-3.08 (1.25H, m, includes: 0.25H, 4-H<sub>B</sub>; and 1H, cyclobutyl 1-H), 2.81-2.67 (0.25H, m, 3a-H), 2.67-2.56 (0.75H, m, 3a-H), 2.41-2.24 (2H, m, cyclobutyl 2-H), 2.21-2.07 (2H, m, cyclobutyl 2-H), 2.07-1.74 (6H, m, includes: 2H, 3-H; 2H, cyclobutyl 3-H; and 2H, C<sub>q</sub>CH<sub>2</sub>CH<sub>2</sub>OTBS), 0.92 (6H, s, SiC<sub>q</sub>(CH<sub>3</sub>)<sub>3</sub>), 0.90 (12H, s, SiC<sub>q</sub>(CH<sub>3</sub>)<sub>3</sub>) 0.09-0.04 (12H, m, SiCH<sub>3</sub>). **<sup>13</sup>C NMR** (125 MHz, CDCl<sub>3</sub>, 300 K, mixture of rotamers): δ 173.2 (N(CO)CH), 172.9 (N(CO)CH), 91.4 (6a-C), 89.8 (6a-C), 79.7 (2-C), 79.2 (2-C),

65.5 (CHCH<sub>2</sub>OTBS), 65.2 (CHCH<sub>2</sub>OTBS), 59.3 (C<sub>q</sub>CH<sub>2</sub>CH<sub>2</sub>OTBS), 59.2 (C<sub>q</sub>CH<sub>2</sub>CH<sub>2</sub>OTBS), 57.0 (6-C), 56.2 (6-C), 50.9 (4-C), 50.4 (4-C), 47.2 (3a-C), 45.9 (3a-C), 40.8 (C<sub>q</sub>CH<sub>2</sub>CH<sub>2</sub>OTBS), 40.5 (C<sub>q</sub>CH<sub>2</sub>CH<sub>2</sub>OTBS), 38.2 (cyclobutyl 1-C), 38.1 (cyclobutyl 1-C), 33.6 (3-C), 33.1 (3-C), 25.9 (3 peaks, SiC<sub>q</sub>(CH<sub>3</sub>)<sub>3</sub>), 24.7 (2 peaks, cyclobutyl 2-C), 24.6 (cyclobutyl 2-C), 18.4 (SiC<sub>q</sub>), 18.2 (SiC<sub>q</sub>), 18.1 (cyclobutyl 3-C), 18.0 (cyclobutyl 3-C), -5.4 (3 peaks, SiCH<sub>3</sub>), -5.5 (SiCH<sub>3</sub>). **IR**  $\nu_{\text{max}}$ (film)/cm<sup>-1</sup> 2952, 2929, 2857, 1645 (CO), 1432, 1254, 1095, 836. **HRMS** (ESI): C<sub>26</sub>H<sub>52</sub>NO<sub>4</sub>Si<sub>2</sub> [M+H]<sup>+</sup>; calculated 498.3435, found 498.3440.

## 2-[(2*R*\*,3*aR*\*,6*aR*\*)-2-(Hydroxymethyl)-5-(2-methylpropyl)-hexahydro-2H-furo[2,3-*c*]pyrrol-6a-yl]ethan-1-ol **F26**

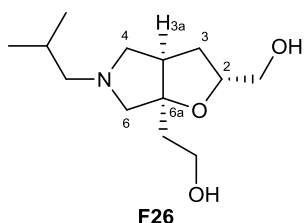

O-Silyl deprotection was carried out by following general procedure **G**, using compound **S46** (270 mg, 0.65 mmol) and (±)-camphorsulfonic acid (6.0 eq.) Flash chromatography eluting with 50:8:1 CH<sub>2</sub>Cl<sub>2</sub>-EtOH-NH<sub>3</sub>/MeOH gave the *title compound* **F26** (82 mg, 0.34 mmol, 99%) as a colourless oil. **R<sub>f</sub>** 0.50 (50:8:1 CH<sub>2</sub>Cl<sub>2</sub>-EtOH-NH<sub>3</sub>/MeOH). **<sup>1</sup>H NMR** (500 MHz, CDCl<sub>3</sub>, 2 × OH not

observed): δ 4.36-4.24 (1H, m, 2-H), 3.87-3.75 (3H, m, CHCH<sub>A</sub>H<sub>B</sub>OH and C<sub>q</sub>CH<sub>2</sub>CH<sub>2</sub>OH), 3.56 (1H, dd, *J* 11.7, 4.4, CHCH<sub>A</sub>H<sub>B</sub>OH), 2.80-2.75 (1H, m, 4-H<sub>A</sub>), 2.66-2.54 (3H, m, includes: 1H, 3a-H; at δ 2.64: 1H, d, *J* 9.9, 6-H<sub>A</sub>; and at δ 2.57: 1H, d, *J* 9.9, 6-H<sub>B</sub>), 2.34 (1H, dd, *J* 9.4, 5.0, 4-H<sub>B</sub>), 2.13 (2H, d, *J* 7.3, NCH<sub>2</sub>CH(CH<sub>3</sub>)<sub>2</sub>), 2.01-1.90 (3H, m, 3-H<sub>A</sub> and C<sub>q</sub>CH<sub>2</sub>CH<sub>2</sub>OH), 1.75-1.61 (2H, m, includes: 1H, NCH<sub>2</sub>CH(CH<sub>3</sub>)<sub>2</sub>; and at δ 1.65: 1H, dd, *J* 12.4, 5.0, 3-H<sub>B</sub>), 0.90 (6H, d, *J* 6.6, NCH<sub>2</sub>CH(CH<sub>3</sub>)<sub>2</sub>). **<sup>13</sup>C NMR** (125 MHz, CDCl<sub>3</sub>): δ 93.1 (6a-C), 79.5 (2-C), 65.8 (6-C), 64.3 (NCH<sub>2</sub>CH(CH<sub>3</sub>)<sub>2</sub>), 63.8 (CHCH<sub>2</sub>OH), 61.6 (4-C), 60.2 (C<sub>q</sub>CH<sub>2</sub>CH<sub>2</sub>OH), 46.5 (3a-C), 40.5 (C<sub>q</sub>CH<sub>2</sub>CH<sub>2</sub>OH), 34.2 (3-C), 27.1 (NCH<sub>2</sub>CH(CH<sub>3</sub>)<sub>2</sub>), 21.0 (2 peaks, NCH<sub>2</sub>CH(CH<sub>3</sub>)<sub>2</sub>). **IR**  $\nu_{\text{max}}$ (film)/cm<sup>-1</sup> 3383 (br. s, OH), 2952, 2869, 2787, 1466, 1081, 1043, 1002. **HRMS** (ESI): C<sub>13</sub>H<sub>26</sub>NO<sub>3</sub> [M+H]<sup>+</sup>; calculated 244.1913, found 244.1909.

## 2-[(2*R*\*,3*aR*\*,6*aR*\*)-2-(Hydroxymethyl)-5-(1,3-thiazol-2-ylmethyl)-hexahydro-2H-furo[2,3-*c*]pyrrol-6a-yl]ethan-1-ol **F27**

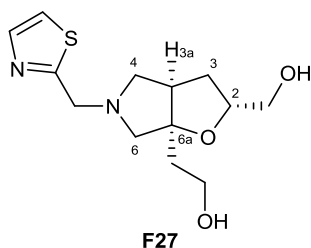

O-Silyl deprotection was carried out by following general procedure **G**, using compound **S47** (208 mg, 0.41 mmol) and (±)-camphorsulfonic acid (10.0 eq.) over 30 h. The residue was partitioned between CH<sub>2</sub>Cl<sub>2</sub> (20 mL) and sat. aq. NaHCO<sub>3</sub> (20 mL) and the phases were separated. The aqueous phase was extracted with CH<sub>2</sub>Cl<sub>2</sub> (2 × 20 mL). The combined organic phase

was dried over Na<sub>2</sub>SO<sub>4</sub> and concentrated *in vacuo*. Flash chromatography eluting with 50:8:1

CH<sub>2</sub>Cl<sub>2</sub>–EtOH–NH<sub>3</sub>/MeOH gave the *title compound* **F27** (107 mg, 0.38 mmol, 92%) as a yellow oil. **R<sub>f</sub>** 0.64 (50:8:1 CH<sub>2</sub>Cl<sub>2</sub>–EtOH–NH<sub>3</sub>/MeOH). **<sup>1</sup>H NMR** (500 MHz, CDCl<sub>3</sub>, 50:50 mixture of rotamers, 2 × OH not observed): δ 7.70 (1H, d, *J* 3.3, thiazole 4-H), 7.29 (1H, d, *J* 3.3, thiazole 5-H), 4.49–4.42 (1H, m, 2-H), 3.94 (1H, d, *J* 15.0, 6-H<sub>A</sub>), 3.90 (1H, d, *J* 15.0, 6-H<sub>B</sub>), 3.86 (0.5H, d, *J* 2.8, CHCH<sub>A</sub>H<sub>B</sub>OH), 3.84 (0.5H, d, *J* 2.8, CHCH<sub>A</sub>H<sub>B</sub>OH), 3.81 (2H, app. t, *J* 5.5, C<sub>q</sub>CH<sub>2</sub>CH<sub>2</sub>OH), 3.58 (0.5H, d, *J* 4.2, CHCH<sub>A</sub>H<sub>B</sub>OH), 3.55 (0.5H, d, *J* 4.2, CHCH<sub>A</sub>H<sub>B</sub>OH), 3.02 (1H, d, *J* 9.6, NCH<sub>A</sub>H<sub>B</sub>Ar), 2.85–2.77 (1H, m, 4-H<sub>A</sub>), 2.73 (0.5H, d, *J* 3.3, 4-H<sub>B</sub>), 2.72 (0.5H, d, *J* 3.3, 4-H<sub>B</sub>), 2.63 (2H, s, 3a-H and NCH<sub>A</sub>H<sub>B</sub>Ar), 2.11–1.98 (2H, m, 3-H<sub>A</sub> and C<sub>q</sub>CH<sub>A</sub>H<sub>B</sub>CH<sub>2</sub>OH), 1.92 (0.5H, t, *J* 5.4, C<sub>q</sub>CH<sub>A</sub>H<sub>B</sub>CH<sub>2</sub>OH), 1.90 (0.5H, t, *J* 5.4, C<sub>q</sub>CH<sub>A</sub>H<sub>B</sub>CH<sub>2</sub>OH), 1.73 (0.5H, d, *J* 5.4, 3-H<sub>B</sub>), 1.71 (0.5H, d, *J* 5.4, 3-H<sub>B</sub>). **<sup>13</sup>C NMR** (125 MHz, CDCl<sub>3</sub>, one Ar-C<sub>q</sub> not observed): 142.4 (thiazole 4-C), 119.7 (thiazole 5-C), 93.4 (6a-C), 80.7 (2-C), 66.1 (NCH<sub>2</sub>Ar), 63.6 (CHCH<sub>2</sub>OH), 61.2 (4-C), 60.1 (C<sub>q</sub>CH<sub>2</sub>CH<sub>2</sub>OH), 56.4 (6-C), 47.3 (3a-C), 40.1 (C<sub>q</sub>CH<sub>2</sub>CH<sub>2</sub>OH), 34.4 (3-C). **IR**  $\nu_{\max}$ (film)/cm<sup>-1</sup> 3359 (br., OH), 2950, 2926, 2870, 2797, 1136, 1081, 1042. **HRMS** (ESI): C<sub>13</sub>H<sub>21</sub>N<sub>2</sub>O<sub>3</sub>S [M+H]<sup>+</sup>; calculated 285.1273, found 285.1271.

## 2-[(2*R*\*,3*aR*\*,6*aR*\*)-5-Cyclobutanecarbonyl-2-(hydroxymethyl)-hexahydro-2H-furo[2,3-*c*]pyrrol-6*a*-yl]ethan-1-ol **F28**

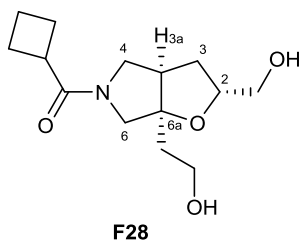

O-Silyl deprotection was carried out by following general procedure **G**, using compound **S48** (166 mg, 0.330 mmol) and (±)-camphorsulfonic acid (5.0 eq.) Flash chromatography eluting with 50:8:1 CH<sub>2</sub>Cl<sub>2</sub>–EtOH–NH<sub>3</sub>/MeOH gave the *title compound* **F28** (83 mg, 0.310 mmol, 94%) as a yellow oil. **R<sub>f</sub>** 0.36 (50:8:1 CH<sub>2</sub>Cl<sub>2</sub>–EtOH–NH<sub>3</sub>/MeOH). **<sup>1</sup>H NMR** (500 MHz, CDCl<sub>3</sub>, 330 K, 60:40

mixture of rotamers): δ 4.32–4.21 (1H, m, 2-H), 3.94–3.78 (3.4H, m, includes: 0.4H, 6-H<sub>A</sub>; 2H, C<sub>q</sub>CH<sub>2</sub>CH<sub>2</sub>OH; and 1H, CHCH<sub>A</sub>H<sub>B</sub>OH), 3.77–3.69 (1.2H, m, includes: 0.6H, 4-H<sub>B</sub>; and 0.6H, 6-H<sub>A</sub>), 3.66 (0.4H, dd, *J* 11.0, 8.8, 4-H<sub>B</sub>), 3.54–3.41 (1.6H, m, includes: 0.6H, 4-H<sub>A</sub>; and 1H, CHCH<sub>A</sub>H<sub>B</sub>OH), 3.45 (0.4H, d, *J* 12.4, 6-H<sub>B</sub>), 3.34 (0.6H, d, *J* 12.4, 6-H<sub>B</sub>), 3.25 (0.4H, dd, *J* 11.0, 6.1, 4-H<sub>A</sub>), 3.21–3.11 (1H, m, cyclobutyl 1-H), 2.80 (2H, br. s, 2 × OH), 2.76–2.69 (0.4H, m, 3a-H), 2.68–2.61 (0.6H, m, 3a-H), 2.39–2.06 (5H, m, includes: 1H, 3-H<sub>A</sub>; and 4H, cyclobutyl 2-H), 2.03–1.92 (2H, m, C<sub>q</sub>CH<sub>2</sub>CH<sub>2</sub>OH), 1.92–1.76 (3H, m, includes: 1H, 3-H<sub>B</sub>; and 2H, cyclobutyl 3-H). **<sup>13</sup>C NMR** (125 MHz, CDCl<sub>3</sub>, mixture of rotamers): δ 173.5 (N(CO)CH), 173.3 (N(CO)CH), 93.4 (6a-C), 92.0 (6a-C), 80.3 (2-C), 79.9 (2-C), 63.7 (2 peaks, CHCH<sub>2</sub>OH), 60.2 (C<sub>q</sub>CH<sub>2</sub>CH<sub>2</sub>OH), 60.0 (C<sub>q</sub>CH<sub>2</sub>CH<sub>2</sub>OH), 57.0 (6-C), 56.3 (6-C), 51.1 (4-C), 50.9 (4-C), 47.9 (3a-C), 46.1 (3a-C), 39.4 (C<sub>q</sub>CH<sub>2</sub>CH<sub>2</sub>OH), 39.3 (C<sub>q</sub>CH<sub>2</sub>CH<sub>2</sub>OH), 38.3 (cyclobutyl 1-C), 38.2 (cyclobutyl 1-C), 33.0 (3-C), 32.4 (3-C), 24.9 (cyclobutyl 2-C), 24.8 (3 peaks, cyclobutyl 2-C), 18.2 (2 peaks, cyclobutyl 3-C) [28 of 28 expected peaks

observed]. **IR**  $\nu_{\text{max}}$ (film)/ $\text{cm}^{-1}$  3391, 2942, 2872, 1617, 1450, 1088, 1047. **HRMS** (ESI):  $\text{C}_{14}\text{H}_{23}\text{NNaO}_4$  [M+Na]<sup>+</sup>; calculated 292.1525, found 292.1525.

#### 5.4.3.4 Preparation of fragments derived from scaffold 8

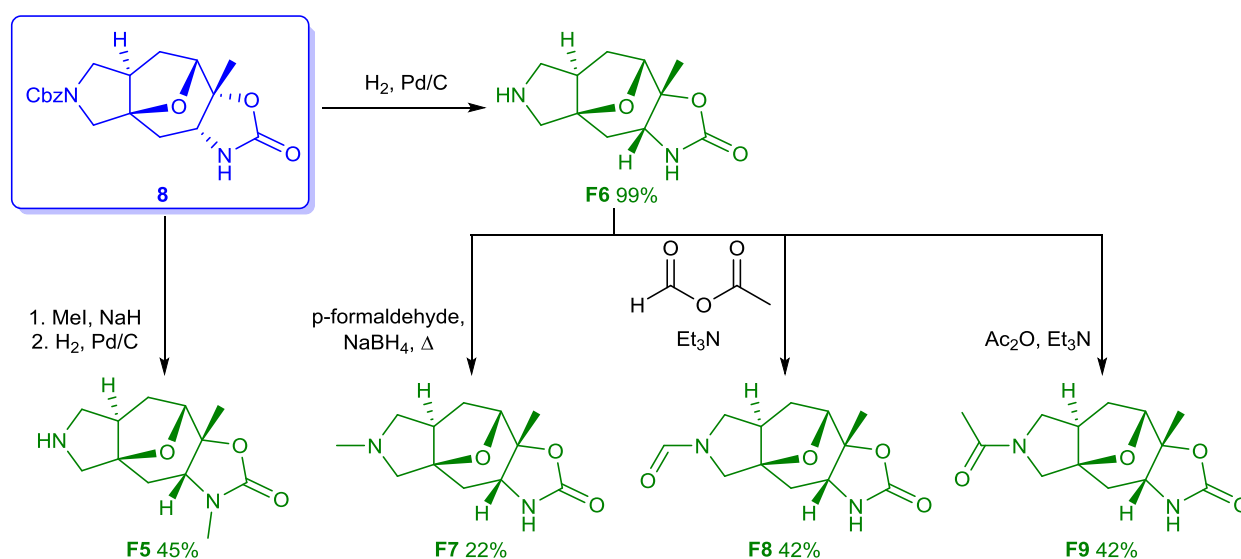

#### (1*R*\*,3*R*\*,7*R*\*,8*R*\*,10*R*\*)-4,7-dimethyl-6,14-dioxa-4,12-diazatetracyclo[6.5.1.0<sup>1,10</sup>.0<sup>3,7</sup>]tetradecan-5-one **F5**

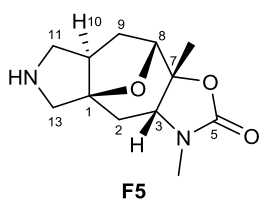

$\text{NaH}$  (60% dispersion in mineral oil, 4 mg, 100  $\mu\text{mol}$ , 1.2 eq.) was added to a stirred solution of **8** (30 mg, 84  $\mu\text{mol}$ , 1.0 eq.) in THF (10 mL) at 0 °C. MeI (50  $\mu\text{L}$ , 0.80 mmol, 10.0 eq.) was added and the reaction mixture was stirred for 15 h. The reaction mixture was quenched by the addition of sat. aq.  $\text{NH}_4\text{Cl}$  solution (0.3 mL), then concentrated *in vacuo*. The resulting residue was flushed through a pad of  $\text{SiO}_2$ , eluting with 9:1 EtOAc–MeOH, and carried forward to the next step without further purification. The crude residue was subjected to hydrogenation following general procedure **B**, using Pd/C (10 mg, 33% w/w) and MeOH (10 mL) over 15 h. Flash chromatography eluting with 93:7:1  $\text{CH}_2\text{Cl}_2$ –EtOH– $\text{NH}_3$ /MeOH gave the *title compound* **F5** (9 mg, 38  $\mu\text{mol}$ , 45%) as a colourless oil.  $R_f$  0.13 (50:8:1  $\text{CH}_2\text{Cl}_2$ –EtOH– $\text{NH}_3$ /MeOH).  $^1\text{H NMR}$  (400 MHz, MeOD- $d_4$ , NH not observed):  $\delta$  4.25 (1H, d,  $J$  7.2, 8-H), 3.67 (1H, dd,  $J$  5.0, 1.4, 3-H), 3.11–3.01 (2H, m, includes at  $\delta$  3.08: 1H, d,  $J$  12.6, 13- $\text{H}_A$ ; and at  $\delta$  3.05: 1H, dd,  $J$  12.0, 8.4, 11- $\text{H}_B$ ), 2.84 (3H, s, O(CO)NCH<sub>3</sub>), 2.74 (1H, dd,  $J$  12.0, 3.7, 11- $\text{H}_A$ ), 2.64 (1H, d,  $J$  12.6, 13- $\text{H}_B$ ), 2.52–2.44 (1H, m, 10-H), 2.32 (1H, dd,  $J$  13.8, 9.2, 9- $\text{H}_A$ ), 2.14–2.08 (2H, m, 2-H), 1.81–1.72 (1H, m, 9- $\text{H}_B$ ), 1.60 (3H, s,  $\text{C}_q\text{CH}_3$ ).  $^{13}\text{C NMR}$  (100 MHz, MeOD- $d_4$ ):  $\delta$  160.8 (5-C), 92.4 (1-C), 84.1 (8-C), 78.3 (7-C), 62.2 (3-C), 56.5 (11-C or 13-C), 56.2 (11-C or 13-C), 46.7 (10-C), 35.6 (9-C), 30.7 (2-C), 29.6 (O(CO)NCH<sub>3</sub>), 24.8 ( $\text{C}_q\text{CH}_3$ ).  $\text{IR } \nu_{\text{max}}$ (film)/ $\text{cm}^{-1}$  2935, 2874, 1748 (CO), 1658, 1426, 1399, 1277, 1046. **HRMS** (ESI):  $\text{C}_{12}\text{H}_{19}\text{N}_2\text{O}_3$  [M+H]<sup>+</sup>; calculated 239.1390, found 239.1392.



**(1R\*,3R\*,7R\*,8R\*,10R\*)-7-Methyl-6,14-dioxa-4,12-diazatetracyclo[6.5.1.0<sup>1,10</sup>.0<sup>3,7</sup>]tetradecan-5-one F6**

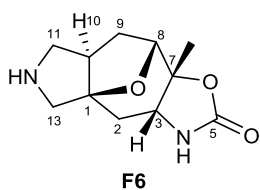

Hydrogenation was carried out following general procedure **B**, using compound **8** (335 mg, 0.93 mmol, 1.0 eq.) and Pd/C (30 mg, 10% w/w) in MeOH (10 mL) over 15 h. Filtration followed by concentration gave the *title compound F6* (207 mg, 0.92 mmol, 99%) as a colourless foam which was carried on to the subsequent steps without further purification. **<sup>1</sup>H NMR** (400 MHz, MeOD-*d*<sub>4</sub>, 2 × NH not observed): δ 4.33 (1H, d, *J* 7.5, 8-H), 3.94 (1H, d, *J* 5.9, 3-H), 3.58-3.50 (2H, m, includes: 1H, 11-H<sub>B</sub>; and at δ 3.53: 1H, d, *J* 12.4, 13-H<sub>A</sub>), 3.23 (1H, d, *J* 12.4, 13-H<sub>B</sub>), 3.19 (1H, dd, *J* 12.3, 3.9, 11-H<sub>A</sub>), 3.14-3.04 (1H, m, 10-H), 2.51 (1H, dd, *J* 14.1, 9.2, 9-H<sub>A</sub>), 2.25 (1H, dd, *J* 14.9, 5.9, 2-H<sub>A</sub>), 2.03 (1H, d, *J* 14.9, 2-H<sub>B</sub>), 1.96 (1H, ddd, *J* 14.1, 7.5, 4.9, 9-H<sub>B</sub>), 1.59 (3H, s, C<sub>q</sub>CH<sub>3</sub>). **<sup>13</sup>C NMR** (100 MHz, MeOD-*d*<sub>4</sub>): δ 161.1 (5-C), 89.9 (1-C), 83.4 (8-C), 79.8 (7-C), 56.4 (3-C), 54.5 (11-C or 13-C), 54.1 (11-C or 13-C), 44.8 (10-C), 35.6 (2-C), 32.4 (9-C), 24.7 (C<sub>q</sub>CH<sub>3</sub>). **IR** *v*<sub>max</sub>(film)/cm<sup>-1</sup> 3230, 2936, 2774, 1749, 1385, 1279, 1048. **HRMS** (ESI): C<sub>11</sub>H<sub>17</sub>N<sub>2</sub>O<sub>3</sub> [M+H]<sup>+</sup>; calculated 225.1234, found 225.1229.

**(1R\*,3R\*,7R\*,8R\*,10R\*)-7,12-Dimethyl-6,14-dioxa-4,12-diazatetracyclo[6.5.1.0<sup>1,10</sup>.0<sup>3,7</sup>]tetradecan-5-one F7**

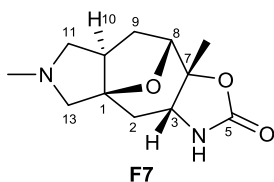

Reductive amination was carried out by following general procedure **C**, using compound **F6** (37 mg, 0.17 mmol) and p-formaldehyde (5.0 eq.) at reflux. Flash chromatography eluting with 98:2:0.1 CH<sub>2</sub>Cl<sub>2</sub>-EtOH-NH<sub>3</sub>/MeOH gave the *title compound F7* (9 mg, 38 μmol, 22%) as a colourless oil. *R<sub>f</sub>* 0.55 (98:2:0.1 CH<sub>2</sub>Cl<sub>2</sub>-EtOH-NH<sub>3</sub>/MeOH). **<sup>1</sup>H NMR** (400 MHz, MeOD-*d*<sub>4</sub>, NH not observed): δ 4.27 (1H, d, *J* 7.3, 8-H), 3.88 (1H, d, *J* 5.9, 3-H), 2.93-2.82 (2H, m, includes: 1H, 10-H; and at δ 2.89: 1H, d, *J* 10.7, 13-H<sub>A</sub>), 2.72 (1H, dd, *J* 9.8, 8.6, 11-H<sub>B</sub>), 2.58 (1H, dd, *J* 9.8, 4.8, 11-H<sub>A</sub>), 2.47 (1H, d, *J* 10.7, 13-H<sub>B</sub>), 2.39-2.31 (4H, m, includes: 1H, 9-H<sub>A</sub>; and at δ 2.36: 3H, s, NCH<sub>3</sub>), 2.14 (1H, dd, *J* 14.7, 5.9, 2-H<sub>A</sub>), 1.92 (1H, d, *J* 14.7, 2-H<sub>B</sub>), 1.87-1.79 (1H, m, 9-H<sub>B</sub>), 1.58 (3H, s, C<sub>q</sub>CH<sub>3</sub>). **<sup>13</sup>C NMR** (100 MHz, MeOD-*d*<sub>4</sub>): δ 161.3 (5-C), 91.0 (1-C), 84.2 (8-C), 80.3 (7-C), 65.5 (13-C), 64.4 (11-C), 57.1 (3-C), 46.6 (10-C), 41.9 (NCH<sub>3</sub>), 34.6 (2-C or 9-C), 34.4 (2-C or 9-C), 25.1 (C<sub>q</sub>CH<sub>3</sub>). **IR** *v*<sub>max</sub>(film)/cm<sup>-1</sup> 3245, 2938, 2791, 1750 (CO), 1453, 1382, 1330. **HRMS** (ESI): C<sub>12</sub>H<sub>19</sub>N<sub>2</sub>O<sub>3</sub> [M+H]<sup>+</sup>; calculated 239.1390, found 239.1392.

**(1*R*\*,3*R*\*,7*R*\*,8*R*\*,10*R*\*)-7-Methyl-5-oxo-6,14-dioxa-4,12-diazatetracyclo[6.5.1.0<sup>1,10</sup>.0<sup>3,7</sup>]tetradecane-12-carbaldehyde **F8****

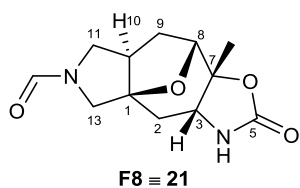

To pre-form acetic formic anhydride, Ac<sub>2</sub>O (0.63 ml, 6.60 mmol) was added to HCO<sub>2</sub>H (0.25 mL, 6.60 mmol) and the reaction mixture was heated at 60 °C for 1 h, then cooled to rt. A 0.1 mL aliquot was added to a stirred solution of **F6** (37 mg, 0.17 mmol, 1.00 eq.) and Et<sub>3</sub>N (0.2 mL, 2.7 mmol, 16.0 eq.) in CH<sub>2</sub>Cl<sub>2</sub> (10 mL) at 0 °C. The reaction mixture was warmed to rt, stirred for 1 h, then concentrated *in vacuo*. Flash chromatography eluting with 29:1:0.1 CH<sub>2</sub>Cl<sub>2</sub>–EtOH–NH<sub>3</sub>/MeOH gave the *title compound* **F8** (18 mg, 71 μmol, 42%) as a colourless oil. *R<sub>f</sub>* 0.47 (29:1:0.1 CH<sub>2</sub>Cl<sub>2</sub>–EtOH–NH<sub>3</sub>/MeOH). <sup>1</sup>H NMR (400 MHz, MeOD-d<sub>4</sub>, NH not observed, two stable conformations observed at the pyrrolidine ring [50:50 mixture]): δ 8.14 (0.5H, s, NCHO), 8.13 (0.5H, s, NCHO), 4.33 (1H, app. t, *J* 7.6, 8-H), 4.02 (0.5H, dd, *J* 11.2, 9.2, 11-H<sub>B-conf1</sub>), 3.94–3.88 (1.5H, m, includes: 1H, 3-H; and 0.5H, 13-H<sub>A-conf1</sub>), 3.80 (0.5H, d, *J* 13.7, 13-H<sub>A-conf2</sub>), 3.73 (0.5H, app. dd, *J* 12.4, 9.7, 11-H<sub>B-conf2</sub>), 3.53 (0.5H, d, *J* 12.5, 13-H<sub>B-conf1</sub>), 3.49–3.37 (1.5H, m, includes: 0.5H, 11-H<sub>A-conf1</sub>; 0.5H, 11-H<sub>A-conf2</sub>; and 0.5H, 13-H<sub>B-conf2</sub>), 3.01–2.87 (1H, m, 10-H), 2.49 (0.5H, dd, *J* 14.2, 8.9, 9-H<sub>A</sub>), 2.40 (0.5H, dd, *J* 14.2, 8.9, 9-H<sub>A</sub>), 2.22 (1H, app. td, *J* 15.1, 6.1, 2-H<sub>A</sub>), 1.98 (1H, dd, *J* 15.1, 3.5, 2-H<sub>B</sub>), 1.97–1.85 (1H, m, 9-H<sub>B</sub>), 1.60 (3H, s, C<sub>q</sub>CH<sub>3</sub>). <sup>13</sup>C NMR (100 MHz, MeOD-d<sub>4</sub>, mixture of two rotamers): δ 163.1 (NCHO), 162.9 (NCHO), 161.3 (2 peaks, 5-C), 89.9 (1-C), 89.4 (1-C), 84.0 (8-C), 83.7 (8-C), 80.0 (7-C), 79.9 (7-C), 56.6 (3-C), 55.6 (2 peaks, 11-C or 13-C), 52.8 (2 peaks, 11-C or 13-C), 45.5 (10-C), 45.1 (10-C), 35.5 (2-C or 9-C), 34.2 (2-C or 9-C), 33.6 (2-C or 9-C), 33.5 (2-C or 9-C), 24.7 (2 peaks, C<sub>q</sub>CH<sub>3</sub>) [23 of 24 expected peaks observed]. IR *v*<sub>max</sub>(film)/cm<sup>-1</sup> 3270, 2936, 2886, 1751 (CO), 1652 (CO), 1429, 1387. HRMS (ESI): C<sub>12</sub>H<sub>17</sub>N<sub>2</sub>O<sub>4</sub> [M+H]<sup>+</sup>; calculated 253.1183, found 253.1184.

**(1R\*,3R\*,7R\*,8R\*,10R\*)-12-acetyl-7-methyl-6,14-dioxa-4,12-diazatetracyclo[6.5.1.0<sup>1,10</sup>.0<sup>3,7</sup>]tetradecan-5-one F9**

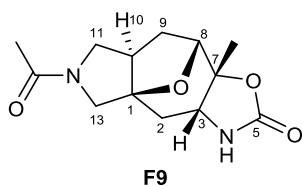

*N*-Acylation was carried out by following general procedure **E**, using compound **F6** (37 mg, 0.17 mmol). Flash chromatography eluting with 98:2:0.1 CH<sub>2</sub>Cl<sub>2</sub>–EtOH–NH<sub>3</sub>/MeOH gave the *title compound* **F9** (31 mg, 0.12 mmol, 68%) as a colourless oil. *R<sub>f</sub>* 0.10 (98:2:0.1 CH<sub>2</sub>Cl<sub>2</sub>–EtOH–NH<sub>3</sub>/MeOH). <sup>1</sup>H NMR (400 MHz, MeOD-d<sub>4</sub>, NH not observed, 50:50 mixture of rotamers): δ 4.34 (1H, d, *J* 7.7, 8-H), 4.03 (0.5H, dd, *J* 10.7, 9.8, 11-H<sub>A</sub>), 3.98–3.80 (2.5H, m, includes: 1H, 3-H; 0.5H, 11-H<sub>A</sub>; and 1H, 13-H<sub>A</sub>), 3.59 (0.5H, d, *J* 12.4, 13-H<sub>B</sub>), 3.43–3.25 (1.5H, m, includes: 1H, 11-H<sub>B</sub>; and 0.5H, 13-H<sub>B</sub>), 3.04–2.84 (1H, m, 10-H), 2.43 (0.5H, app. t, *J* 7.3, 9-H<sub>A</sub>), 2.40 (0.5H, app. t, *J* 7.3, 9-H<sub>A</sub>), 2.23 (0.5H, dd, *J* 6.0, 5.2, 2-H<sub>A</sub>), 2.20 (0.5H, dd, *J* 6.0, 5.2, 2-H<sub>A</sub>), 2.10 (3H, s, Ac), 2.06 (3H, s, N(CO)CH<sub>3</sub>), and 2.02–1.89 (2H, m, 2-H<sub>B</sub> and 9-H<sub>B</sub>). <sup>13</sup>C NMR (100 MHz, MeOD-d<sub>4</sub>, mixture of two rotamers): δ 171.7 (N(CO)CH<sub>3</sub>), 171.6 (N(CO)CH<sub>3</sub>), 161.4 (5-C), 161.3 (5-C), 90.7 (1-C), 89.5 (1-C), 83.8 (8-C), 83.8 (8-C), 80.0 (7-C), 79.9 (7-C), 57.4 (13-C), 57.0 (13-C), 56.5 (3-C), 55.6 (11-C), 55.3 (11-C), 46.2 (10-C), 44.7 (10-C), 34.6 (2-C or 9-C), 34.2 (2-C or 9-C), 34.0 (2-C or 9-C), 33.9 (2-C or 9-C), 24.6 (N(CO)CH<sub>3</sub>), 22.0 (C<sub>q</sub>CH<sub>3</sub>), 21.8 (C<sub>q</sub>CH<sub>3</sub>) [24 of 26 expected peaks observed]. IR *v*<sub>max</sub>(film)/cm<sup>-1</sup> 3259, 2936, 2883, 1746, 1618, 1455, 972. HRMS (ESI): C<sub>13</sub>H<sub>19</sub>N<sub>2</sub>O<sub>4</sub> [M+H]<sup>+</sup>; calculated 267.1339, found 267.1343.

**5.4.3.5 Preparation of fragments derived from scaffold 9**

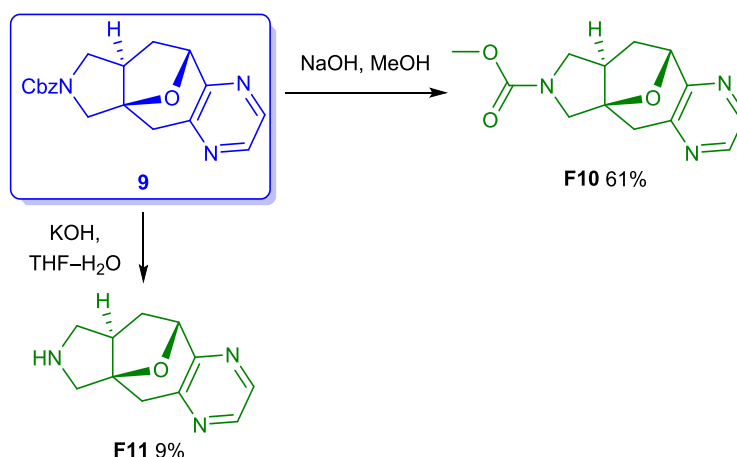

## Methyl (1*R*\*,9*R*\*,11*R*\*)-15-oxa-4,7,13-triazatetracyclo[7.5.1.0<sup>1,11</sup>.0<sup>3,8</sup>]pentadeca-3(8),4,6-triene-13-carboxylate **F10**

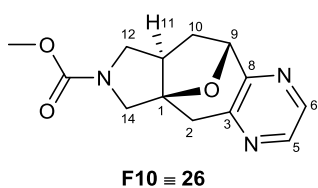

NaOH (250 mg, 6.25 mmol, 21.0 eq.) was added to a stirred solution of compound **9** (100 mg, 0.30 mmol, 1.00 eq.) in MeOH (3.0 mL). The reaction mixture was heated at reflux for 15 h. The reaction mixture was purified by SCX SPE eluting with MeOH, followed by flash chromatography eluting with 98:2:0.1 CH<sub>2</sub>Cl<sub>2</sub>–EtOH–NH<sub>3</sub>/MeOH gave the *title compound* **F10** (48 mg, 0.18 mmol, 61%) as a pale yellow oil. *R<sub>f</sub>* 0.04 (98:2:0.1 CH<sub>2</sub>Cl<sub>2</sub>–EtOH–NH<sub>3</sub>/MeOH). <sup>1</sup>H NMR (400 MHz, CDCl<sub>3</sub>): δ 8.40 (1H, d, *J* 2.4, 5-H or 6-H), 8.29 (1H, d, *J* 2.4, 5-H or 6-H), 5.29 (1H, d, *J* 6.8, 9-H), 4.12–3.96 (1H, m, 12-H<sub>A</sub>), 3.84 (1H, app. t, *J* 10.3, 14-H<sub>A</sub>), 3.71 (3H, s, CO<sub>2</sub>CH<sub>3</sub>), 3.60–3.28 (3H, m, 2-H<sub>A</sub>, 12-H<sub>B</sub> and 14-H<sub>B</sub>), 2.92 (1H, d, *J* 17.5, 2-H<sub>B</sub>), 2.77–2.61 (1H, m, 11-H), 2.46–2.35 (1H, m, 10-H<sub>A</sub>), 2.31–2.18 (1H, m, 10-H<sub>B</sub>). <sup>13</sup>C NMR (100 MHz, CDCl<sub>3</sub>, mixture of two rotamers): δ 155.3 (8-C), 155.2 (N(CO)O), 149.2 (3-C), 143.5 (5-C or 6-C), 141.6 (5-C or 6-C), 91.0 (1-C), 90.1 (1-C), 80.4 (9-C), 54.9 (12-C), 54.6 (12-C), 54.1 (14-C), 54.0 (14-C), 52.6 (NCO<sub>2</sub>CH<sub>3</sub>), 46.6 (11-C), 45.6 (11-C), 43.2 (10-C), 39.4 (2-C) [17 of 26 expected peaks observed]. IR *v*<sub>max</sub>(film)/cm<sup>-1</sup> 2953, 2876, 1696 (CO), 1450, 1390, 1117, 770, 730. HRMS (ESI): C<sub>13</sub>H<sub>16</sub>N<sub>3</sub>O<sub>3</sub> [M+H]<sup>+</sup>; calculated 262.1191, found 262.1187.

## (1*R*\*,9*R*\*,11*R*\*)-15-Oxa-4,7,13-triazatetracyclo[7.5.1.0<sup>1,11</sup>.0<sup>3,8</sup>]pentadeca-3(8),4,6-triene **F11**

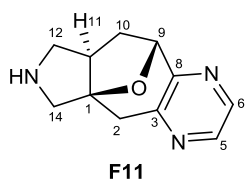

KOH (340 mg, 6.10 mmol, 55.0 eq.) was added to a stirred solution of compound **9** (30 mg, 0.11 mmol, 1.00 eq.) in 7:3 THF–H<sub>2</sub>O (2.4 mL). The reaction mixture was heated at reflux for 2 days. The reaction mixture was concentrated *in vacuo*. The residue was purified by SCX SPE following general procedure **A**, eluting with MeOH, then sat. NH<sub>3</sub>/MeOH, followed by flash chromatography eluting with 50:8:1 CH<sub>2</sub>Cl<sub>2</sub>–EtOH–NH<sub>3</sub>/MeOH to give the *title compound* **F11** (2.0 mg, 9.8 μmol, 9%) as a colourless oil. <sup>1</sup>H NMR (400 MHz, MeOD-*d*<sub>4</sub>, NH not observed): δ 8.46 (1H, d, *J* 2.7, 5-H or 6-H), 8.37 (1H, d, *J* 2.7, 5-H or 6-H), 5.19 (1H, d, *J* 6.4, 9-H), 3.43 (1H, d, *J* 17.4, 2-H<sub>A</sub>), 3.29 (1H, d, *J* 12.7, 14-H<sub>A</sub>), 3.10 (1H, dd, *J* 12.2, 7.7, 12-H<sub>A</sub>), 2.98 (1H, d, *J* 17.4, 2-H<sub>B</sub>), 2.87 (1H, app. d, *J* 12.2, 12-H<sub>B</sub>), 2.79 (1H, d, *J* 12.7, 14-H<sub>B</sub>), 2.62–2.46 (2H, m, 10-H<sub>A</sub> and 11-H), 2.18–2.09 (1H, m, 10-H<sub>B</sub>). <sup>13</sup>C NMR (100 MHz, MeOD-*d*<sub>4</sub>): δ 157.0 (8-C), 151.9 (3-C), 144.3 (5-C or 6-C), 142.6 (5-C or 6-C), 94.1 (1-C), 81.2 (9-C), 56.4 (12-C), 54.9 (14-C), 48.1 (11-C), 44.6 (10-C), 39.5 (2-C). IR *v*<sub>max</sub>(film)/cm<sup>-1</sup> 3244, 3046, 2958, 2868, 1643, 1594, 1397, 1015. HRMS (ESI): C<sub>11</sub>H<sub>14</sub>N<sub>3</sub>O [M+H]<sup>+</sup>; calculated 204.1131, found 204.1127.

### 5.4.3.6 Preparation of fragments derived from scaffold 13

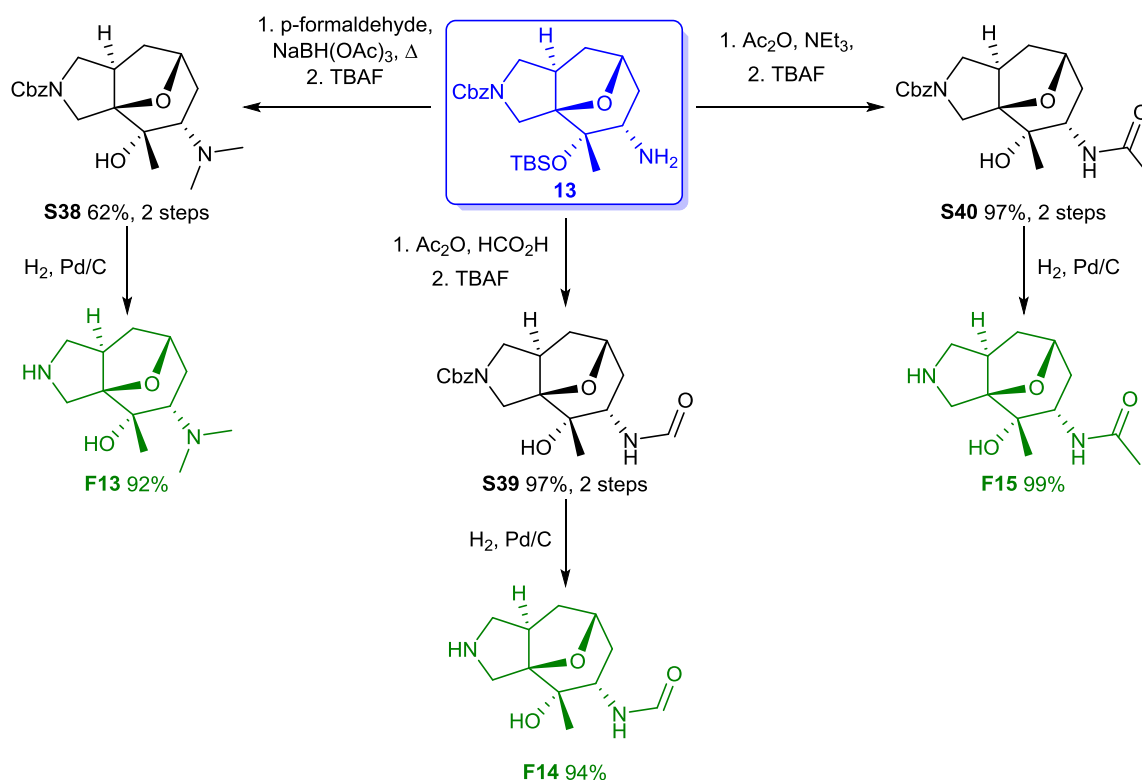

### Benzyl (1*R*\*,5*R*\*,7*R*\*,9*S*\*,10*S*\*)-9-(dimethylamino)-10-hydroxy-10-methyl-11-oxa-3-azatricyclo[5.3.1.0<sup>1,5</sup>]undecane-3-carboxylate **S38**

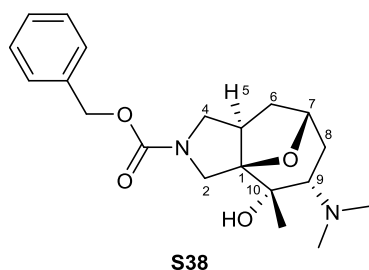

Reductive amination was carried out by following general procedure **C**, using compound **13** (70 mg, 0.16 mmol), p-formaldehyde (5.0 eq.), and NaBH(OAc)<sub>3</sub> (5.0 eq.). The reaction mixture was heated at reflux for 15 h, then cooled to rt. The reaction mixture was partitioned with sat. aq. NaHCO<sub>3</sub> (10 mL). The phases were separated and the aqueous layer was extracted with CH<sub>2</sub>Cl<sub>2</sub> (2 × 10 mL). The combined organic phases

were washed with brine (10 mL), dried over MgSO<sub>4</sub>, filtered, and concentrated *in vacuo*. The residue was diluted in THF (10 mL) and TBAF (1.0 M in THF, 0.32 mL, 0.32 mmol, 2.0 eq.) was added. The reaction mixture was stirred for 0.5 h, then concentrated *in vacuo*. Flash chromatography eluting with 29:1:0.1 CH<sub>2</sub>Cl<sub>2</sub>-EtOH-NH<sub>3</sub>/MeOH gave the *title compound* **S38** (36 mg, 100 μmol, 62%, 2 steps) as a colourless oil. *R*<sub>f</sub> 0.19 (29:1:0.1 CH<sub>2</sub>Cl<sub>2</sub>-EtOH-NH<sub>3</sub>/MeOH). <sup>1</sup>H NMR (400 MHz, CHCl<sub>3</sub>, 50:50 mixture of rotamers, OH not observed) δ 7.41-7.23 (5H, m, Cbz Ar-H), 5.14 (1H, app. d, *J* 14.2, OCH<sub>A</sub>H<sub>B</sub>Ph), 5.08 (1H, app. d, *J* 14.2, OCH<sub>A</sub>H<sub>B</sub>Ph), 4.40 (1H, dd, *J* 11.5, 5.5, 7-H), 3.81-3.66 (1H, m, 4-H<sub>A</sub>), 3.66-3.51 (2H, m, 2-H<sub>A</sub> and 4-H<sub>B</sub>), 3.51-3.35 (1H, m, 2-H<sub>B</sub>), 3.14-2.95 (1H, m, 5-H), 2.48 (1H, dd, *J* 8.6, 3.2, 9-H), 2.36 (6H, s, N(CH<sub>3</sub>)<sub>2</sub>), 2.26-2.10 (2H, m, 6-H<sub>A</sub> and 8-H<sub>B</sub>),

1.80-1.62 (2H, m, 6-H<sub>B</sub> and 8-H<sub>A</sub>), 1.29 (3H, s, C<sub>q</sub>CH<sub>3</sub>). **<sup>13</sup>C NMR** (100 MHz, CHCl<sub>3</sub>, mixture of two rotamers): 155.2 (N(CO)O), 137.1 (Ar-C<sub>q</sub>), 128.5 (Ar-C), 128.0 (2 peaks, Ar-C), 95.2 (1-C), 94.3 (1-C), 76.0 (7-C), 70.0 (10-C), 66.9 (OCH<sub>2</sub>Ph), 65.9 (9-C), 54.2 (4-C), 54.0 (4-C), 52.0 (2-C), 51.5 (2-C), 45.9 (N(CH<sub>3</sub>)<sub>2</sub>), 40.7 (6-C), 39.7 (5-C), 38.8 (5-C), 27.1 (8-C), 26.1 (C<sub>q</sub>CH<sub>3</sub>) [21 of 36 expected peaks observed]. **IR**  $\nu_{\text{max}}$ (film)/cm<sup>-1</sup> 2948, 2875, 1699 (CO), 1419, 1357, 1228, 1114, 1085. **HRMS** (ESI): C<sub>20</sub>H<sub>29</sub>N<sub>2</sub>O<sub>4</sub> [M+H]<sup>+</sup>; calculated 361.2122, found 361.2126.

**Benzyl (1*R*\*,5*R*\*,7*R*\*,9*S*\*,10*S*\*)-9-formamido-10-hydroxy-10-methyl-11-oxa-3-azatricyclo[5.3.1.0<sup>1,5</sup>]undecane-3-carboxylate **S39****

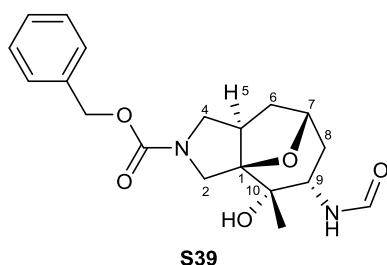

*N*-Formylation was carried out by following general procedure **D**, using compound **13** (31 mg, 70  $\mu$ mol) and Ac<sub>2</sub>O (20 eq.). *O*-Silyl deprotection was carried out by following general procedure **H**, using the crude residue. Flash chromatography eluting with 29:1:0.1 CH<sub>2</sub>Cl<sub>2</sub>-EtOH-NH<sub>3</sub>/MeOH gave the *title compound* **S39** (24 mg, 67  $\mu$ mol, 97%, 2 steps) as a colourless oil. **R<sub>f</sub>** 0.38 (29:1:0.1 CH<sub>2</sub>Cl<sub>2</sub>-EtOH-NH<sub>3</sub>/MeOH). **<sup>1</sup>H NMR** (400 MHz, CHCl<sub>3</sub>, 50:50 mixture of rotamers, OH not observed):  $\delta$  8.19 (1H, d, *J* 3.4, NHCHO), 7.39-7.27 (5H, m, Cbz Ar-H), 6.42 (1H, d, *J* 8.8, CHNHCHO), 5.10 (2H, s, OCH<sub>2</sub>Ph), 4.53 (1H, br. s, 7-H), 3.99-3.77 (3H, m, 2-H<sub>A</sub>, 4-H<sub>A</sub> and 9-H), 3.56 (1H, d, *J* 12.2, 2-H<sub>B</sub>), 3.29-3.08 (2H, m, 4-H<sub>B</sub> and 5-H), 2.28-2.11 (2H, m, 6-H<sub>A</sub>, 8-H<sub>B</sub>), 2.04 (0.5H, d, *J* 15.1, 8-H<sub>A</sub>), 1.98-1.82 (1.5H, m, includes: 1H, 6-H<sub>B</sub>; and at  $\delta$  1.90: 0.5H, d, *J*, 15.1, 8-H<sub>A</sub>), 1.42 (1.5H, s, CH<sub>3</sub>), 1.41 (1.5H, s, CH<sub>3</sub>). **<sup>13</sup>C NMR** (100 MHz, CHCl<sub>3</sub>, mixture of two rotamers, 10-C not observed):  $\delta$  163.0 (NH(CO)H), 162.6 (NH(CO)H), 154.7 (N(CO)O), 136.9 (Ar-C<sub>q</sub>), 128.6 (Ar-C), 128.2 (Ar-C), 128.1 (Ar-C), 128.0 (Ar-C), 94.6 (1-C), 93.7 (1-C), 70.5 (7-C), 69.9 (7-C), 67.1 (OCH<sub>2</sub>Ph), 67.0 (OCH<sub>2</sub>Ph), 55.3 (4-C), 54.9 (4-C), 53.1 (9-C), 52.9 (9-C), 51.2 (2-C), 50.5 (2-C), 40.7 (5-C), 39.5 (5-C), 37.1 (8-C), 36.6 (8-C), 33.9 (6-C), 33.6 (6-C), 25.7 (C<sub>q</sub>CH<sub>3</sub>), 25.5 (C<sub>q</sub>CH<sub>3</sub>) [28 of 34 expected peaks observed]. **IR**  $\nu_{\text{max}}$ (film)/cm<sup>-1</sup> 3317 (OH), 2952, 2886, 1668 (CO), 1423, 1121, 1085, 732. **HRMS** (ESI): C<sub>19</sub>H<sub>25</sub>N<sub>2</sub>O<sub>5</sub> [M+H]<sup>+</sup>; calculated 361.1758, found 361.1760.

**Benzyl (1*R*\*,5*R*\*,7*R*\*,9*S*\*,10*S*\*)-9-acetamido-10-hydroxy-10-methyl-11-oxa-3-azatricyclo[5.3.1.0<sup>1,5</sup>]undecane-3-carboxylate S40**

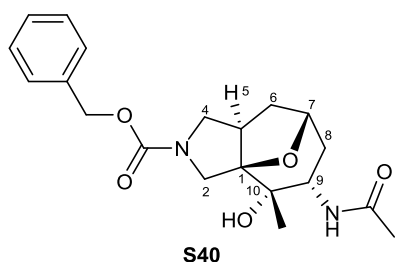

*N*-Acylation was carried out by following general procedure **E**, using compound **13** (90 mg, 0.20 mmol). The reaction mixture was stirred at rt for 10 min, then sat. aq. NH<sub>4</sub>Cl (10 mL) was added. The phases were separated and the aqueous layer was extracted with CH<sub>2</sub>Cl<sub>2</sub> (2 × 10 mL). The combined organic phases were dried over MgSO<sub>4</sub>, filtered, and concentrated *in vacuo*. *O*-Silyl deprotection was carried out by following general procedure **H**, using the crude residue. Flash chromatography eluting with 29:1:0.1 CH<sub>2</sub>Cl<sub>2</sub>–EtOH–NH<sub>3</sub>/MeOH gave the *title compound* **S40** (59 mg, 0.16 mmol, 79%, 2 steps) as a colourless oil. *R*<sub>f</sub> 0.10 (29:1:0.1 CH<sub>2</sub>Cl<sub>2</sub>–EtOH–NH<sub>3</sub>/MeOH). <sup>1</sup>H NMR (400 MHz, CHCl<sub>3</sub>, 50:50 mixture of rotamers): δ 7.41-7.28 (5H, m, Cbz Ar-H), 6.10 (0.5H, app. s, NH), 6.03 (0.5H, app. s, NH), 5.11 (2H, s, OCH<sub>2</sub>Ph), 4.53 (1H, br. s, 7-H), 4.00-3.75 (3H, m, 2-H<sub>A</sub>, 4-H<sub>A</sub> and 9-H), 3.57-3.55 (1H, m, 2-H<sub>B</sub>, includes at δ 3.56: 0.5H, *J* 12.1; and at δ 3.55: 0.5H, *J* 12.1), 3.33-3.01 (3H, m, 4-H<sub>B</sub>, 5-H and OH), 2.34-2.17 (1H, m, 8-H<sub>B</sub>), 2.13 (1H, dd, *J* 13.2, 8.3, 6-H<sub>A</sub>), 2.07-1.92 (4H, m includes: 1H, 6-H<sub>B</sub>; at δ 2.03: 1.5H, s, NH(CO)CH<sub>3</sub>, and at δ 2.01: 1.5H, s, NH(CO)CH<sub>3</sub>), 1.89 (0.5H, d, *J* 15.0, 8-H<sub>A</sub>), 1.78 (0.5H, d, *J* 15.0, 8-H<sub>A</sub>), 1.42 (1.5H, s, C<sub>q</sub>CH<sub>3</sub>), 1.40 (1.5H, s, C<sub>q</sub>CH<sub>3</sub>). <sup>13</sup>C NMR (100 MHz, CHCl<sub>3</sub>, mixture of two rotamers, 10-C not observed): δ 172.4 (NH(CO)CH<sub>3</sub>), 172.0 (NH(CO)CH<sub>3</sub>), 154.7 (N(CO)O), 154.6 (N(CO)O), 136.9 (Ar-C<sub>q</sub>), 136.8 (Ar-C<sub>q</sub>), 128.6 (Ar-C), 128.1 (2 peaks, Ar-C), 127.0 (Ar-C), 94.6 (1-C), 93.7 (1-C), 70.6 (7-C), 70.0 (7-C), 67.0 (OCH<sub>2</sub>Ph), 55.3 (4-C), 54.8 (4-C), 54.1 (9-C), 54.0 (9-C), 51.0 (2-C), 50.5 (2-C), 40.6 (5-C), 39.4 (5-C), 37.3 (6-C), 36.7 (6-C), 34.0 (8-C), 33.6 (8-C), 25.7 (C<sub>q</sub>CH<sub>3</sub>), 25.5 (C<sub>q</sub>CH<sub>3</sub>), 23.7 (NH(CO)CH<sub>3</sub>), 23.6 (NH(CO)CH<sub>3</sub>) [31 of 36 expected peaks observed]. IR ν<sub>max</sub>(film)/cm<sup>-1</sup> 3342 (OH), 2952, 2887, 1683 (CO), 1499, 1422, 1346, 731. HRMS (ESI): C<sub>20</sub>H<sub>27</sub>N<sub>2</sub>O<sub>5</sub> [M+H]<sup>+</sup>; calculated 375.1915, found 375.1916.

**(1*R*\*,5*R*\*,7*R*\*,9*S*\*,10*S*\*)-9-(Dimethylamino)-10-methyl-11-oxa-3-azatricyclo[5.3.1.0<sup>1,5</sup>]undecan-10-ol F13**

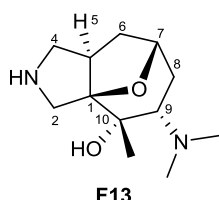

Hydrogenation was carried out following general procedure **B**, using compound **S38** (36 mg, 100 μmol) and Pd/C (5 mg, 15% w/w) in MeOH (10 mL) over 15 h. Filtration followed by concentration gave the *title compound* **F13** (21 mg, 92 μmol, 92%) as a colourless oil. <sup>1</sup>H NMR (400 MHz, MeOD-d<sub>4</sub>, OH and NH not observed): 4.38 (1H, ddd, *J* 8.2, 5.4, 3.1, 7-H), 3.23-3.07 (1H, m, 5-H), 2.94 (1H, d, *J* 12.4, 2-H<sub>A</sub>), 2.90-2.80 (2H, m, 4-H), 2.77 (1H, d, *J* 12.4, 2-H<sub>B</sub>), 2.53 (1H, dd, *J* 9.0, 7.4, 9-H), 2.40 (6H, s, N(CH<sub>3</sub>)<sub>2</sub>), 2.19 (1H, dd, *J* 9.4, 6.2, 6-H<sub>A</sub>), 2.16-2.11 (1H, m, 8-H<sub>B</sub>), 1.63-1.51 (2H, m, 6-H<sub>B</sub> and 8-H<sub>A</sub>),

1.32 (3H, s, C<sub>q</sub>CH<sub>3</sub>). <sup>13</sup>C NMR (100 MHz, MeOD-d<sub>4</sub>): δ 97.7 (1-C), 76.3 (7-C), 73.6 (10-C), 66.3 (9-C), 54.6 (4-C), 53.1 (2-C), 45.2 (NCH<sub>3</sub>)<sub>2</sub>, 42.7 (6-C), 42.1 (5-C), 26.2 (8-C), 25.4 (C<sub>q</sub>CH<sub>3</sub>). IR ν<sub>max</sub>(film)/cm<sup>-1</sup> 3286 (br. OH, NH), 2954, 2871, 2820, 2778, 1647, 1460. HRMS (ESI): C<sub>12</sub>H<sub>22</sub>N<sub>2</sub>NaO<sub>2</sub> [M+Na]<sup>+</sup>; calculated 249.1573, found 249.1573.

**N-[(1R\*,5R\*,7R\*,9S\*,10S\*)-10-Hydroxy-10-methyl-11-oxa-3-azatricyclo[5.3.1.0<sup>1,5</sup>]undecan-9-yl]formamide F14**

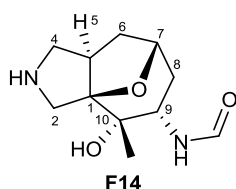

Hydrogenation was carried out following general procedure **B**, using compound **S39** (24 mg, 66 μmol) and Pd/C (5 mg, 20 % w/w) in MeOH (10 mL) over 15 h. Filtration followed by concentration gave the *title compound F14* (14 mg, 62 μmol, 94%) as a colourless oil. <sup>1</sup>H NMR (400 MHz, MeOD-d<sub>4</sub>, OH and 2 × NH not observed): δ 8.11 (1H, d, *J* 0.9, NHCHO), 4.46 (1H, app. t, *J* 5.4, 7-H), 3.89 (1H, dd, *J* 6.4, 1.7, 9-H), 3.21-3.14 (1H, m, 5-H), 3.12 (1H, d, *J* 11.2, 4-H<sub>A</sub>), 3.07 (1H, d, *J* 12.3, 2-H<sub>A</sub>), 2.97 (1H, d, *J* 12.3, 2-H<sub>B</sub>), 2.78 (1H, dd, *J* 11.2, 3.5, 4-H<sub>B</sub>), 2.30 (1H, dd, *J* 12.7, 8.7, 6-H<sub>A</sub>), 2.17 (1H, app. dt, *J* 14.7, 5.6, 8-H<sub>B</sub>), 1.86 (1H, ddd, *J* 14.7, 2.4, 1.9, 8-H<sub>A</sub>), 1.83-1.75 (1H, m, 6-H<sub>B</sub>), 1.41 (3H, s, C<sub>q</sub>CH<sub>3</sub>). <sup>13</sup>C NMR (100 MHz, MeOD-d<sub>4</sub>): δ 164.5 (NH(CO)H), 97.2 (1-C), 77.9 (10-C), 70.5 (7-C), 56.0 (4-C), 53.5 (9-C), 52.1 (2-C), 42.6 (5-C), 38.9 (6-C), 34.8 (8-C), 25.3 (CH<sub>3</sub>).

IR ν<sub>max</sub>(film)/cm<sup>-1</sup> 3294 (br. OH, NH), 2930, 2873, 1661, 1511, 1383, 1167, 1146. HRMS (ESI): C<sub>11</sub>H<sub>19</sub>N<sub>2</sub>O [M+H]<sup>+</sup>; calculated 227.1390, found 227.1287.

**N-[(1R\*,5R\*,7R\*,9S\*,10S\*)-10-hydroxy-10-methyl-11-oxa-3-azatricyclo[5.3.1.0<sup>1,5</sup>]undecan-9-yl]acetamide F15**

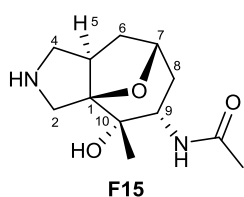

Hydrogenation was carried out following general procedure **B**, using compound **S40** (59 mg, 0.16 mmol) and Pd/C (5 mg, 10% w/w) in MeOH (10 mL) over 15 h. Filtration followed by concentration gave the *title compound F15* (38 mg, 0.16 mol, 99%) as a colourless oil. <sup>1</sup>H NMR (400 MHz, MeOD-d<sub>4</sub>, OH and 2 × NH not observed): δ 4.49 (1H, t, *J* 5.5, 7-H), 3.80 (1H, dd, *J* 6.5, 2.4, 9-H), 3.52-3.41 (3H, m, includes: 1H, 4-H<sub>A</sub>; 1H, 5-H; and at δ: 3.44: 1H, d, *J* 12.3, 2-H<sub>A</sub>), 3.37 (1H, d, *J* 12.3, 2-H<sub>B</sub>), 3.19-3.10 (1H, m, 4-H<sub>B</sub>), 2.42 (1H, dd, *J* 12.8, 8.2, 6-H<sub>A</sub>), 2.14 (1H, dt, *J* 14.7, 5.7, 8-H<sub>B</sub>), 2.02 (3H, s, NH(CO)CH<sub>3</sub>), 1.92-1.87 (1H, m, 6-H<sub>B</sub>), 1.87-1.80 (1H, m, 8-H<sub>A</sub>), 1.38 (3H, s, C<sub>q</sub>CH<sub>3</sub>).

<sup>13</sup>C NMR (100 MHz, MeOD-d<sub>4</sub>): δ 174.6 (NH(CO)CH<sub>3</sub>), 95.0 (1-C), 77.9 (10-C), 70.4 (7-C), 54.5 (9-C), 54.3 (4-C), 50.7 (2-C), 40.5 (5-C), 38.9 (6-C), 34.1 (8-C), 25.5 (C<sub>q</sub>CH<sub>3</sub>), 22.8 (NH(CO)CH<sub>3</sub>). IR ν<sub>max</sub>(film)/cm<sup>-1</sup> 3333 (br. OH, NH), 2967, 2773, 1642, 1526, 1436, 1376, 1098. HRMS (ESI): C<sub>12</sub>H<sub>21</sub>N<sub>2</sub>O<sub>3</sub> [M+H]<sup>+</sup>; calculated 241.1547, found 241.1549.



### 5.4.3.7 Preparation of fragments derived from scaffold 14

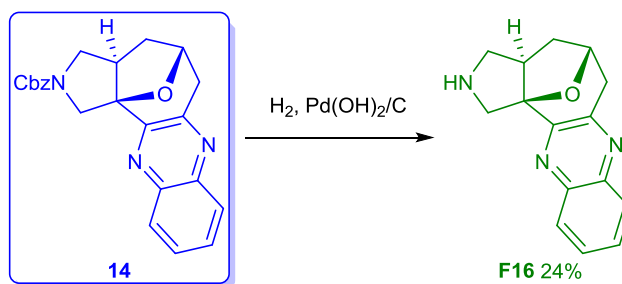

### (1*R*\*,13*R*\*,15*R*\*)-19-oxa-3,10,17-triazapentacyclo[11.5.1.0<sup>1,15</sup>.0<sup>2,11</sup>.0<sup>4,9</sup>]nonadeca-2(11),3,5,7,9-pentaene **F16**

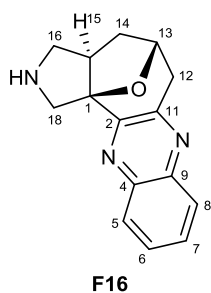

Hydrogenation was carried out following general procedure **B**, using compound **14** (281 mg, 0.73 mmol) and Pd(OH)<sub>2</sub>/C (60 mg, 10% w/w) in MeOH (10 mL) over 15 h. Flash chromatography eluting with 93:7:1 CH<sub>2</sub>Cl<sub>2</sub>–EtOH–NH<sub>3</sub>/MeOH, then 50:8:1 CH<sub>2</sub>Cl<sub>2</sub>–EtOH–NH<sub>3</sub>/MeOH, gave the *title compound* **F16** (44 mg, 0.17 mmol, 24%) as a colourless oil. \* *R<sub>f</sub>* 0.35 (50:8:1 CH<sub>2</sub>Cl<sub>2</sub>–EtOH–NH<sub>3</sub>/MeOH). <sup>1</sup>H NMR (500 MHz, CDCl<sub>3</sub>, NH not observed):

δ 8.04–7.93 (1H, m, 5-H and 8-H), 7.72–7.66 (1H, m, 6-H and 7-H), 5.05 (1H, app. t, *J* 7.1, 13-H), 4.13 (1H, d, *J* 12.9, 18-H<sub>B</sub>), 3.69 (1H, ddd, *J* 18.4, 6.8, 1.4, 16-H<sub>B</sub>), 3.38 (1H, d, *J* 12.9, 18-H<sub>A</sub>), 3.32 (1H, dd, *J* 11.8, 8.1, 12-H<sub>B</sub>), 2.97 (1H, d, *J* 18.4, 16-H<sub>A</sub>), 2.85 (1H, dd, *J* 11.8, 5.1, 12-H<sub>A</sub>), 2.80–2.73 (1H, m, 15-H), 2.27 (1H, dd, *J* 13.0, 9.0, 14-H<sub>A</sub>), 2.17–2.10 (1H, m, 14-H<sub>B</sub>). <sup>13</sup>C NMR (125 MHz, CDCl<sub>3</sub>): 154.9 (Ar-C<sub>q</sub>), 151.4 (Ar-C<sub>q</sub>), 142.0 (Ar-C<sub>q</sub>), 140.4 (Ar-C<sub>q</sub>), 129.6 (Ar-C), 129.4 (Ar-C), 129.3 (Ar-C), 128.5 (Ar-C), 95.0 (1-C), 76.9 (13-C), 55.9 (18-C), 54.5 (15-C), 52.0 (16-C), 39.6 (12-C), 39.5 (14-C). IR *v*<sub>max</sub>(film)/cm<sup>-1</sup> 2953, 2869, 1489, 1318, 1184, 1136, 763. HRMS (ESI): C<sub>15</sub>H<sub>16</sub>N<sub>3</sub>O [M+H]<sup>+</sup>; calculated 254.1288, found 254.1276.

\* N.b. another product was observed through analysis of the crude residue by NMR spectroscopy at 300 MHz and by LRMS. This was postulated to be an alcohol resulting from hydrogenolytic cleavage of the ether (HPLC-MS: C<sub>15</sub>H<sub>18</sub>N<sub>3</sub>O; found 255.9 [M+H]<sup>+</sup>). However, we were unable to cleanly isolate this material.

### 5.4.3.8 Preparation of fragments derived from scaffold 15

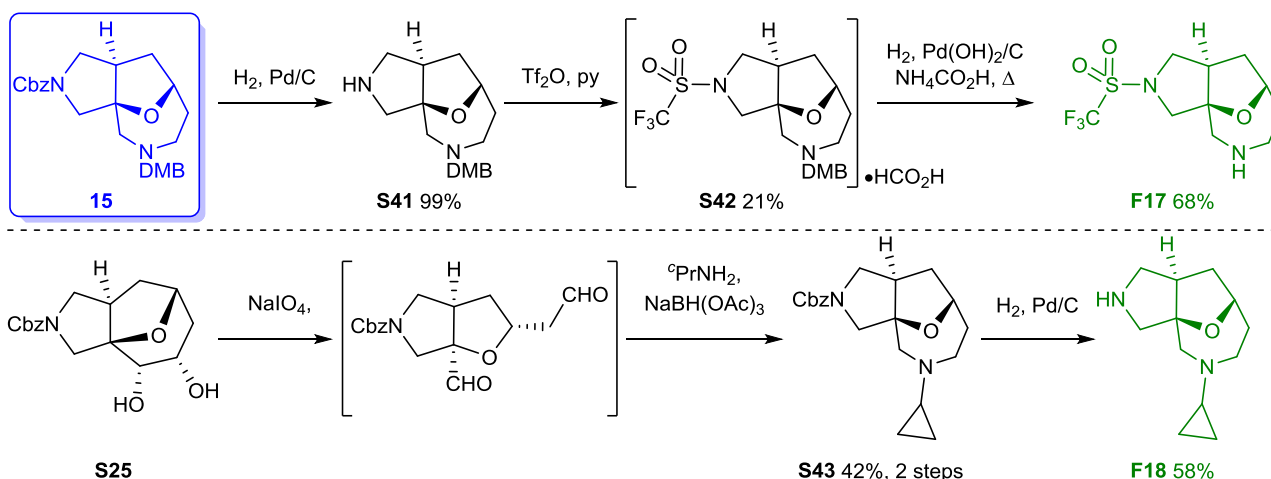

### (1*R*\*,5*R*\*,7*R*\*)-10-[(2,4-dimethoxyphenyl)methyl]-12-oxa-3,10-diazatricyclo[5.4.1.0<sup>1,5</sup>]dodecane S41

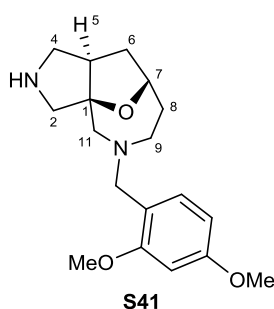

Hydrogenation was carried out following general procedure **B**, using compound **15** (396 mg, 0.88 mmol) and Pd/C (40 mg, 10% w/w) in MeOH (25 mL) over 15 h. Filtration followed by concentration gave the *title compound* **S41** (278 mg, 0.87 mmol, 99%) as a colourless amorphous solid. **<sup>1</sup>H NMR** (500 MHz,  $\text{CDCl}_3$ ):  $\delta$  7.32 (1H, d,  $J$  8.2, DMB 6-H), 6.48 (1H, dd,  $J$  8.2, 2.4, DMB 5-H), 6.45 (1H, d,  $J$  2.4, DMB 3-H), 4.50 (1H, app. t,  $J$  7.8, 7-H), 3.81 (3H, s,  $\text{OCH}_3$ ), 3.79 (3H, s,  $\text{OCH}_3$ ), 3.64 (2H, s,  $\text{NCH}_2\text{Ar}$ ),

3.05 (1H, d,  $J$  12.3, 2- $\text{H}_A$ ), 2.94 (1H, dd,  $J$  11.7, 7.3, 4- $\text{H}_B$ ), 2.79 (1H, d,  $J$  11.7, 4- $\text{H}_A$ ), 2.76-2.67 (2H, m, includes: 1H, 5-H; and at  $\delta$  2.69: 1H, d,  $J$  12.2, 11- $\text{H}_A$ ), 2.67-2.56 (3H, m, 9-H and 11- $\text{H}_B$ ), 2.47 (1H, d,  $J$  12.3, 2- $\text{H}_A$ ), 2.16-2.10 (1H, m, 6- $\text{H}_A$ ), 2.03-1.95 (1H, m, 8- $\text{H}_B$ ), 1.82 (1H, app. dt,  $J$  12.2, 7.2, 6- $\text{H}_B$ ), 1.52-1.43 (1H, m, 8- $\text{H}_A$ ). **<sup>13</sup>C NMR** (125 MHz,  $\text{CDCl}_3$ , DMB 1-C not observed):  $\delta$  159.9 (DMB 2-C or 4-C), 158.8 (DMB 2-C or 4-C), 130.7 (DMB 6-C), 104.2 (DMB 5-C), 98.6 (DMB 3-C), 96.2 (1-C), 77.6 (7-C), 62.8 (11-C), 57.8 (2-C), 56.4 ( $\text{NCH}_2\text{Ar}$ ), 55.5 (3 peaks, 2  $\times$   $\text{OCH}_3$  and 4-C), 51.4 (9-C), 47.7 (5-C), 43.0 (6-C), 37.1 (8-C). **IR**  $\nu_{\text{max}}(\text{film})/\text{cm}^{-1}$  2933, 2833, 1612, 1588, 1505, 1456, 1290, 1207. **HRMS** (ESI):  $\text{C}_{18}\text{H}_{26}\text{N}_2\text{O}_3$  [ $\text{M}+\text{H}$ ]<sup>+</sup>; calculated 319.2016, found 319.2016.

**(1S\*,5R\*,7R\*)-10-[(2,4-dimethoxyphenyl)methyl]-3-trifluoromethanesulfonyl-12-oxa-3,10-diazatricyclo[5.4.1.0<sup>1,5</sup>]dodecane formate **S42****

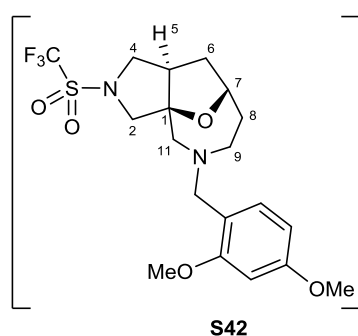

Tf<sub>2</sub>O (0.14 mL, 0.83 mmol, 2.00 eq.) was added to a stirred solution of compound **S41** (130 mg, 0.41 mmol, 1.00 eq.) in pyridine (5 mL) at 0 °C. The reaction mixture was warmed to rt then stirred for 2 h. The reaction mixture was concentrated *in vacuo*, then partitioned between EtOAc (25 mL) and sat. aq. NaHCO<sub>3</sub> solution (25 mL). The phases were separated and the aqueous phase was extracted with EtOAc (2 × 25 mL). The

combined organic phases were dried over MgSO<sub>4</sub>, filtered and concentrated *in vacuo*. Purification by mass directed liquid chromatography (binary gradient of MeOH and H<sub>2</sub>O containing 0.1% HCO<sub>2</sub>H) gave the *title compound* **S42** (43 mg, 87 μmol, 21%) as a bright yellow oil. *R<sub>f</sub>* 0.41 (29:1:0.1 CH<sub>2</sub>Cl<sub>2</sub>–EtOH–NH<sub>3</sub>/MeOH). **<sup>1</sup>H NMR** (500 MHz, MeOD-*d*<sub>4</sub>): δ 8.24 (2H, s, HCO<sub>2</sub>H and HCO<sub>2</sub>H), 7.36 (1H, d, *J* 6.9, DMB 6-H), 6.62 (1H, d, *J* 1.9, DMB 3-H), 6.58 (1H, d, *J* 6.9, DMB 5-H), 4.72–4.60 (1H, m, 7-H), 4.28 (2H, s, CH<sub>2</sub>Ar), 3.87 (3H, s, OCH<sub>3</sub>), 3.84–3.79 (4H, m, includes: 1H, 2-H<sub>A</sub>; and at δ 3.81: 3H, s, OCH<sub>3</sub>), 3.75–3.68 (1H, m, 4-H<sub>A</sub>), 3.52 (1H, d, *J* 10.5, 4-H<sub>B</sub>), 3.48–3.37 (3H, m, 9-H and 11-H<sub>A</sub>), 3.34 (1H, d, *J* 10.5, 2-H<sub>B</sub>), 3.31–3.21 (1H, m, 11-H<sub>B</sub>), 3.13–3.02 (1H, m, 5-H), 2.31–2.17 (2H, m, includes: 1H, 8-H<sub>B</sub>; and at δ 2.27: 1H, dd, *J* 12.4, 9.2, 6-H<sub>A</sub>), 2.08–1.98 (1H, m, 6-H<sub>B</sub>), 1.73 (1H, d, *J* 13.5, 8-H<sub>A</sub>). **<sup>13</sup>C NMR** (125 MHz, MeOD-*d*<sub>4</sub>): δ 166.7 (HCO<sub>2</sub>H), 164.3 (DMB 2-C or 4-C), 161.1 (DMB 2-C or 4-C), 135.0 (DMB 6-C), 121.5 (q, *J* 322.0, CF<sub>3</sub>), 111.5 (DMB 1-C), 106.7 (DMB 5-C), 99.7 (DMB 3-C), 91.1 (1-C), 80.5 (7-C), 60.2 (11-C), 58.6 (2-C), 57.4, (4-C and NCH<sub>2</sub>Ar), 56.3 (OCH<sub>3</sub>), 56.0 (OCH<sub>3</sub>), 51.5 (9-C), 50.5 (5-C), 39.3 (6-C), 33.7 (8-C). **IR** *v*<sub>max</sub>(film)/cm<sup>-1</sup> 1711, 1612, 1586, 1510, 1458, 1384, 1294, 1188. **HRMS** (ESI): C<sub>19</sub>H<sub>26</sub>F<sub>3</sub>N<sub>2</sub>O<sub>5</sub>S [M+H]<sup>+</sup>; calculated 451.1509, found 451.1520.

**(1S\*,5R\*,7R\*)-3-Trifluoromethanesulfonyl-12-oxa-3,10-diazatricyclo[5.4.1.0<sup>1,5</sup>]dodecane **F17****

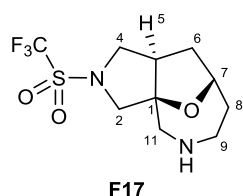

To a stirred solution of compound **S42** (31 mg, 69 μmol, 1.0 eq.) in EtOH (2 mL) was added conc. HCl (12 M, 0.1 mL), 20 wt% Pd(OH)<sub>2</sub>/C (15 mg, 50% w/w) and NH<sub>4</sub>CO<sub>2</sub>H (88 mg, 1.4 mmol, 10 eq.). The reaction mixture was heated for 24 h, then filtered through a pad of Celite eluting with EtOH and concentrated *in vacuo*.

Purification by SCX SPE following general procedure **A**, eluting with MeOH, then sat. NH<sub>3</sub>/MeOH, gave the *title compound* **F17** (14 mg, 47 μmol, 68%) as a colourless oil. **<sup>1</sup>H NMR** (400 MHz, CDCl<sub>3</sub>): δ 4.72–4.66 (1H, m, 7-H), 3.83–3.70 (2H, m, includes: 1H, 4-H<sub>A</sub>; and at δ 3.76: 1H, d, *J* 11.4, 2-H<sub>A</sub>), 3.41 (1H, dd, *J* 10.5, 6.1, 4-H<sub>B</sub>), 3.34 (1H, d, *J* 11.4, 2-H<sub>B</sub>),

3.01-2.88 (4H, m, includes: 2H, 9-H; and at  $\delta$  2.94: 2H, 11-H, s), 2.88-2.78 (1H, m, 5-H), 2.25-2.15 (1H, m, 6-H<sub>A</sub>), 2.13-1.96 (3H, m, 6-H<sub>B</sub> and 8-H<sub>A</sub> and NH), 1.64-1.55 (1H, m, 8-H<sub>B</sub>). **<sup>13</sup>C NMR** (100 MHz, CDCl<sub>3</sub>):  $\delta$  120.4 (q,  $J$  323.4, CF<sub>3</sub>), 94.7 (1-C), 78.3 (7-C), 57.2 (2-C), 56.4 (11-C), 55.9 (4-C), 47.1 (5-C), 45.7 (9-C), 40.3 (6-C), 38.3 (8-C). **IR**  $\nu_{\text{max}}$ (film)/cm<sup>-1</sup> 2936, 1385, 1290, 1227, 1186, 1149, 629, 589. **HRMS** (ESI): C<sub>10</sub>H<sub>16</sub>F<sub>3</sub>N<sub>2</sub>O<sub>3</sub>S [M+H]<sup>+</sup>; calculated 301.0828, found 301.0831.

### Benzyl (1*S*\*,5*R*\*,7*R*\*)-10-cyclopropyl-12-oxa-3,10-diazatricyclo[5.4.1.0<sup>1,5</sup>]dodecane-3-carboxylate **S43**

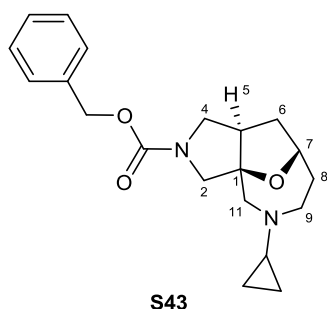

NaIO<sub>4</sub> (188 mg, 0.880 mmol, 2.00 eq.) was added to a stirred solution of diol **S25** (140 mg, 0.44 mmol, 1.00 eq.) in 2:1 MeOH–H<sub>2</sub>O (7.5 mL) at 0 °C. The reaction mixture was warmed to rt and stirred for 15 h. The reaction mixture was concentrated *in vacuo*, then diluted in CH<sub>2</sub>Cl<sub>2</sub> (10 mL) and washed with brine (10 mL). The phases were separated and the aqueous layer was extracted with CH<sub>2</sub>Cl<sub>2</sub> (3 × 10 mL). The resulting crude dialdehyde was dissolved in CH<sub>2</sub>Cl<sub>2</sub> (5 mL), and cyclopropylamine (29  $\mu$ L, 0.42 mmol, 1.30 eq.) and NaBH(OAc)<sub>3</sub> (176 mg, 0.83 mmol, 2.60 eq.) were added. The reaction mixture was stirred for 15 h then filtered through Celite and concentrated *in vacuo*. The resulting residue was diluted in EtOAc (10 mL) and washed with brine (10 mL). The aqueous phase was extracted with EtOAc (2 × 10 mL). The combined organic phase was dried over MgSO<sub>4</sub>, filtered and concentrated *in vacuo*. Flash chromatography eluting with 2:3 pentane–EtOAc gave the *title compound* **S43** (46 mg, 0.13 mmol, 42%, 2 steps) as a colourless oil.  $R_f$  0.55 (1:1 petrol–EtOAc). **<sup>1</sup>H NMR** (500 MHz, CDCl<sub>3</sub>, mixture of rotamers):  $\delta$  7.38-7.27 (5H, m, Cbz Ar-H), 5.11 (2H, s, OCH<sub>2</sub>Ph), 4.58 (1H, app. td,  $J$  8.0, 3.7, 7-H), 3.76 (1H, dd,  $J$  11.0, 9.1, 4-H<sub>B</sub>), 3.68 (1H, d,  $J$  12.2, 2-H<sub>A</sub>), 3.34 (0.5H, d,  $J$  12.2, 2-H<sub>B</sub>), 3.28 (0.5H, d,  $J$  12.2, 2-H<sub>B</sub>), 3.26-3.13 (1H, m, 4-H<sub>A</sub>), 2.97 (1H, dd,  $J$  12.9, 6.5, 9-H<sub>A</sub>), 2.86 (1H, d,  $J$  12.2, 11-H<sub>A</sub>), 2.79-2.64 (2H, m, 9-H<sub>B</sub> and 11-H<sub>B</sub>), 2.55 (1H, app. qd,  $J$  8.1, 3.3, 5-H), 2.09-2.00 (2H, m, 6-H), 2.00-1.92 (1H, m, 8-H<sub>B</sub>), 1.92-1.85 (1H, m, cyclopropyl CH), 1.49 (1H, ddd,  $J$  13.5, 11.2, 6.7, 8-H<sub>A</sub>), 0.49-0.38 (3H, m, cyclopropyl (CH<sub>A</sub>H<sub>B</sub>)<sub>A</sub> and (CH<sub>2</sub>)<sub>B</sub>), 0.30-0.24 (1H, m, cyclopropyl (CH<sub>A</sub>H<sub>B</sub>)<sub>A</sub>). **<sup>13</sup>C NMR** (125 MHz, CDCl<sub>3</sub>, 329 K, mixture of two rotamers, 1 Ar-C not observed):  $\delta$  154.8 (N(CO)O), 137.3 (Ar-C<sub>q</sub>), 128.6 (Ar-C), 128.0 (Ar-C), 93.4 (1-C), 77.8 (7-C), 66.9 (OCH<sub>2</sub>Ph), 64.7 (11-C), 55.2 (2-C), 53.6 (4-C or 9-C), 53.2 (4-C or 9-C), 46.0 (5-C), 41.0 (6-C), 40.1 (cyclopropyl CH), 37.1 (8-C), 8.2 (cyclopropyl (CH<sub>2</sub>)<sub>A</sub>), 7.4 (cyclopropyl (CH<sub>2</sub>)<sub>B</sub>) [17 of 34 expected peaks observed]. **IR**  $\nu_{\text{max}}$ (film)/cm<sup>-1</sup> 2933, 1701 (CO), 1450, 1415, 1364, 1350, 1121, 1089. **HRMS** (ESI): C<sub>20</sub>H<sub>27</sub>N<sub>2</sub>O<sub>3</sub> [M+H]<sup>+</sup>; calculated 343.2016, found 343.2021.

### (1*R*\*,5*R*\*,7*R*\*)-10-cyclopropyl-12-oxa-3,10-diazatricyclo[5.4.1.0<sup>1,5</sup>]dodecane **F18**

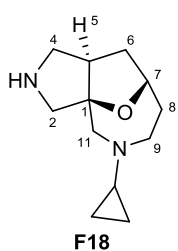

Hydrogenation was carried out following general procedure **B**, using compound **S43** (34 mg, 100  $\mu\text{mol}$ ) and Pd/C (5 mg, 10% w/w) in MeOH (10 mL) over 15 h. Flash chromatography eluting with 98:2:0.1  $\text{CH}_2\text{Cl}_2$ -EtOH- $\text{NH}_3$ /MeOH gave the *title compound* **F18** (12 mg, 58  $\mu\text{mol}$ , 58%) as a colourless oil.  $R_f$  0.42 (98:2:0.1  $\text{CH}_2\text{Cl}_2$ -EtOH- $\text{NH}_3$ /MeOH).  $^1\text{H NMR}$  (400 MHz, MeOD- $d_4$ , NH not observed): 4.50 (1H, app. t,  $J$  7.6, 7-H), 2.99 (1H, d,  $J$  13.2, 11- $\text{H}_A$ ), 3.96-2.86 (2H, m, 4- $\text{H}_A$  and 9- $\text{H}_A$ ), 2.86-2.72 (4H, m, 2-H, 4- $\text{H}_B$ , 9- $\text{H}_B$ ), 2.67 (1H, app. dd,  $J$  14.3, 7.2, 5-H), 2.53 (1H, app. t,  $J$  14.0, 11- $\text{H}_B$ ), 2.14-1.94 (3H, m, 6- $\text{H}_A$ , 8- $\text{H}_A$  and cyclopropyl CH), 1.94-1.84 (1H, m, 6- $\text{H}_B$ ), 1.53-1.42 (1H, m, 8- $\text{H}_B$ ), 0.56-0.43 (3H, m, cyclopropyl ( $\text{CH}_A\text{H}_B$ ) $_A$  and ( $\text{CH}_2$ ) $_B$ ), 0.43-0.33 (1H, m, cyclopropyl ( $\text{CH}_A\text{H}_B$ ) $_A$ ).  $^{13}\text{C NMR}$  (100 MHz, MeOD- $d_4$ , 1-C not observed):  $\delta$  79.5 (7-C), 63.7 (11-C), 58.0 (2-C), 55.8 (4-C and 9-C), 52.7 (5-C), 42.6 (6-C), 40.4 (cyclopropyl CH), 37.6 (8-C), 8.0 (cyclopropyl  $\text{CH}_2$ ), 7.5 (cyclopropyl  $\text{CH}_2$ ). IR  $\nu_{\text{max}}$ (film)/ $\text{cm}^{-1}$  2925, 2853, 1650, 1450, 1365, 1035, 1015, 827. HRMS (ESI):  $\text{C}_{12}\text{H}_{21}\text{N}_2\text{O}$  [ $\text{M}+\text{H}$ ] $^+$ ; calculated 209.1648, found 209.1644.

#### 5.4.3.9 Preparation of fragments derived from scaffold 16

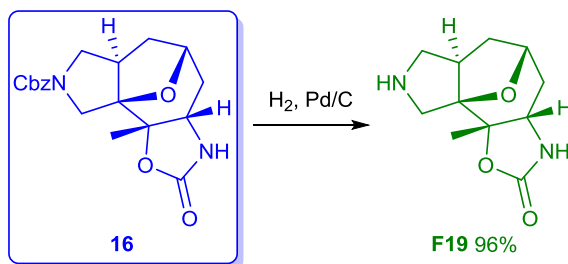

### (1*R*\*,2*S*\*,8*R*\*,10*R*\*)-2-Methyl-3,14-dioxa-5,12-diazatetracyclo[6.5.1.0<sup>1,10</sup>.0<sup>2,6</sup>]tetradecan-4-one **F19**

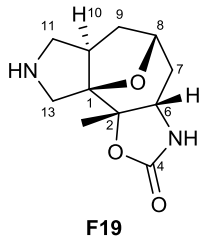

Hydrogenation was carried out following general procedure **B**, using compound **16** (20 mg, 56  $\mu\text{mol}$ ) and Pd/C (5 mg, 25% w/w) in MeOH (10 mL) over 15 h. Filtration followed by concentration gave the *title compound* **F19** (12 mg, 54  $\mu\text{mol}$ , 96%) as a colourless oil.  $^1\text{H NMR}$  (400 MHz, MeOD- $d_4$ , 2  $\times$  NH not observed):  $\delta$  4.60-4.52 (1H, app. t,  $J$  6.5, 8-H), 3.86 (1H, d,  $J$  6.6, 6-H), 3.16-3.08 (2H, m, 11- $\text{H}_A$  and 13- $\text{H}_A$ ), 2.90 (1H, d,  $J$  12.5, 13- $\text{H}_B$ ), 2.88-2.79 (2H, m, 11- $\text{H}_B$  and 10-H), 2.33 (1H, dd,  $J$  12.5, 8.7, 9- $\text{H}_A$ ), 2.17 (1H, dt,  $J$  15.1, 6.2, 7- $\text{H}_B$ ), 1.96-1.88 (1H, m, 9- $\text{H}_B$ ), 1.79 (1H, d,  $J$  15.1, 7- $\text{H}_A$ ), 1.58 (3H, s,  $\text{CH}_3$ ).  $^{13}\text{C NMR}$  (100 MHz, MeOD- $d_4$ ):  $\delta$  161.4 (4-C), 95.7 (1-C), 81.5 (2-C), 77.2 (8-C), 57.4 (6-C), 56.1 (11-C), 52.5 (13-C), 43.2 (10-C), 39.7 (9-C), 33.2 (7-C), 21.9 ( $\text{CH}_3$ ).

IR  $\nu_{\text{max}}$ (film)/ $\text{cm}^{-1}$  3260 (NH), 2927, 2874, 1752 (CO), 1384, 1290, 1111, 961.

HRMS (ESI):  $\text{C}_{11}\text{H}_{17}\text{N}_2\text{O}_3$   $[\text{M}+\text{H}]^+$ ; calculated 225.1234, found 225.1232.

#### 5.4.3.10 Preparation of fragments derived from scaffold 17

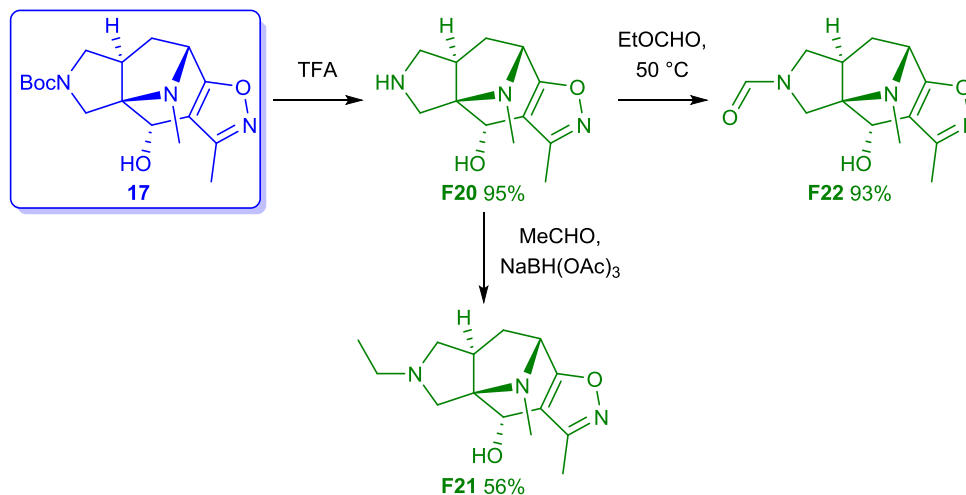

#### (1*R*\*,2*S*\*,8*R*\*,10*R*\*)-4,14-Dimethyl-6-oxa-5,12,14-triazatetracyclo[6.5.1.0<sup>1,10</sup>.0<sup>3,7</sup>]tetradeca-3(7),4-dien-2-ol F20

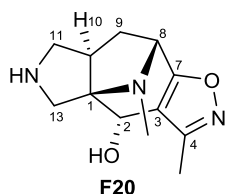

Deprotection of Boc-protected compound **17** (431 mg, 1.28 mmol) was carried out by following general procedure I. Purification by SCX SPE, following eluting with MeOH, then sat.  $\text{NH}_3/\text{MeOH}$ , gave the *title compound* **F20** (288 mg, 1.22 mmol, 95%) as a yellow oil. **<sup>1</sup>H NMR** (400 MHz, MeOD- $d_4$ ):  $\delta$  4.95 (1H, s, 2-H), 4.14 (1H, d,  $J$  5.4, 8-H), 2.97 (1H, dd,  $J$  11.1, 8.2, 11- $\text{H}_A$ ), 2.95 (1H, d,  $J$  12.4, 13- $\text{H}_A$ ), 2.93-2.79 (2H, m, 10-H and 11- $\text{H}_B$ ), 2.84 (1H, d,  $J$  12.4, 13- $\text{H}_B$ ), 2.36 (3H, s,  $\text{C}_q\text{CH}_3$  or  $\text{NCH}_3$ ), 2.33 (3H, s,  $\text{C}_q\text{CH}_3$  or  $\text{NCH}_3$ ), 2.16 (1H, dd,  $J$  11.9, 8.6, 9- $\text{H}_A$ ), 1.90 (1H, app. dt,  $J$  11.9, 5.8, 9- $\text{H}_B$ ). **<sup>13</sup>C NMR** (100 MHz, MeOD- $d_4$ ):  $\delta$  171.1, 158.3, 112.3, 77.3, 62.4, 61.2, 53.4, 48.3, 41.9, 38.2, 30.4, 9.0. IR  $\nu_{\text{max}}$ (film)/ $\text{cm}^{-1}$  3316, 1633, 1451. HRMS (ESI):  $\text{C}_{12}\text{H}_{18}\text{N}_3\text{O}_2$   $[\text{M}+\text{H}]^+$ ; calculated 236.1394, found 236.1392.

#### (1*R*\*,2*S*\*,8*R*\*,10*R*\*)-12-Ethyl-4,14-dimethyl-6-oxa-5,12,14-triazatetracyclo[6.5.1.0<sup>1,10</sup>.0<sup>3,7</sup>]tetradeca-3(7),4-dien-12-ol F21

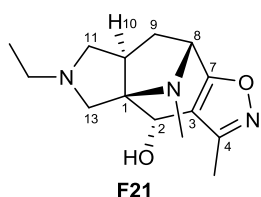

Reductive amination was carried out by following general procedure C, using compound **F20** (89 mg, 0.38 mmol) and acetaldehyde (5.0 M in THF, 2.0 eq.). The reaction was quenched with  $\text{H}_2\text{O}$  (5 mL) and the phases separated. The aqueous phase was extracted with  $\text{CH}_2\text{Cl}_2$  (2 x 10 mL) and the combined organic phases were dried, filtered and concentrated *in vacuo* to give a crude oil. The crude material

was purified by SCX SPE eluting with MeOH, then sat.  $\text{NH}_3/\text{MeOH}$ , to give the *title compound F21* (56 mg, 0.21 mmol, 56%) as a yellow oil.  $^1\text{H NMR}$  (500 MHz,  $\text{MeOD-d}_4$ , 333 K):  $\delta$  4.90 (1H, s, 2-H), 4.09 (1H, d,  $J$  5.4, 8-H), 3.53 (1H, d,  $J$  11.9, 13- $\text{H}_\text{A}$ ), 3.35 (1H, dd,  $J$  11.6, 3.7, 11- $\text{H}_\text{A}$ ), 3.25 (1H, dd,  $J$  11.6, 9.6, 11- $\text{H}_\text{B}$ ), 3.22-3.09 (4H, m, 10-H, 13- $\text{H}_\text{B}$  and  $\text{NCH}_2\text{CH}_3$ ), 2.28 (3H, s,  $\text{NCH}_3$ ), 2.22 (3H, s,  $\text{C}_\text{q}\text{CH}_3$ ), 2.09 (1H, dd,  $J$  12.1, 9.1, 9- $\text{H}_\text{A}$ ), 1.96 (1H, app. dt, 12.1, 6.0, 9- $\text{H}_\text{B}$ ), 1.26 (3H, t,  $J$  7.3,  $\text{NCH}_2\text{CH}_3$ ).  $^{13}\text{C NMR}$  (125 MHz,  $\text{MeOD-d}_4$ , 333 K):  $\delta$  171.4, 159.8, 112.7, 76.0, 62.9, 62.0, 60.7, 55.6, 51.0, 40.4, 39.0, 31.5, 10.8, 10.2. **IR**  $\nu_{\text{max}}$ (film)/ $\text{cm}^{-1}$  3373, 2932, 1681, 1453, 1404, 1365, 1166, 1124. **HRMS** (ESI):  $\text{C}_{14}\text{H}_{22}\text{N}_3\text{O}_2$   $[\text{M}+\text{H}]^+$ ; calculated 264.1712, found 264.1718.

**(1*R*\*,2*S*\*,8*R*\*,10*R*\*)-2-Hydroxy-4,14-dimethyl-6-oxa-5,12,14-triazatetracyclo[6.5.1.0<sup>1,10</sup>.0<sup>3,7</sup>]tetradeca-3(7),4-diene-12-carbaldehyde F22**

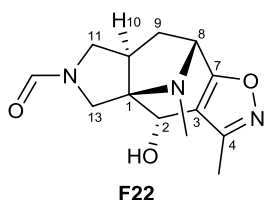

To a solution of compound **F20** (95 mg, 0.40 mmol) in MeOH (1.0 mL) was added ethyl formate (1.0 mL) and the resulting solution was heated to 50 °C for 24 h. The solution was concentrated *in vacuo* to give the *title compound F22* (99 mg, 0.38 mmol, 93%) as a yellow oil.  $^1\text{H NMR}$  (500 MHz,  $\text{MeOD-d}_4$ , 333 K, two stable conformations observed at the pyrrolidine ring [50:50 mixture]):  $\delta$  8.01 (0.5H, s,  $\text{NCHO}$ ), 7.99 (0.5H, s,  $\text{NCHO}$ ), 4.85 (0.5H, s, 2-H), 4.83 (0.5H, s, 2-H), 4.06 (0.5H, d,  $J$  5.8, 8-H), 4.04 (0.5H, d,  $J$  5.7, 8-H), 3.77 (0.5H, dd,  $J$  11.0, 9.4, 11- $\text{H}_\text{B-conf1}$ ), 3.63 (0.5H, d,  $J$  11.9, 13- $\text{H}_\text{A-conf1}$ ), 3.62 (0.5H, d,  $J$  12.8, 13- $\text{H}_\text{A-conf2}$ ), 3.55 (0.5H, d,  $J$  11.9, 13- $\text{H}_\text{B-conf1}$ ), 3.49 (0.5H, dd,  $J$  12.2, 9.6, 11- $\text{H}_\text{B-conf2}$ ), 3.42 (0.5H, dd,  $J$  12.2, 5.2, 11- $\text{H}_\text{A-conf2}$ ), 3.40 (0.5H, d,  $J$  12.8, 13- $\text{H}_\text{B-conf2}$ ), 3.35 (0.5H, dd,  $J$  11.0, 6.3, 11- $\text{H}_\text{A-conf1}$ ), 3.03-2.91 (1H, m, 10-H), 2.27 (1.5H, s,  $\text{NCH}_3$ ), 2.26 (1.5H, s,  $\text{NCH}_3$ ), 2.21 (1.5H, s,  $\text{C}_\text{q}\text{CH}_3$ ), 2.21 (1.5H, s,  $\text{C}_\text{q}\text{CH}_3$ ), 2.06 (0.5H, dd,  $J$  12.1, 8.9, 9- $\text{H}_\text{A}$ ), 2.01 (0.5H, dd,  $J$  12.2, 8.8, 9- $\text{H}_\text{A}$ ), 1.88 (0.5H, dd,  $J$  12.2, 5.7, 9- $\text{H}_\text{B}$ ), 1.84 (0.5H, dd,  $J$  12.1, 5.8, 9- $\text{H}_\text{B}$ ).  $^{13}\text{C NMR}$  (125 MHz,  $\text{MeOD-d}_4$ , 333 K):  $\delta$  172.3, 163.2, 163.1, 159.8, 112.7, 76.4, 76.1, 64.3, 64.0, 62.7, 62.5, 54.7, 51.3, 49.6, 46.8, 40.9, 40.8, 39.8, 38.7, 31.8, 31.7, 10.2 [22 of 26 expected peaks observed]. **IR**  $\nu_{\text{max}}$ (film)/ $\text{cm}^{-1}$  3355, 1641, 1450. **HRMS** (ESI):  $\text{C}_{13}\text{H}_{18}\text{N}_3\text{O}_3$   $[\text{M}+\text{H}]^+$ ; calculated 264.1343, found 264.1343.

#### 5.4.3.11 Preparation of fragment derived from scaffold 18

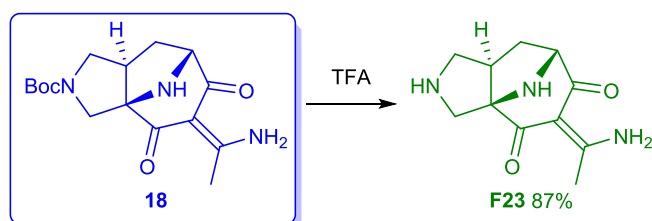

#### (1*R*\*,5*R*\*,7*R*\*,9*E*)-9-(1-Aminoethylidene)-3,11-diazatricyclo[5.3.1.0<sup>1,5</sup>]undecane-8,10-dione F23

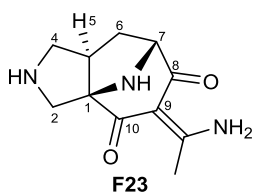

Deprotection of Boc-protected compound **18** (100 mg, 0.31 mmol) was carried out by following general procedure I. Purification by SCX SPE eluting with MeOH then sat. NH<sub>3</sub>/MeOH gave the *title compound* **F23** (60 mg, 0.27 mmol, 87%) as a yellow oil. <sup>1</sup>H NMR (400 MHz, MeOD-d<sub>4</sub>): δ 3.88 (1H, d, *J* 6.6, 7-H), 3.61 (1H, d, *J* 12.5, 2-H<sub>A</sub>), 3.37 (1H, s, NH), 3.16 (1H, dd, *J* 11.9, 8.4, 4-H<sub>B</sub>), 2.80 (1H, d, *J* 12.5, 2-H<sub>B</sub>), 2.78 (1H, dd, *J* 11.9, 6.3, 4-H<sub>A</sub>), 2.58 (1H, app. tt, *J* 8.5, 5.9, 5-H), 2.50 (3H, s, CH<sub>3</sub>), 2.14 (1H, dd, *J* 12.8, 8.8, 6-H<sub>A</sub>), 1.92 (1H, ddd, *J* 12.8, 6.6, 6.4, 6-H<sub>B</sub>). <sup>13</sup>C NMR (100 MHz, MeOD-d<sub>4</sub>): δ 200.5, 197.3, 175.7, 103.2, 79.7, 68.7, 53.1, 50.1, 49.1, 48.5, 34.6. HRMS (ESI): C<sub>11</sub>H<sub>16</sub>N<sub>3</sub>O<sub>2</sub> [M+H]<sup>+</sup>; calculated 222.1237, found 222.1235.

#### 5.4.3.12 Preparation of a fragment derived from scaffold 19

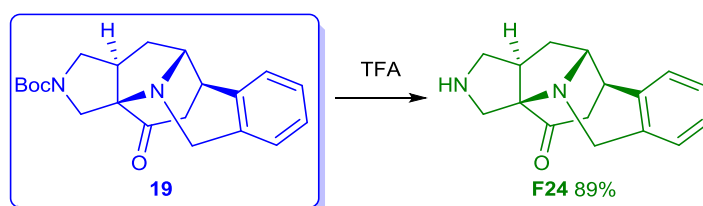

#### (1*R*\*,10*R*\*,13*R*\*,17*R*\*)-2,15-diazapentacyclo[8.8.0.0<sup>2,13</sup>.0<sup>4,9</sup>.0<sup>13,17</sup>]octadeca-4(9),5,7-triene-12-one F24

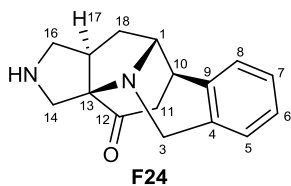

Deprotection of Boc-protected compound **19** (12 mg, 34 μmol) was carried out by following general procedure I. Purification by SCX SPE eluting with MeOH then sat. NH<sub>3</sub>/MeOH gave the *title compound* **F24** (8 mg, 31 μmol, 93%) as a yellow oil. <sup>1</sup>H NMR (500 MHz, CDCl<sub>3</sub>): δ 7.18 (1H, app. td, *J* 7.4, 1.3, 6-H or 7-H), 7.14 (1H, app. t, *J* 7.5, 6-H or 7-H), 7.01-6.96 (2H, m, 5-H and 8-H), 4.34 (1H, d, *J* 18.4, 3-H<sub>A</sub>), 3.98 (1H, d, *J* 18.4, 3-H<sub>B</sub>), 3.75 (1H, d, *J* 6.3, 1-H), 3.38-3.25 (3H, m, 10-H, 14-H<sub>A</sub> and



16-H<sub>A</sub>), 2.98-2.90 (3H, m, 11-H<sub>B</sub>, 14-H<sub>B</sub> and 16-H<sub>B</sub>), 2.72-2.59 (1H, m, 17-H), 2.34 (1H, dd, *J* 13.1, 9.2, 18-H<sub>A</sub>), 2.26 (1H, d, *J* 15.0, 11-H<sub>A</sub>), 2.17 (1H, ddd, *J* 13.1, 6.3, 4.3, 18-H<sub>B</sub>). <sup>13</sup>C NMR (125 MHz, CDCl<sub>3</sub>): δ 209.1, 139.5, 132.0, 127.7, 127.2, 126.7, 125.8, 83.9, 60.0, 55.0, 48.7, 48.5, 46.6, 45.0, 44.5, 33.8. HRMS (ESI): C<sub>16</sub>H<sub>19</sub>N<sub>2</sub>O [M+H]<sup>+</sup>; calculated 255.1492, found 255.1484.

#### 5.4.3.13 Preparation of fragments derived from scaffold 20

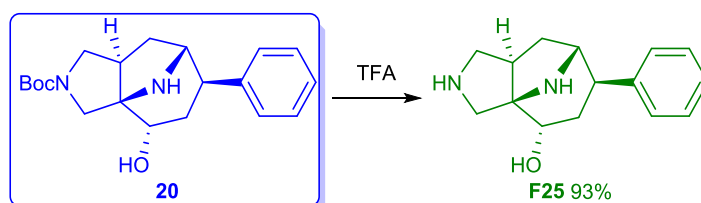

#### (1*R*\*,5*R*\*,7*R*\*,8*R*\*,10*S*\*)-8-Phenyl-3,11-diazatricyclo[5.3.1.0<sup>1,5</sup>]undecan-10-ol **F25**

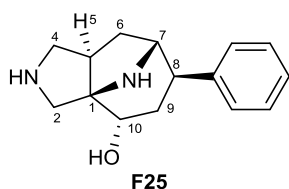

Deprotection of Boc-protected compound **20** (40 mg, 0.12 mmol) was carried out by following general procedure I. Purification by SCX SPE eluting with MeOH then sat. NH<sub>3</sub>/MeOH gave the *title compound* **F25** (26 mg, 0.11 mmol, 89%) as a brown oil. <sup>1</sup>H NMR (500 MHz, MeOD-d<sub>4</sub>, 333 K): δ 7.28-7.13 (4H, m, Ar-H), 7.10-7.04 (1H, m, Ar-H), 3.97 (1H, dd, *J* 10.6, 5.7, 10-H), 3.57 (1H, app. d, *J* 6.6, 7-H), 3.05 (1H, d, *J* 12.1, 2-H<sub>A</sub>), 3.04 (1H, d, *J* 11.1, 4-H<sub>A</sub>), 2.91 (1H, app. d, *J* 7.3, 8-H), 2.69-2.61 (1H, m, 5-H), 2.58 (1H, d, *J* 12.1, 2-H<sub>B</sub>), 2.58 (1H, dd, *J* 11.1, 6.3, 4-H<sub>B</sub>), 2.21 (1H, ddt, *J* 14.3, 5.8, 1.2, 9-H<sub>A</sub>), 2.02 (1H, dd, *J* 13.1, 8.8, 6-H<sub>A</sub>), 1.79 (1H, ddd, *J* 13.1, 6.6, 4.7, 6-H<sub>B</sub>), 1.74 (1H, ddd, *J* 14.3, 10.7, 7.4, 9-H<sub>B</sub>). <sup>13</sup>C NMR (125 MHz, MeOD-d<sub>4</sub>, 333 K): δ 145.5, 129.5, 128.9, 127.0, 78.4, 68.6, 65.0, 55.5, 52.8, 47.7, 42.3, 38.9, 33.9. IR  $\nu_{\text{max}}$ (film)/cm<sup>-1</sup> 3386, 1480, 1447. HRMS (ESI): C<sub>15</sub>H<sub>20</sub>N<sub>2</sub>O [M+H]<sup>+</sup>; calculated 245.1654, found 245.1650.

### 5.4.3.14 Preparation of fragments derived from scaffold S16

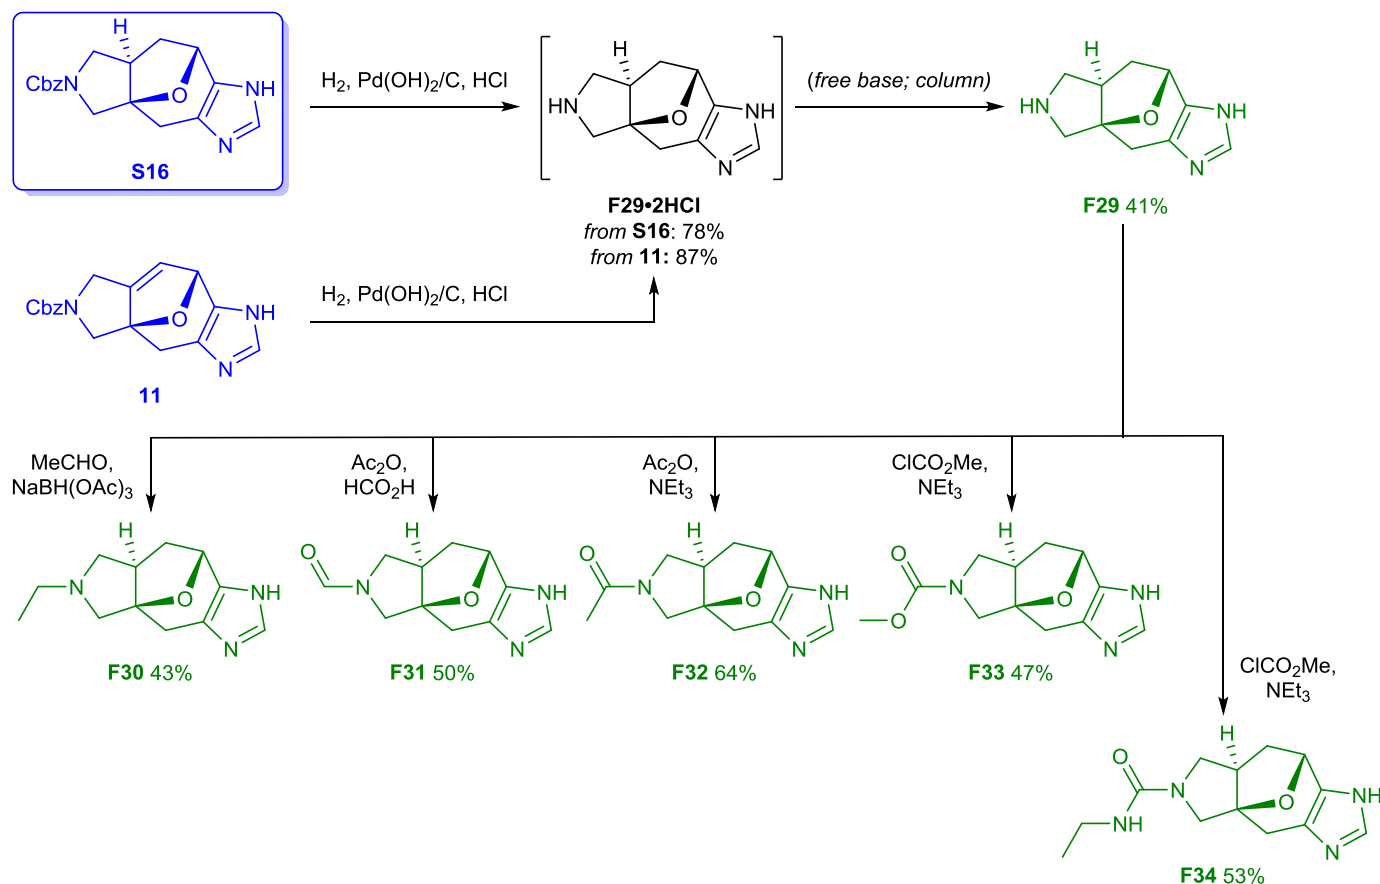

#### (1*R*\*,8*R*\*,10*R*\*)-14-oxa-4,6,12-triazatetracyclo[6.5.1.0<sup>1,10</sup>.0<sup>3,7</sup>]tetradeca-3(7),4-diene F29

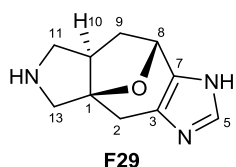

**From compound S16:** Hydrogenation was carried out following general procedure **B** using compound **S16** (323 mg, 1.00 mmol), Pd(OH)<sub>2</sub>/C (60 mg, 20% w/w) and conc. HCl (0.1 mL) in MeOH (10 mL) over 15 h. Filtration gave the *title compound* **F29** as the dihydrochloride salt (207 mg, 0.78 mmol, 78%), a

colourless foam which was carried on to subsequent steps without further purification {<sup>1</sup>H NMR (500 MHz, MeOD-d<sub>4</sub>, 333 K, 2 × N<sup>+</sup>H<sub>2</sub> not observed): δ 9.06 (1H, s, 5-H), 5.78 (1H, br. s, 8-H), 4.18-4.07 (1H, m, 13-H<sub>A</sub>), 4.07-3.94 (1H, m, 11-H<sub>A</sub>), 3.89-3.76 (1H, m, 13-H<sub>B</sub>), 3.74-3.64 (2H, m, 2-H<sub>A</sub> and 11-H<sub>B</sub>), 3.48-3.31 (2H, m, 2-H<sub>B</sub> and 10-H), 3.14-2.98 (1H, m, 9-H<sub>A</sub>), 2.71-2.58 (1H, m, 9-H<sub>B</sub>). <sup>13</sup>C NMR (125 MHz, MeOD-d<sub>4</sub>, 333 K): δ 134.3 (5-C), 132.5 (7-C), 125.9 (3-C), 90.9 (1-C), 74.5 (8-C), 54.5 (13-C), 53.6 (11-C), 46.6 (10-C), 45.7 (9-C), 30.9 (2-C)}.

**From compound 11:** Hydrogenation was carried out following general procedure **B** using compound **11** (1.42 g, 4.36 mmol), Pd(OH)<sub>2</sub>/C (300 mg, 20% w/w) and conc. HCl (0.5 mL) in

MeOH (25 mL) over 15 h. Filtration gave the *title compound* **F29** as the dihydrochloride salt (1.00 g, 3.78 mmol, 87%), a colourless foam.

**Procedure to prepare the free amine:** A sample of the amine hydrochloride salt **F29·2HCl** (625 mg, 2.37 mmol) was purified by SCX SPE following general procedure **A**, eluting with MeOH, then sat. NH<sub>3</sub>/MeOH, followed by flash chromatography eluting with 50:8:1 CH<sub>2</sub>Cl<sub>2</sub>–EtOH–NH<sub>3</sub>/MeOH to give the *title compound* **F29** (184 mg, 0.96 mmol, 41%) as a colourless foam. **<sup>1</sup>H NMR** (400 MHz, CDCl<sub>3</sub>, imidazole NH not observed): δ 7.44 (1H, s, 5-H), 5.18 (1H, d, *J* 5.6, 8-H), 3.28 (1H, d, *J* 12.6, 13-H<sub>A</sub>), 3.15 (1H, d, *J* 15.0, 2-H<sub>A</sub>), 3.02 (1H, dd, *J* 12.3, 7.5, 11-H<sub>B</sub>), 2.83 (1H, d, *J* 12.3, 11-H<sub>A</sub>), 2.63 (1H, d, *J* 12.6, 13-H<sub>B</sub>), 2.58-2.49 (2H, m, includes: 1H, 9-H<sub>A</sub>; and at δ 2.52: d, *J* 15.0, 2-H<sub>B</sub>), 2.49-2.40 (1H, m, 10-H), 1.94-1.83 (1H, m, 9-H<sub>B</sub>). **<sup>13</sup>C NMR** (100 MHz, CDCl<sub>3</sub>, 2 × imidazole C<sub>q</sub> not observed): δ 133.4 (5-C), 93.3 (1-C), 75.8 (8-C), 56.6 (13-C), 54.1 (11-C), 48.2 (10-C), 45.6 (9-C), 31.5 (2-C). **IR** *v*<sub>max</sub>(film)/cm<sup>-1</sup> 2959 2918, 2860 1443, 1225, 993, 909, 729. **HRMS** (ESI): C<sub>10</sub>H<sub>14</sub>N<sub>3</sub>O [M+H]<sup>+</sup>; calculated 192.1131, found 192.1129.

**(1*R*\*,8*R*\*,10*R*\*)-12-Ethyl-14-oxa-4,6,12-triazatetracyclo[6.5.1.0<sup>1,10</sup>.0<sup>3,7</sup>]tetradeca-3(7),4-diene**

**F30**

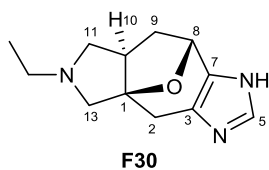

Reductive amination was carried out by following general procedure **C**, using amine hydrochloride **F29·2HCl** (120 mg, 0.45 mmol) and acetaldehyde (5.0 M in THF, 3.0 eq.). Flash chromatography eluting with 93:7:1 CH<sub>2</sub>Cl<sub>2</sub>–EtOH–NH<sub>3</sub>/MeOH gave the *title compound* **F30** (42 mg, 0.19 mmol, 43%, {estimate

90% purity\*}) as a yellow oil. *R<sub>f</sub>* 0.29 (93:7:1 CH<sub>2</sub>Cl<sub>2</sub>–EtOH–NH<sub>3</sub>/MeOH). **<sup>1</sup>H NMR** (400 MHz, CDCl<sub>3</sub>, imidazole NH not observed): δ 7.41 (1H, s, 5-H), 5.22 (1H, d, *J* 5.6, 8-H), 3.23 (1H, d, *J* 10.5, 13-H<sub>A</sub>), 3.15 (1H, d, *J* 15.2, 2-H<sub>A</sub>), 2.79 (1H, app. d, *J* 7.2, 11-H<sub>B</sub>), 2.64-2.36 (6H, m, includes: 1H, 2-H<sub>B</sub>; 1H, 9-H<sub>A</sub>; 1H, 10-H; 1H, 11-H<sub>A</sub>; 2H, NCH<sub>2</sub>CH<sub>3</sub>), 2.28 (1H, d, *J* 10.5, 13-H<sub>B</sub>), 2.09-1.98 (1H, m, 9-H<sub>B</sub>), 1.14 (3H, t, *J* 7.3, NCH<sub>2</sub>CH<sub>3</sub>). **<sup>13</sup>C NMR** (100 MHz, CDCl<sub>3</sub>): δ 136.6 (7-C), 133.4 (5-C), 124.7 (3-C), 90.4 (1-C), 75.7 (8-C), 62.8 (13-C), 59.5 (11-C), 49.9 (NCH<sub>2</sub>CH<sub>3</sub>), 46.2 (10-C), 44.6 (9-C), 32.9 (2-C), 13.3 (NCH<sub>2</sub>CH<sub>3</sub>). **IR** *v*<sub>max</sub>(film)/cm<sup>-1</sup> 2971, 2805, 2688, 1590, 1449, 1375, 1343. **HRMS** (ESI): C<sub>12</sub>H<sub>18</sub>N<sub>3</sub>O [M+H]<sup>+</sup>; calculated 220.1444, found 220.1440.

\* As judged by analysis of the product by NMR spectroscopy at 400 MHz.

**(1R\*,8R\*,10R\*)-14-Oxa-4,6,12-triazatetracyclo[6.5.1.0<sup>1,10</sup>.0<sup>3,7</sup>]tetradeca-3(7),4-diene-12-carbaldehyde F31**

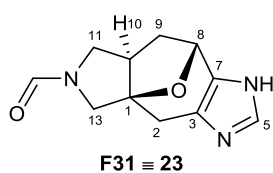

*N*-Formylation was carried out by following general procedure **D**, using amine **F29** (80 mg, 0.42 mmol) and Ac<sub>2</sub>O (10 eq.). Flash chromatography eluting with 93:7:1 CH<sub>2</sub>Cl<sub>2</sub>–EtOH–NH<sub>3</sub>/MeOH gave the *title compound* **F31** (45 mg, 0.21 mmol, 50%) a colourless oil. *R*<sub>f</sub> 0.27 (93:7:1 CH<sub>2</sub>Cl<sub>2</sub>–EtOH–NH<sub>3</sub>/MeOH).

**<sup>1</sup>H NMR** (400 MHz, MeOD-*d*<sub>4</sub>, two stable conformations observed at the pyrrolidine ring [50:50 mixture], imidazole NH not observed): δ 8.16 (0.5H, s, NCHO), 8.14 (0.5H, s, NHCO), 7.49 (1H, s, 5-H), 5.12 (1H, d, *J* 5.6, 8-H), 4.14 (0.5H, d, *J* 13.3, 13-H<sub>A-conf1</sub>), 4.00 (0.5H, d, *J* 12.5, 13-H<sub>A-conf2</sub>), 3.84 (0.5H, dd, *J* 11.6, 8.7, 11-H<sub>B-conf1</sub>), 3.74 (0.5H, dd, *J* 12.7, 2.7, 11-H<sub>A-conf2</sub>), 3.57–3.44 (1.5H, m, includes: 0.5H, 11-H<sub>A-conf1</sub>; 0.5H, 11-H<sub>B-conf2</sub>; and at δ 3.53: 0.5H, d, *J* 12.5, 13-H<sub>B-conf2</sub>), 3.27 (0.5H, d, *J* 13.3, 13-H<sub>B-conf1</sub>), 3.17–3.07 (1H, m, 2-H<sub>A</sub>, includes at δ 3.13: 0.5H, *J* 15.3; and at δ 3.11: 0.5H, *J* 15.3), 2.73–2.64 (2H, m, includes: 1H, 10-H; and at δ 2.70: 0.5H, *J* 15.3, 2-H<sub>B</sub>, and at δ 2.68: 0.5H, *J* 15.3, 2-H<sub>B</sub>), 2.57–2.44 (1H, m, 9-H<sub>A</sub>), 2.08–1.90 (1H, m, 9-H<sub>B</sub>). **<sup>13</sup>C NMR** (100 MHz, MeOD-*d*<sub>4</sub>, 2 × Ar-C<sub>q</sub> not observed): δ 163.3 (NCHO), 163.0 (NCHO), 134.9 (5-C), 91.6 (1-C), 91.0 (1-C), 77.0 (8-C), 76.9 (8-C), 55.9 (13-C<sub>conf2</sub>), 53.8 (11-C<sub>conf1</sub>), 52.3 (13-C<sub>conf1</sub>), 50.3 (11-C<sub>conf2</sub>), 47.2 (10-C), 47.0 (10-C), 46.9 (9-C), 45.9 (9-C), 32.9 (2-C), 32.5 (2-C) [17 of 22 expected peaks observed]. **IR** *v*<sub>max</sub>(film)/cm<sup>-1</sup> 2963, 2865, 1645 (CO), 1437, 1389, 1231, 992. **HRMS** (ESI): C<sub>11</sub>H<sub>13</sub>N<sub>3</sub>NaO<sub>2</sub> [M+H]<sup>+</sup>; calculated 242.0900, found 242.0897.

**1-[(1R\*,8R\*,10R\*)-14-Oxa-4,6,12-triazatetracyclo[6.5.1.0<sup>1,10</sup>.0<sup>3,7</sup>]tetradeca-3(7),4-dien-12-yl]ethan-1-one F32**

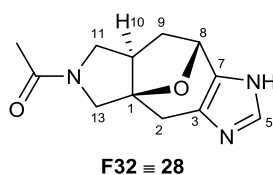

Ac<sub>2</sub>O (20 μL, 0.22 mmol, 0.5 eq.) was added to a stirred solution of amine **F29** (83 mg, 0.43 mmol, 1.00 eq.) and NEt<sub>3</sub> (90 μL, 0.65 mmol, 1.5 eq.) in CDCl<sub>3</sub> (10 mL) at 0 °C. The reaction mixture was stirred for 10 minutes, then concentrated *in vacuo*. Flash chromatography eluting with 93:7:1 CH<sub>2</sub>Cl<sub>2</sub>–

EtOH–NH<sub>3</sub>/MeOH gave the *title compound* **F32** (64 mg, 0.27 mmol, 64%) as a colourless oil. *R*<sub>f</sub> 0.12 (50:8:1 CH<sub>2</sub>Cl<sub>2</sub>–EtOH–NH<sub>3</sub>/MeOH). **<sup>1</sup>H NMR** (400 MHz, CDCl<sub>3</sub>, two stable conformations observed at the pyrrolidine ring [50:50 mixture], imidazole NH not observed): δ 7.43 (0.5H, s, 5-H), 7.42 (0.5H, s, 5-H), 5.25 (0.5H, d, *J* 5.8, 8-H), 5.22 (0.5H, d, *J* 5.8, 8-H), 4.15 (0.5H, d, *J* 13.6, 13-H<sub>A-conf1</sub>), 3.98 (0.5H, d, *J* 12.2, 13-H<sub>A-conf2</sub>), 3.89 (0.5H, dd, *J* 10.8, 9.5, 11-H<sub>B-conf1</sub>), 3.71 (0.5H, dd, *J* 12.5, 9.0, 11-H<sub>B-conf2</sub>), 3.63 (0.5H, dd, *J* 12.5, 4.5, 11-H<sub>A-conf2</sub>), 3.49 (0.5H, d, *J* 12.2, 13-H<sub>B-conf2</sub>), 3.44 (0.5H, d, *J* 13.6, 13-H<sub>B-conf1</sub>), 3.40 (0.5H, dd, *J* 10.8, 5.4, 11-H<sub>A-conf1</sub>), 3.23–3.15 (1H, m, 2-H<sub>A</sub>, includes at δ 3.20: 0.5H, *J* 15.3; and at δ 3.18: 0.5H, *J* 15.3), 2.80–2.71 (0.5H, m, 10-H<sub>conf1</sub>), 2.69–2.57 (1.5H, m,

includes: 0.5H, 10-H<sub>conf2</sub>; at  $\delta$  2.62: 0.5H, d,  $J$  15.3, 2-H<sub>B</sub>, and at  $\delta$  2.60: 0.5H, d,  $J$  15.3, 2-H<sub>B</sub>), 2.51 (0.5H, d,  $J$  11.9, 9-H<sub>A</sub>), 2.49 (0.5H, d,  $J$  11.9, 9-H<sub>A</sub>), 2.14-2.02 (4H, m, includes: 1H, 9-H<sub>B</sub>; and at  $\delta$  2.09: 1.5H, s, COCH<sub>3</sub> and at  $\delta$  2.05: 1.5H, s, COCH<sub>3</sub>). **<sup>13</sup>C NMR** (100 MHz, CDCl<sub>3</sub>, mixture of two rotamers):  $\delta$  169.6 (COCH<sub>3</sub>), 169.5 (COCH<sub>3</sub>), 137.6 (7-C), 136.4 (7-C), 133.7 (5-C), 123.9 (3-C), 122.8 (3-C), 91.1 (1-C), 89.7 (1-C), 76.5 (8-C), 76.2 (8-C), 56.5 (13-C<sub>conf2</sub>), 55.2 (13-C<sub>conf1</sub>), 54.5 (11-C<sub>conf1</sub>), 52.7 (11-C<sub>conf2</sub>), 47.2 (10-C), 46.1 (9-C), 45.7 (9-C), 45.5 (10-C), 32.8 (2-C), 22.5 (COCH<sub>3</sub>), 22.2 (COCH<sub>3</sub>) [22 of 24 expected peaks observed]. **IR**  $\nu_{\max}$ (film)/cm<sup>-1</sup> 2967, 2872, 1624 (CO), 1448, 1239, 1224, 730. **HRMS** (ESI): C<sub>12</sub>H<sub>16</sub>N<sub>3</sub>O<sub>2</sub> [M+H]<sup>+</sup>; calculated 234.1237, found 234.1238.

**Methyl (1*R*\*,8*R*\*,10*R*\*)-14-oxa-4,6,12-triazatetracyclo[6.5.1.0<sup>1,10</sup>.0<sup>3,7</sup>]tetradeca-3(7),4-diene-12-carboxylate F33**

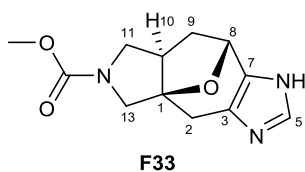

*N*-Carbamoylation was carried out by following general procedure **F**, using amine **F29** (80 mg, 0.42 mmol). Purification by SCX SPE, eluting with MeOH, then sat. NH<sub>3</sub>/MeOH, gave the *title compound* **F33** (49 mg, 0.20 mmol, 47%) as a colourless oil. **<sup>1</sup>H NMR** (400 MHz, CDCl<sub>3</sub>):  $\delta$  9.74 (1H, br. s, imidazole-NH), 7.43 (1H, s, 5-H), 5.24 (1H, d,  $J$  5.9, 8-H), 4.02 (1H, d,  $J$  11.9, 13-H<sub>A</sub>), 3.77-3.67 (4H, m, includes: 1H, 11-H<sub>A</sub>; and at  $\delta$  3.70: 3H, s, NCO<sub>2</sub>CH<sub>3</sub>), 3.54-3.31 (2H, m, 11-H<sub>B</sub> and 13-H<sub>B</sub>), 3.17 (1H, d,  $J$  15.2, 2-H<sub>A</sub>), 2.69-2.55 (2H, m, includes: 1H, 10-H; and at  $\delta$  2.58: 1H, d,  $J$  15.2, 2-H<sub>B</sub>), 2.48 (1H, dd,  $J$  11.3, 9.0, 9-H<sub>A</sub>), 2.12-2.03 (1H, m, 9-H<sub>B</sub>). **<sup>13</sup>C NMR** (100 MHz, CDCl<sub>3</sub>, 2  $\times$  Ar-C<sub>q</sub> not observed):  $\delta$  155.6 (NCO<sub>2</sub>CH<sub>3</sub>), 133.6 (5-C), 91.2 (1-C), 90.2 (1-C), 76.4 (8-C), 55.3 (13-C), 54.9 (13-C), 53.4 (11-C), 52.7 (NCO<sub>2</sub>CH<sub>3</sub>), 47.0 (10-C), 46.0 (10-C), 45.8 (9-C), 32.7 (2-C) [13 of 24 expected peaks observed]. **IR**  $\nu_{\max}$ (film)/cm<sup>-1</sup> 2957, 2868, 1688 (CO), 1451, 1393, 1239, 1221, 729. **HRMS** (ESI): C<sub>12</sub>H<sub>16</sub>N<sub>3</sub>O<sub>3</sub> [M+H]<sup>+</sup>; calculated 250.1186, found 250.1185.

**(1*R*\*,8*R*\*,10*R*\*)-*N*-Ethyl-14-oxa-4,6,12-triazatetracyclo[6.5.1.0<sup>1,10</sup>.0<sup>3,7</sup>]tetradeca-3(7),4-diene-12-carboxamide F34**

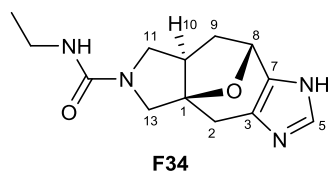

Ethyl isocyanate (32.5  $\mu$ L, 0.41 mmol, 0.90 eq.) was added to a stirred solution of amine **F29** (87 mg, 0.45 mmol, 1.00 eq.) in CHCl<sub>3</sub> (10 mL) at 0 °C. The reaction mixture was warmed to rt, stirred for 10 minutes, then concentrated *in vacuo*. Flash chromatography eluting with 93:7:1 CH<sub>2</sub>Cl<sub>2</sub>-EtOH-NH<sub>3</sub>/MeOH gave the *title compound* **F34** (62 mg, 0.24 mmol, 53%) as a colourless oil. **R<sub>f</sub>** 0.18 (50:8:1 CH<sub>2</sub>Cl<sub>2</sub>-EtOH-NH<sub>3</sub>/MeOH). **<sup>1</sup>H NMR** (400 MHz, CDCl<sub>3</sub>, imidazole NH not observed):  $\delta$  7.44 (1H, s, 5-H), 5.26 (1H, d,  $J$  5.9, 8-H), 4.25-4.16 (1H, m, NH), 3.90 (1H, d,  $J$  11.6, 13-H<sub>A</sub>),

3.72 (1H, app. t,  $J$  9.8, 11-H<sub>A</sub>), 3.40 (1H, d,  $J$  11.6, 13-H<sub>B</sub>), 3.36-3.23 (3H, m, 11-H<sub>B</sub> and NHCH<sub>2</sub>CH<sub>3</sub>), 3.19 (1H, d,  $J$  15.3, 2-H<sub>A</sub>), 2.73-2.64 (1H, m, 10-H), 2.61 (1H, d,  $J$  15.3, 2-H<sub>B</sub>), 2.49 (1H, dd,  $J$  11.7, 8.6, 9-H<sub>A</sub>), 2.14-2.06 (1H, m, 9-H<sub>B</sub>), 1.15 (3H, t,  $J$  7.2, NHCH<sub>2</sub>CH<sub>3</sub>). **<sup>13</sup>C NMR** (100 MHz, CDCl<sub>3</sub>, 2 × Ar-C<sub>q</sub> not observed): δ 157.3 (N(CO)NH), 133.7 (5-C), 90.7 (1-C), 76.5 (8-C), 55.2 (13-C), 53.5 (11-C), 46.6 (10-C), 45.9 (9-C), 35.7 (NHCH<sub>2</sub>), 33.0 (2-C), 15.8 (NHCH<sub>2</sub>CH<sub>3</sub>). **IR**  $\nu_{\text{max}}$ (film)/cm<sup>-1</sup> 2969, 2929, 2866, 1619 (CO), 1537, 1396, 1374, 727. **HRMS** (ESI): C<sub>13</sub>H<sub>19</sub>N<sub>4</sub>O<sub>2</sub> [M+H]<sup>+</sup>; calculated 263.1503, found 263.1504.

#### 5.4.3.15 Preparation of a fragment derived from scaffold **S19**

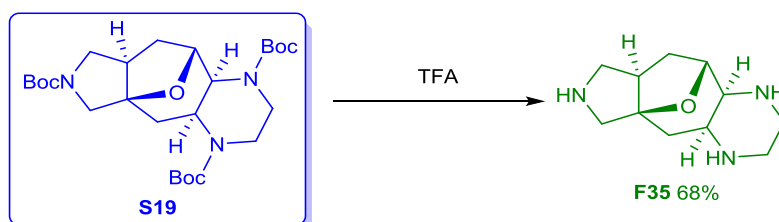

#### (1*R*\*,3*S*\*,8*S*\*,9*R*\*,11*R*\*)-15-Oxa-4,7,13-triazatetracyclo[7.5.1.0<sup>1,11</sup>.0<sup>3,8</sup>]pentadecane **F35**

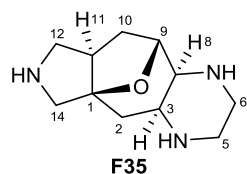

TFA (5 mL) was added to a stirred solution of compound **S19** (36 mg, 71 μmol, 1.00 eq.) in CH<sub>2</sub>Cl<sub>2</sub> (10 mL) at 0 °C. The reaction mixture was stirred for 1 h, then concentrated *in vacuo*. The residue was purified by SCX SPE following general procedure **A**, eluting with MeOH, then sat. NH<sub>3</sub>/MeOH to give the *title compound* **F35** (10 mg, 48 μmol, 68%) as a colourless oil. **<sup>1</sup>H NMR** (500 MHz, MeOD-d<sub>4</sub>, 3 × NH not observed): δ 4.33 (1H, d,  $J$  7.6, 9-H), 3.35-3.28 (2H, m, 5-H<sub>A</sub> and 6-H<sub>A</sub>), 3.23-3.17 (1H, m, 3-H), 3.01 (1H, dd,  $J$  12.9, 1.6, 12-H<sub>A</sub>), 2.97-2.78 (4H, m, 5-H<sub>B</sub>, 6-H<sub>B</sub>, 12-H<sub>B</sub> and 14-H<sub>A</sub>), 2.74 (1H, dd,  $J$  4.0, 1.9, 8-H), 2.71-2.63 (2H, m, 11-H and 14-H<sub>B</sub>), 2.47 (1H, app. t,  $J$  12.5, 2-H<sub>B</sub>), 2.21 (1H, dd,  $J$  13.2, 9.1, 10-H<sub>A</sub>), 1.97 (1H, ddd,  $J$  13.2, 7.6, 4.0, 10-H<sub>B</sub>), 1.58 (1H, dd,  $J$  13.0, 5.8, 2-H<sub>A</sub>). **<sup>13</sup>C NMR** (100 MHz, MeOD-d<sub>4</sub>): δ 92.7 (1-C), 82.0 (9-C), 56.8 (8-C), 55.5 (6-C), 55.0 (5-C), 47.6 (3-C), 46.3 (12-C), 45.6 (11-C), 39.7 (14-C), 36.9 (10-C), 31.3 (2-C). **IR**  $\nu_{\text{max}}$ (film)/cm<sup>-1</sup> 3387 (br. NH), 3252, 2931, 2856, 1452, 1108, 884, 836. **HRMS** (ESI): C<sub>11</sub>H<sub>20</sub>N<sub>3</sub>O [M+H]<sup>+</sup>; calculated 210.1600, found 210.1596.

**F35 NOESY correlations:**

**2-H<sub>A</sub>:** 2-H<sub>B</sub>, 3-H, 11-H

**3-H:** 2-H<sub>A</sub>, 8-H, 10-H<sub>A</sub>, 11-H

**8-H:** 3-H, 9-H, 10-H<sub>A</sub>

**9-H:** 8-H and 10-H<sub>B</sub>

**10-H<sub>A</sub>:** 3-H, 8-H, 10-H<sub>B</sub>, 11-H

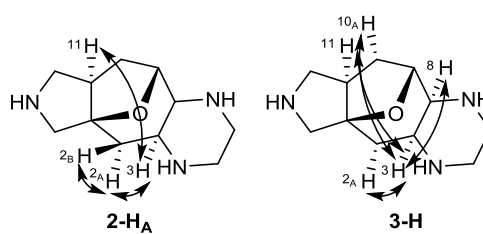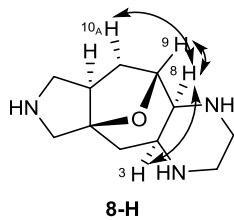

**8-H**

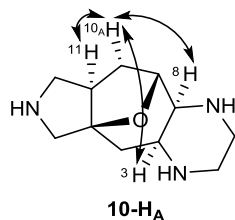

**10-H<sub>A</sub>**

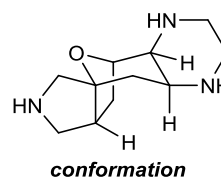

**conformation**

### 5.4.3.16 Preparation of a fragment derived from scaffold **S20**

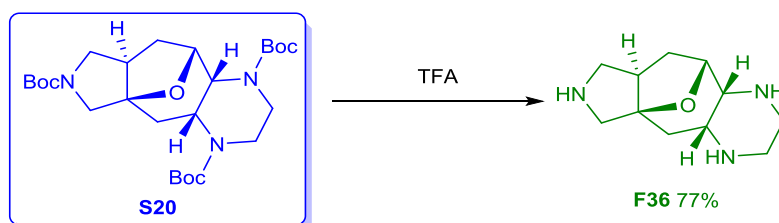

#### (1*R*\*,3*R*\*,8*R*\*,9*R*\*,11*R*\*)-15-Oxa-4,7,13-triazatetracyclo[7.5.1.0<sup>1,11</sup>.0<sup>3,8</sup>]pentadecane **F36**

**F36**

TFA (5 mL) was added to a stirred solution of **S20** (210 mg, 0.41 mmol, 1.00 eq.) in CH<sub>2</sub>Cl<sub>2</sub> (5 mL) at 0 °C. The reaction mixture was stirred for 1 h, then concentrated *in vacuo*. The residue was purified by SCX SPE following general procedure **A**, eluting with MeOH, then sat. NH<sub>3</sub>/MeOH, followed by flash chromatography eluting with 50:8:1 CH<sub>2</sub>Cl<sub>2</sub>–EtOH–NH<sub>3</sub>/MeOH to give the *title compound* **F36** (66 mg, 0.32 mmol, 77%) as a colourless oil. *R<sub>f</sub>* 0.15 (50:8:1 CH<sub>2</sub>Cl<sub>2</sub>–EtOH–NH<sub>3</sub>/MeOH). <sup>1</sup>H NMR (500 MHz, MeOD-*d*<sub>4</sub>, 3 × NH not observed): δ 4.32 (1H, dd, *J* 7.1, 4.5, 9-H), 3.21 (1H, t, *J* 5.2, 3-H), 3.16–3.09 (1H, m, 6-H<sub>A</sub>), 3.09–3.06 (2H, m, 11-H and 12-H<sub>A</sub>), 3.03 (1H, d, *J* 12.4, 14-H<sub>B</sub>), 3.00–2.94 (3H, m, 5-H<sub>A</sub>, 8-H and 10-H<sub>A</sub>), 2.79–2.71 (2H, m, 5-H<sub>B</sub> and 12-H<sub>B</sub>), 2.68 (1H, ddd, *J* 12.6, 3.2, 2.5, 6-H<sub>B</sub>), 2.61 (1H, d, *J* 12.4, 14-H<sub>A</sub>), 2.23 (1H, dd, *J* 14.1, 5.8, 2-H<sub>B</sub>), 1.88–1.81 (1H, m, 10-H<sub>B</sub>), 1.62 (1H, dd, *J* 14.1, 1.1, 2-H<sub>A</sub>). <sup>13</sup>C NMR (100 MHz, MeOD-*d*<sub>4</sub>): δ 92.5 (1-C), 82.4 (9-C), 56.6 (14-C), 56.1 (12-C), 54.8 (8-C), 53.4 (3-C), 47.8 (5-C), 47.5 (11-C), 42.3 (6-C), 39.3 (10-C), 38.5 (2-C). IR *v*<sub>max</sub>(film)/cm<sup>-1</sup> 3297 (br. NH), 2928, 2861, 1638, 1546, 1451, 1400, 1141, 1013. HRMS (ESI): C<sub>11</sub>H<sub>20</sub>N<sub>3</sub>O [M+H]<sup>+</sup>; calculated 210.1600, found 210.1600.

#### **F36** NOESY correlations:

- 2-H<sub>A</sub>: 2-H<sub>B</sub>, 3-H, 11-H, 14-H<sub>A</sub>
- 2-H<sub>B</sub>: 2-H<sub>A</sub>, 3-H, 8-H, 14-H<sub>A</sub>, 14-H<sub>B</sub>
- 3-H: 2-H<sub>A</sub>, 5-H<sub>B</sub>, 8-H
- 9-H: 8-H and 10-H<sub>B</sub>

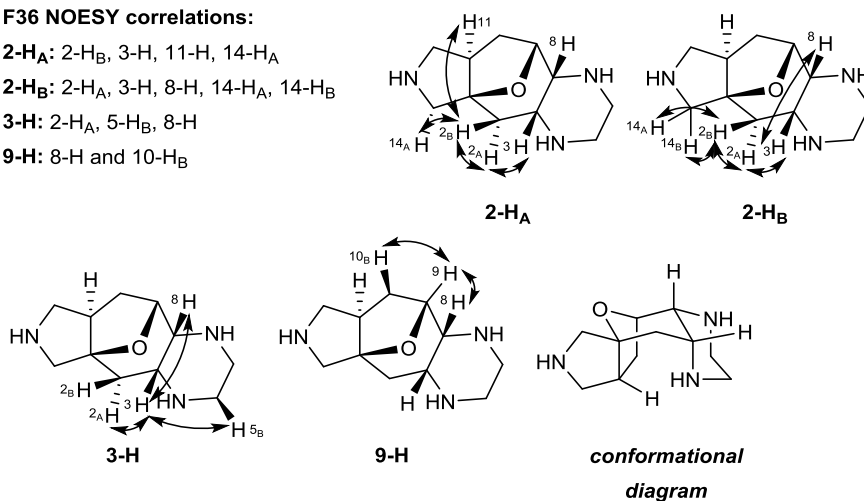



#### 5.4.3.17 Preparation of a fragment derived from scaffold **S21**

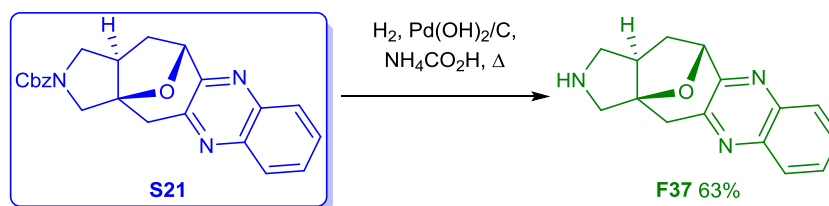

#### (1*R*\*, 13*R*\*, 15*R*\*)-19-Oxa-4,11,17-triazapentacyclo[11.5.1.0<sup>1,15</sup>.0<sup>3,12</sup>.0<sup>5,10</sup>]nonadeca-3,5(10),6,8,11-pentaene **F37**

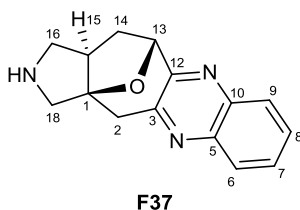

To a stirred solution of quinoxaline **S21** (400 mg, 1.03 mmol, 1.00 eq.) in EtOH (10 mL) was added 20 wt% Pd(OH)<sub>2</sub>/C (40 mg, 10% w/w) and NH<sub>4</sub>CO<sub>2</sub>H (325 mg, 5.15 mmol, 5.00 eq.). The reaction mixture was heated at reflux for 15 h, then additional 20 wt% Pd(OH)<sub>2</sub>/C (40 mg, 10% w/w) and NH<sub>4</sub>CO<sub>2</sub>H (325 mg, 5.15 mmol, 5.00 eq.) were added. The reaction mixture

was heated for a further 6 h, then cooled to rt. The reaction mixture was filtered through a pad of Celite eluting with EtOH, then concentrated *in vacuo*. The residue was partitioned between CH<sub>2</sub>Cl<sub>2</sub> (25 mL) and washed with sat. NaHCO<sub>3</sub> solution (25 mL). The phases were separated and the aqueous layer was extracted with CH<sub>2</sub>Cl<sub>2</sub> (3 × 10 mL). The combined organics were dried over MgSO<sub>4</sub>, filtered, and concentrated *in vacuo*. Flash chromatography eluting with 50:8:1 CH<sub>2</sub>Cl<sub>2</sub>–EtOH–NH<sub>3</sub>/MeOH gave the *title compound* **F37** (165 mg, 0.65 mmol, 63%) as a colourless oil. *R<sub>f</sub>* 0.10 (50:8:1 CH<sub>2</sub>Cl<sub>2</sub>–EtOH–NH<sub>3</sub>/MeOH). <sup>1</sup>H NMR (500 MHz, CDCl<sub>3</sub>, NH not observed): δ 8.04–7.97 (2H, m, 6-H and 9-H), 7.75–7.70 (2H, m, 7-H and 8-H), 5.41 (1H, d, *J* 6.5, 13-H), 3.62 (1H, d, *J* 17.3, 2-H<sub>A</sub>), 3.40 (1H, d, *J* 12.8, 18-H<sub>A</sub>), 3.14 (1H, dd, *J* 12.4, 7.8, 16-H<sub>B</sub>), 3.09 (1H, d, *J* 17.3, 2-H<sub>B</sub>), 2.90 (1H, d, *J* 12.4, 16-H<sub>A</sub>), 2.79 (1H, d, *J* 12.8, 18-H<sub>B</sub>), 2.58 (1H, dd, *J* 12.6, 9.2, 14-H<sub>A</sub>), 2.54–2.47 (1H, m, 15-H), 2.13 (1H, app. dt, *J* 13.6, 6.5, 14-H<sub>B</sub>). <sup>13</sup>C NMR (125 MHz, CDCl<sub>3</sub>): δ 155.4 (Ar-C<sub>q</sub>), 151.3 (Ar-C<sub>q</sub>), 142.1 (Ar-C<sub>q</sub>), 140.7 (Ar-C<sub>q</sub>), 129.8 (Ar-C), 129.7 (Ar-C), 128.9 (Ar-C), 128.7 (Ar-C), 93.6 (1-C), 81.0 (13-C), 56.8 (18-C), 55.2 (16-C), 47.5 (15-C), 44.0 (14-C), 40.0 (2-C). IR *v*<sub>max</sub>(film)/cm<sup>-1</sup> 2962, 2934, 1489, 1177, 1016, 958, 764. HRMS (ESI): C<sub>15</sub>H<sub>16</sub>N<sub>3</sub>O [M+H]<sup>+</sup>; calculated 254.1288, found 254.1289.

### 5.4.3.18 Preparation of fragments derived from scaffold S24

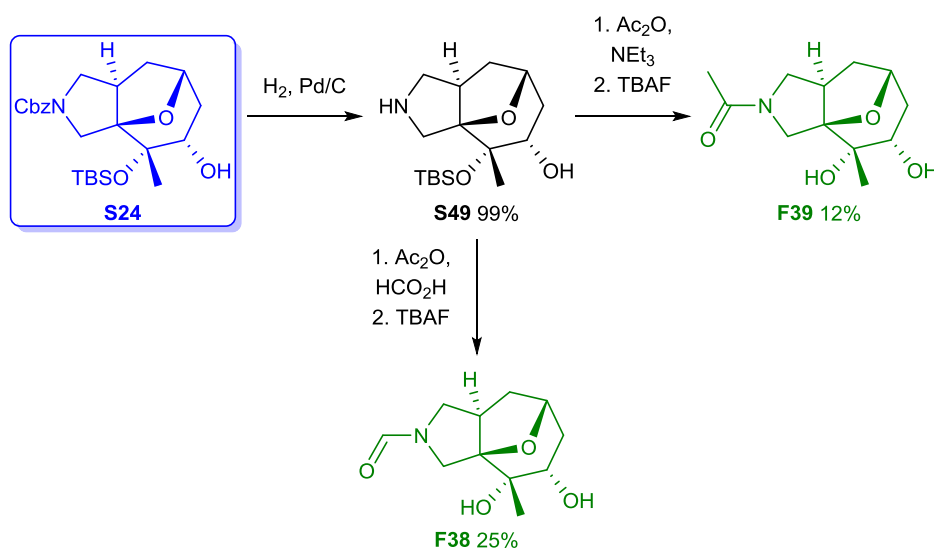

#### (1*R*\*,5*R*\*,7*R*\*,9*S*\*,10*S*\*)-10-[(*tert*-butyldimethylsilyl)oxy]-10-methyl-11-oxa-3-azatricyclo[5.3.1.0<sup>1,5</sup>]undecan-9-ol **S49**

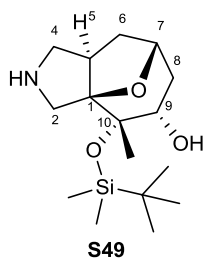

Hydrogenation was carried out following general procedure **B**, using compound **S24** (142 mg, 0.32 mmol) and Pd/C (14 mg, 10% w/w) in MeOH (10 mL) over 15 h. The reaction mixture was filtered through Celite then concentrated *in vacuo* to give the *title compound* **S49** (99 mg, 0.32 mmol, 99%) as a colourless oil which was carried on to the subsequent steps without further purification.

**<sup>1</sup>H NMR** (400 MHz,  $\text{CHCl}_3$ , 50:50 mixture of rotamers, characteristic peaks):  $\delta$  4.41 (1H, dd,  $J$  6.5, 5.0, 7-H), 3.67 (1H, d,  $J$  3.8), 3.20-2.94 (4H, m), 2.75 (1H, dd,  $J$  11.6, 4.3), 2.36 (1H, dd,  $J$  12.2, 8.9), 2.18-2.10 (3H, m), 1.76-1.69 (1H, m, 6- $\text{H}_\text{B}$ ), 1.69-1.63 (1H, m, 8- $\text{H}_\text{A}$ ), 1.29 (3H, s,  $\text{C}_\text{q}\text{CH}_3$ ), 0.94 (9H, s,  $\text{SiC}_\text{q}(\text{CH}_3)_3$ ), 0.12 (3H, s,  $\text{SiCH}_3$ ), 0.11 (3H, s,  $\text{SiCH}_3$ ).

**(1*R*\*,5*R*\*,7*R*\*,9*S*\*,10*S*\*)-9,10-dihydroxy-10-methyl-11-oxa-3-azatricyclo[5.3.1.0<sup>1,5</sup>]undecane-3-carbaldehyde F38**

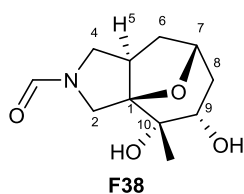

*N*-Formylation was carried out by following general procedure **D**, using compound **S49** (50 mg, 0.16 mmol) and Ac<sub>2</sub>O (30 eq.). *O*-Silyl deprotection was carried out by following general procedure **H**, using the crude residue. Purification by SCX SPE following general procedure **A**, eluting with MeOH, followed by flash chromatography eluting with 97:3:1 CH<sub>2</sub>Cl<sub>2</sub>–EtOH–NH<sub>3</sub>/MeOH gave the *title compound* **F38** (9 mg, 40 μmol, 25%, 2 steps) as a colourless oil. *R<sub>f</sub>* 0.09 (97:3:1 CH<sub>2</sub>Cl<sub>2</sub>–EtOH–NH<sub>3</sub>/MeOH). **<sup>1</sup>H NMR** (400 MHz, CHCl<sub>3</sub>, 50:50 mixture of rotamers, 2 × OH not observed): δ 8.11 (1H, 2 × s, NCHO), 4.55–4.45 (1H, m, 7-H), 4.00 (0.5H, dd, *J* 10.5, 9.3, 4-H<sub>B</sub>), 3.90 (0.5H, d, *J* 13.2, 2-H<sub>A</sub>), 3.85 (0.5H, d, *J* 13.2, 2-H<sub>A</sub>), 3.79–3.64 (2H, m, includes: 0.5H, 2-H<sub>B</sub>; 0.5H, 4-H<sub>B</sub>; and 1H, 9-H), 3.53–3.37 (1.5H, m, includes: 1H, 5-H; and at δ 3.49: 0.5H, d, *J* 13.2, 2-H<sub>B</sub>), 3.33–3.26 (1H, m, 4-H<sub>A</sub>), 2.66–2.61–2.51 (1H, m, 6-H<sub>A</sub>, includes at δ 2.61: 0.5H, dd, *J* 12.2, 8.6; and at δ 2.55: 0.5H, dd, *J* 12.2, 8.6), 2.14 (1H, dt, *J* 14.8, 4.5, 8-H<sub>B</sub>), 1.84–1.74 (2H, m, 6-H<sub>B</sub> and 8-H<sub>A</sub>), 1.31 (1.5H, s, C<sub>q</sub>CH<sub>3</sub>), 1.30 (1.5H, s, C<sub>q</sub>CH<sub>3</sub>). **<sup>13</sup>C NMR** (100 MHz, MeOD-*d*<sub>4</sub>, mixture of two rotamers): δ 163.3 (NCHO), 162.9 (NCHO), 95.3 (1-C), 94.9 (1-C), 78.8 (7-C), 78.4 (7-C), 73.8 (9-C), 73.7 (9-C), 71.3 (10-C), 71.1 (10-C), 55.8 (4-C), 52.8 (2-C), 51.8 (2-C), 41.4 (5-C), 40.9 (5-C), 39.6 (6-C), 37.6 (6-C), 37.6 (8-C), 37.5 (8-C), 23.1 (C<sub>q</sub>CH<sub>3</sub>) [20 of 22 expected peaks observed]. **IR** *v*<sub>max</sub>(film)/cm<sup>-1</sup> 3359 (br. OH), 2937, 2880, 1644 (CO), 1432, 1386, 1163, 1009. **HRMS** (ESI): C<sub>11</sub>H<sub>18</sub>NO<sub>4</sub> [M+H]<sup>+</sup>; calculated 228.1230, found 228.1230.

**1-[(1*R*\*,5*R*\*,7*R*\*,9*S*\*,10*S*\*)-9,10-Dihydroxy-10-methyl-11-oxa-3-azatricyclo[5.3.1.0<sup>1,5</sup>]undecan-3-yl]ethan-1-one F39 (≡ 24)**

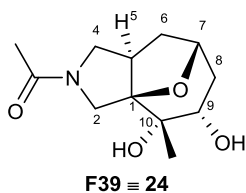

*N*-Acylation was carried out by following general procedure **E**, using **S49** (49 mg, 0.16 mmol). The reaction mixture was stirred at rt for 10 min, then sat. aq. NH<sub>4</sub>Cl (10 mL) was added. The phases were separated and the aqueous layer was extracted with CH<sub>2</sub>Cl<sub>2</sub> (2 × 10 mL). The combined organic phases were dried over MgSO<sub>4</sub>, filtered, and concentrated *in vacuo*. *O*-Silyl deprotection was carried out by following general procedure **H**, using the crude residue. Flash chromatography eluting with 29:1:0.1 CH<sub>2</sub>Cl<sub>2</sub>–EtOH–NH<sub>3</sub>/MeOH gave the *title compound* **F39** (≡ **24**: 4.5 mg, 18.5 μmol, 12%, 2 steps) as a colourless oil. *R<sub>f</sub>* 0.10 (29:1:0.1 CH<sub>2</sub>Cl<sub>2</sub>–EtOH–NH<sub>3</sub>/MeOH). **<sup>1</sup>H NMR** (400 MHz, CHCl<sub>3</sub>, 40:60 mixture of rotamers, 2 × OH not observed): δ 4.54–4.48 (1H, m, 7-H), 4.04–3.91 (1.4H, m, includes: 1H, 4-H<sub>B</sub>; and 0.4H, 2-H<sub>A</sub>), 3.84 (0.6H, d, *J* 13.3, 2-H<sub>A</sub>), 3.68 (1H, d, *J* 4.2, 9-H), 3.64 (0.4H, d, *J* 13.3, 2-H<sub>B</sub>), 3.59 (0.6H, d, *J* 13.3, 2-H<sub>B</sub>), 3.49 (0.6H, app. ddd, *J* 17.9,

8.4, 3.1, 5-H), 3.44-3.26 (1H, m, includes: 0.6H, 4-H<sub>A</sub>; and 0.4H, 5-H), 3.17 (0.4H, dd, *J* 12.2, 7.8, 4-H<sub>A</sub>), 2.61 (1H, dd, *J* 11.6, 8.9, 6-H<sub>A</sub>), 2.17-2.09 (1H, m, 8-H<sub>B</sub>), 2.07 (1.2H, s, NH(CO)CH<sub>3</sub>), 2.05 (1.8H, s, NH(CO)CH<sub>3</sub>), 1.89-1.74 (2H, m, 6-H<sub>B</sub> and 8-H<sub>A</sub>), 1.31 (1.2H, s, C<sub>q</sub>CH<sub>3</sub>), 1.30 (1.8H, s, C<sub>q</sub>CH<sub>3</sub>). **<sup>13</sup>C NMR** (100 MHz, MeOD-d<sub>4</sub>, mixture of two rotamers): δ 171.7 (N(CO)CH<sub>3</sub>), 96.3 (1-C), 94.9 (1-C), 78.6 (2 peaks, 7-C), 73.8 (2 peaks, 9-C), 71.1 (2 peaks, 10-C), 57.6 (4-C), 55.7 (4-C), 53.5 (2-C), 51.6 (2-C), 42.1 (5-C), 40.7 (5-C), 38.9 (6-C), 38.4 (6-C), 37.6 (8-C), 37.5 (8-C), 23.1 (2 peaks, C<sub>q</sub>CH<sub>3</sub>), 22.0 (N(CO)CH<sub>3</sub>), 21.8 (N(CO)CH<sub>3</sub>) [23 of 24 expected peaks observed]. **IR**  $\nu_{\text{max}}$ (film)/cm<sup>-1</sup> 3367 (br. OH), 2942, 2881, 1620 (CO), 1455, 1426, 1040, 1009. **HRMS** (ESI): C<sub>12</sub>H<sub>20</sub>NO<sub>4</sub> [M+H]<sup>+</sup>; calculated 242.1387, found 242.1387.

### 5.4.3.19 Preparation of fragments derived from scaffold S25

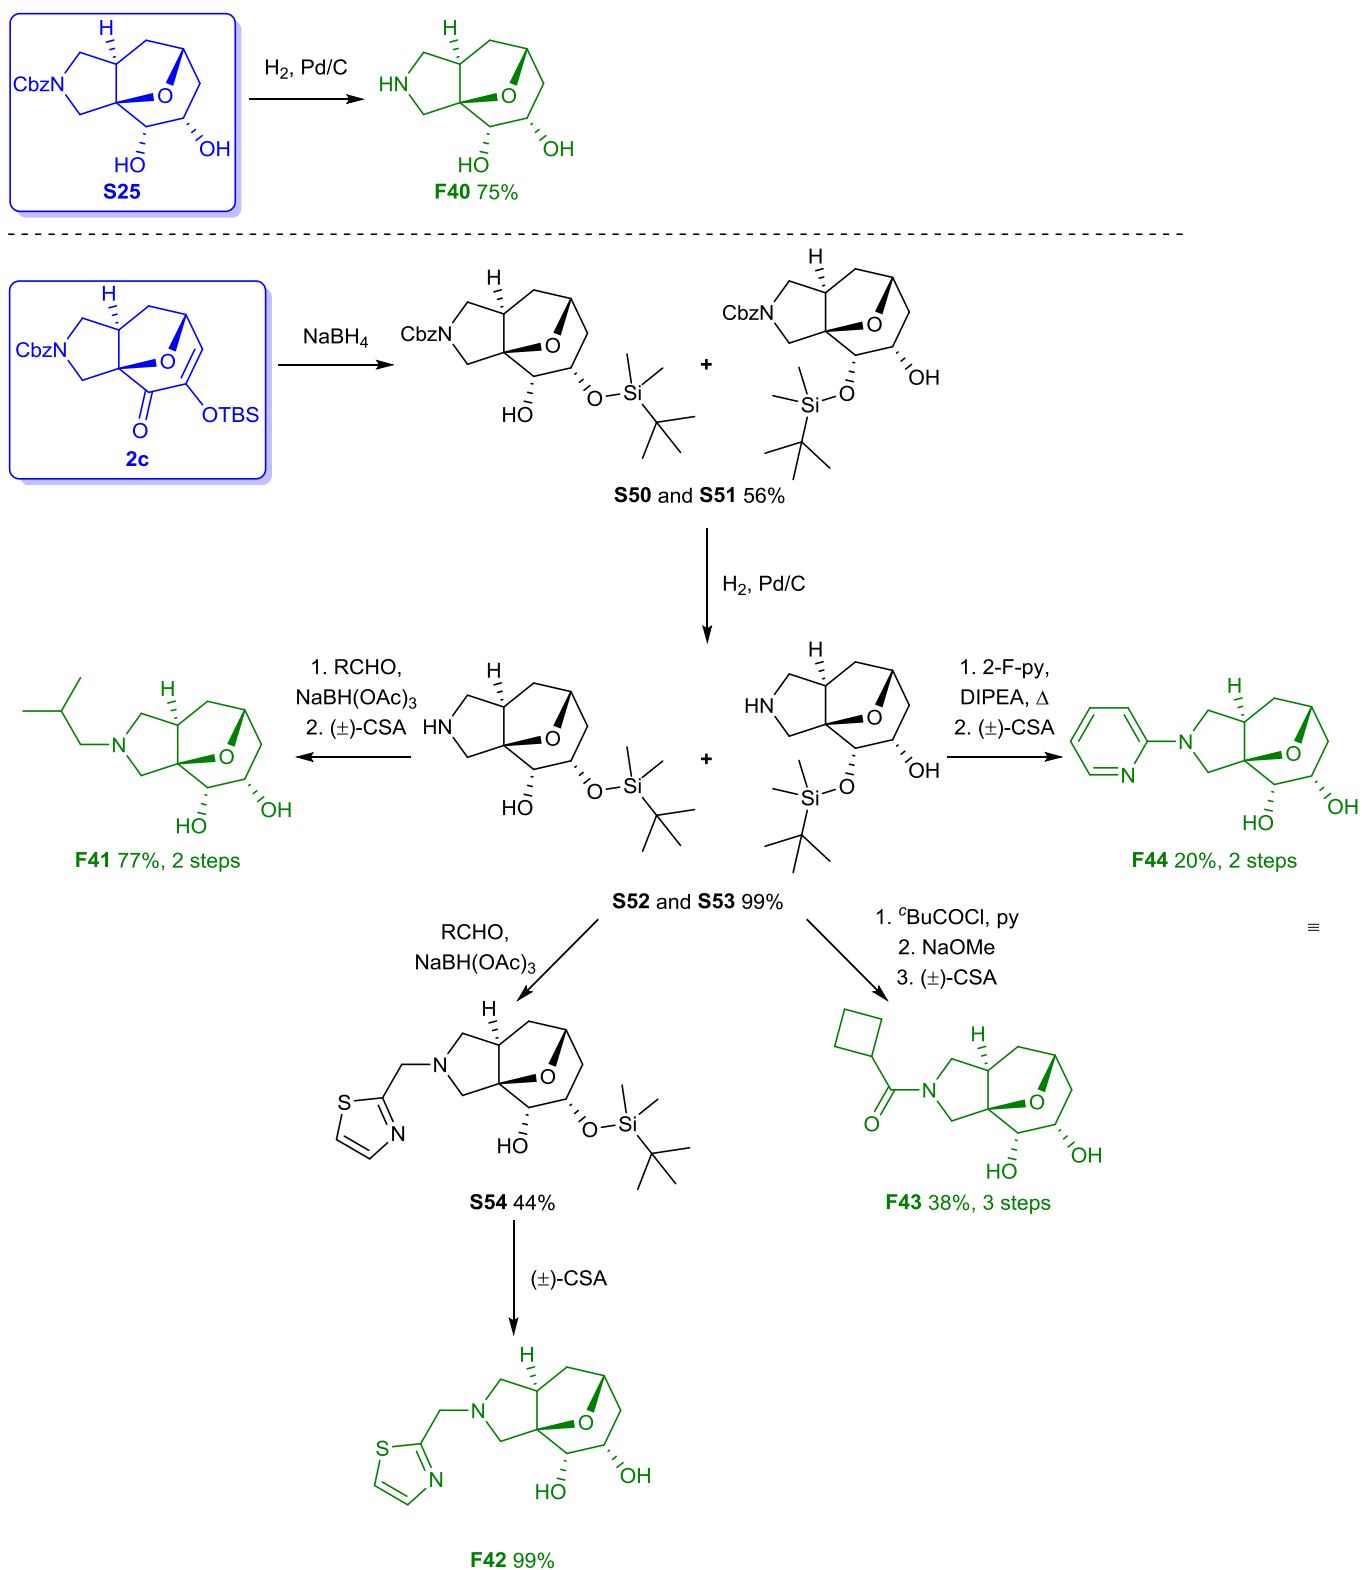

**(1R\*,5R\*,7R\*,9S\*,10S\*)-11-oxa-3-azatricyclo[5.3.1.0<sup>1,5</sup>]undecane-9,10-diol F40**

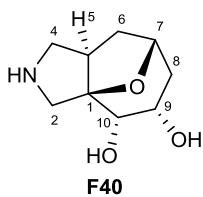

Hydrogenation was carried out following general procedure **B**, using compound **S25** (168 mg, 0.53 mmol) and Pd/C (20 mg, 10% w/w) in MeOH (10 mL) over 15 h. Flash chromatography eluting with 50:8:1 CH<sub>2</sub>Cl<sub>2</sub>–EtOH–NH<sub>3</sub>/MeOH, gave the *title compound* **F40** (74 mg, 0.40 mmol, 75%) as a colourless oil.

**<sup>1</sup>H NMR** (500 MHz, MeOD-d<sub>4</sub>, NH and 2 × OH not observed): δ 4.41-4.37 (1H, m, 7-H), 4.04 (1H, td, *J* 4.7, 1.1, 9-H), 3.73 (1H, d, *J* 4.7, 10-H), 3.22-3.16 (1H, m, 5-H), 3.09-3.02 (2H, m, includes at δ 3.07: 1H, d, *J* 12.4, 2-H<sub>B</sub>; and at δ 3.04: 1H, dd, *J* 11.8, 8.8, 4-H<sub>B</sub>), 2.85 (1H, d, *J* 12.4, 2-H<sub>A</sub>), 2.66 (1H, dd, *J* 11.8, 5.3, 4-H<sub>A</sub>), 2.46 (1H, dd, *J* 12.2, 9.0, 6-H<sub>A</sub>), 2.02 (1H, dtd, *J* 14.7, 4.7, 1.1, 8-H<sub>B</sub>), 1.81 (1H, dt, *J* 14.7, 1.1, 8-H<sub>A</sub>), 1.76-1.70 (1H, m, 6-H<sub>B</sub>). **<sup>13</sup>C NMR** (125 MHz, MeOD-d<sub>4</sub>): δ 95.0 (1-C), 78.0 (7-C), 69.6 (10-C), 68.3 (9-C), 56.2 (4-C), 53.3 (2-C), 43.0 (5-C), 39.0 (8-C), 38.8 (6-C). **IR** ν<sub>max</sub>(film)/cm<sup>-1</sup> 3359 (br. OH), 2952, 2515, 1635, 1428, 1100, 1067, 1035. **HRMS** (ESI): C<sub>9</sub>H<sub>15</sub>NO<sub>3</sub> [M+H]<sup>+</sup>; calculated 186.1125, found 186.1124.

**Benzyl (1R\*,5R\*,7R\*,9S\*,10S\*)-9-[(*tert*-butyldimethylsilyl)oxy]-10-hydroxy-11-oxa-3-azatricyclo[5.3.1.0<sup>1,5</sup>]undecane-3-carboxylate **S50** and benzyl (1R\*,5R\*,7R\*,9S\*,10S\*)-10-[(*tert*-butyldimethylsilyl)oxy]-9-hydroxy-11-oxa-3-azatricyclo[5.3.1.0<sup>1,5</sup>]undecane-3-carboxylate **S51****

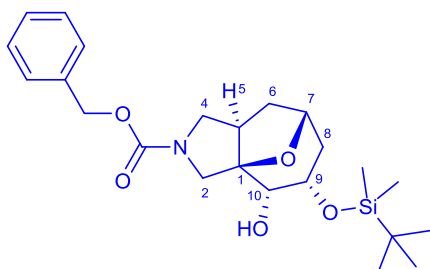

**S50**

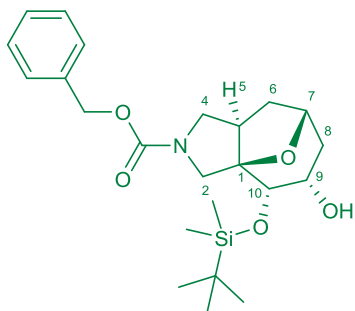

**S51**

NaBH<sub>4</sub> (680 mg, 17.9 mmol, 2.20 eq.) was added to a stirred solution of cycloadduct **2c** (3.50 g, 8.10 mmol, 1.00 eq.) in MeOH (45 mL) at 0 °C. The reaction mixture was stirred at 0 °C for 1 h, then concentrated *in vacuo*. The resulting residue was diluted in EtOAc (50 mL) and washed with brine (50 mL). The aqueous layer was extracted with EtOAc (2 × 25 mL). The combined organics were dried over MgSO<sub>4</sub> and concentrated *in vacuo*. Flash chromatography eluting with 4:1 pentane–EtOAc gave the *title compounds* **S50** and **S51** (1.98 g, 4.57 mmol, 56%, 2:1 mixture of regioisomers) as a colourless oil. *R*<sub>f</sub> 0.15 (4:1 pentane–EtOAc). <sup>1</sup>H NMR (500 MHz, CDCl<sub>3</sub>, 2:1 mixture regioisomers, **characteristic peaks**): δ 7.40-7.27 (5H, m, **major** and **minor** Cbz Ar-H), 5.16-5.07 (2H, m, **major** and **minor** OCH<sub>2</sub>Ph),

4.53-4.43 (1H, m, **major** and **minor** 7-H), 4.19-4.12 (0.66H, m, **major** 9-H), 4.03-3.98 (0.33H, m, **minor** 9-H), 3.97-3.78 (2H, m), 3.74-3.61 (1H, m), 3.60-3.47 (1H, m), 3.22-3.09 (1.33H, m, includes 0.33H, **minor** 5-H), 3.09-2.98 (0.66H, m, **major** 5-H), 2.73-2.63 (1H, m), 2.52 (0.33H, dd, *J* 12.0, 8.4), 2.43-2.33 (0.66H, m), 2.12-1.96 (1H, m), 1.92 (0.33H, d, *J* 14.4), 1.89-1.74 (1.66H, includes at δ 1.78: 0.66H, d, *J* 14.4), 0.98-0.86 (9H, m, SiC<sub>q</sub>(CH<sub>3</sub>)<sub>3</sub>), 0.19-0.04 (6H, m, SiCH<sub>3</sub>). IR ν<sub>max</sub>(film)/cm<sup>-1</sup> 2952, 2929, 2885, 2856, 1687 (CO), 1423, 1116, 1087. HRMS (ESI): C<sub>23</sub>H<sub>36</sub>NO<sub>5</sub>Si [M+H]<sup>+</sup>; calculated 434.2363, found 434.2364.

**(1R\*,5R\*,7R\*,9S\*,10S\*)-9-[(*tert*-Butyldimethylsilyl)oxy]-11-oxa-3-azatricyclo[5.3.1.0<sup>1,5</sup>]undecan-10-ol S52 and (1R\*,5R\*,7R\*,9S\*,10S\*)-10-[(*tert*-butyldimethylsilyl)oxy]-11-oxa-3-azatricyclo[5.3.1.0<sup>1,5</sup>]undecan-9-ol S53**

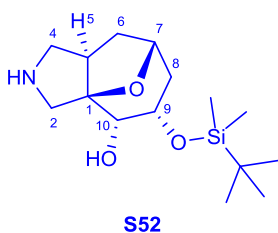

S52

+

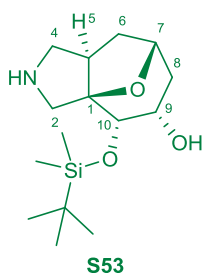

S53

Hydrogenation was carried out following general procedure **B**, using compounds **S50** and **S51** (1.98 g, 4.61 mmol) and Pd/C (200 mg, 10% w/w) in EtOH (40 mL) over 15 h. Filtration followed by concentration gave the *title compounds* **S52** and **S53** (1.36 g, 4.54 mmol, 99%) as a colourless foam which was not purified further. <sup>1</sup>H NMR (500 MHz, CDCl<sub>3</sub>, 2:1 mixture of regioisomers, NH not observed): δ 4.55-4.47 (1H, m, major and minor 7-H), 4.14 (0.66H, t, *J* 4.0, major 9-H), 3.99 (0.33H, t, *J* 4.1, minor 9-H), 3.90 (0.33H, d, *J* 4.1, minor 10-H), 3.74 (0.66H, t, *J* 4.0, major 10-H), 3.65 (0.66H, d, *J* 12.4, major 2-H<sub>A</sub>), 3.56 (0.66H, dd, *J* 11.6, 9.4, major 4-H<sub>B</sub>), 3.47-3.36 (1.33H, m, includes: 0.33H, minor 4-H<sub>B</sub> and at δ 3.41: 1H, d, *J* 12.4, major 2-H<sub>B</sub>), 3.34-3.25 (1H, m, major and minor 5-H), 3.25-3.18 (0.66H, m, includes: 0.33H, minor 4-H<sub>A</sub>; and at δ 3.22: 0.33H, d, *J* 12.4, minor 2-H<sub>A</sub>), 3.14 (0.66H, dd, *J* 11.6, 6.8, major 4-H<sub>A</sub>), 2.87 (0.66H, s, major OH), 2.60-2.53 (0.66H, m, includes at δ 2.56: 0.33H, s, minor OH; and at δ 2.57: 0.33H, dd, *J* 12.4, 8.8, minor 6-H<sub>A</sub>), 2.42 (0.66H, dd, *J* 12.4, 8.8, major 6-H<sub>A</sub>), 2.07 (0.66H, app. dt, *J* 14.8, 4.4, major 8-H<sub>B</sub>), 2.11-1.87 (1.66H, m, includes: 0.33H, minor 8-H<sub>A</sub>; 0.33H, minor 8-H<sub>B</sub>; and, 1H, minor and major 6-H<sub>B</sub>), 1.76 (0.66H, d, *J* 14.8, major 8-H<sub>A</sub>), 0.93 (3H, s, minor SiC<sub>q</sub>(CH<sub>3</sub>)<sub>3</sub>), 0.93 (6H, s, major, SiC<sub>q</sub>(CH<sub>3</sub>)<sub>3</sub>), 0.16 (1H, s, minor SiCH<sub>3</sub>), 0.13 (1H, s, minor SiCH<sub>3</sub>), 0.12 (2H, s, major SiCH<sub>3</sub>), 0.11 (2H, s, major SiCH<sub>3</sub>). <sup>13</sup>C NMR (125 MHz, CDCl<sub>3</sub>, 2:1 mixture of regioisomers): δ 91.9 (major, 1-C), 91.1 (minor, 1-C), 76.6 (7-C, major), 76.2 (minor, 7-C), 69.0 (minor, 10-C), 68.1 (major, 9-C), 67.6 (major, 10-C), 67.3 (minor, 9-C), 53.2 (minor, 4-C), 52.8 (major, 4-C), 50.1 (major, 2-C), 50.1 (minor, 2-C), 40.0 (major and minor, 5-C), 38.2 (minor, 8-C), 38.1 (major, 8-C), 37.0 (major, 6-C), 36.1 (minor, 6-C), 25.2 (major and minor, SiC<sub>q</sub>(CH<sub>3</sub>)<sub>3</sub>), 18.0 (major and minor, 2 peaks, SiC<sub>q</sub>), -4.5 (minor, SiCH<sub>3</sub>), -4.6 (major, SiCH<sub>3</sub>), -4.7 (minor, SiCH<sub>3</sub>), -5.2 (major, SiCH<sub>3</sub>). IR  $\nu_{\max}$ (film)/cm<sup>-1</sup> 3352 (br. s, OH), 2951, 2928, 2891, 2856, 1252, 1109, 1084. HRMS (ESI): C<sub>15</sub>H<sub>30</sub>NO<sub>3</sub>Si [M+H]<sup>+</sup>; calculated 300.1995, found 300.1993.



**(1R\*,5R\*,7R\*,9S\*,10S\*)-3-(2-Methylpropyl)-11-oxa-3-azatricyclo[5.3.1.0<sup>1,5</sup>]undecane-9,10-diol**

**F41**

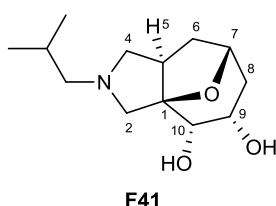

Reductive amination was carried out by following general procedure **C**, using amines **S52** and **S53** (300 mg, 1.00 mmol) and isobutyraldehyde (2.5 eq.). The reaction mixture was partitioned between EtOAc (25 mL) and brine (25 mL). The phases were separated and the aqueous phase was extracted with EtOAc (2 × 25 mL). The combined organic phases were dried over

MgSO<sub>4</sub>, filtered and concentrated *in vacuo* to give a colourless oil (290 mg). O-Silyl deprotection was carried out by following general procedure **G**, using the crude residue and (±)-camphorsulfonic acid (4.0 eq.). Flash chromatography eluting with 93:7:1 CH<sub>2</sub>Cl<sub>2</sub>–EtOH–NH<sub>3</sub>/MeOH gave the *title compound* **F41** (185 mg, 0.77 mmol, 77%) as a colourless oil. *R<sub>f</sub>* 0.18 (50:8:1 CH<sub>2</sub>Cl<sub>2</sub>–EtOH–NH<sub>3</sub>/MeOH). <sup>1</sup>H NMR (500 MHz, CDCl<sub>3</sub>, one OH not observed): δ 4.50–4.45 (1H, m, 7-H), 4.13 (1H, app. t, *J* 4.4, 9-H), 3.80 (1H, d, *J* 4.8, 10-H), 3.25–3.17 (2H, m, includes: 1H, 5-H; and at δ 3.23: 1H, d, *J* 10.6, NCH<sub>A</sub>H<sub>B</sub>CH(CH<sub>3</sub>)<sub>2</sub>), 3.02 (1H, app. t, *J* 8.1, 4-H<sub>A</sub>), 2.60 (1H, s, OH), 2.43 (1H, d, *J* 10.6, NCH<sub>A</sub>H<sub>B</sub>CH(CH<sub>3</sub>)<sub>2</sub>), 2.35–2.19 (4H, m, 2-H, 4-H<sub>B</sub>, 6-H<sub>A</sub>), 2.06 (1H, dt, *J* 14.8, 4.8, 8-H<sub>B</sub>), 1.85 (1H, app. d, *J* 14.7, 8-H<sub>A</sub>), 1.81–1.69 (2H, m, 6-H<sub>B</sub> and CH(CH<sub>3</sub>)<sub>2</sub>), 0.93 (3H, d, *J* 6.6, CH(CH<sub>3</sub>)<sub>A</sub>), 0.91 (3H, d, *J* 6.6, CH(CH<sub>3</sub>)<sub>B</sub>). <sup>13</sup>C NMR (125 MHz, CDCl<sub>3</sub>): δ 91.7 (1-C), 77.4 (7-C), 70.1 (10-C), 67.5 (9-C), 64.8 (2-C), 62.3 (4-C), 60.9 (NCH<sub>2</sub>CH(CH<sub>3</sub>)<sub>3</sub>), 41.4 (5-C), 37.8 (8-C), 34.8 (6-C), 27.3 (CH(CH<sub>3</sub>)<sub>2</sub>), 21.3 (CH(CH<sub>3</sub>)<sub>A</sub>), 21.2 (CH(CH<sub>3</sub>)<sub>B</sub>). IR *v*<sub>max</sub>(film)/cm<sup>-1</sup> 3398 (br. OH), 2951, 2807, 1467, 1074, 1047, 1034. HRMS (ESI): C<sub>13</sub>H<sub>24</sub>NO<sub>3</sub> [M+H]<sup>+</sup>; calculated 242.1756, found 242.1754.

**(1R\*,5R\*,7R\*,9S\*,10S\*)-9-[(*tert*-Butyldimethylsilyl)oxy]-3-(1,3-thiazol-2-ylmethyl)-11-oxa-3-azatricyclo[5.3.1.0<sup>1,5</sup>]undecan-10-ol S54**

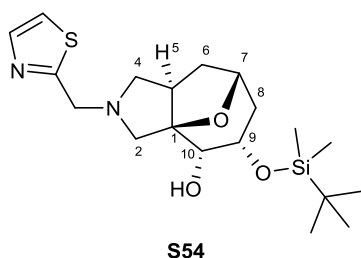

Reductive amination was carried out by following general procedure **C**, using amines **S52** and **S53** (304 mg, 1.02 mmol) and 1,3-thiazolecarbaldehyde (2.5 eq.). The reaction mixture was partitioned between EtOAc (25 mL) and brine (25 mL). The phases were separated and the aqueous phase was extracted with EtOAc (2 × 25 mL). The

combined organic phases were dried over MgSO<sub>4</sub>, filtered and concentrated *in vacuo*.<sup>\*</sup> Flash chromatography eluting with 1:1 pentane–EtOAc gave the *title compound* **S54** (177 mg, 0.45 mmol, 44%, single regioisomer) as a colourless oil. *R<sub>f</sub>* 0.28 (1:1 pentane–EtOAc). <sup>1</sup>H NMR (500 MHz, CDCl<sub>3</sub>): δ 7.70 (1H, d, *J* 3.4, thiazole 4-H), 7.26 (1H, d, *J* 3.4, thiazole 5-H), 4.47–4.43 (1H, m, 7-H),

<sup>\*</sup> The crude product was a 2:1 mixture of regioisomers (as judged by analysis of the crude residue by NMR spectroscopy at 300 Hz).

4.13 (1H, app. t,  $J$  4.2, 9-H), 4.08 (1H, d,  $J$  14.7, 2-H<sub>A</sub>), 4.01 (1H, d,  $J$  14.7, 2-H<sub>B</sub>), 3.74-3.64 (1H, m, 10-H), 3.29 (1H, d,  $J$  10.4, NCH<sub>A</sub>H<sub>B</sub>Ar), 3.12-3.01 (2H, m, 5-H and 4-H<sub>A</sub>), 2.72-2.60 (2H, m, includes: 1H, OH; and at  $\delta$  2.69: 1H, d,  $J$  10.4, NCH<sub>A</sub>H<sub>B</sub>Ar), 2.52 (1H, app. t,  $J$  7.5, 4-H<sub>B</sub>), 2.23 (1H, dd,  $J$  12.2, 8.3, 6-H<sub>A</sub>), 2.11-2.04 (1H, m, 8-H<sub>B</sub>), 1.83-1.70 (2H, m, 6-H<sub>B</sub> and at  $\delta$  1.75: 1H, d,  $J$  14.7, 8-H<sub>A</sub>), 0.94 (9H, s, SiC(CH<sub>3</sub>)<sub>3</sub>), 0.12 (3H, s, SiCH<sub>3</sub>), 0.11 (3H, s, SiCH<sub>3</sub>). **<sup>13</sup>C NMR** (125 MHz, CDCl<sub>3</sub>):  $\delta$  169.6 (thiazole 2-C), 142.3 (thiazole 4-C), 119.5 (thiazole 5-C), 92.7 (1-C), 76.6 (7-C), 69.1 (9-C or 10-C), 68.9 (9-C or 10-C), 61.5 (4-C), 59.8 (NCH<sub>2</sub>Ar), 56.6 (2-C), 41.0 (5-C), 38.8 (8-C), 35.5 (6-C), 26.0 (SiC<sub>q</sub>(CH<sub>3</sub>)<sub>3</sub>), 18.1 (SiC<sub>q</sub>), -4.4 (SiCH<sub>3</sub>), -5.1 (SiCH<sub>3</sub>). **IR**  $\nu_{\text{max}}$ (film)/cm<sup>-1</sup> 2950, 2929, 2855, 1253, 1097, 1061, 934, 836. **HRMS** (ESI): C<sub>19</sub>H<sub>33</sub>N<sub>2</sub>O<sub>3</sub>SSi [M+H]<sup>+</sup>; calculated 397.1981, found 397.1986.

**(1R\*,5R\*,7R\*,9S\*,10S\*)-3-(1,3-thiazol-2-ylmethyl)-11-oxa-3-azatricyclo[5.3.1.0<sup>1,5</sup>]undecane-9,10-diol F42**

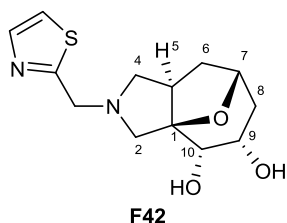

O-Silyl deprotection was carried out by following general procedure **G**, using compound **S54** (177 mg, 0.44 mmol) and (±)-camphorsulfonic acid (10.0 eq.) over 2.5 days. Flash chromatography eluting with 93:7:1 CH<sub>2</sub>Cl<sub>2</sub>-EtOH-NH<sub>3</sub>/MeOH gave the *title compound* **F42** (126 mg, 0.44 mmol, 99%) as a pale yellow foam.  $R_f$  0.13 (93:7:1 CH<sub>2</sub>Cl<sub>2</sub>-EtOH-NH<sub>3</sub>/MeOH). **<sup>1</sup>H NMR** (500 MHz, CDCl<sub>3</sub>, one OH not observed):  $\delta$  7.72 (1H, d,  $J$  3.2, thiazole 4-H), 7.28 (1H, d,  $J$  3.2, thiazole 5-H), 4.52-4.45 (1H, m, 7-H), 4.14 (1H, app. t,  $J$  4.3, 9-H), 4.09 (1H, d,  $J$  14.7, 2-H<sub>A</sub>), 3.98 (1H, d,  $J$  14.7, 2-H<sub>B</sub>), 3.80 (1H, d,  $J$  4.5, 10-H), 3.28 (1H, d,  $J$  10.6, NCH<sub>A</sub>H<sub>B</sub>Ar), 3.26-3.20 (1H, m, 5-H), 3.10 (1H, app. t,  $J$  8.3, 4-H<sub>A</sub>), 2.88 (1H, s, OH), 2.65 (1H, d,  $J$  10.6, NCH<sub>A</sub>H<sub>B</sub>Ar), 2.46 (1H, app. t,  $J$  8.3, 4-H<sub>B</sub>), 2.29 (1H, dd,  $J$  12.2, 8.8, 6-H<sub>A</sub>), 2.07 (1H, dt,  $J$  14.7, 4.5, 8-H<sub>B</sub>), 1.85 (1H, d,  $J$  14.7, 8-H<sub>A</sub>), 1.82-1.76 (1H, m, 6-H<sub>B</sub>). **<sup>13</sup>C NMR** (125 MHz, CDCl<sub>3</sub>):  $\delta$  169.4 (thiazole 2-C), 142.5 (thiazole 4-C), 119.5 (thiazole 5-C), 92.1 (1-C), 77.3 (7-C), 69.9 (10-C), 67.6 (9-C), 61.6 (4-C), 60.2 (NCH<sub>2</sub>Ar), 56.5 (2-C), 41.6 (5-C), 37.8 (8-C), 35.1 (6-C). **IR**  $\nu_{\text{max}}$ (film)/cm<sup>-1</sup> 3375 (br. OH), 2942, 2821, 1505, 1075, 1051, 1034. **HRMS** (ESI): C<sub>13</sub>H<sub>19</sub>N<sub>2</sub>O<sub>3</sub>S [M+H]<sup>+</sup>; calculated 283.1116, found 283.1111.

**(1R\*,5R\*,7R\*,9S\*,10S\*)-3-Cyclobutanecarbonyl-11-oxa-3-azatricyclo[5.3.1.0<sup>1,5</sup>]undecane-9,10-diol F43**

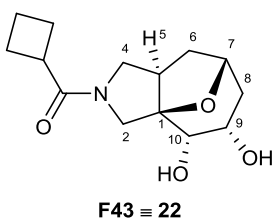

Cyclobutanecarbonyl chloride (0.57 mL, 5.00 mmol, 5.00 eq.) was added to a stirred solution of amines **S52** and **S53** (300 mg, 1.00 mmol, 1.00 eq., 2:1 mixture of regioisomers) in pyridine (10 mL) at 0 °C. The reaction mixture was warmed to rt then stirred for 15 h. Further cyclobutanecarbonyl chloride

(0.21 mL, 1.83 mmol, 2.50 eq.) was added and the reaction mixture was stirred for 1 h. The reaction mixture was concentrated *in vacuo*, then partitioned between EtOAc (25 mL) and sat. aq. NaHCO<sub>3</sub> solution (25 mL). The phases were separated and the aqueous phase was extracted with EtOAc (2 × 25 mL). The combined organic phases were dried over MgSO<sub>4</sub>, filtered and concentrated *in vacuo*. Flash chromatography eluting with 1:9 pentane–EtOAc was used to isolate fractions with  $R_f = 0.48$ , giving a colourless oil (240 mg) {**LRMS** (HPLC-MS): C<sub>25</sub>H<sub>41</sub>NO<sub>5</sub>Si; found 463.9 [M<sup>+</sup>], consistent with the diacetylated product}. The residue (240 mg, [estimate 0.52 mmol], 1.00 eq) was diluted in MeOH (10 mL) and NaOMe (25 wt% in MeOH, 0.60 mL, 2.50 mmol, 5.00 eq.) was added. The reaction mixture was stirred for 1 h at rt, then concentrated *in vacuo*. The residue was diluted in CH<sub>2</sub>Cl<sub>2</sub> (25 mL) and washed with H<sub>2</sub>O (25 mL). The phases were separated and the aqueous phase was extracted with CH<sub>2</sub>Cl<sub>2</sub> (2 × 10 mL). The combined organic phases were dried over MgSO<sub>4</sub>, filtered and concentrated *in vacuo* to give a colourless oil (190 mg). The residue was diluted in MeOH (10 mL) and (±)-camphorsulfonic acid (465 mg, 2.00 mmol, 4.00 eq.) was added. The reaction mixture heated at 45 °C for 15 h, then concentrated *in vacuo*. Flash chromatography eluting with 93:7:1 CH<sub>2</sub>Cl<sub>2</sub>–EtOH–NH<sub>3</sub>/MeOH gave the *title compound* **F43** (102 mg, 0.38 mmol, 38% [three steps]) as a colourless oil.  $R_f$  0.38 (50:8:1 CH<sub>2</sub>Cl<sub>2</sub>–EtOH–NH<sub>3</sub>/MeOH). **<sup>1</sup>H NMR** (500 MHz, CDCl<sub>3</sub>, 60:40 mixture of rotamers): δ 4.52-4.47 (1H, m, 7-H), 4.34-4.24 (0.6H, s, OH), 4.22-4.18 (0.4H, m, 9-H), 4.16 (0.6H, app. t,  $J$  4.3, 9-H), 4.04 (0.4H, dd,  $J$  11.9, 9.6, 4-H<sub>B</sub>), 3.99 (0.6H, d,  $J$  13.5, 2-H<sub>A</sub>), 3.88-3.74 (2H, m, includes: 0.4H, 2-H<sub>A</sub>; 0.6H, 4-H<sub>B</sub>; and 1H, 10-H), 3.56 (0.6H, d,  $J$  12.6, 2-H<sub>B</sub>), 3.46 (0.4H, d,  $J$  12.6, 2-H<sub>B</sub>), 3.27-3.01 (3.4H, m, includes: 1H, 4-H<sub>A</sub>; 1H, 5-H; 1H, cyclobutyl 1-H; and 0.4H, OH), 2.76 (0.6H, s, OH), 2.51 (1H, td,  $J$  12.1, 8.4, 6-H<sub>A</sub>), 2.39 (0.4H, s, OH), 2.37-2.25 (2H, m, cyclobutyl 2-H), 2.19-2.02 (3H, m, includes: 1H, 8-H<sub>A</sub>; and 2H, cyclobutyl 2-H), 2.00-1.76 (4H, m, includes: 1H, 6-H<sub>B</sub>; 1H, 8-H<sub>B</sub>; and 2H, cyclobutyl 3-H). **<sup>13</sup>C NMR** (125 MHz, CDCl<sub>3</sub>): δ 173.3 (major and minor, N(CO)CH), 92.6 (minor, 1-C), 90.7 (major, 1-C), 76.6 (major, 7-C), 76.4 (minor, 7-C), 68.3 (minor, 10-C), 67.5 (major, 10-C), 67.4 (major, 9-C), 67.2 (minor, 9-C), 54.7 (major, 4-C), 54.4 (minor, 4-C), 51.7 (major, 2-C), 51.4 (minor, 2-C), 41.1 (major and minor, 5-C), 39.0 (minor, cyclobutyl 1-C), 38.2 (minor, 8-C), 38.1 (major, cyclobutyl 1-C), 37.2 (2 peaks: minor, 6-C and major, 8-C), 36.4 (major, 6-C), 24.9 (minor, cyclobutyl 2-C), 24.7 (major, cyclobutyl 2-C), 24.6 (major, cyclobutyl 2-C'), 24.5 (minor, cyclobutyl 2-C'), 18.0 (major and minor, cyclobutyl 3-C). **IR**  $\nu_{\max}$ (film)/cm<sup>-1</sup> 3359 (br. OH), 2945, 2878, 1615 (CO), 1451, 1220, 1078, 1052. **HRMS** (ESI): C<sub>14</sub>H<sub>22</sub>NO<sub>4</sub> [M+H]<sup>+</sup>; calculated 268.1549, found 268.1543.

**(1R\*,5R\*,7R\*,9S\*,10S\*)-3-(pyridin-2-yl)-11-oxa-3-azatricyclo[5.3.1.0<sup>1,5</sup>]undecane-9,10-diol **F44****

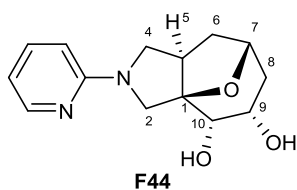

2-Fluoropyridine (74  $\mu\text{L}$ , 0.84 mmol, 1.0 eq.) was added to a stirred solution of amines **S52** and **S53** (256 mg, 0.84 mmol, 1.00 eq., 2:1 mixture of regioisomers) and DIPEA (18  $\mu\text{L}$ , 1.20 mmol, 1.20 eq.) in DMA (5.0 mL). The reaction mixture was heated at 120  $^{\circ}\text{C}$  for 15 h. The reaction mixture was concentrated *in vacuo*, then partitioned between EtOAc (25 mL) and sat. aq.  $\text{NaHCO}_3$  solution (25 mL). The phases were separated and the aqueous phase was extracted with EtOAc (2  $\times$  25 mL). The combined organic phases were dried over  $\text{MgSO}_4$ , filtered and concentrated *in vacuo*. *O*-Silyl deprotection was carried out by following general procedure **G**, using the the crude residue (130 mg) and ( $\pm$ )-camphorsulfonic acid (2.7 eq.). Flash chromatography eluting with 90:9:1  $\text{CH}_2\text{Cl}_2$ -EtOH- $\text{NH}_3$ /MeOH gave the *title compound* **F44** (43 mg, 0.16 mmol, 20% [two steps]) as a colourless amorphous solid.  $R_f$  0.17 (2:1  $\text{CH}_2\text{Cl}_2$ -“Mixture-A”).  $^1\text{H NMR}$  (500 MHz,  $\text{CDCl}_3$ , 2  $\times$  OH not observed):  $\delta$  8.02 (1H, dd,  $J$  5.3, 1.5, pyridine 6-H), 7.44 (1H, ddd,  $J$  8.8, 6.9, 1.5, pyridine 4-H), 6.53 (1H, dd,  $J$  6.9, 5.3, pyridine 5-H), 6.36 (1H, d,  $J$  8.8, pyridine 3-H), 4.52 (1H, dd,  $J$  7.4, 4.4, 7-H), 4.14 (1H, app. t,  $J$  4.4, 9-H), 4.08 (1H, d,  $J$  11.8, 2- $\text{H}_A$ ), 3.96 (1H, d,  $J$  4.7, 10-H), 3.88 (1H, t,  $J$  9.5, 4- $\text{H}_A$ ), 3.69 (1H, d,  $J$  11.8, 2- $\text{H}_B$ ), 3.40-3.32 (1H, m, 5-H), 3.20 (1H, dd,  $J$  9.5, 8.4, 4- $\text{H}_B$ ), 2.62 (1H, dd,  $J$  12.2, 8.5, 8- $\text{H}_B$ ), 2.06 (1H, dt,  $J$  14.5, 4.4, 6- $\text{H}_A$ ), 1.99-1.92 (2H, m, 6- $\text{H}_B$  and 8- $\text{H}_A$ ).  $^{13}\text{C NMR}$  (125 MHz,  $\text{CDCl}_3$ ):  $\delta$  156.9 (pyridine 2-C), 147.2 (pyridine 6-C), 137.7 (pyridine 4-C), 111.7 (pyridine 5-C), 107.6 (pyridine 3-C), 91.8 (1-C), 76.6 (7-C), 67.7 (9-C or 10-C), 67.5 (9-C or 10-C), 56.4 (4-C), 53.1 (2-C), 40.7 (5-C), 37.5 (8-C), 37.2 (6-C).  $\text{IR } \nu_{\text{max}}(\text{film})/\text{cm}^{-1}$  3391 (br. OH), 2944, 2870, 1601, 1556, 1499, 1474, 1445.  $\text{HRMS}$  (ESI):  $\text{C}_{13}\text{H}_{19}\text{N}_2\text{O}_3\text{S}$   $[\text{M}+\text{H}]^+$ ; calculated 263.1396, found 263.1395.

### 5.4.3.20 Preparation of fragments derived from scaffold S27

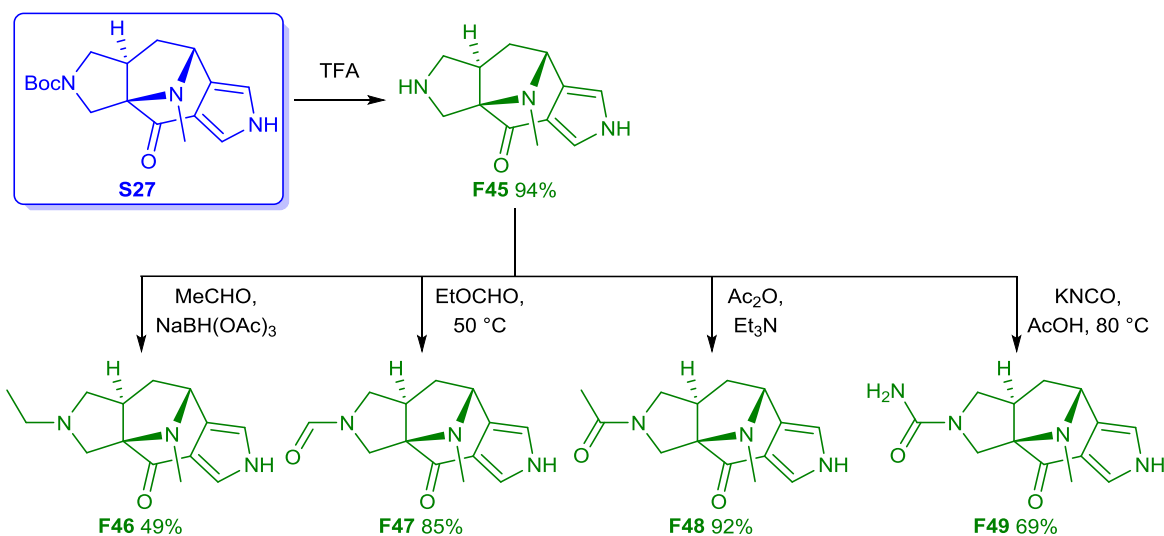

#### (1*R*\*,8*R*\*,10*R*\*)-14-methyl-5,12,14-triazatetracyclo[6.5.1.0<sup>1,10</sup>.0<sup>3,7</sup>]tetradeca-3,6-dien-2-one F45

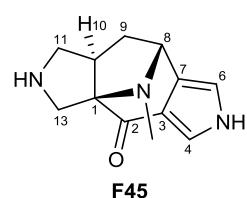

Deprotection of Boc-protected compound **S27** (1.71 g, 5.39 mmol) was carried out by following general procedure I. Purification by SCX SPE eluting with MeOH, then sat. NH<sub>3</sub>/MeOH, gave the *title compound* **F45** (1.10 g, 5.06 mmol, 94%) as a yellow solid. **Mp**: Decomposition observed above 180 °C. **<sup>1</sup>H NMR** (500 MHz, MeOD-d<sub>4</sub>, 333 K): δ 7.34 (1H, s, 4-H), 6.62 (1H, s, 6-H), 4.32 (1H, d, *J* 4.5, 8-H), 3.43 (1H, d, *J* 12.4, 13-H<sub>A</sub>), 3.31 (1H, br. s, NH), 3.08 (1H, dd, *J* 11.1, 8.7, 11-H<sub>B</sub>), 2.84 (1H, dd, *J* 11.1, 4.6, 11-H<sub>A</sub>), 2.75 (1H, d, *J* 12.4, 13-H<sub>B</sub>), 2.64-2.49 (1H, m, 10-H), 2.22 (3H, s, NCH<sub>3</sub>), 2.08-2.00 (1H, m, 9-H<sub>A</sub>), 1.97 (1H, app. t, *J* 10.0, 9-H<sub>B</sub>). **<sup>13</sup>C NMR** (125 MHz, MeOD-d<sub>4</sub>, 333 K): δ 196.0, 128.4, 121.0, 119.5, 115.4, 83.4, 63.4, 54.2, 50.2, 48.3, 39.2, 33.0. **IR**  $\nu_{\text{max}}$ (film)/cm<sup>-1</sup> 2860, 1654, 1520, 1480, 1446, 1350, 1179, 902. **HRMS** (ESI): C<sub>12</sub>H<sub>16</sub>N<sub>3</sub>O [M+H]<sup>+</sup>; calculated 218.1288, found 218.1291.

**<sup>1</sup>H NMR** (500 MHz, MeOD-d<sub>4</sub>, 333 K): δ 7.34 (1H, s, 4-H), 6.62 (1H, s, 6-H), 4.32 (1H, d, *J* 4.5, 8-H), 3.43 (1H, d, *J* 12.4, 13-H<sub>A</sub>), 3.31 (1H, br. s, NH), 3.08 (1H, dd, *J* 11.1, 8.7, 11-H<sub>B</sub>), 2.84 (1H, dd, *J* 11.1, 4.6, 11-H<sub>A</sub>), 2.75 (1H, d, *J* 12.4, 13-H<sub>B</sub>), 2.64-2.49 (1H, m, 10-H), 2.22 (3H, s, NCH<sub>3</sub>), 2.08-2.00 (1H, m, 9-H<sub>A</sub>), 1.97 (1H, app. t, *J* 10.0, 9-H<sub>B</sub>). **<sup>13</sup>C NMR** (125 MHz, MeOD-d<sub>4</sub>, 333 K): δ 196.0, 128.4, 121.0, 119.5, 115.4, 83.4, 63.4, 54.2, 50.2, 48.3, 39.2, 33.0. **IR**  $\nu_{\text{max}}$ (film)/cm<sup>-1</sup> 2860, 1654, 1520, 1480, 1446, 1350, 1179, 902. **HRMS** (ESI): C<sub>12</sub>H<sub>16</sub>N<sub>3</sub>O [M+H]<sup>+</sup>; calculated 218.1288, found 218.1291.

#### (1*R*\*,8*R*\*,10*R*\*)-12-Ethyl-14-methyl-5,12,14-triazatetracyclo[6.5.1.0<sup>1,10</sup>.0<sup>3,7</sup>]tetradeca-3,6-dien-2-one F46

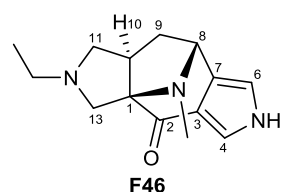

Reductive amination was carried out by following general procedure C, using compound **F45** (151 mg, 0.70 mmol) and acetaldehyde (5.0 M in THF, 2.0 eq.). The reaction was quenched with H<sub>2</sub>O (5 mL) and the layers separated. The aqueous layer was extracted with CH<sub>2</sub>Cl<sub>2</sub> (2 x 10 mL) and the combined organic layers were dried, filtered and concentrated *in vacuo* to give a crude oil. The crude material was purified by SCX SPE eluting with MeOH, then sat. NH<sub>3</sub>/MeOH, to give the *title compound* **F46** (83 mg, 0.34 mmol, 49%) as a yellow oil. **<sup>1</sup>H NMR** (500 MHz, MeOD-d<sub>4</sub>, 333 K, NH not observed):

The reaction was quenched with H<sub>2</sub>O (5 mL) and the layers separated. The aqueous layer was extracted with CH<sub>2</sub>Cl<sub>2</sub> (2 x 10 mL) and the combined organic layers were dried, filtered and concentrated *in vacuo* to give a crude oil. The crude material was purified by SCX SPE eluting with MeOH, then sat. NH<sub>3</sub>/MeOH, to give the *title compound* **F46** (83 mg, 0.34 mmol, 49%) as a yellow oil. **<sup>1</sup>H NMR** (500 MHz, MeOD-d<sub>4</sub>, 333 K, NH not observed):

$\delta$  7.36 (1H, app. t,  $J$  1.6, 4-H), 6.63 (1H, d,  $J$  1.5, 6-H), 4.33 (1H, dd,  $J$  5.5, 8-H), 3.60 (1H, d,  $J$  10.0, 13-H<sub>A</sub>), 3.01 (1H, dd,  $J$  8.6, 7.8, 11-H<sub>B</sub>), 2.67-2.47 (4H, m, 10-H, 11-H<sub>A</sub> and NCH<sub>2</sub>CH<sub>3</sub>), 2.30 (1H, d,  $J$  10.0, 13-H<sub>B</sub>), 2.21 (3H, s, NCH<sub>3</sub>), 2.10 (1H, app. td,  $J$  11.3, 5.5, 9-H<sub>A</sub>), 1.89 (1H, dd,  $J$  11.5, 8.7, 9-H<sub>B</sub>), 1.15 (3H, t,  $J$  7.3, NCH<sub>2</sub>CH<sub>3</sub>). **<sup>13</sup>C NMR** (125 MHz, MeOD-d<sub>4</sub>, 333 K):  $\delta$  194.9, 126.9, 119.9, 117.7, 113.8, 80.2, 62.5, 60.0, 54.5, 49.9, 47.6, 36.2, 31.7, 12.0. **IR**  $\nu_{\text{max}}$ (film)/cm<sup>-1</sup> 3197, 2967, 2937, 1667, 1516, 1451. **HRMS** (ESI): C<sub>14</sub>H<sub>20</sub>N<sub>3</sub>O [M+H]<sup>+</sup>; calculated 246.1601, found 246.1602.

**(1*R*\*,8*R*\*,10*R*\*)-14-Methyl-2-oxo-5,12,14-triazatetracyclo[6.5.1.0<sup>1,10</sup>.0<sup>3,7</sup>]tetradeca-3,6-diene-12-carbaldehyde F47**

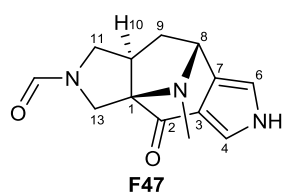

To a solution of compound **F45** (100 mg, 0.46 mmol) in MeOH (0.5 mL) was added ethyl formate (3.0 mL) and the resulting solution was heated to 50 °C for 24 h, then concentrated *in vacuo* to give formamide **F47** (96 mg, 0.39 mmol, 85%) as a yellow oil. **<sup>1</sup>H NMR** (500 MHz, MeOD-d<sub>4</sub>, 333 K, two stable conformations observed at the pyrrolidine ring [50:50 mixture], NH not observed):  $\delta$  8.04-8.00 (1H, m, CHO), 7.31-7.26 (1H, m, 4-H), 6.57-6.53 (1H, m, 6-H), 4.28 (0.5H, d,  $J$  9.1, 8-H), 4.27 (0.5H, d,  $J$  9.1, 8-H), 4.23 (0.5H, d,  $J$  12.1, 13-H<sub>A-conf1</sub>), 4.21 (0.5H, d,  $J$  13.1, 13-H<sub>A-conf2</sub>), 3.93 (0.5H, dd,  $J$  10.9, 9.0, 11-H<sub>B-conf1</sub>), 3.74 (0.5H,  $J$  12.1, 9.4, 11-H<sub>B-conf2</sub>), 3.47 (0.5H,  $J$  12.1, 13-H<sub>B-conf1</sub>), 3.42 (0.5H, dd,  $J$  10.9, 7.7, 11-H<sub>A-conf1</sub>), 3.37 (1H, dd,  $J$  12.1, 6.5, 11-H<sub>A-conf2</sub>), 3.31 (0.5H, d,  $J$  13.2, 13-H<sub>B-conf2</sub>), 2.66-2.57 (1H, m, 10-H), 2.15 (1.5H, s, NCH<sub>3</sub>), 2.14 (1.5H, s, NCH<sub>3</sub>), 2.08-1.99 (1H, m, 9-H<sub>A</sub>), 1.93 (0.5H, dd,  $J$  11.9, 9.0, 9-H<sub>B-conf(1 or 2)</sub>), 1.88 (0.5H, dd,  $J$  12.1, 8.7, 9-H<sub>B-conf(1 or 2)</sub>). **<sup>13</sup>C NMR** (125 MHz, MeOD-d<sub>4</sub>, 333 K):  $\delta$  194.4, 194.2, 163.3, 163.0, 128.7, 128.6, 121.8, 121.7, 118.7, 118.6, 115.3, 115.2, 81.6, 81.3, 63.3, 63.1, 54.6, 51.1, 47.8, 47.6, 47.4, 44.8, 39.9, 38.7, 33.1, 33.0 [26 of 26 expected peaks observed]. **HRMS** (ESI): C<sub>13</sub>H<sub>15</sub>N<sub>3</sub>NaO<sub>2</sub> [M+H]<sup>+</sup>; calculated 268.1056, found 268.1054.

**(1*R*\*,8*R*\*,10*R*\*)-12-Acetyl-14-methyl-5,12,14-triazatetracyclo[6.5.1.0<sup>1,10</sup>.0<sup>3,7</sup>]tetradeca-3,6-diene-2-one F48**

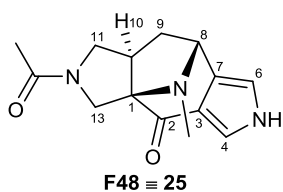

*N*-Acylation was carried out by following general procedure **E**, using compound **F45** (155 mg, 0.71 mmol). CH<sub>2</sub>Cl<sub>2</sub> (10 mL) and H<sub>2</sub>O (10 mL) were added and the phases separated. The aqueous layer was extracted with CH<sub>2</sub>Cl<sub>2</sub> (2 x 10 mL) and the combined organic layers were dried over MgSO<sub>4</sub>, filtered and concentrated *in vacuo* to give a crude brown oil. Flash chromatography eluting with 80:10:1 CH<sub>2</sub>Cl<sub>2</sub>-EtOH-NH<sub>4</sub>OH gave the *title compound* **F48** (172 mg, 0.66 mmol, 93%) as a brown oil. **<sup>1</sup>H NMR** (400 MHz, MeOD-d<sub>4</sub>, 333 K, two stable conformations observed at the pyrrolidine ring

[50:50 mixture], NH not observed):  $\delta$  7.44-7.37 (1H, m, 4-H), 6.70-6.60 (1H, m, 6-H), 4.45 (0.5H, d,  $J$  12.0, 13-H<sub>A-conf1</sub>), 4.41 (0.5H, app. s, 8-H), 4.39 (0.5H, app. s, 8-H), 4.32 (0.5H, d,  $J$  13.4, 13-H<sub>A-conf2</sub>), 4.11-4.00 (1H, m, 11-H<sub>B</sub>), 3.57-3.47 (1.5H, m, 11-H<sub>A</sub> and 13-H<sub>B</sub>), 3.41 (0.5H, dd,  $J$  12.0, 7.7, 11-H<sub>A</sub>), 2.83 (0.5H, ddd,  $J$  17.0, 9.0, 4.6, 10-H), 2.72 (0.5H, ddd,  $J$  16.9, 8.9, 4.7, 10-H), 2.28 (1.5H, s, NCH<sub>3</sub>), 2.26 (1.5H, s, NCH<sub>3</sub>), 2.26-2.13 (1H, m, 9-H<sub>A</sub>), 2.12 (1.5H, s, N(CO)CH<sub>3</sub>), 2.07 (1.5H, s, N(CO)CH<sub>3</sub>), 2.01 (1H, dd,  $J$  12.1, 8.8, 9-H<sub>B</sub>). **<sup>13</sup>C NMR** (100 MHz, MeOD-d<sub>4</sub>, 333 K):  $\delta$  192.6, 192.5, 175.0, 170.5, 127.4, 120.6 (2 peaks), 116.9, 113.8 (2 peaks), 81.3, 79.8, 61.7, 61.6, 55.0, 54.5, 47.5, 46.4, 45.7, 45.1, 38.3, 38.2, 31.7 (2 peaks), 20.7, 20.6 [26 of 28 expected peaks observed]. **HRMS** (ESI): C<sub>14</sub>H<sub>18</sub>N<sub>3</sub>O<sub>2</sub> [M+H]<sup>+</sup>; calculated 260.1394, found 260.1394.

**(1*R*\*,8*R*\*,10*R*\*)-14-Methyl-2-oxo-5,12,14-triazatetracyclo[6.5.1.0<sup>1,10</sup>.0<sup>3,7</sup>]tetradeca-3,6-diene-12-carboxamide **F49****

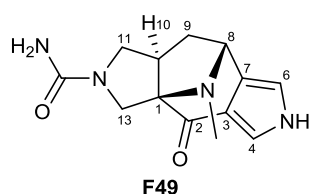

To a solution of compound **F45** (128 mg, 0.59 mmol, 1.00 eq.) in 1:1 dioxane–H<sub>2</sub>O (5.0 mL) was added AcOH (0.10 mL, 1.77 mmol, 3.00 eq.) followed by KNCO (72 mg, 0.88 mmol, 1.50 eq.) and the resulting solution was stirred at 80 °C for 24 h. H<sub>2</sub>O (5 mL) and EtOAc (5 mL) were added

and the phases separated. The aqueous phase was extracted with EtOAc (2 x 5 mL) and the combined organic layers were dried over MgSO<sub>4</sub>, filtered and concentrated *in vacuo* to give the *title compound* **F49** (106 mg, 0.41 mmol, 69%) as a yellow oil. **<sup>1</sup>H NMR** (500 MHz, MeOD-d<sub>4</sub>, 333 K, pyrrole NH and NH<sub>2</sub> not observed):  $\delta$  7.42 (1H, d,  $J$  1.3, 4-H), 6.68 (1H, d,  $J$  1.3, 6-H), 4.41 (1H, d,  $J$  5.9, 8-H), 4.30 (1H, d,  $J$  11.7, 13-H<sub>A</sub>), 3.94 (1H, app. t,  $J$  9.8, 11-H<sub>A</sub>), 3.43-3.31 (2H, m, 11-H<sub>B</sub> and 13-H<sub>B</sub>), 2.83-2.71 (1H, m, 10-H), 2.27 (3H, s, NCH<sub>3</sub>), 2.25-2.15 (1H, m, 9-H<sub>A</sub>), 2.01 (1H, dd,  $J$  12.0, 8.8, 9-H<sub>B</sub>). **<sup>13</sup>C NMR** (125 MHz, MeOD-d<sub>4</sub>, 333 K):  $\delta$  192.9, 159.1, 127.4, 121.5, 117.0, 113.8, 81.0, 61.7, 53.5, 46.1, 38.1, 31.7, 21.4. **IR**  $\nu_{\text{max}}$ (film)/cm<sup>-1</sup> 3357, 2922, 2852, 1631, 1588, 1458.

#### 5.4.3.21 Preparation of fragments derived from scaffold S32

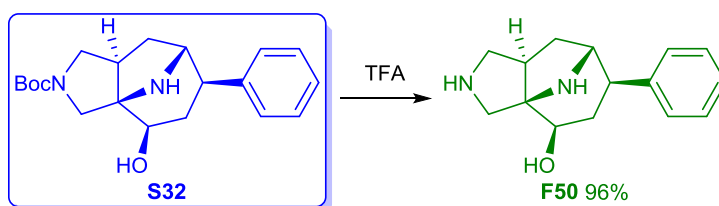

#### (1*R*\*,5*R*\*,7*R*\*,8*R*\*,10*R*\*)-8-Phenyl-3,11-diazatricyclo[5.3.1.0<sup>1,5</sup>]undecan-10-ol **F50**

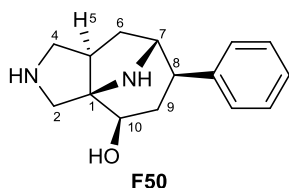

Deprotection of Boc-protected compound **S32** (40 mg, 0.12 mmol) was carried out by following general procedure I. Purification by SCX SPE eluting with MeOH then sat. NH<sub>3</sub>/MeOH gave the *title compound* **F50** (27 mg, 0.11 mmol, 96%) as a brown oil. **<sup>1</sup>H NMR** (500 MHz, MeOD-d<sub>4</sub>, 333 K, OH and 2 × NH not observed): δ 7.62 (2H, d, *J* 7.6, Ar-H), 7.29 (2H, t, 7.6, Ar-H), 7.16 (1H, t, *J* 7.6, Ar-H), 3.78 (1H, d, *J* 4.9, 10-H), 3.70 (1H, d, *J* 6.4, 7-H), 3.13 (1H, dd, *J* 11.5, 8.8, 4-H<sub>B</sub>), 2.93 (1H, d, *J* 12.2, 2-H<sub>A</sub>), 2.82 (1H, d, *J* 8.1, 8-H), 2.77 (1H, d, *J* 12.2, 2-H<sub>B</sub>), 2.75 (1H, dd, *J* 11.5, 5.9, 4-H<sub>A</sub>), 2.50-2.39 (1H, m, 5-H), 2.35 (1H, ddd, *J* 15.6, 8.3, 4.8, 9-H<sub>A</sub>), 2.17 (1H, dd, *J* 12.9, 9.0, 6-H<sub>A</sub>), 2.07 (1H, dd, *J* 15.6, 1.2, 9-H<sub>B</sub>), 1.94-1.85 (1H, m, 6-H<sub>B</sub>). **<sup>13</sup>C NMR** (125 MHz, MeOD-d<sub>4</sub>, 333 K): δ 146.8, 129.3, 129.3, 126.8, 77.4, 71.0, 65.1, 56.3, 55.7, 46.5, 44.7, 38.6, 32.3. **IR**  $\nu_{\text{max}}$ (film)/cm<sup>-1</sup> 3389, 1460, 1416. **HRMS** (ESI): C<sub>15</sub>H<sub>20</sub>N<sub>2</sub>O [M+H]<sup>+</sup>; calculated 245.1654, found 245.1650.

#### 5.4.3.22 Preparation of fragments derived from scaffold S33 and S34

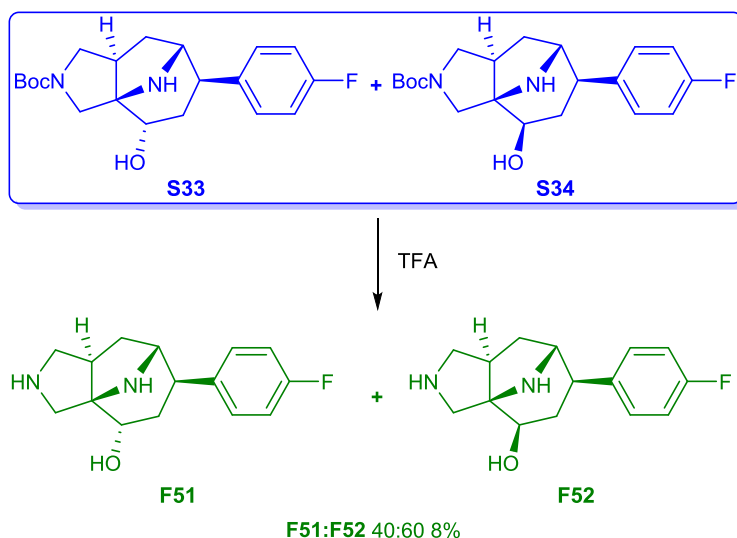



**(1*R*\*,5*R*\*,7*R*\*,8*R*\*,10*S*\*)-8-(4-Fluorophenyl)-3,11-diazatricyclo[5.3.1.0<sup>1,5</sup>]undecan-10-ol F51**  
**and (1*R*\*,5*R*\*,7*R*\*,8*R*\*,10*R*\*)-8-(4-fluorophenyl)-3,11-diazatricyclo[5.3.1.0<sup>1,5</sup>]undecan-10-ol**  
**F52**

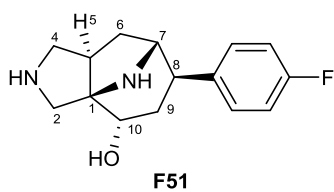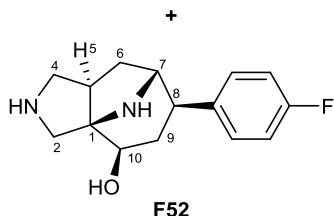

Deprotection of Boc-protected compounds **S33** and **S34** (119 mg, 0.46 mmol) was carried out by following general procedure I. Purification by SCX eluting with MeOH then sat. NH<sub>3</sub>/MeOH gave the *title compounds* **F51** and **F52** (10 mg, 38 μmol, 8%, 40:60 mixture of diastereomers) as a brown oil. <sup>1</sup>H NMR (400 MHz, MeOD-d<sub>4</sub>, major and minor assigned by analogy to compounds **F51** and **F52**): δ 7.61-7.55 (1.2H, m, major Ar 3-H), 7.31-7.23 (0.8H, m, minor Ar 3-H), 7.02-6.90 (2H, m, major and minor, Ar 2-H), 4.01 (0.4H, dd, *J* 10.8, 5.8, minor, 10-H), 3.86 (0.6H, d, *J* 3.7,

major, 10-H), 3.73 (0.6H, d, *J* 6.9, major, 7-H), 3.65 (0.4H, d, *J* 6.7, minor 7-H), 3.52 (0.6H, dd, *J* 11.9, 9.5, major 4-H<sub>B</sub>), 3.45 (0.4H, dd, *J* 11.8, 9.5, minor, 4-H<sub>B</sub>), 3.41 (0.4H, d, *J* 11.9, minor 2-H<sub>A</sub>), 3.29 (0.6H, d, *J* 12.4, major, 2-H<sub>A</sub>), 3.13 (0.6H, dd, *J* 11.9, 6.6, major, 4-H<sub>A</sub>), 3.10 (0.6H, d, *J* 12.4, major, 2-H<sub>B</sub>), 3.08 (0.4H, d, *J* 11.9, minor, 2-H<sub>B</sub>), 3.05 (0.4H, dd, *J* 11.8, 7.2, minor, 4-H<sub>A</sub>), 2.98 (0.4H, d, *J* 7.0, minor, 8-H), 2.94-2.82 (0.4H, m, minor, 5-H), 2.86 (0.6H, d, *J* 8.0, major, 8-H), 2.79-2.65 (0.6H, m, major, 5-H), 2.29 (0.6H, ddd, *J* 13.4, 8.3, 4.7, major, 9-H<sub>B</sub>), 2.27-2.21 (0.4H, m, minor, 9-H<sub>B</sub>), 2.20 (0.6H, dd, *J* 13.6, 9.1, major, 6-H<sub>B</sub>), 2.10 (0.4H, dd, *J* 13.4, 8.9, minor, 6-H<sub>B</sub>), 2.04-1.97 (0.6H, m, major, 6-H<sub>A</sub>), 2.03 (0.6H, ddd, *J* 13.4, 6.9, 4.7, major, 9-H<sub>A</sub>), 1.96 (0.4H, ddd, *J* 13.3, 6.8, 4.4, minor, 6-H<sub>A</sub>), 1.78 (0.4H, ddd, *J* 14.5, 10.9, 7.2, minor, 9-H<sub>A</sub>). <sup>13</sup>C NMR (100 MHz, MeOD-d<sub>4</sub>): δ 161.5 (d, *J* 243), 161.4 (d, *J* 244), 139.7, 138.8, 130.0 (d, *J* 7.9), 129.3 (d, *J* 7.7), 114.8 (d, *J* 21), 114.4 (d, *J* 21), 74.8, 74.6, 72.2, 67.5, 65.2, 63.6, 62.9, 52.4, 52.3, 49.4, 45.2, 42.1, 41.7, 38.3, 36.4, 35.7, 31.5, 29.2 [26 of 26 expected peaks observed]. IR ν<sub>max</sub>(film)/cm<sup>-1</sup> 3389, 1482, 1447. HRMS (ESI): C<sub>15</sub>H<sub>19</sub>FN<sub>2</sub>NaO [M+Na]<sup>+</sup>; calculated 285.1374, found 285.1370.

## 6.0 High-throughput protein crystallography

Proteins were expressed, purified, and crystallised as previously described for JMJD2D,<sup>S11</sup> and the ATAD2 and BRD1 bromodomains.<sup>S12</sup> Crystal soaking was performed using the XChem platform.<sup>S13</sup> X-ray diffraction data were collected at Diamond Light Source beamline I04-1 and processed through the Diamond autoprocessing pipeline. Electron density maps were generated in batch by *DIMPLE*<sup>S14</sup> using *XChemExplorer*.<sup>S15</sup> Ligand restraints were generated with *ACEDRG* or *Grade*<sup>S16</sup> and ligand binding was detected with *PanDDA*,<sup>S17</sup> with ligands built into *PanDDA* event maps. Fragments based on natural product paralogues were screened as racemates. Both enantiomers were fitted to the electron density in the *PanDDA* event maps using *COOT*<sup>S18</sup>, then the enantiomer with the best fit was chosen. Iterative refinement and manual model correction was performed using *REFMAC*<sup>S19</sup> and *COOT*, respectively.

## 7.0 Processed NMR spectra

Compounds are listed in order of appearance within in the Supplementary Information. NOESY spectra are also included in this Section.

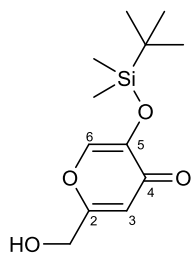

S1

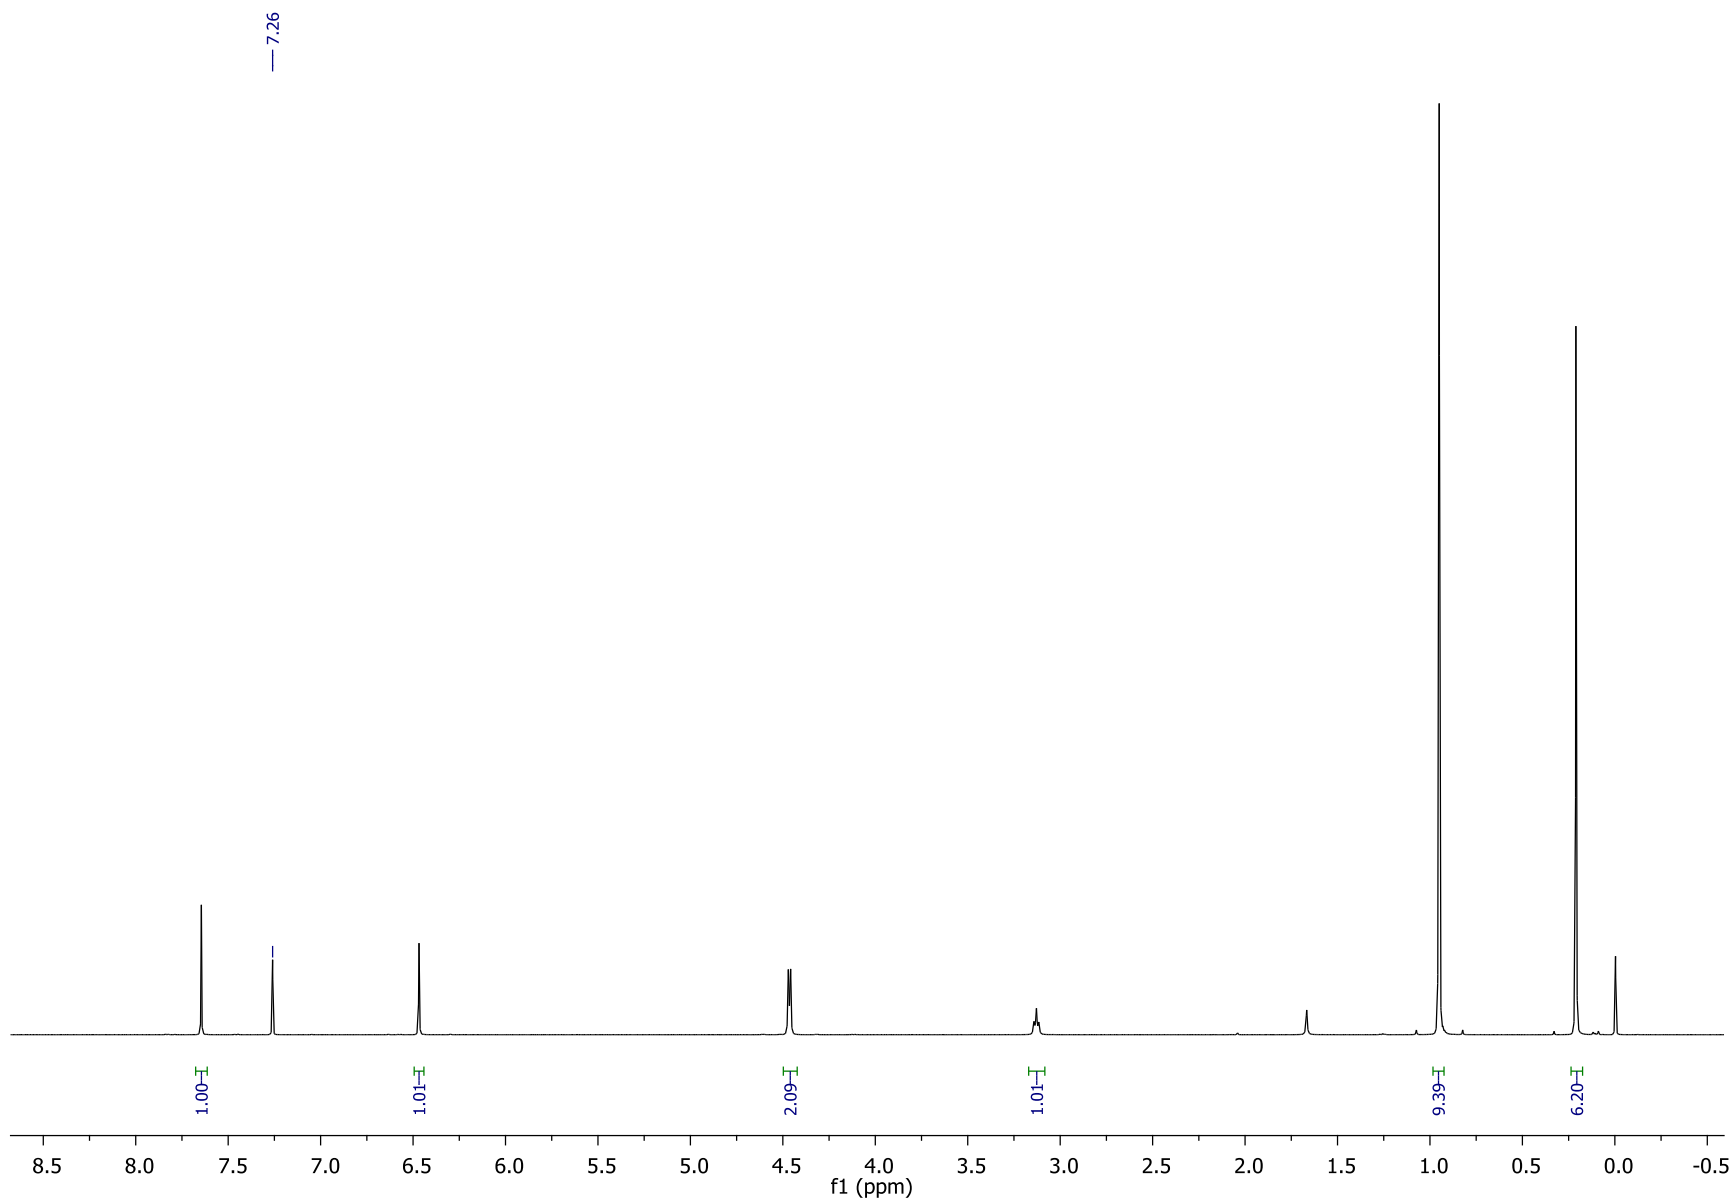

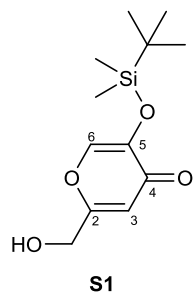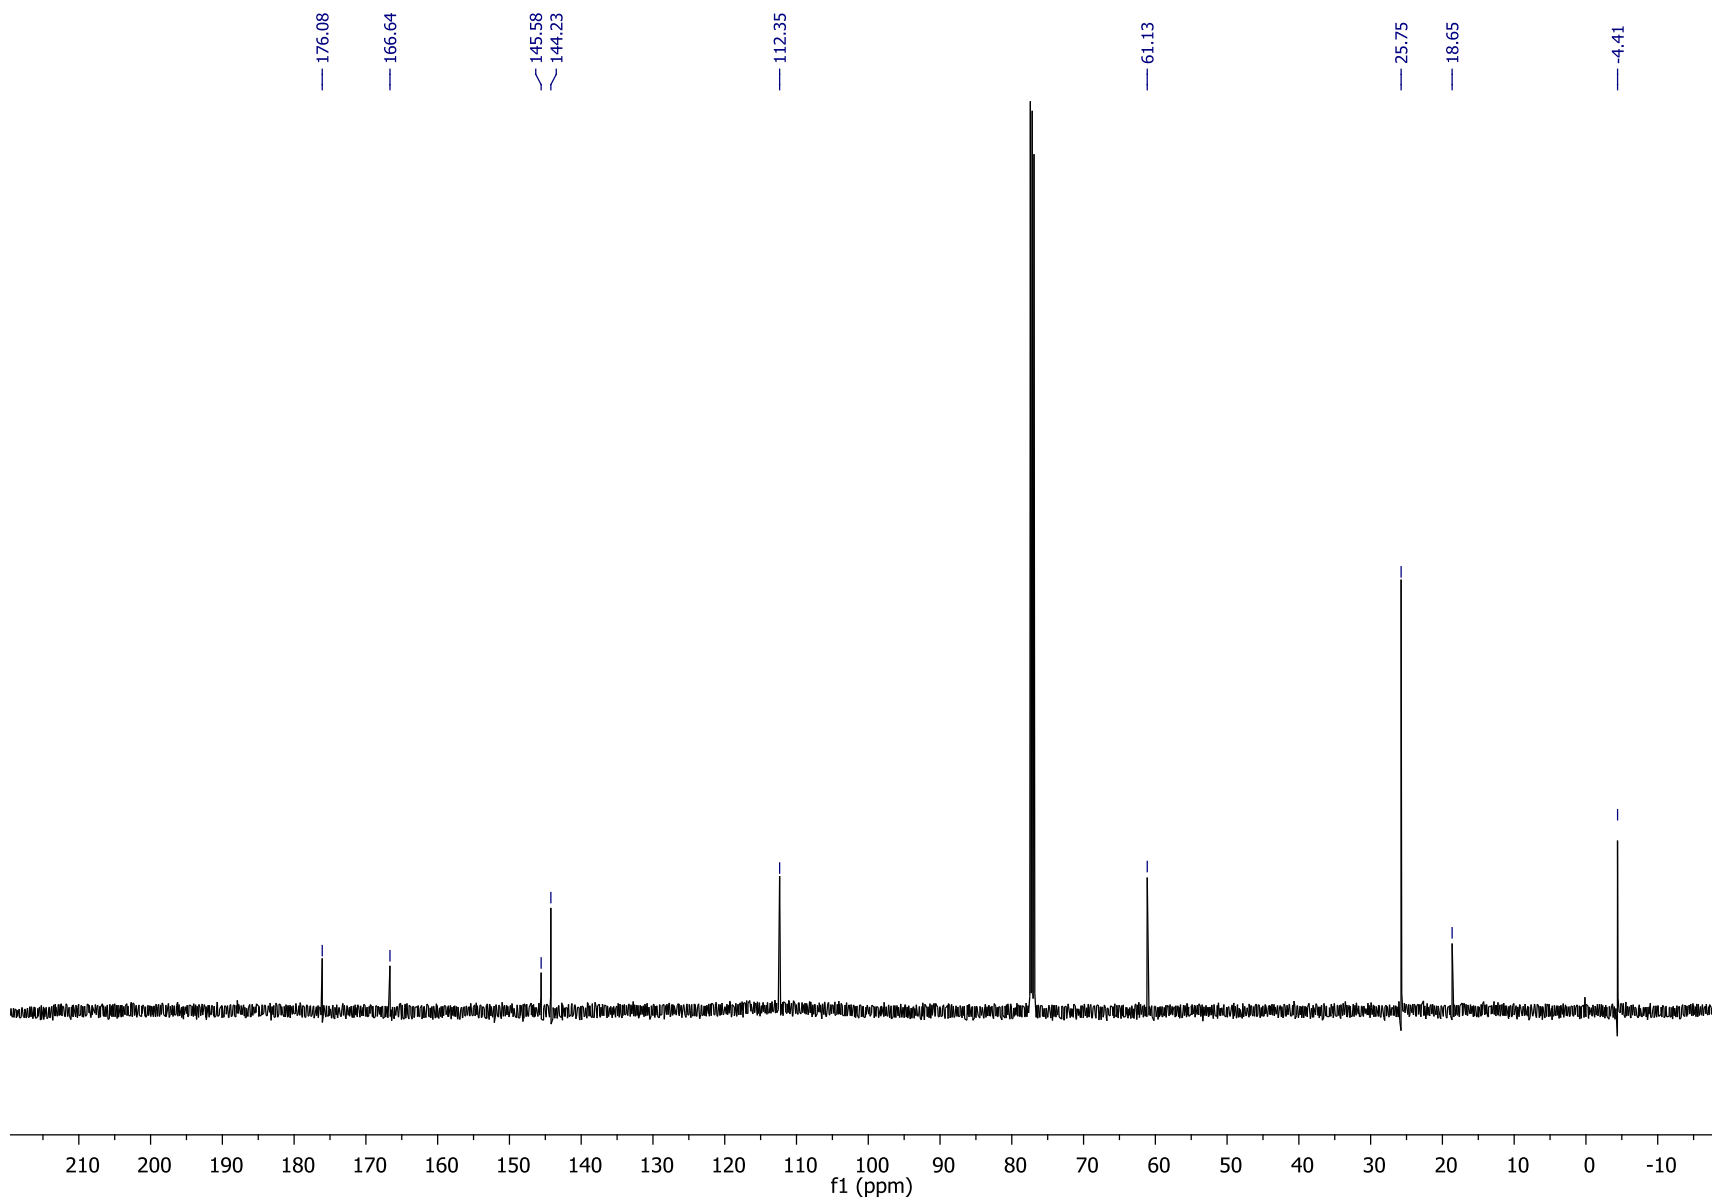

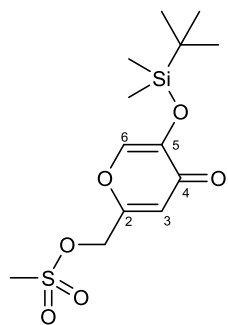

**S2**

*carried forward crude*

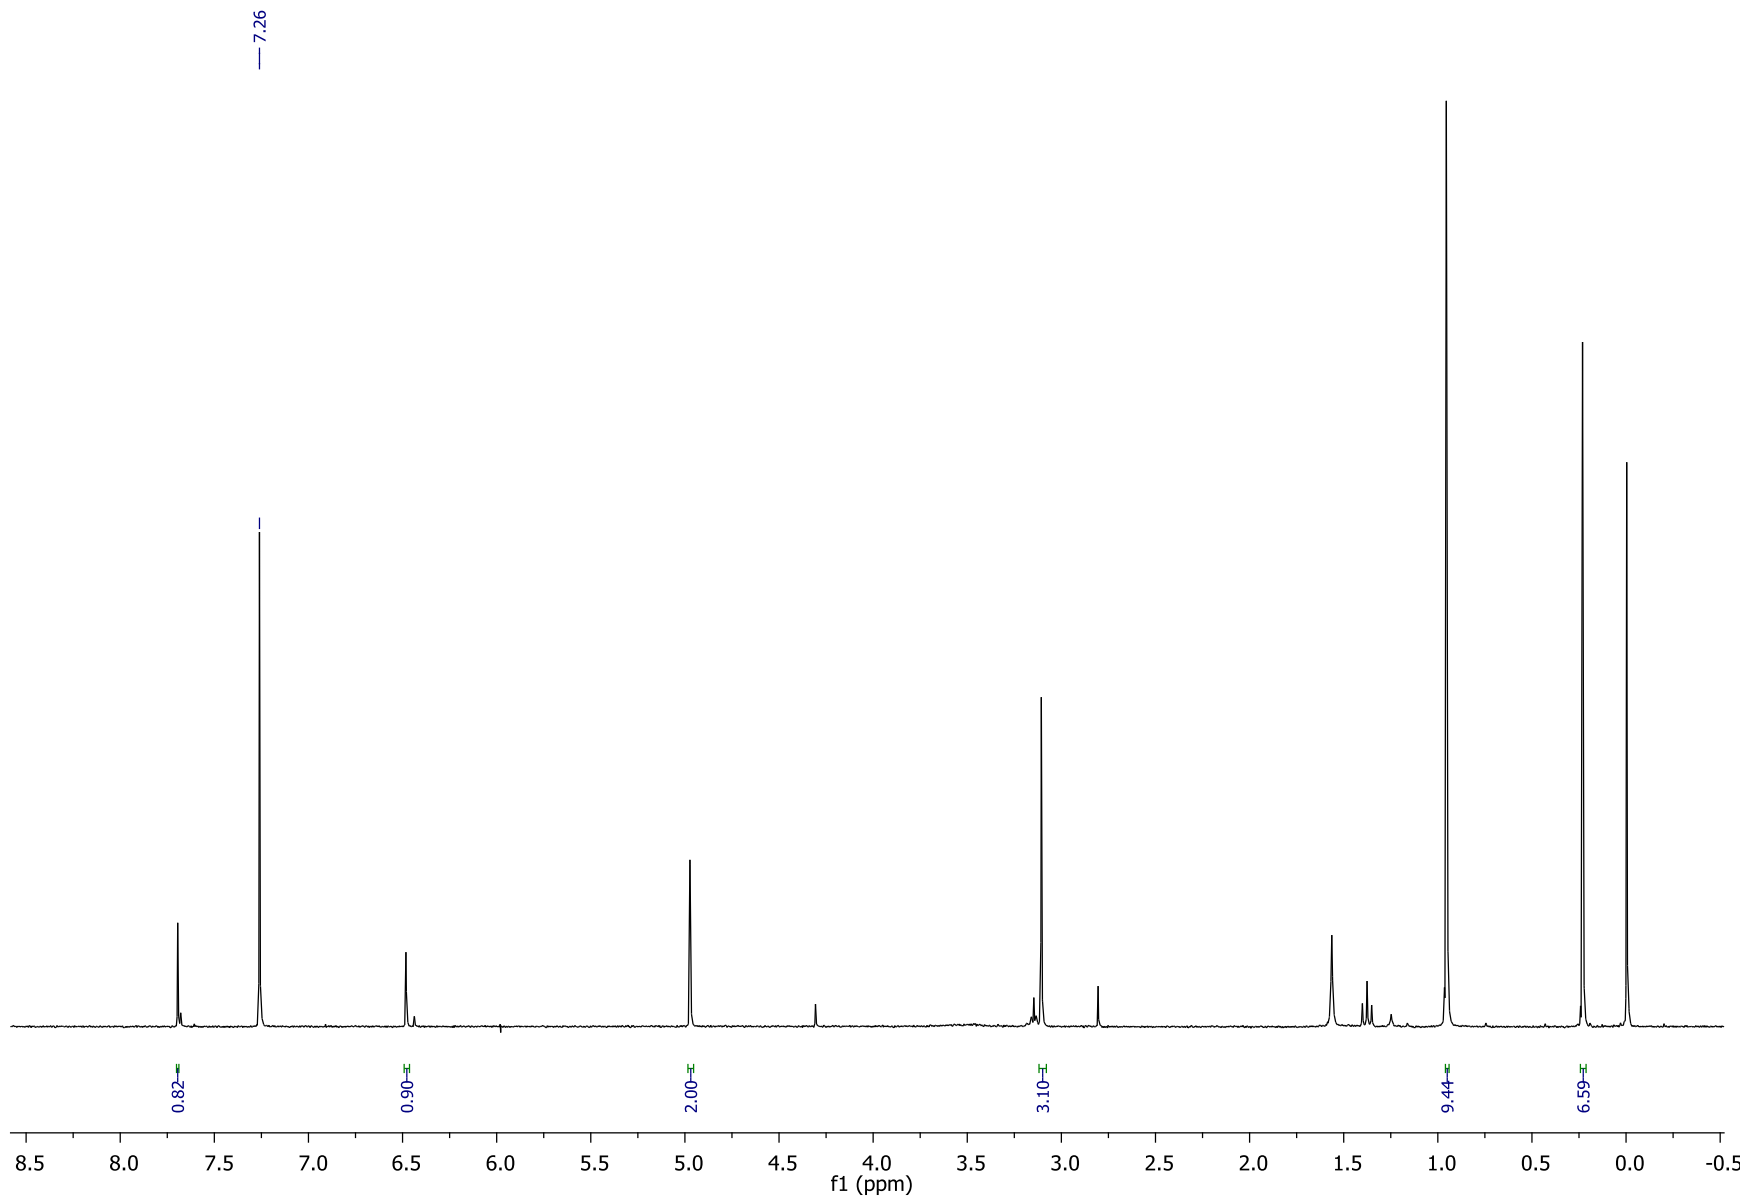

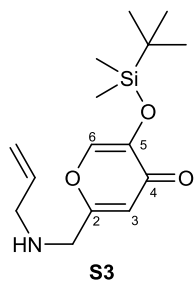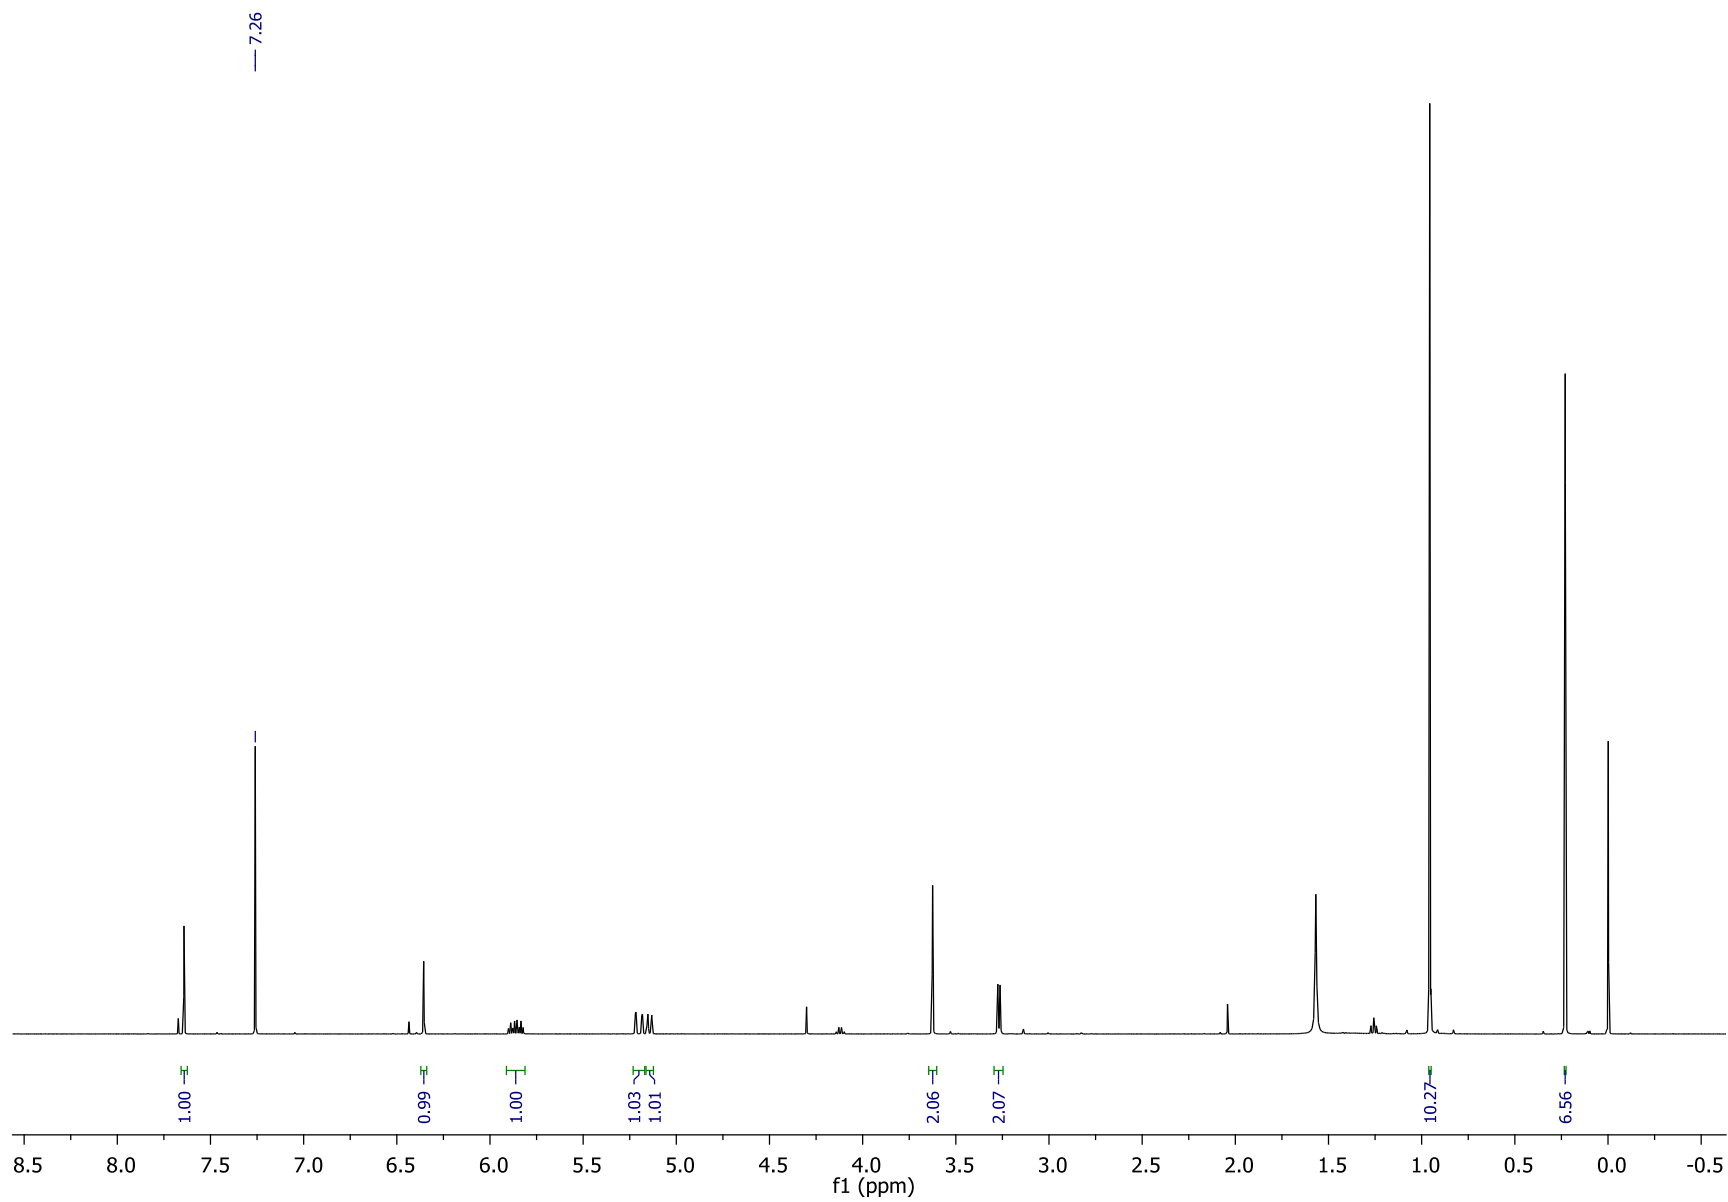

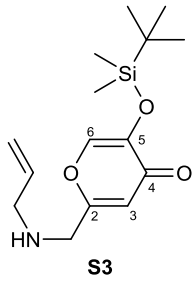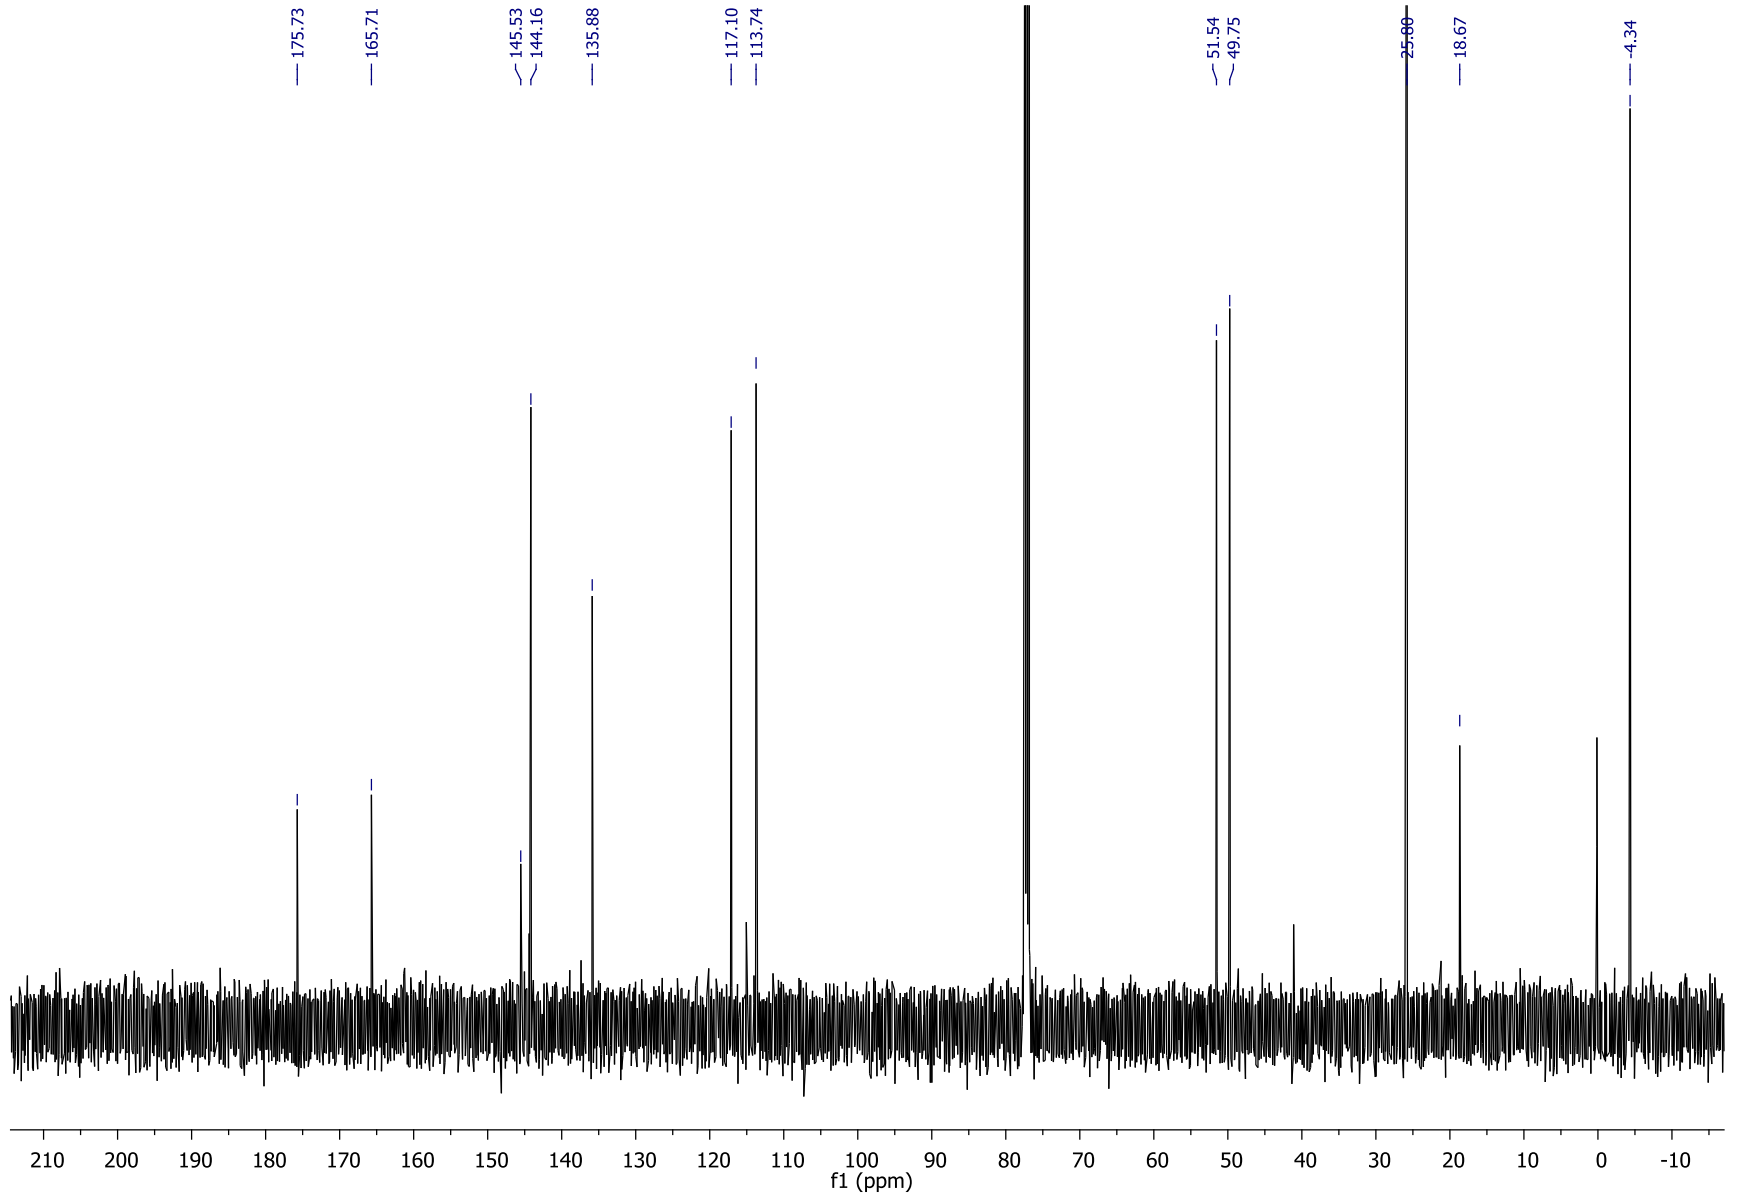



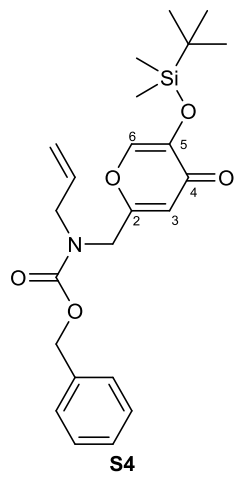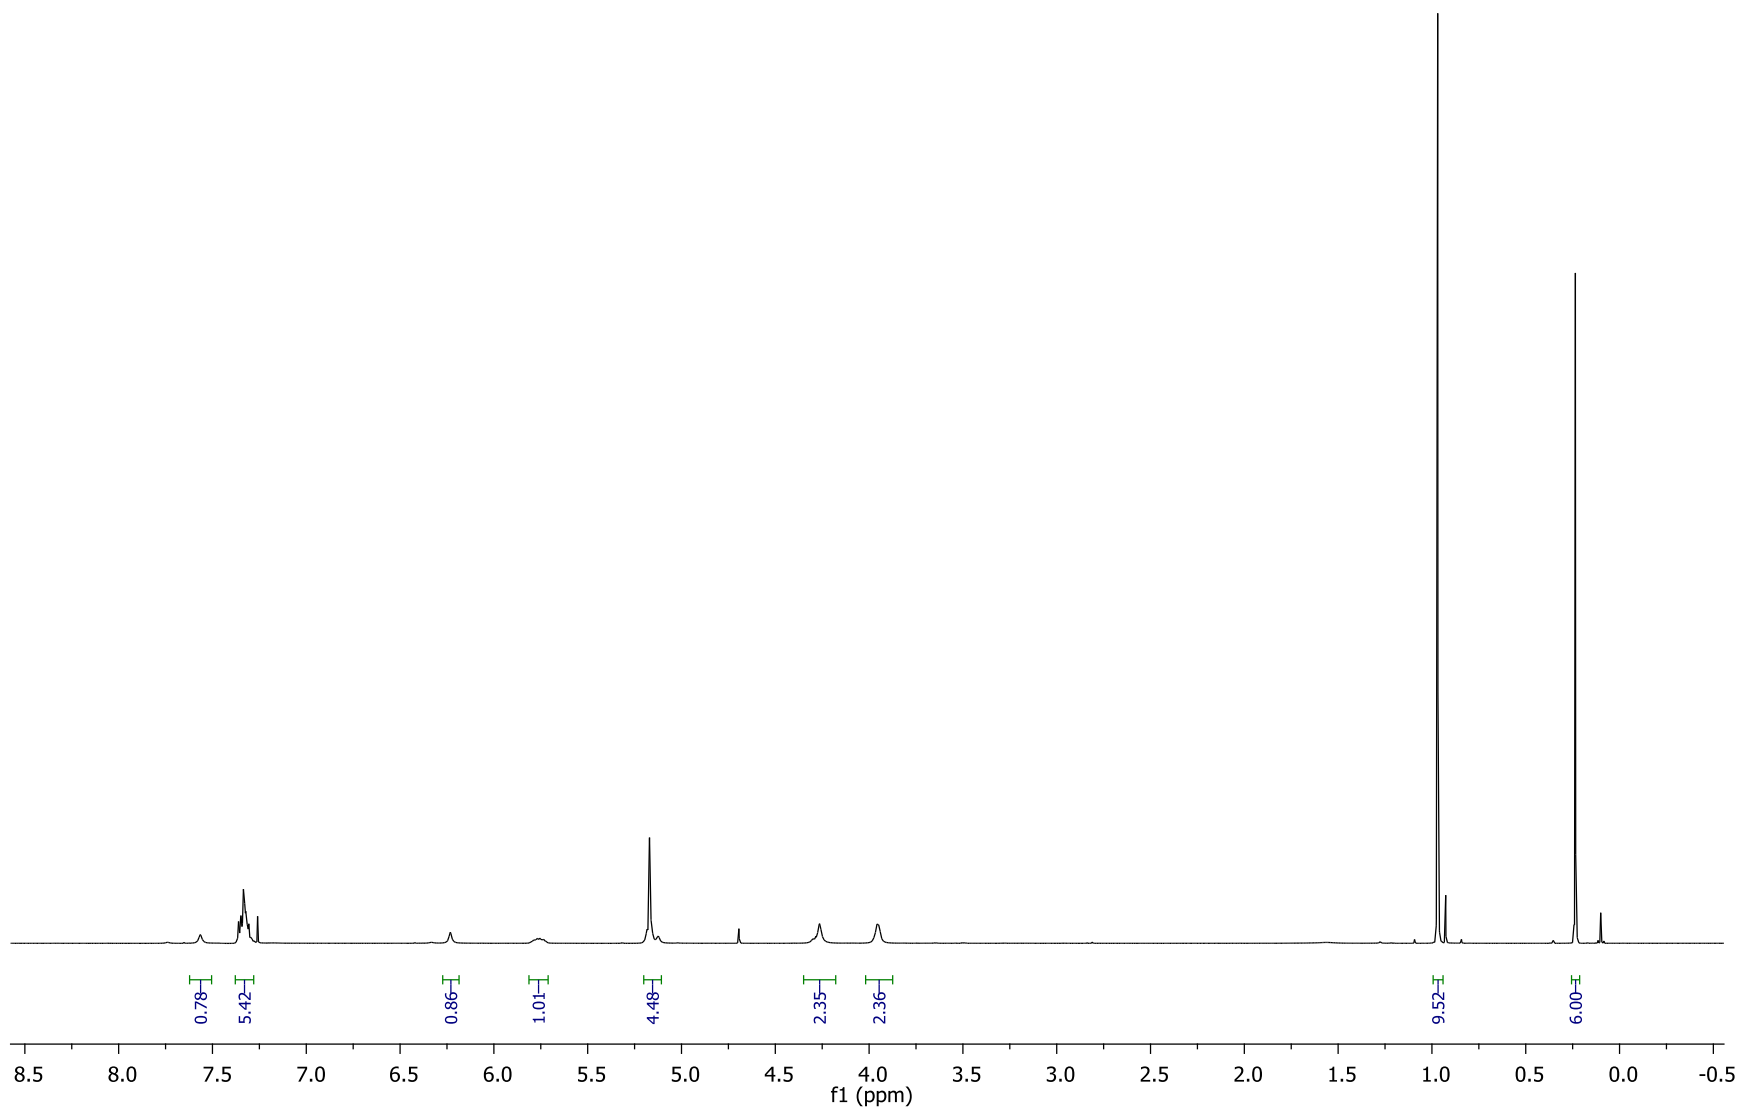

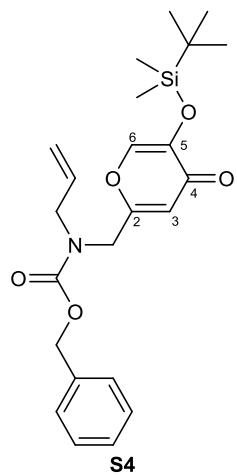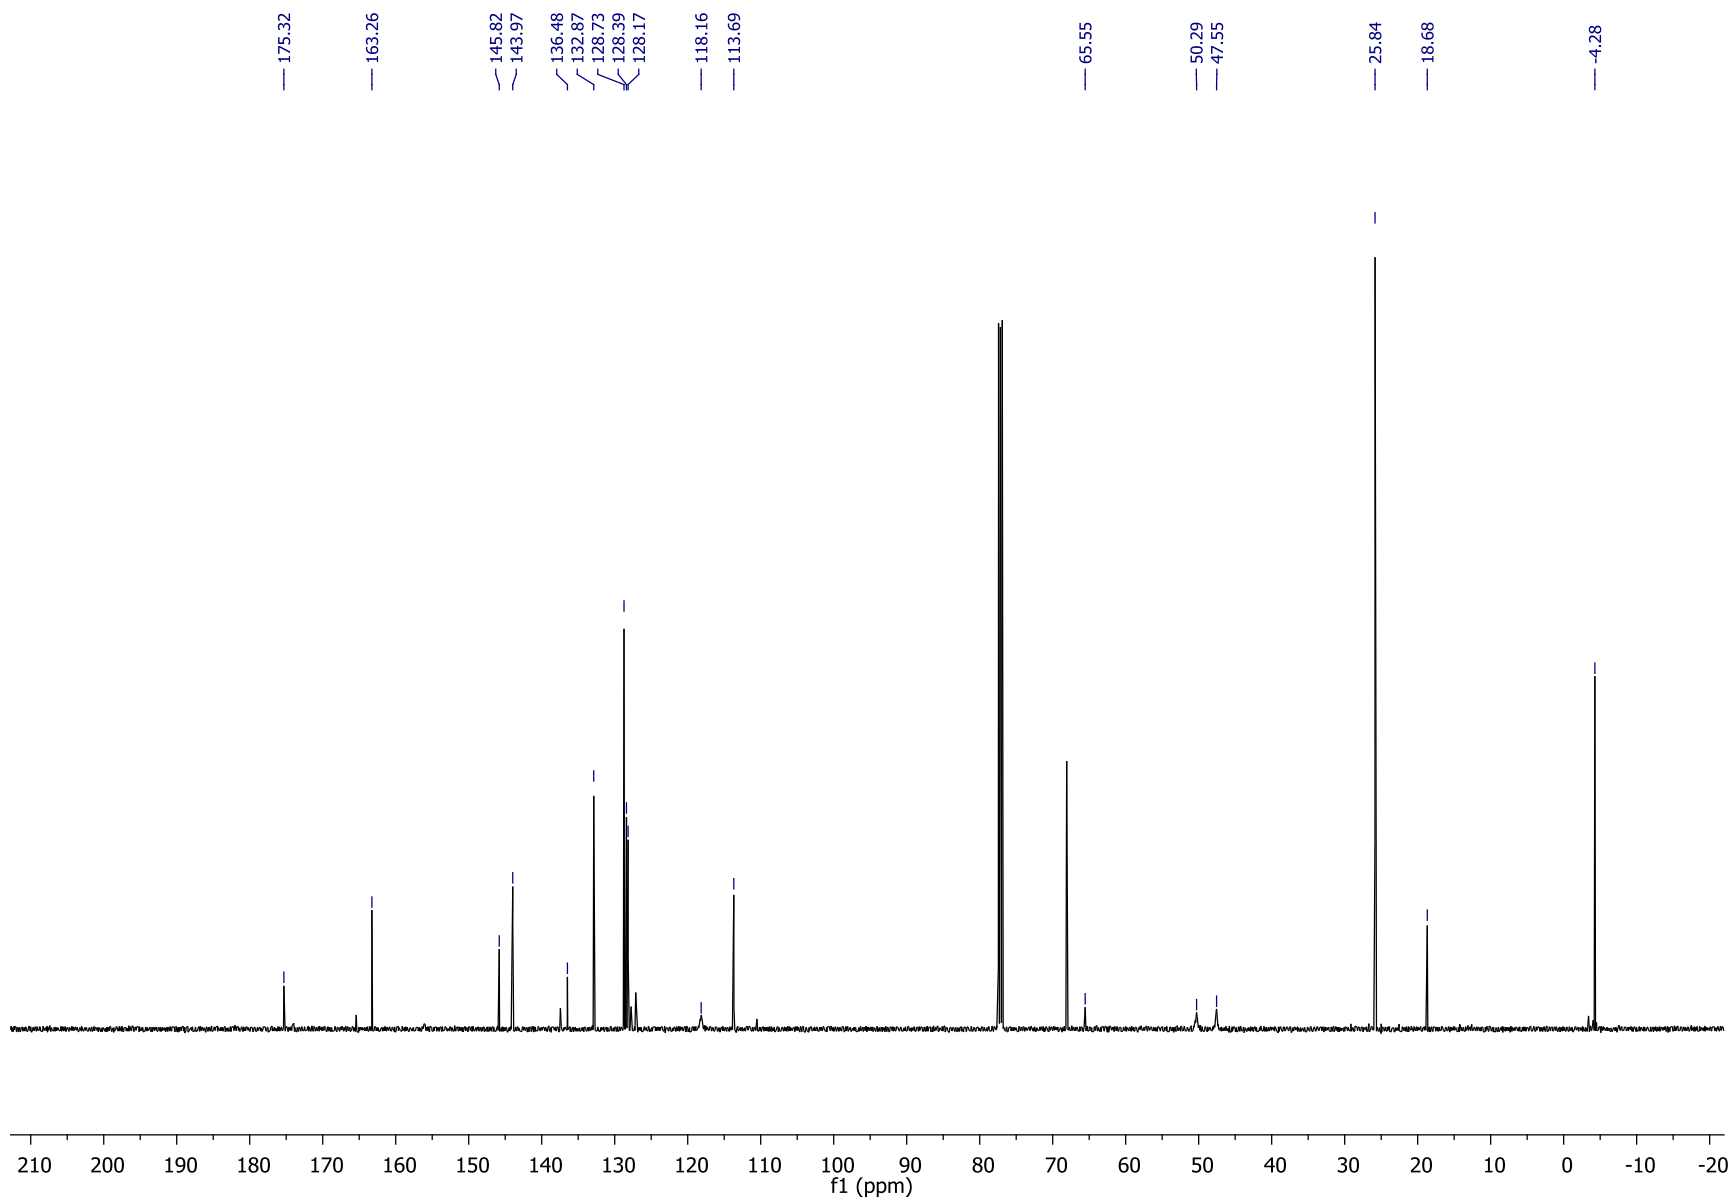

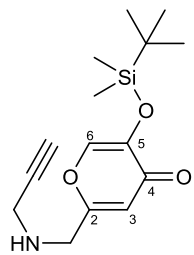

**S5**

*carried forward crude*

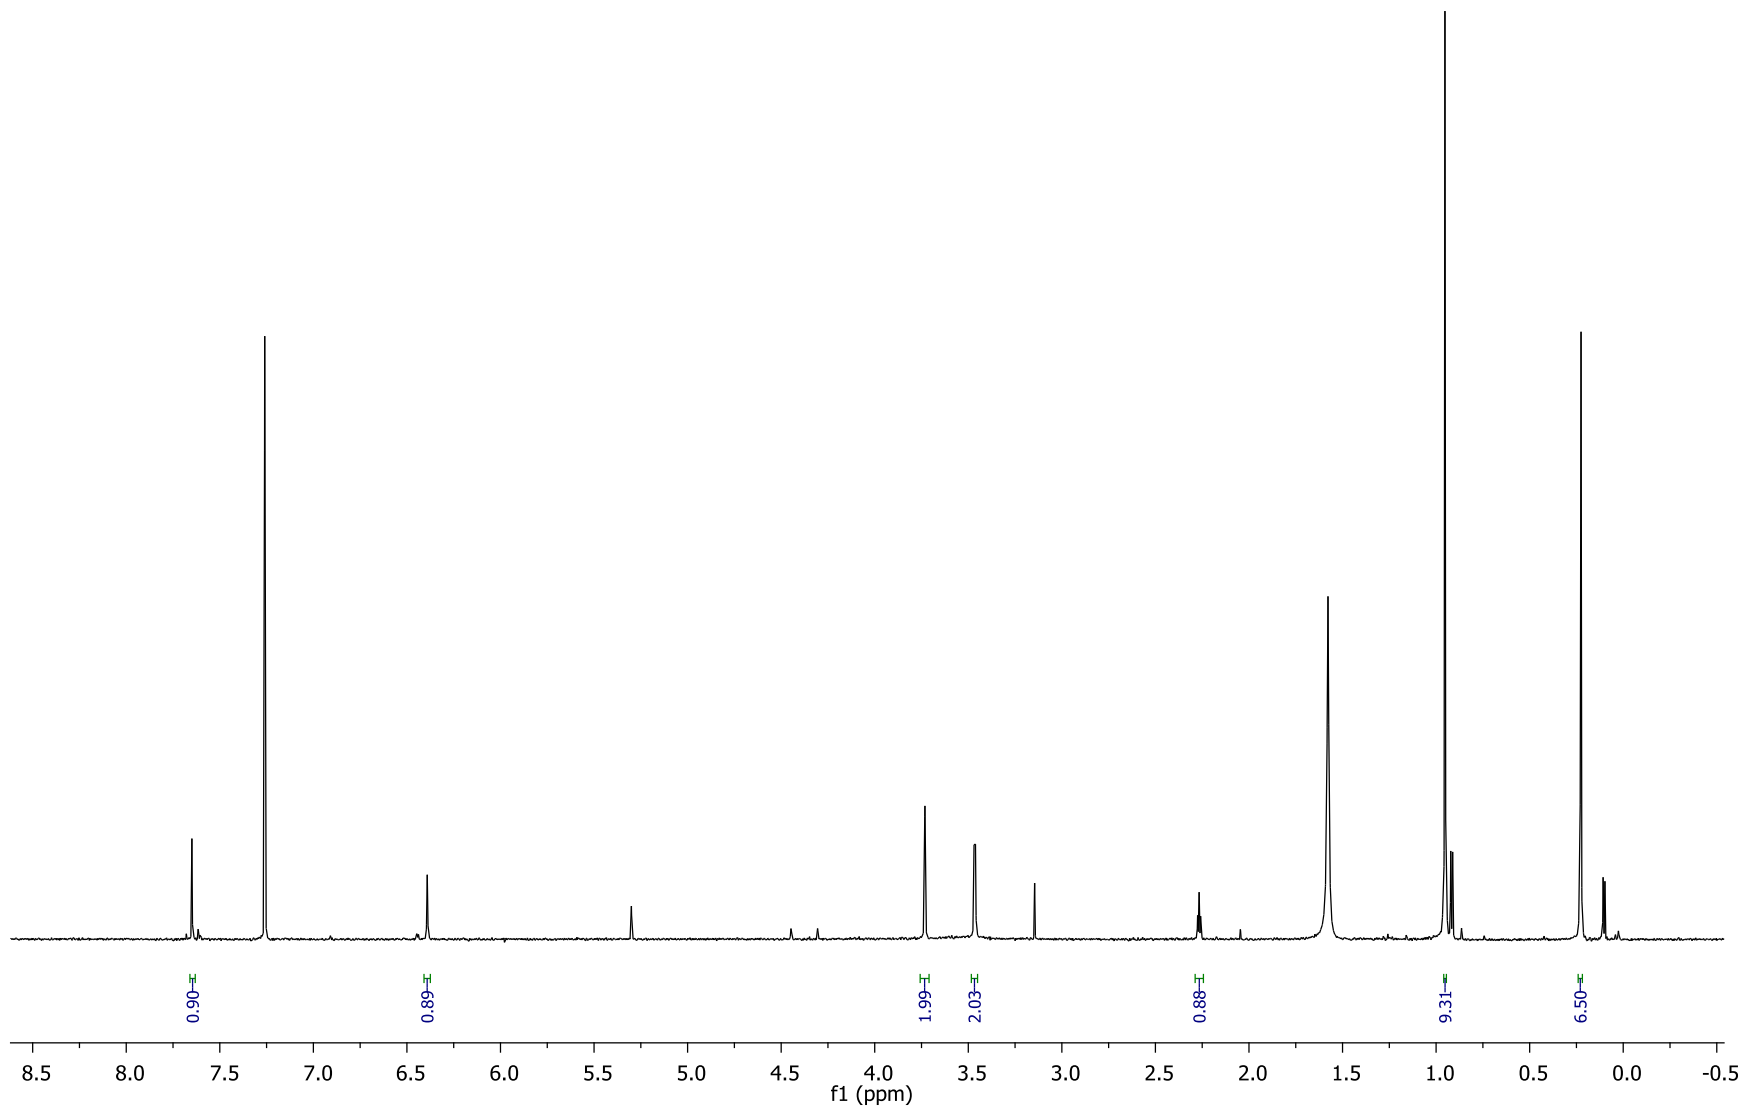

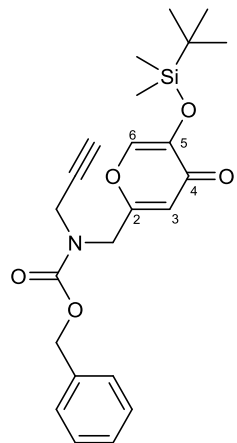

S6

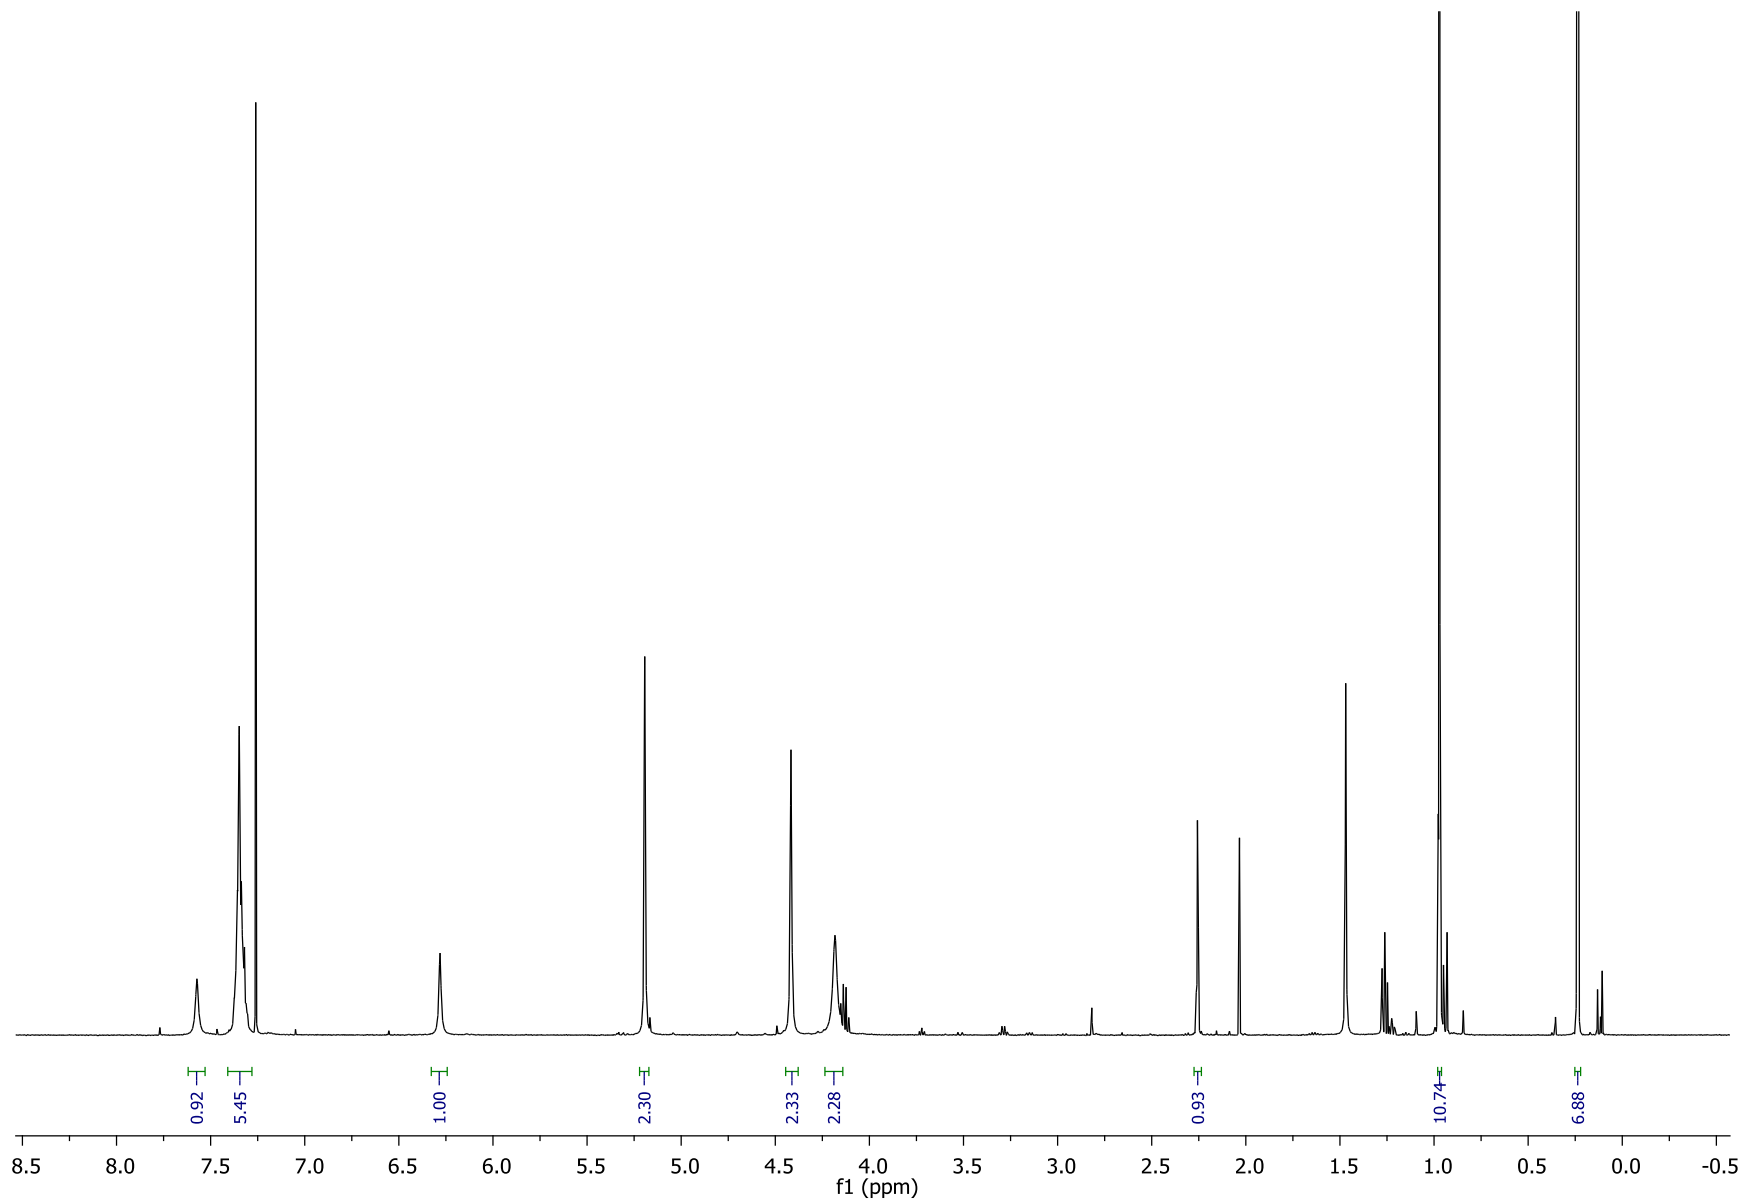

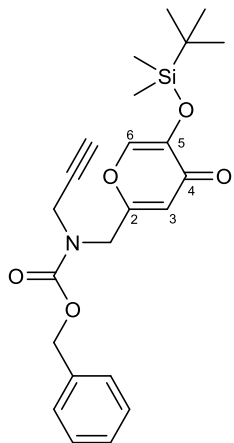

S6

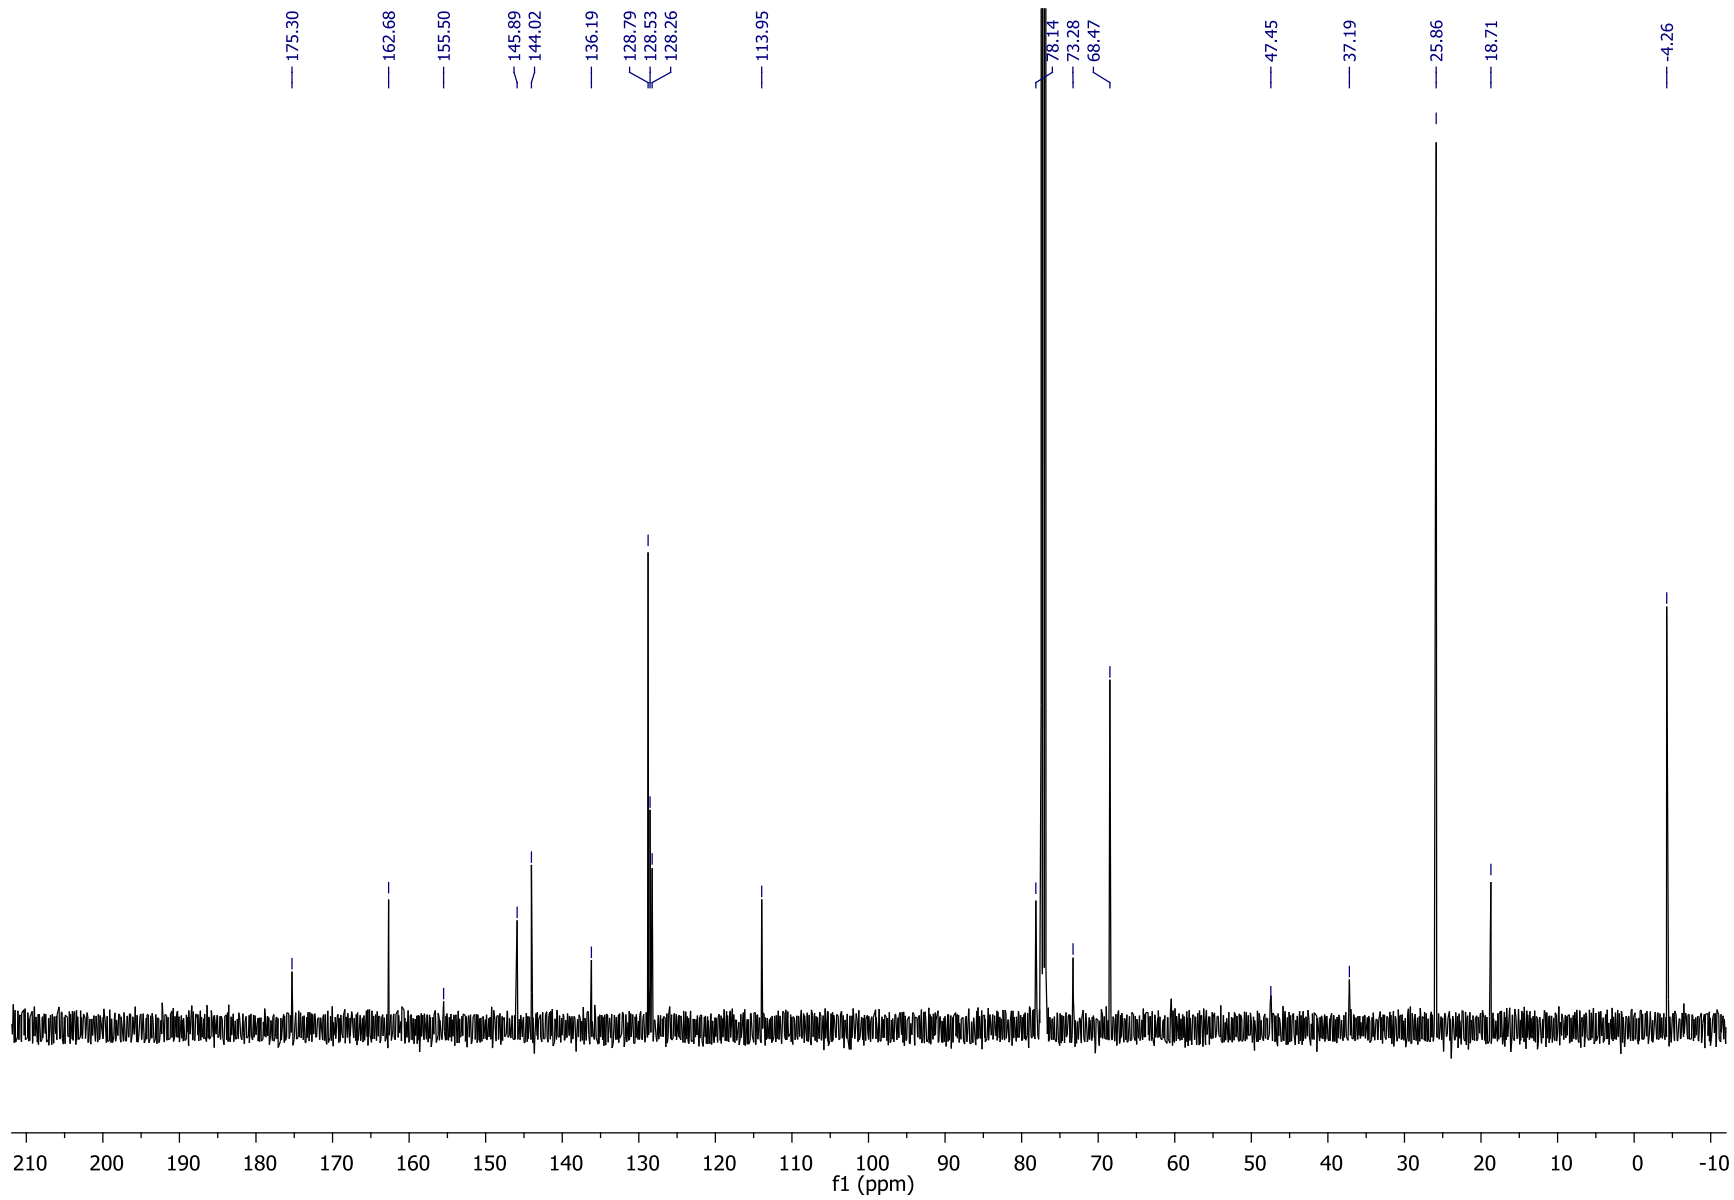

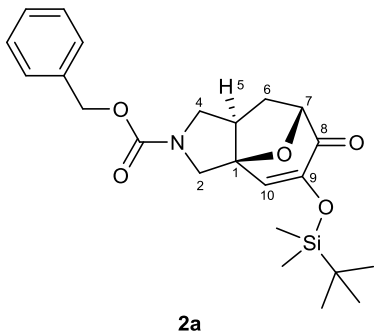

2a

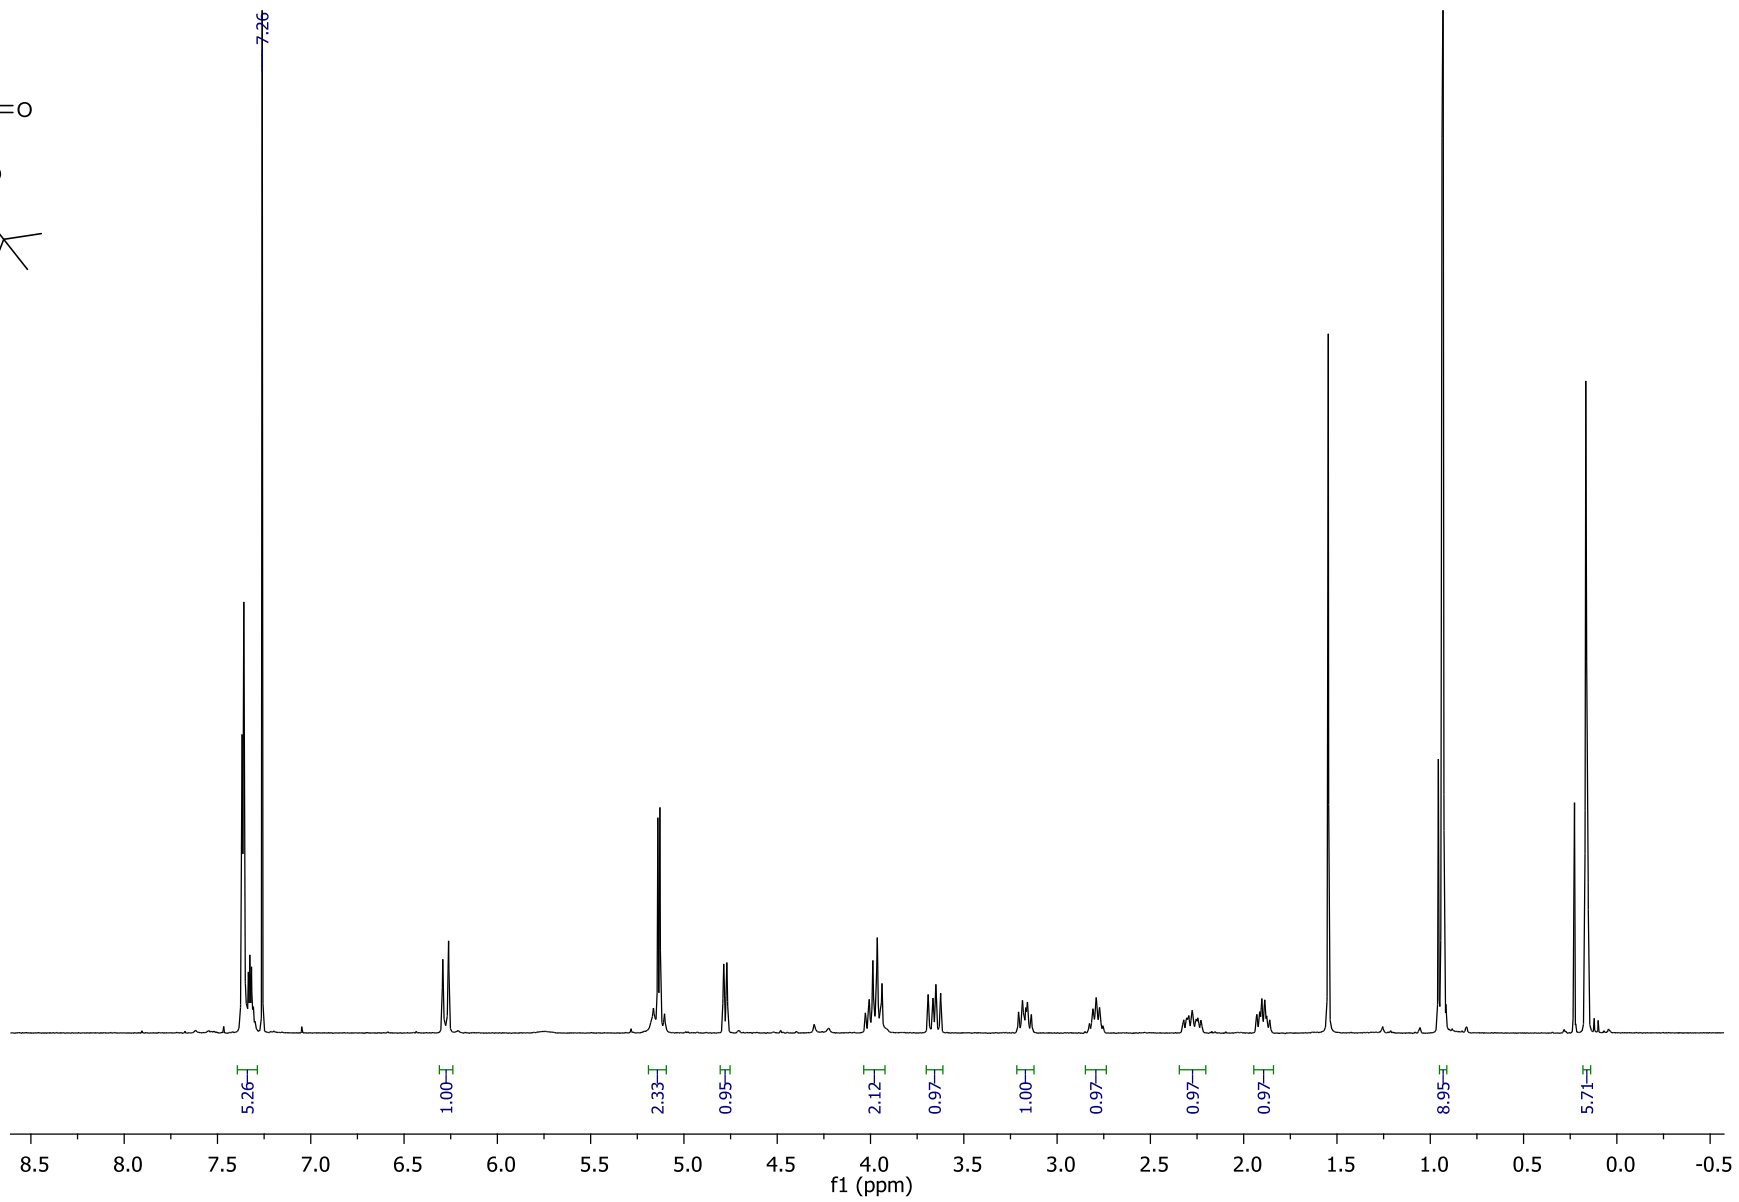

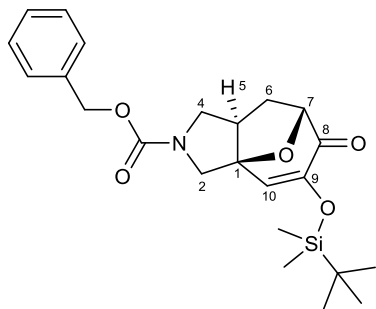

2a

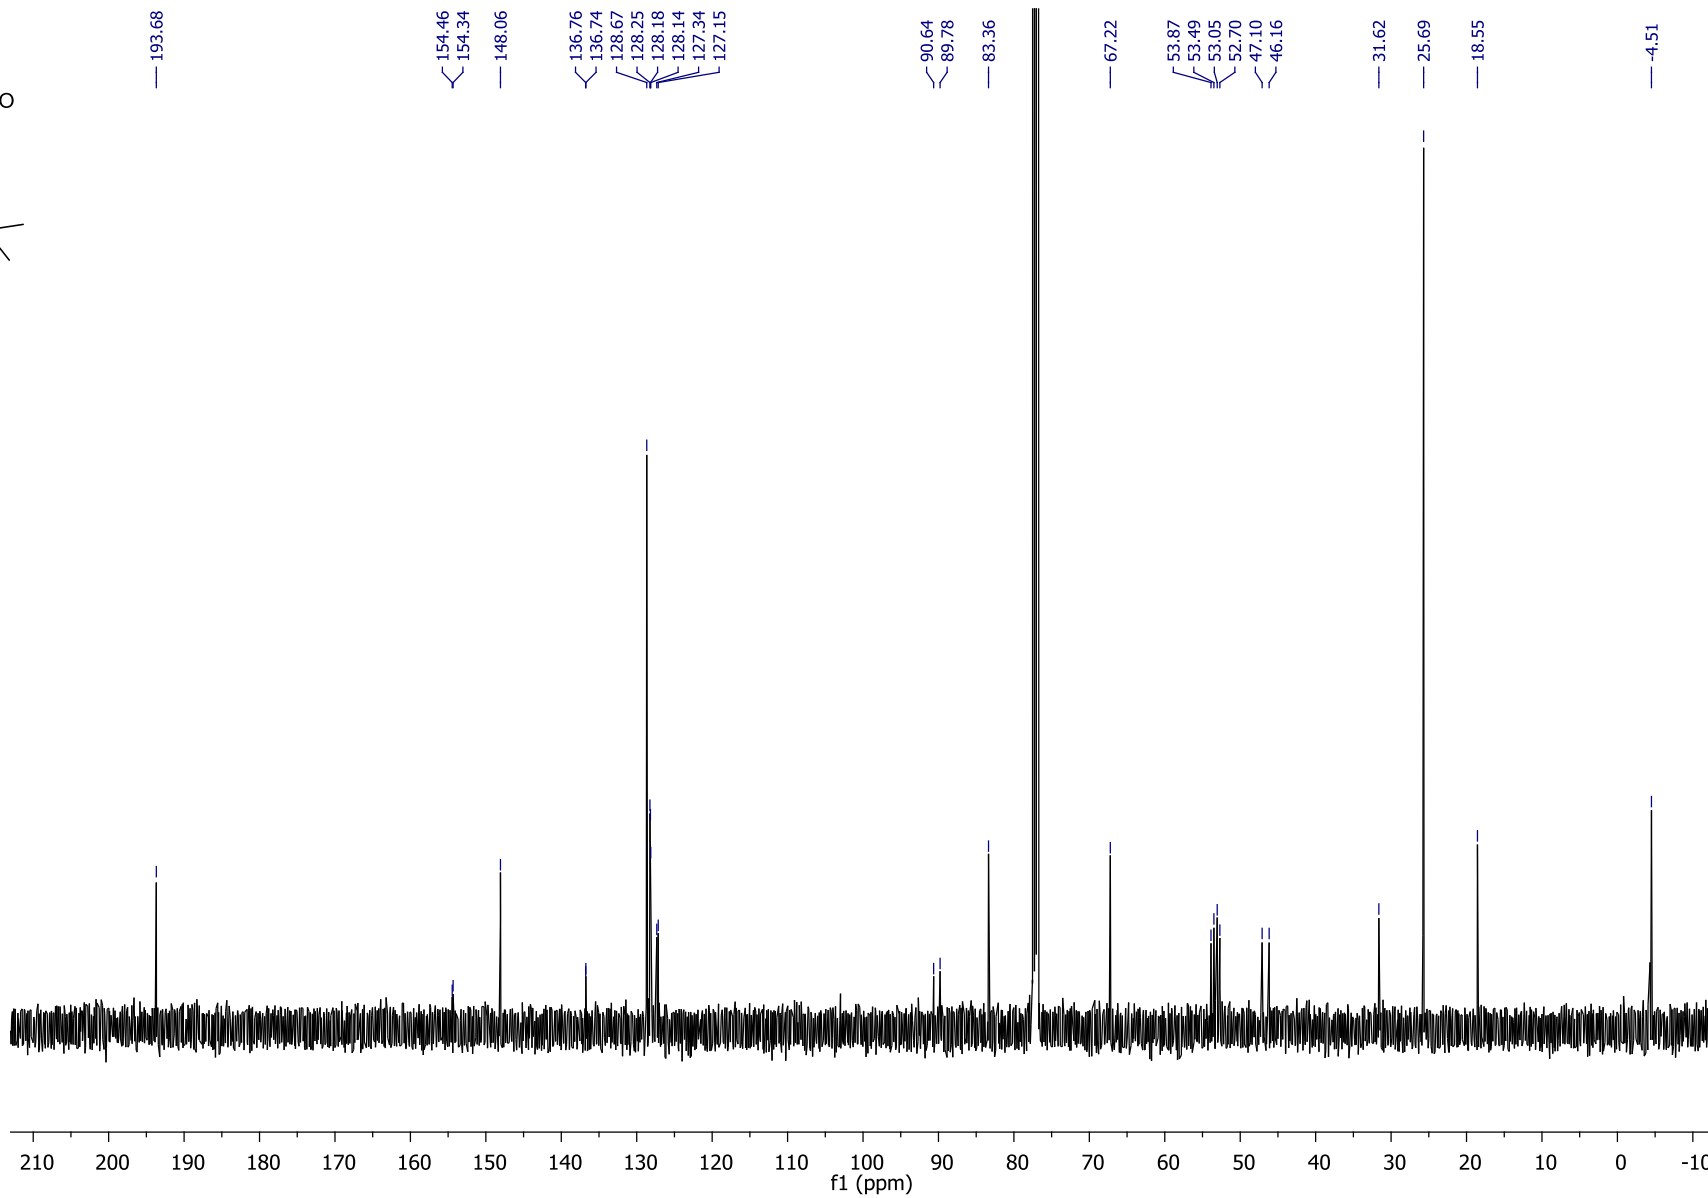

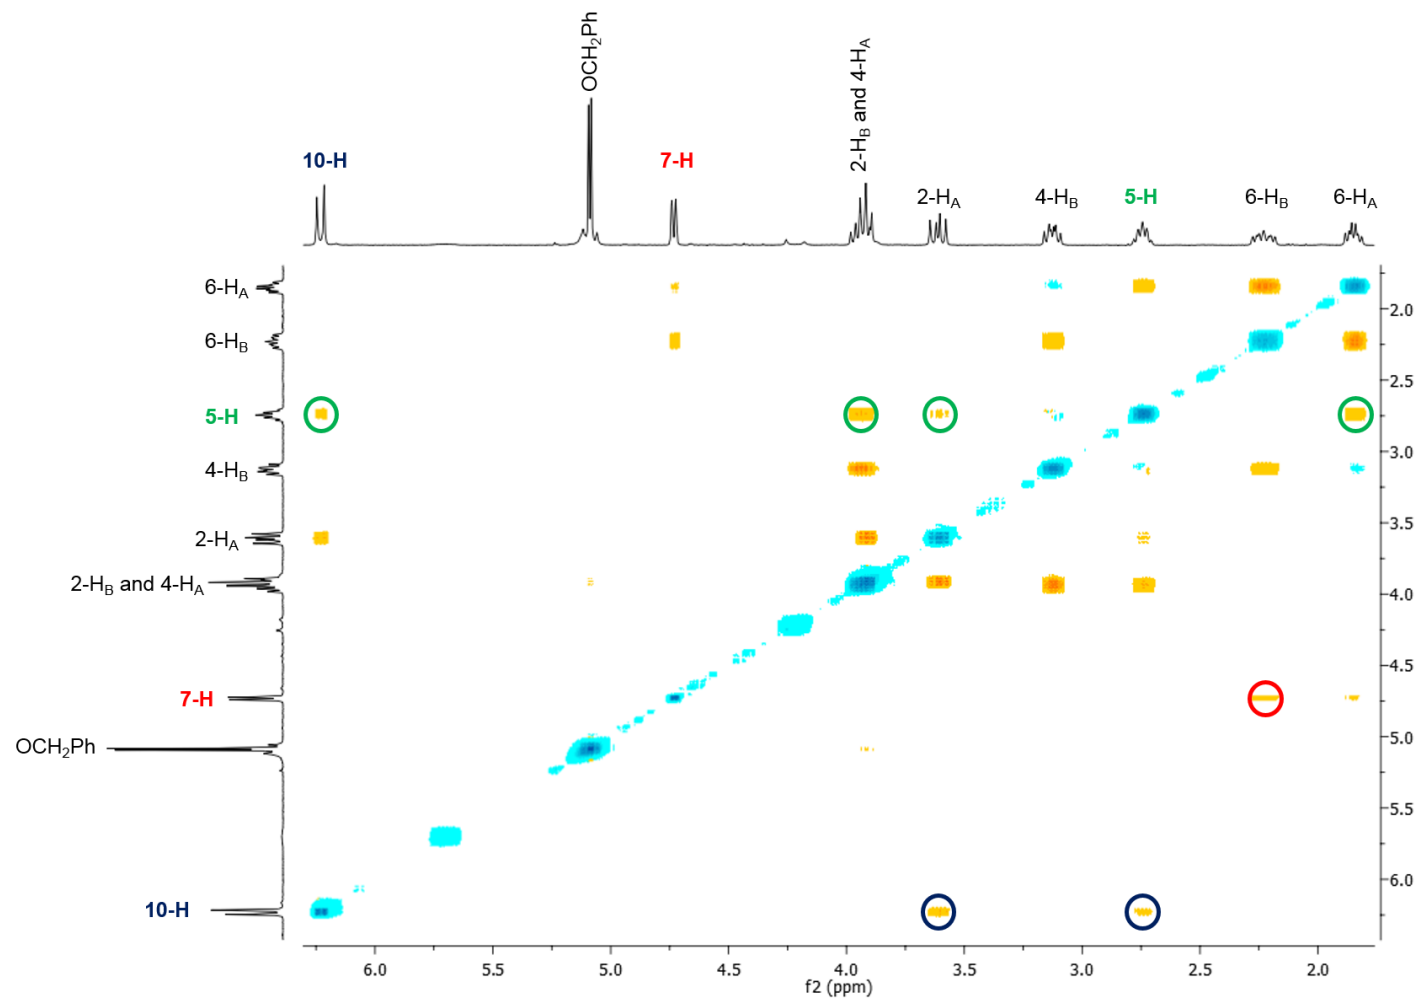

**2a NOESY correlations:**

**5-H:** 2-H<sub>A</sub>; 4-H<sub>A</sub>; 6-H<sub>A</sub>; 10-H

**7-H:** 6-H<sub>B</sub>

**10-H:** 2-H<sub>A</sub>; 5-H

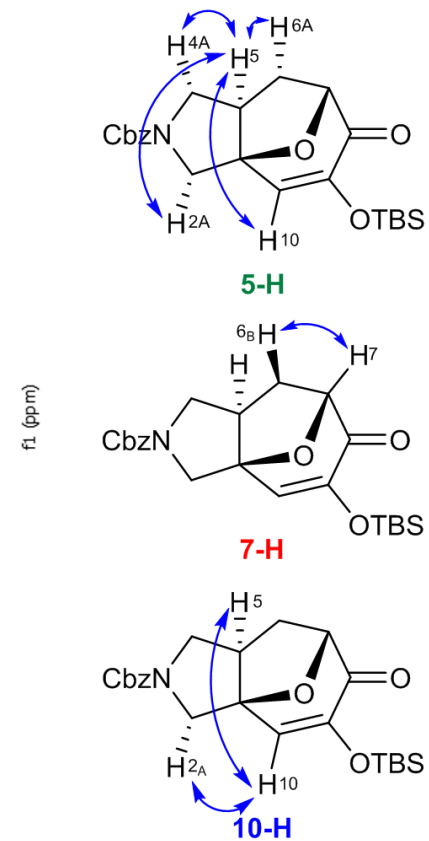



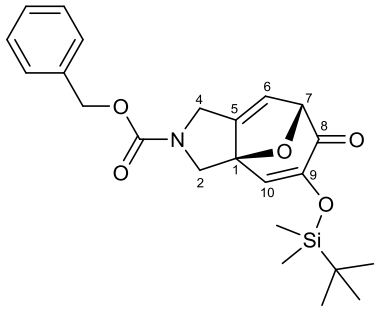

2b

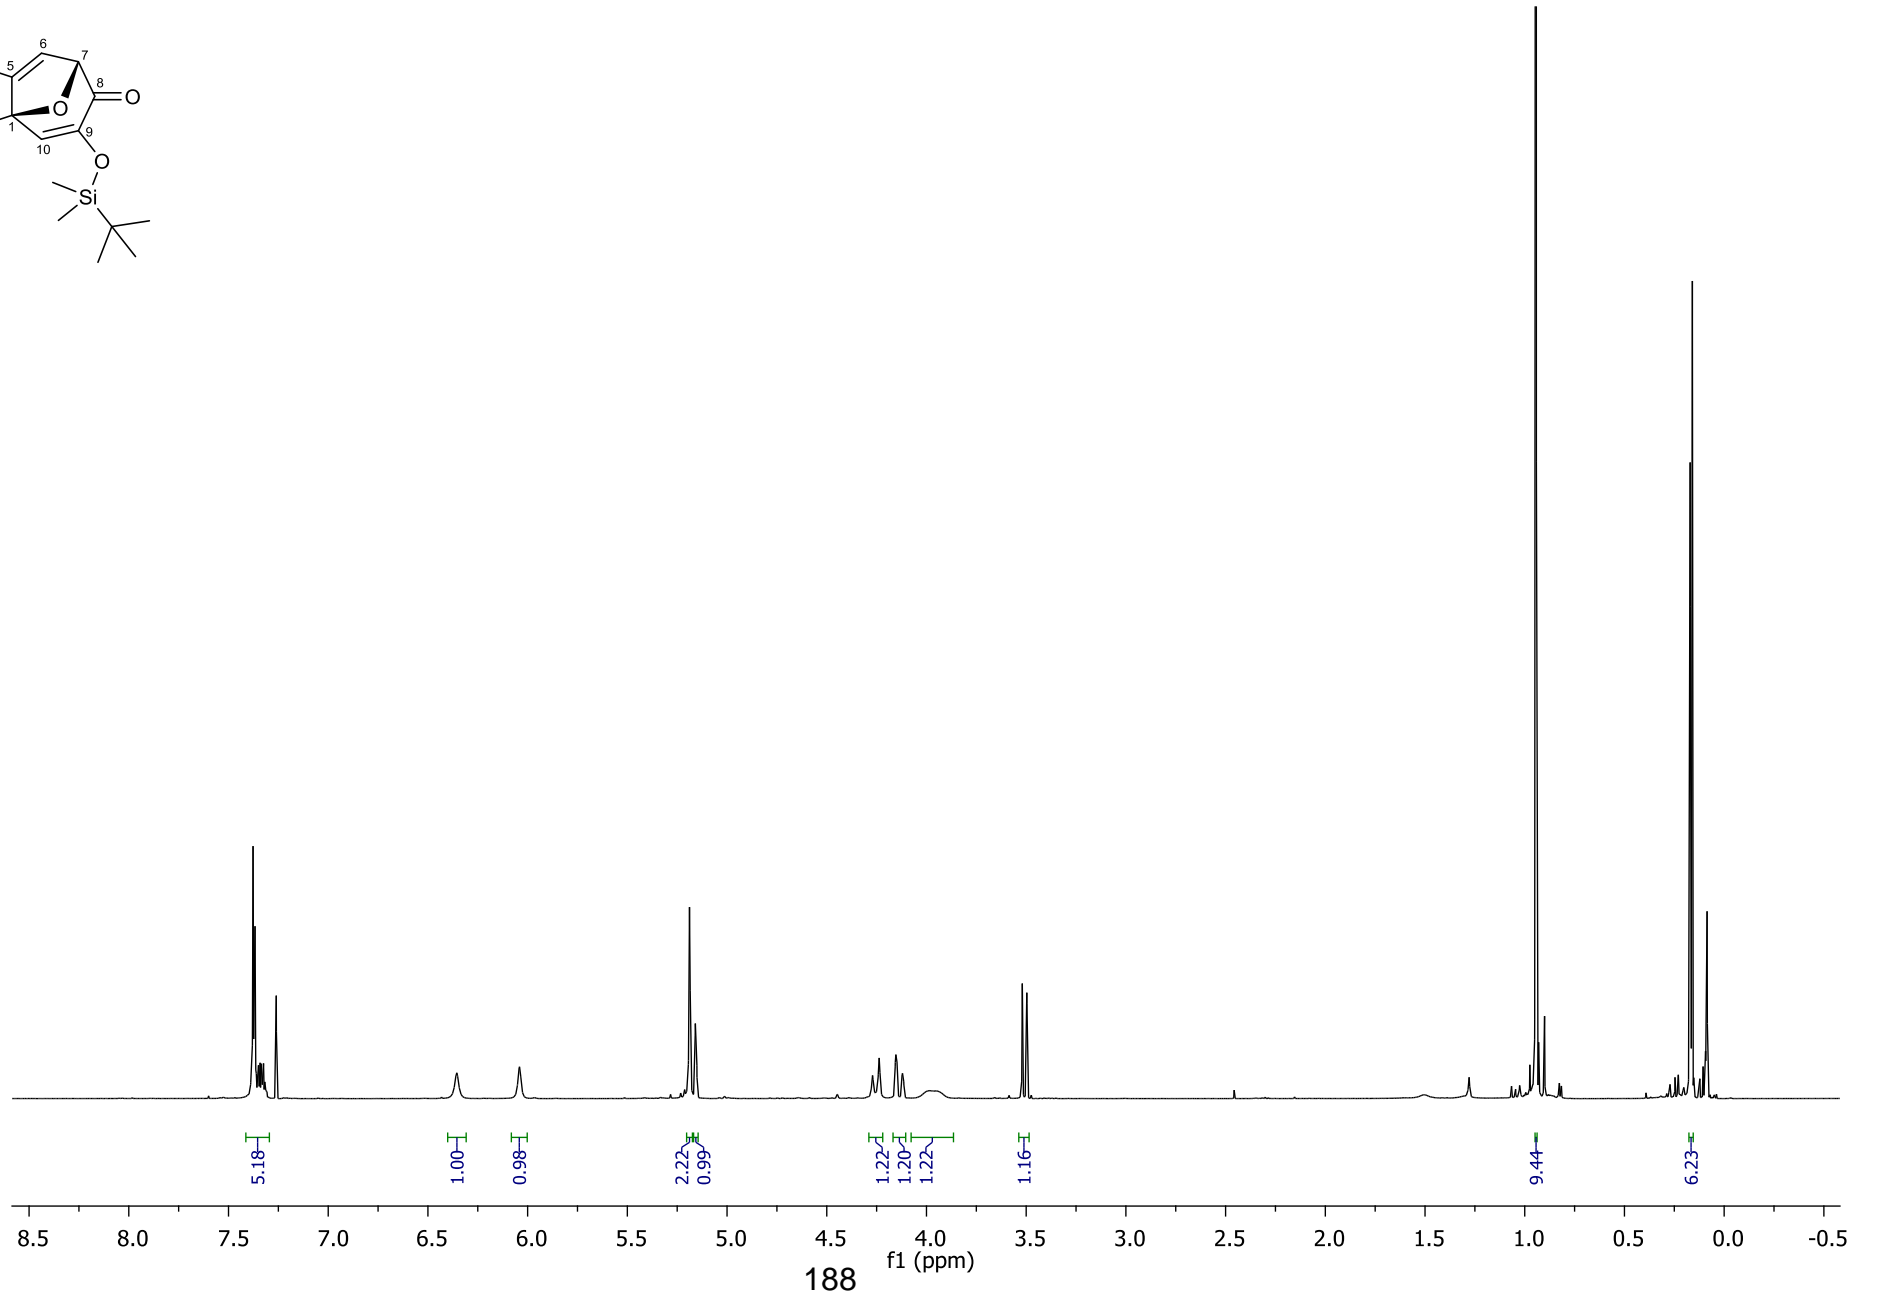

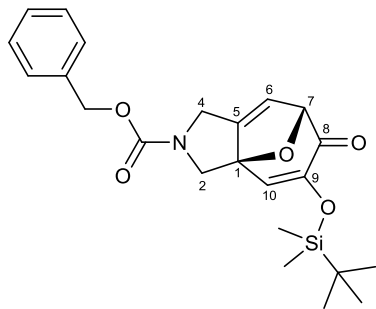

2b

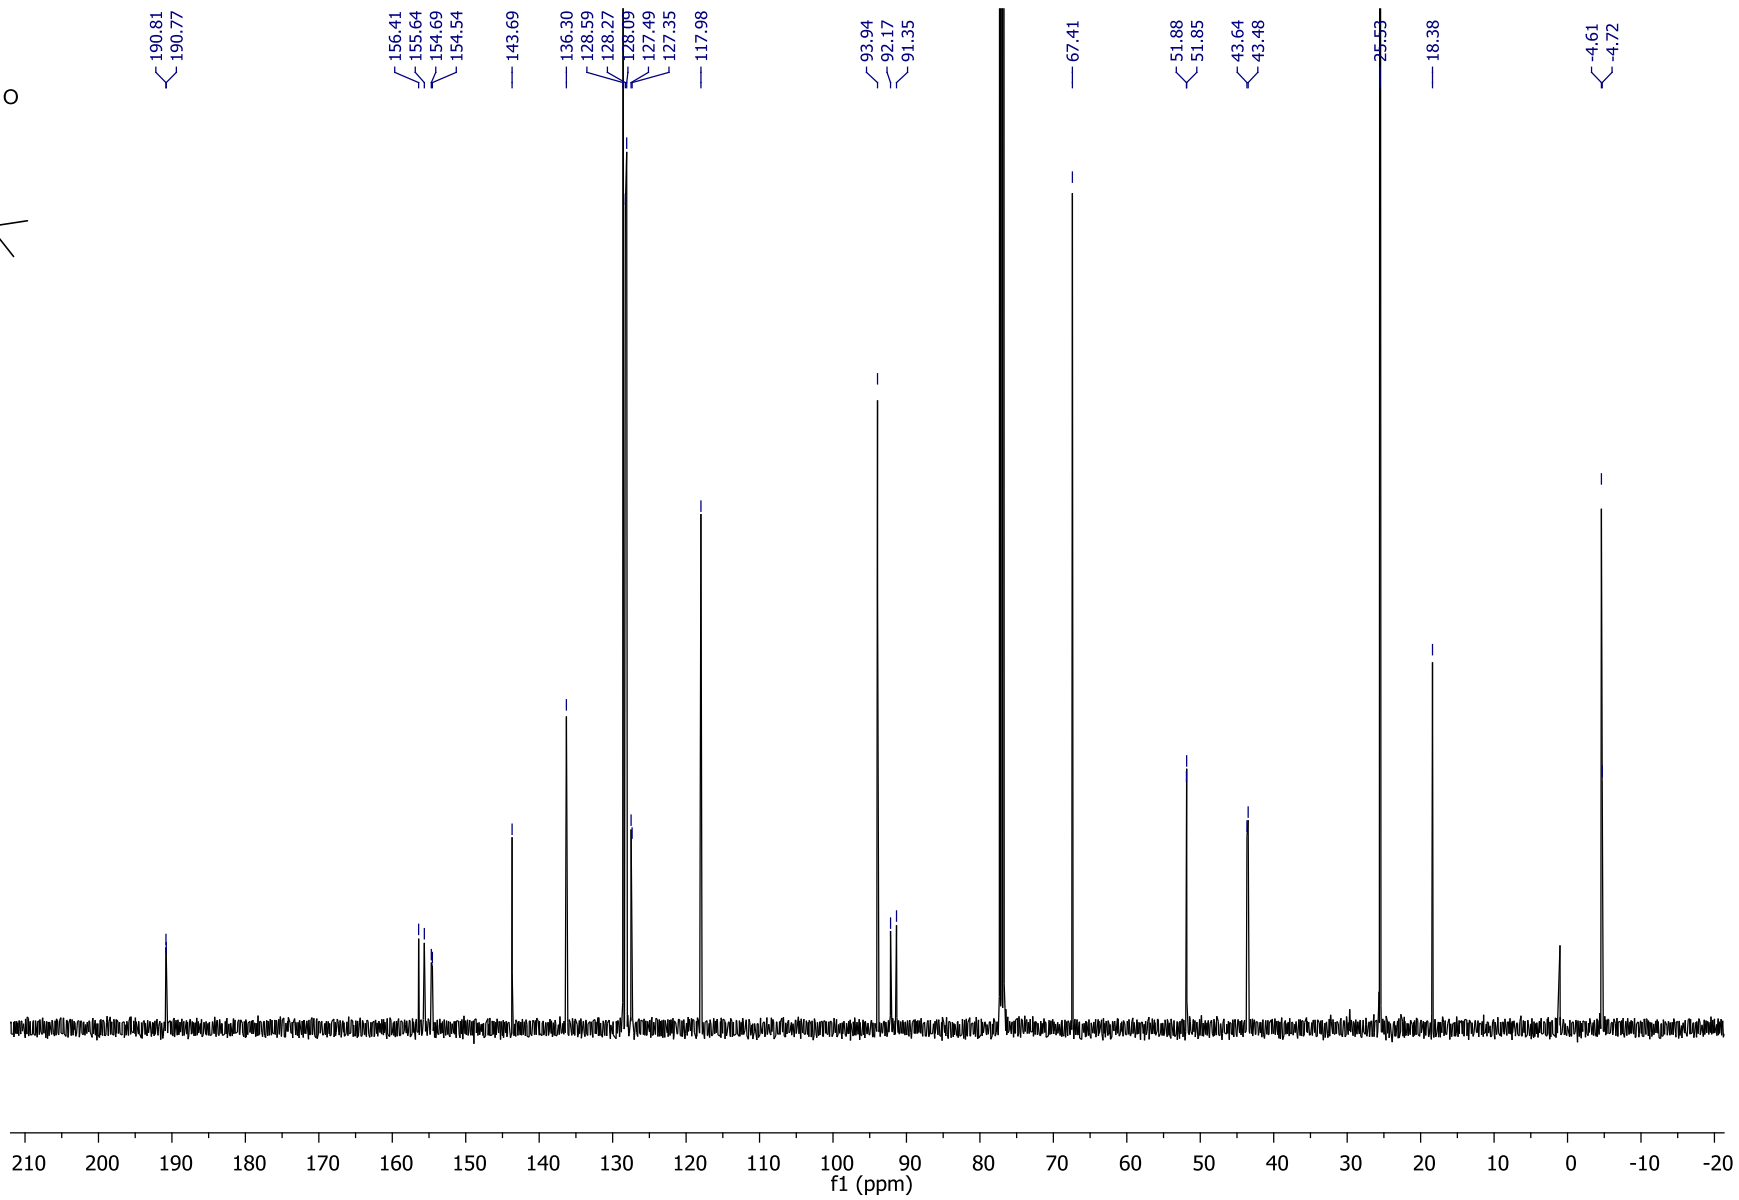

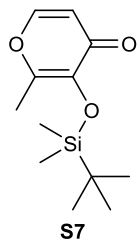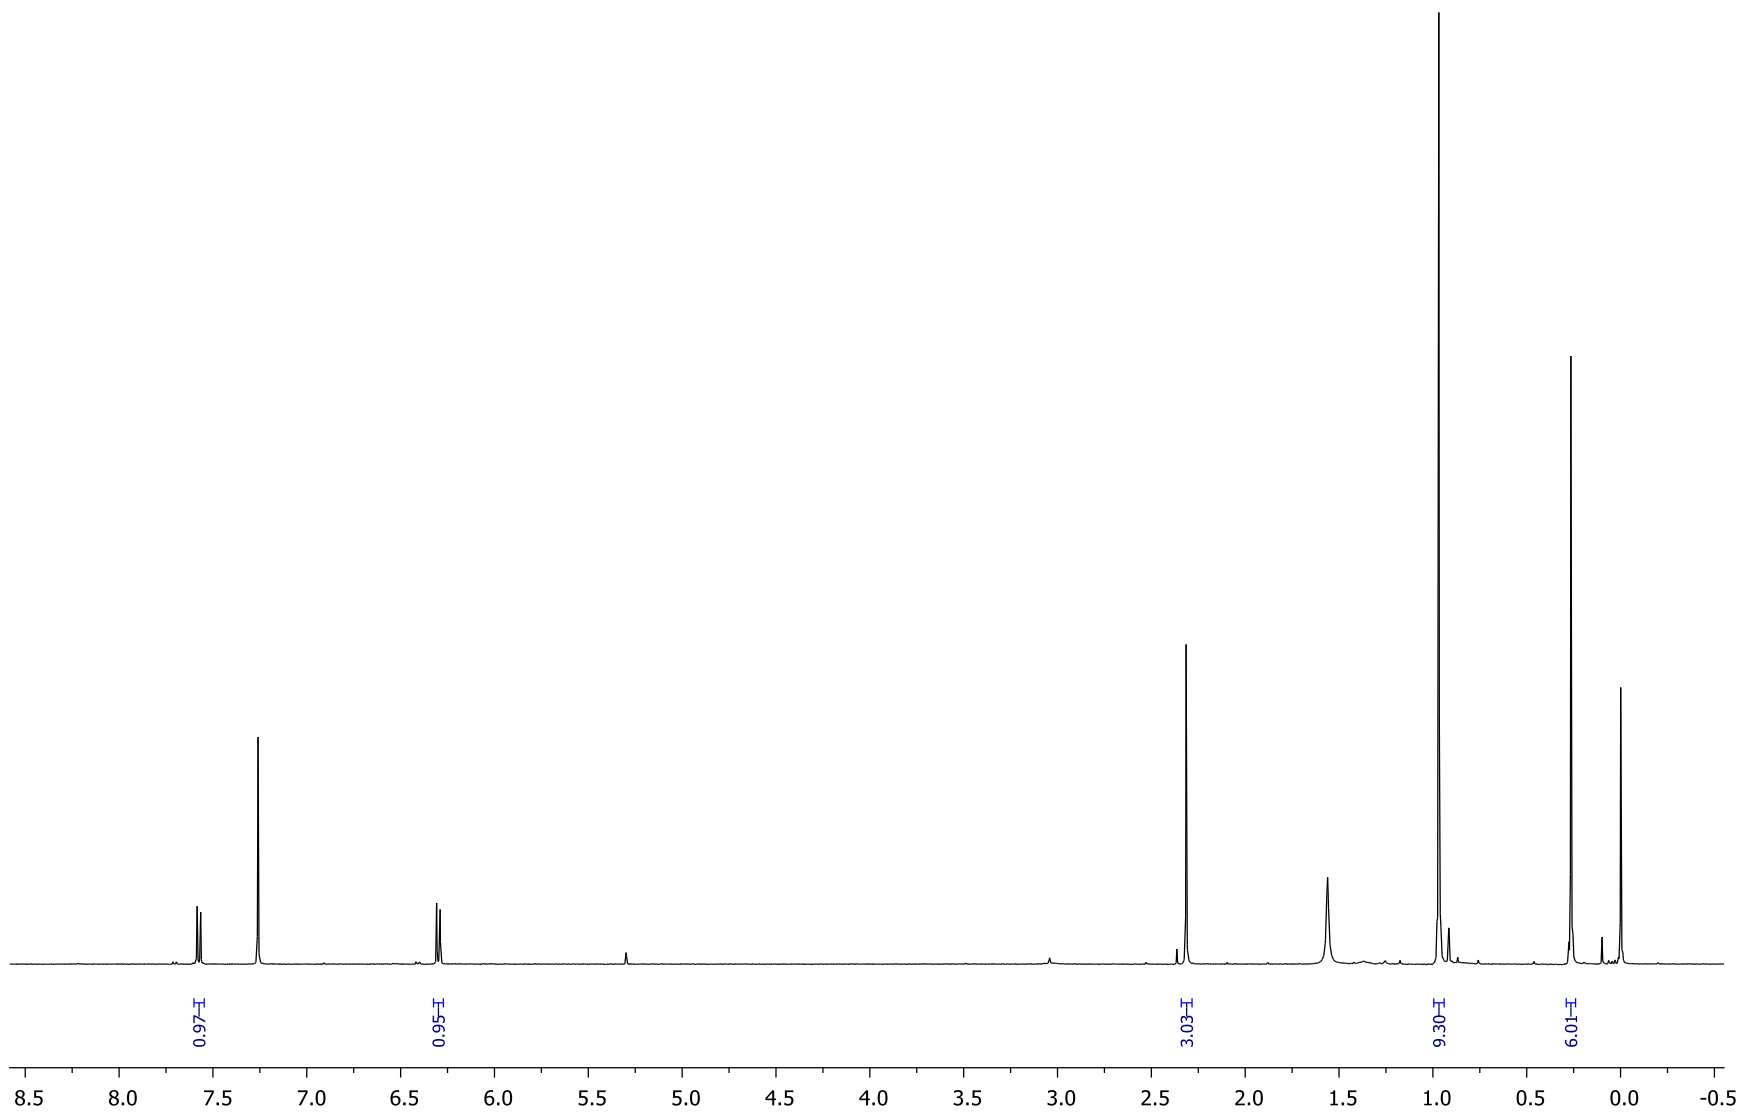

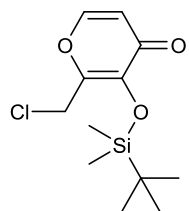

**S8**

*carried forward crude*

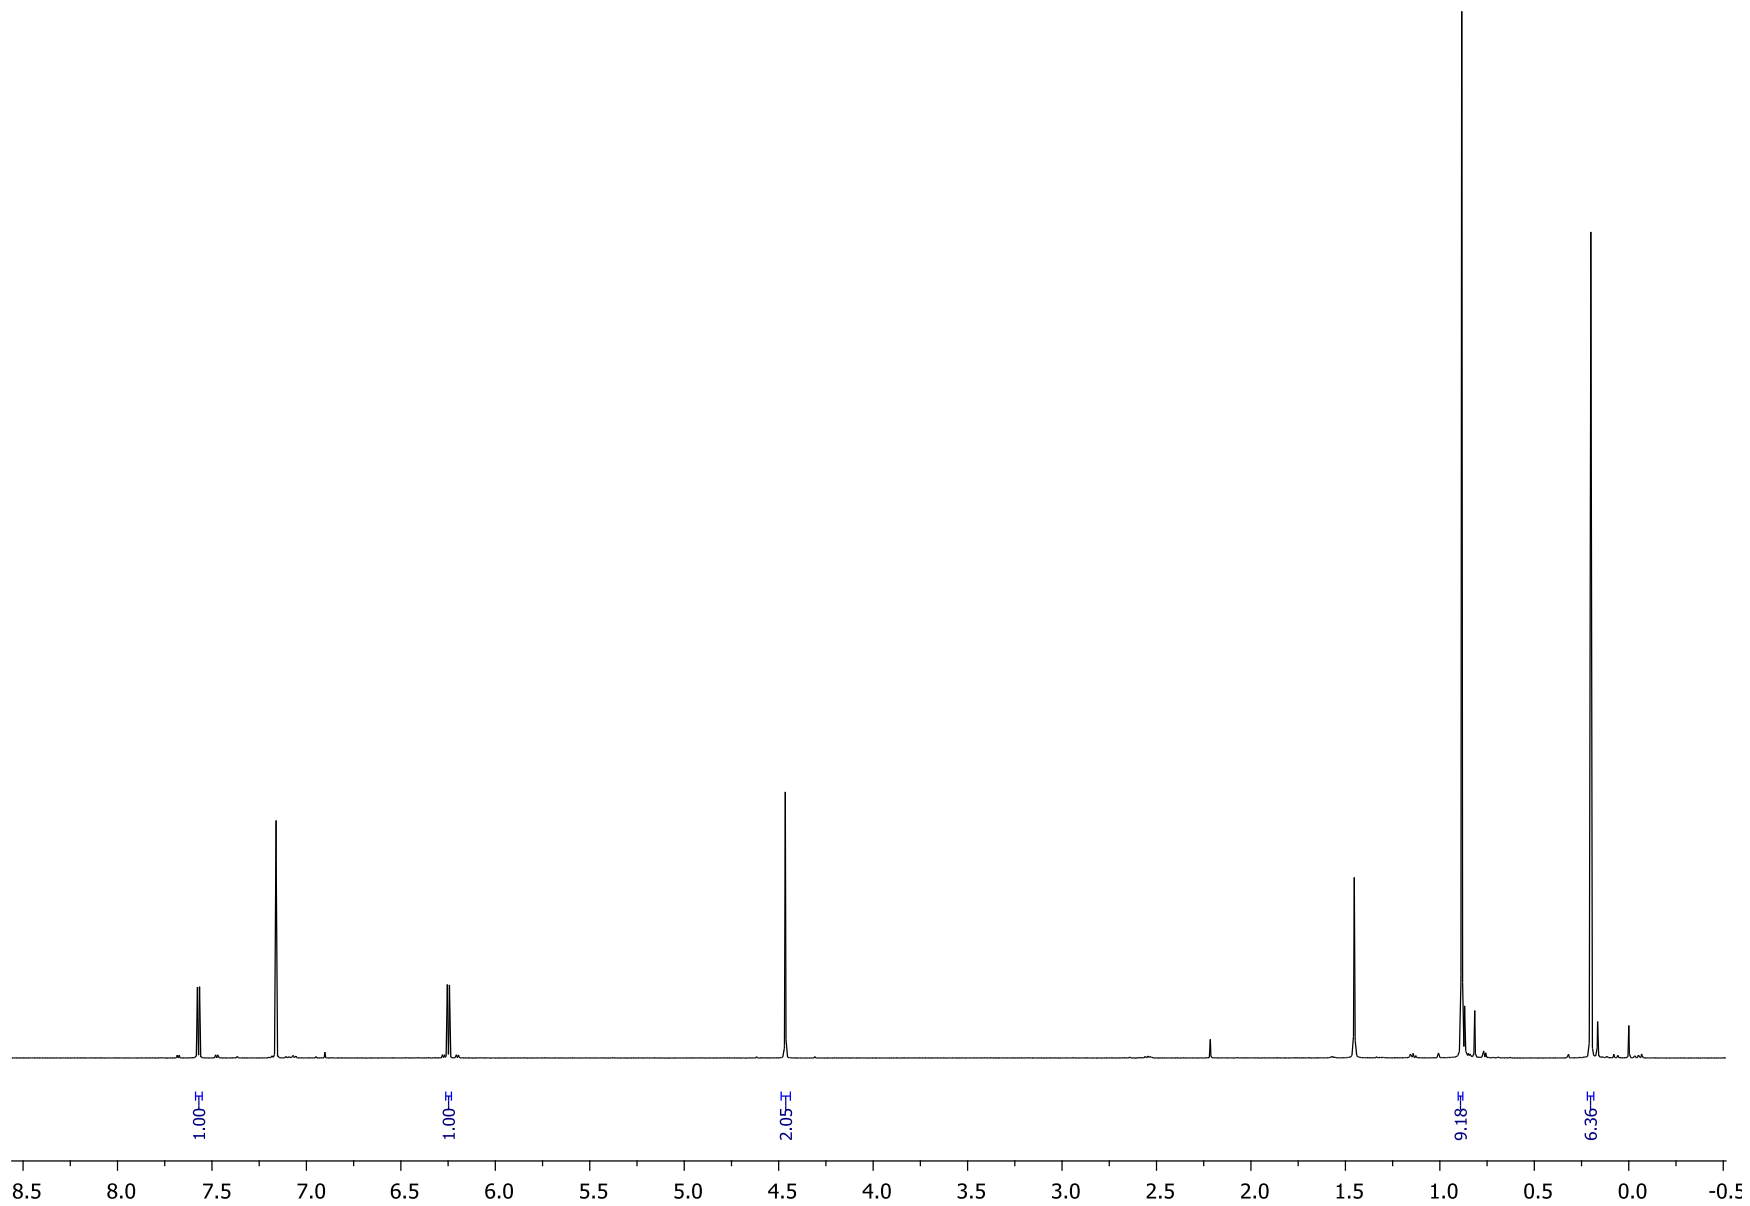

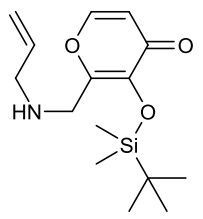

**S9**

*carried forward crude*

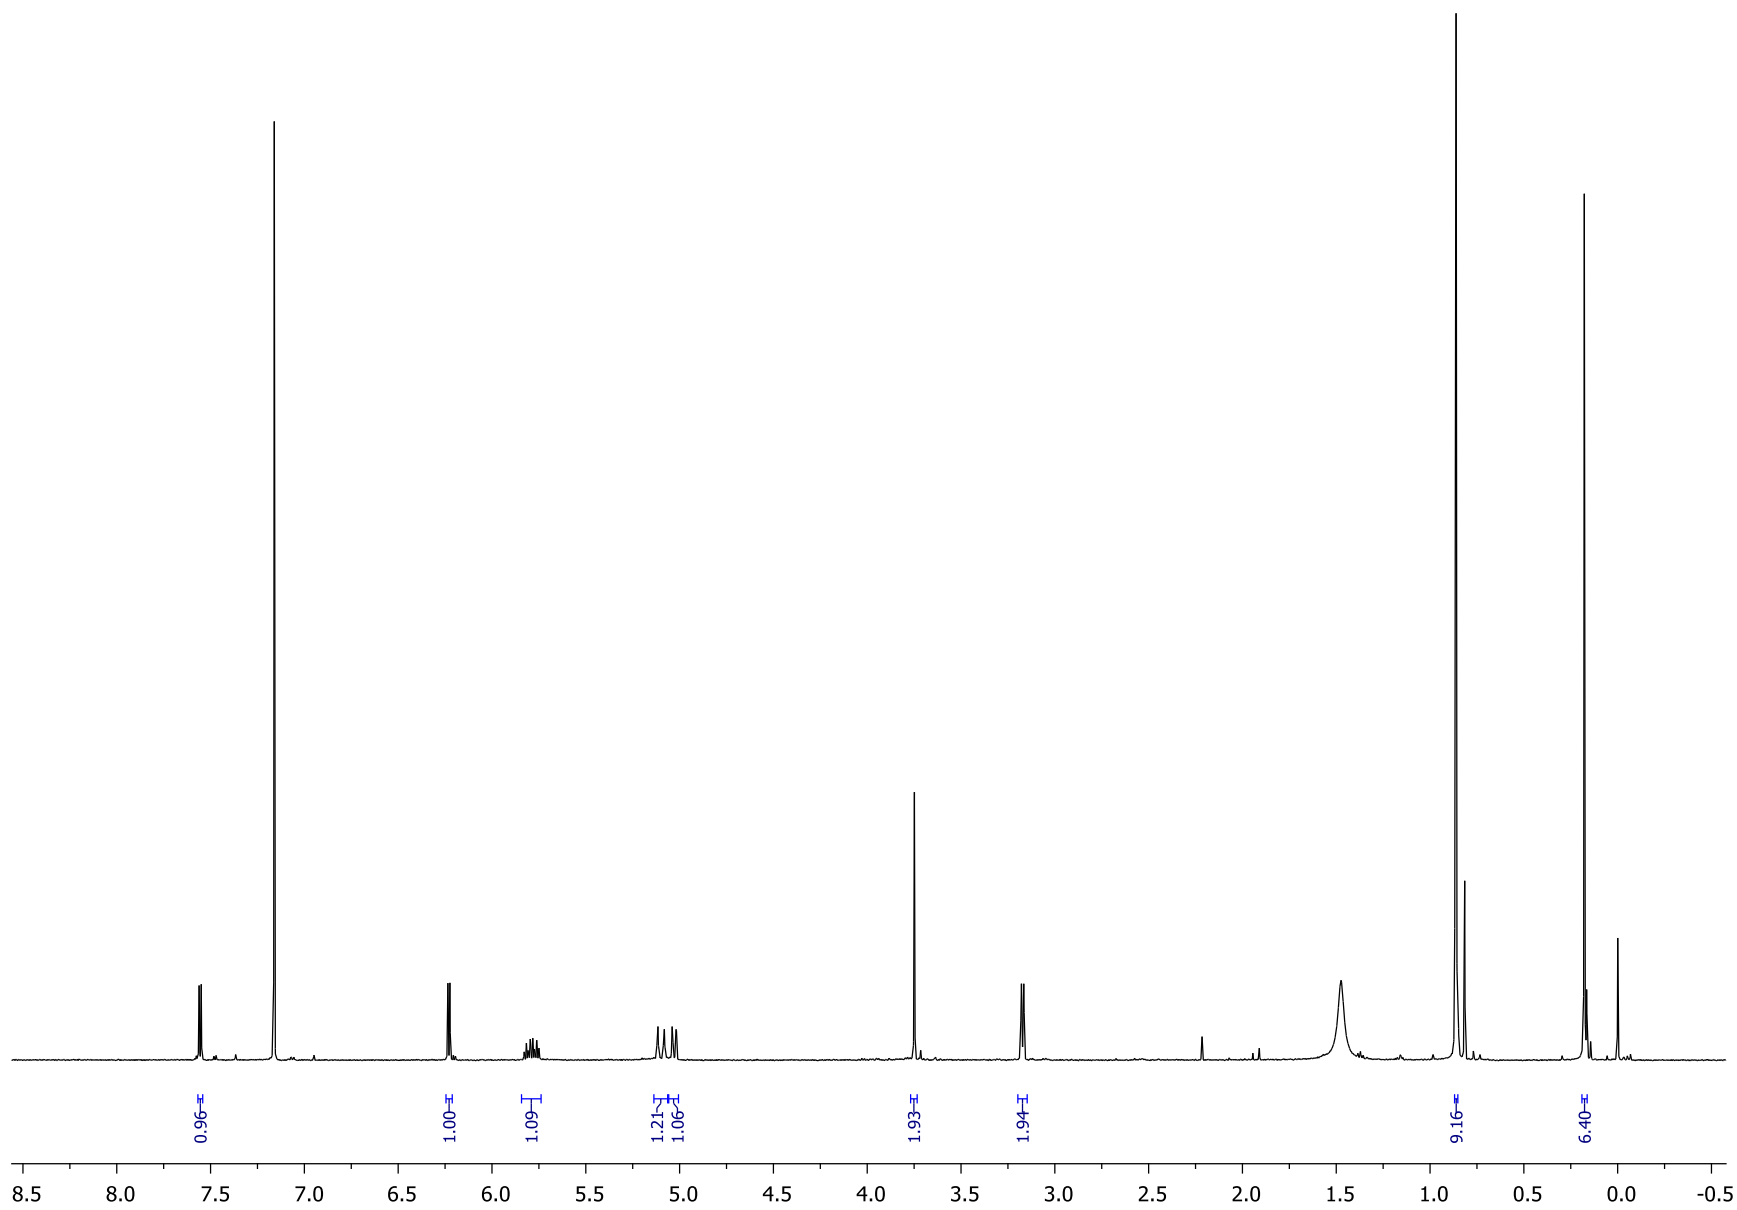

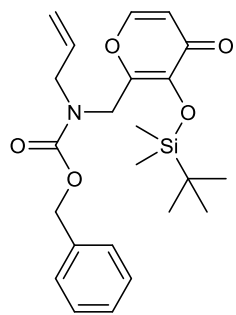

**S10**

*carried forward crude*

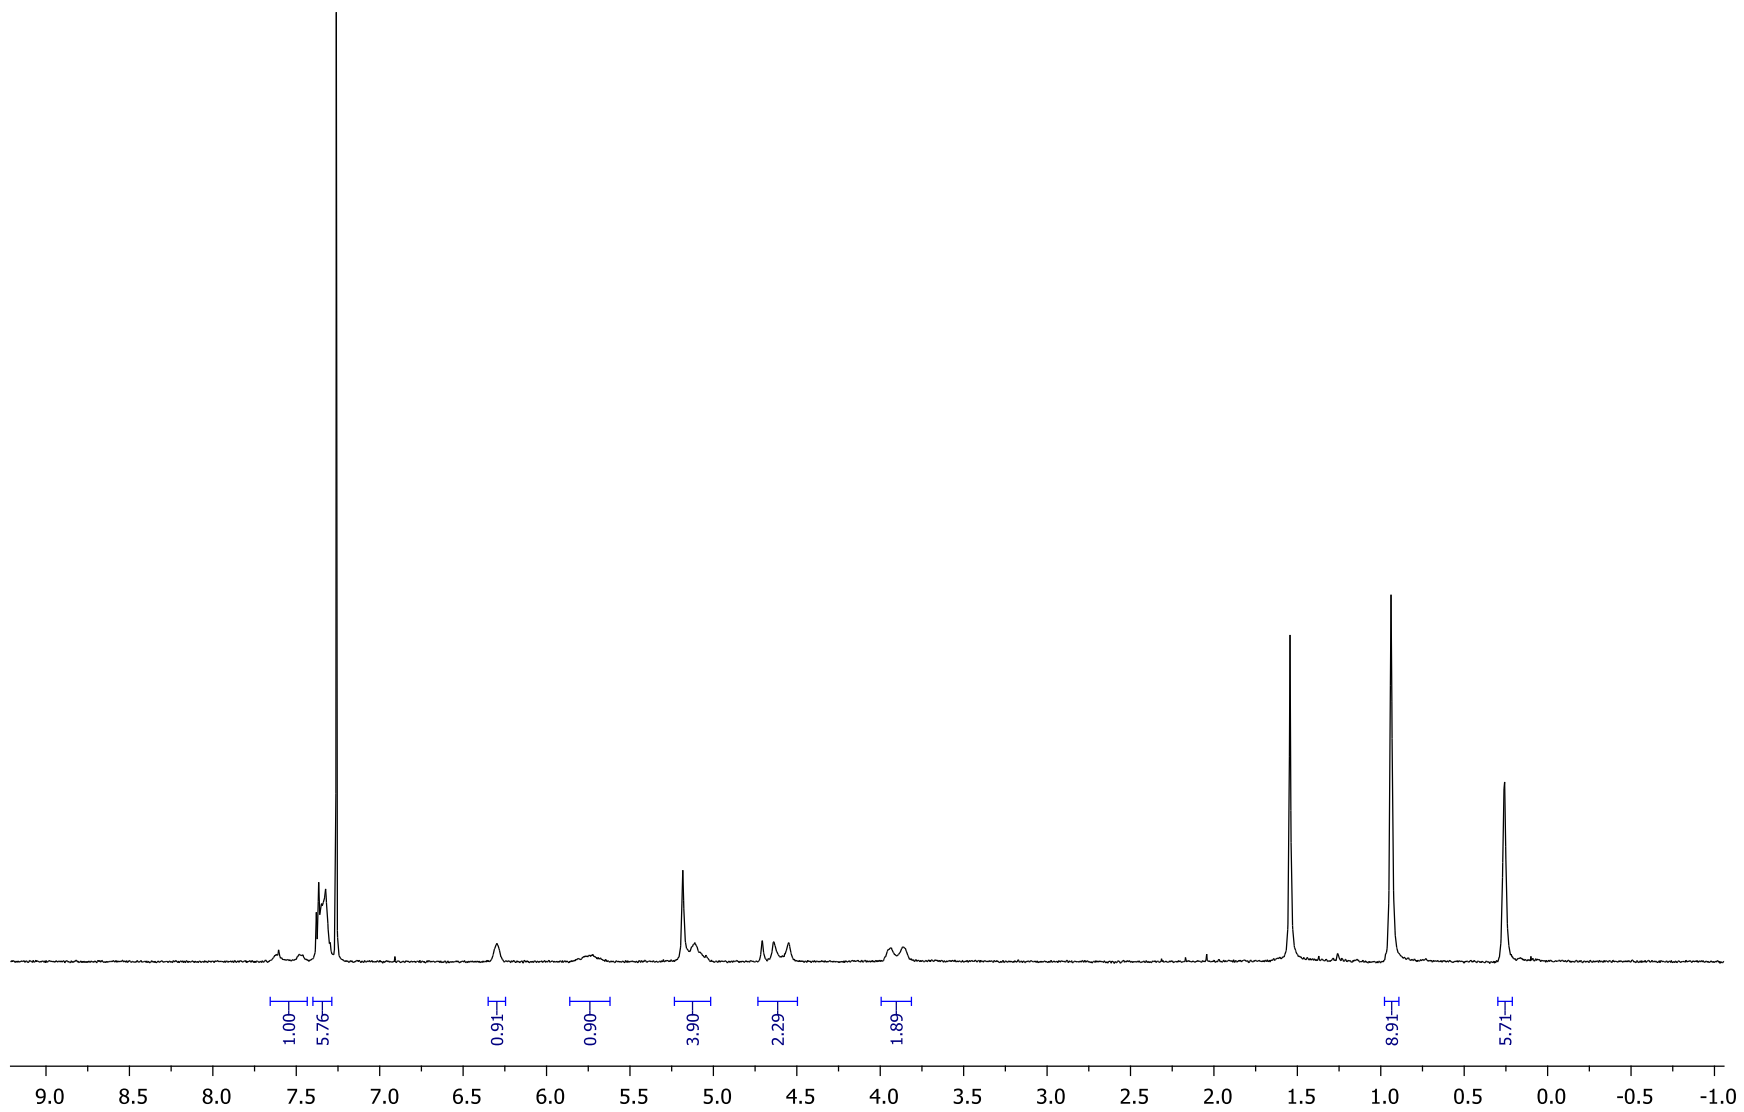

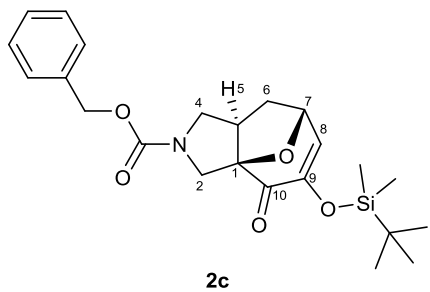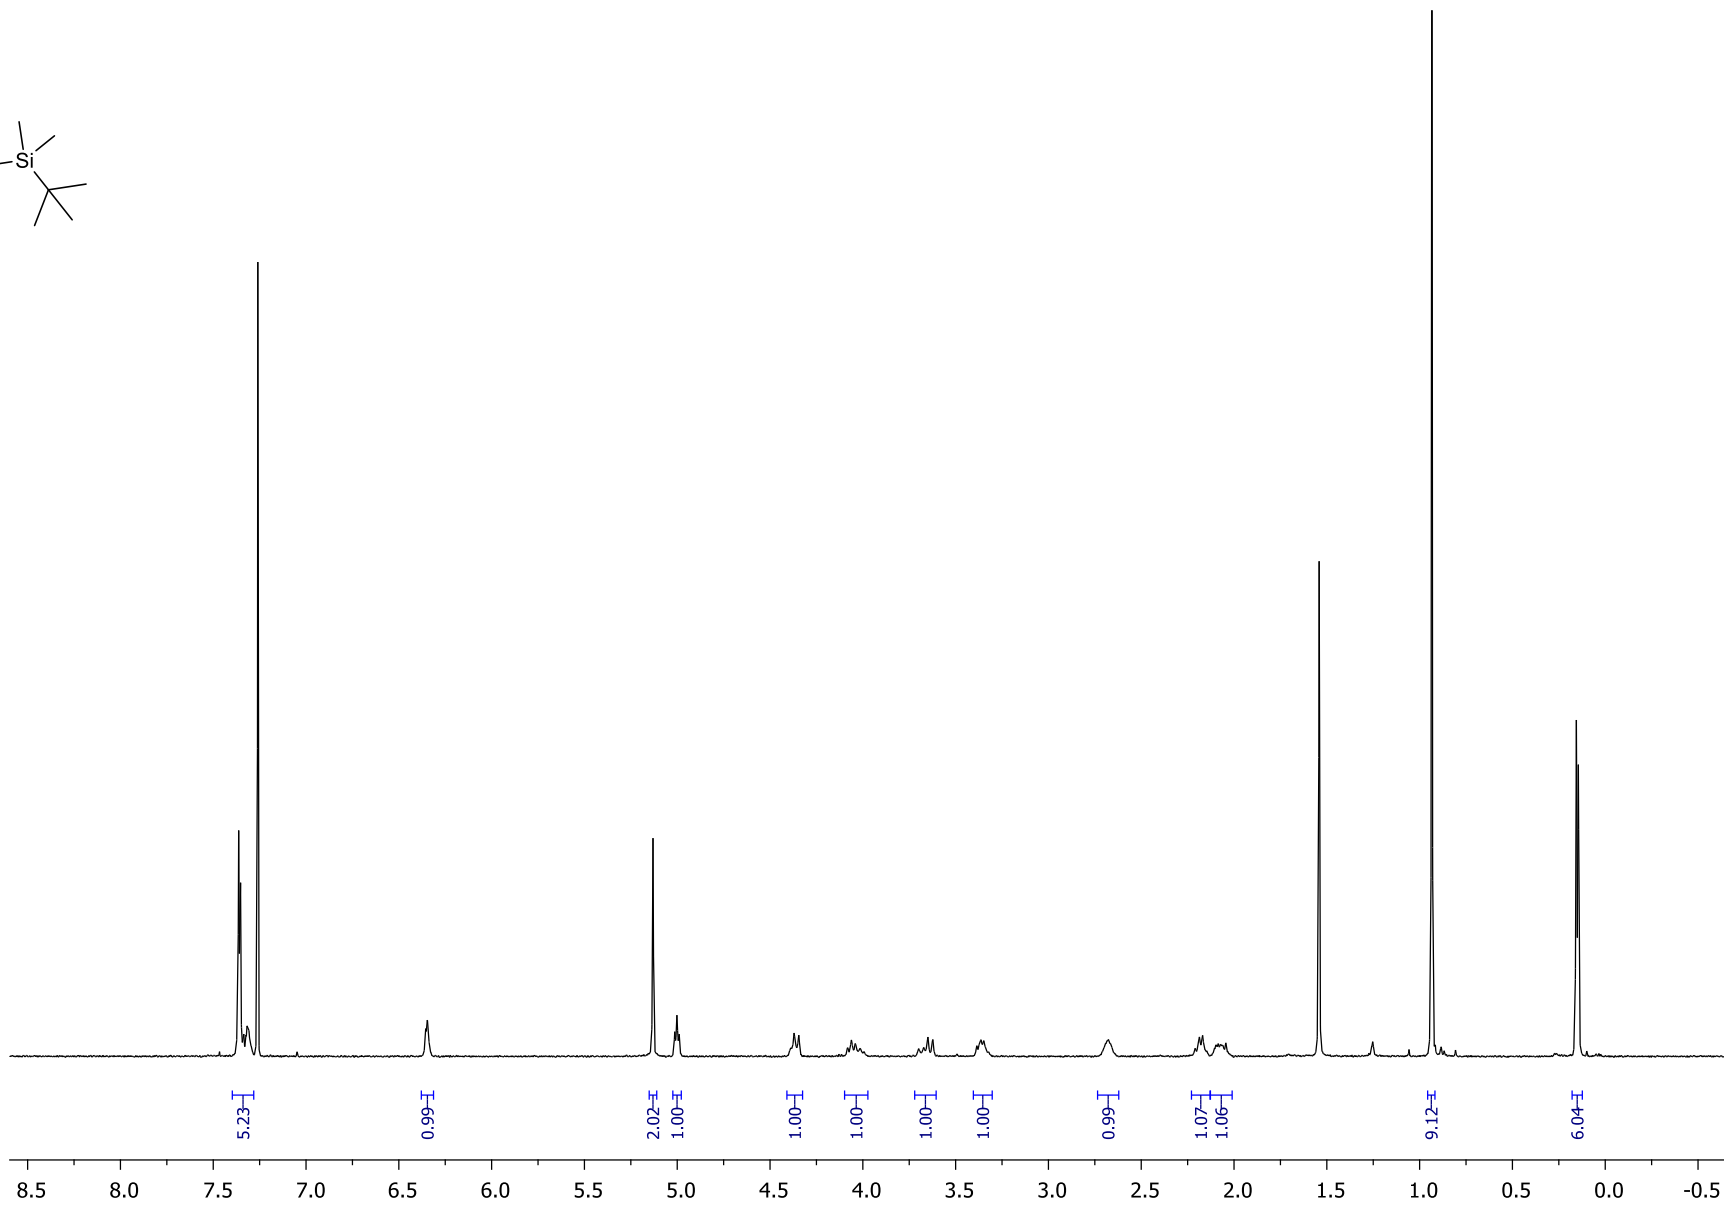

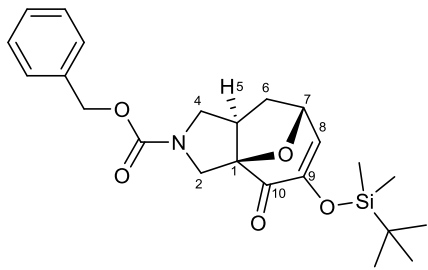

**2c**

CDCl<sub>3</sub> @ 329 K

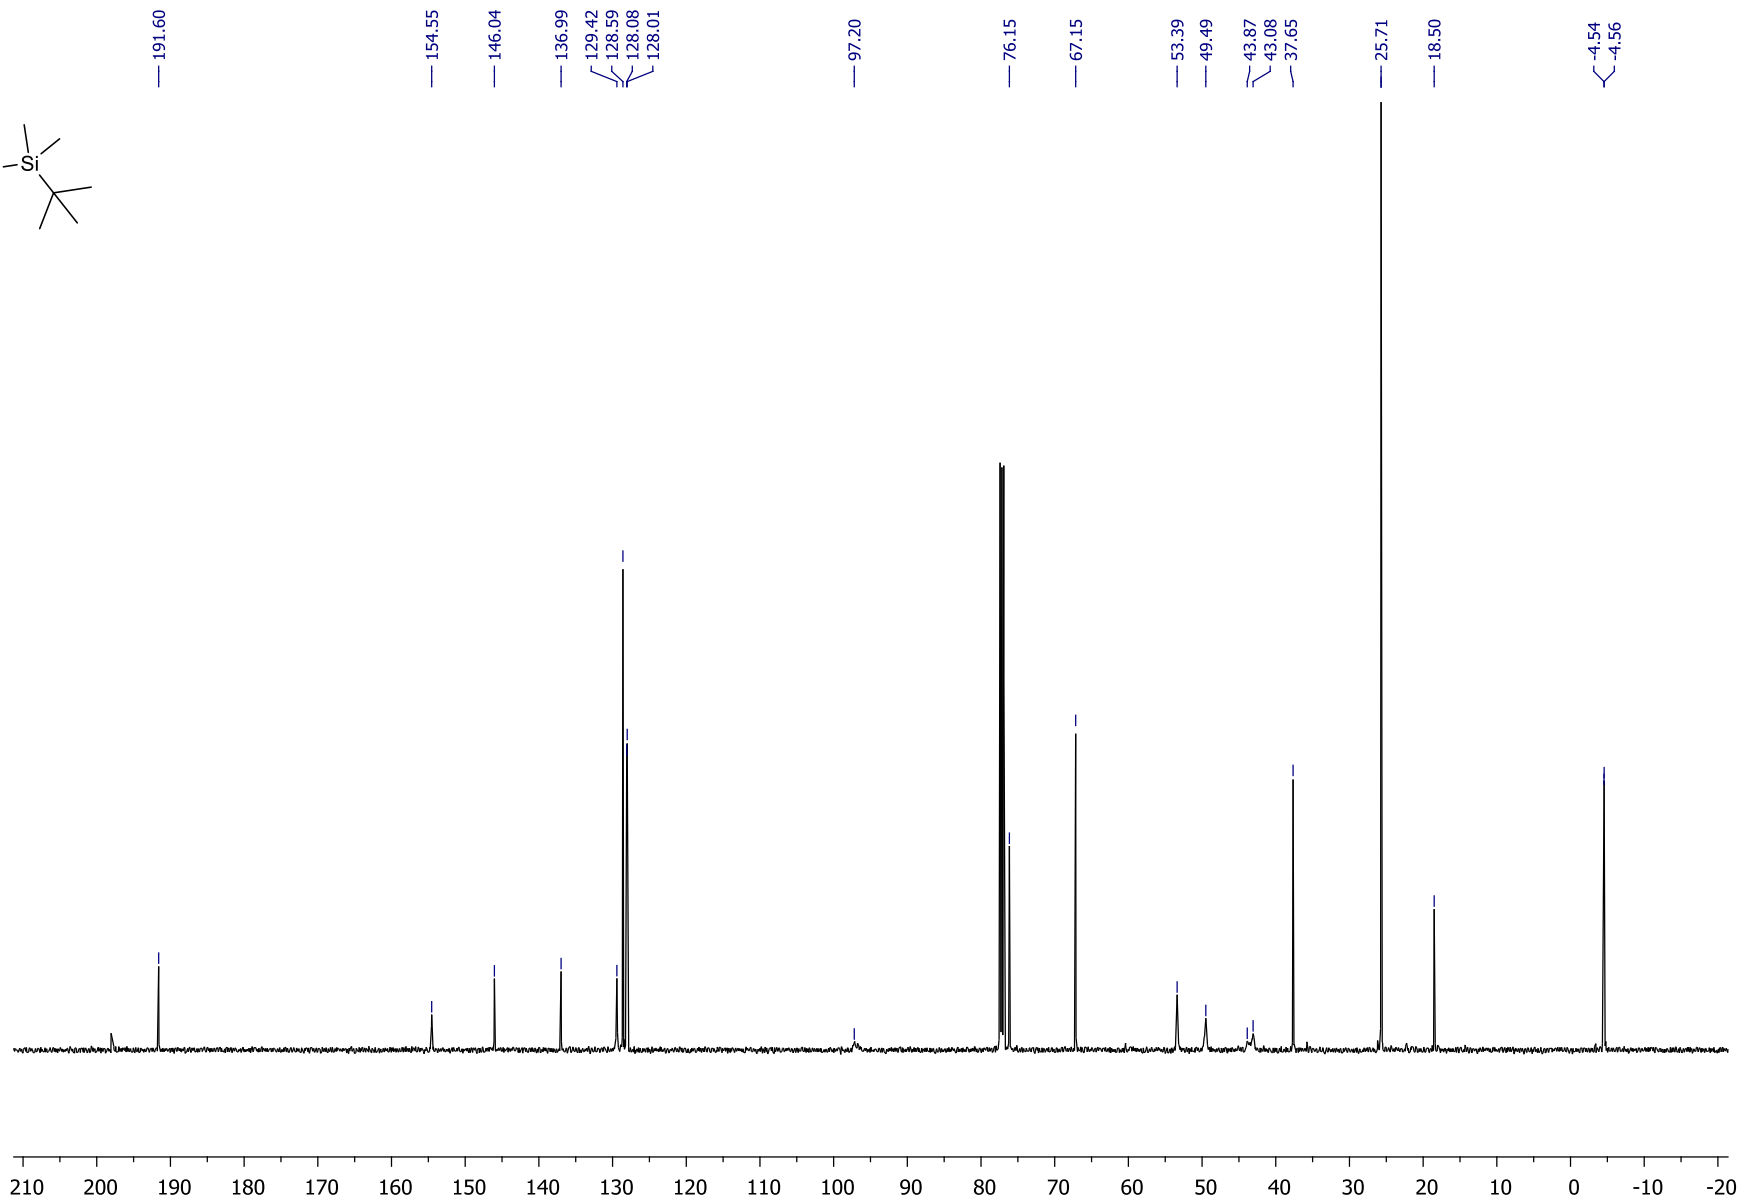



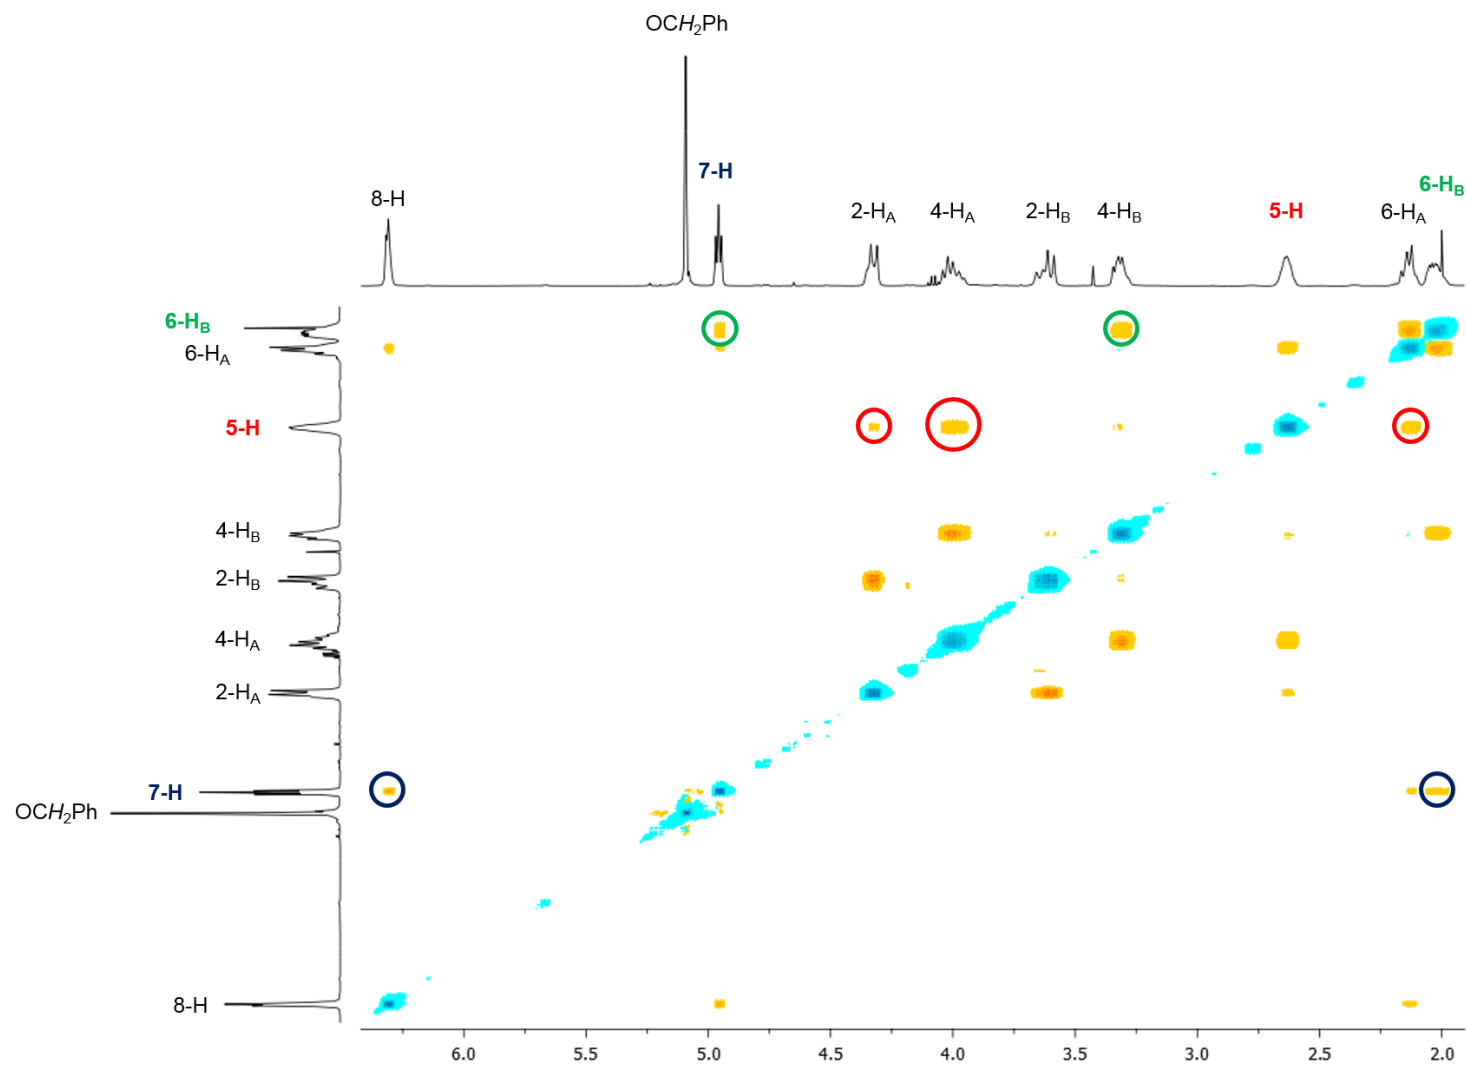

**2c NOESY correlations:**

**5-H:** 2-H<sub>A</sub>; 4-H<sub>A</sub>; 6-H<sub>A</sub>

**6-H<sub>B</sub>:** 4-H<sub>B</sub>; 7-H

**7-H:** 6-H<sub>B</sub>; 8-H

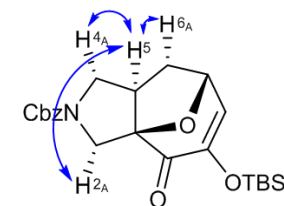

**5-H**

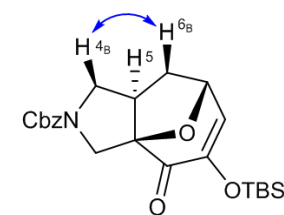

**6-H<sub>B</sub>**

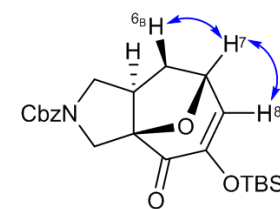

**7-H**

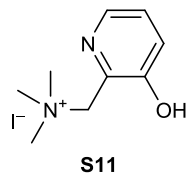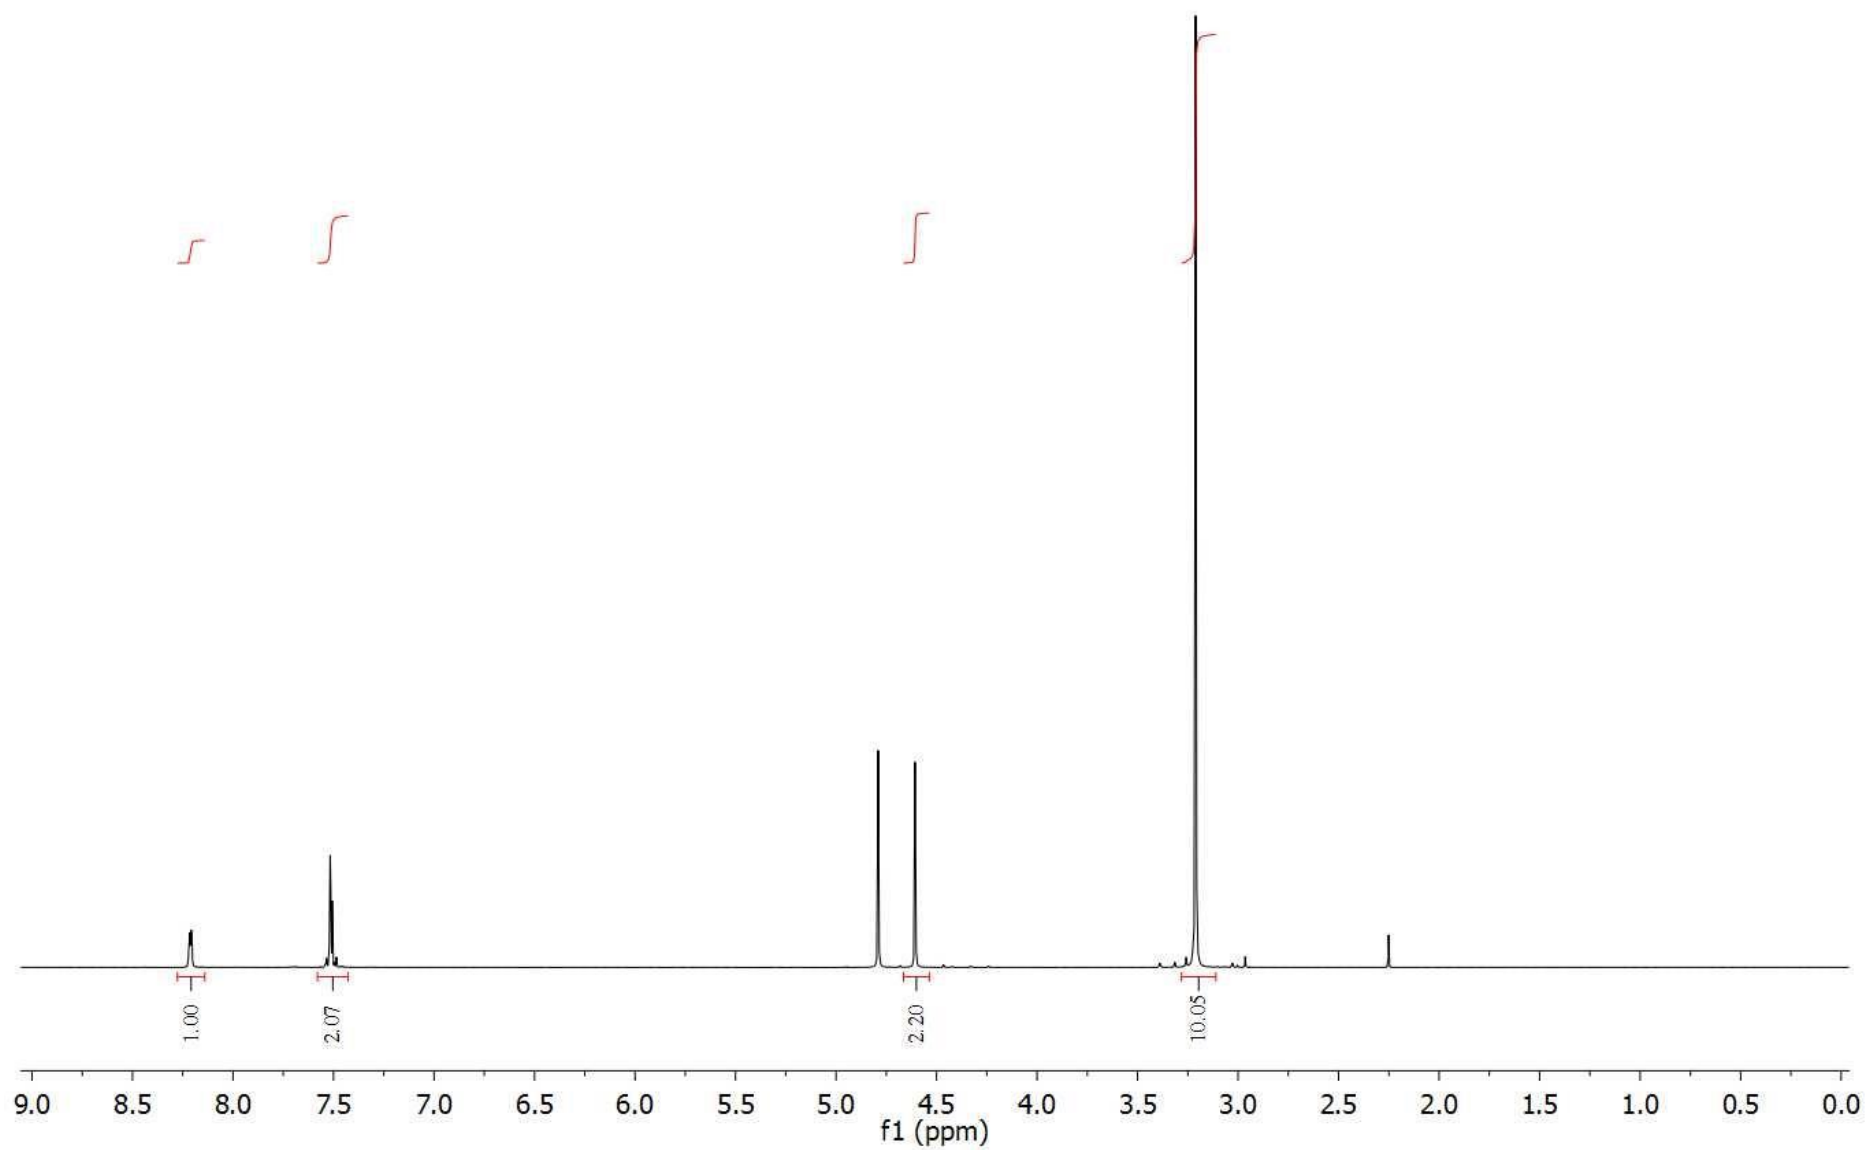

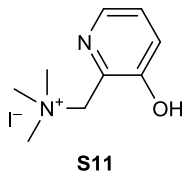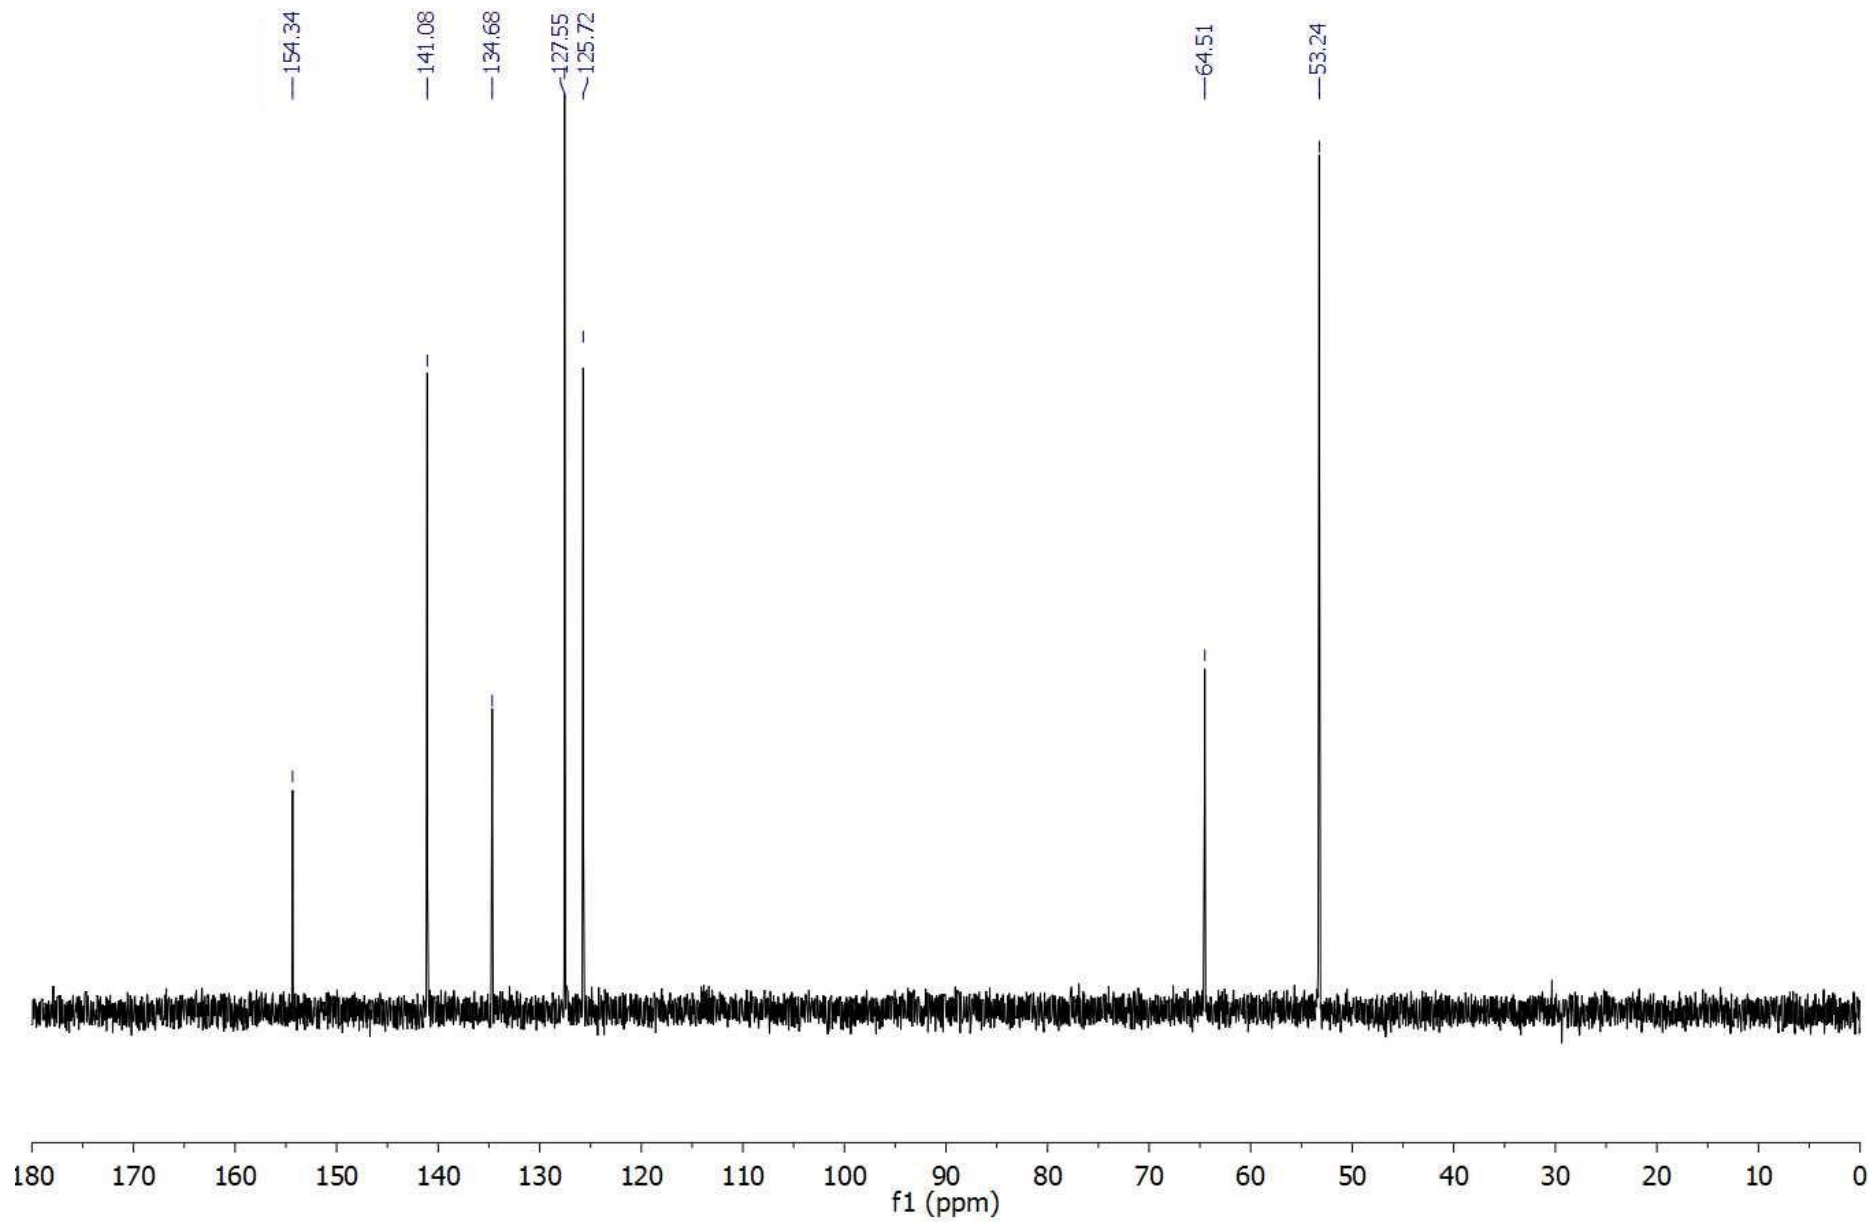

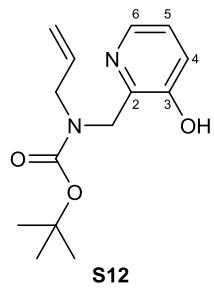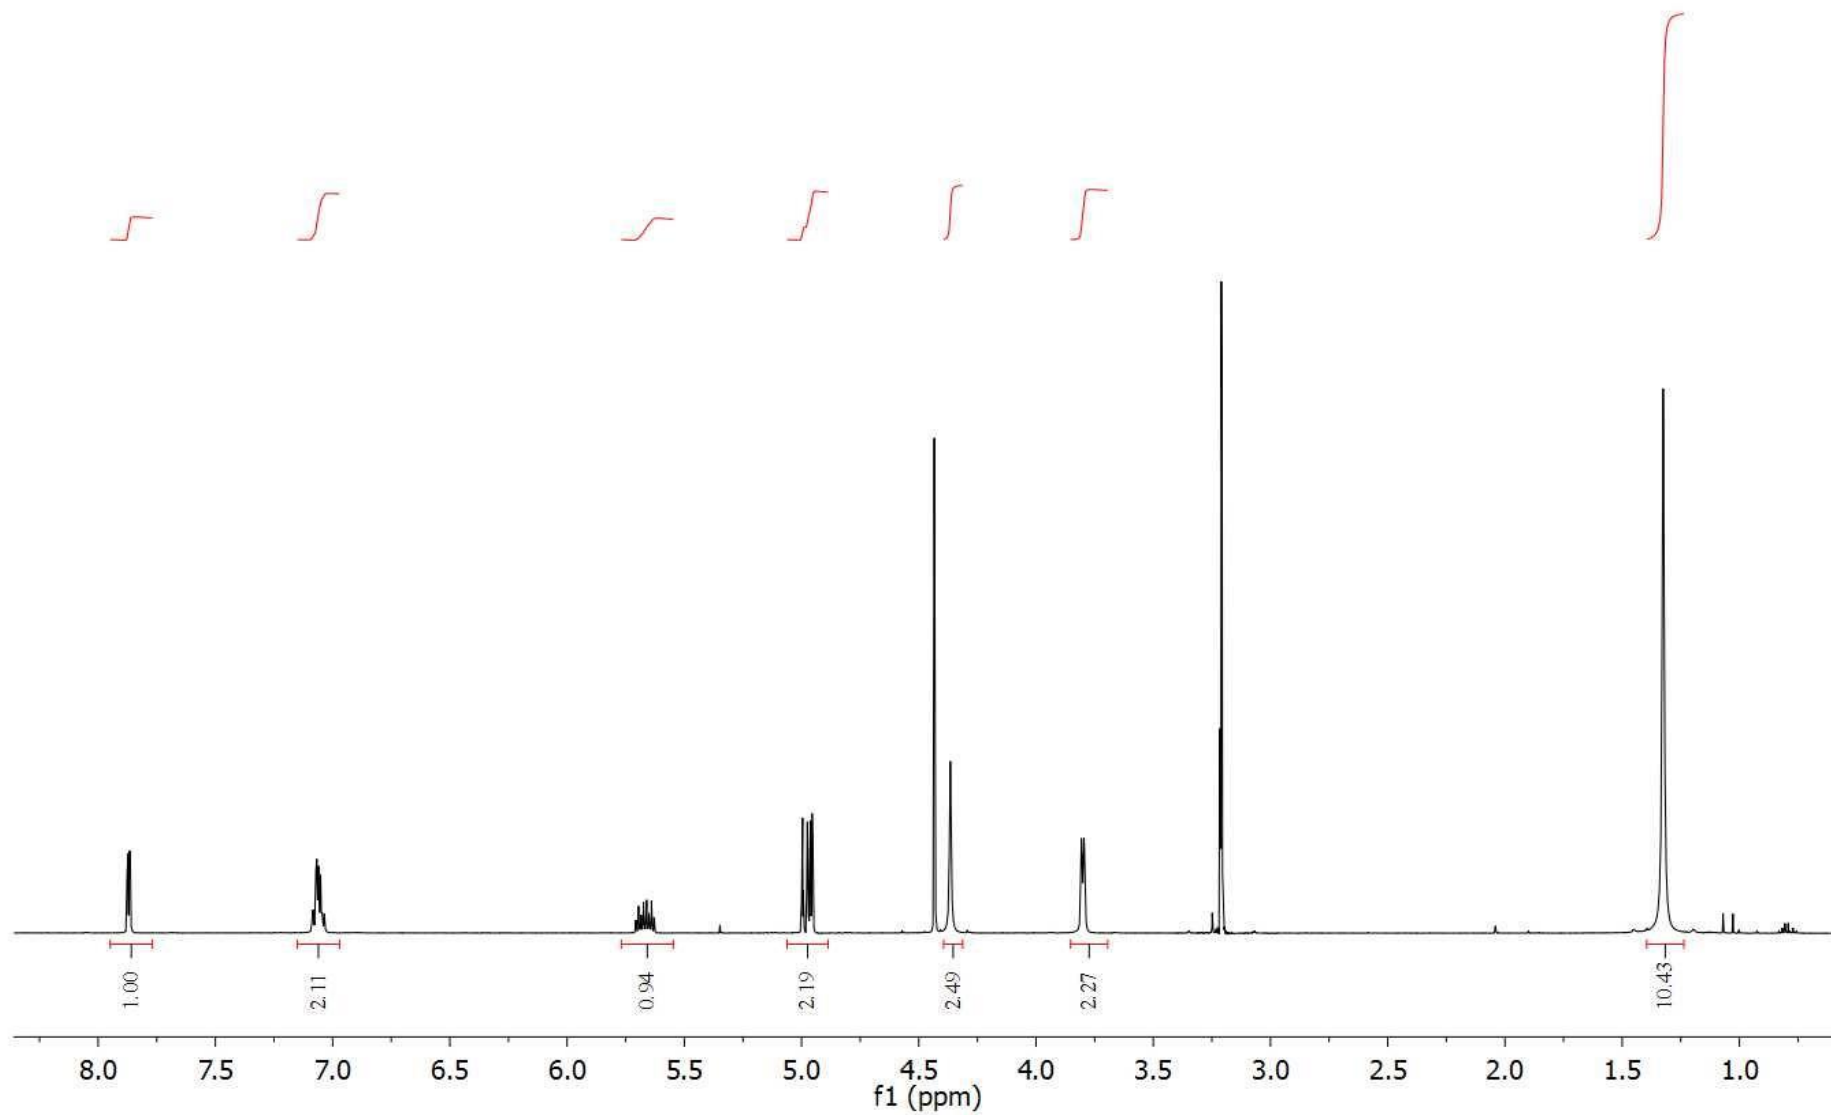

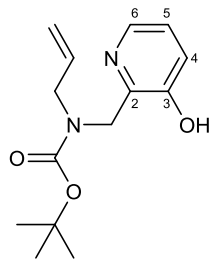

**S12**  
(CD<sub>3</sub>OD @ 333 K)

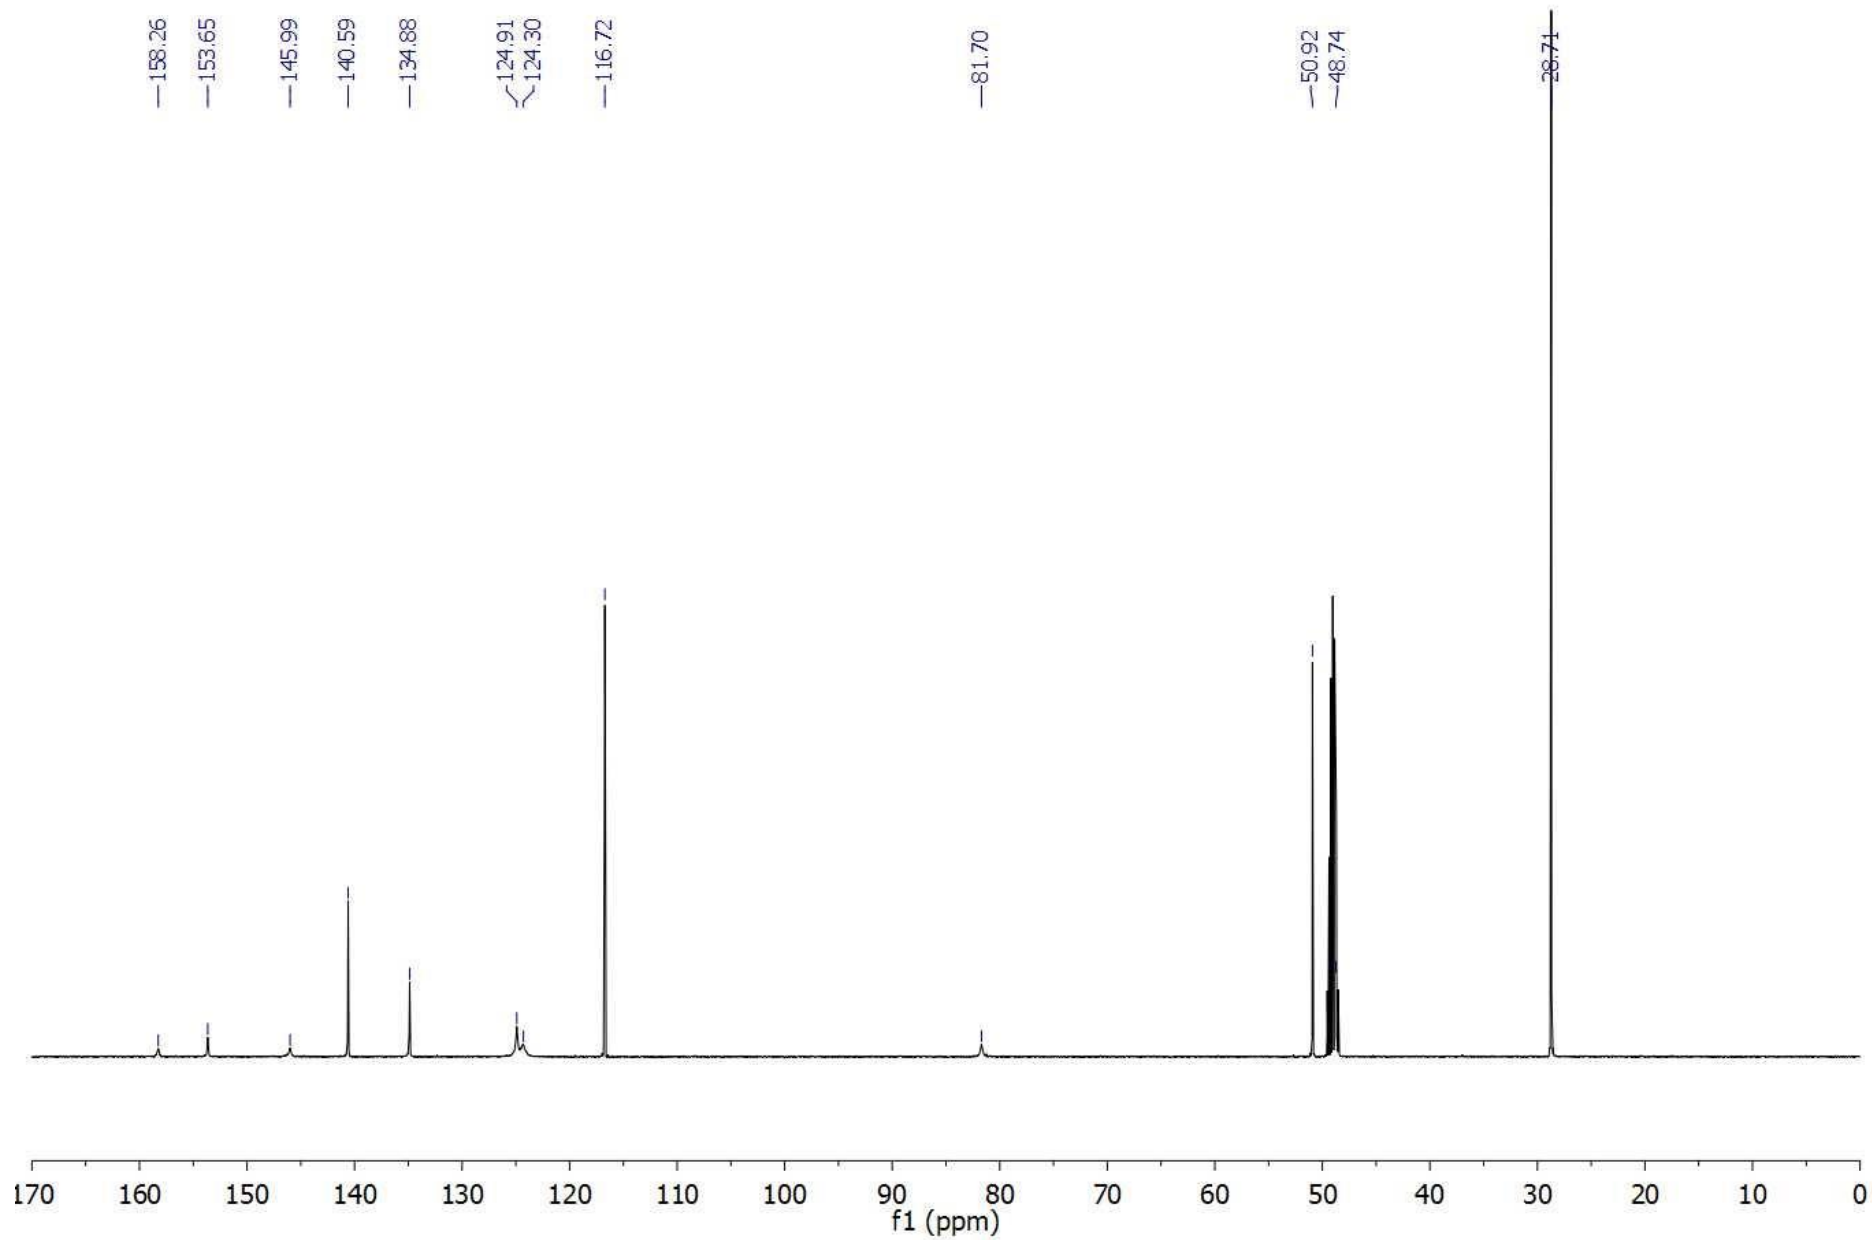

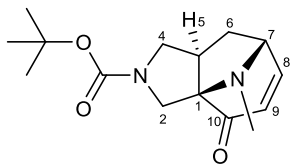

**2d**  
(CD<sub>3</sub>OD @ 333 K)

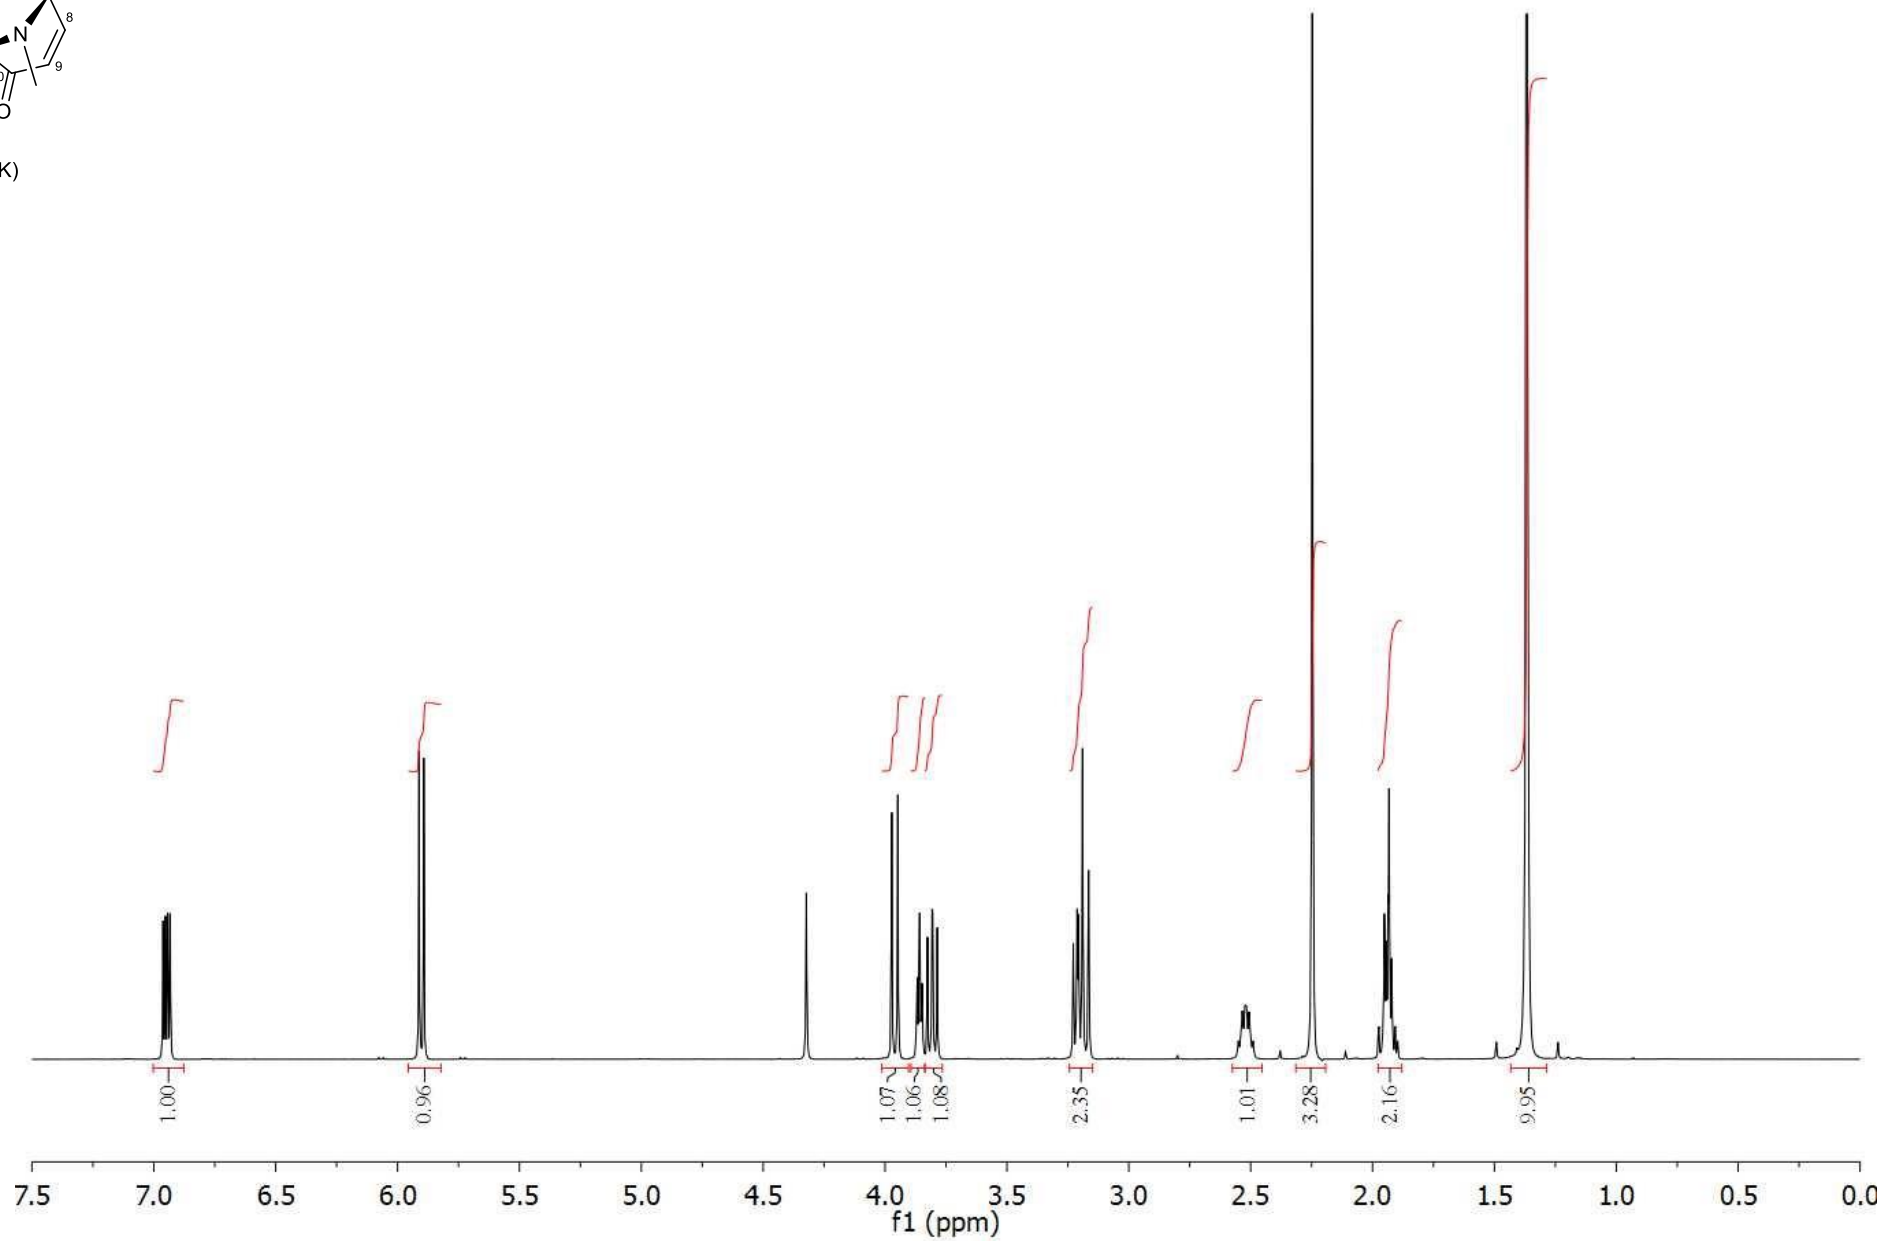

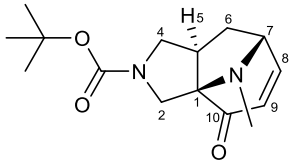

**2d**  
(CD<sub>3</sub>OD @ 333 K)

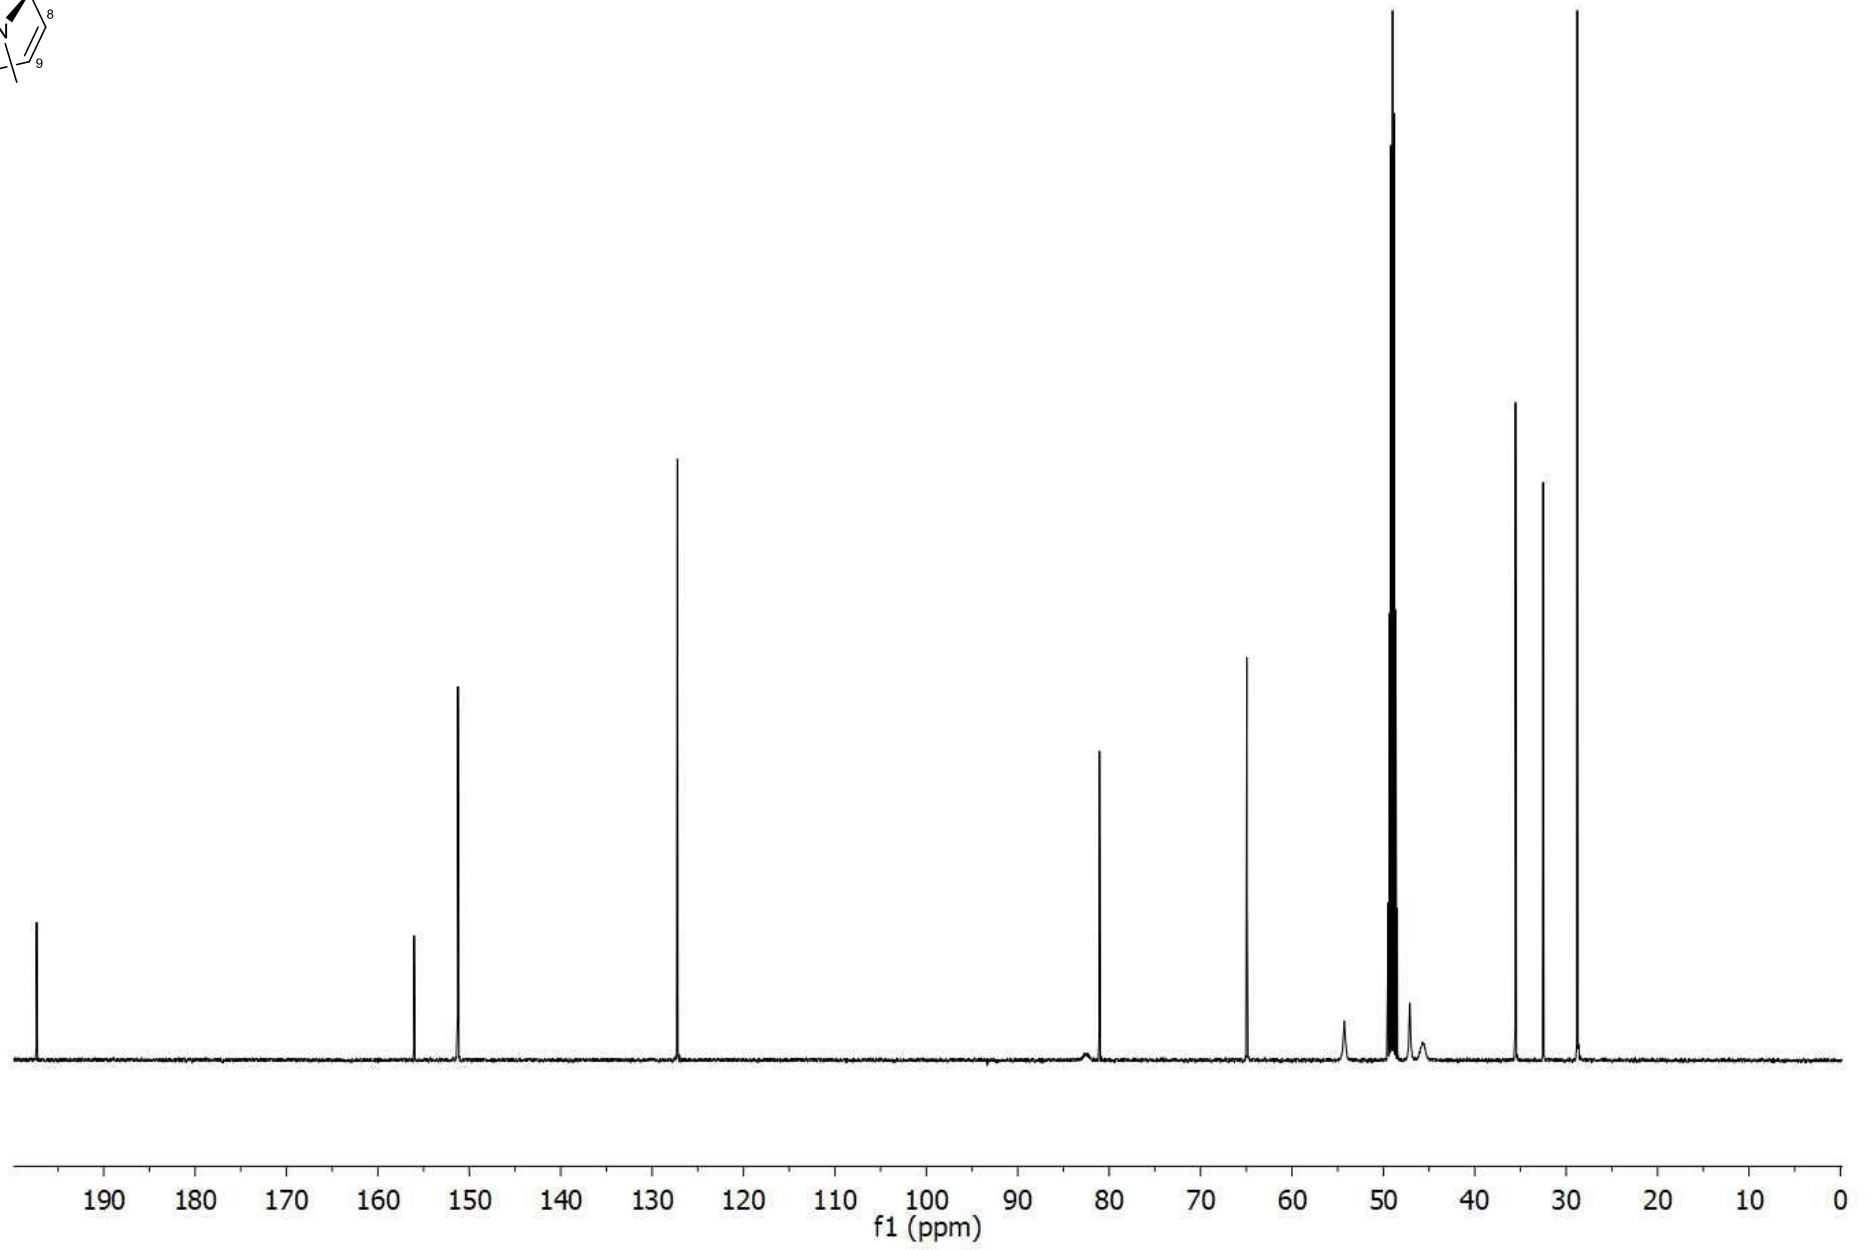

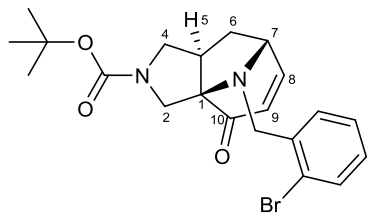

**2e**  
(CD<sub>3</sub>OD @ 333 K)

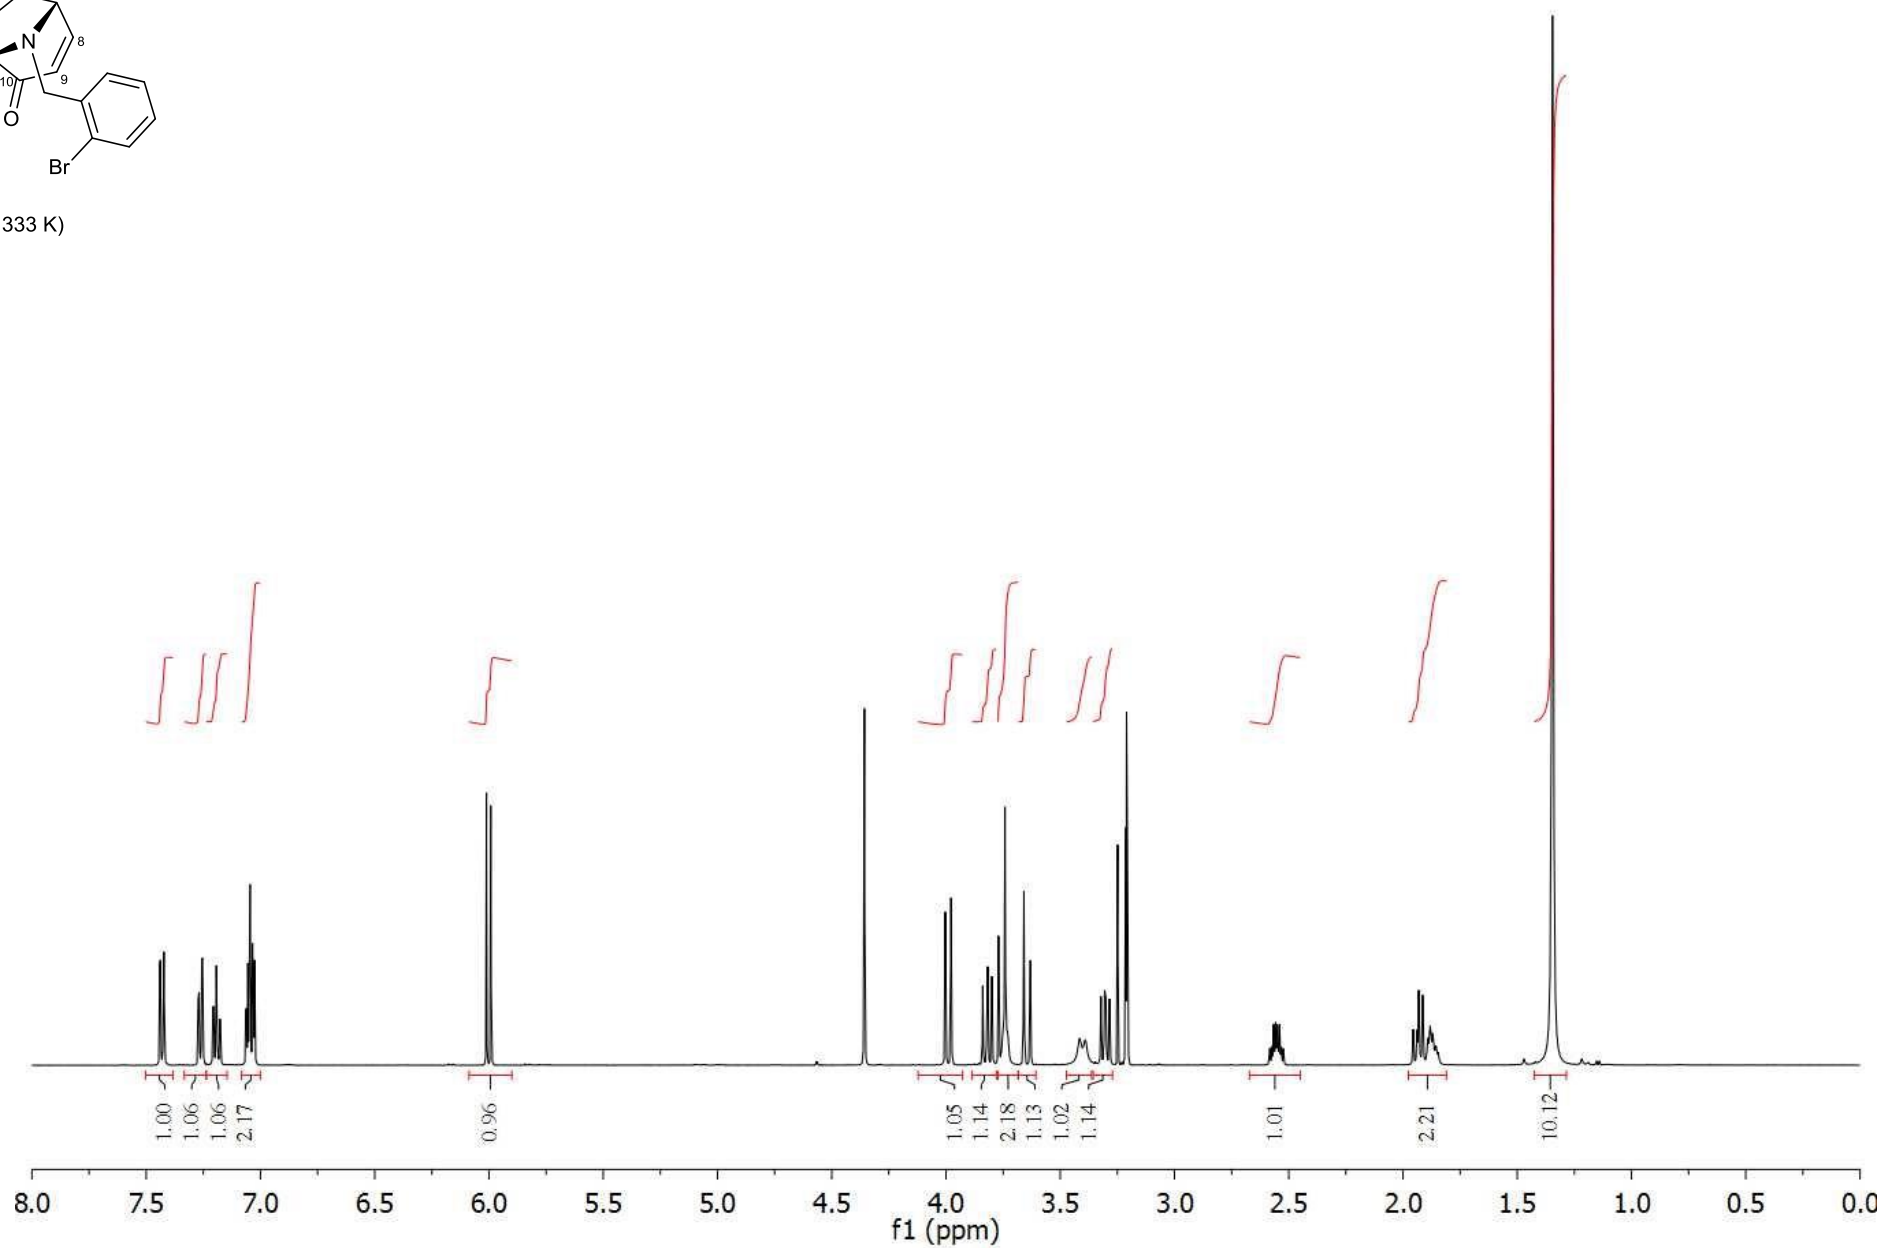



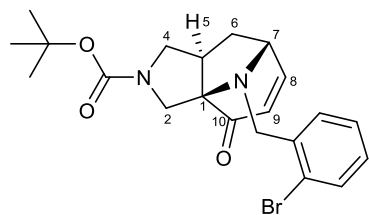

**2e**  
(CD<sub>3</sub>OD @ 333 K)

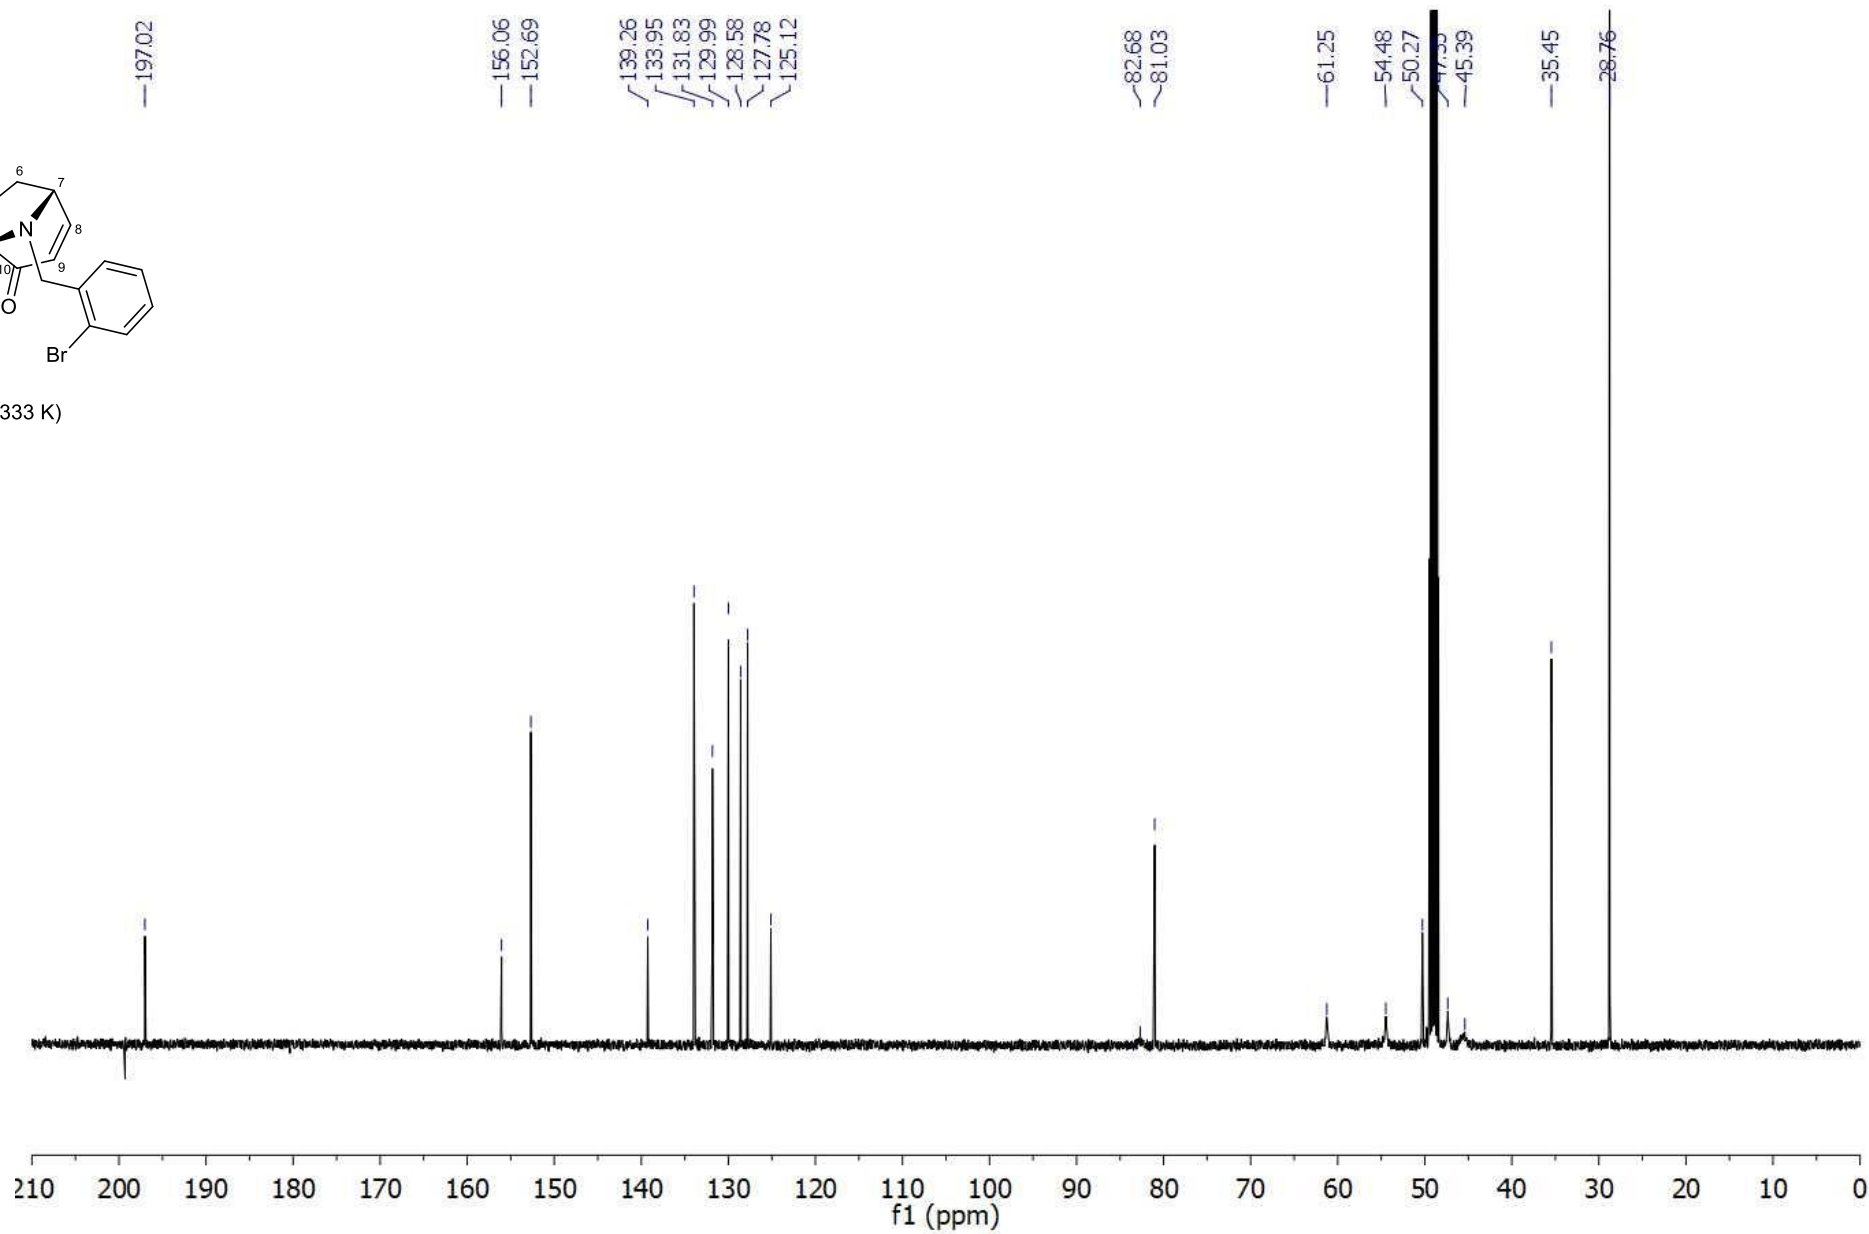

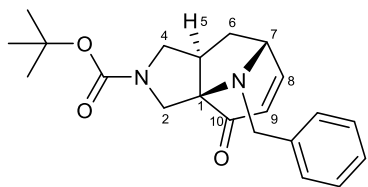

2f

(CD<sub>3</sub>OD @ 333 K)

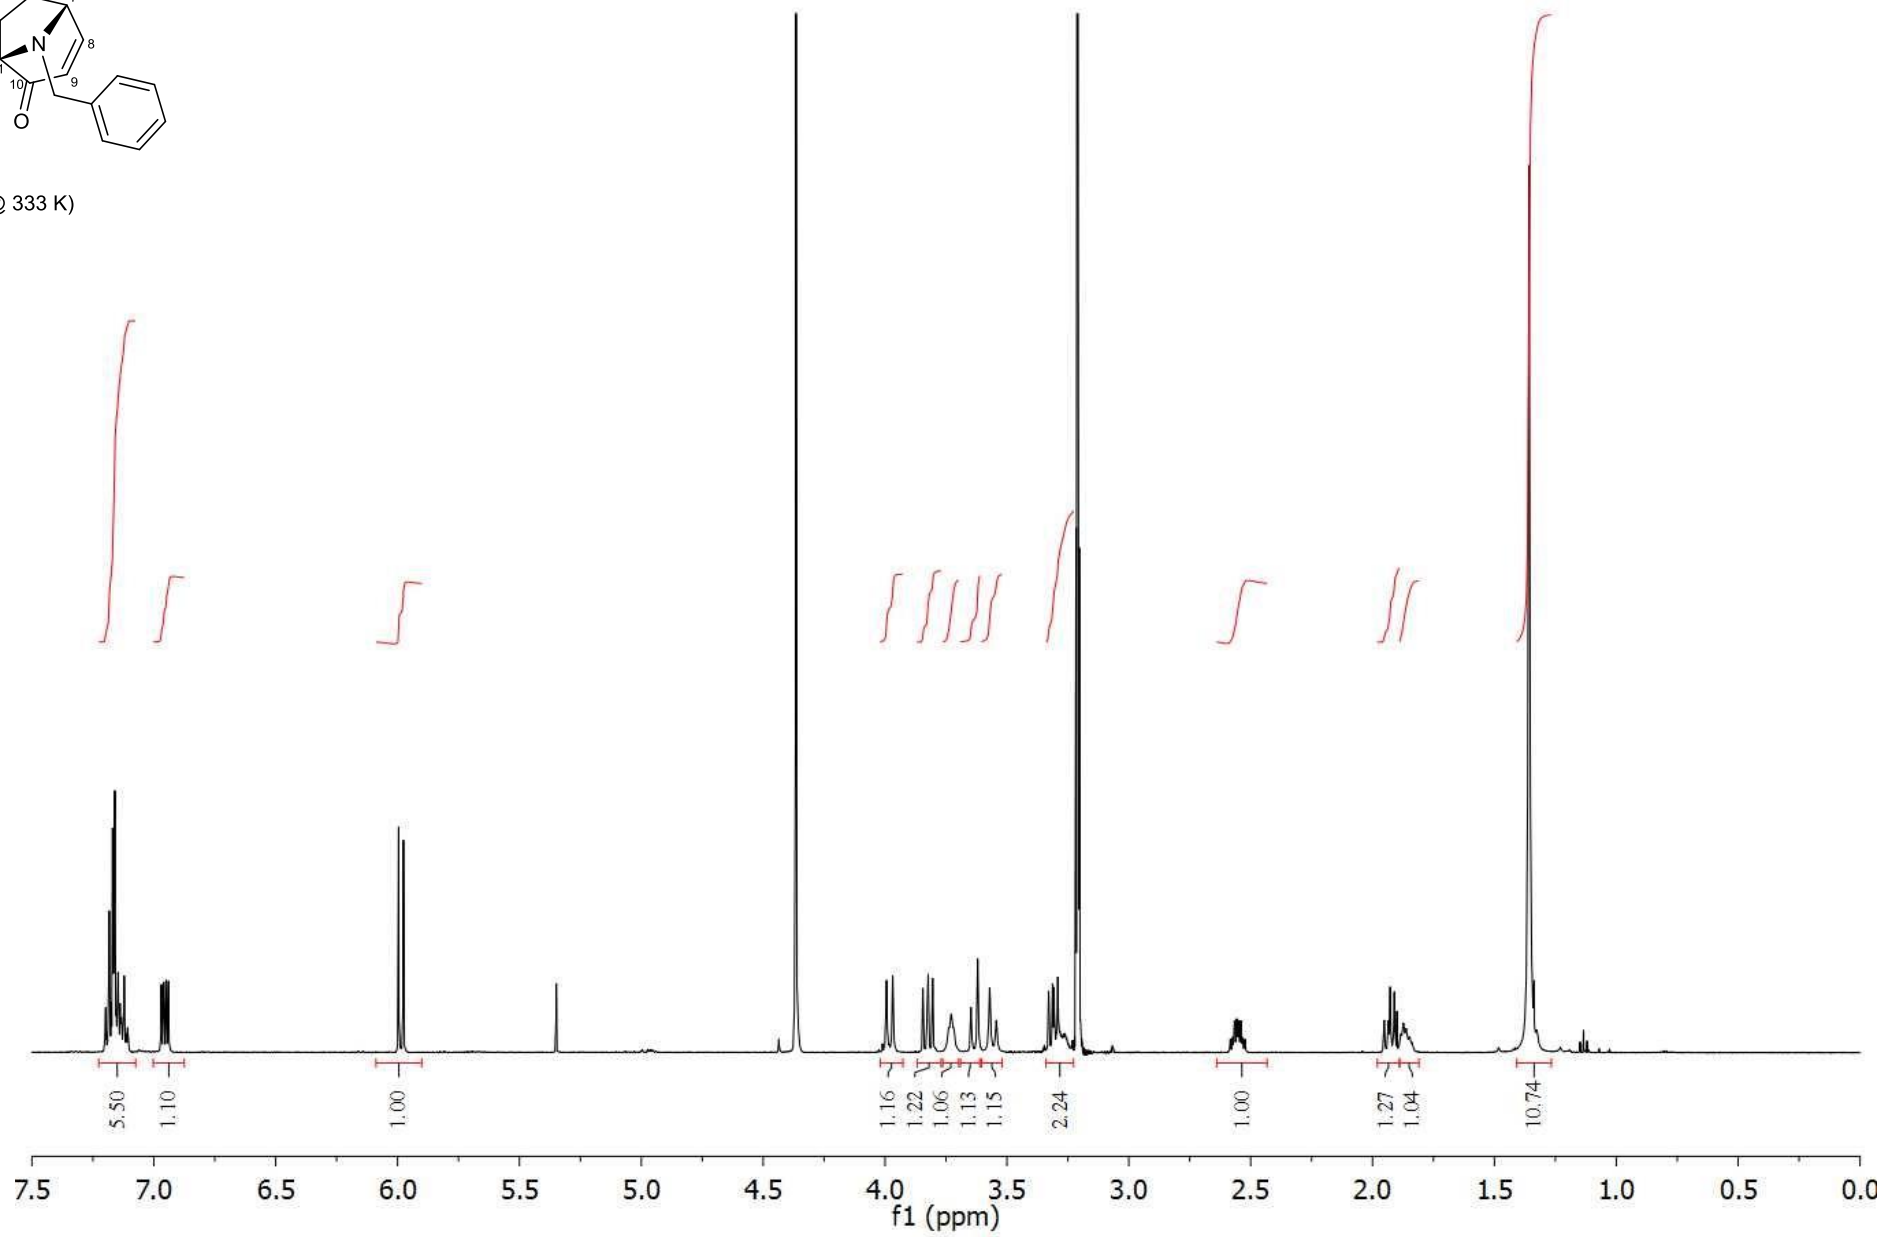

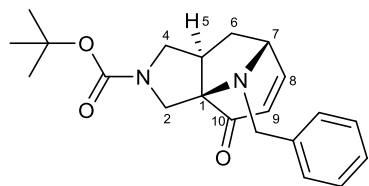

**2f**

(CD<sub>3</sub>OD @ 333 K)

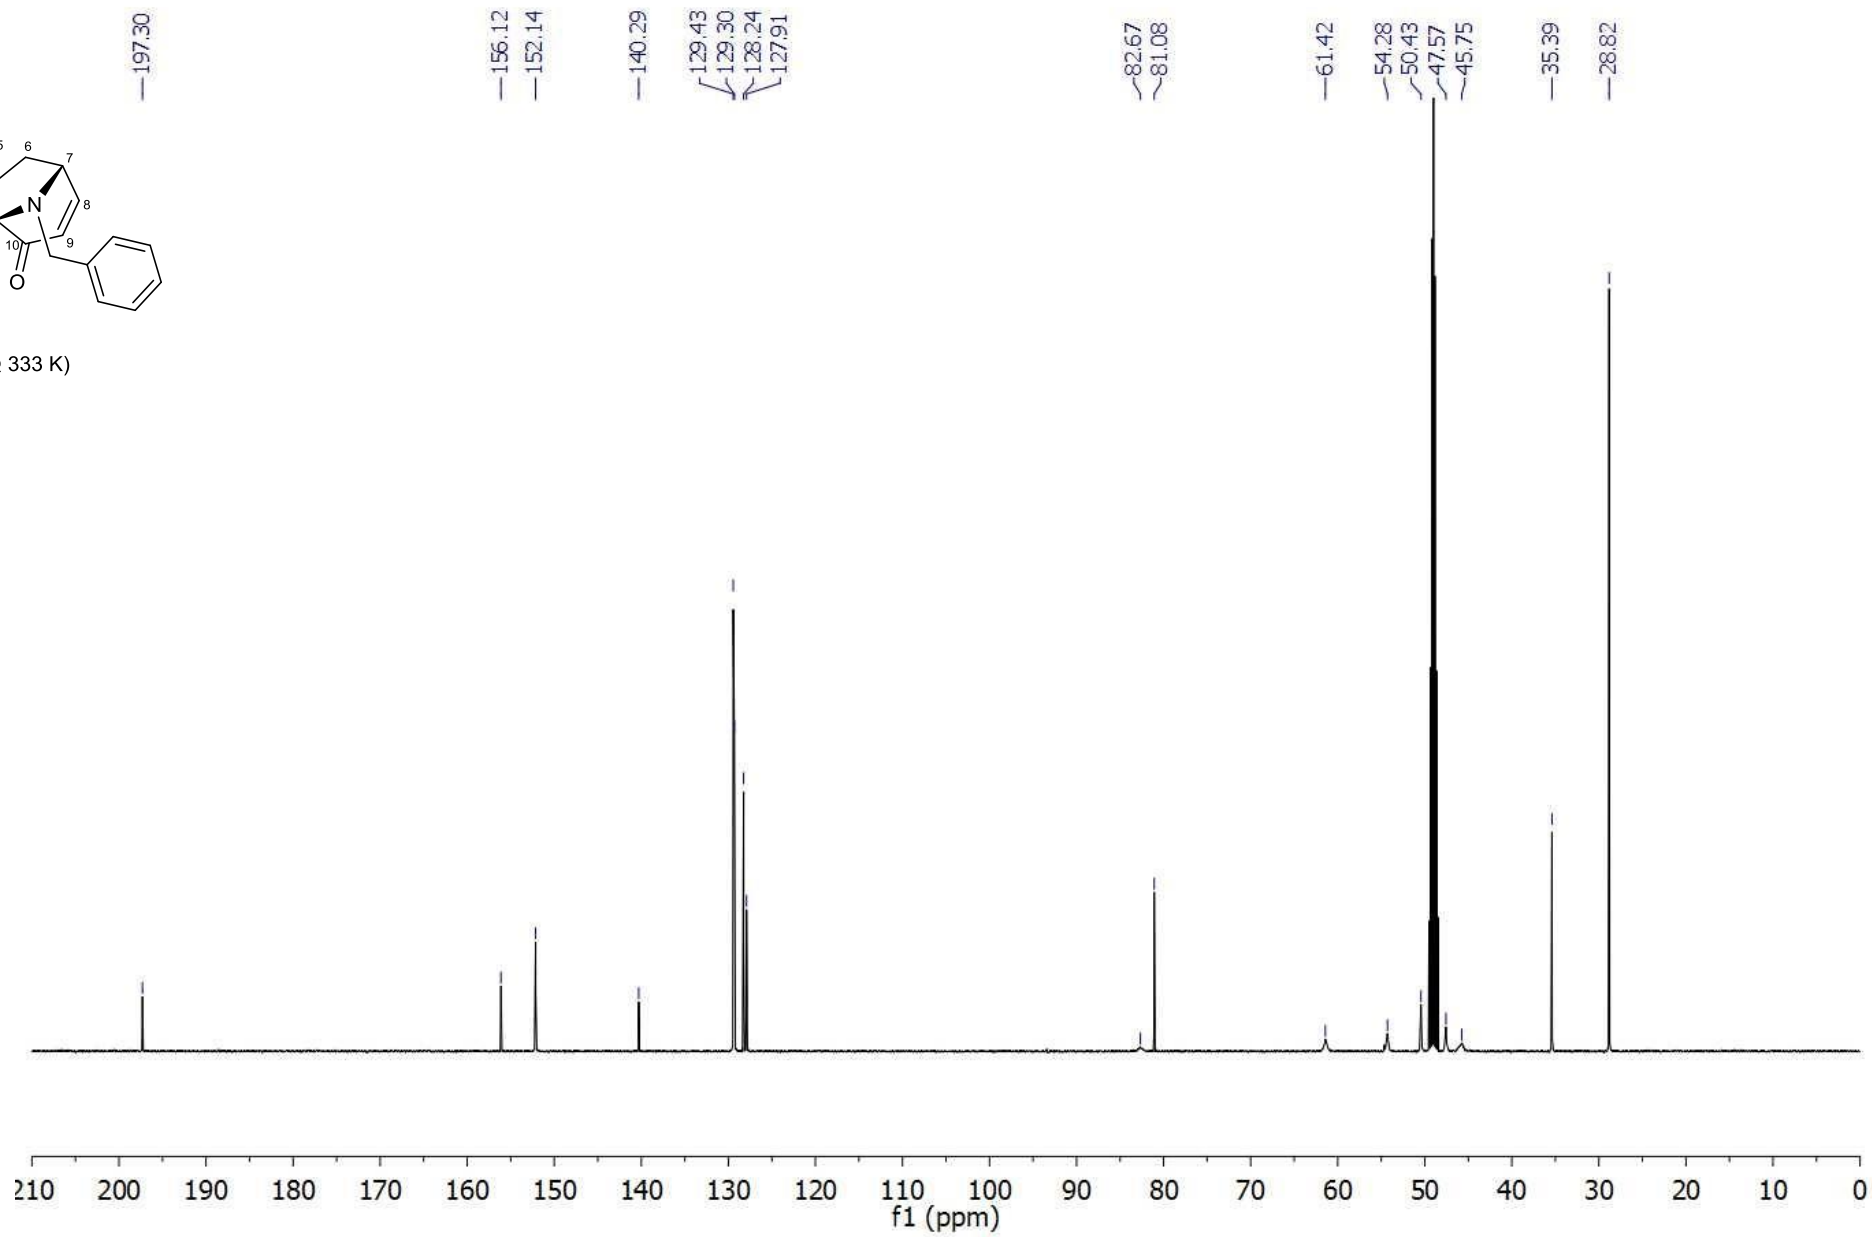

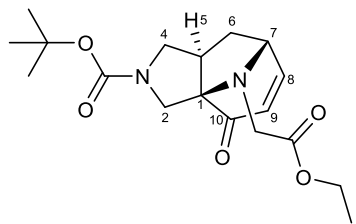

**2g**  
(CD<sub>3</sub>OD @ 333 K)

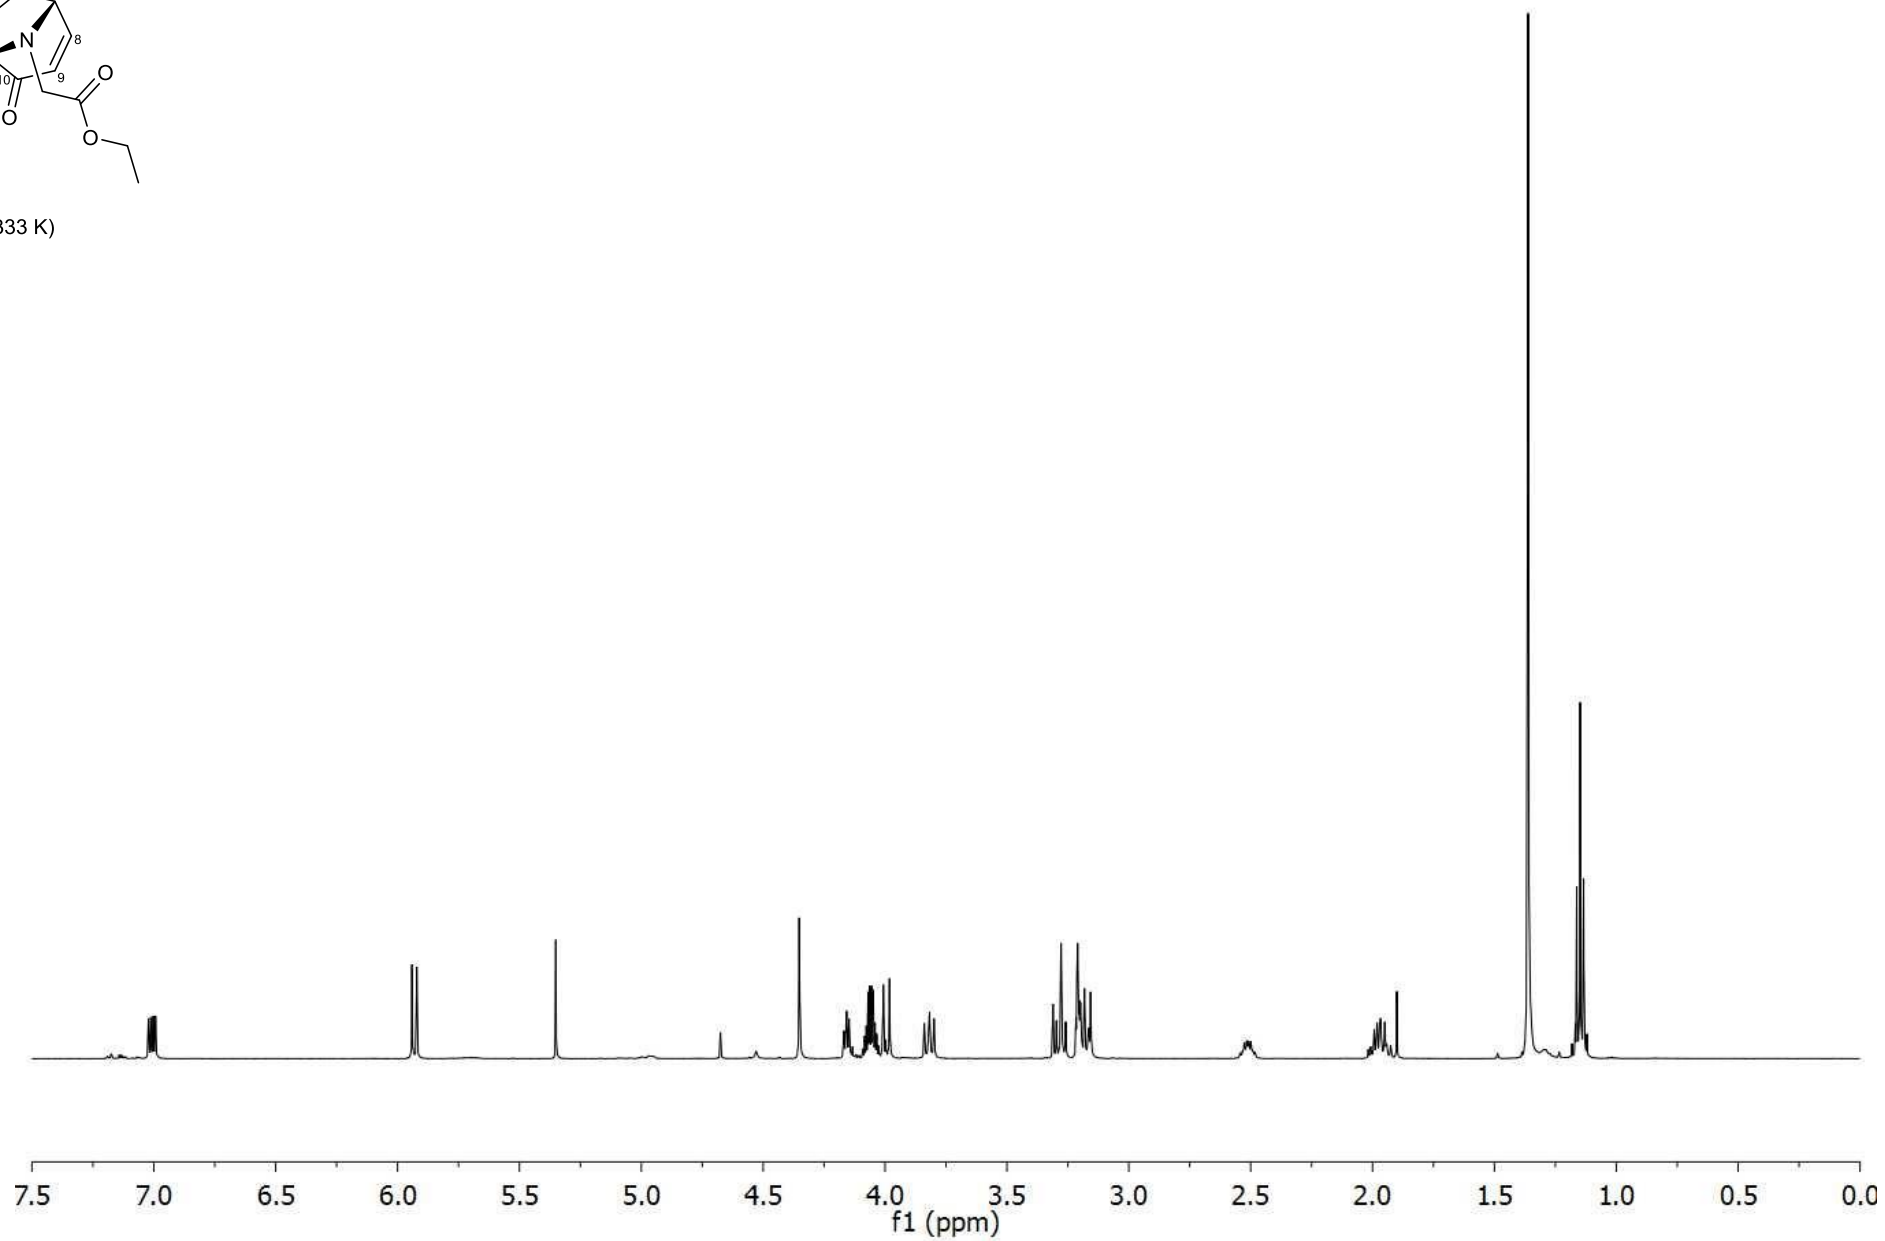

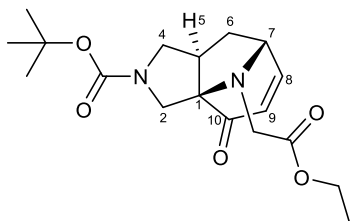

**2g**  
(CD<sub>3</sub>OD @ 333 K)

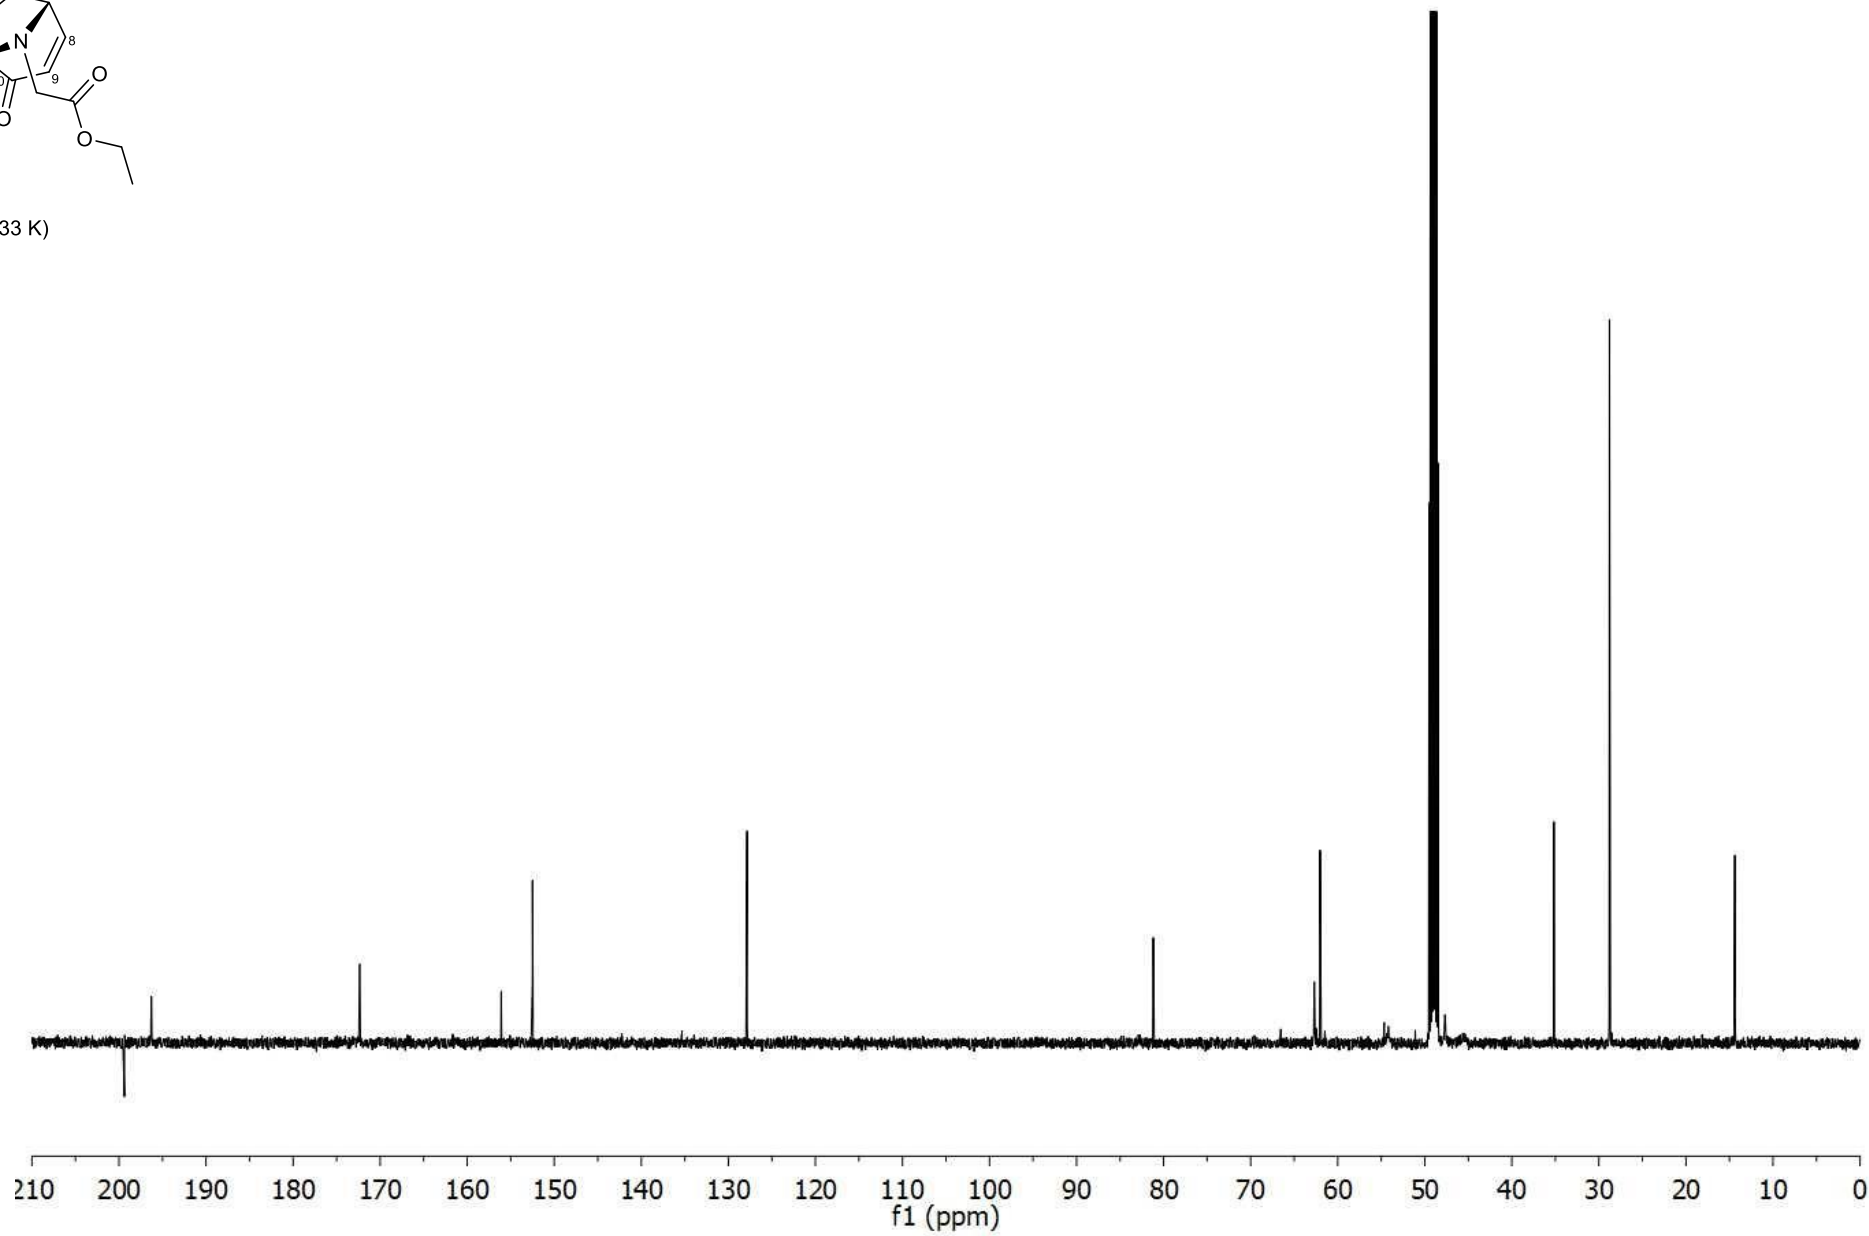

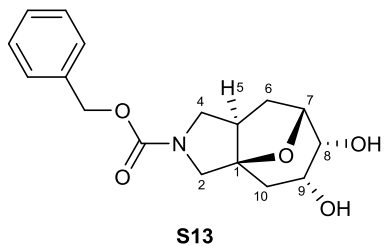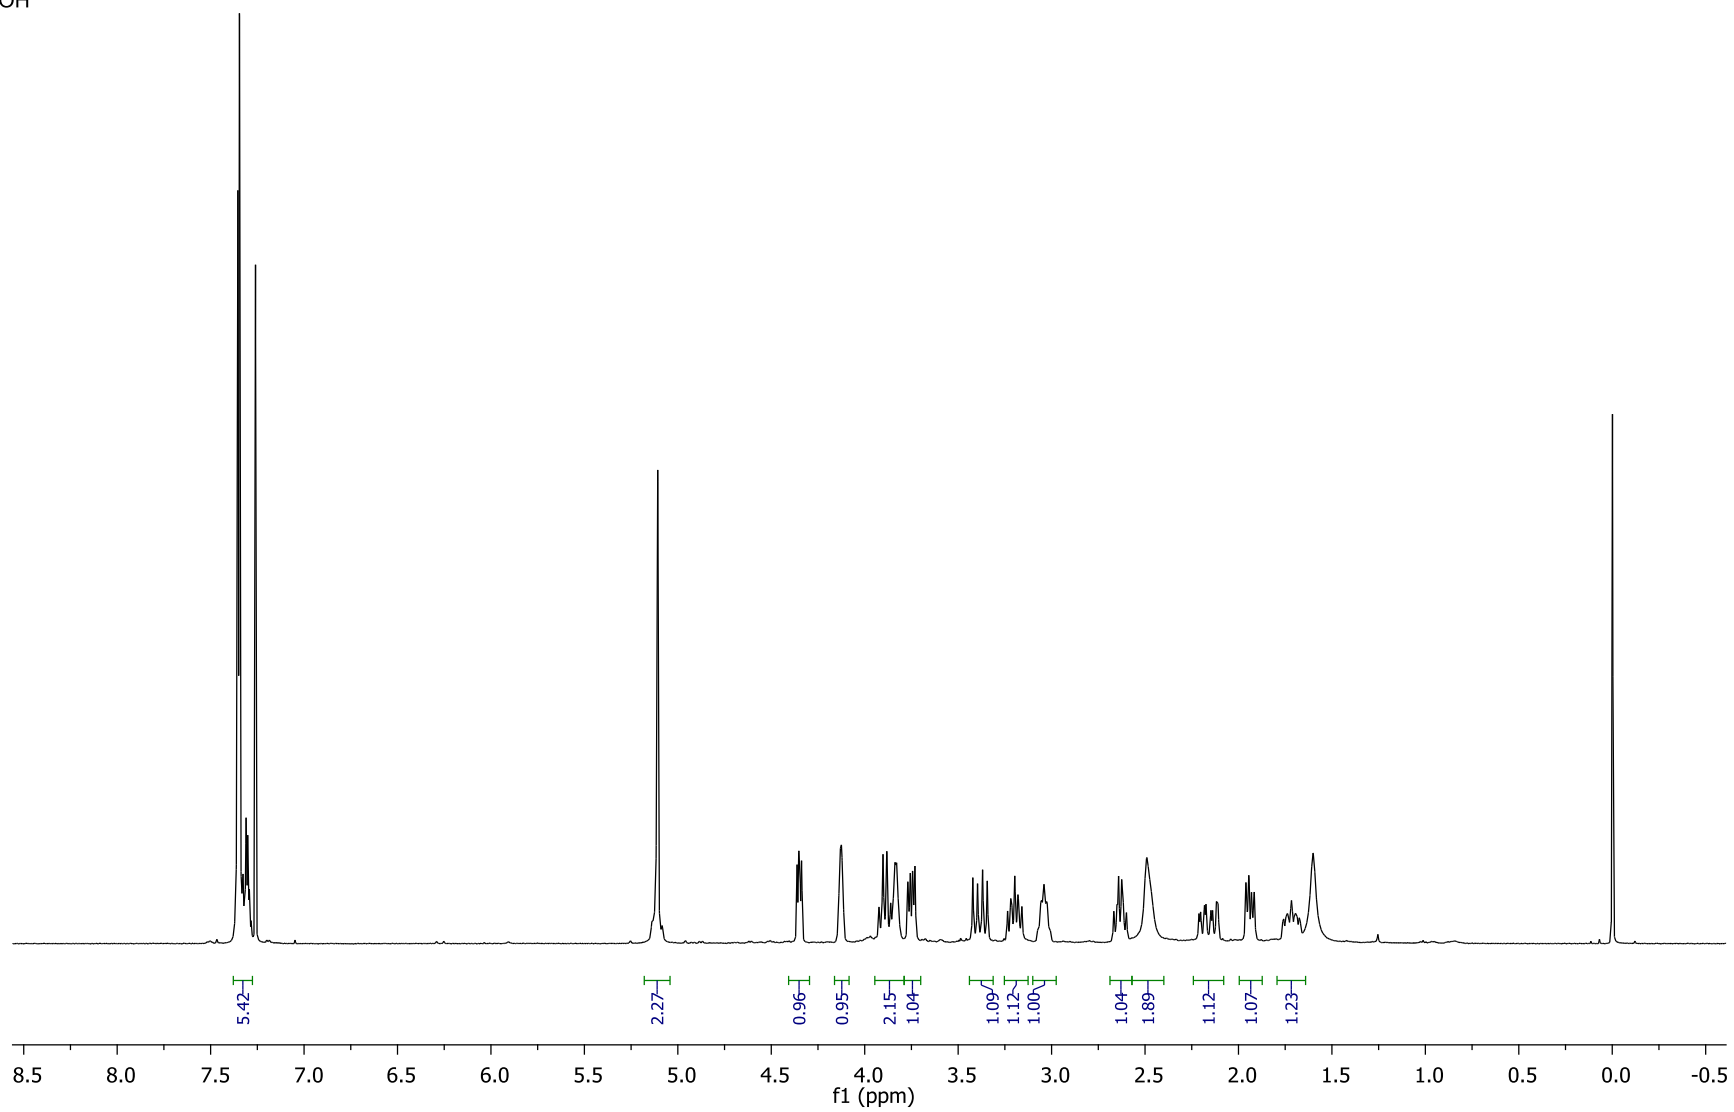

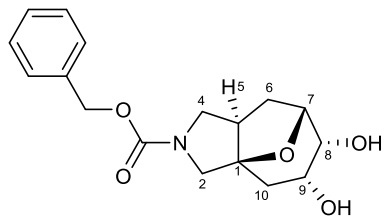

S13

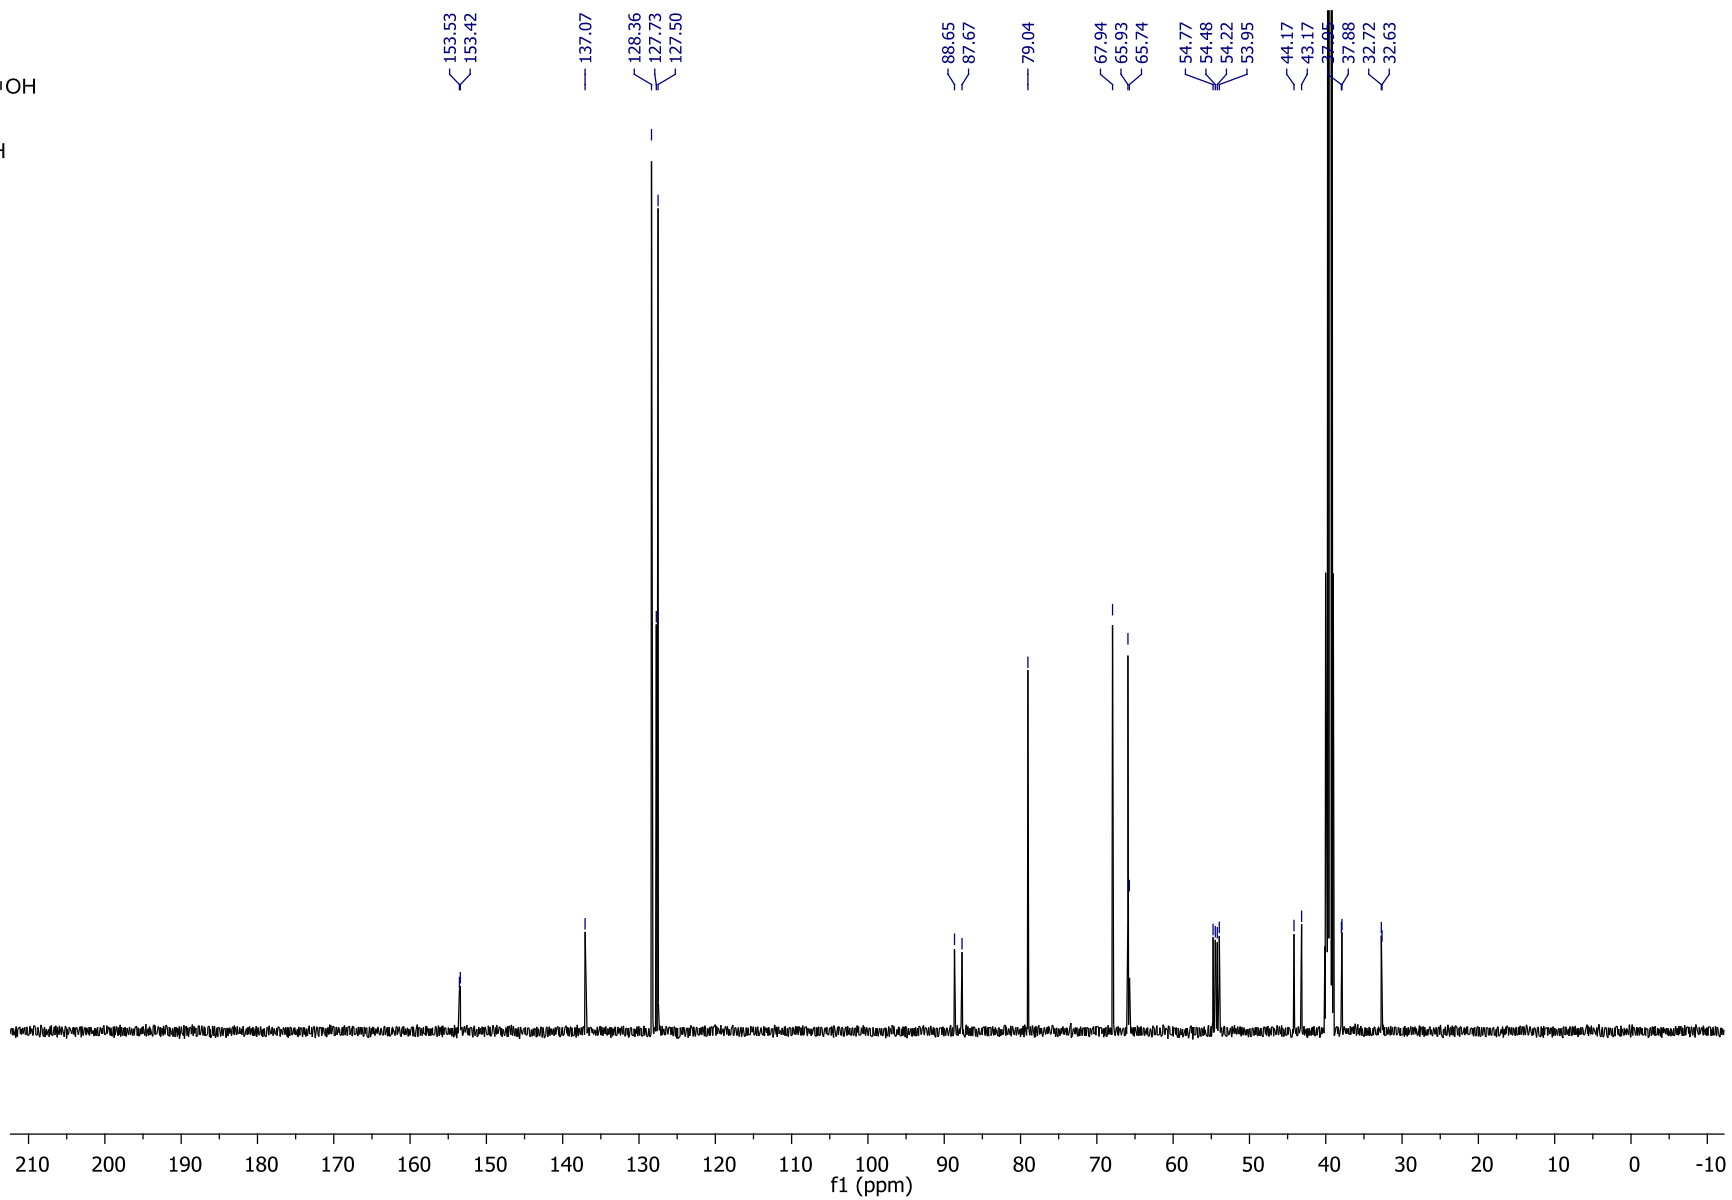

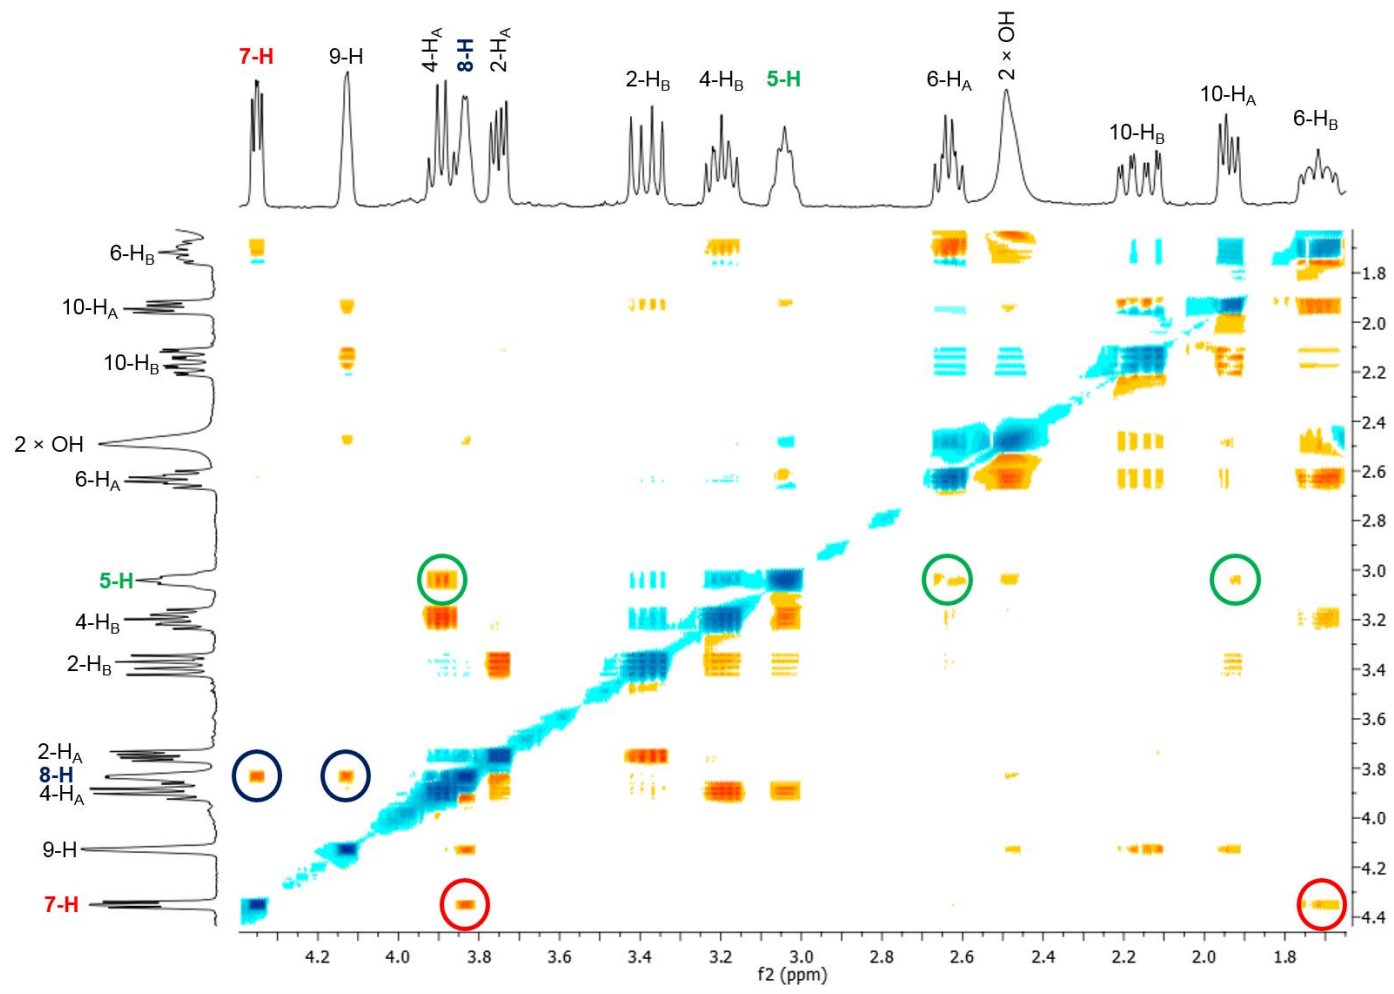

**S13 NOESY correlations:**

**5-H:** OH; 4-H<sub>A</sub>; 6-H<sub>A</sub>; 10-H<sub>A</sub>

**7-H:** 6-H<sub>B</sub>; 8-H

**8-H:** OH; 7-H; 9-H

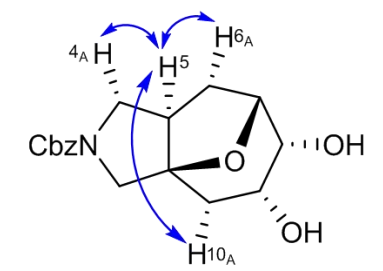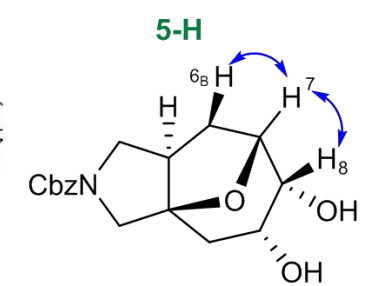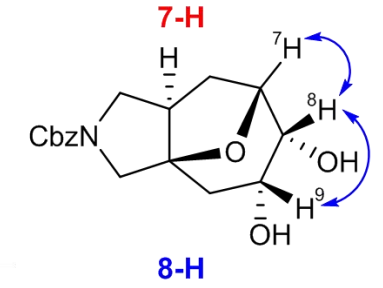



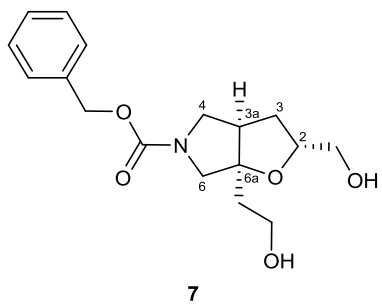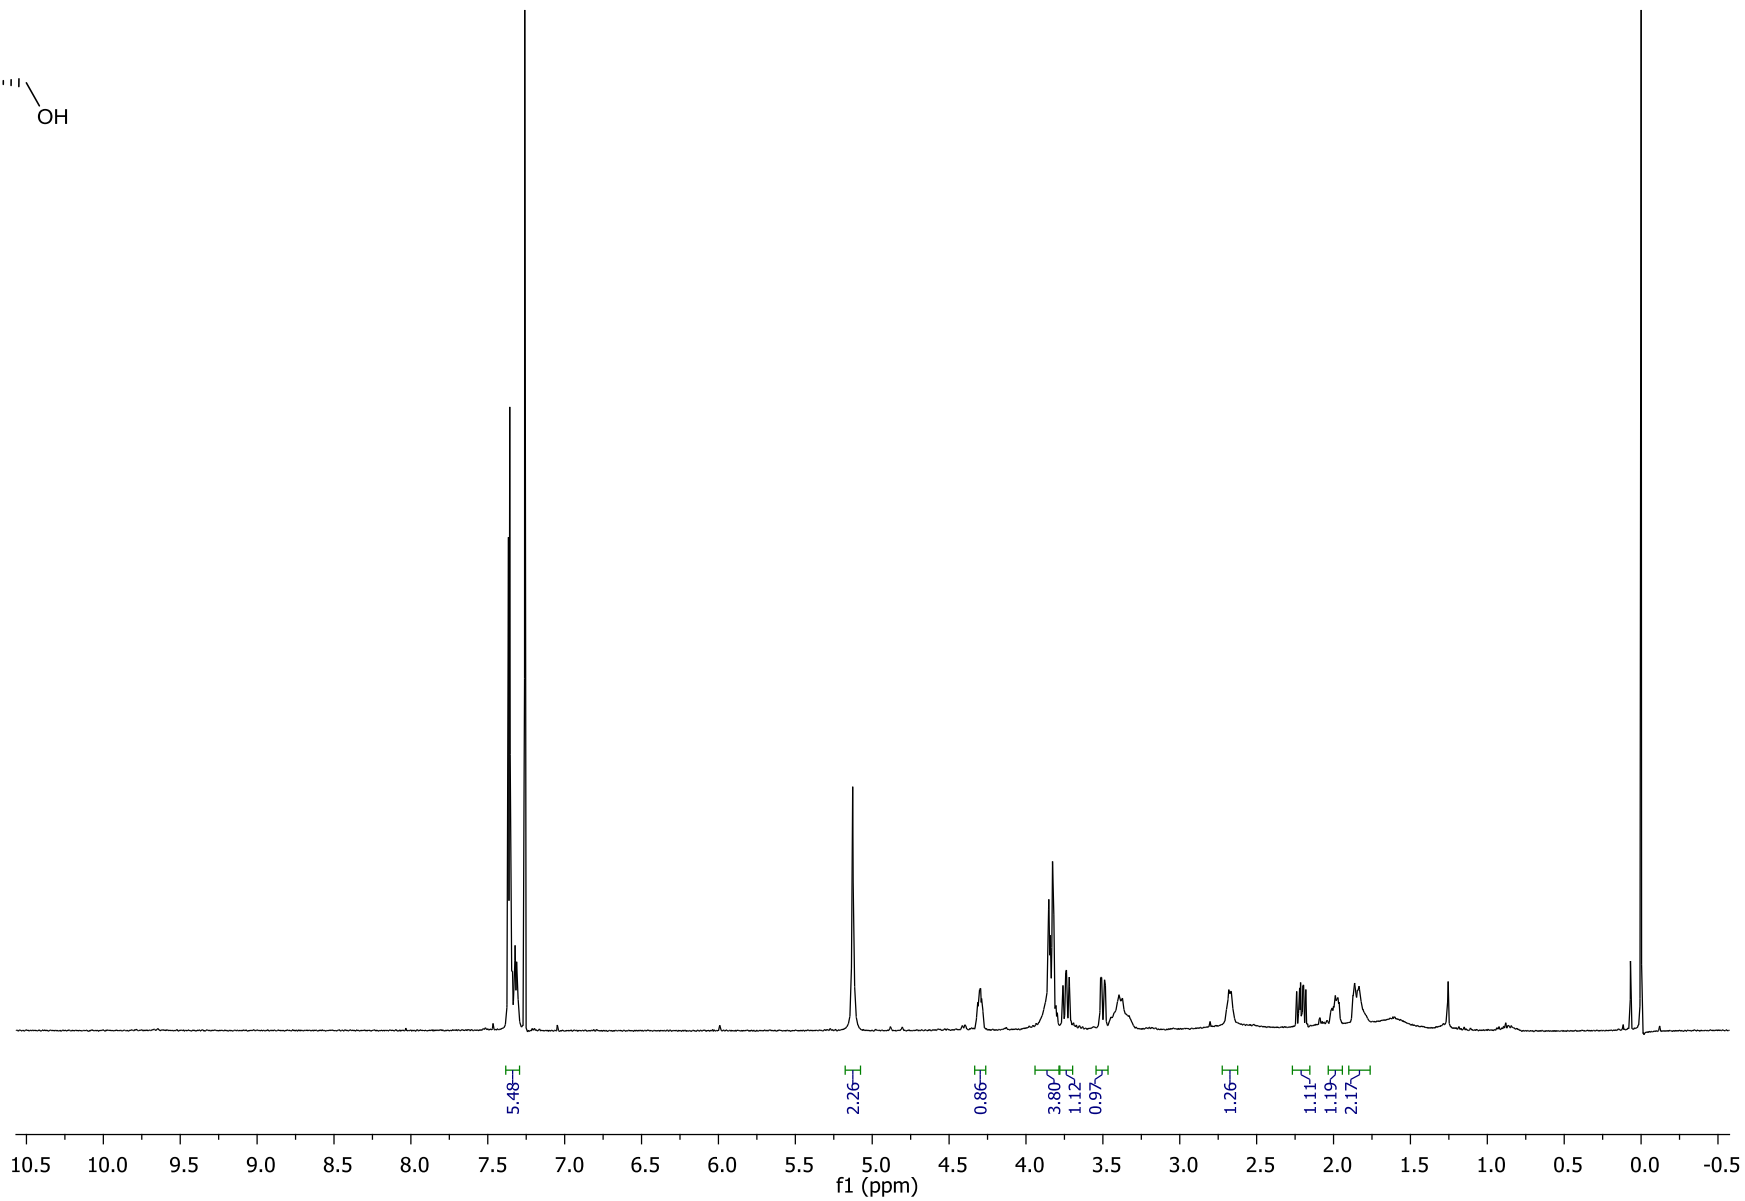

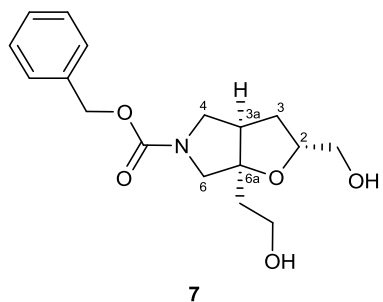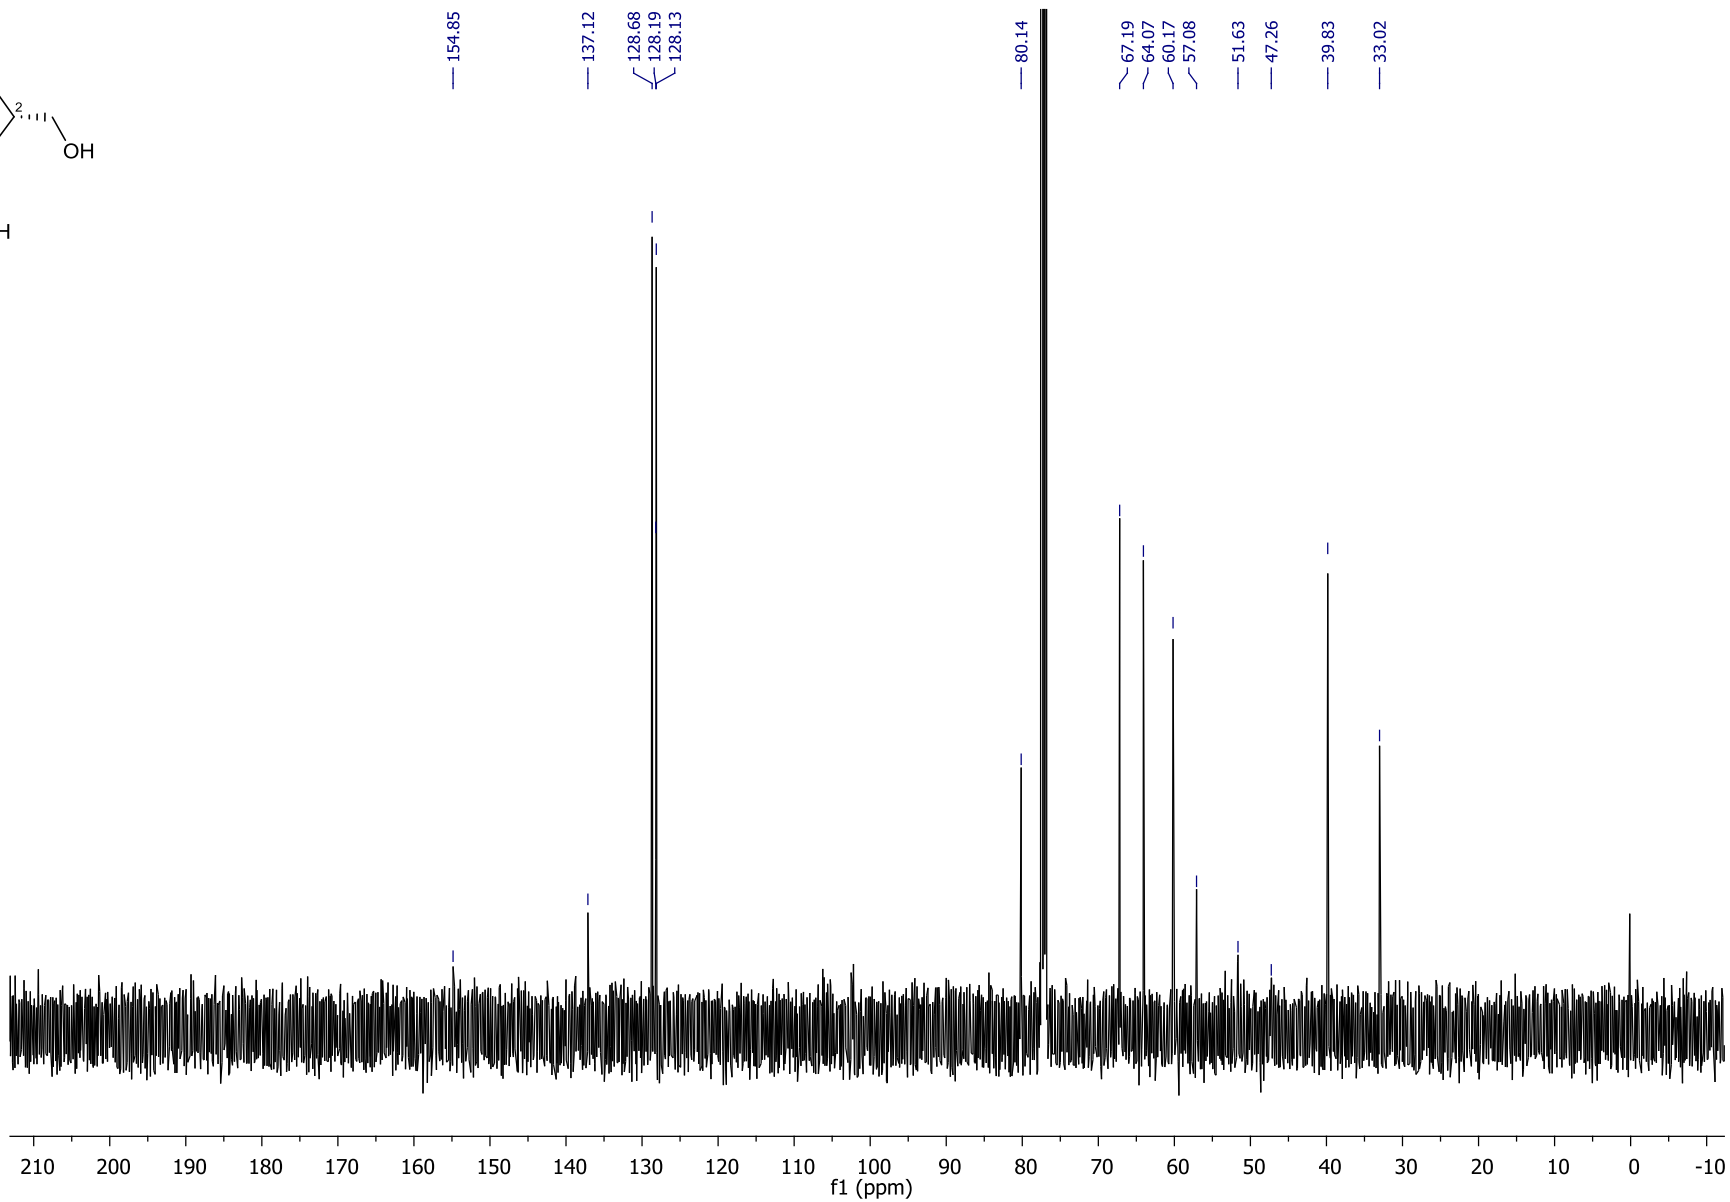

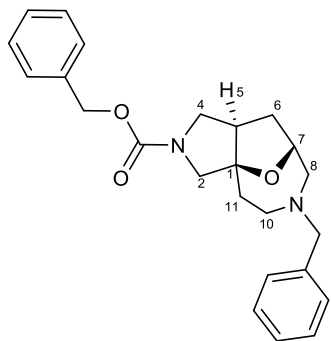

4

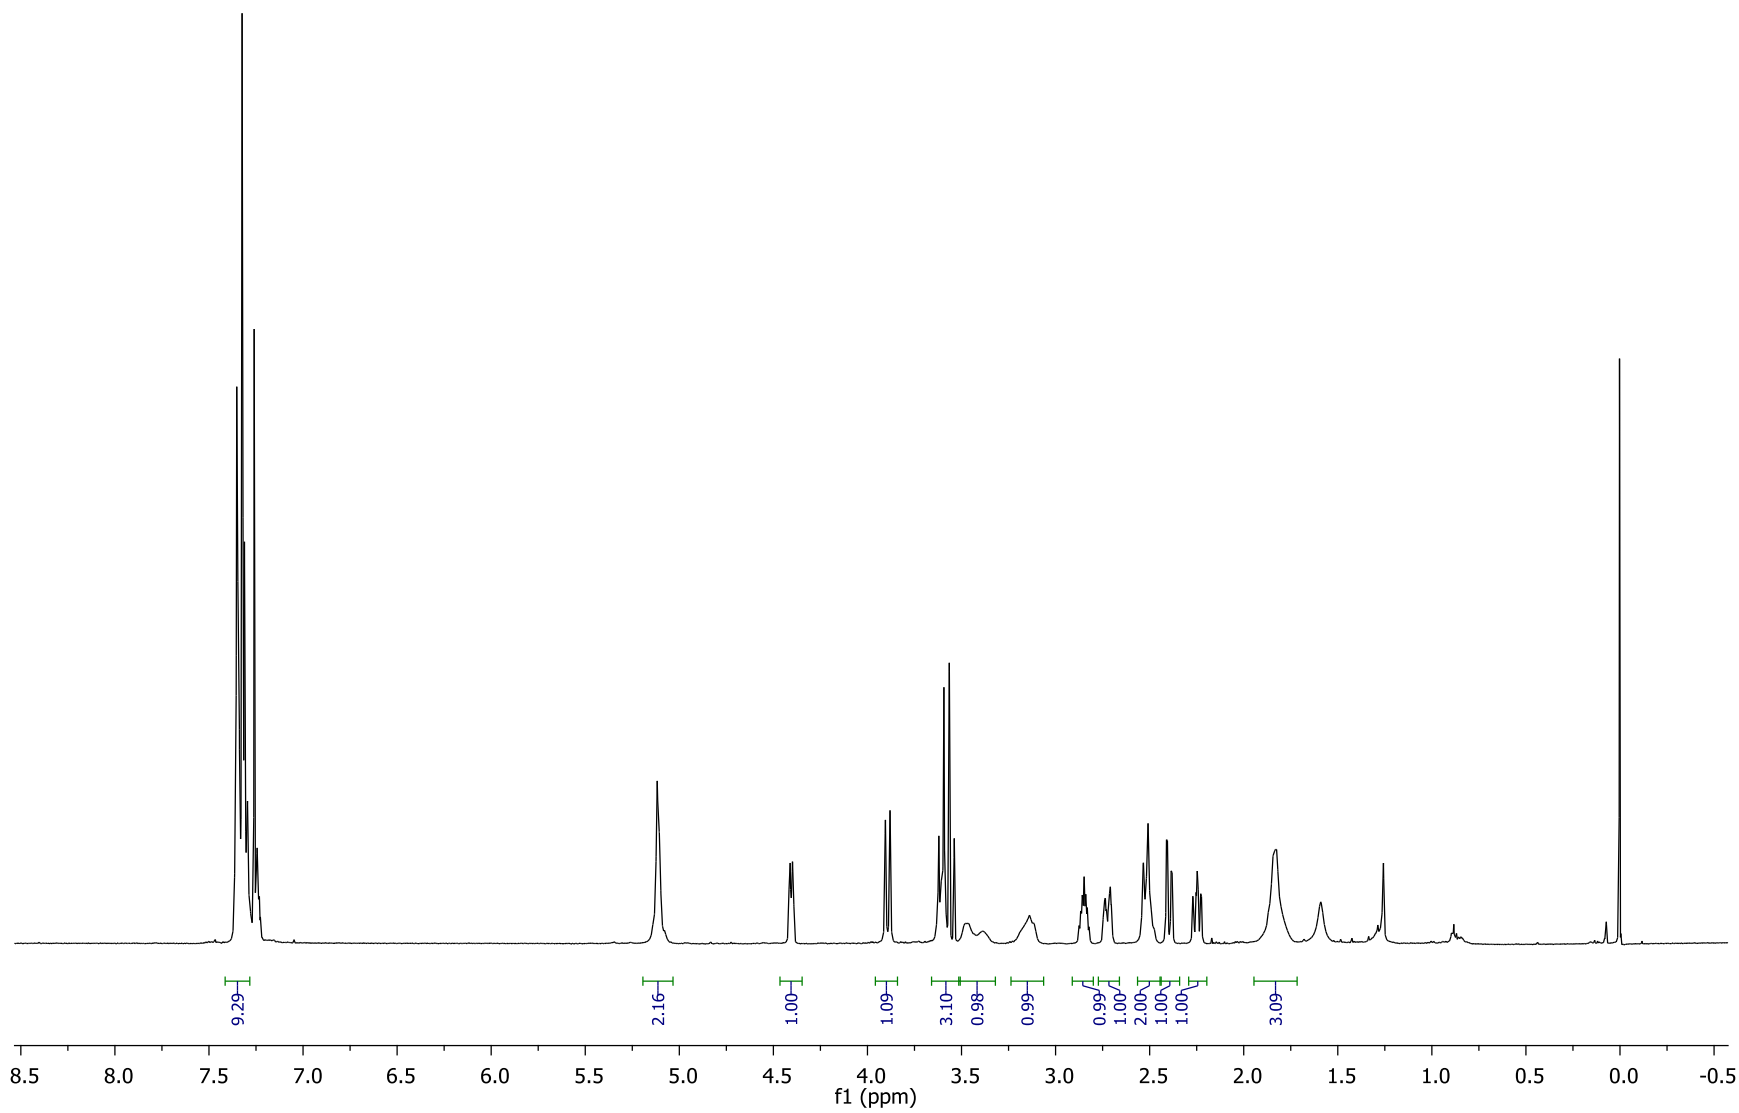

214

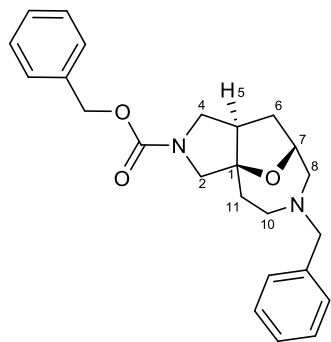

4

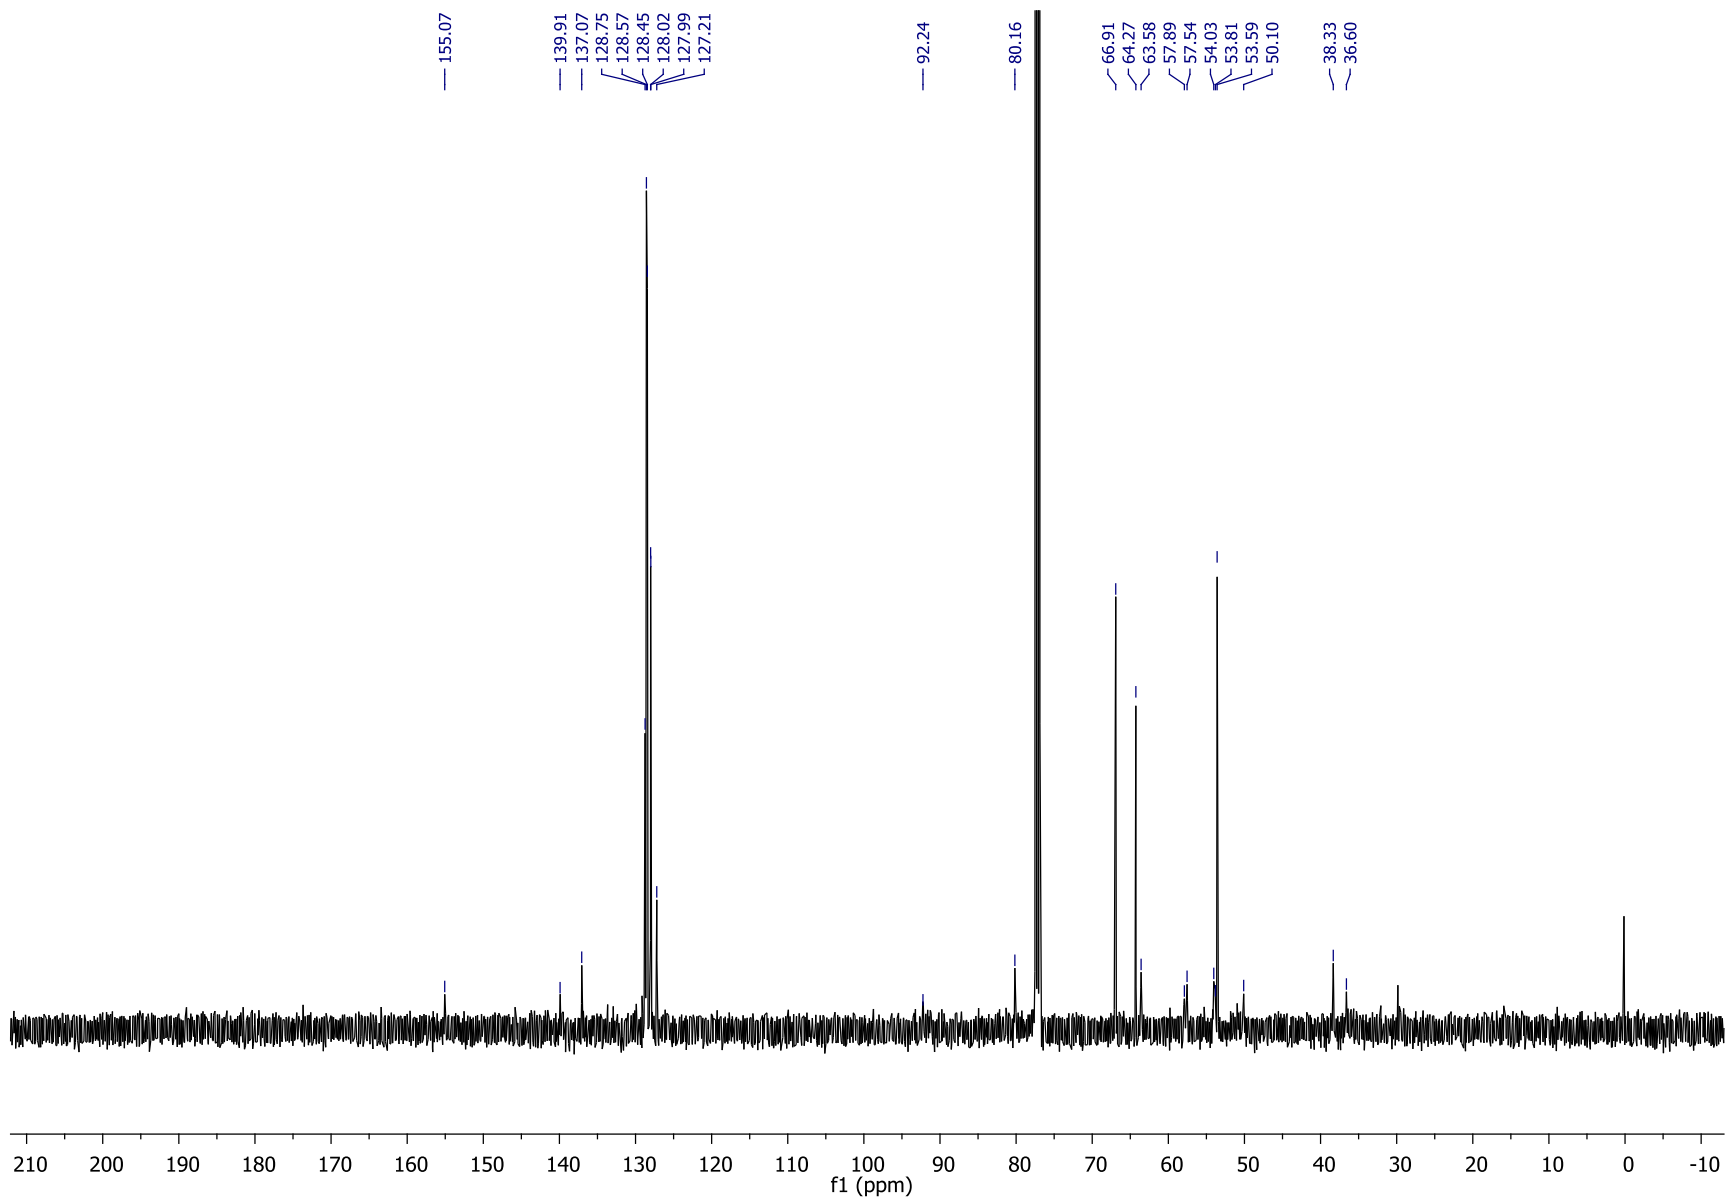

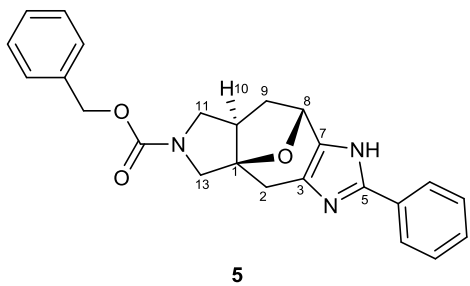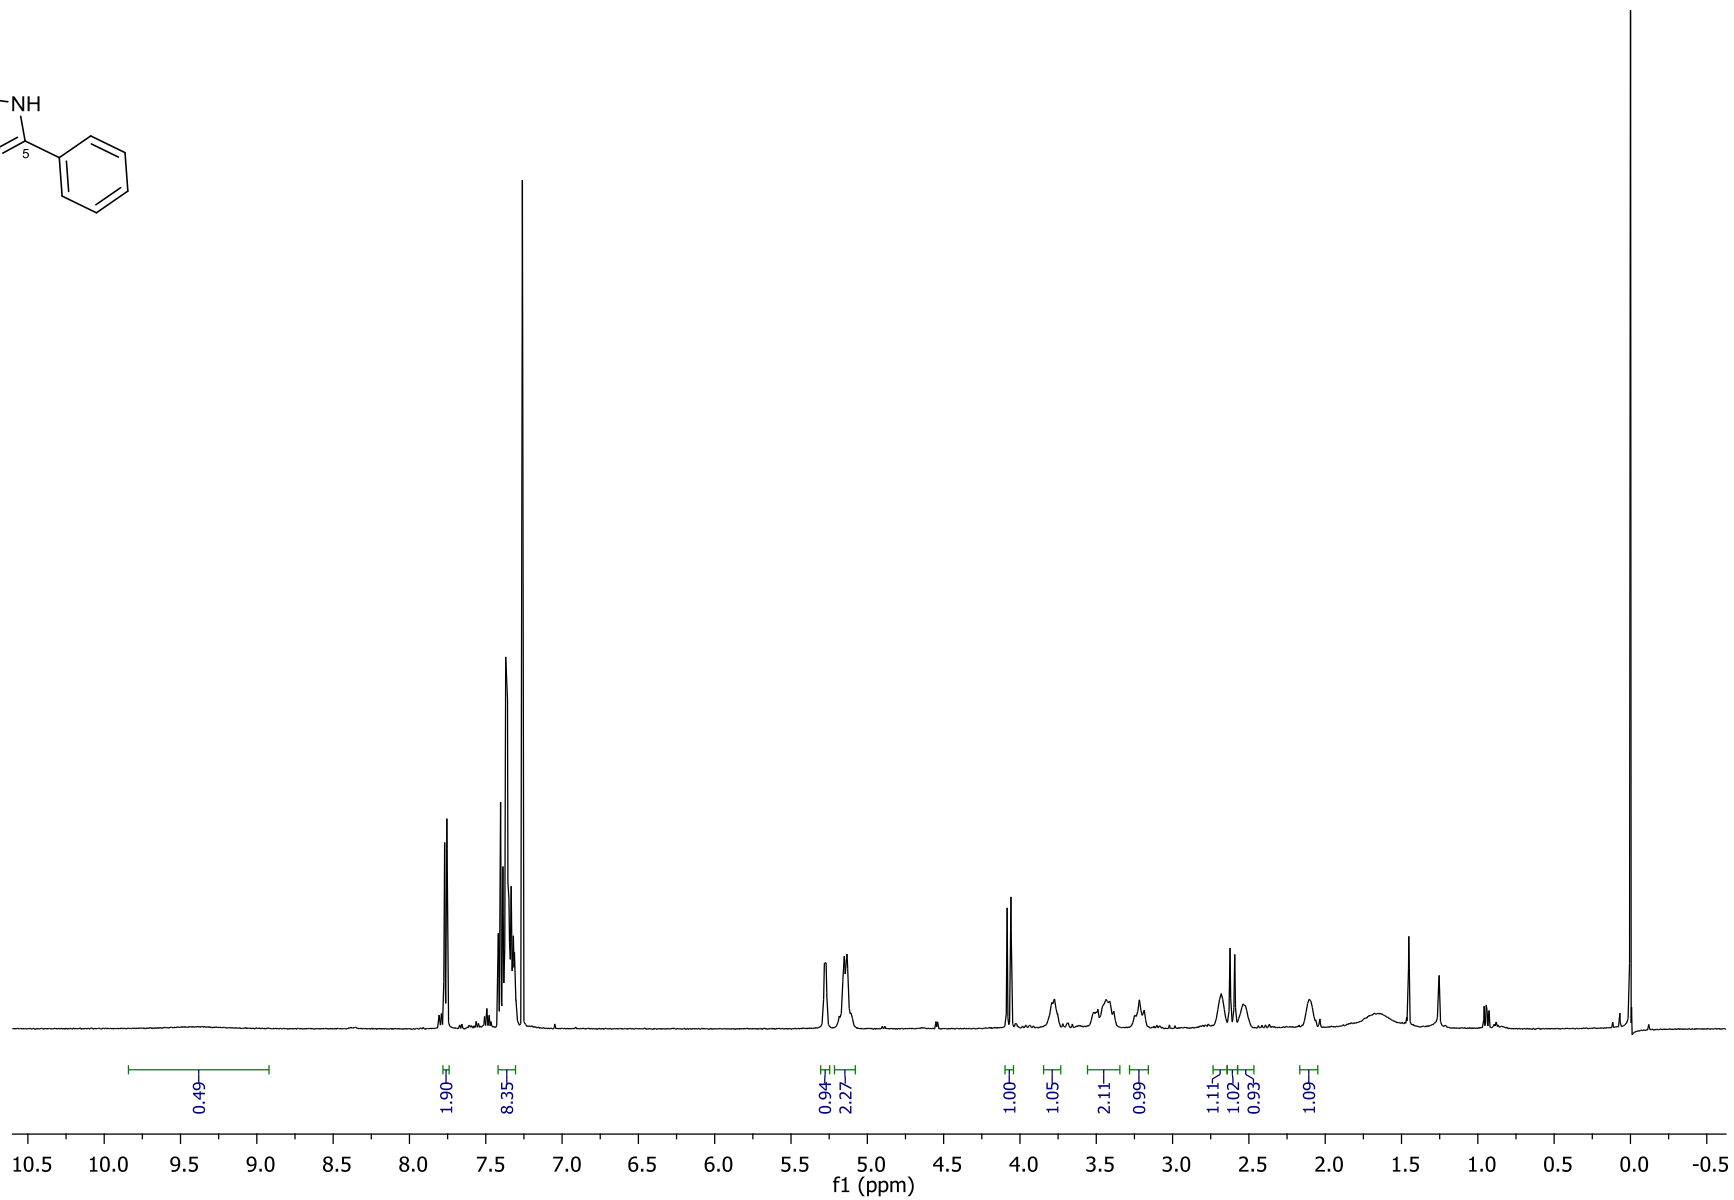

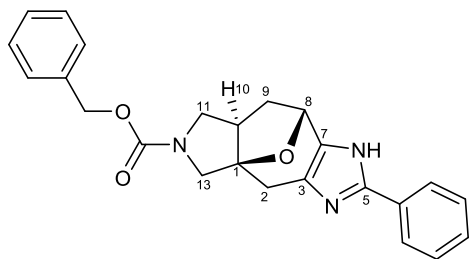

5

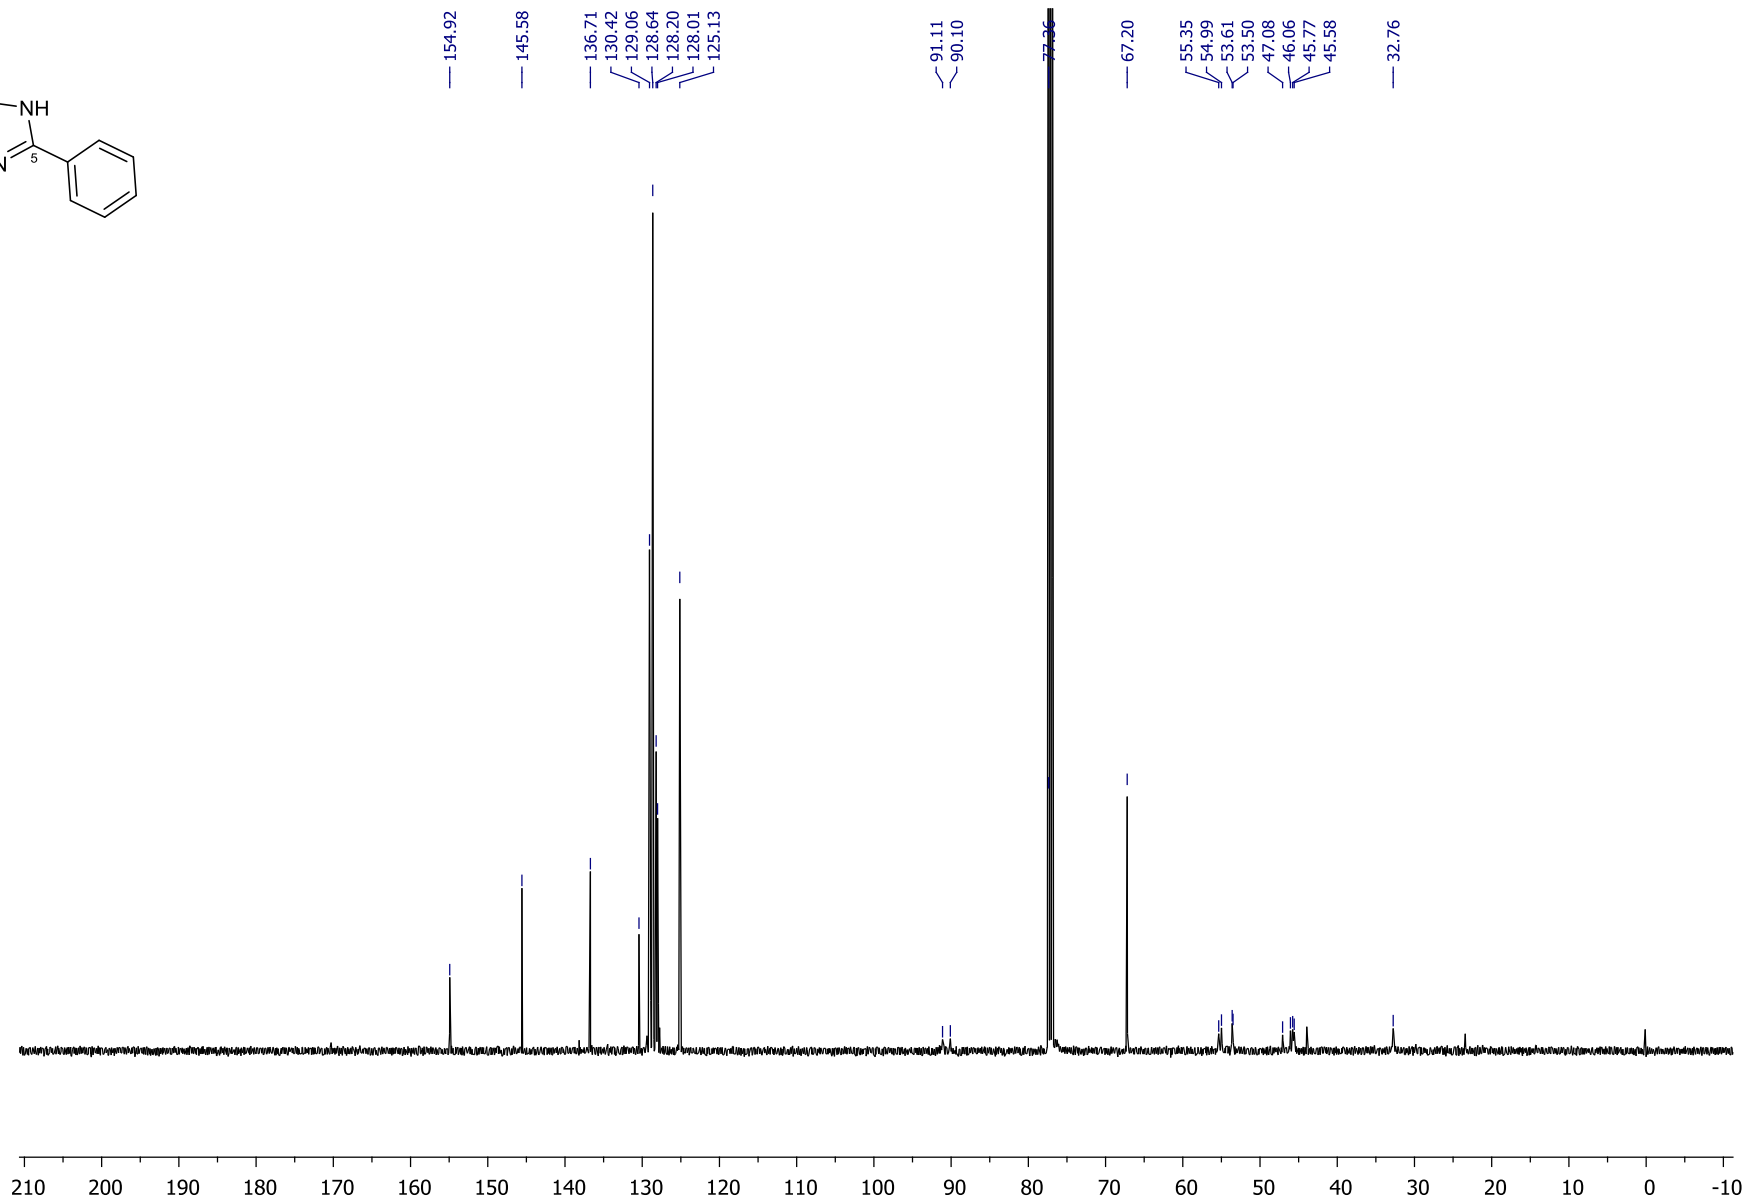

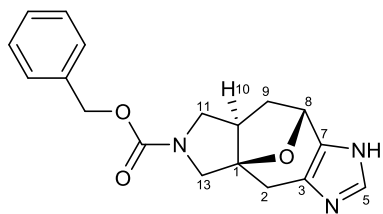

S16

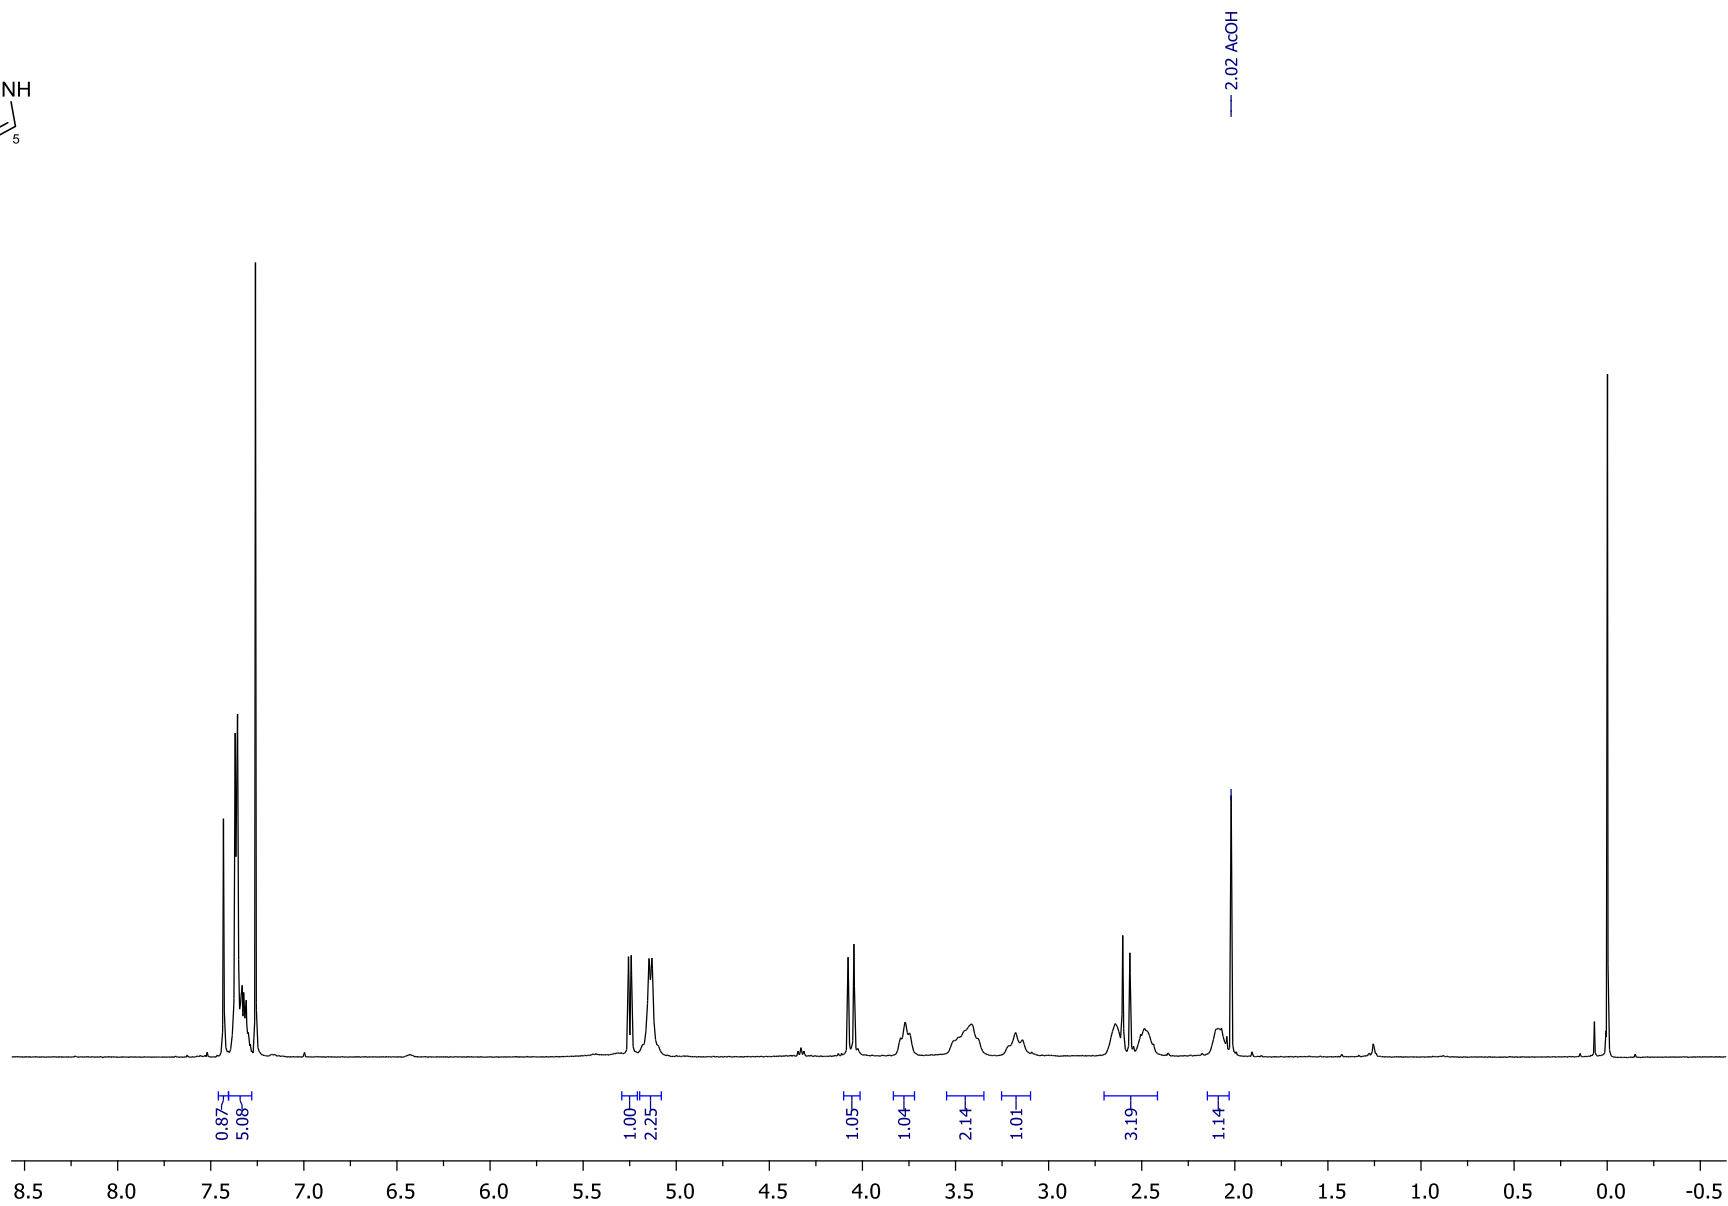

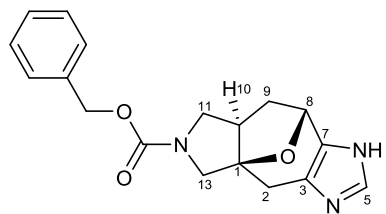

S16

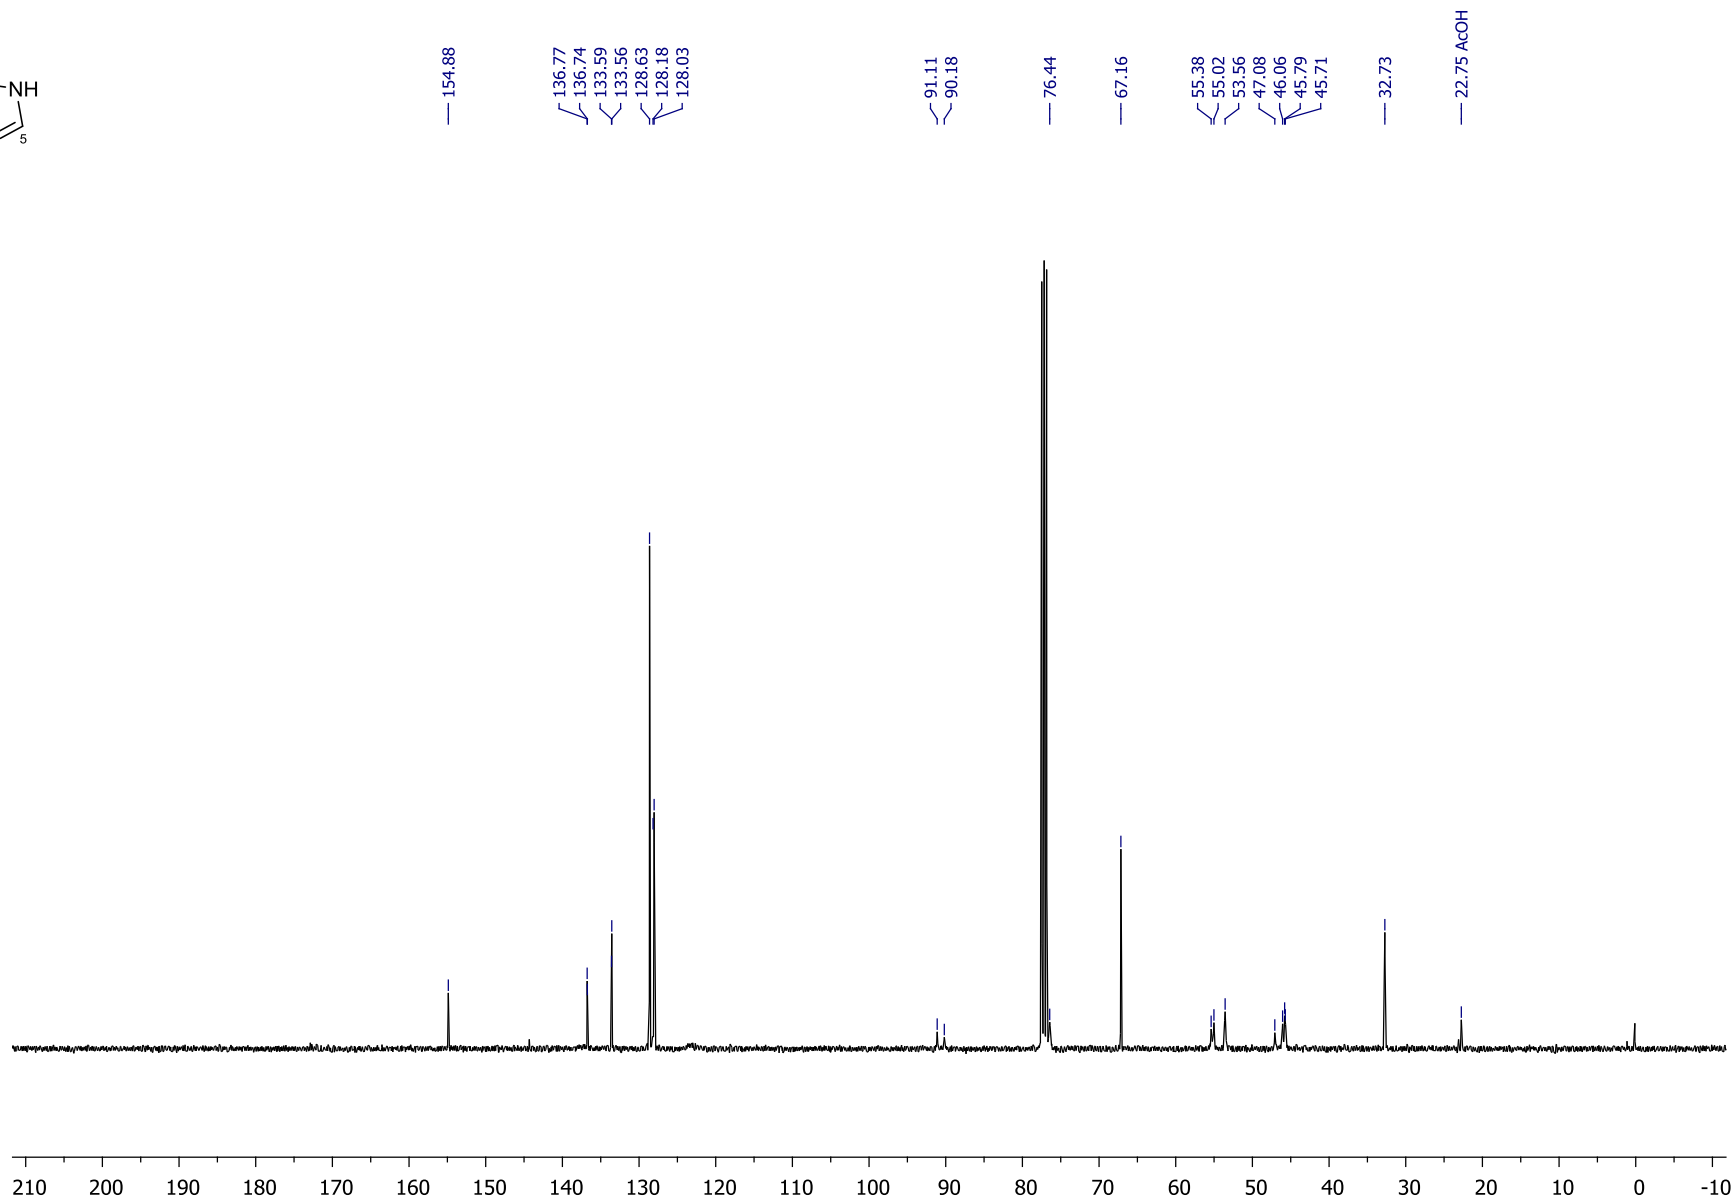



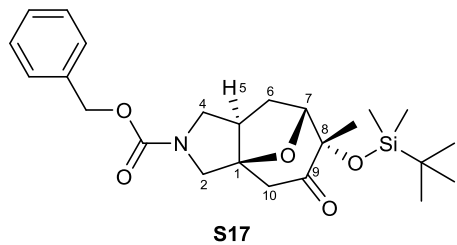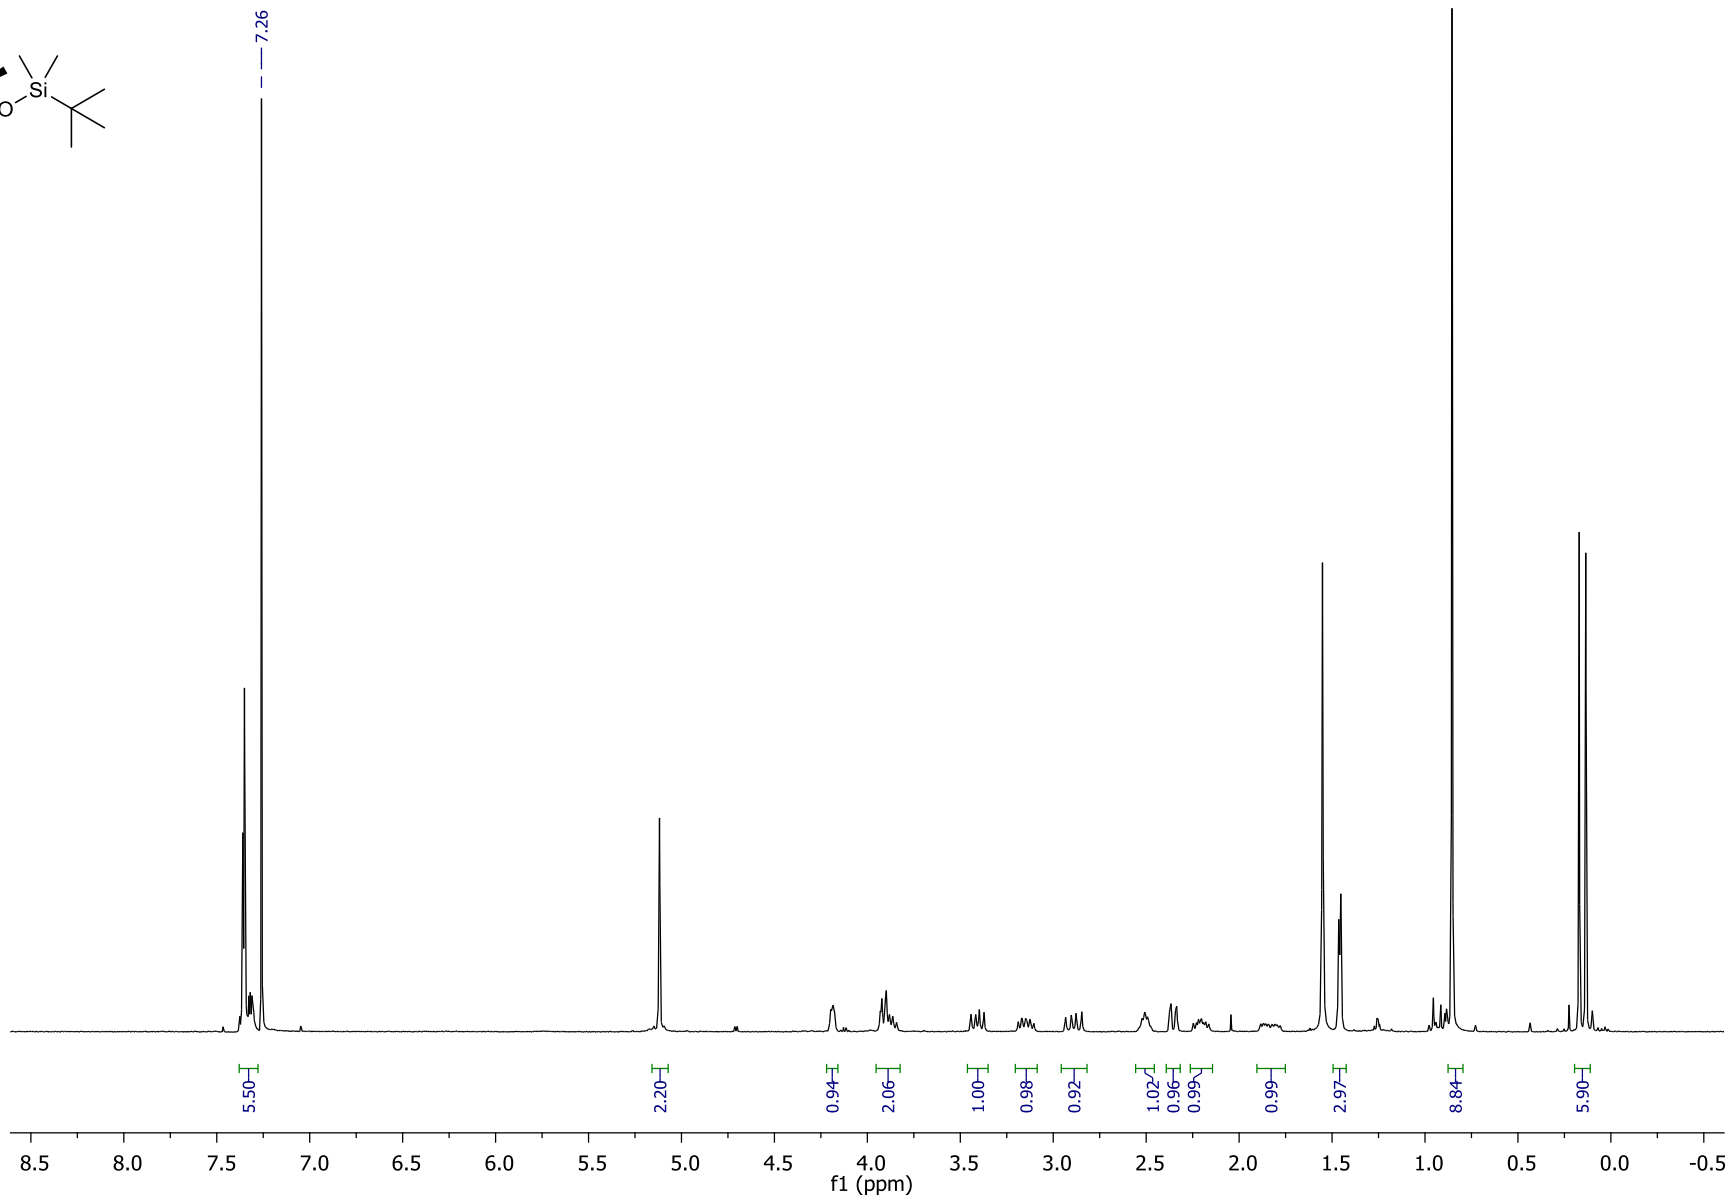

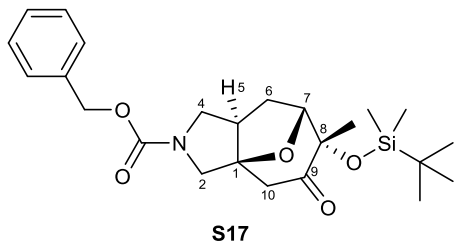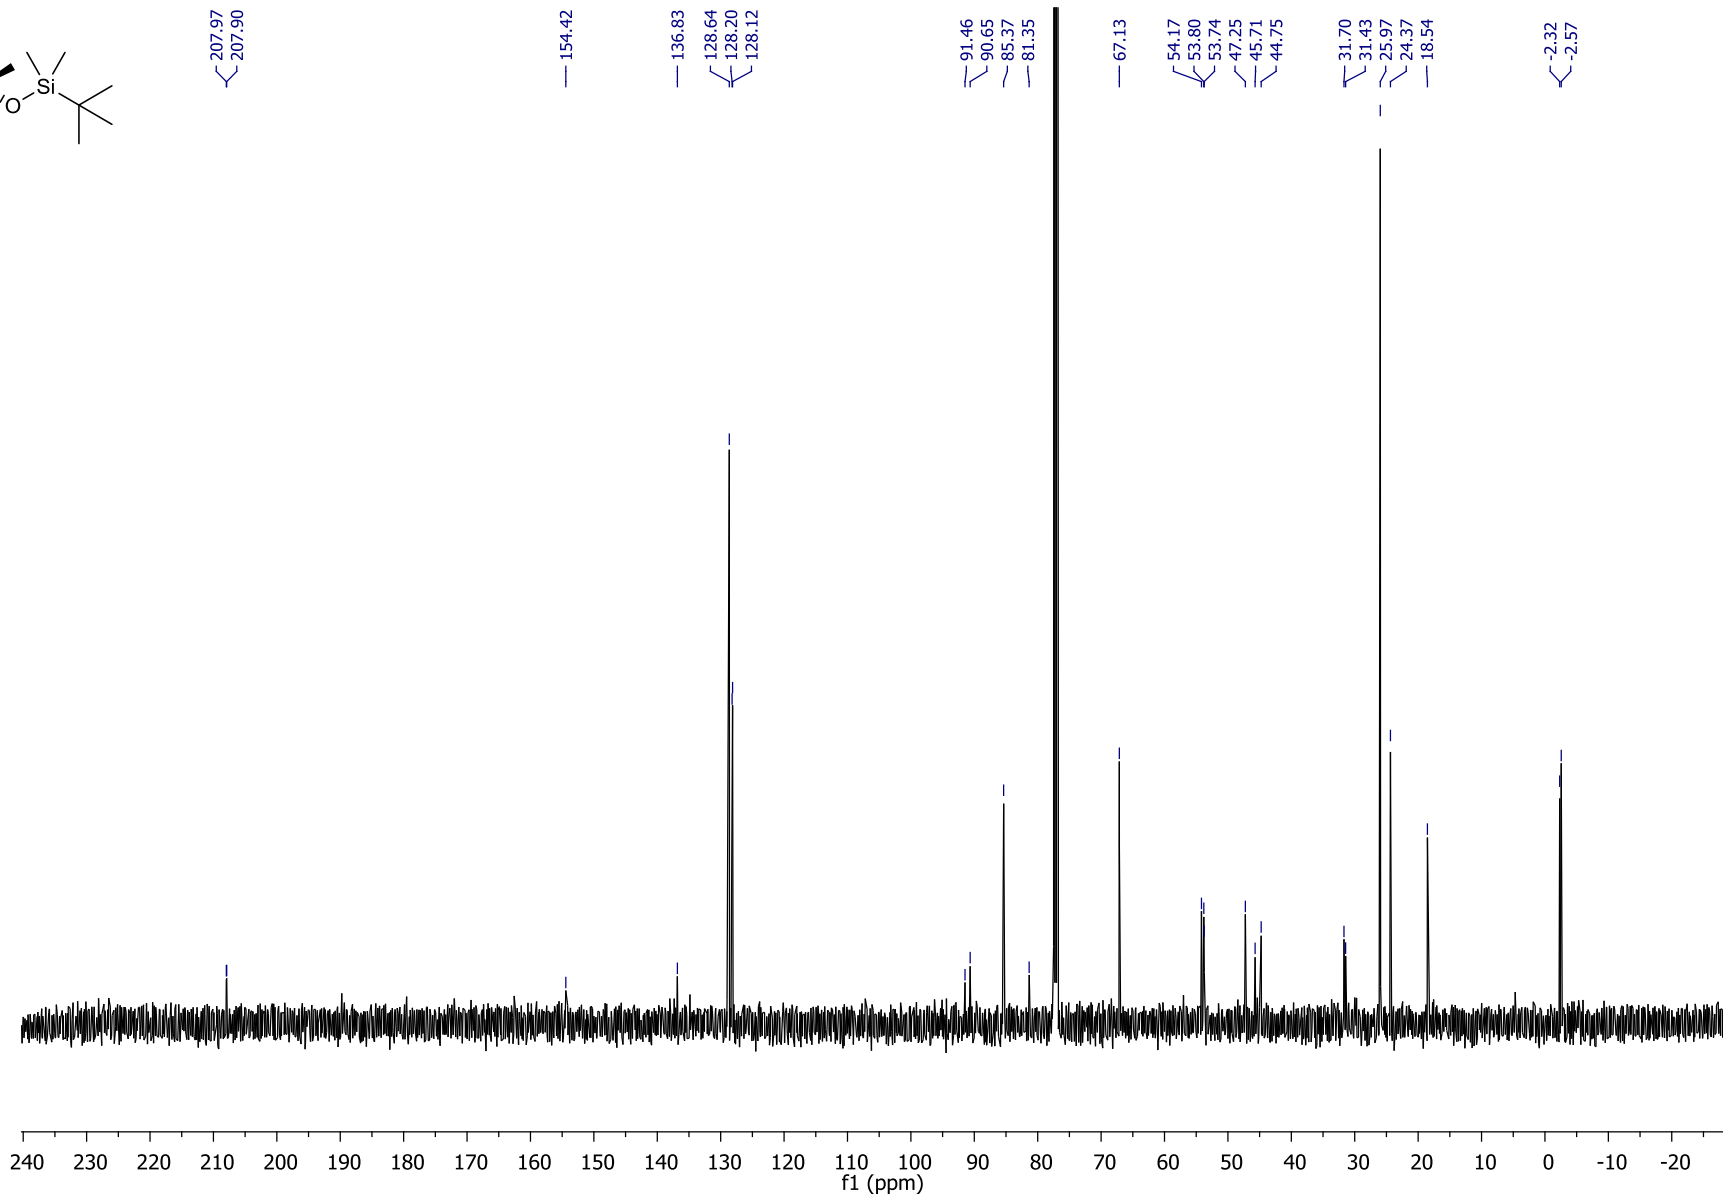

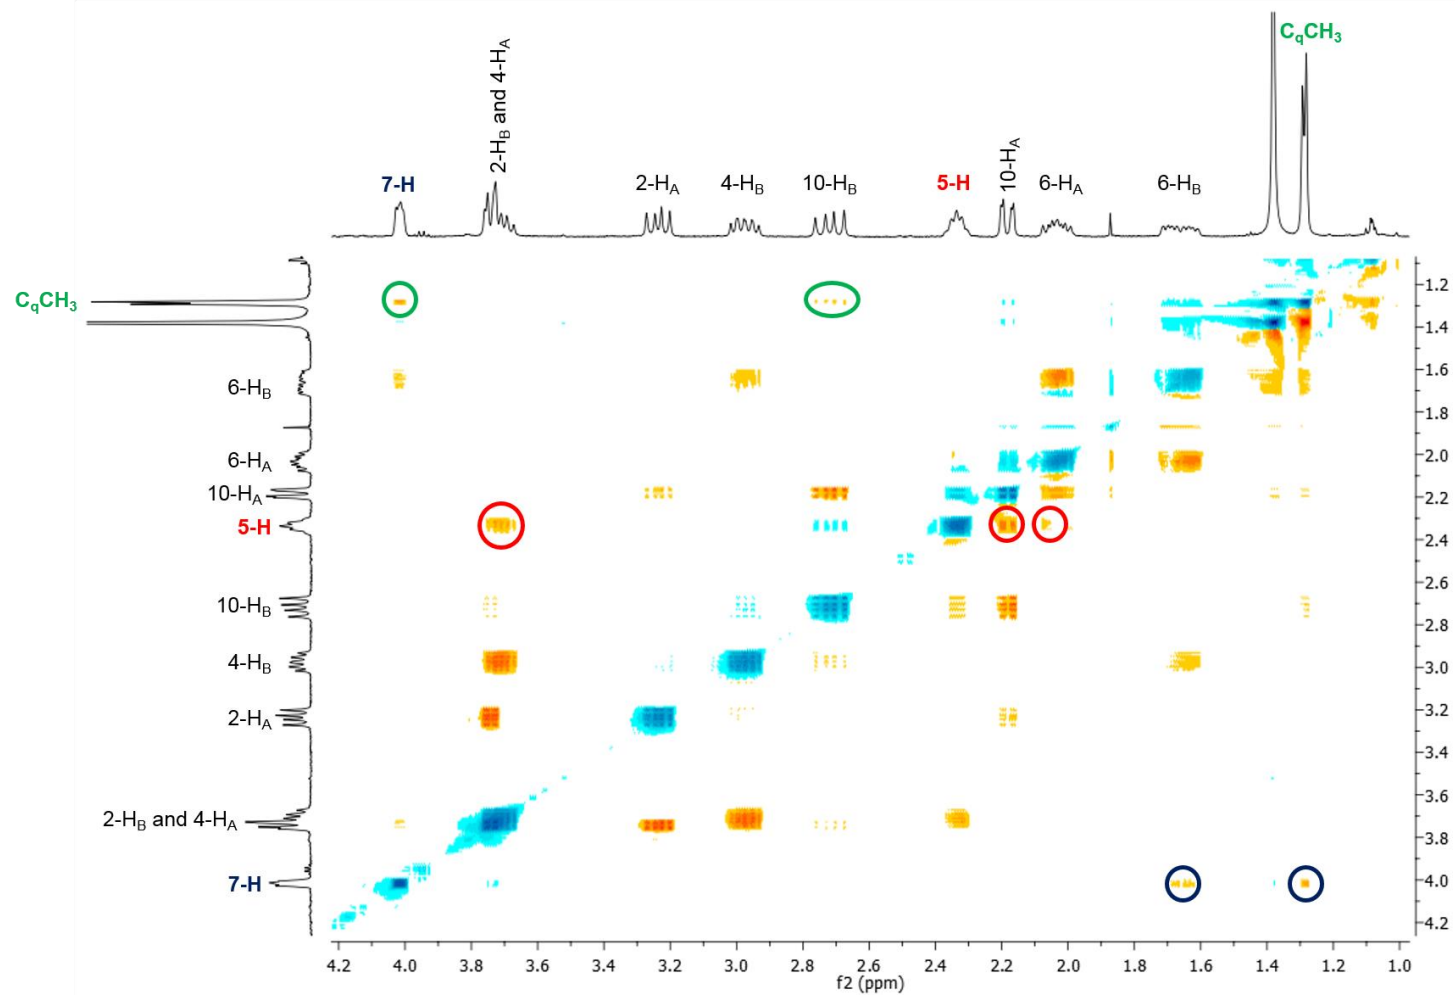

**S17 NOESY correlations:**

**C<sub>q</sub>CH<sub>3</sub>:** 7-H; 10-H<sub>B</sub>

**5-H:** 4-H<sub>A</sub>; 6-H<sub>A</sub>; 10-H<sub>A</sub>

**7-H:** C<sub>q</sub>CH<sub>3</sub>; 6-H<sub>B</sub>

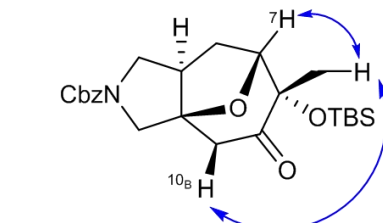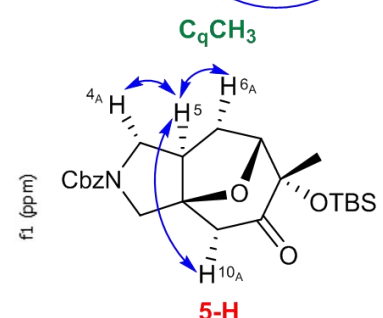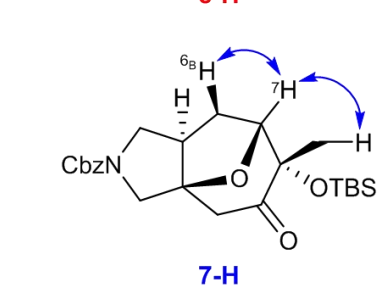

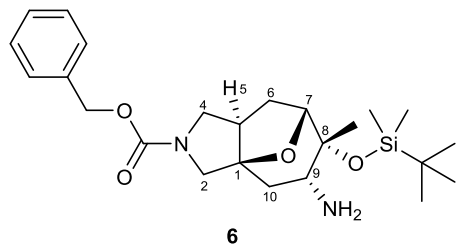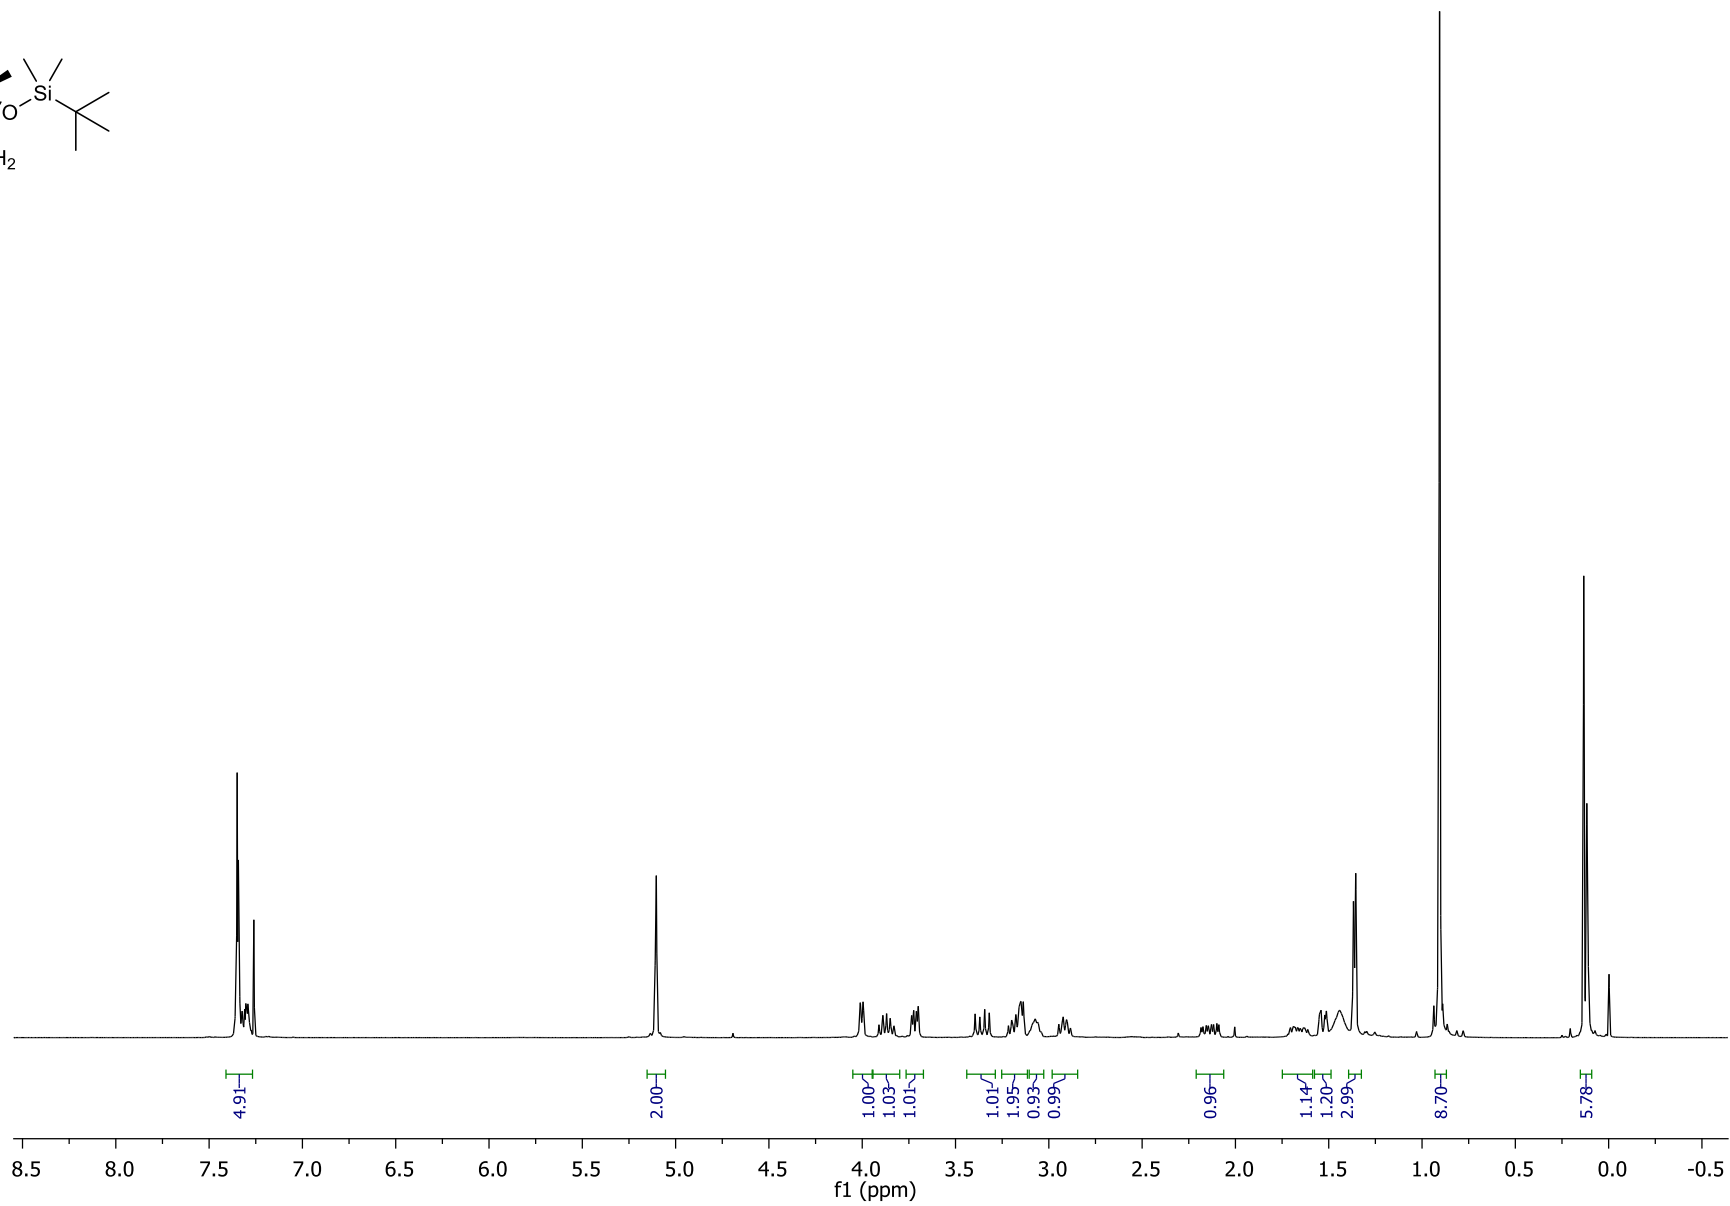

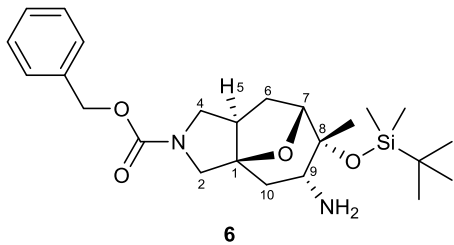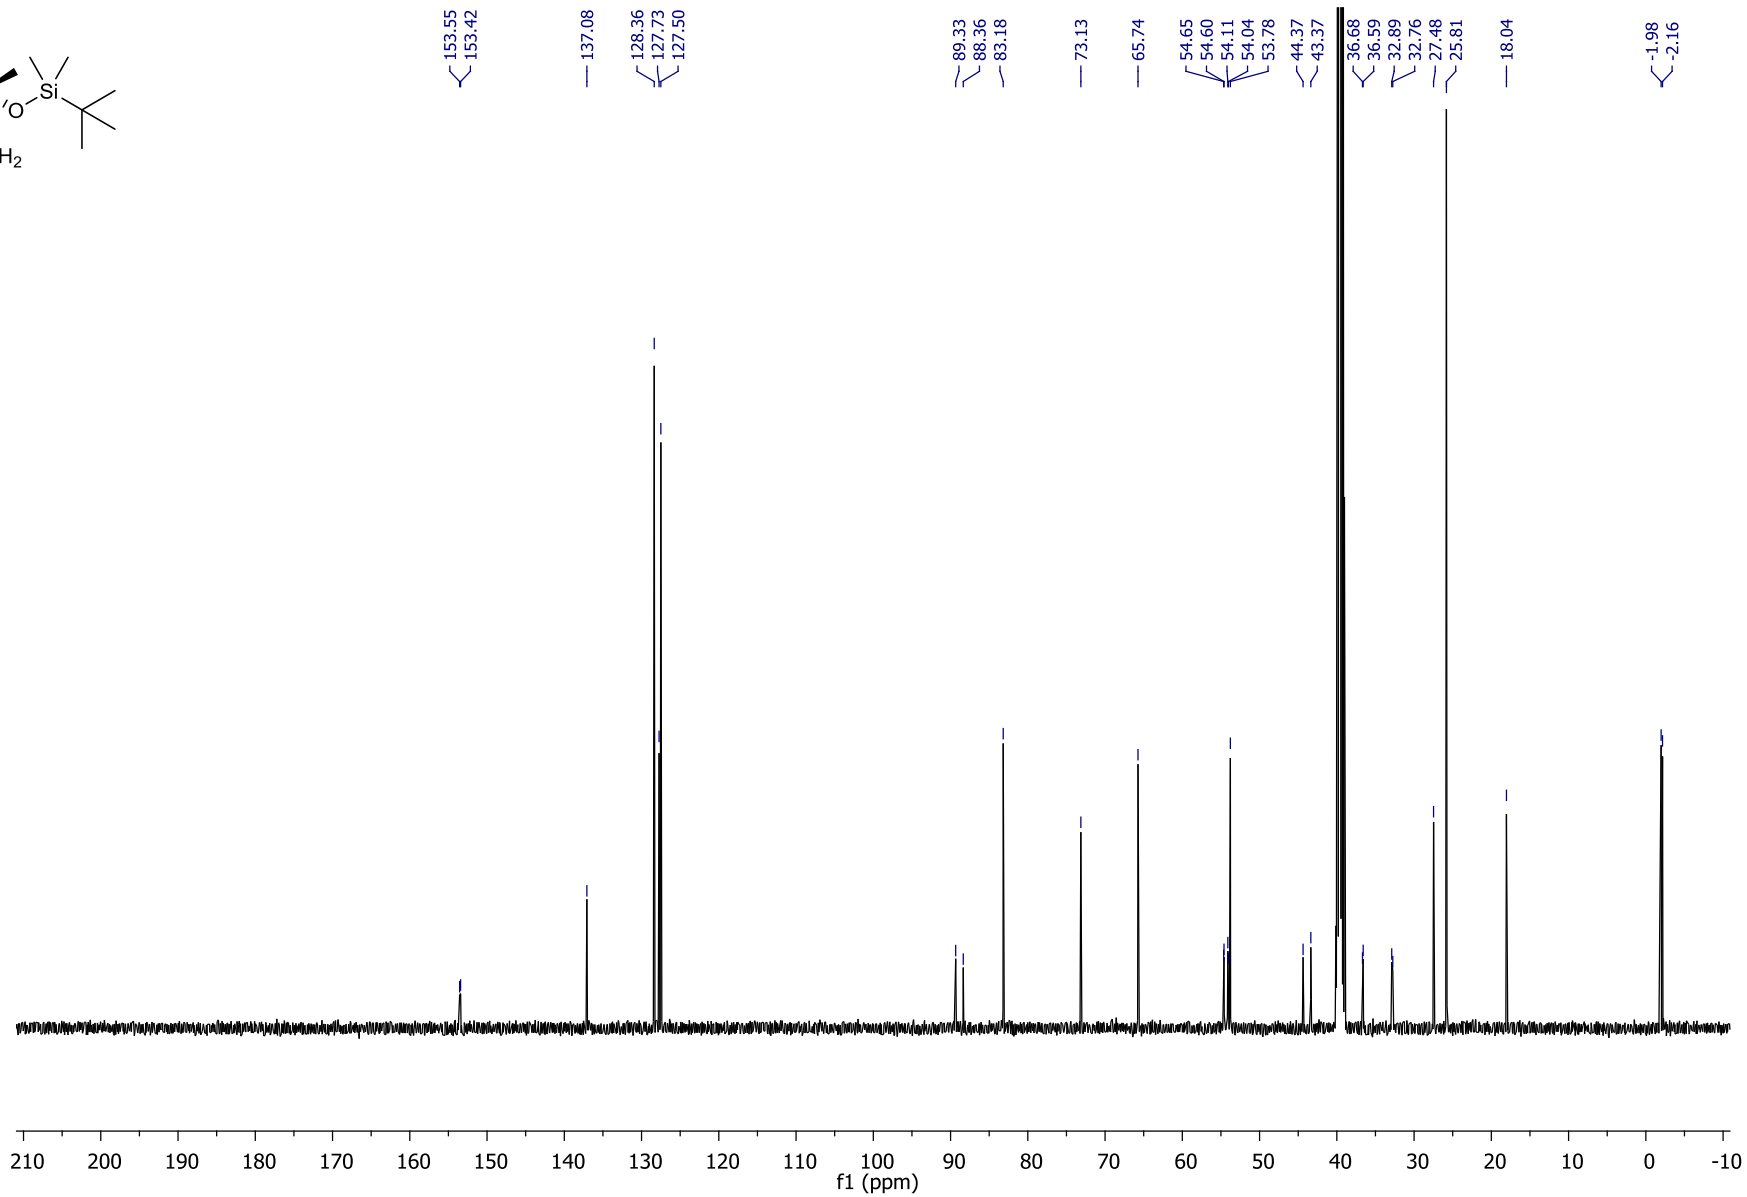

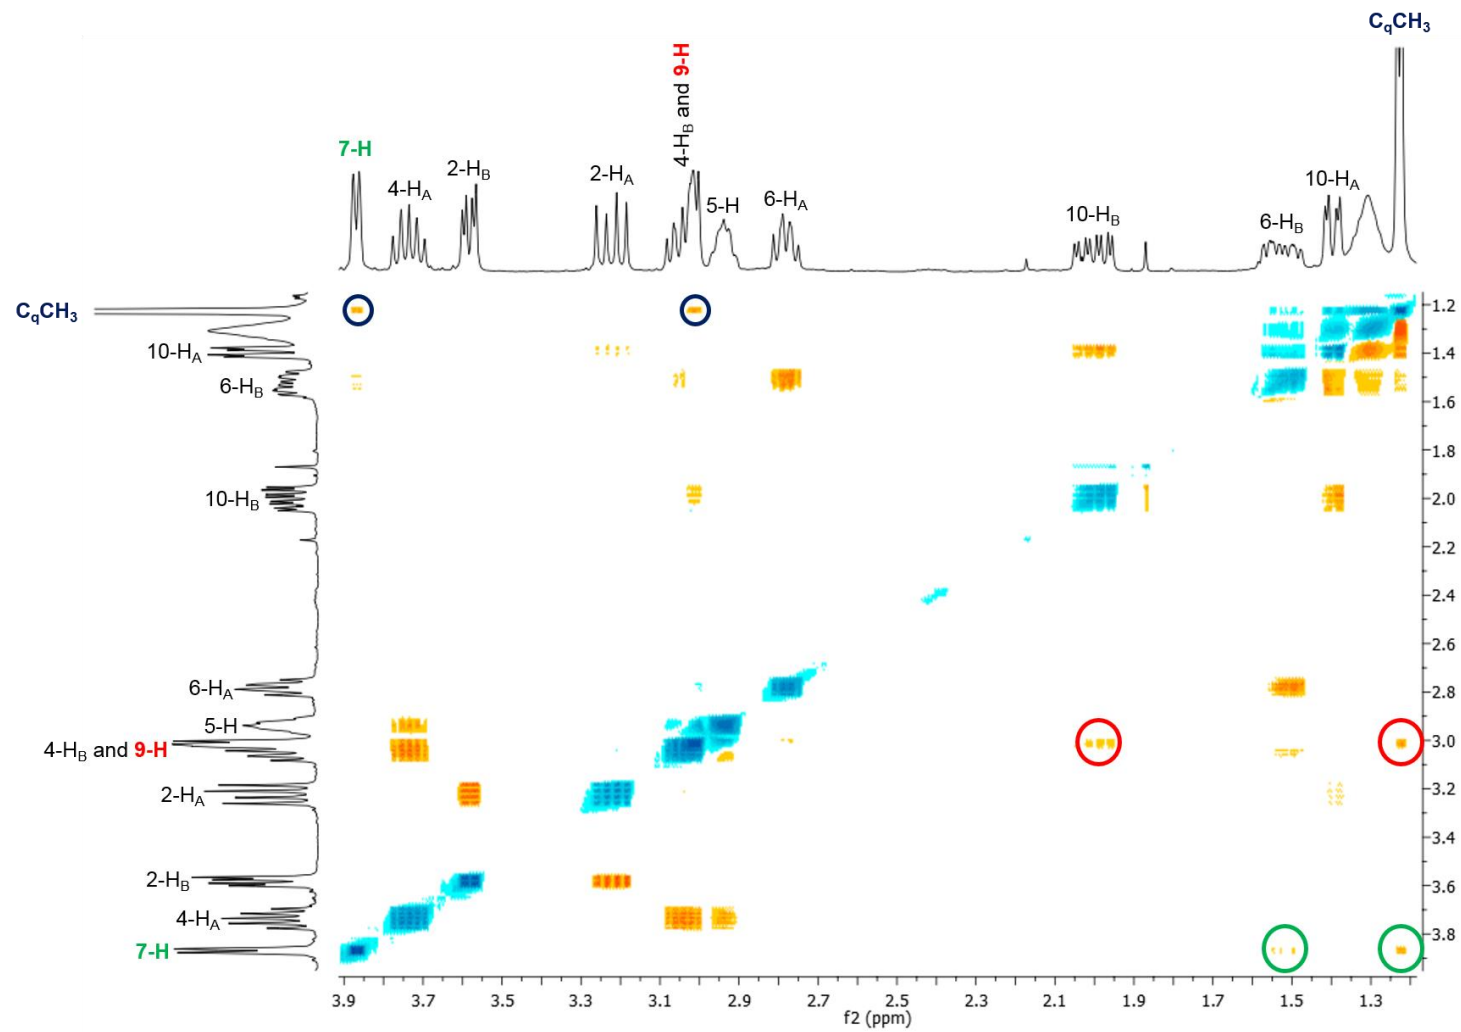

**6 NOESY correlations:**

**Me:** 7-H; 9-H

**7-H:** Me; 6-H<sub>B</sub>

**9-H:** Me; 10-H<sub>B</sub>

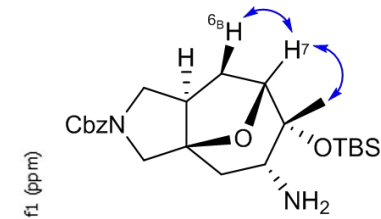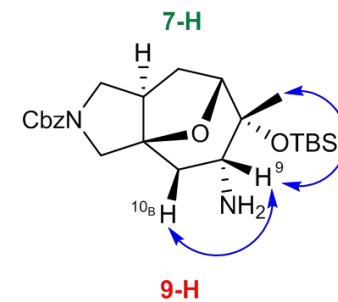

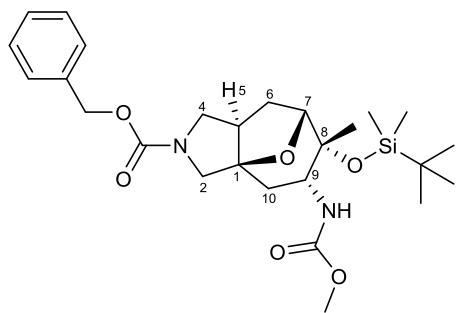

S18

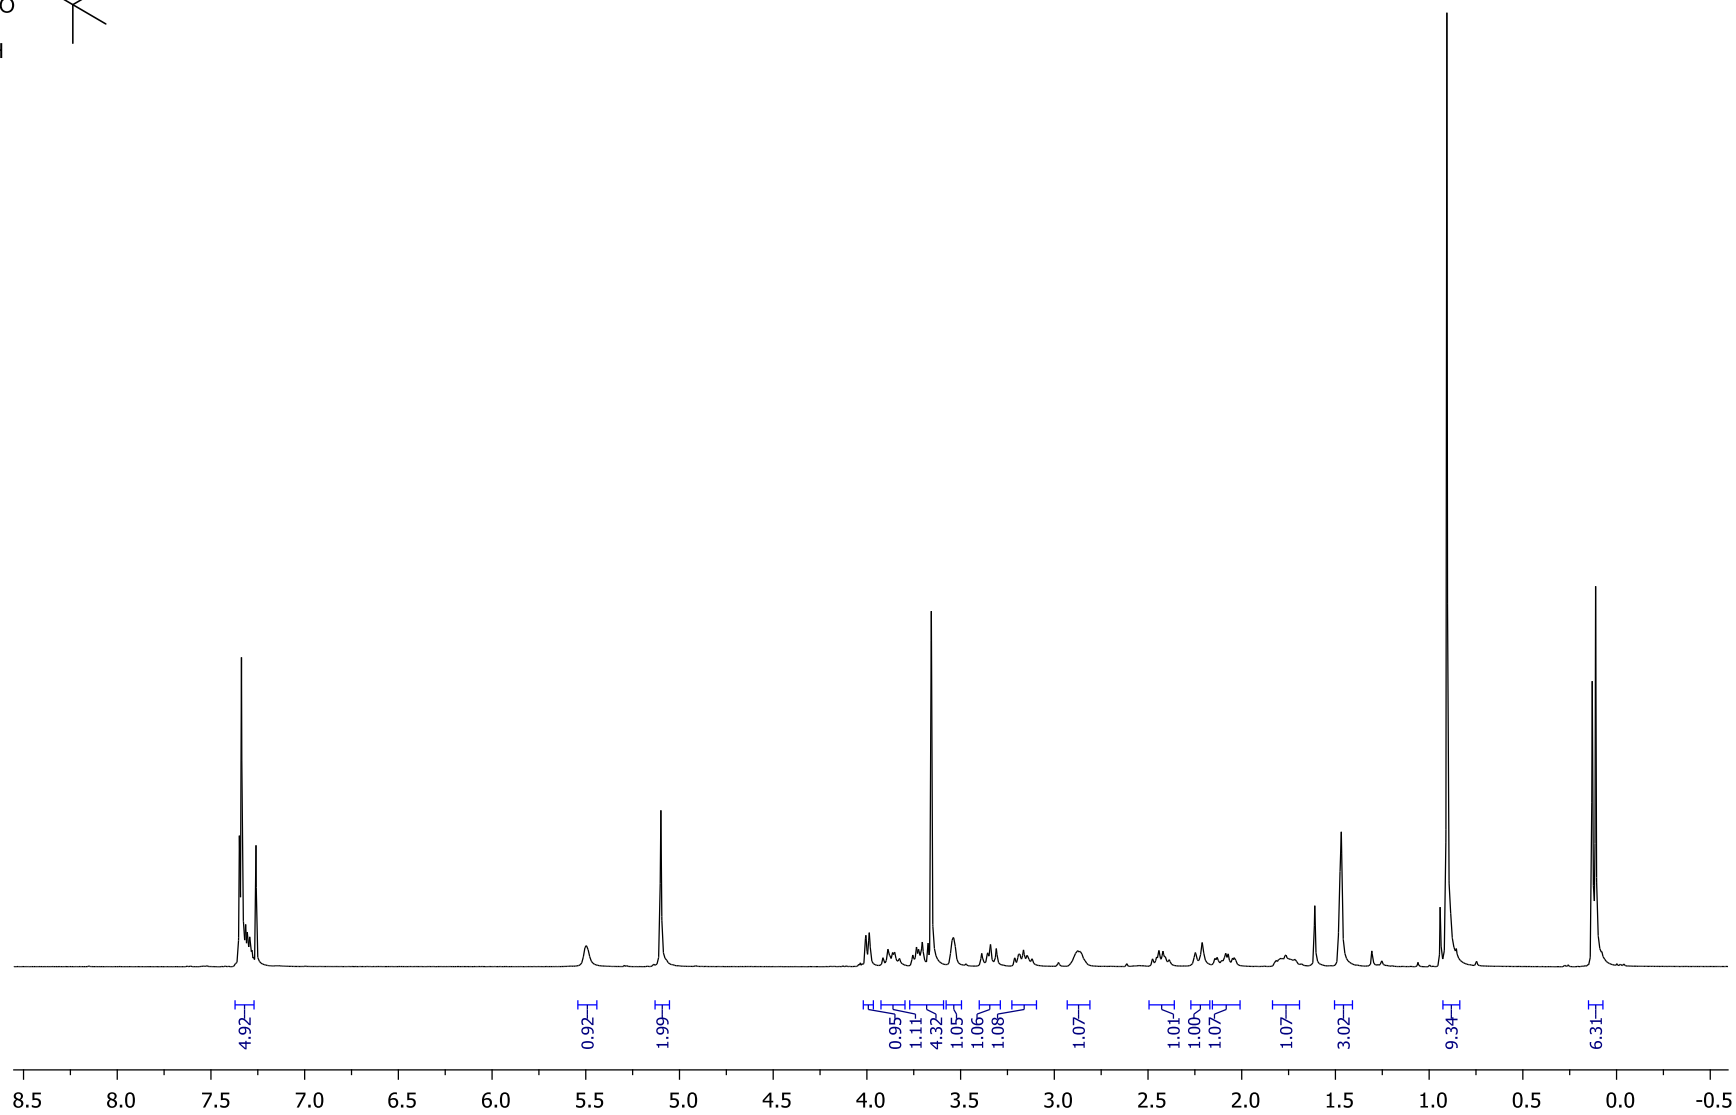

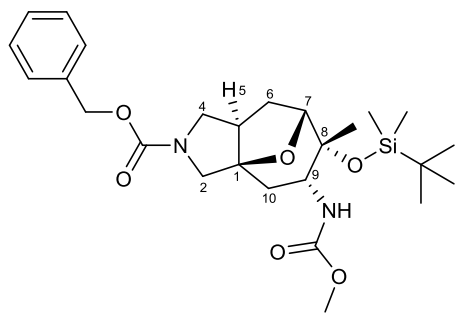

S18

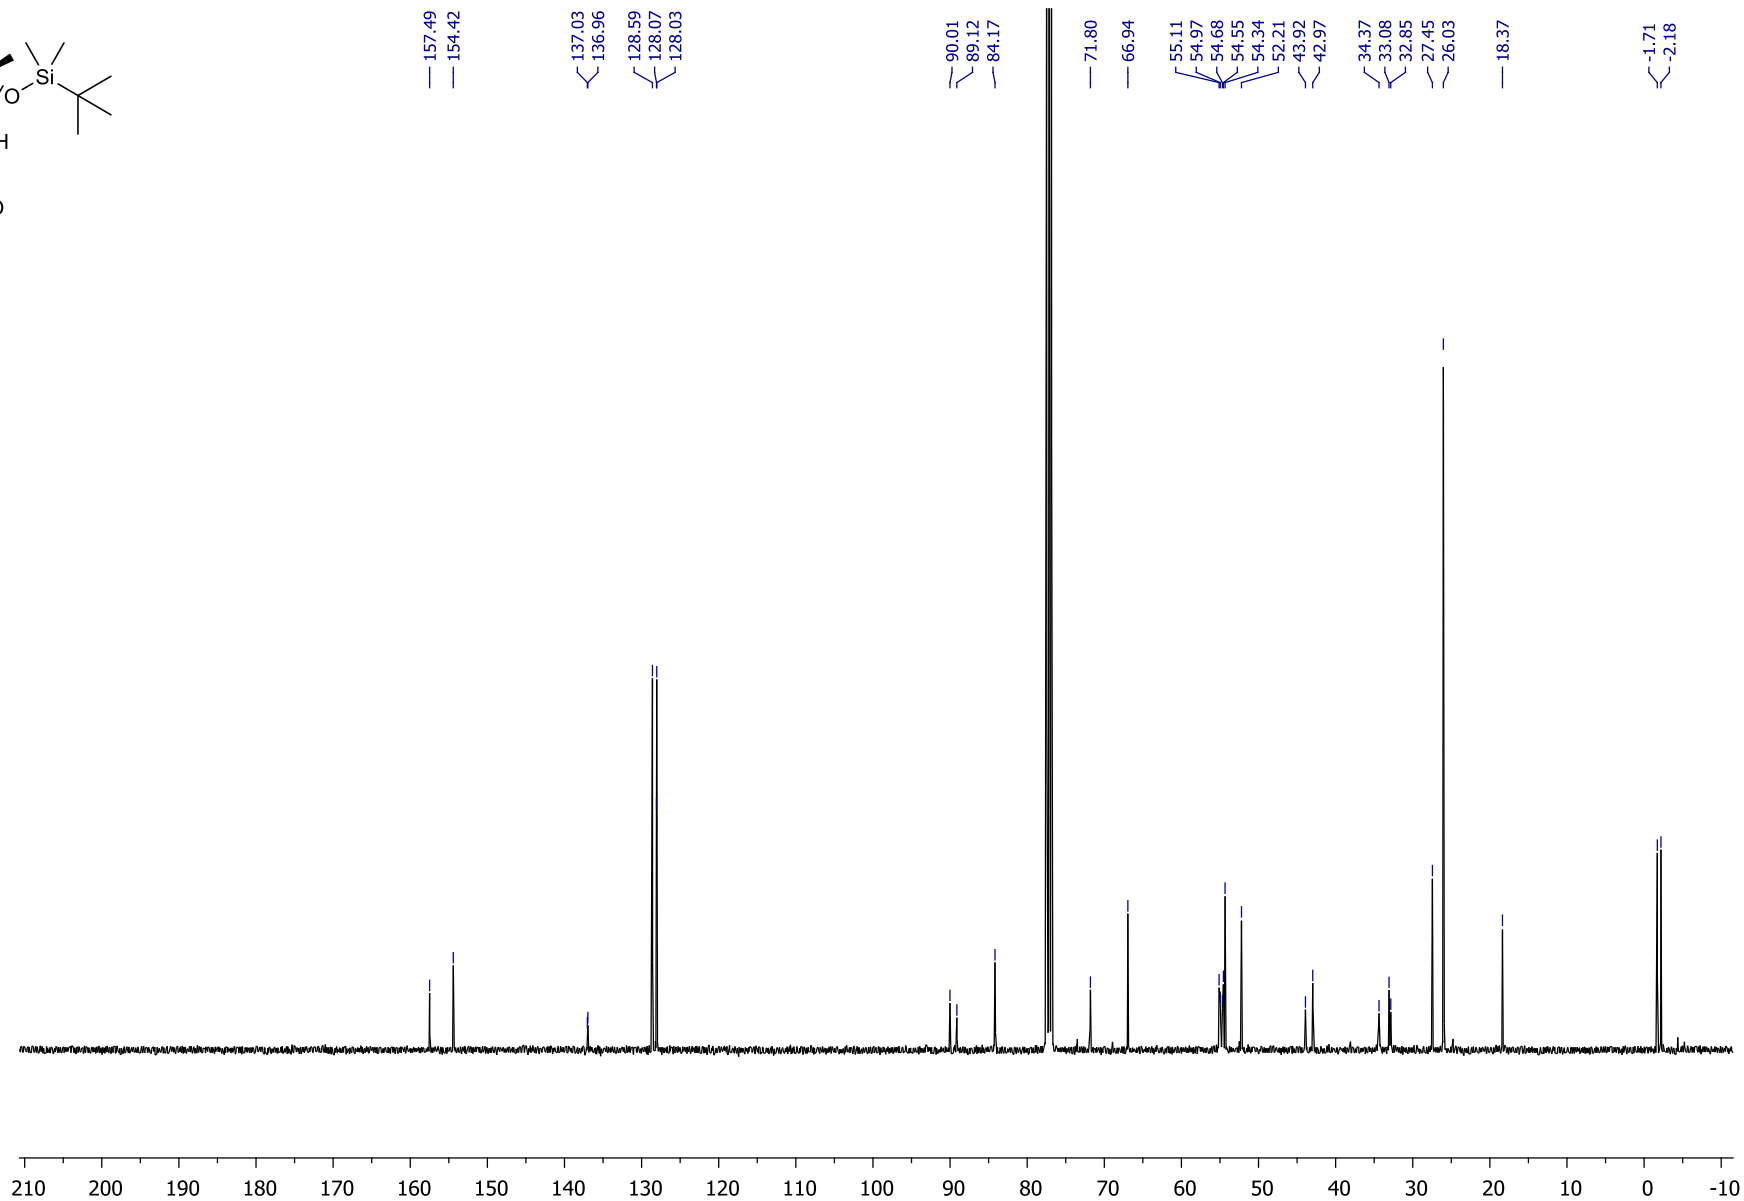



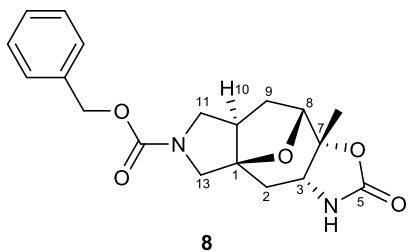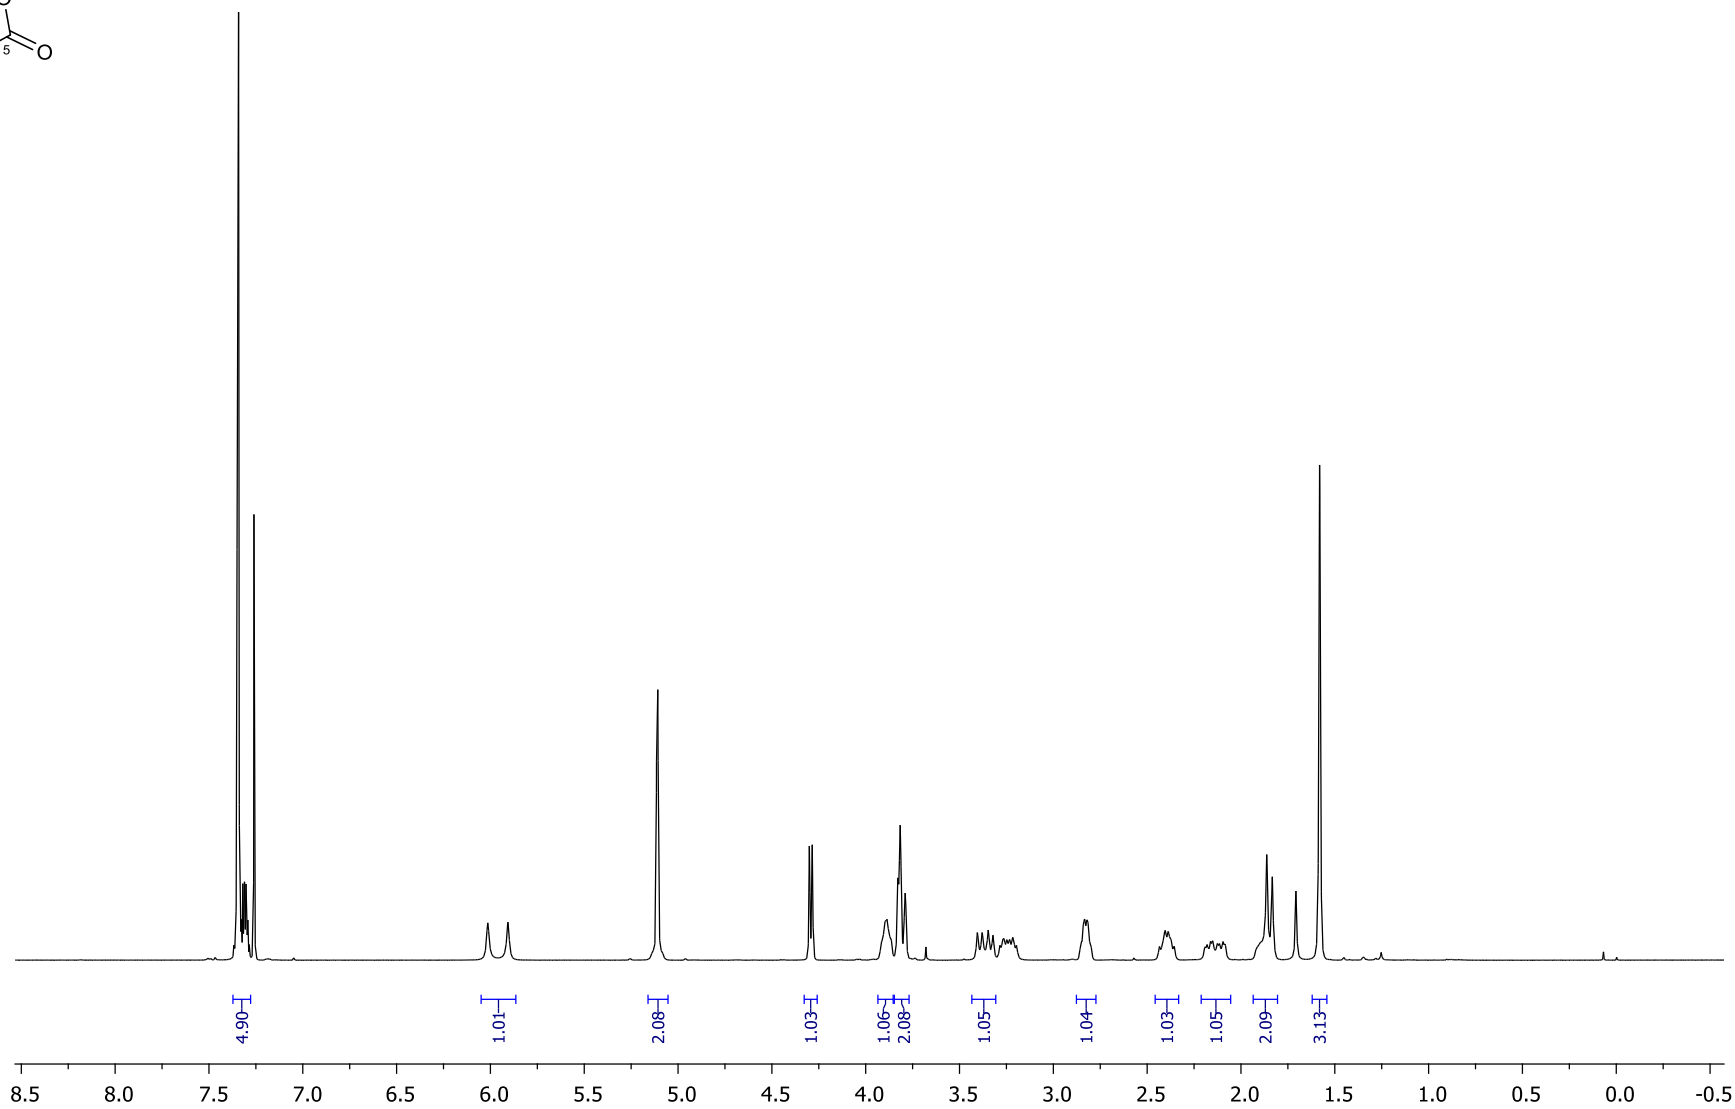

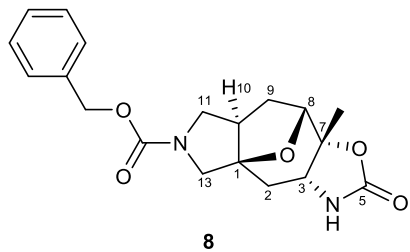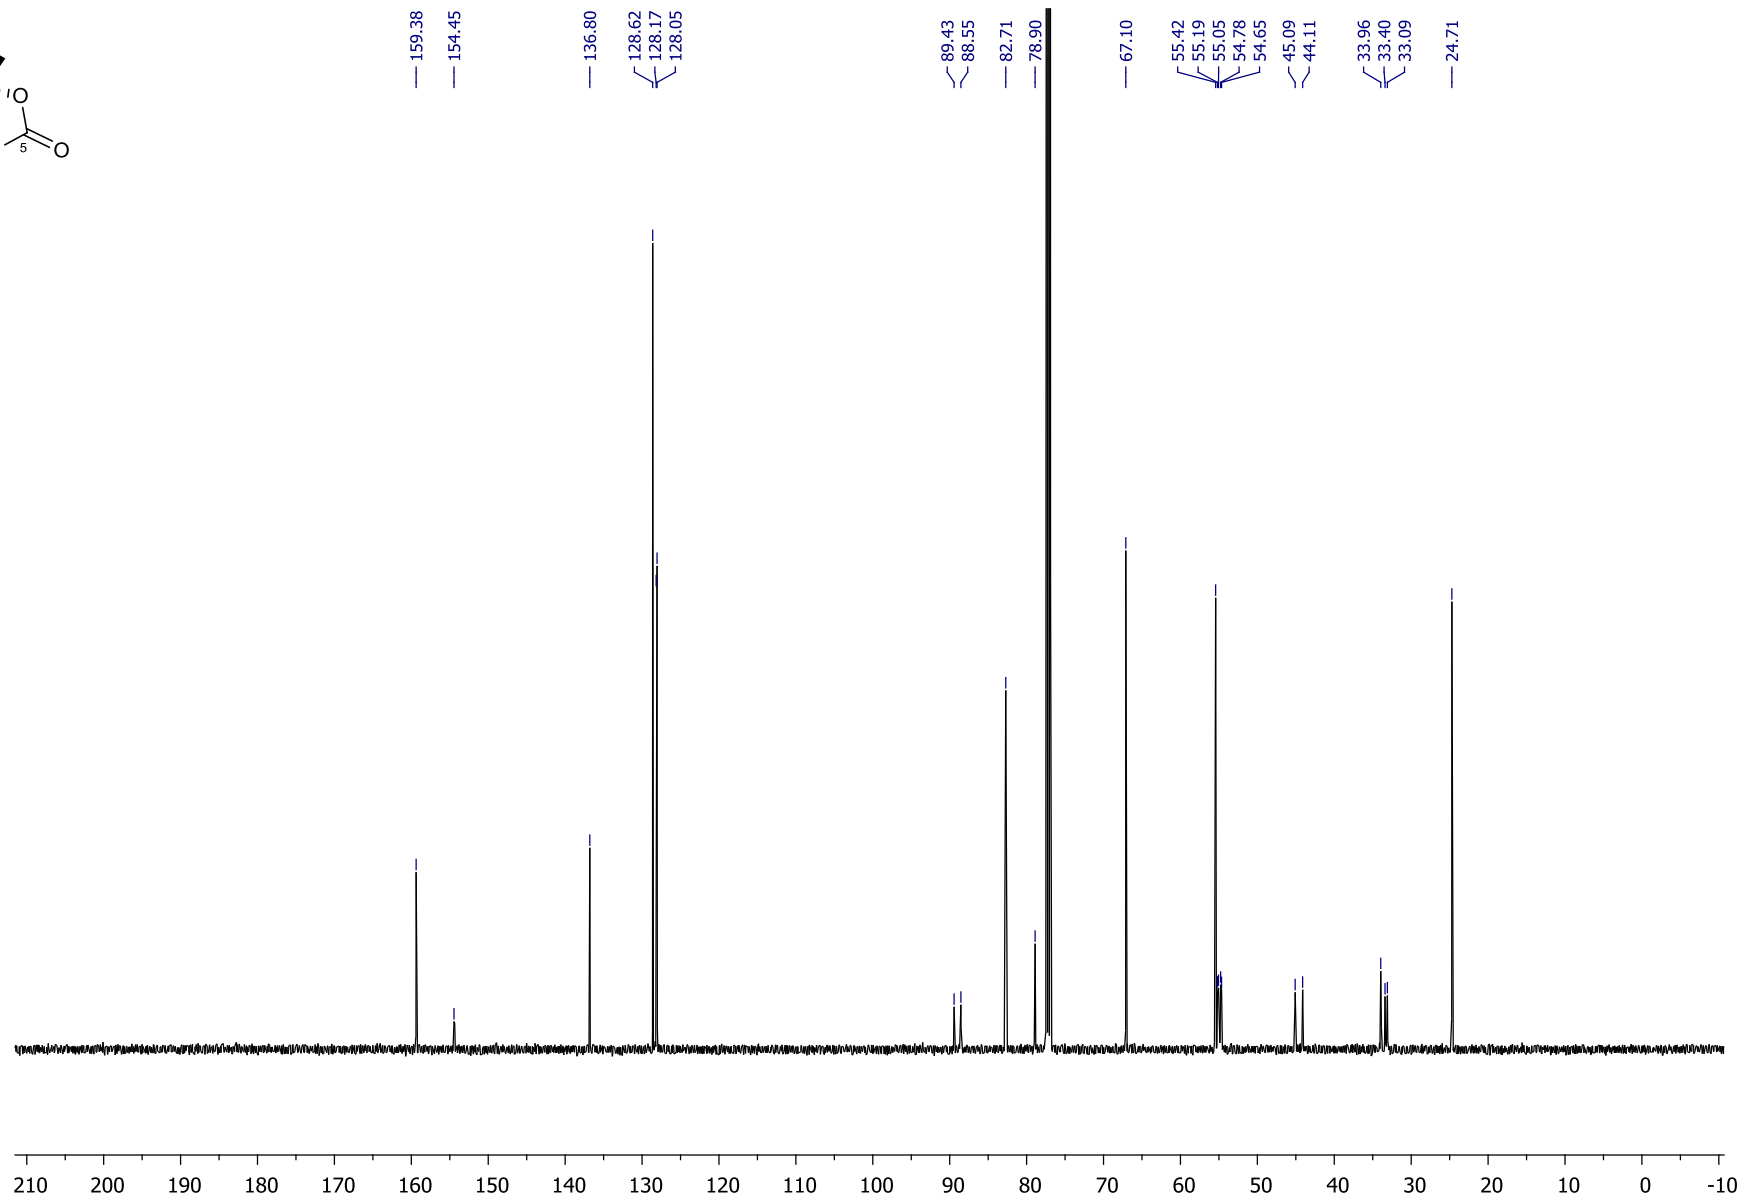

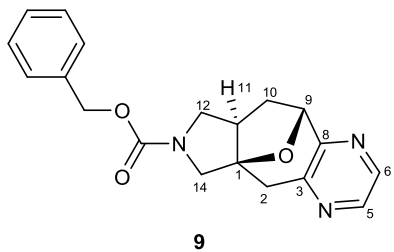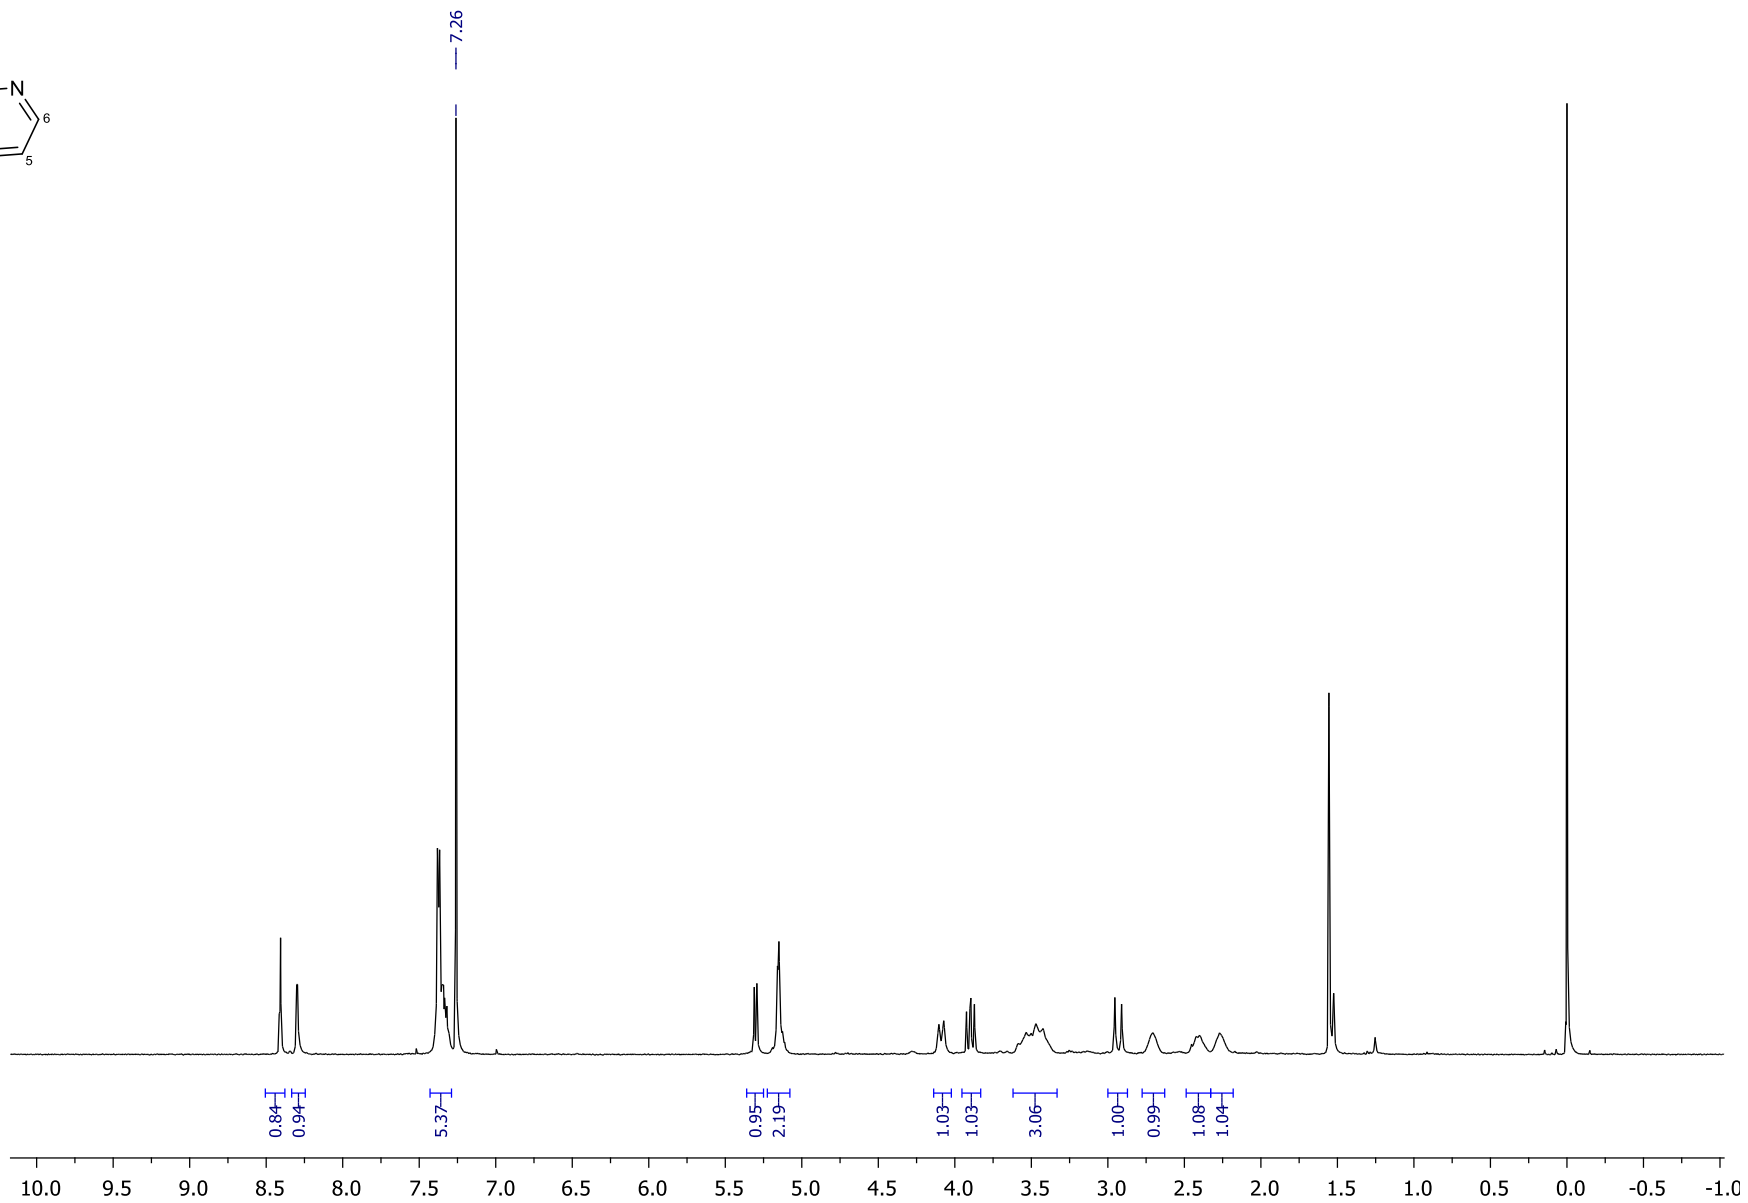

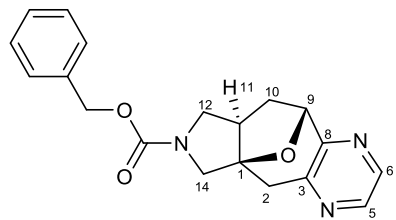

**9**

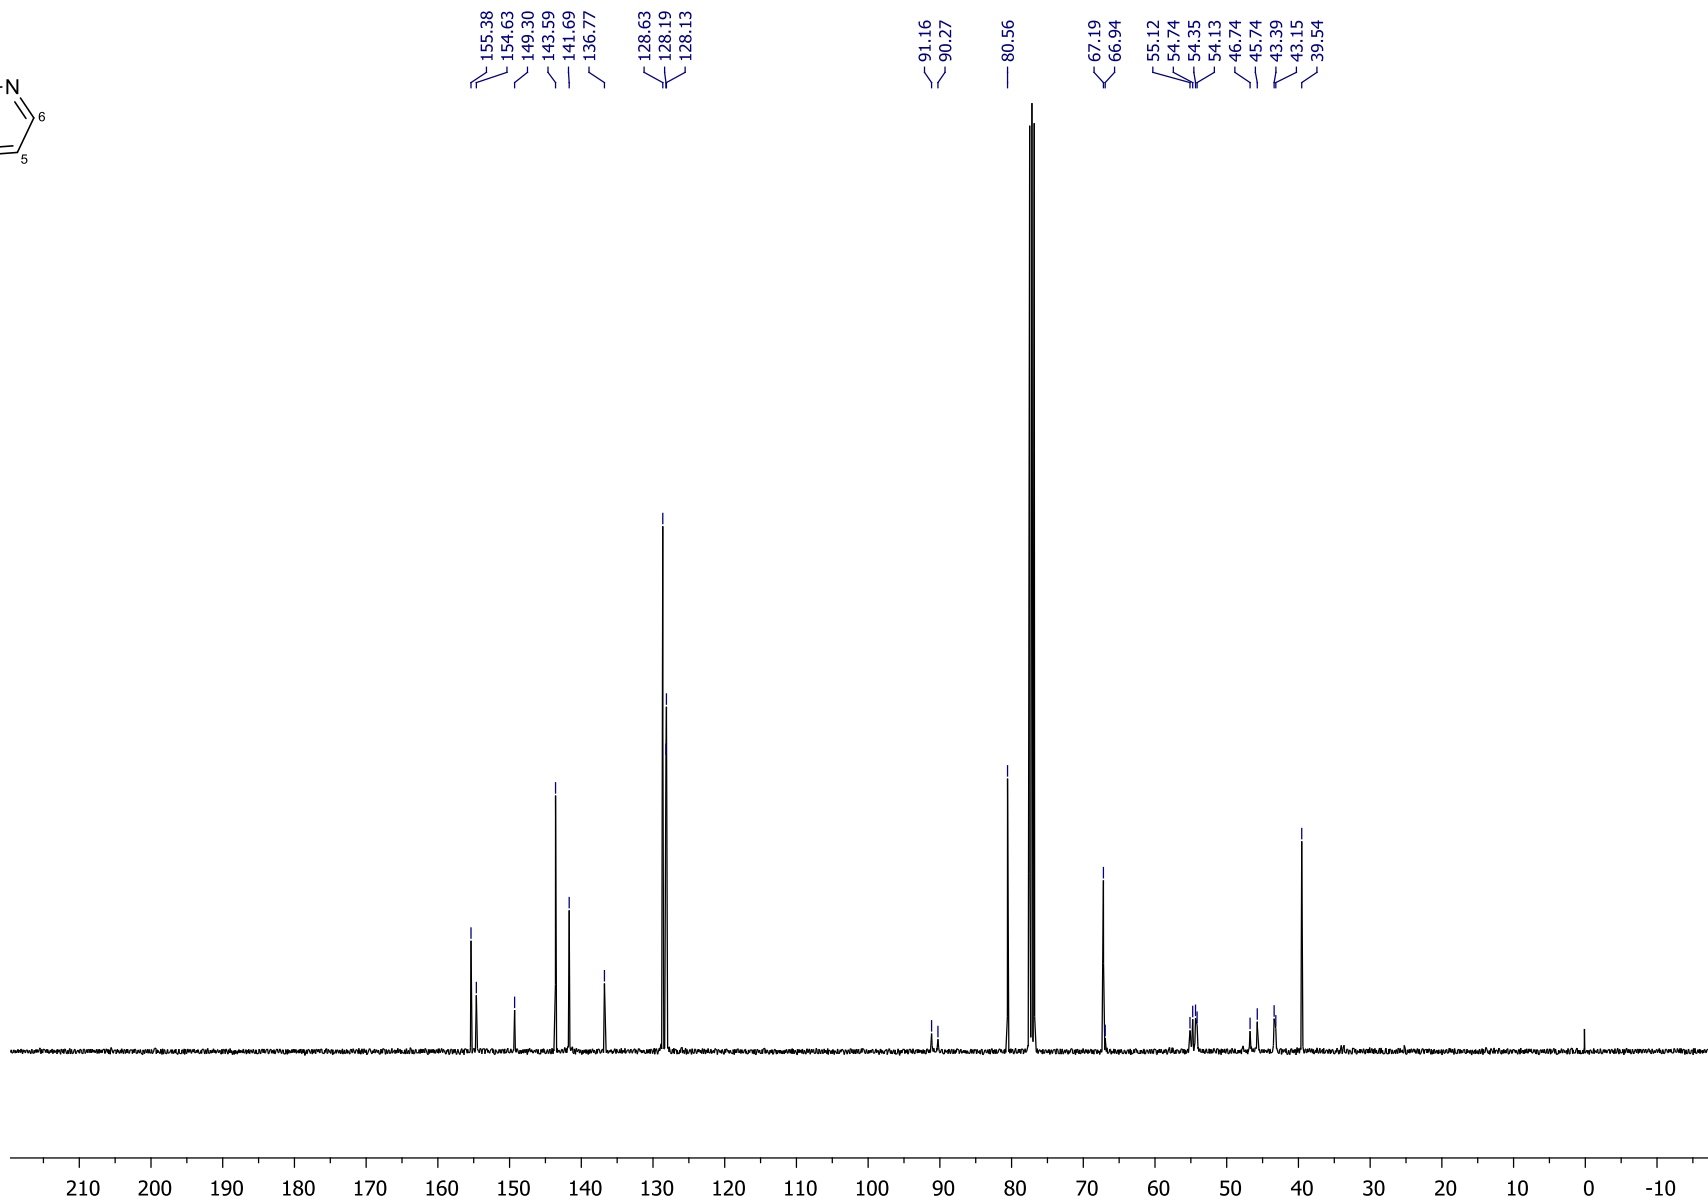

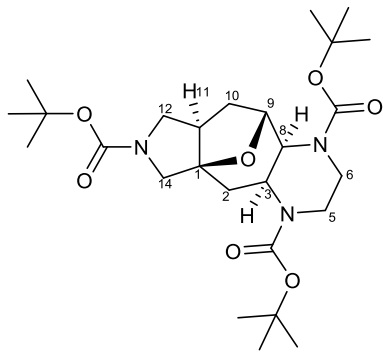

S19

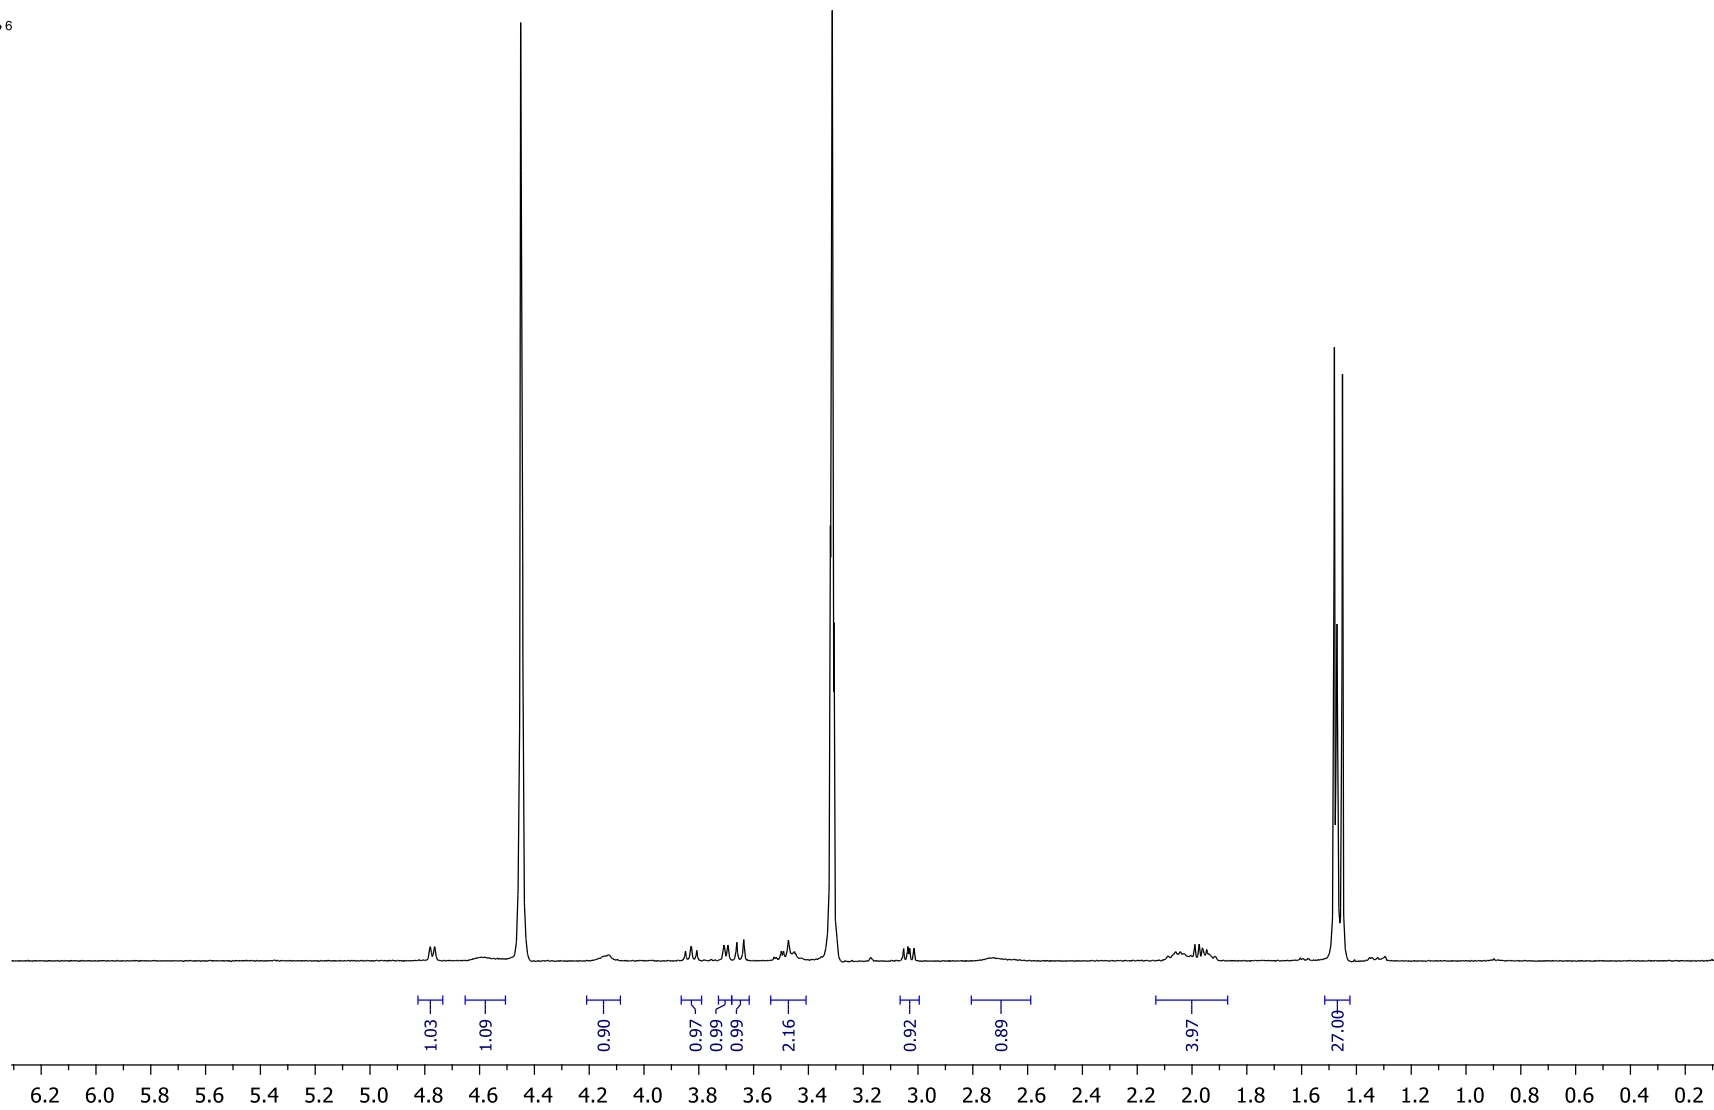

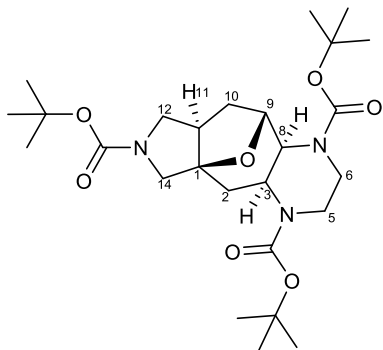

S19

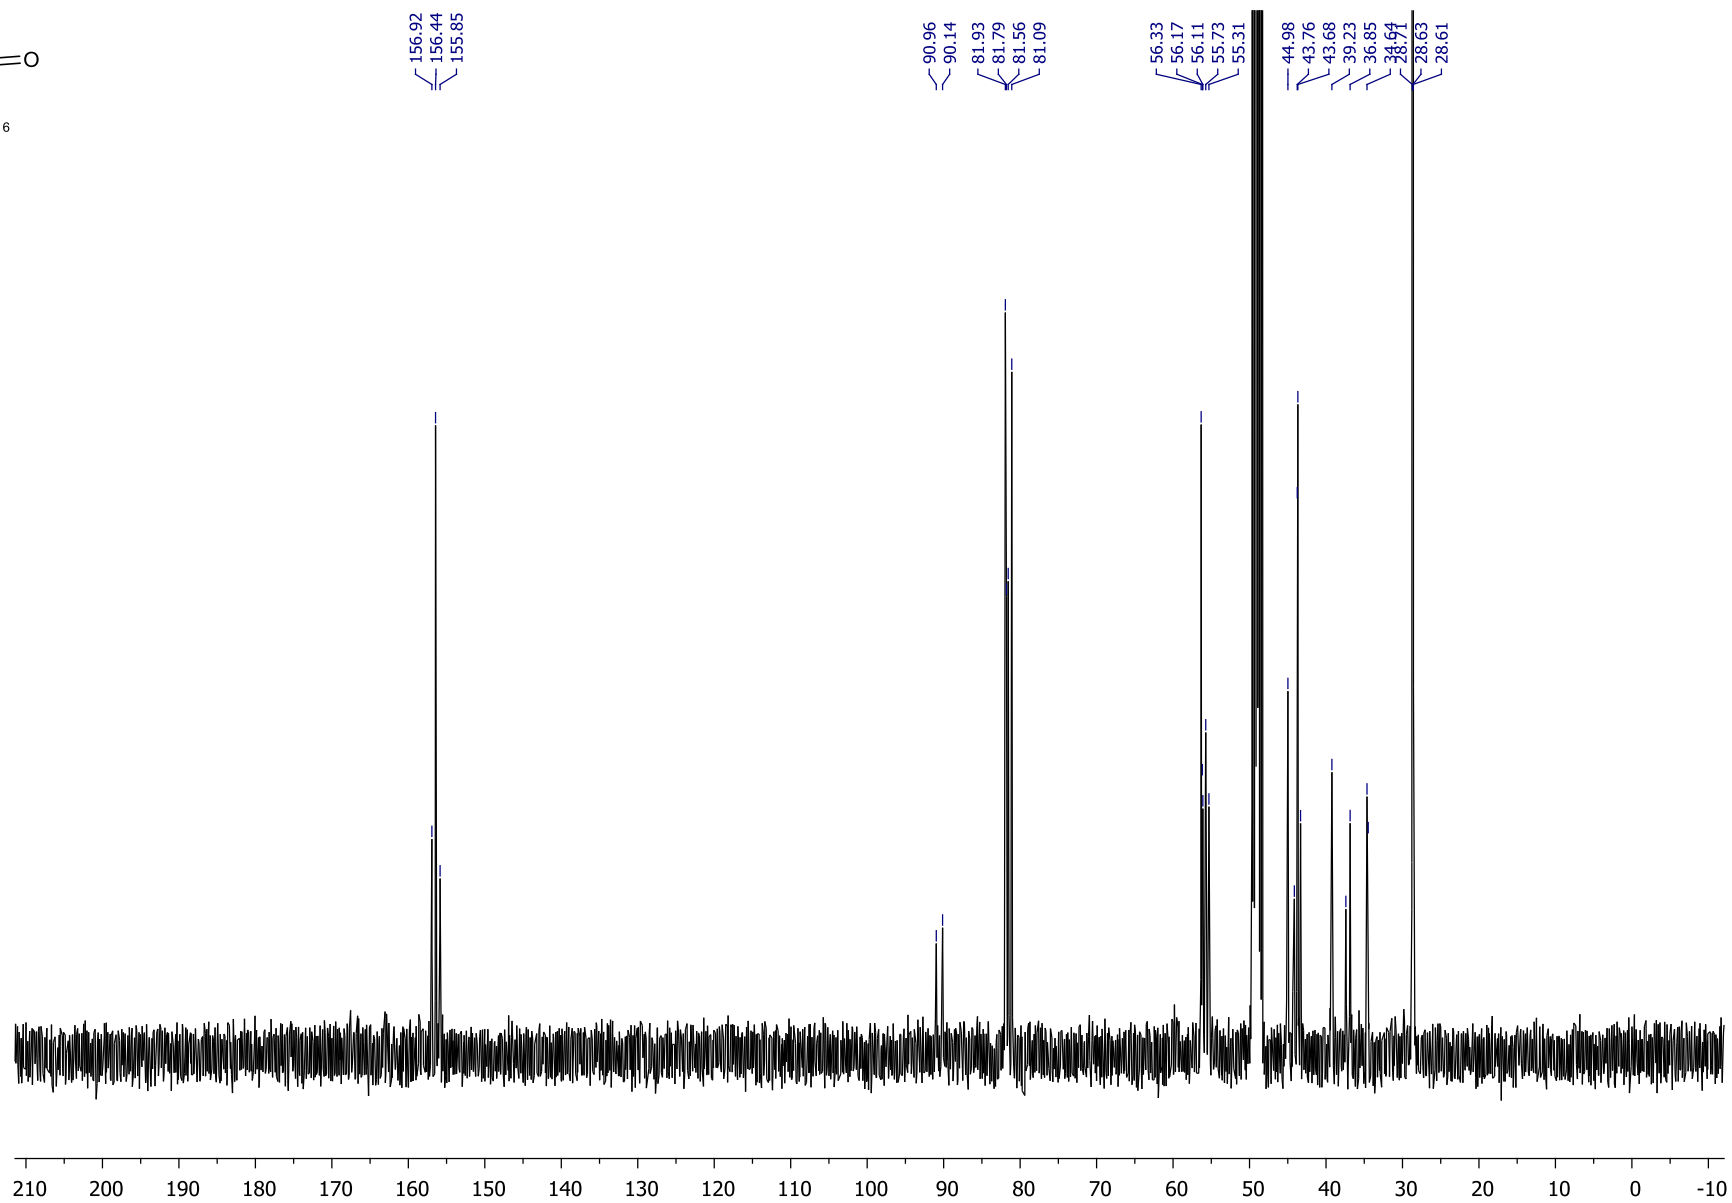

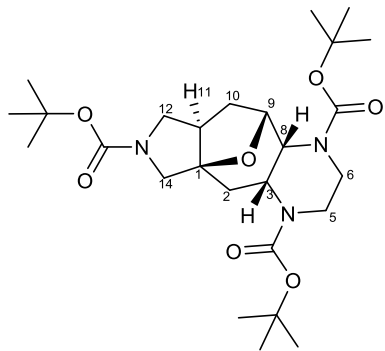

S20

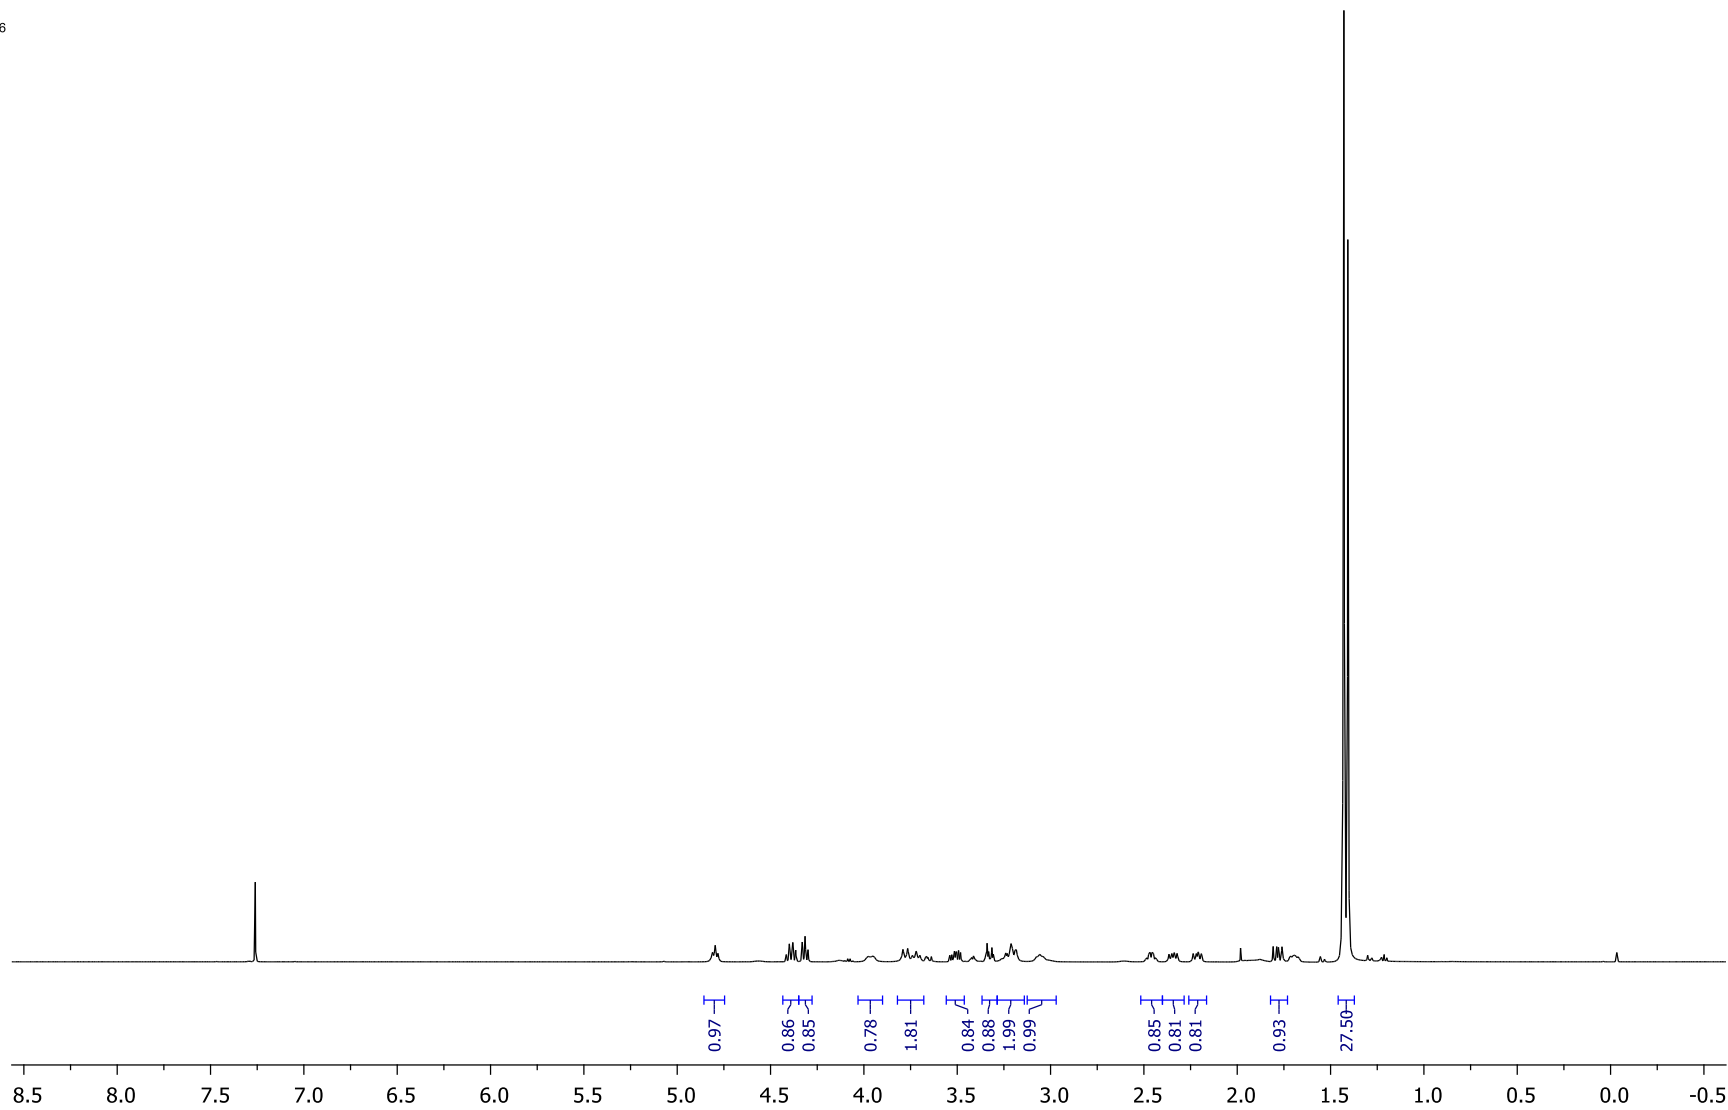

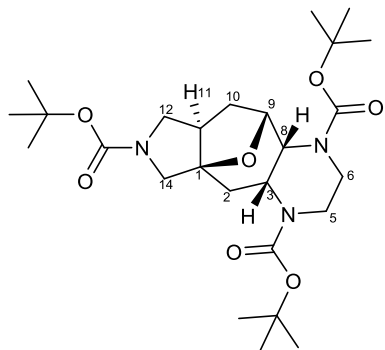

S20

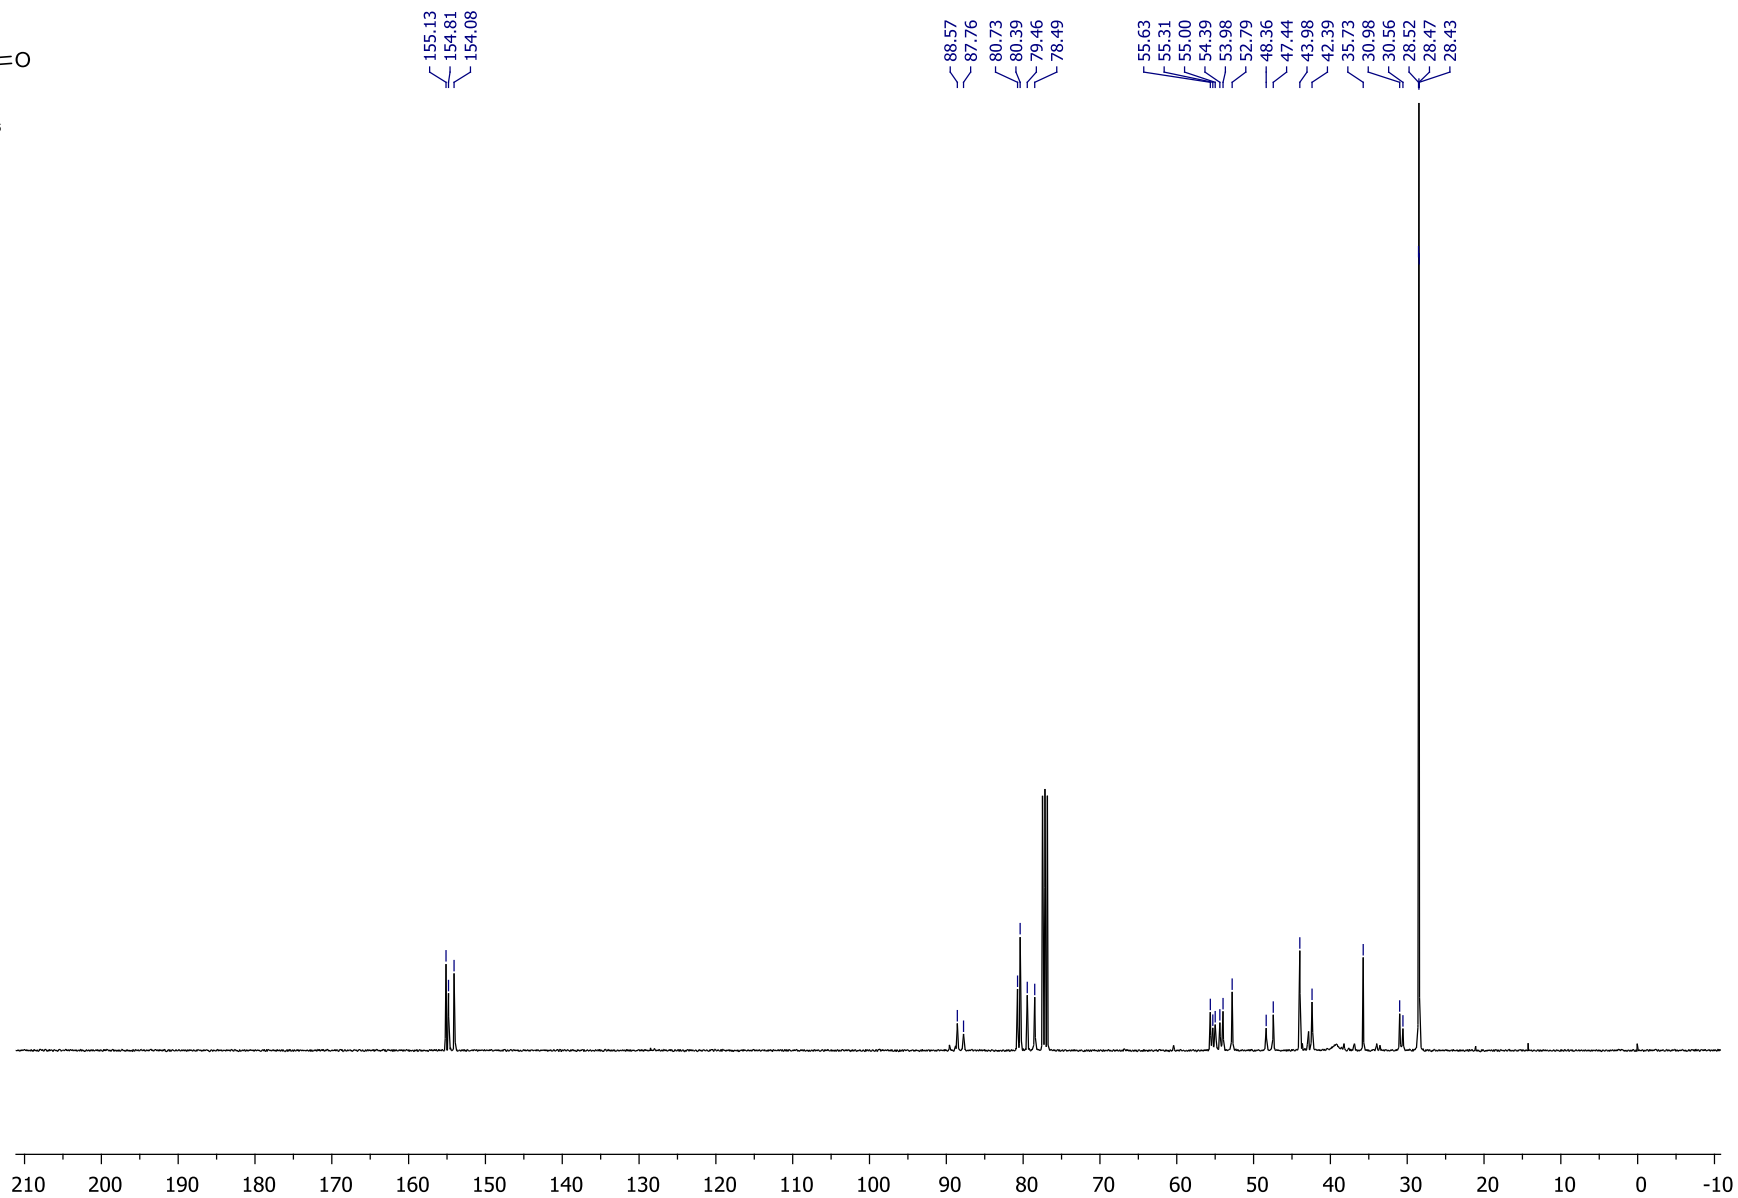



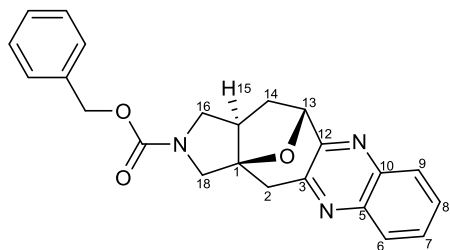

S21

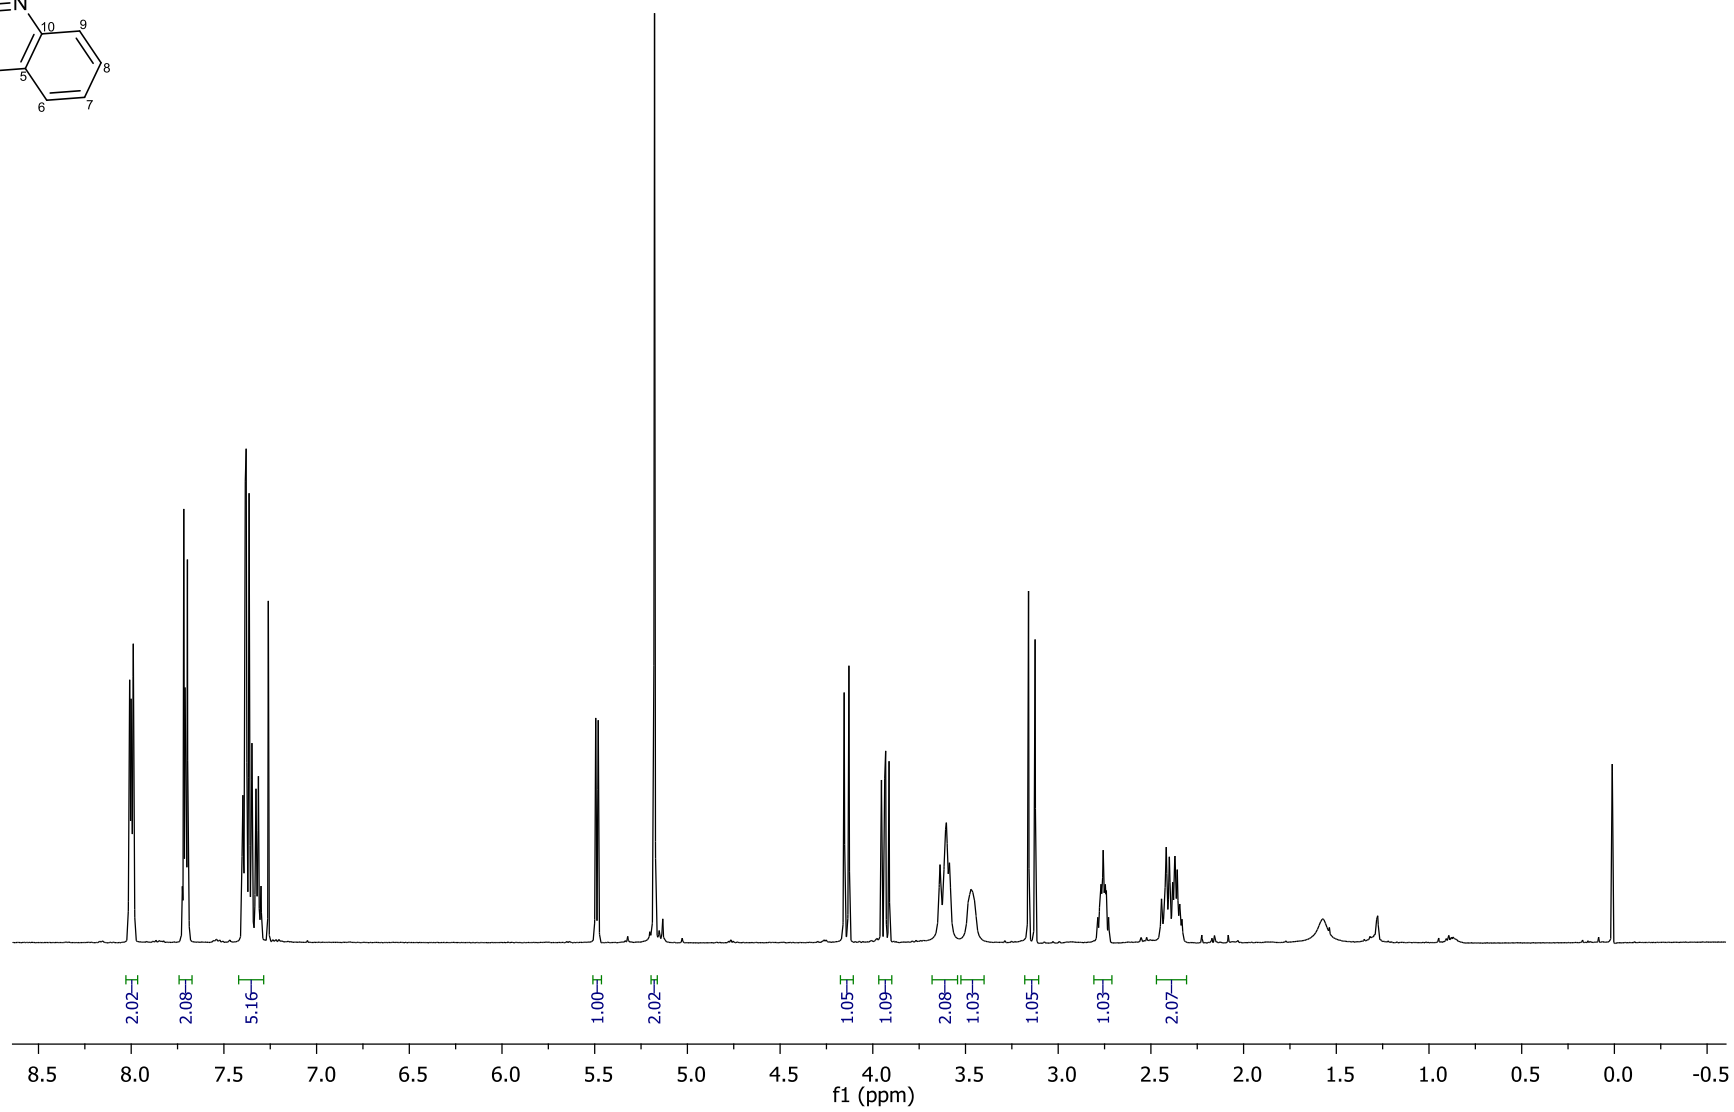

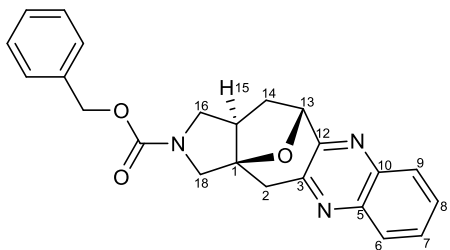

S21

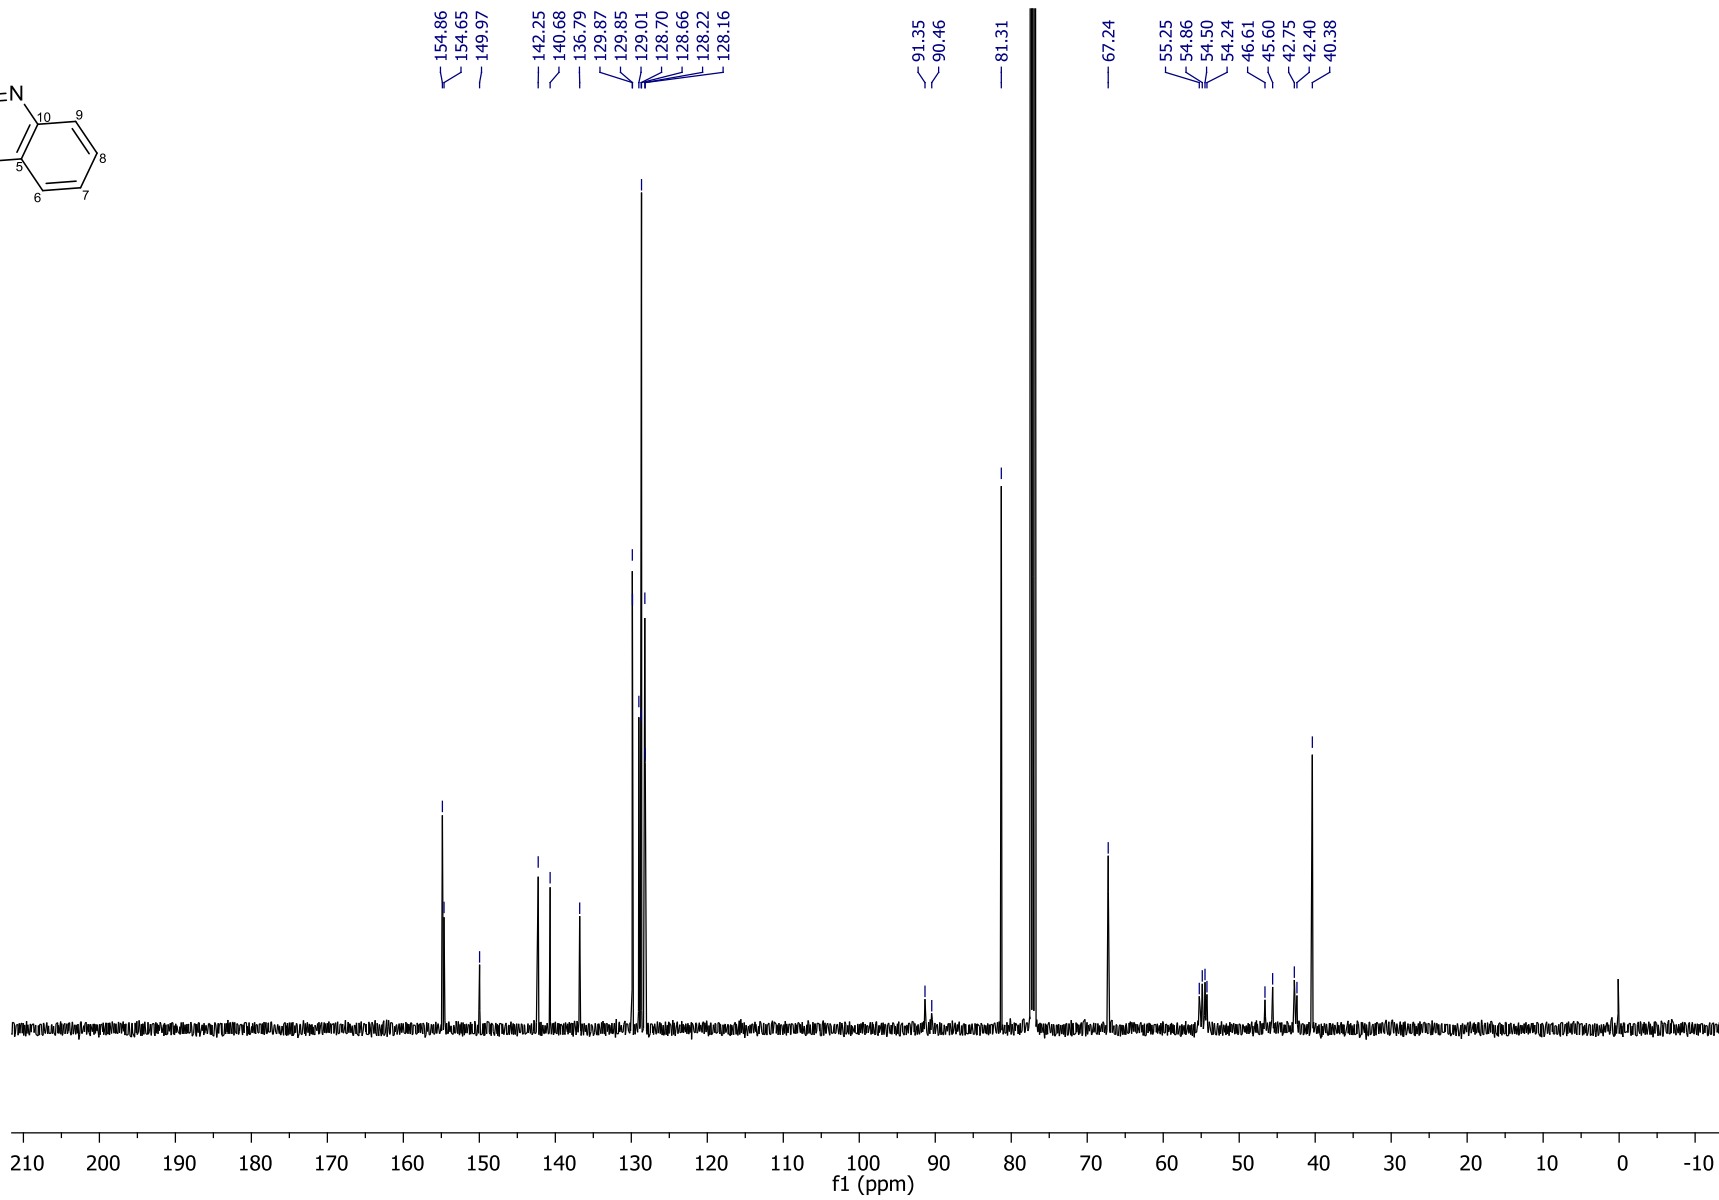

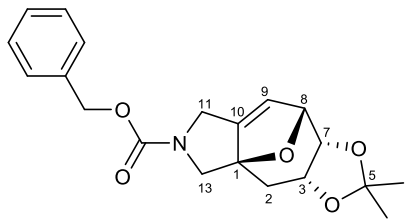

**S22**

(DMSO-d<sub>6</sub> @ 343 K)

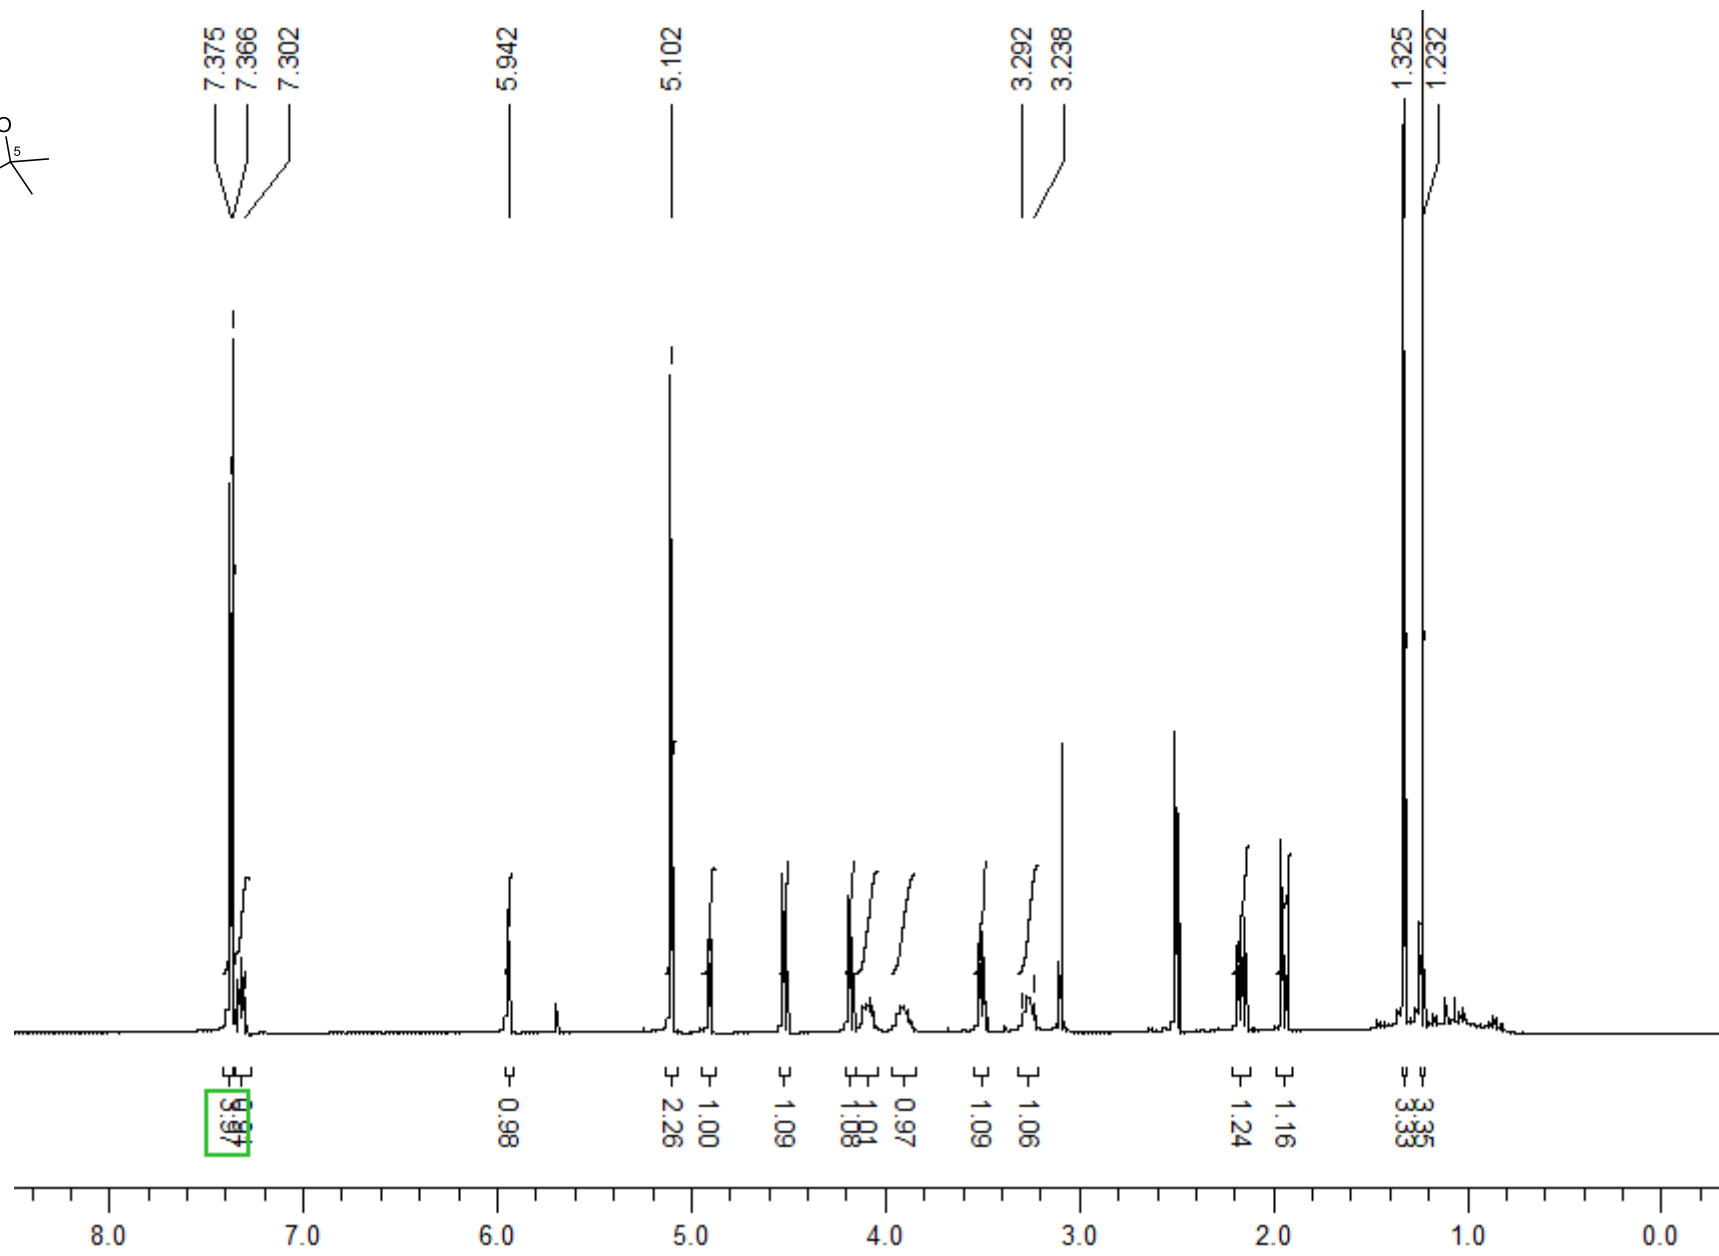

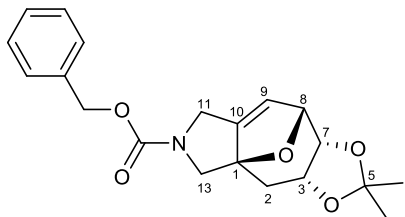

**S22**

(DMSO-d<sub>6</sub> @ 343 K)

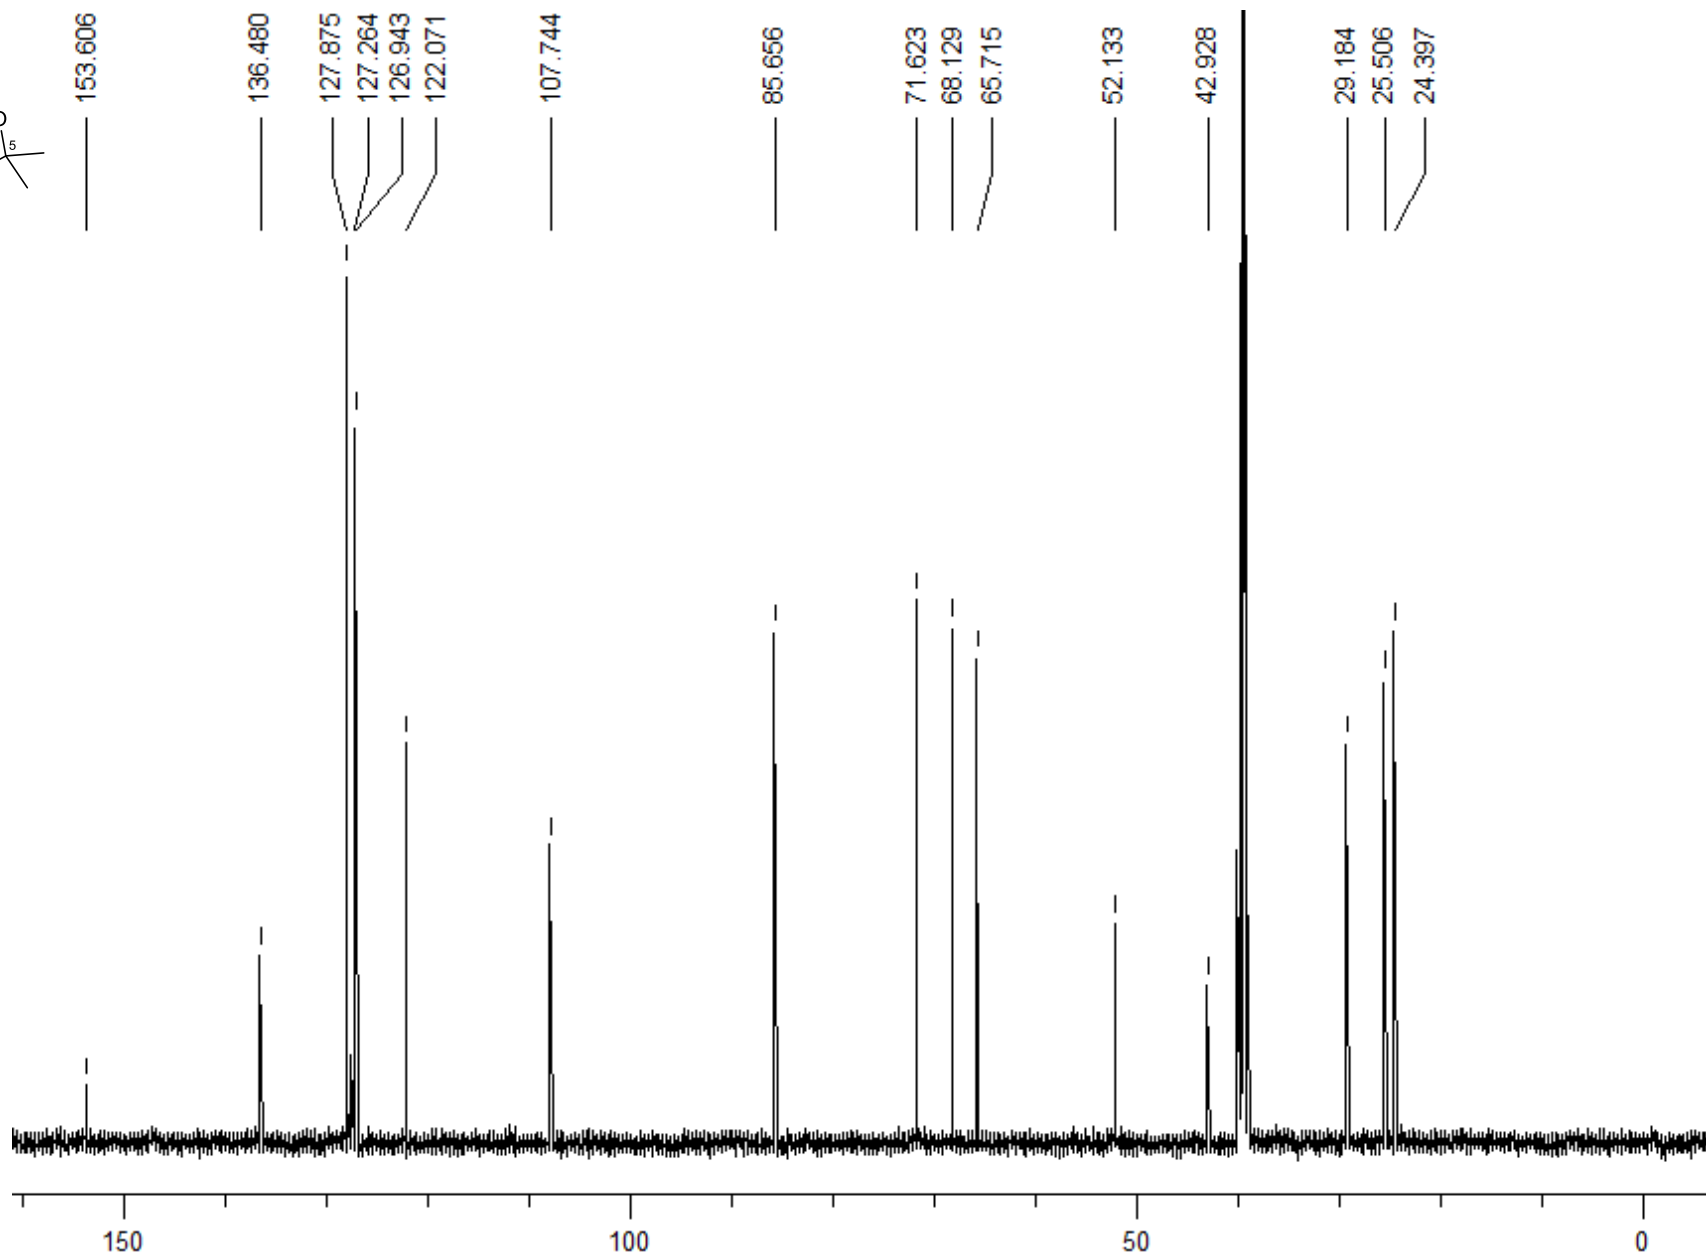

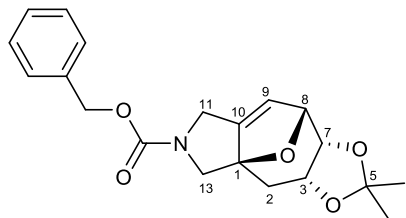

**S22**

(CDCl<sub>3</sub> @ 300 K)

148.037  
147.345

90.056  
89.265

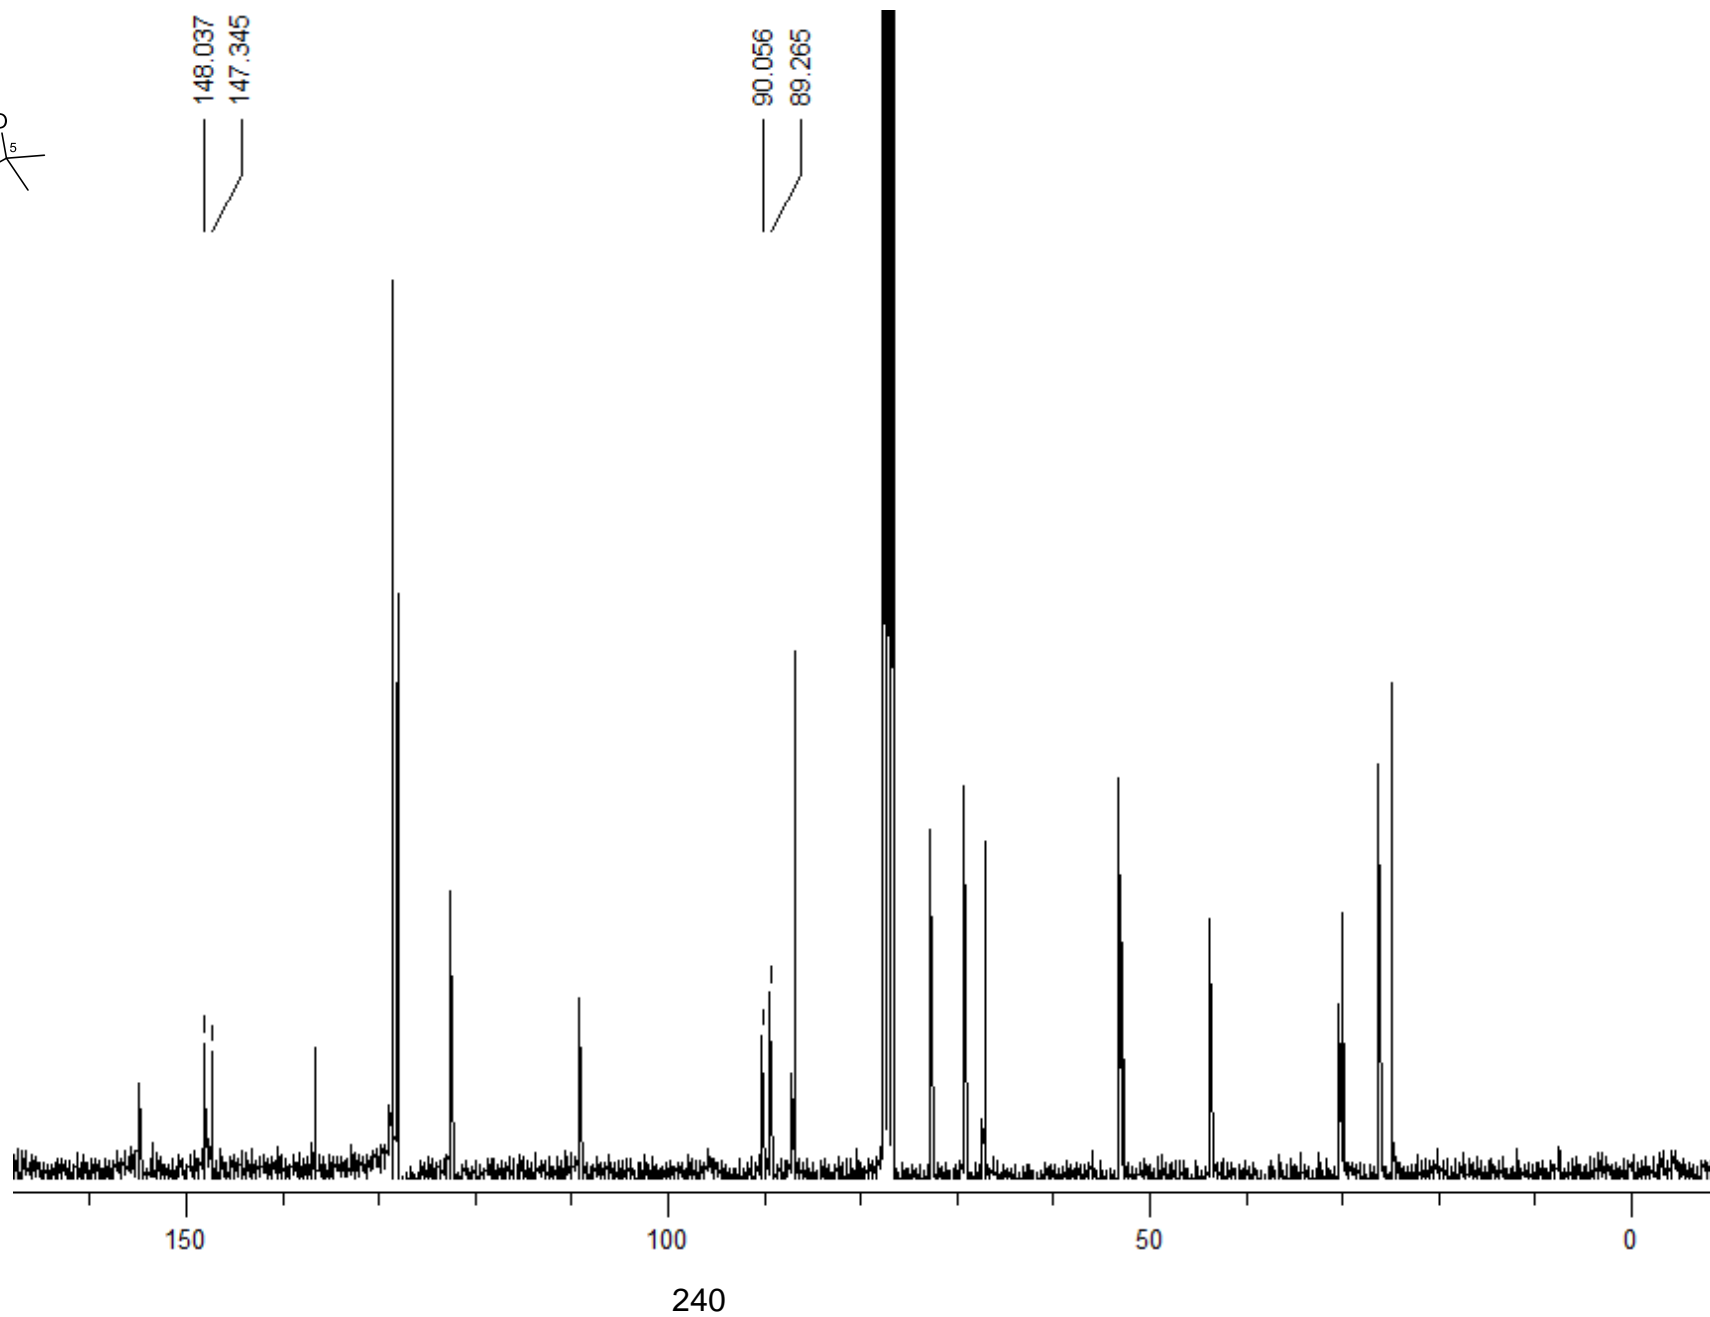

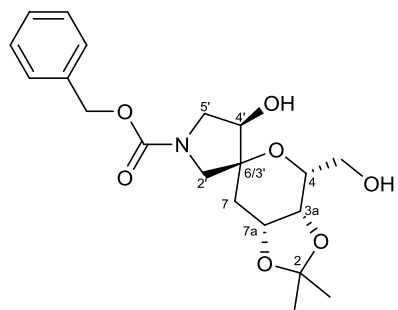

**3**  
(CD<sub>3</sub>OD @ 333 K)

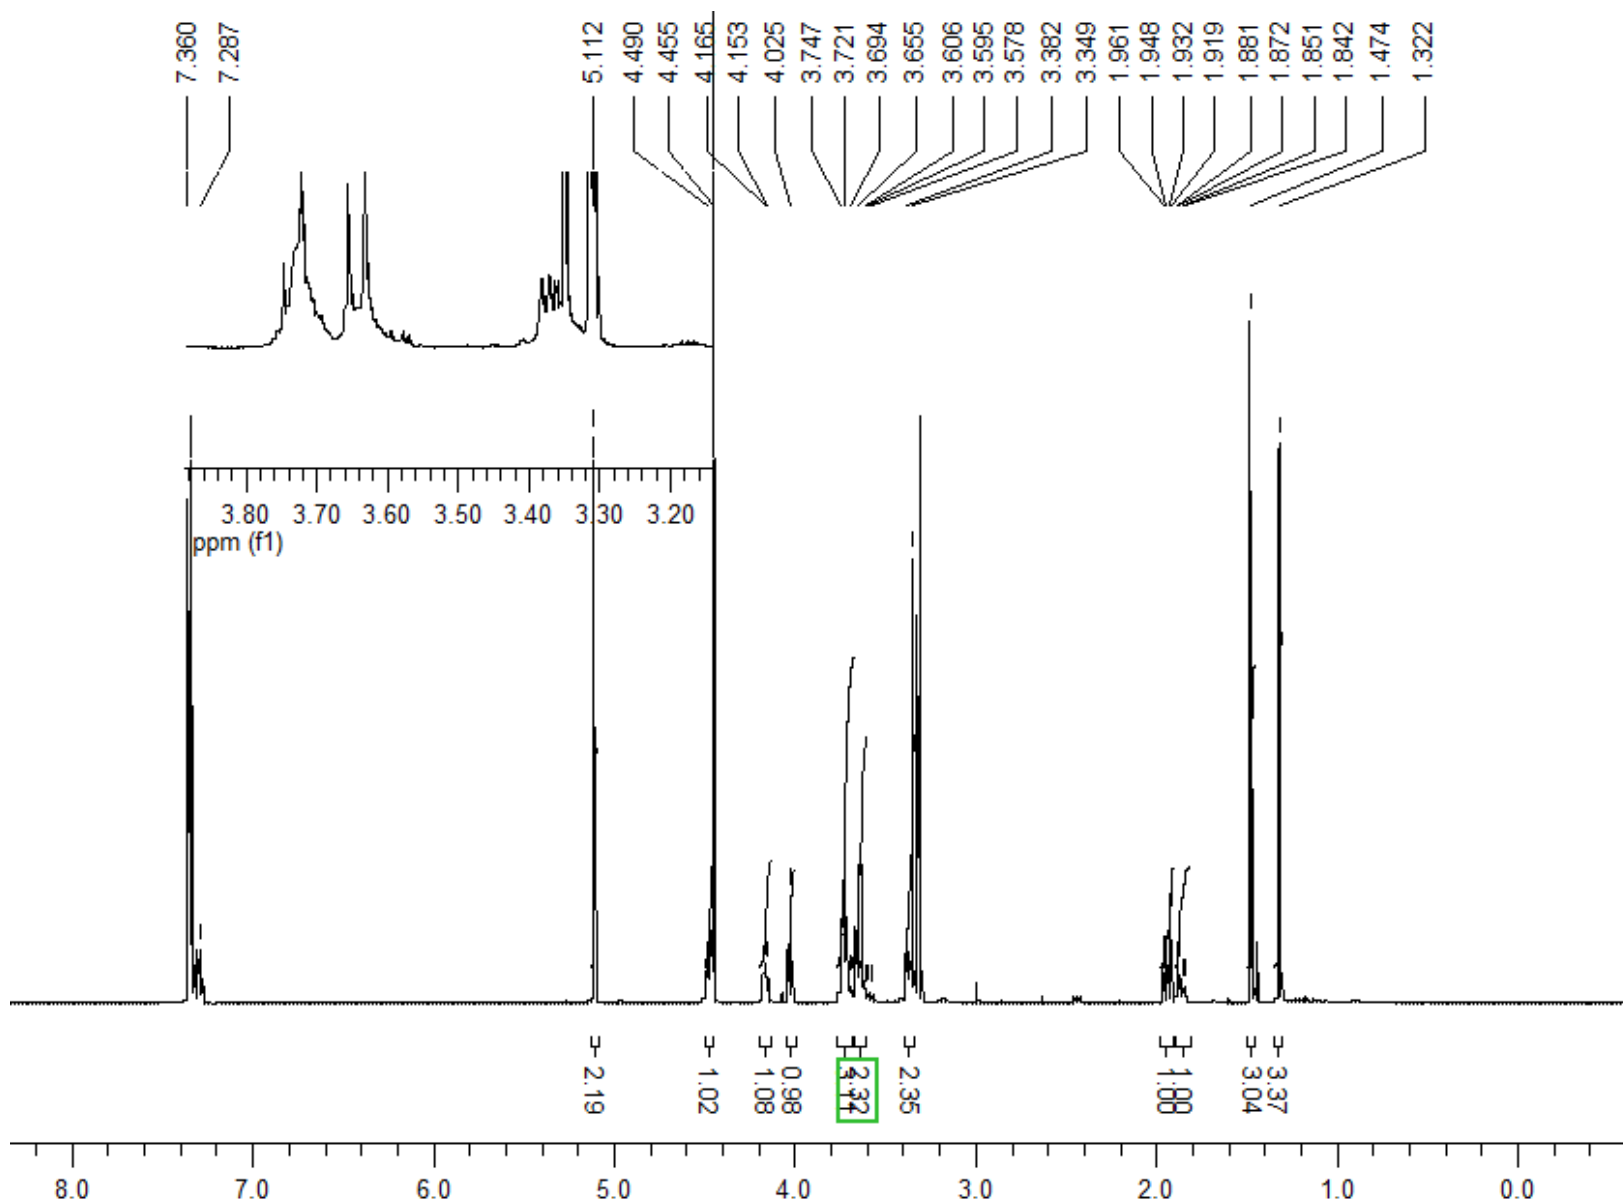

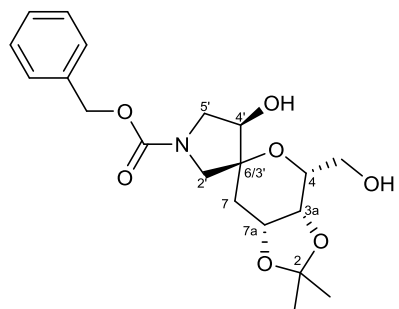

**3**  
(CD<sub>3</sub>OD @ 333 K)

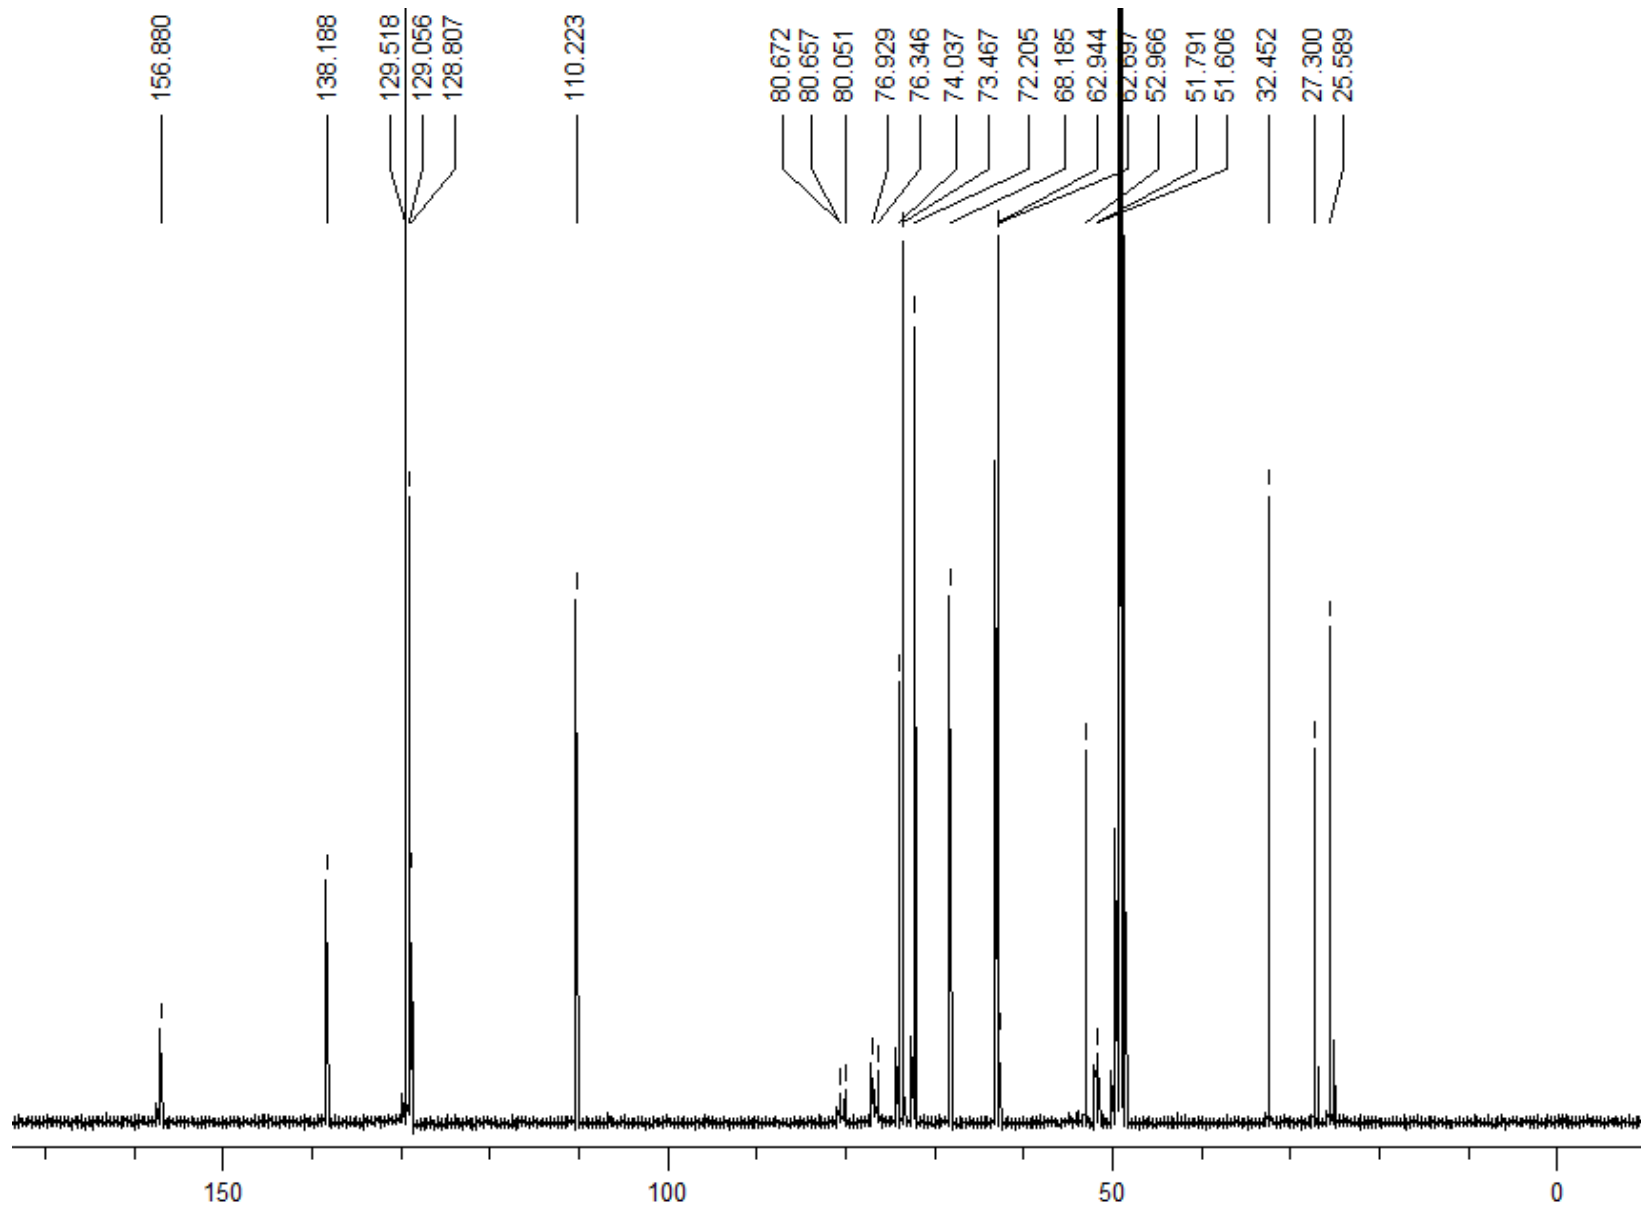

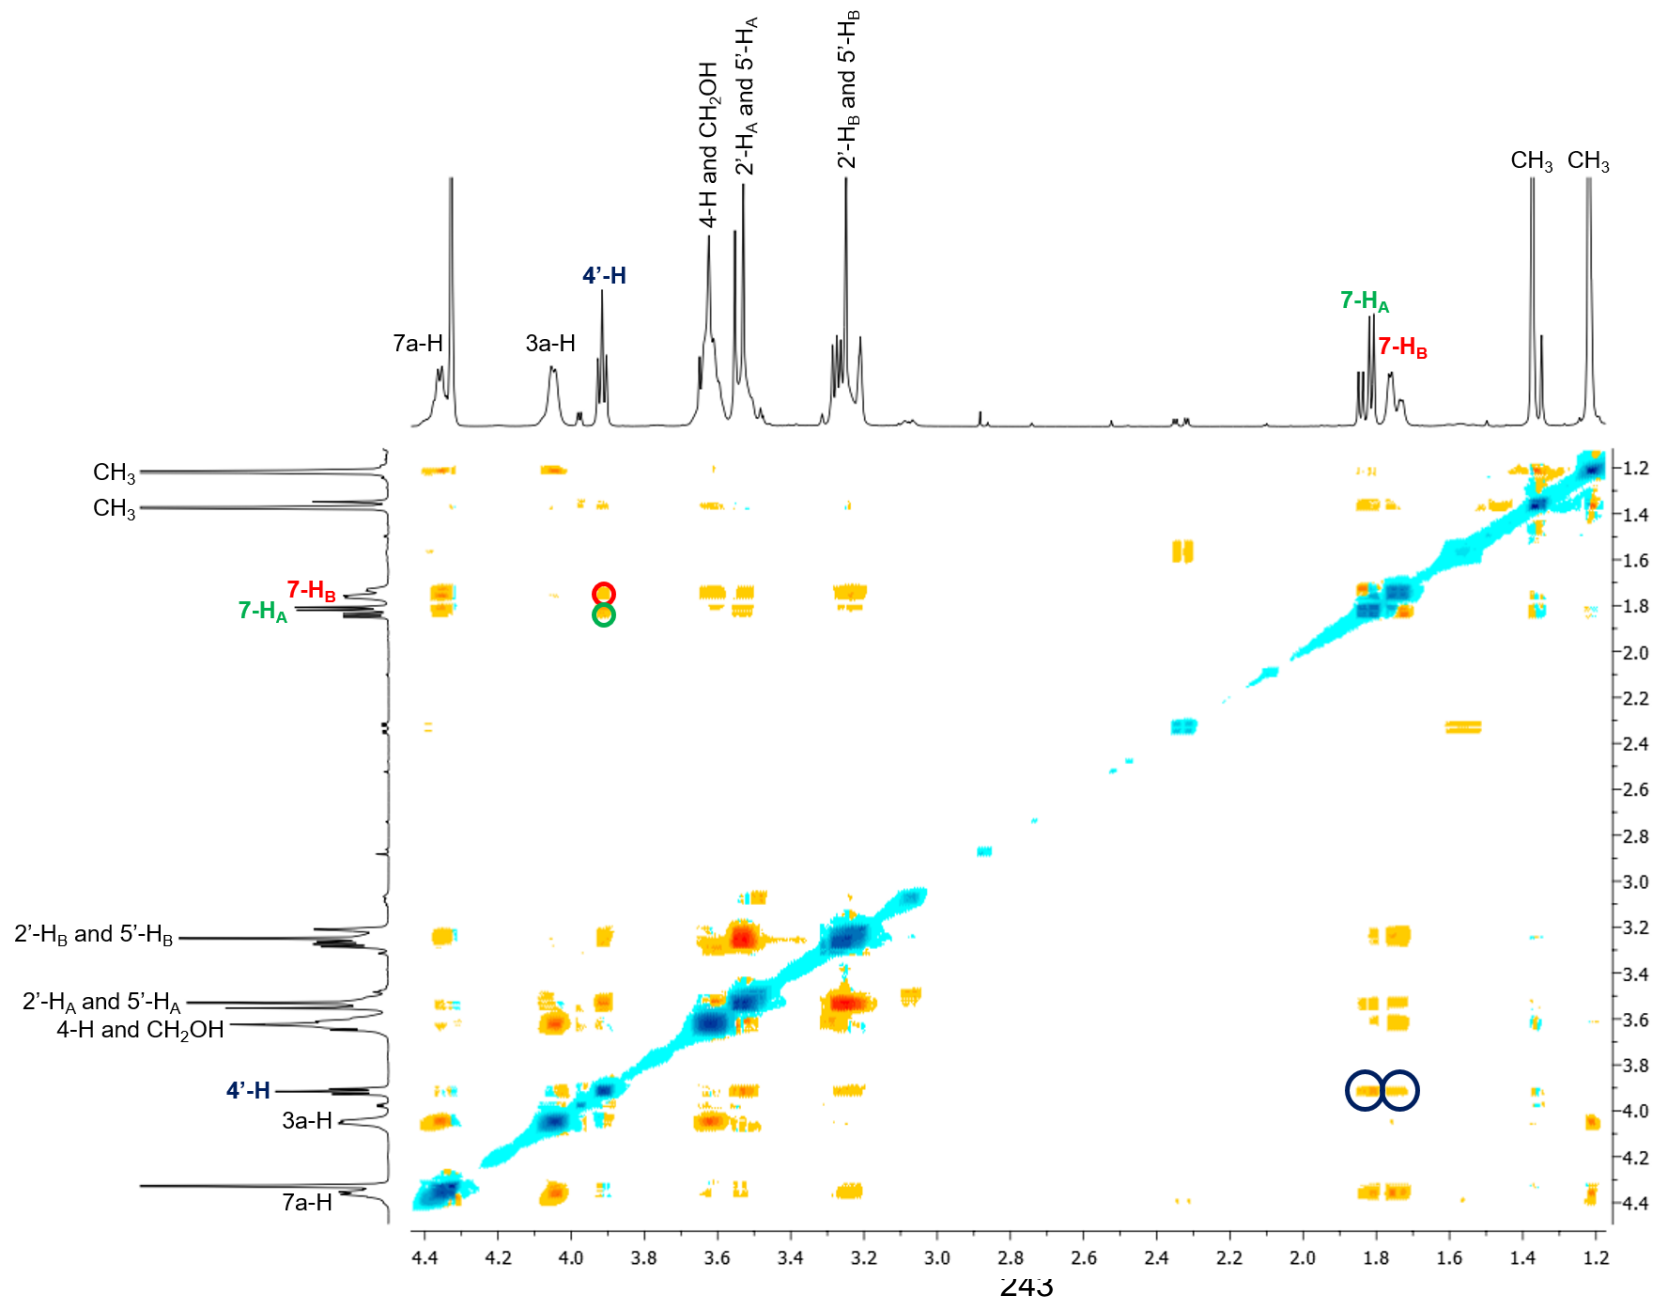

**3 NOESY correlations:**

**4'-H:** 7-H<sub>A</sub> and 7-H<sub>B</sub>

**7-H<sub>A</sub>:** 4'-H

**7-H<sub>B</sub>:** 4'-H

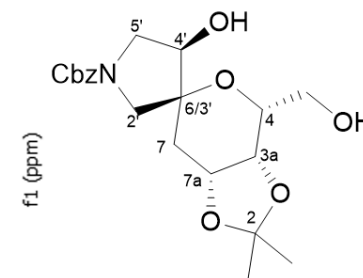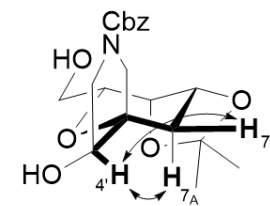

**key observed nOe enhancements**



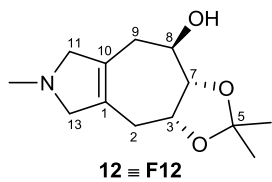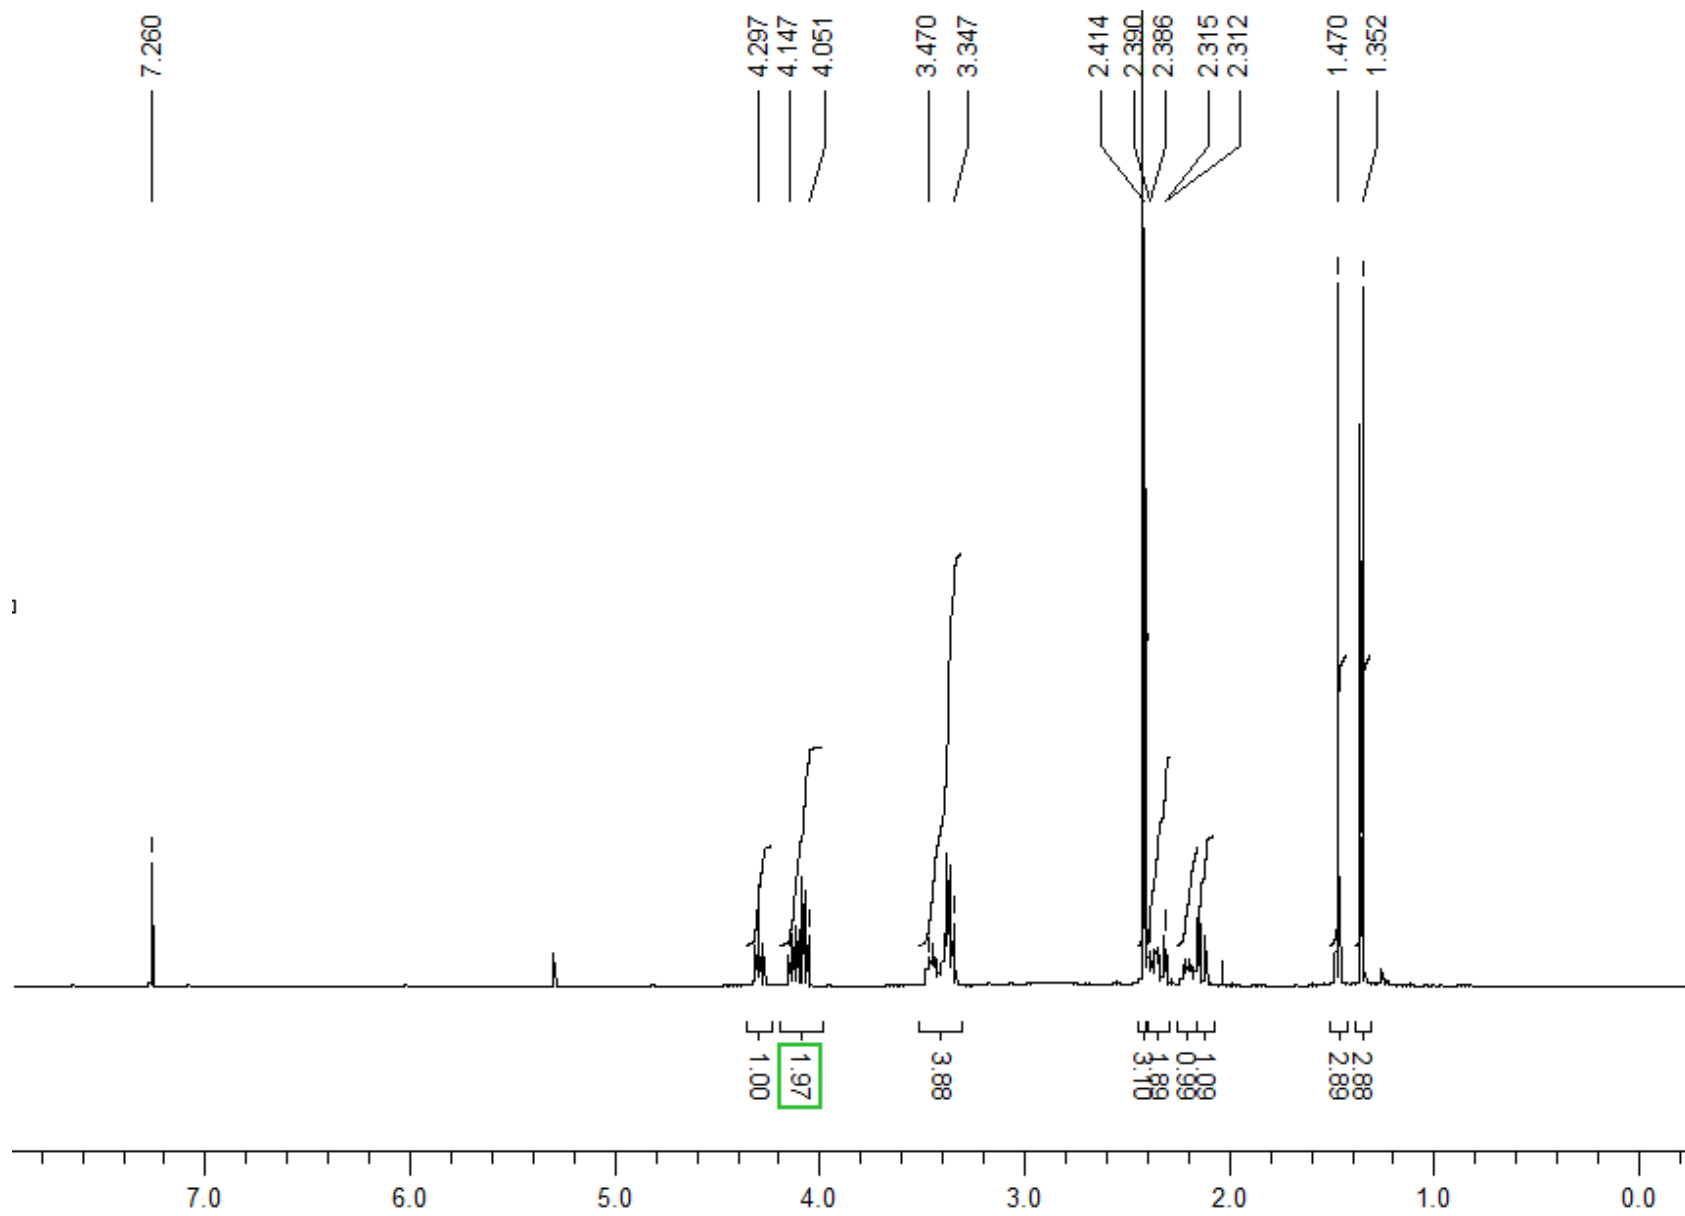

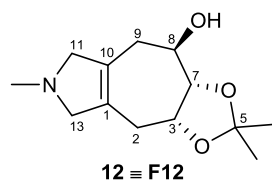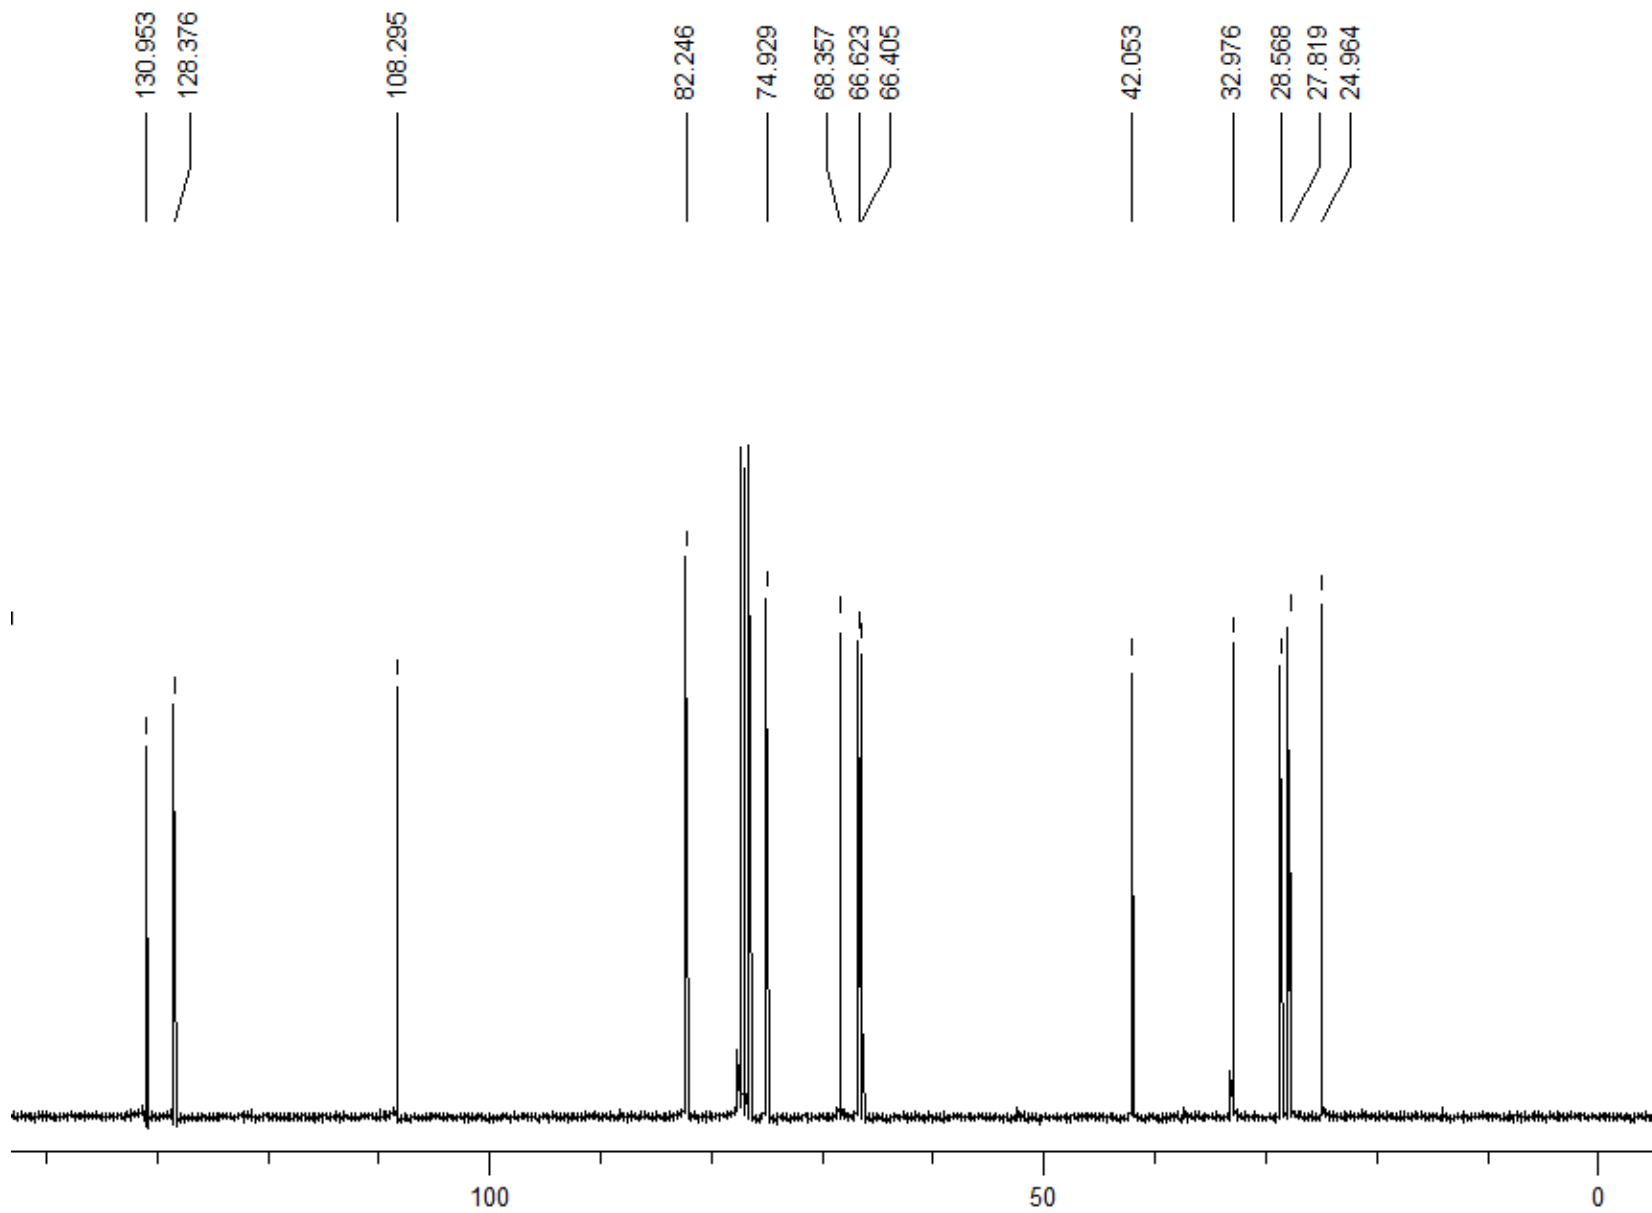

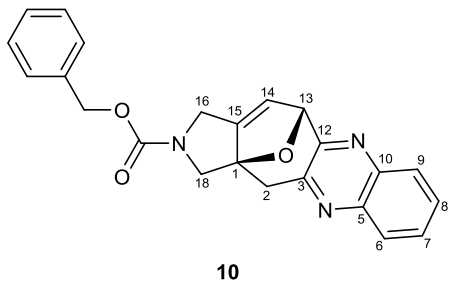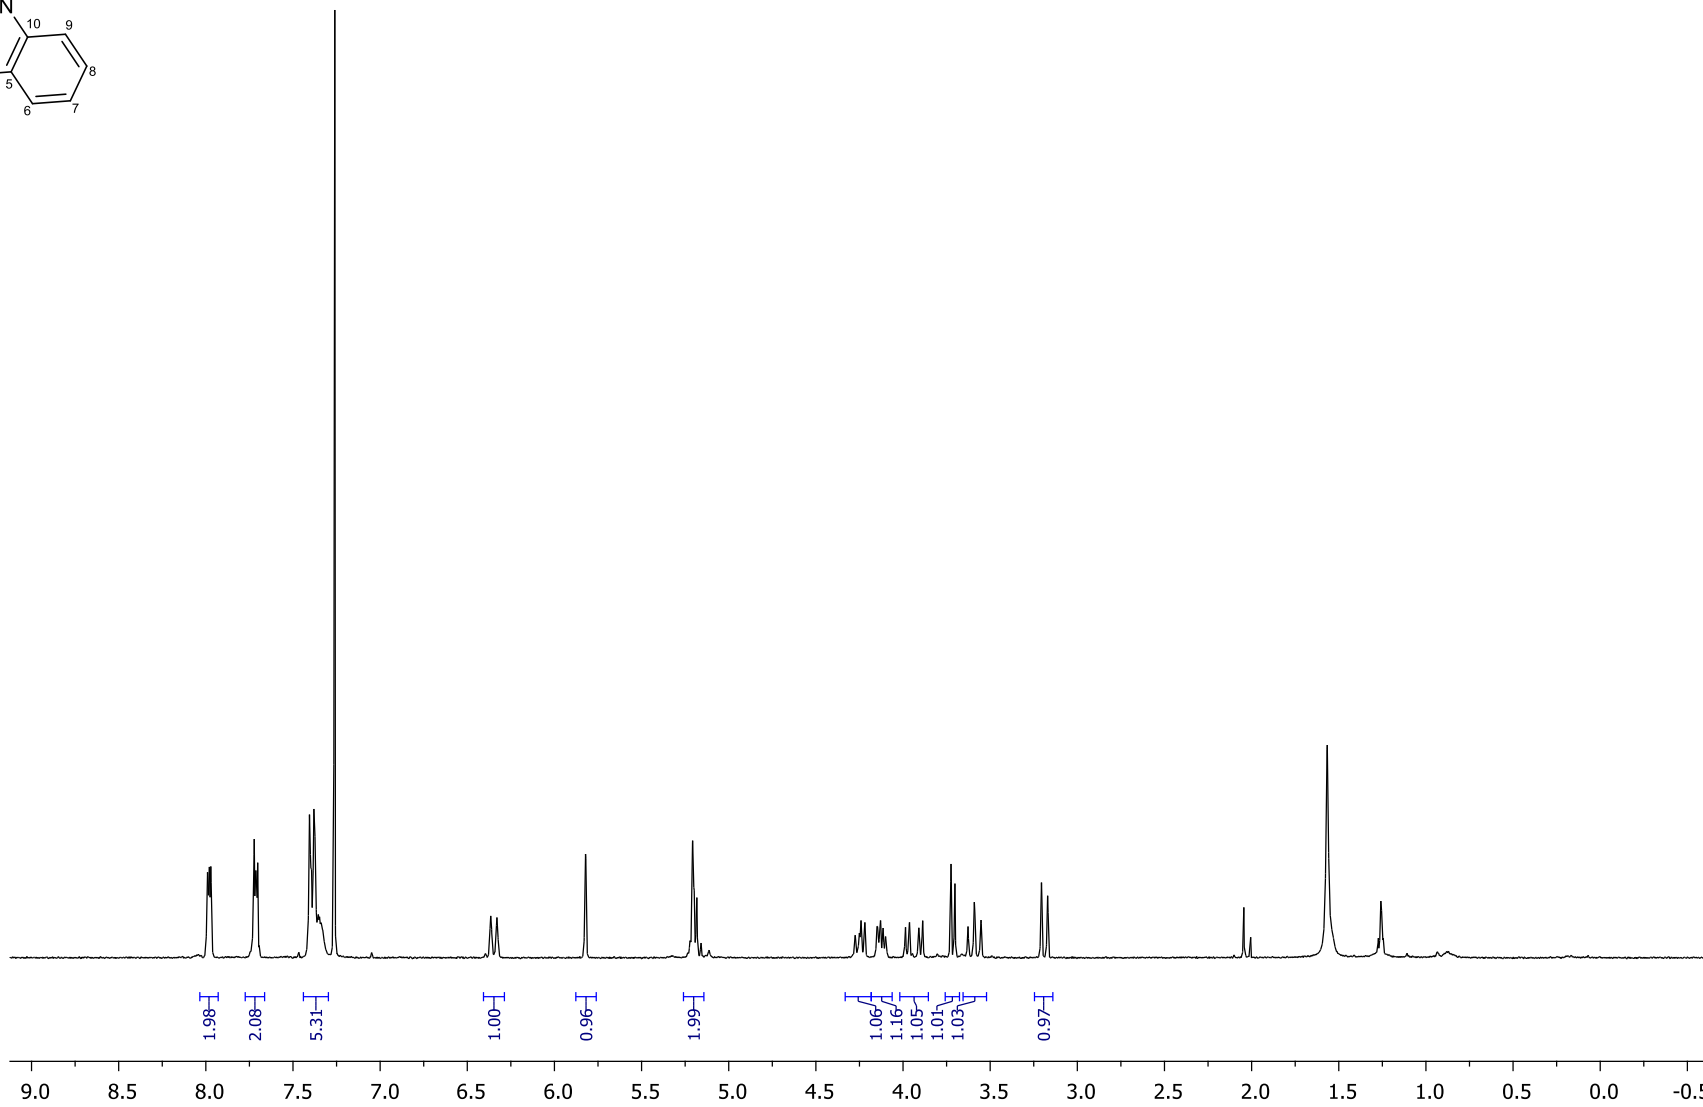

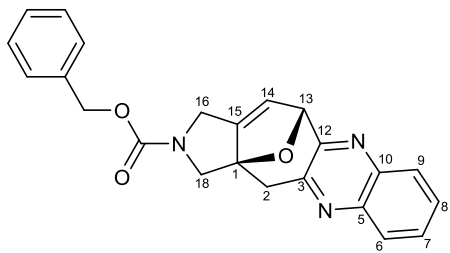

10

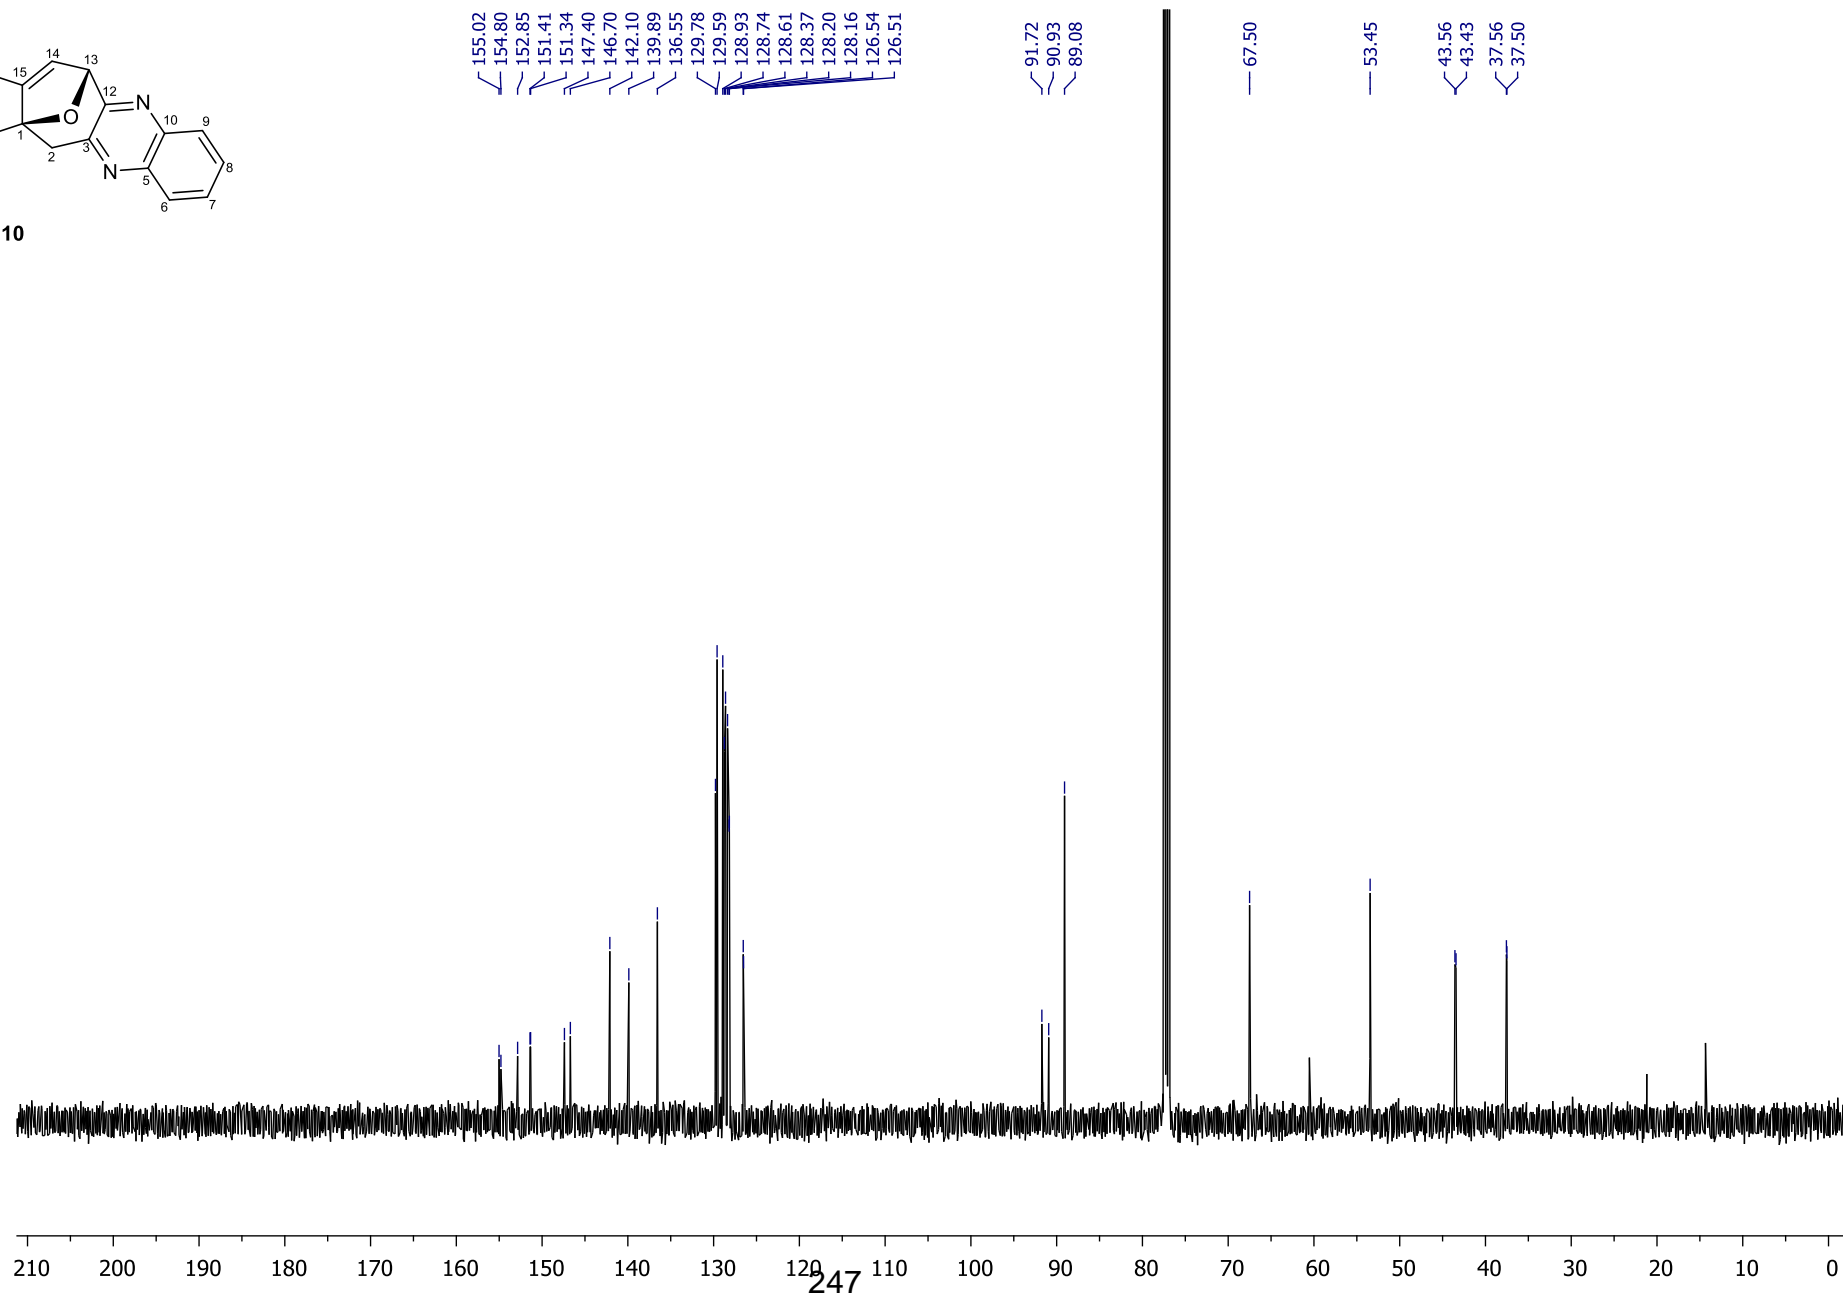

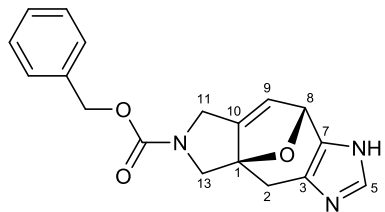

11

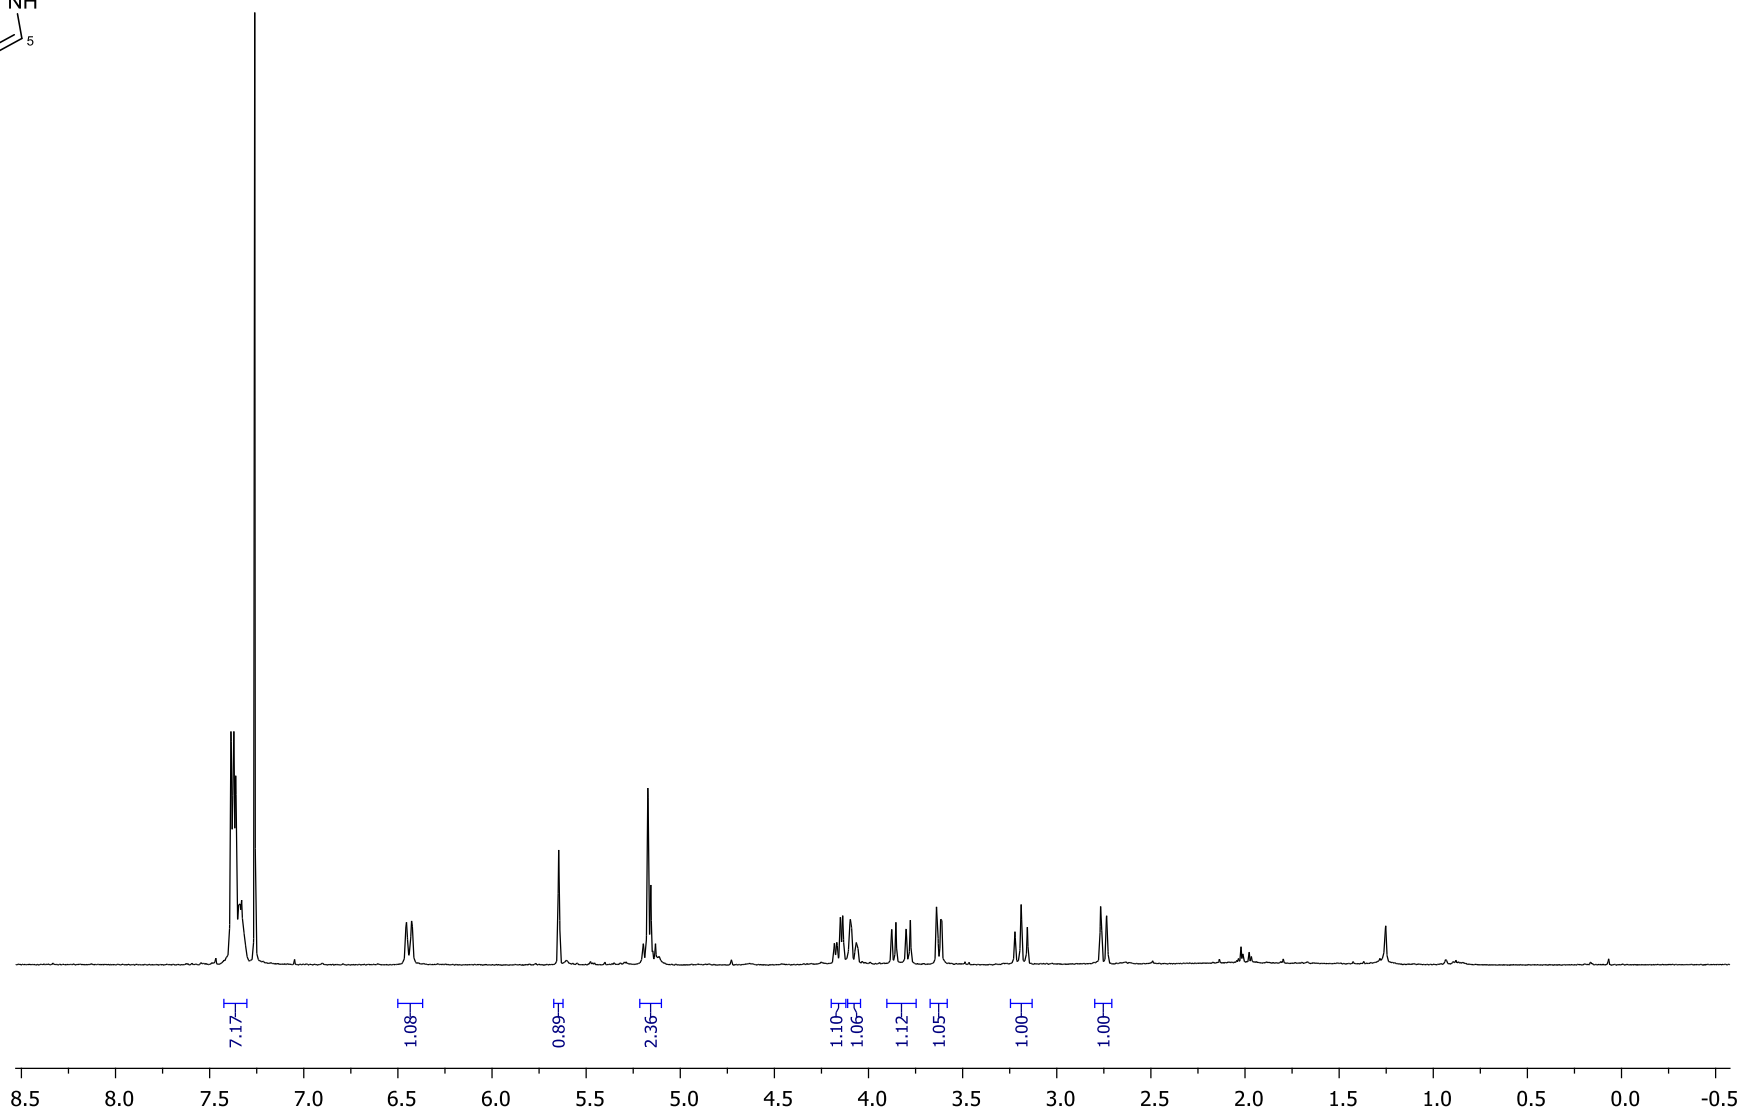

248

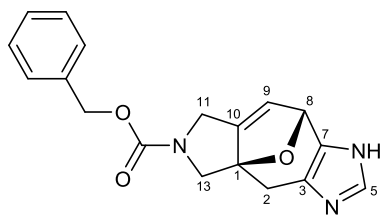

11

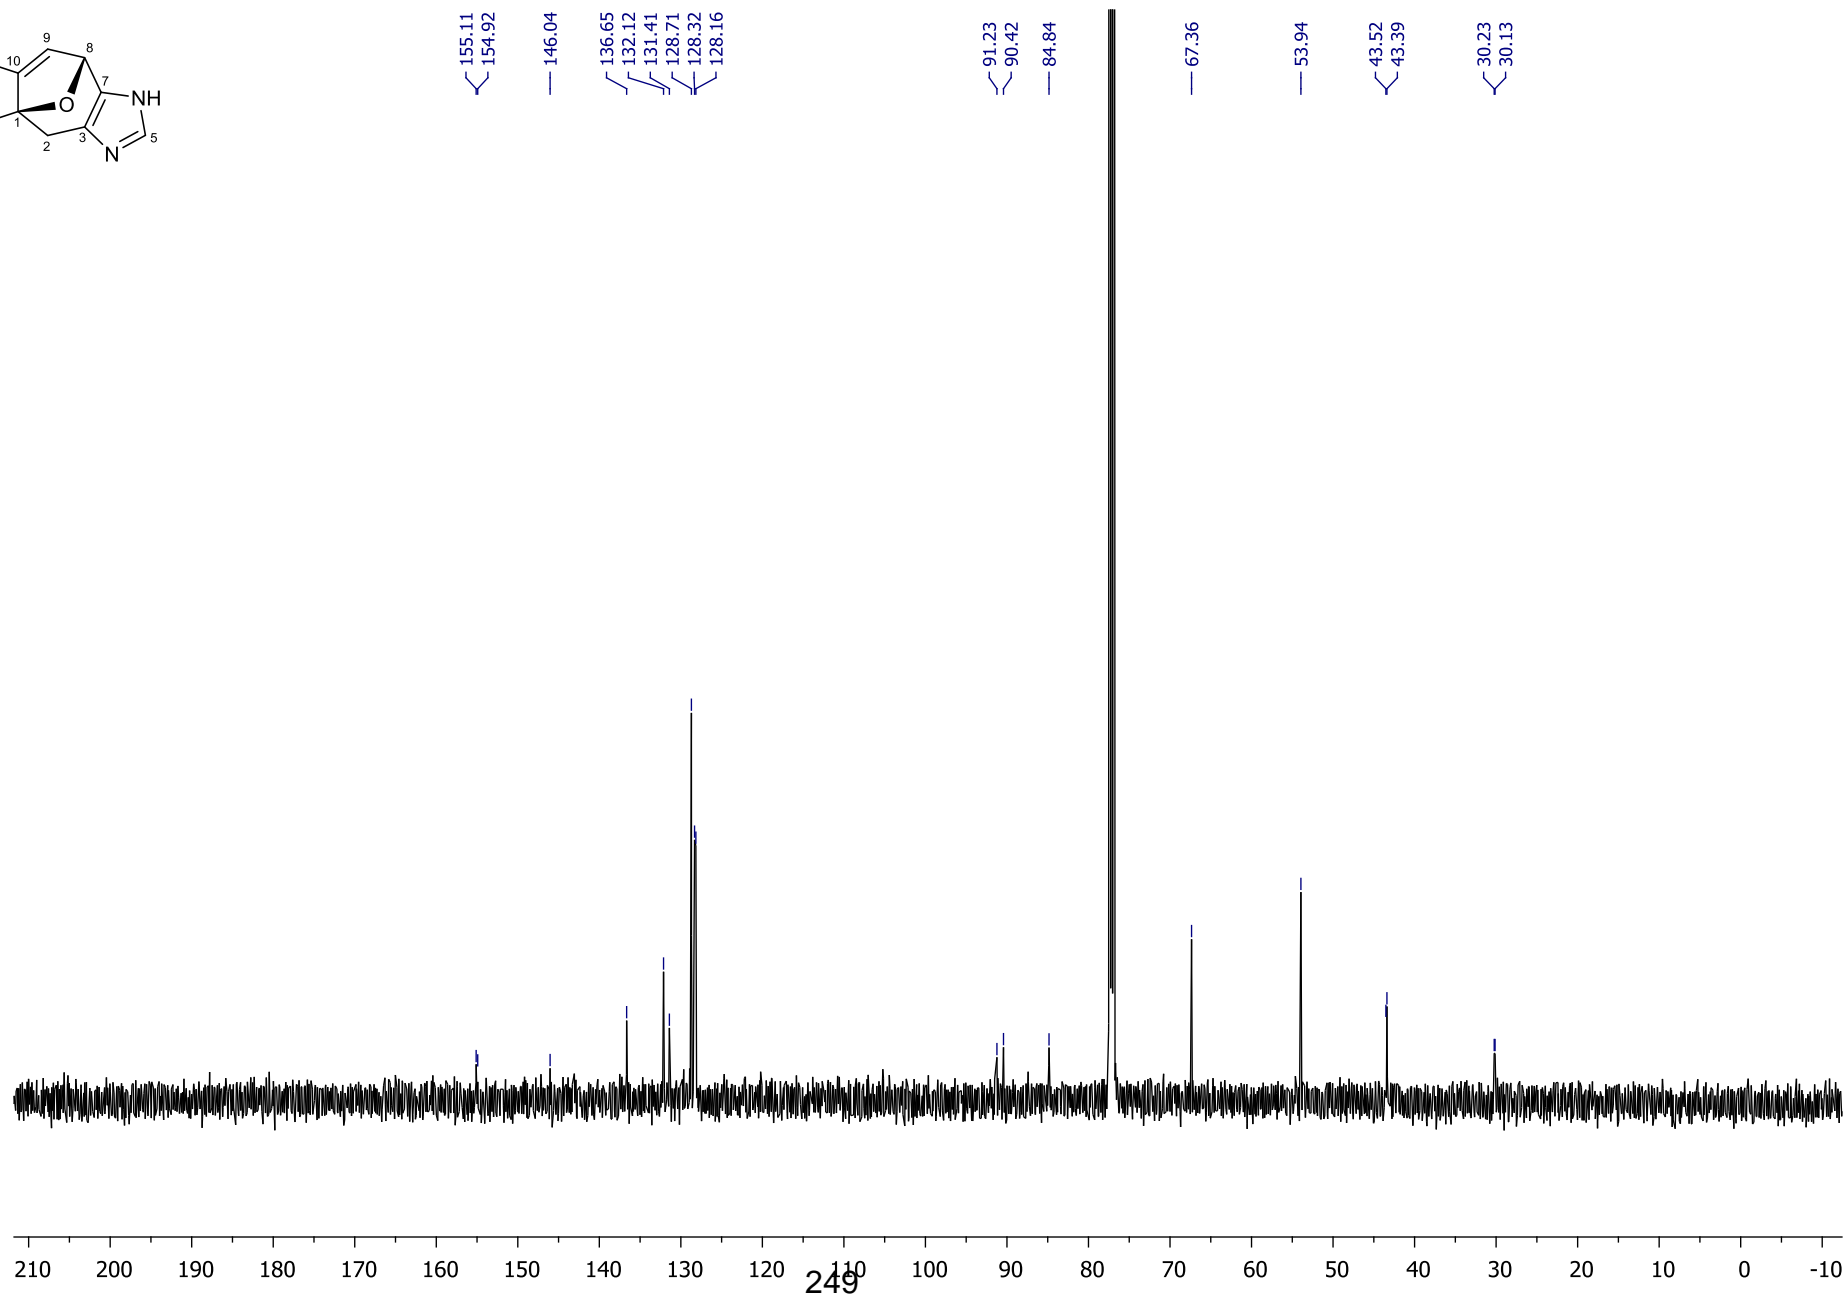

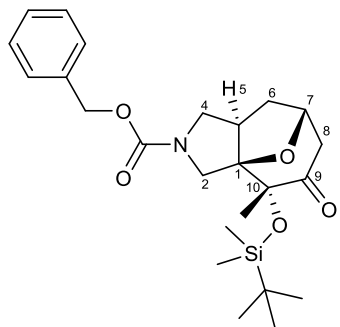

S23

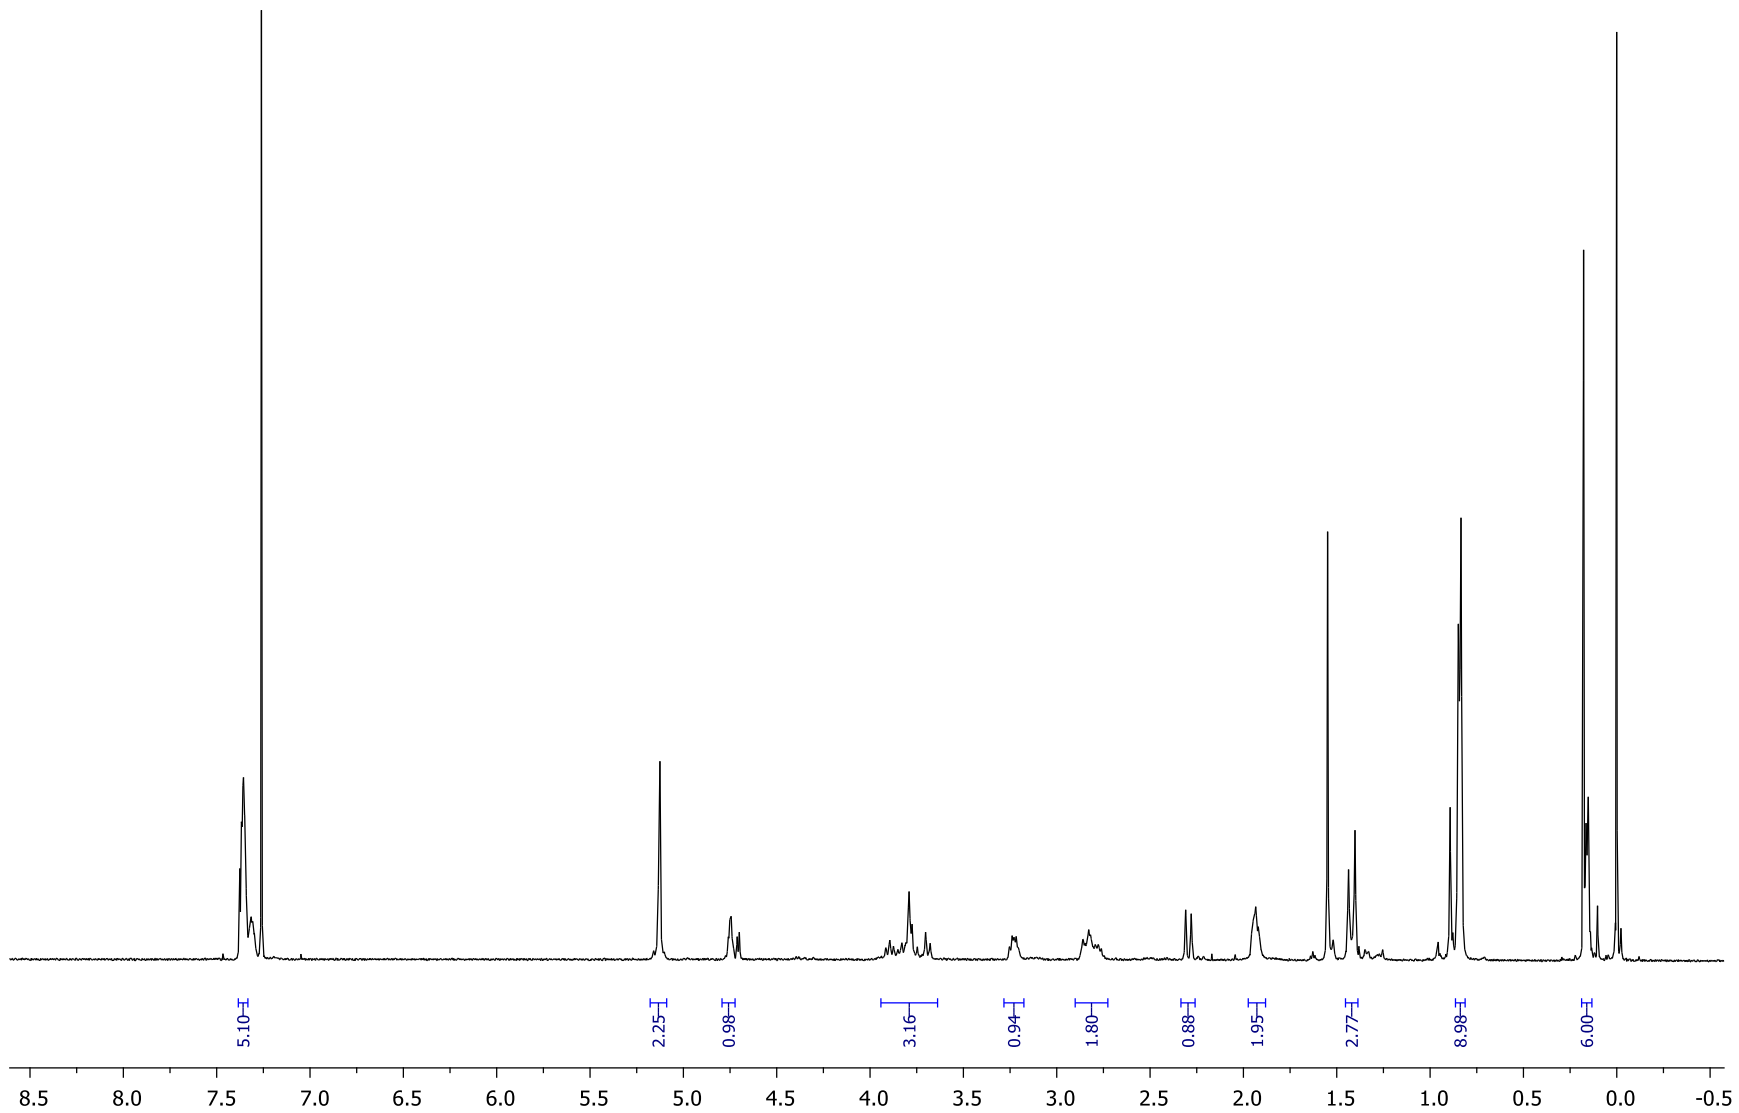

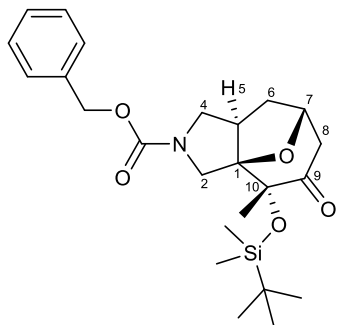

S23

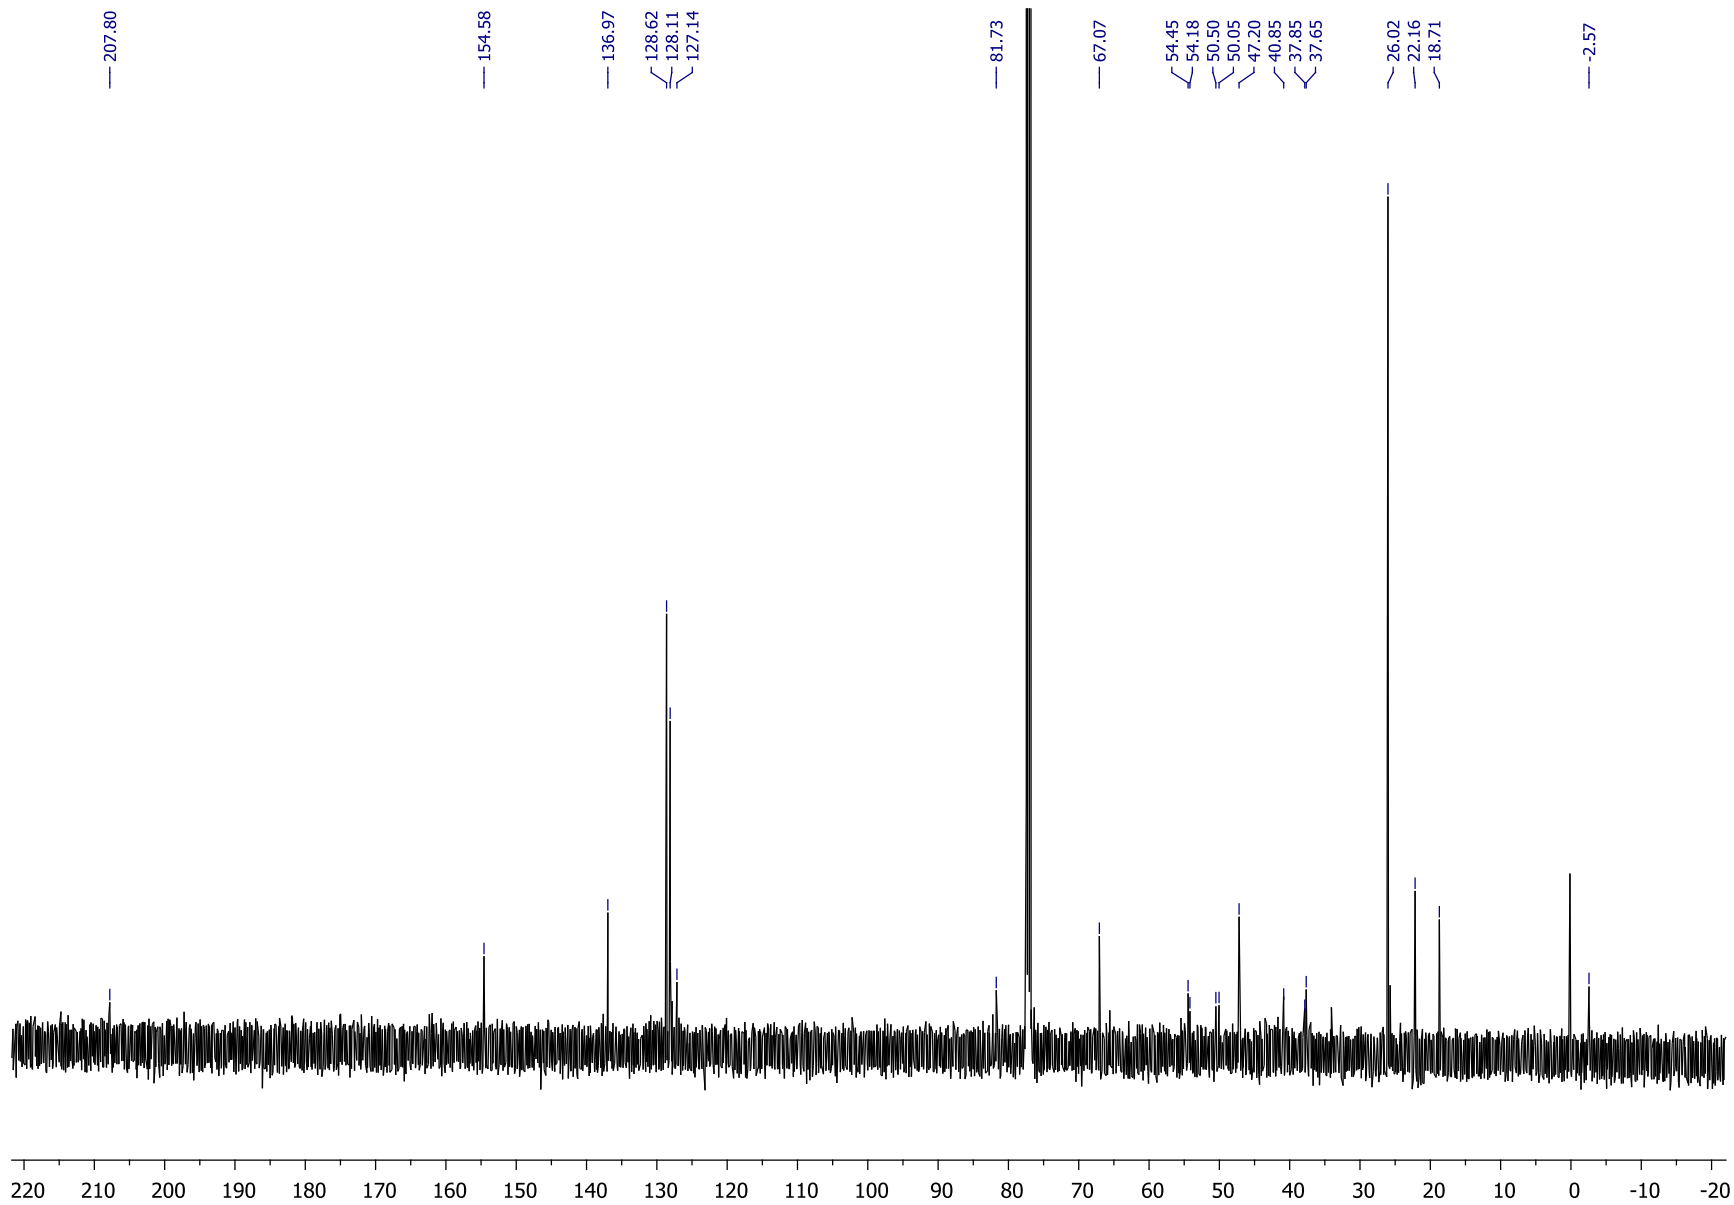



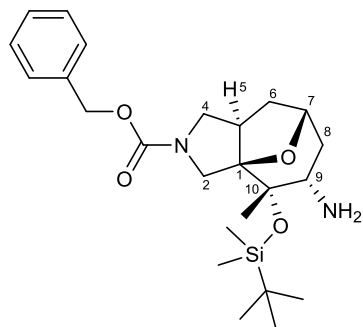

13

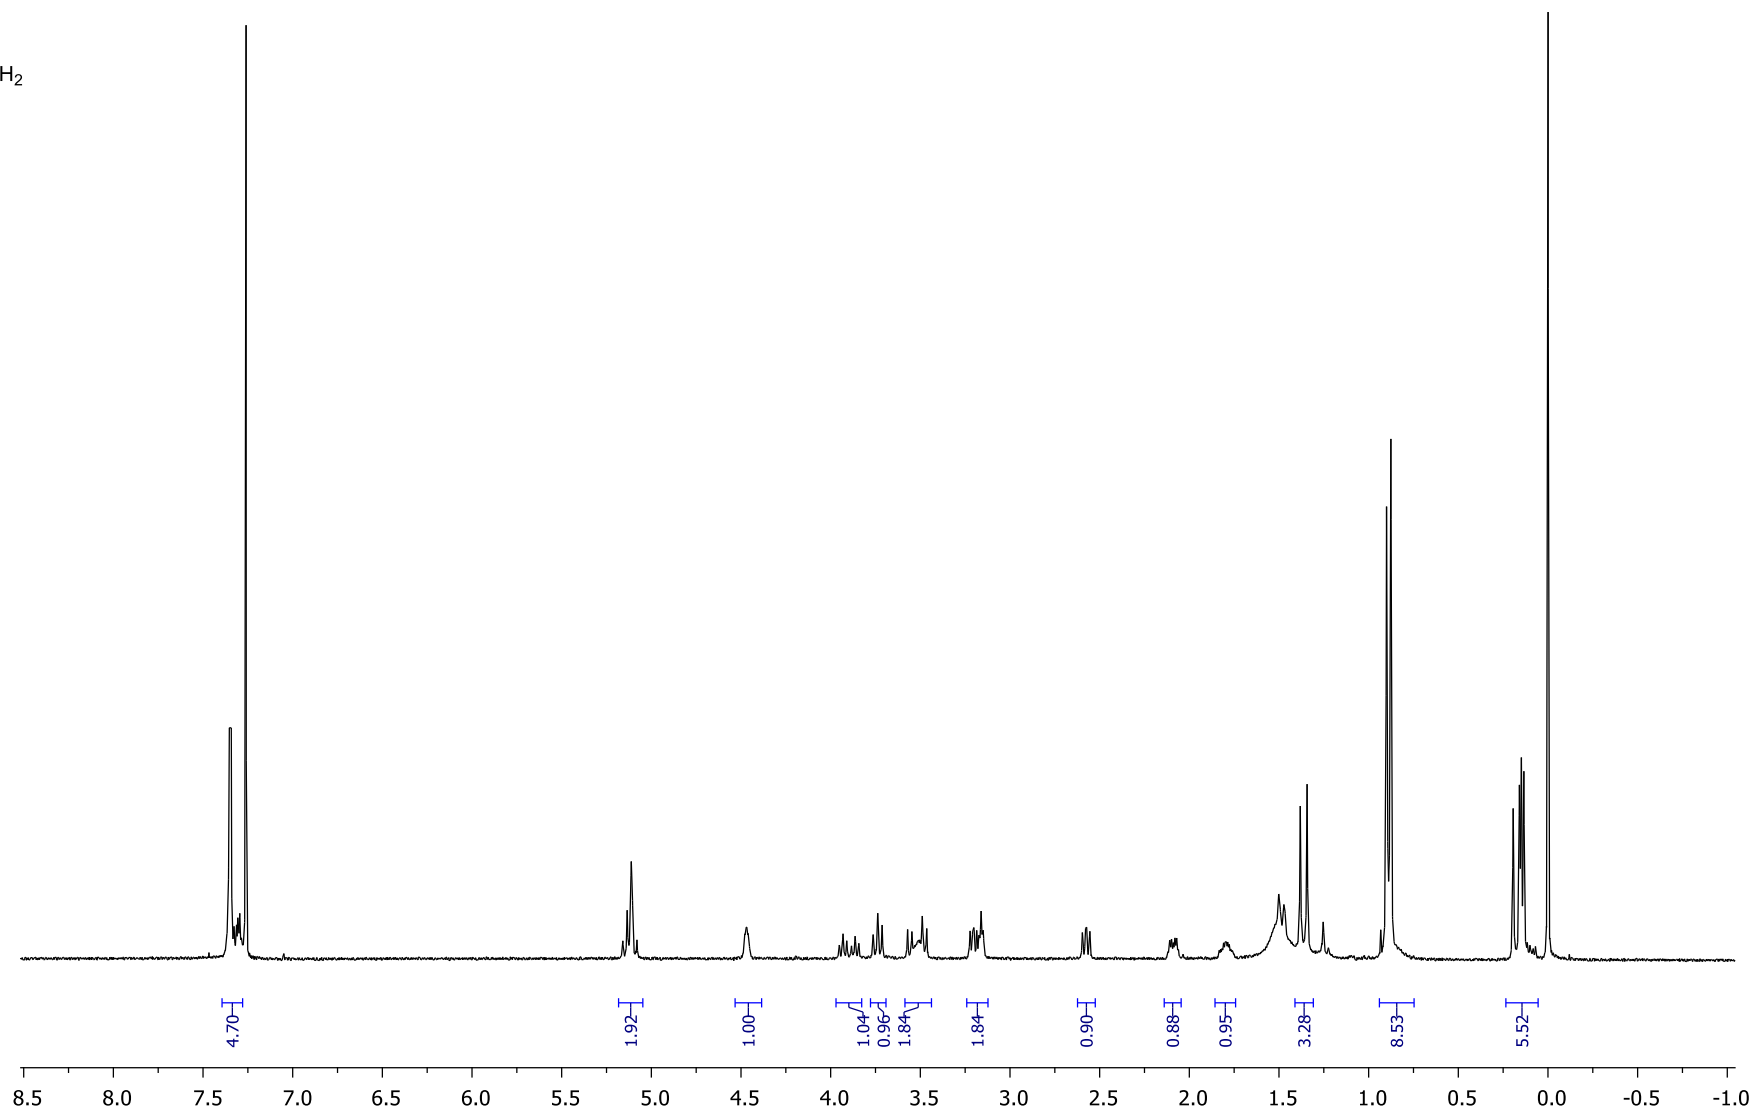

252

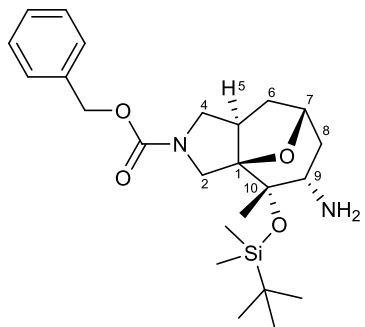

13

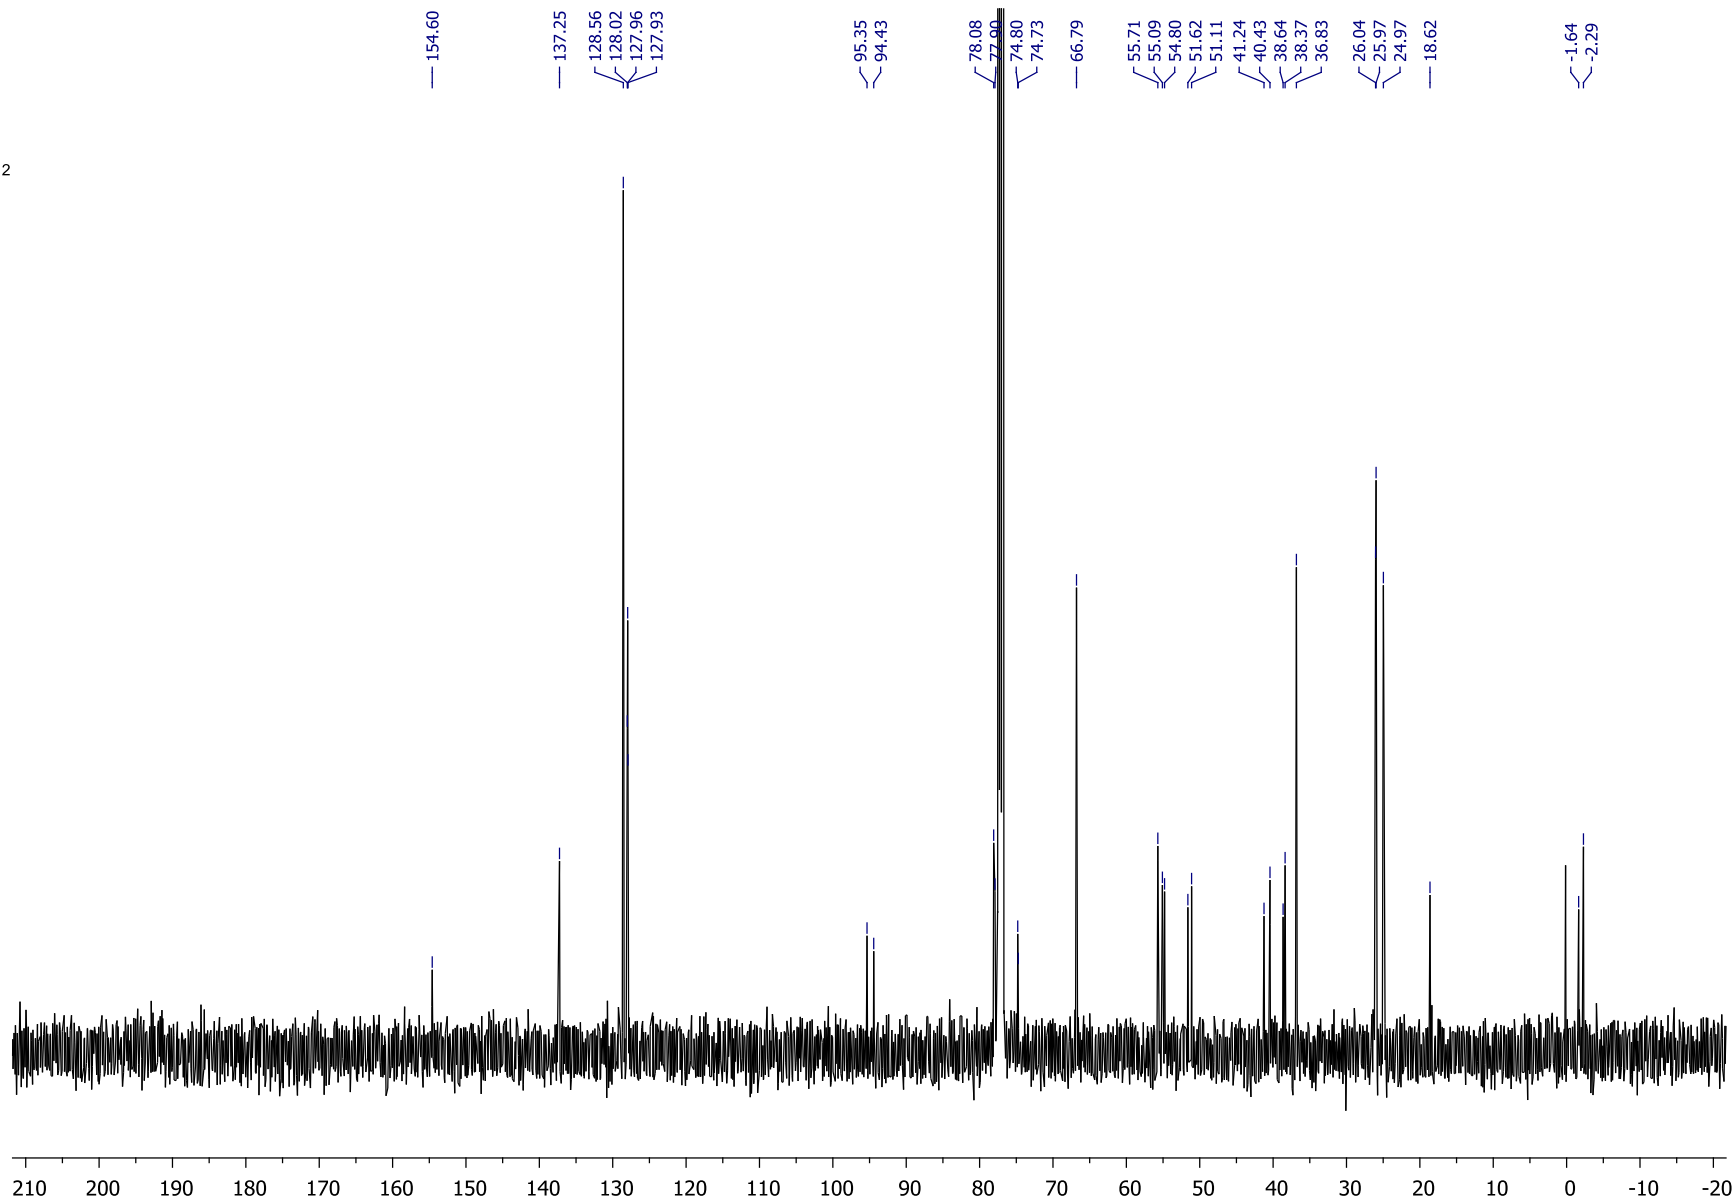

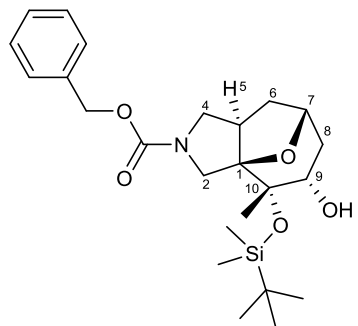

S24

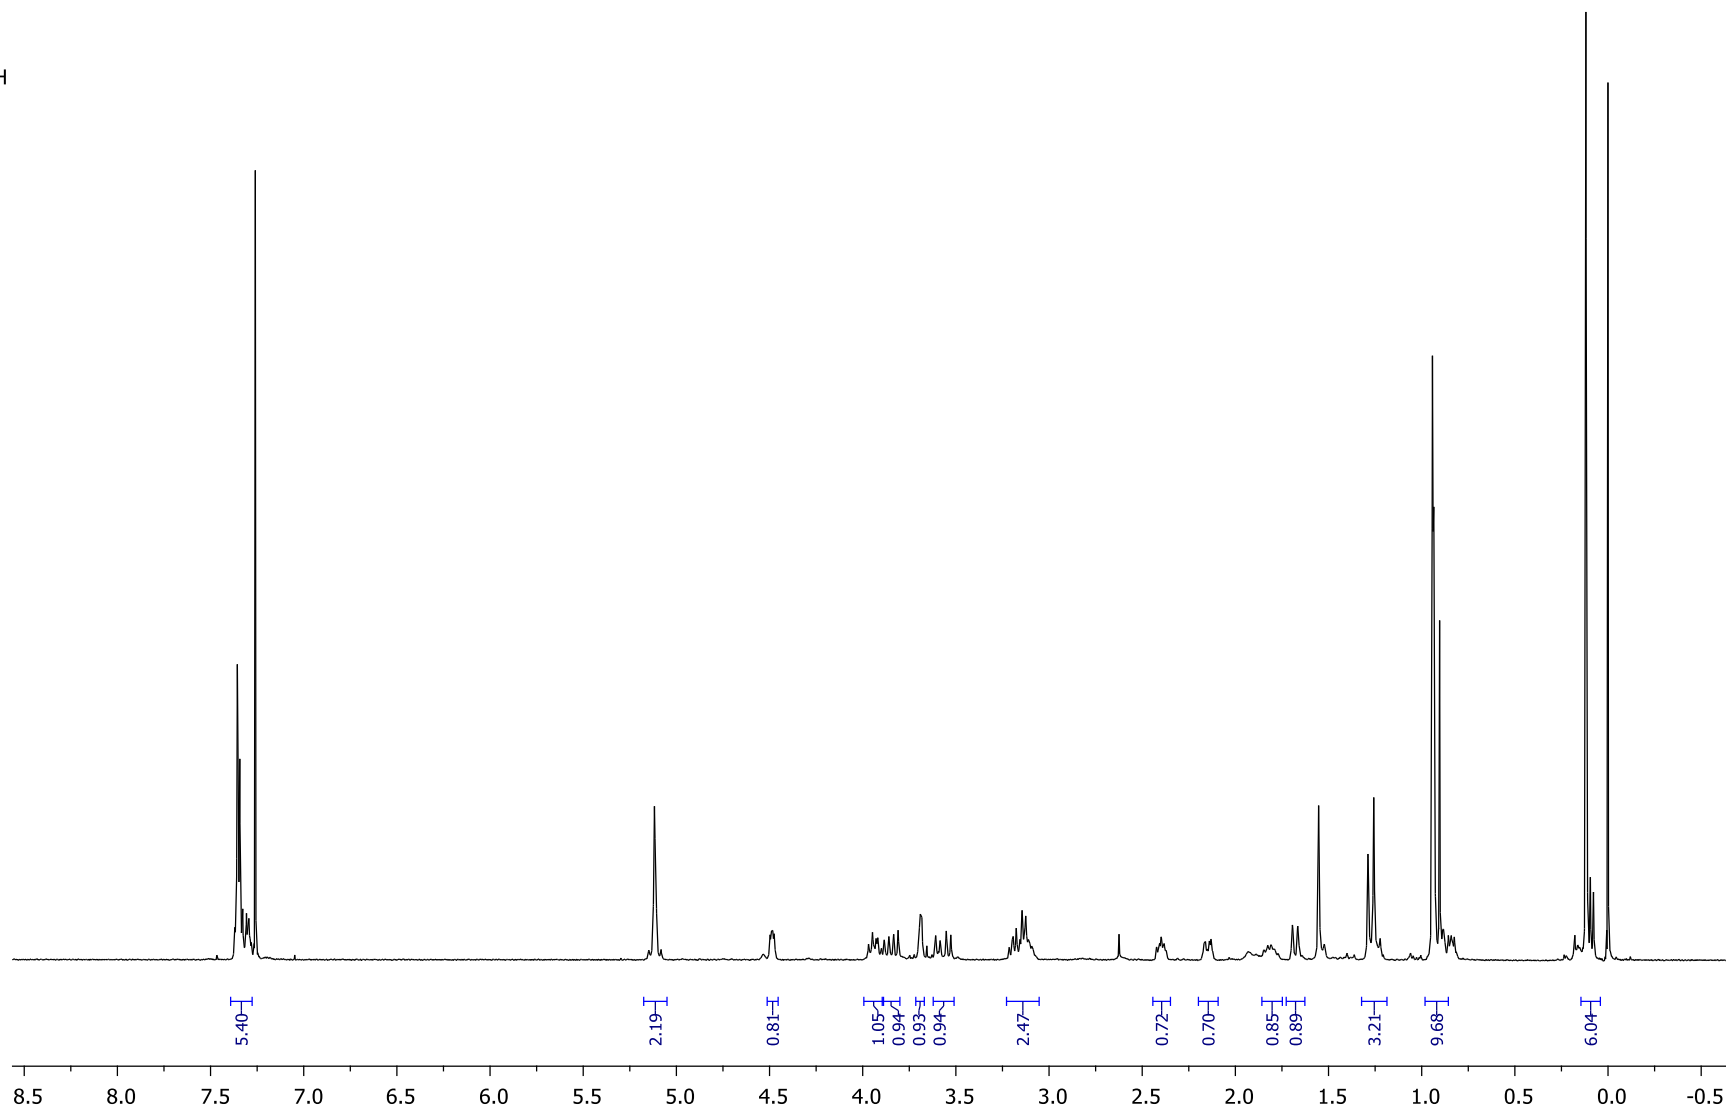

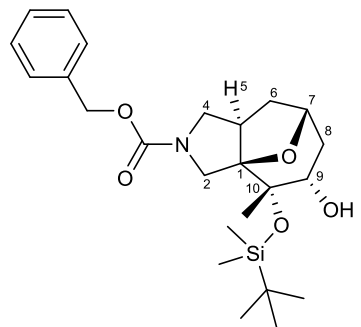

S24

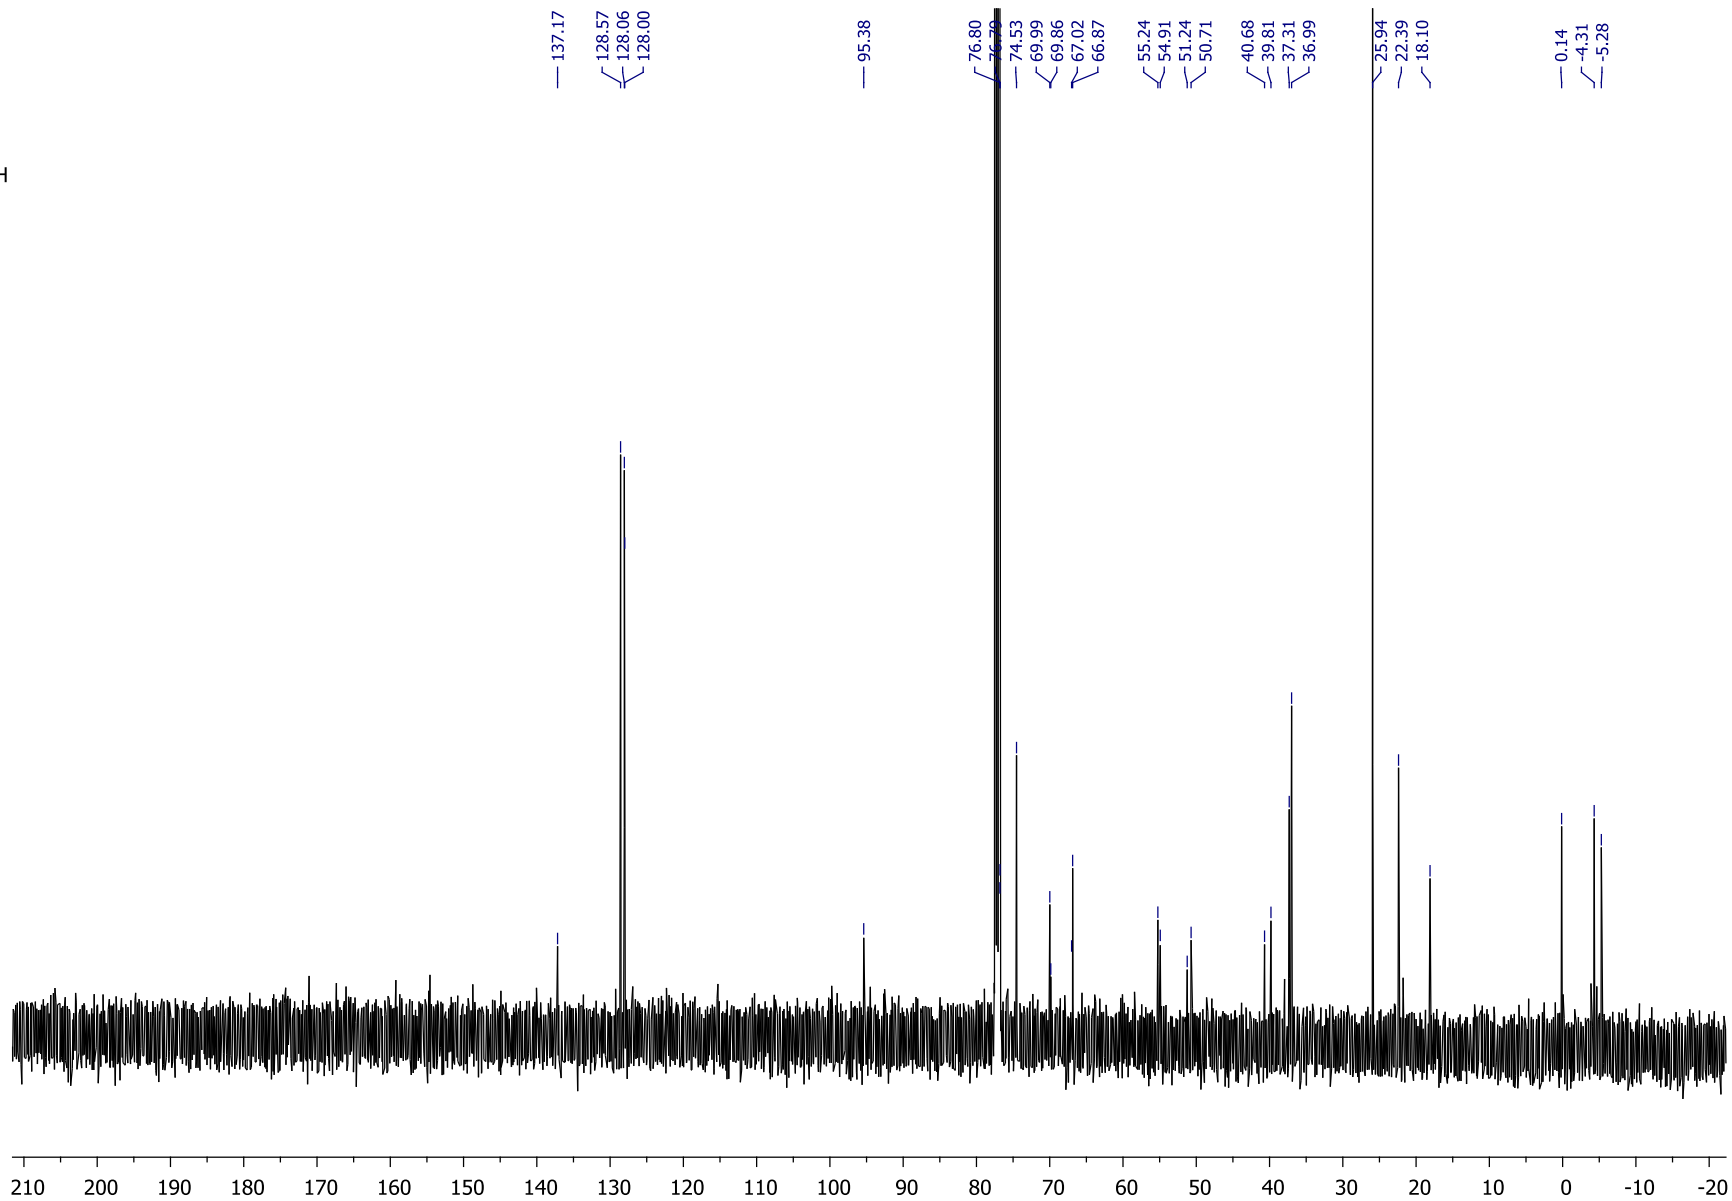

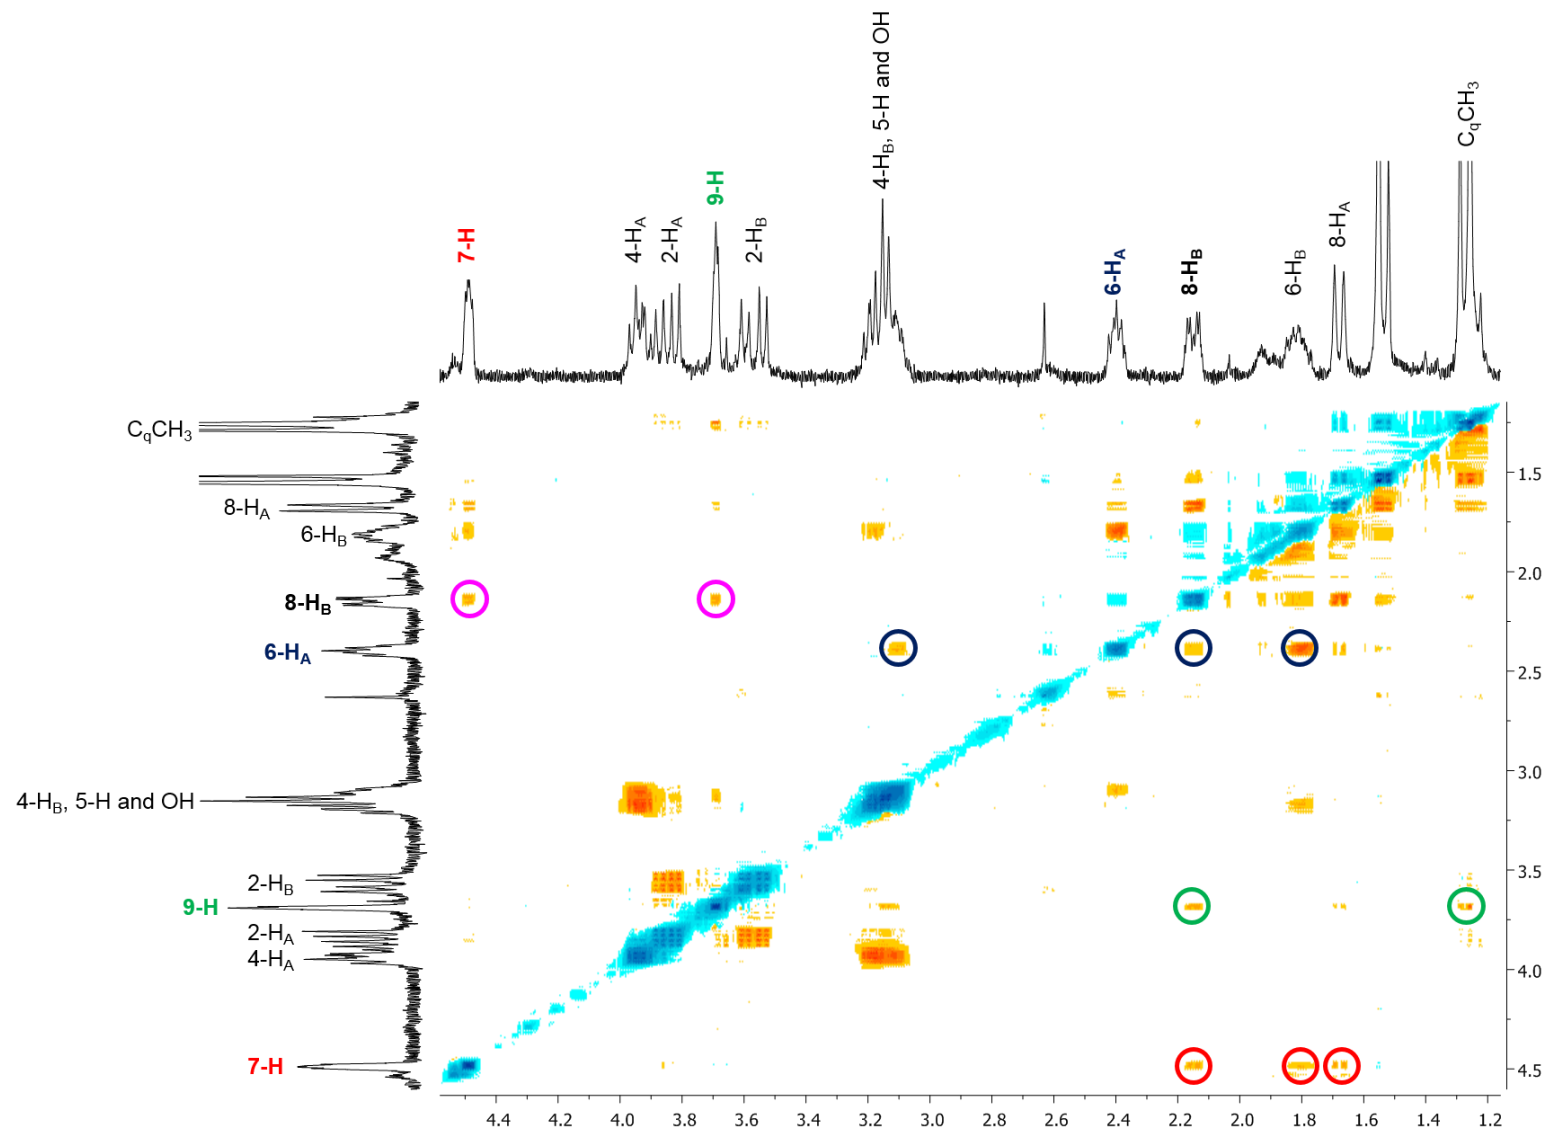

**S24 NOESY correlations:**

**6-H<sub>A</sub>:** 5-H; 6-H<sub>B</sub>; 8-H<sub>A</sub>

**7-H:** 6-H<sub>B</sub>; 8-H

**8-H<sub>B</sub>:** 7-H; 9-H

**9-H:** 8-H<sub>B</sub>; C<sub>q</sub>CH<sub>3</sub>

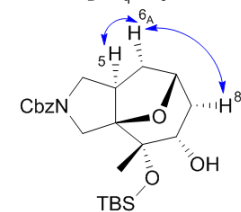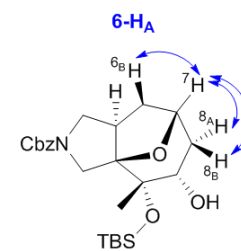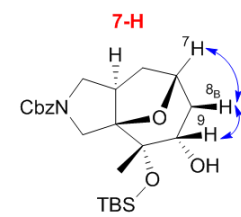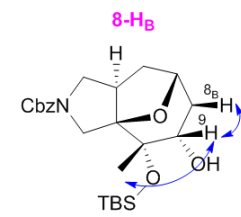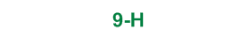

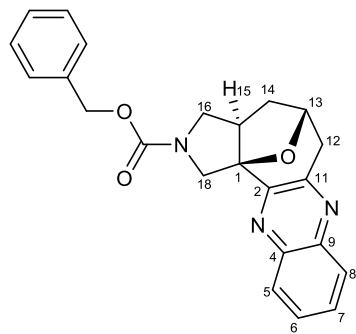

14

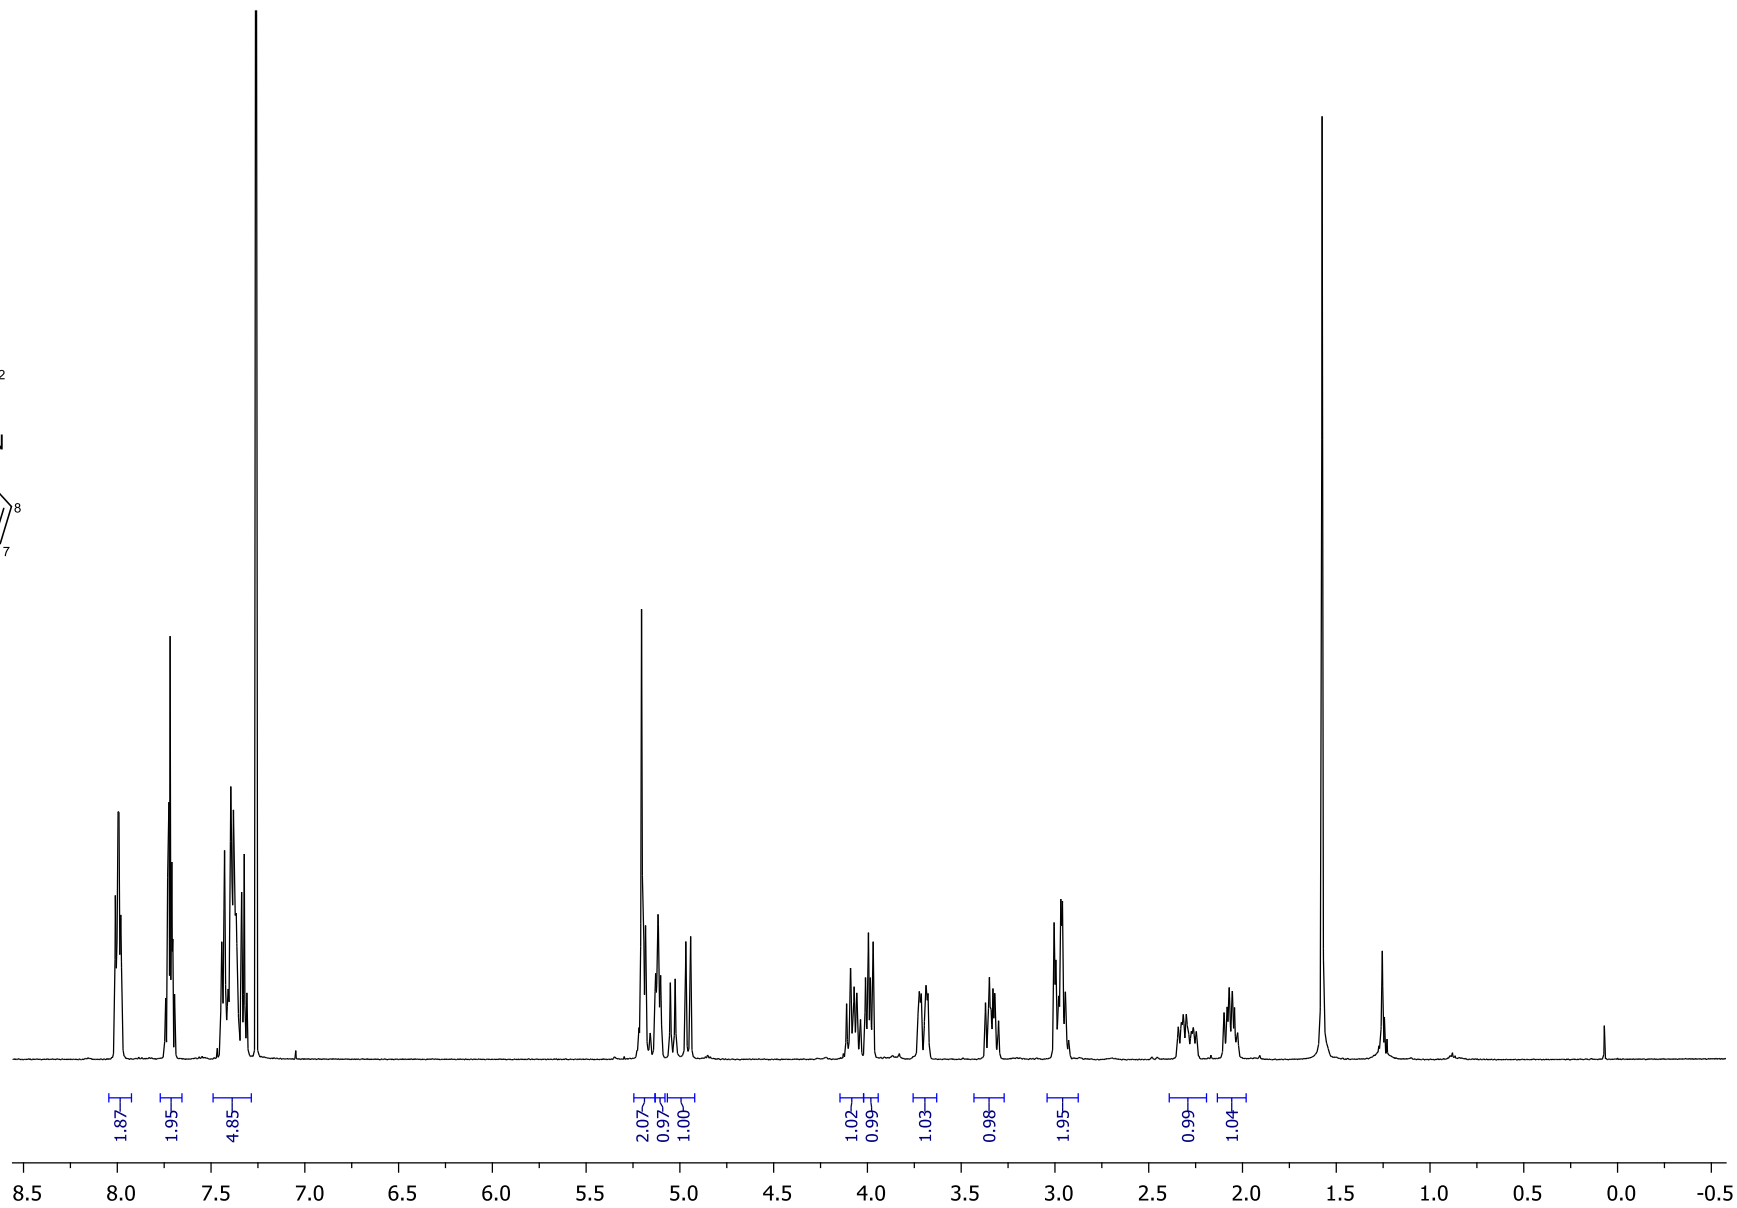

257

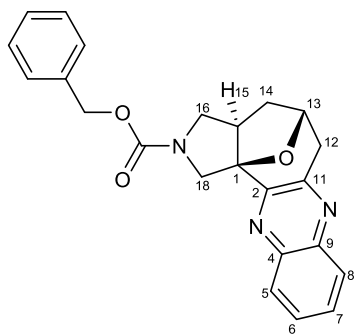

14

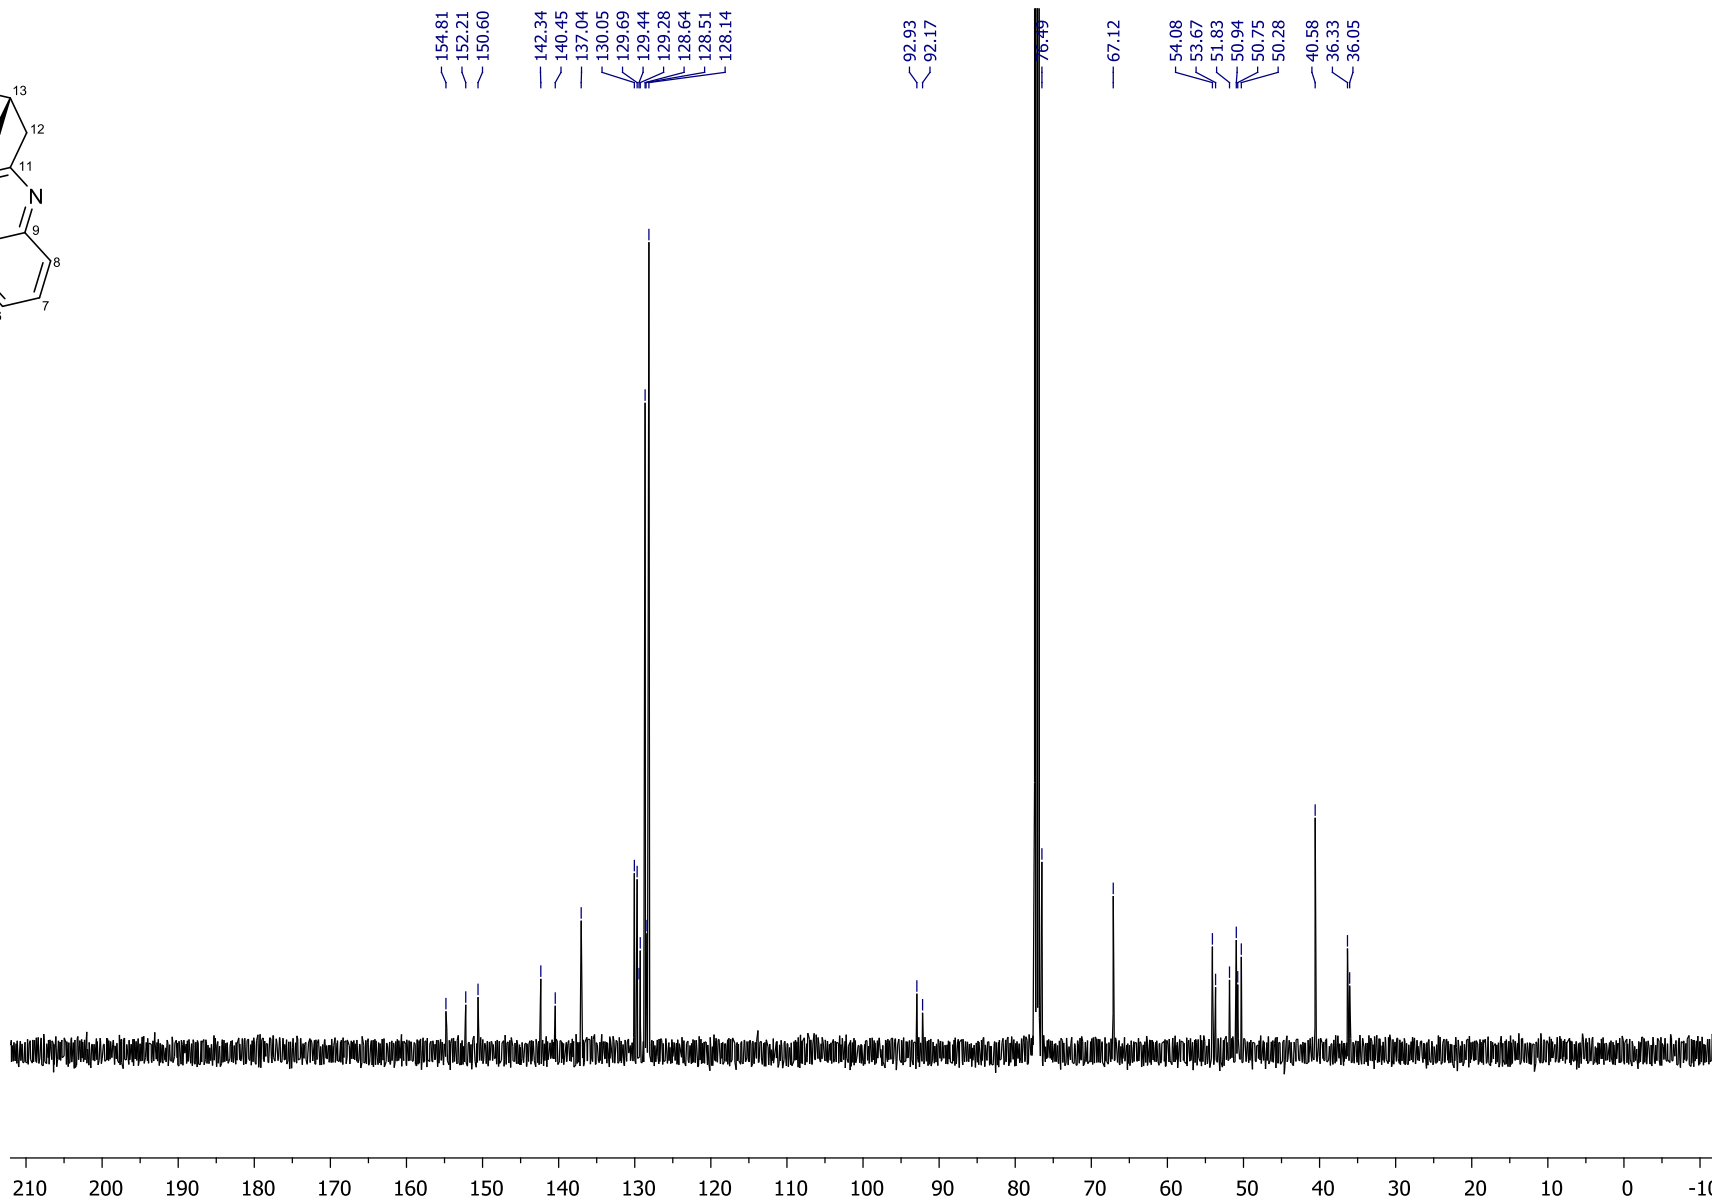

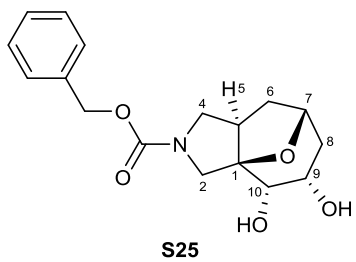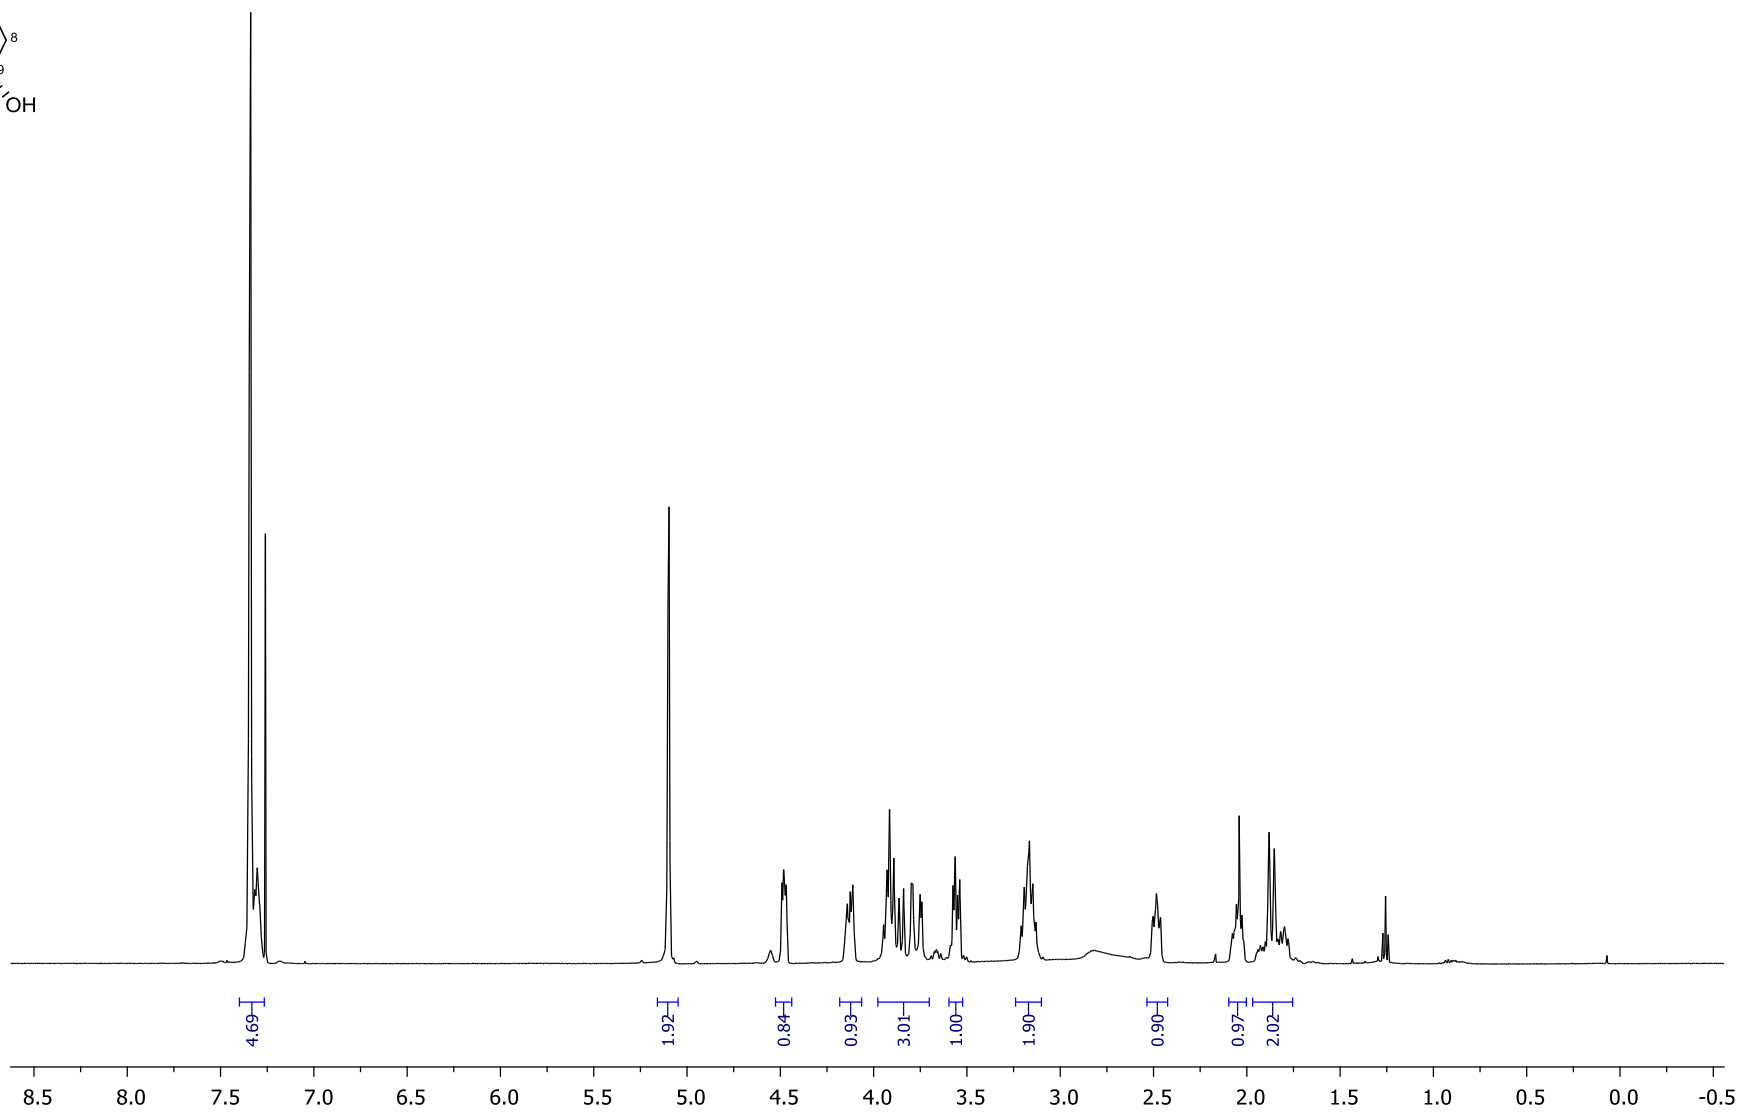



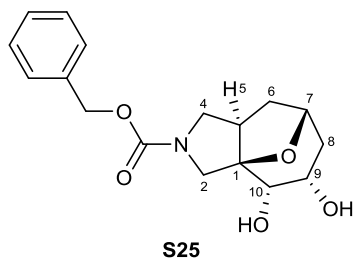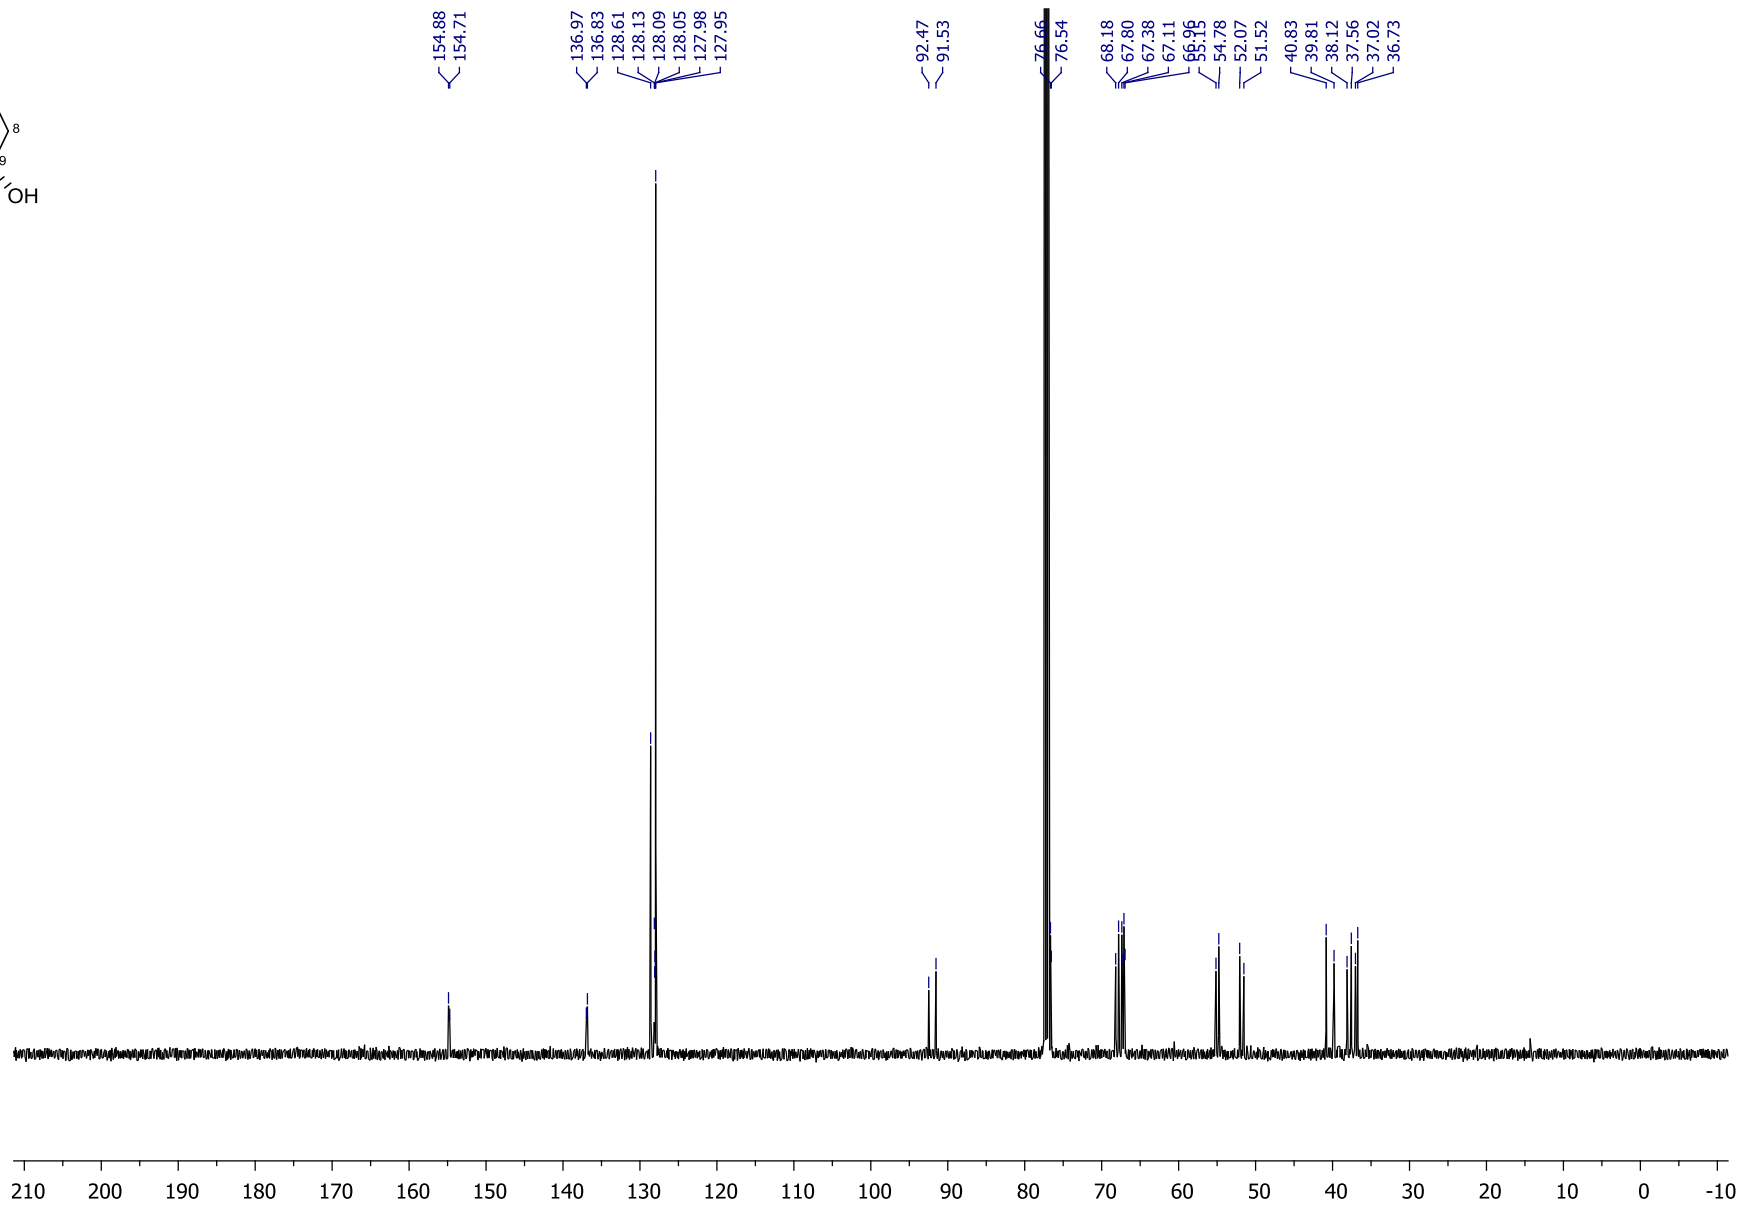

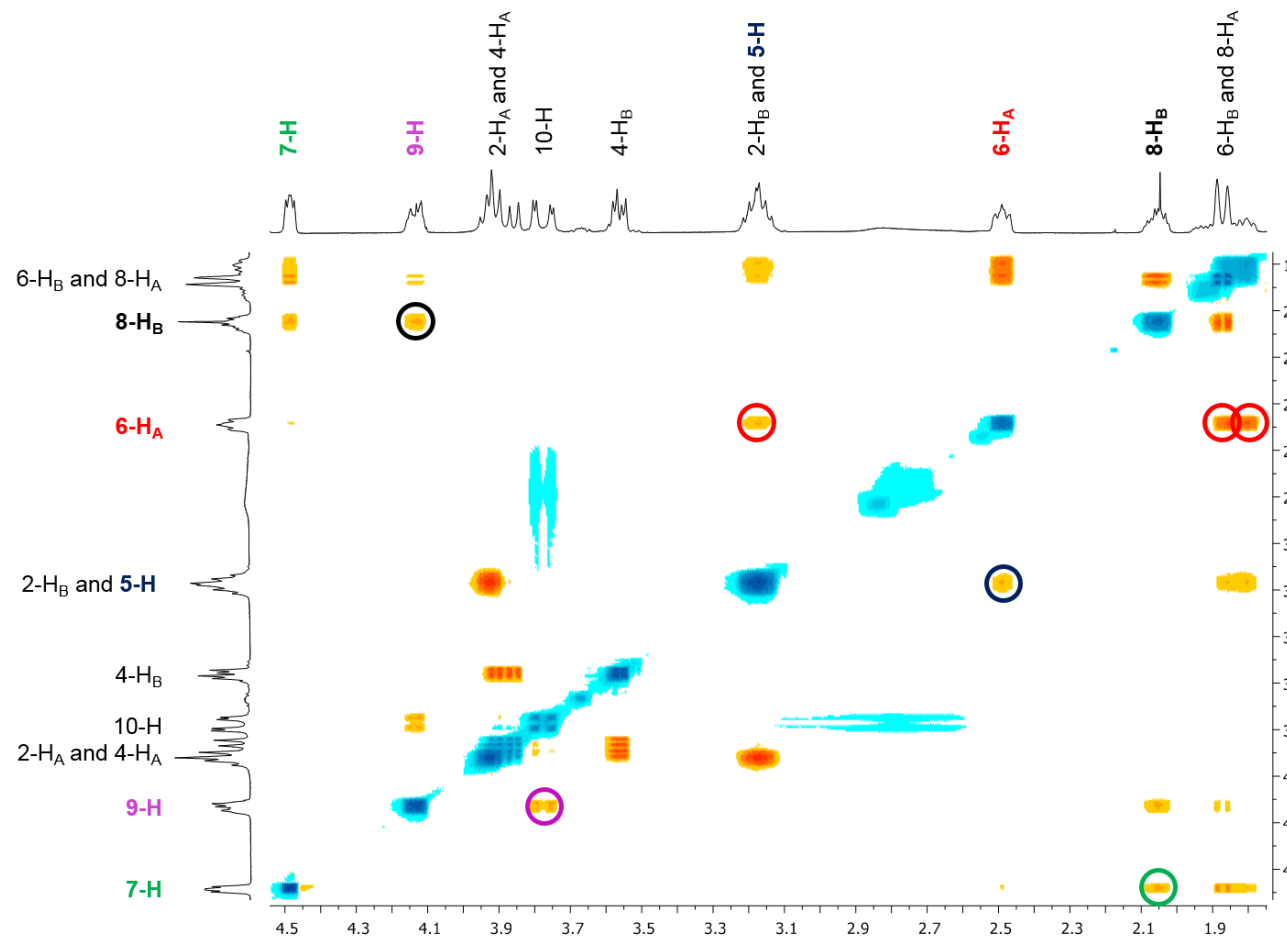

**S25 NOESY correlations:**

- 5-H:** 6<sub>A</sub>
- 6-H<sub>A</sub>:** 5-H; 8-H<sub>A</sub>
- 7-H:** 6-H<sub>B</sub>; 8-H<sub>B</sub>
- 8-H<sub>B</sub>:** 7-H; 9-H
- 9-H:** 10-H

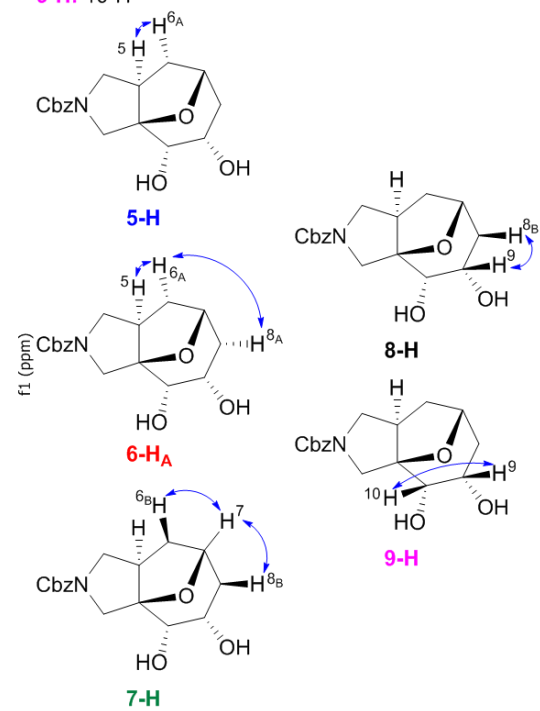

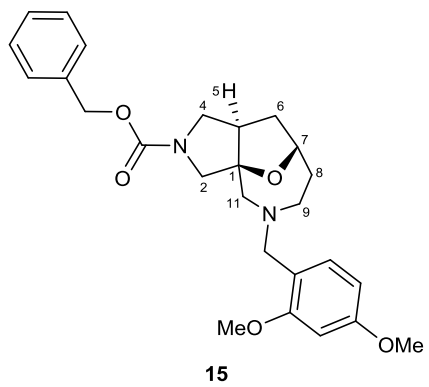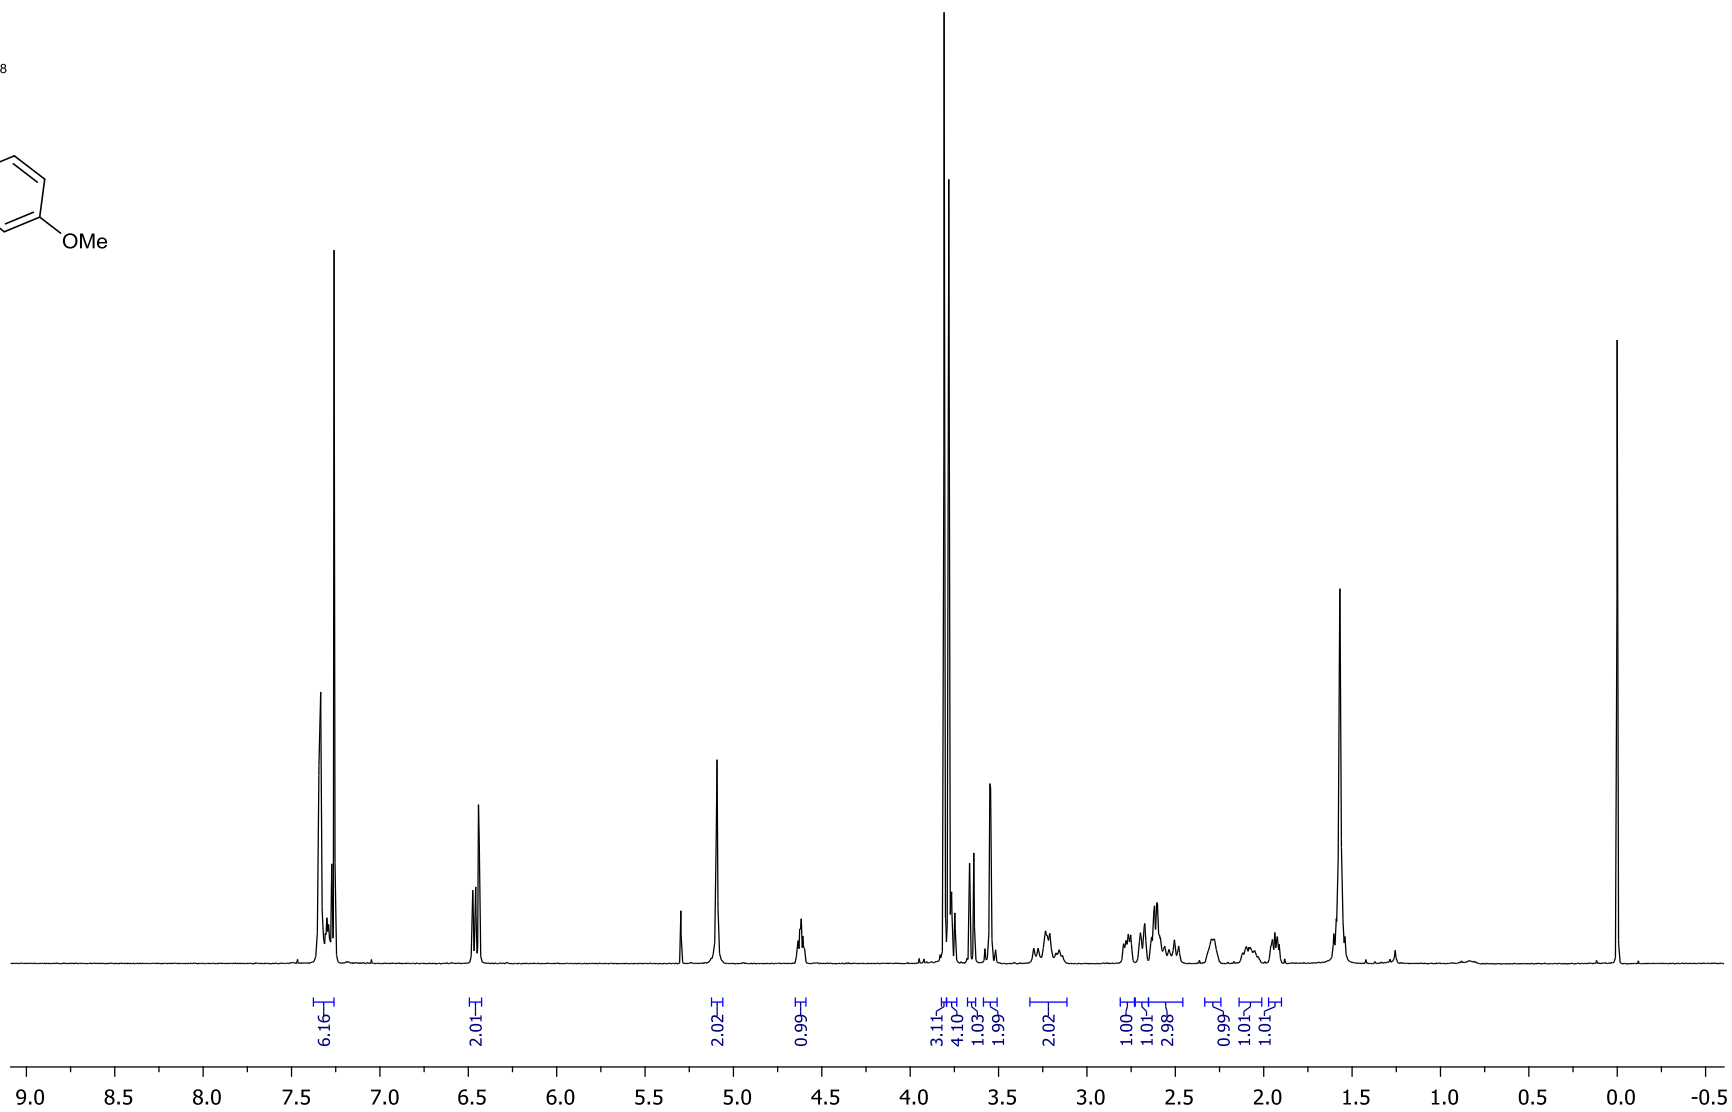

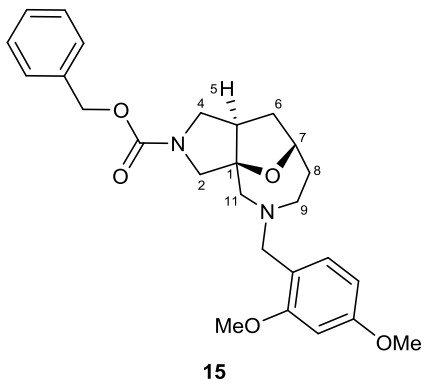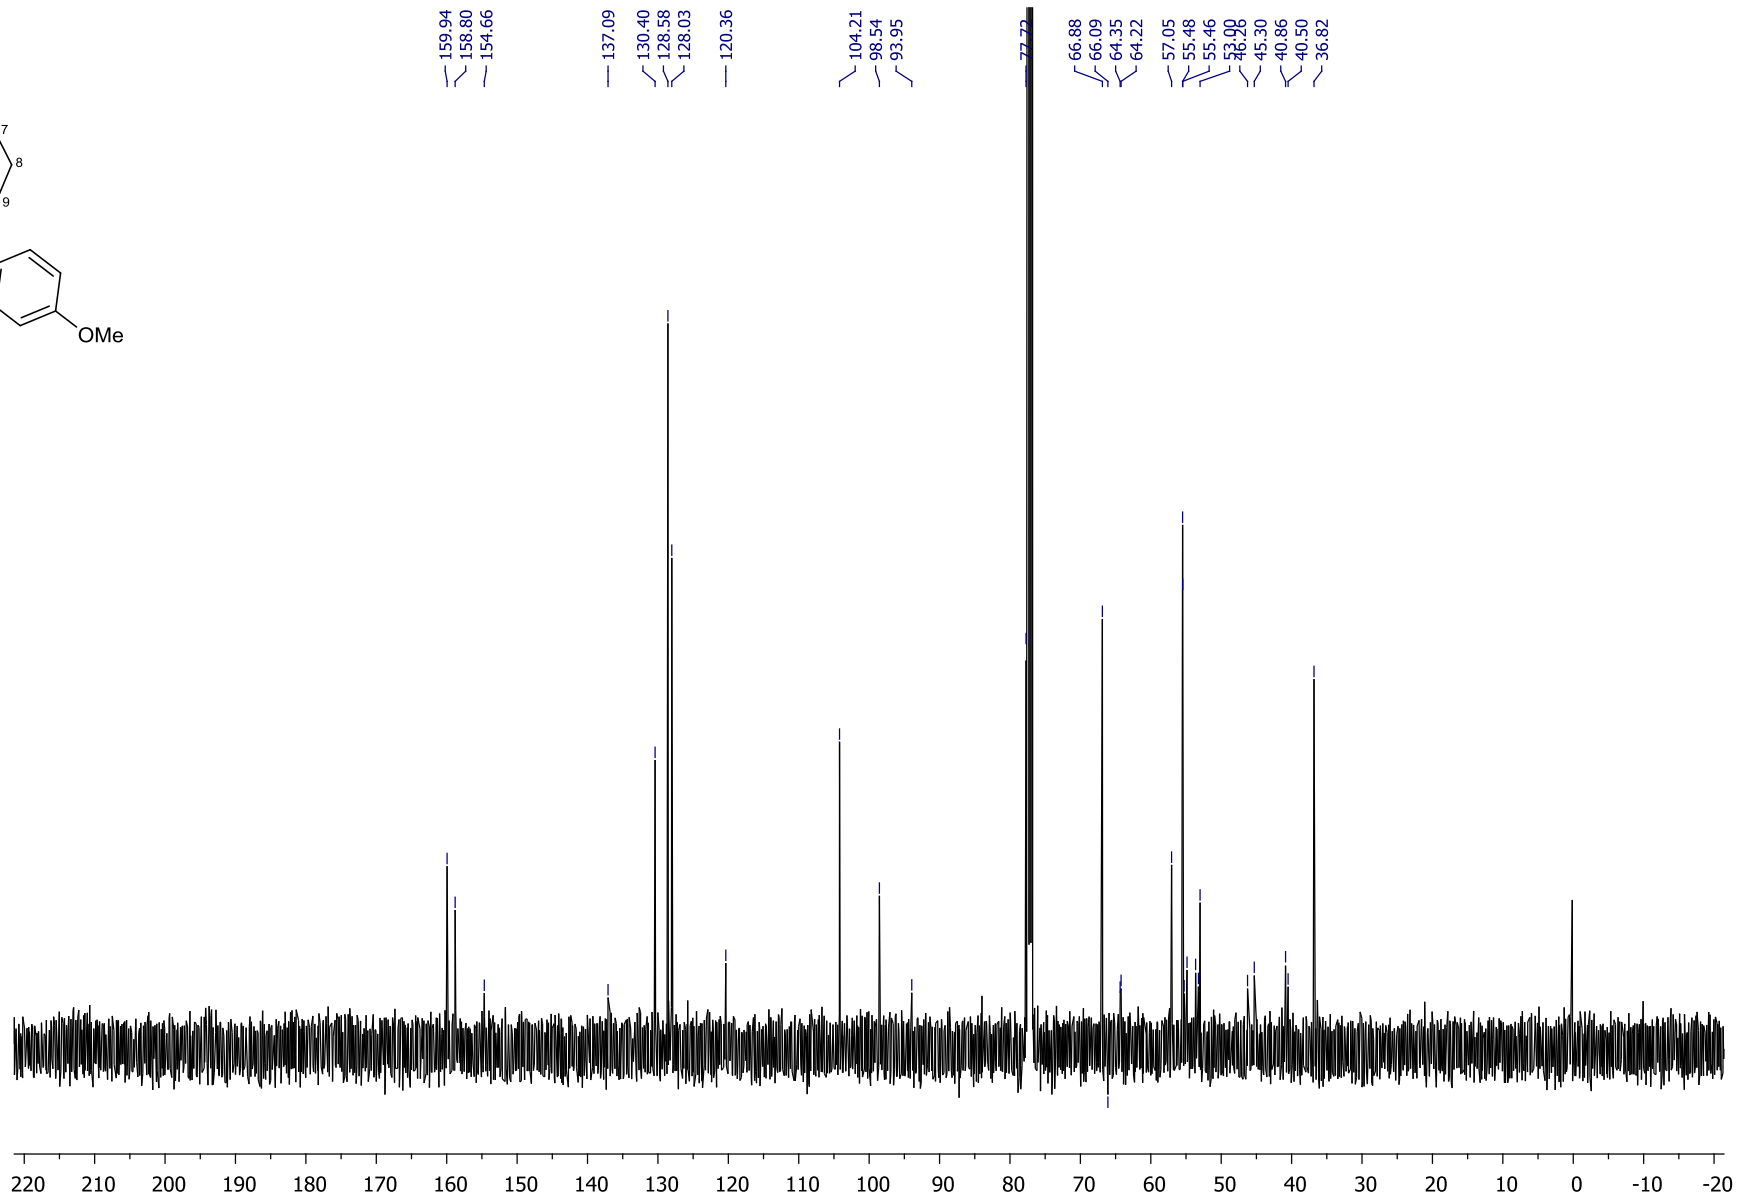

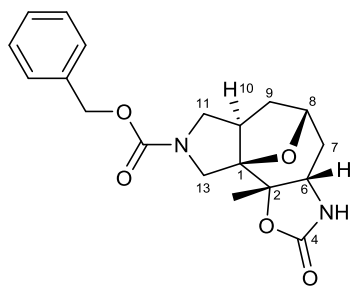

16

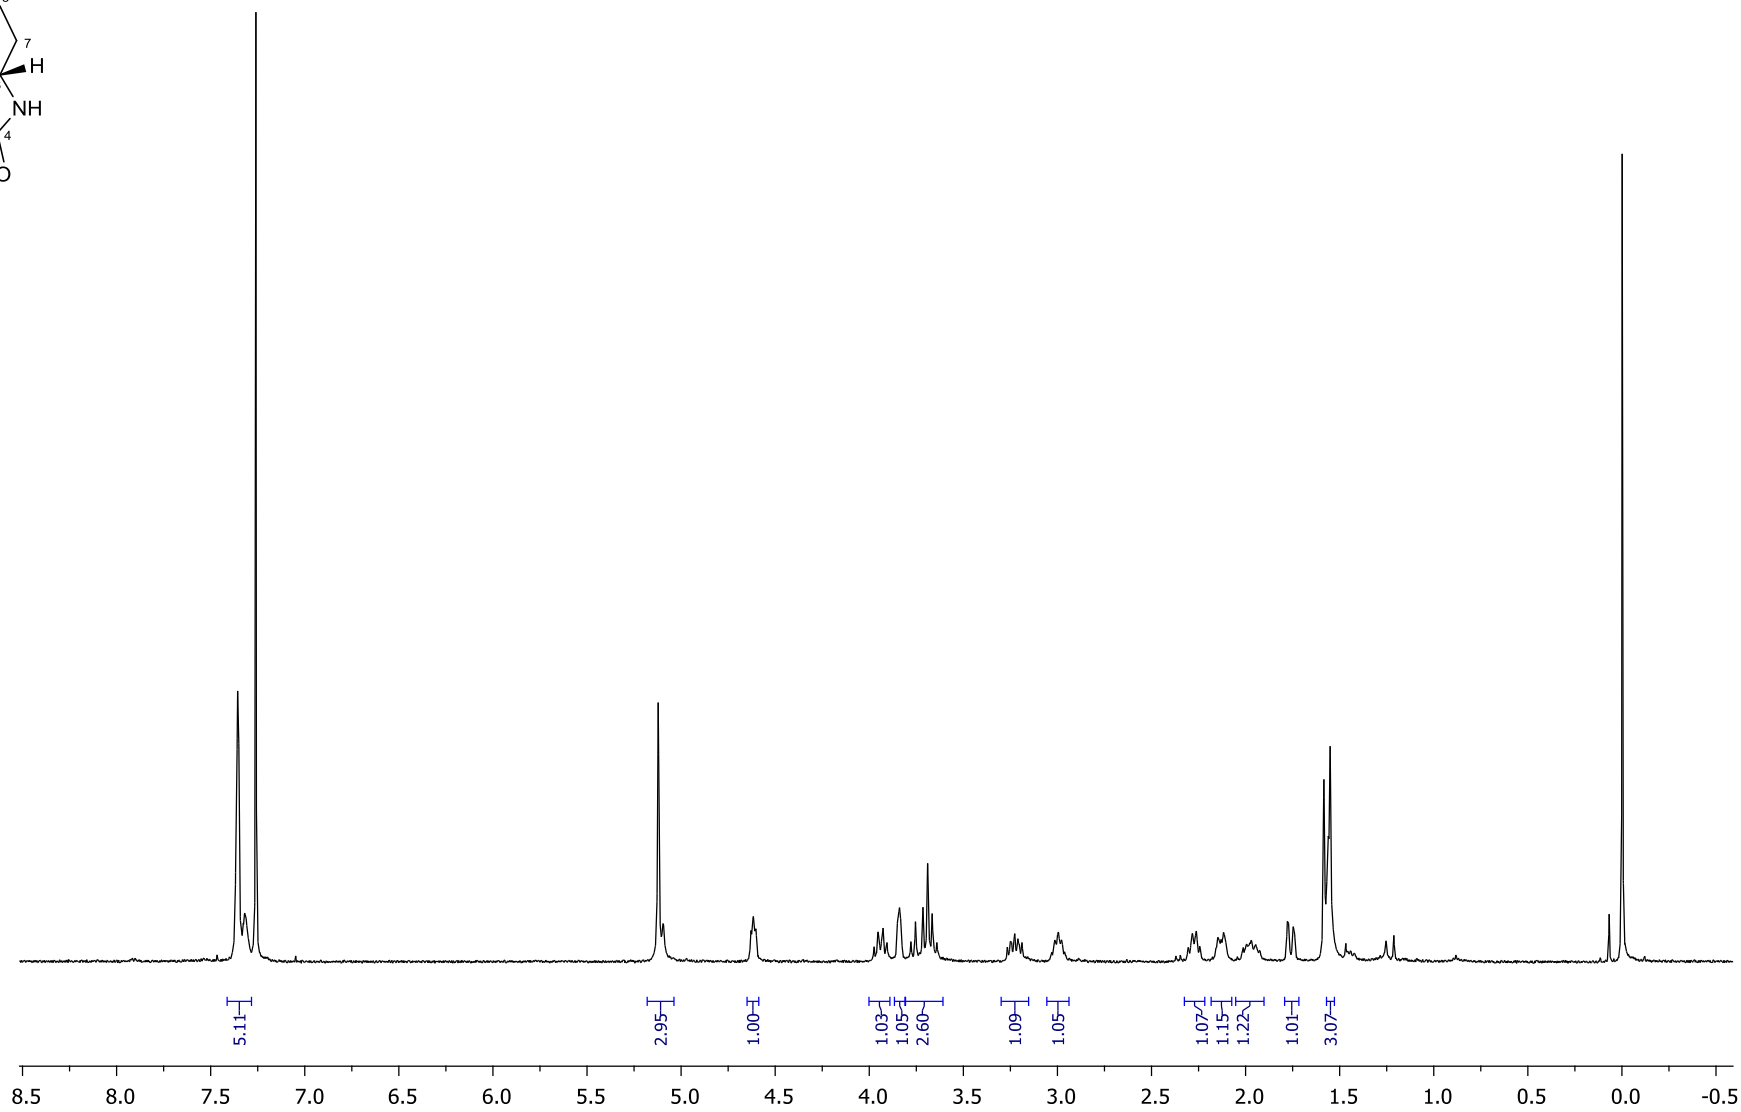

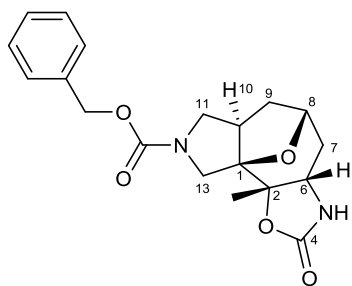

16

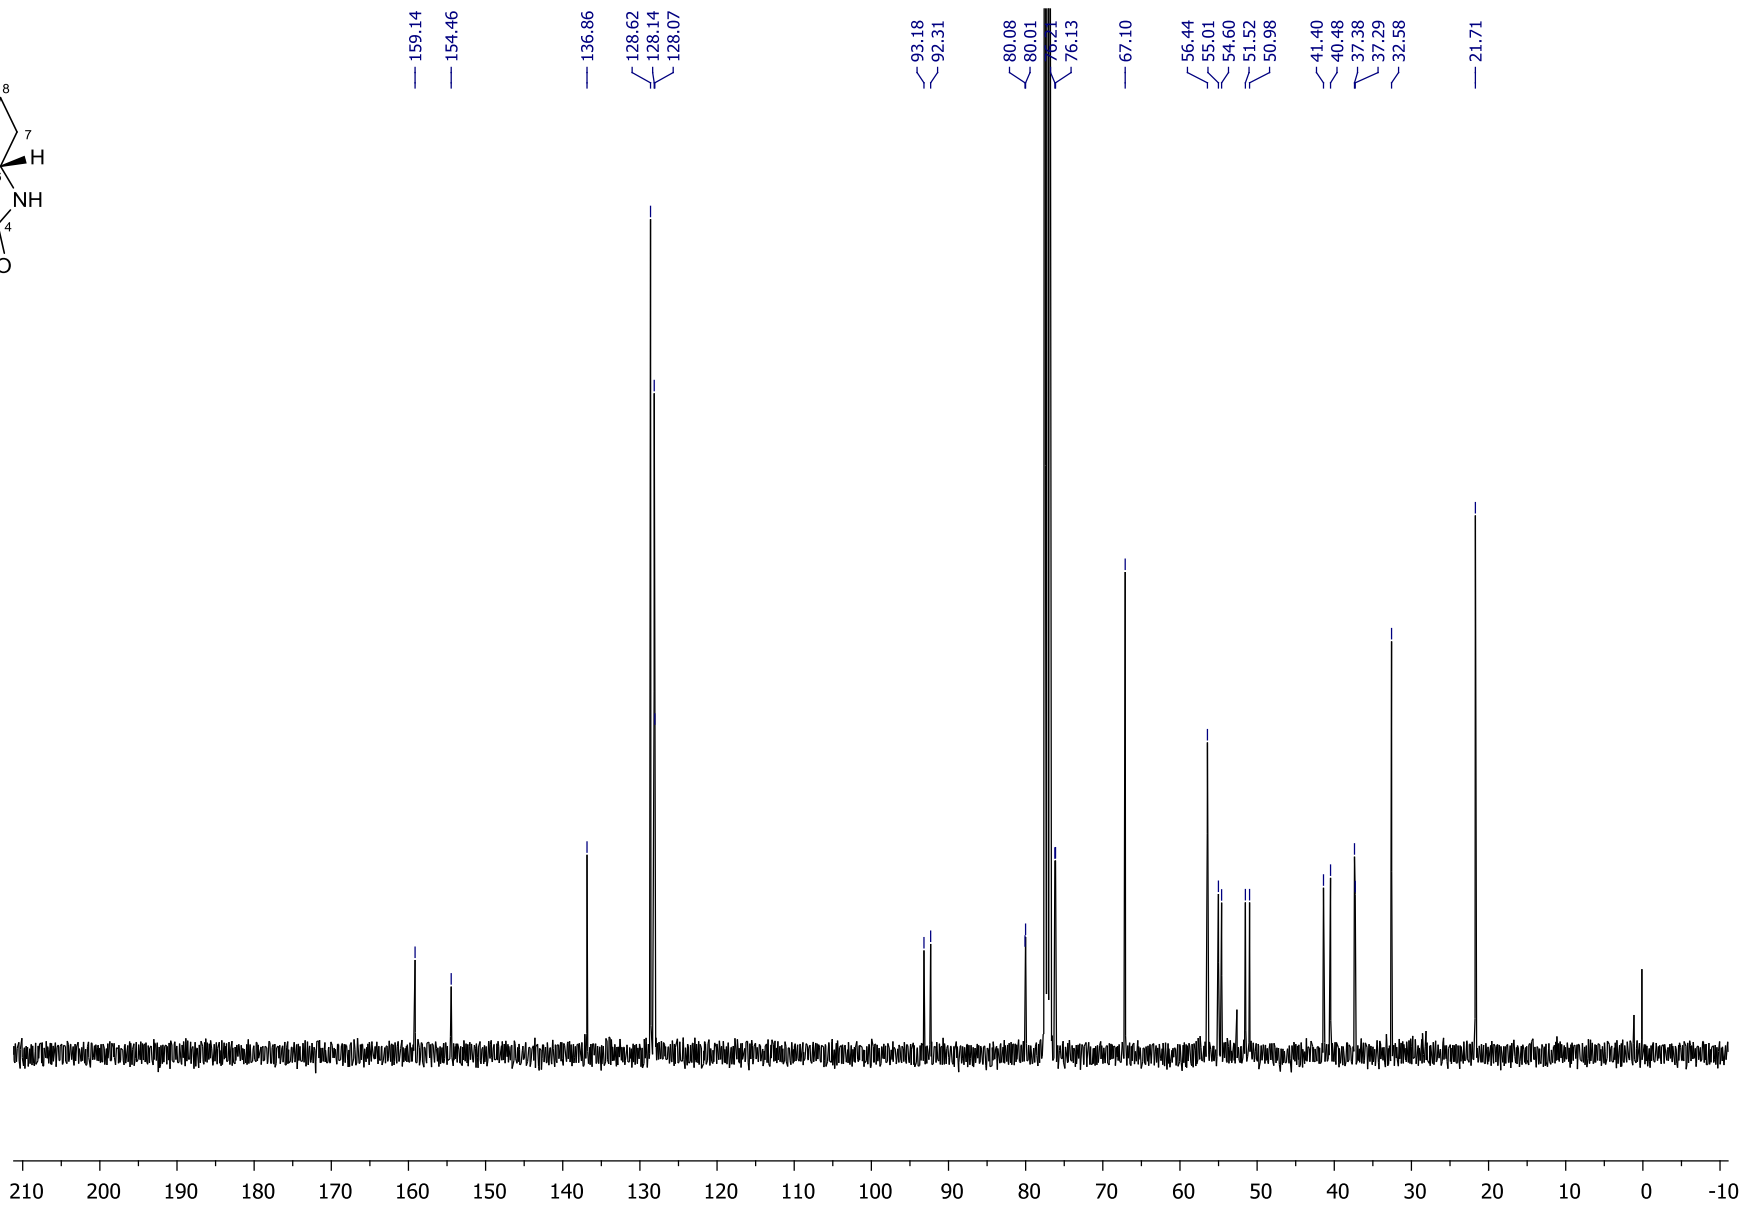

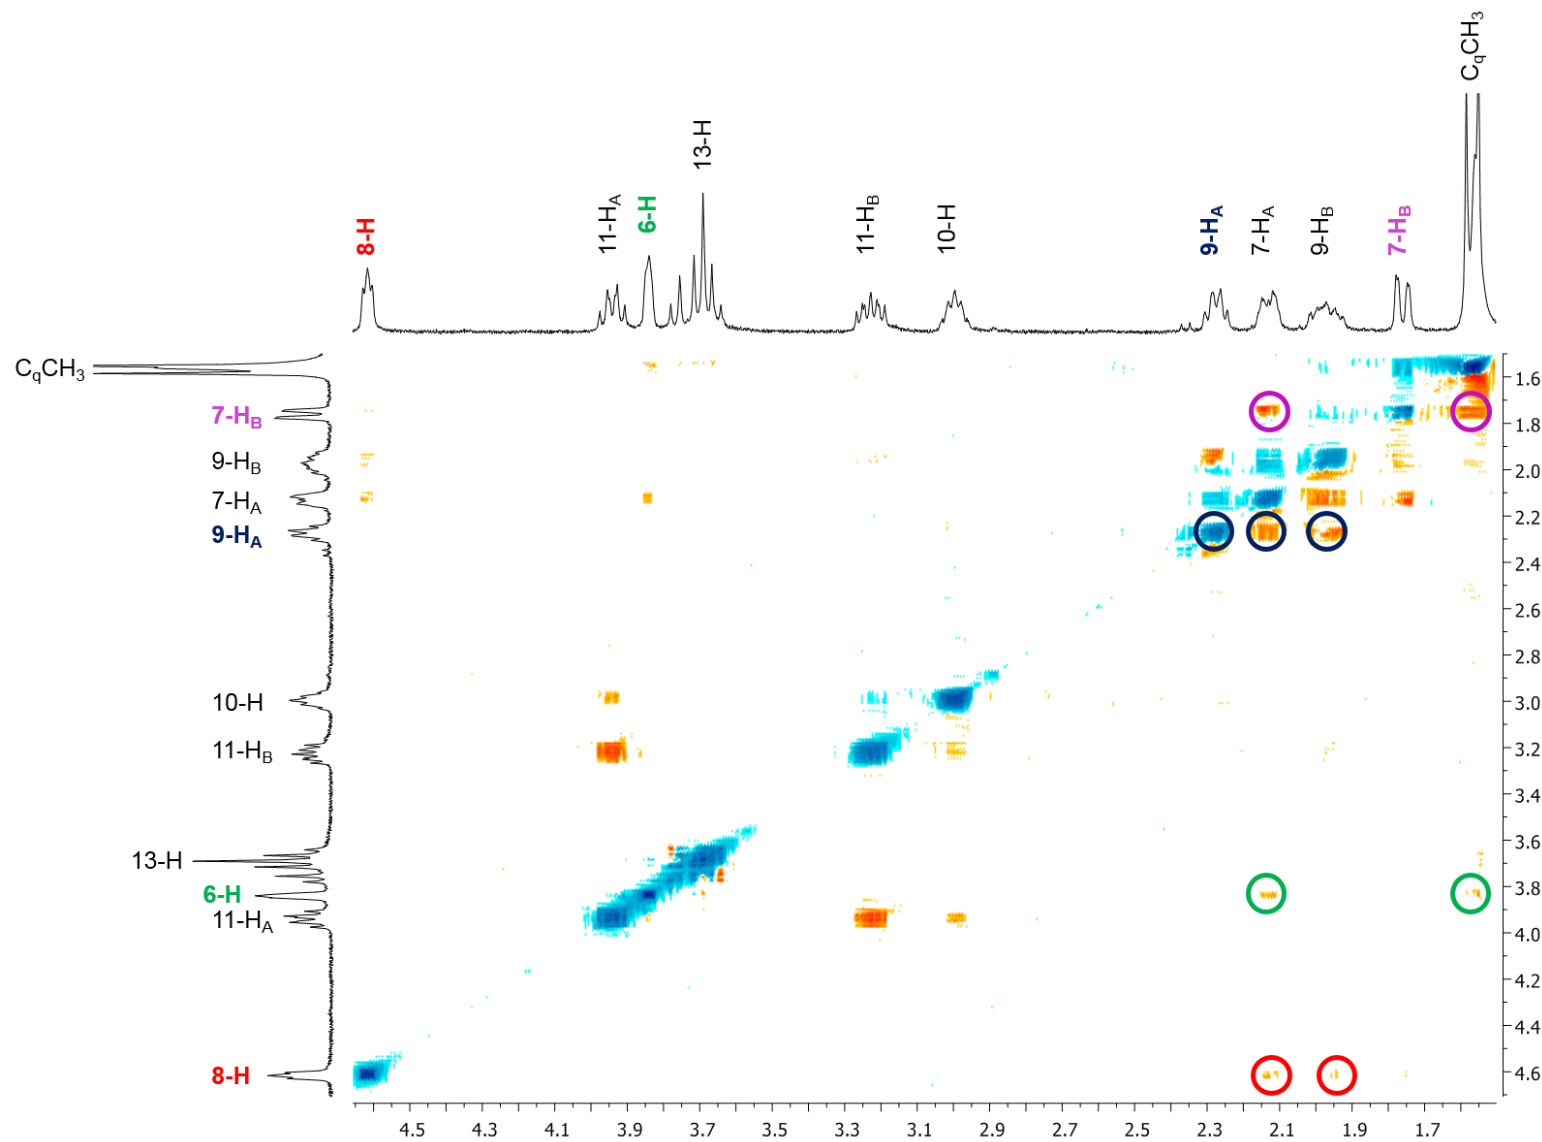

**16 NOESY correlations:**

**6-H:** 7-H<sub>A</sub>; C<sub>q</sub>CH<sub>3</sub>

**7-H<sub>B</sub>:** 7-H<sub>A</sub>; C<sub>q</sub>CH<sub>3</sub>

**8-H:** 7-H<sub>B</sub>; 9-H<sub>B</sub>

**9-H<sub>B</sub>:** 7-H<sub>A</sub>; 9-H<sub>B</sub>

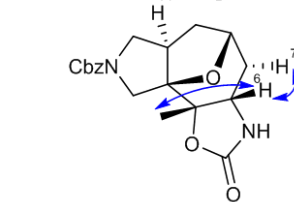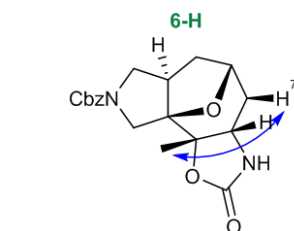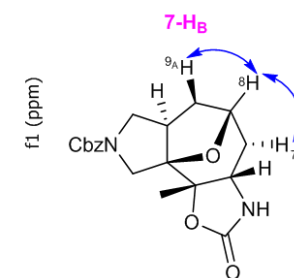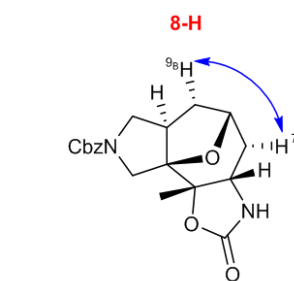

**9-H<sub>B</sub>**

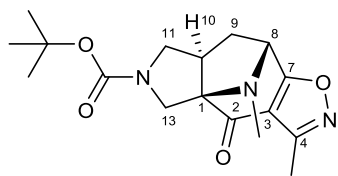

S26

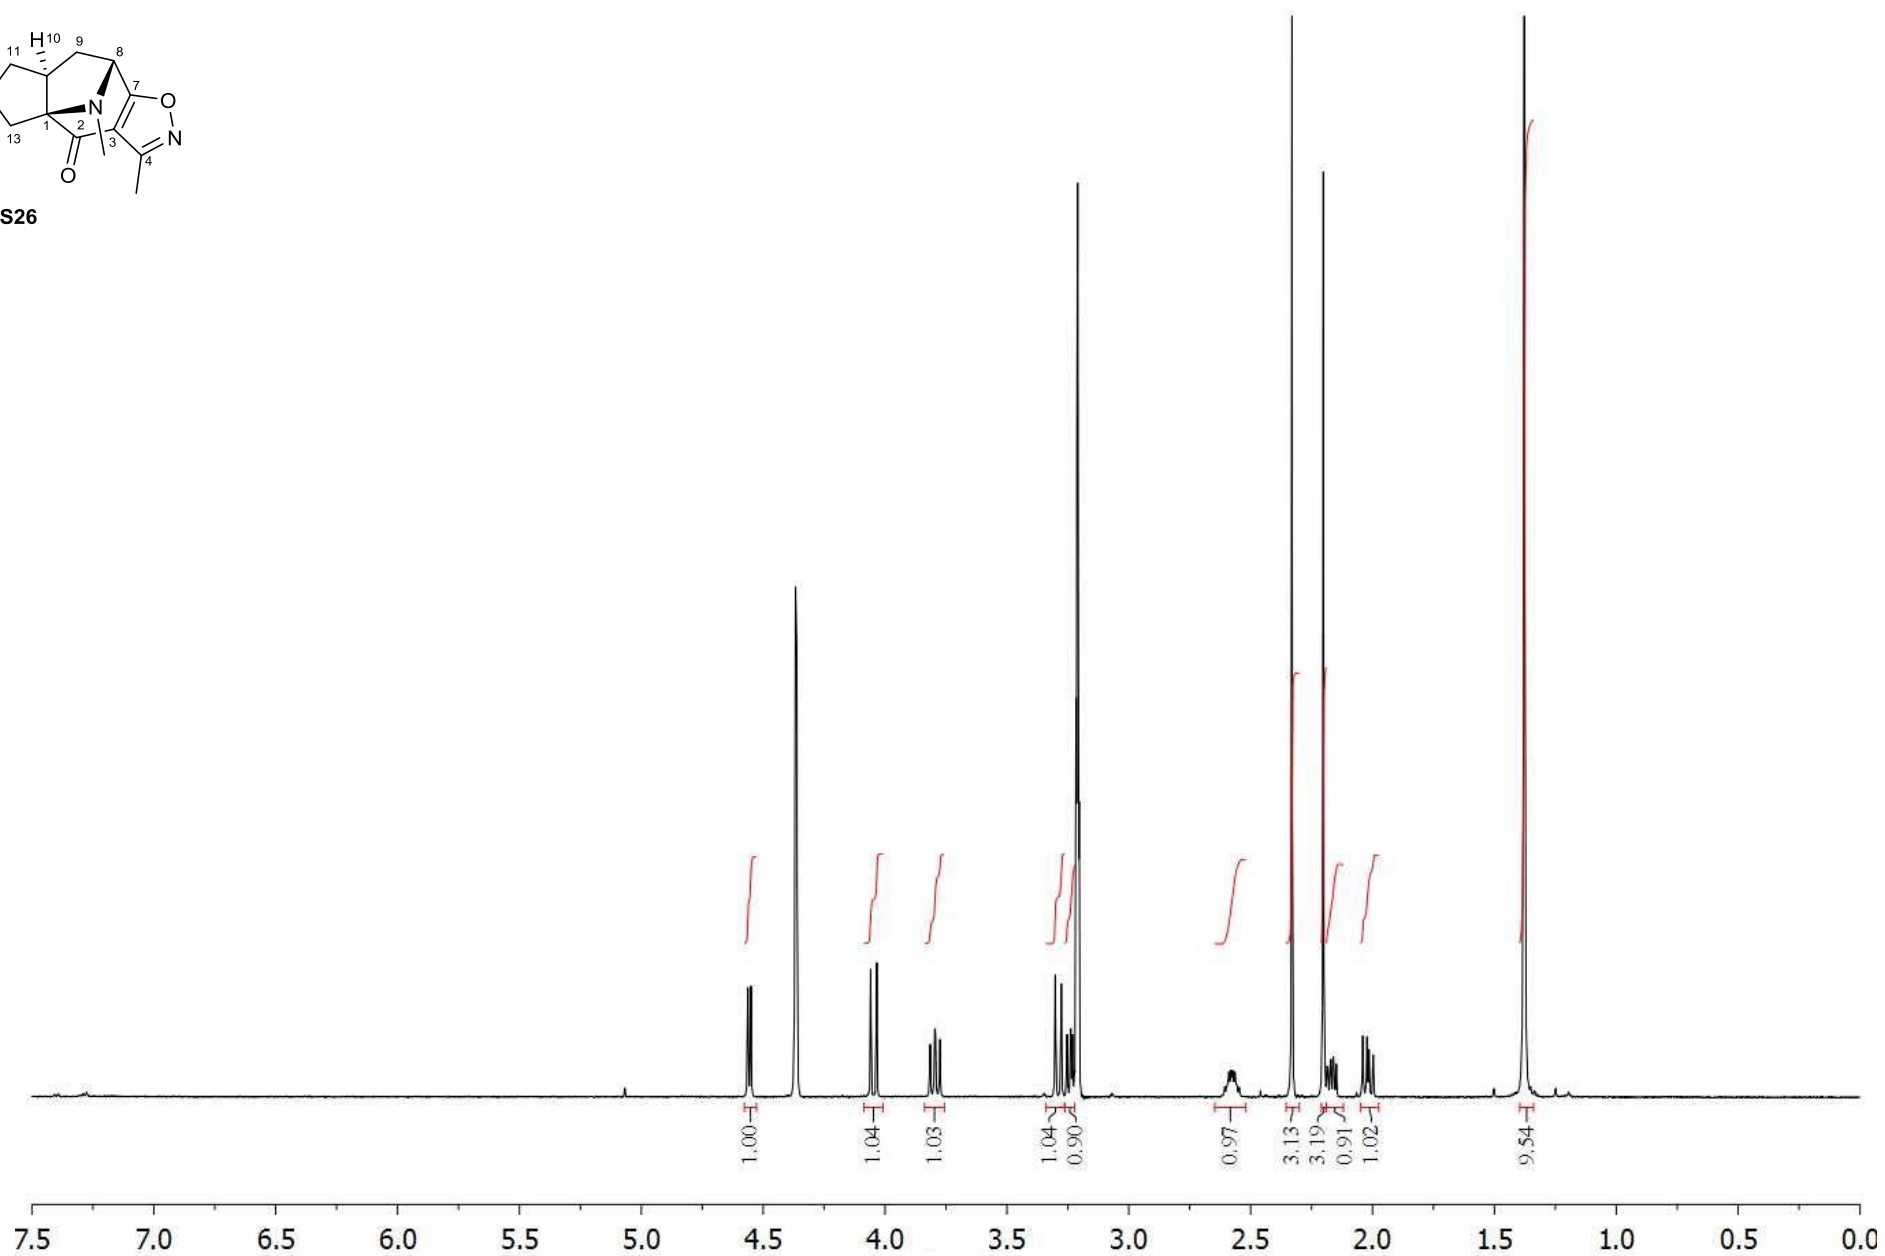



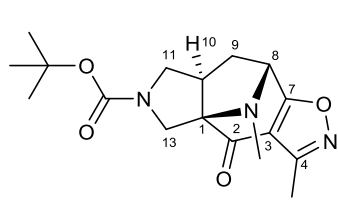

S26

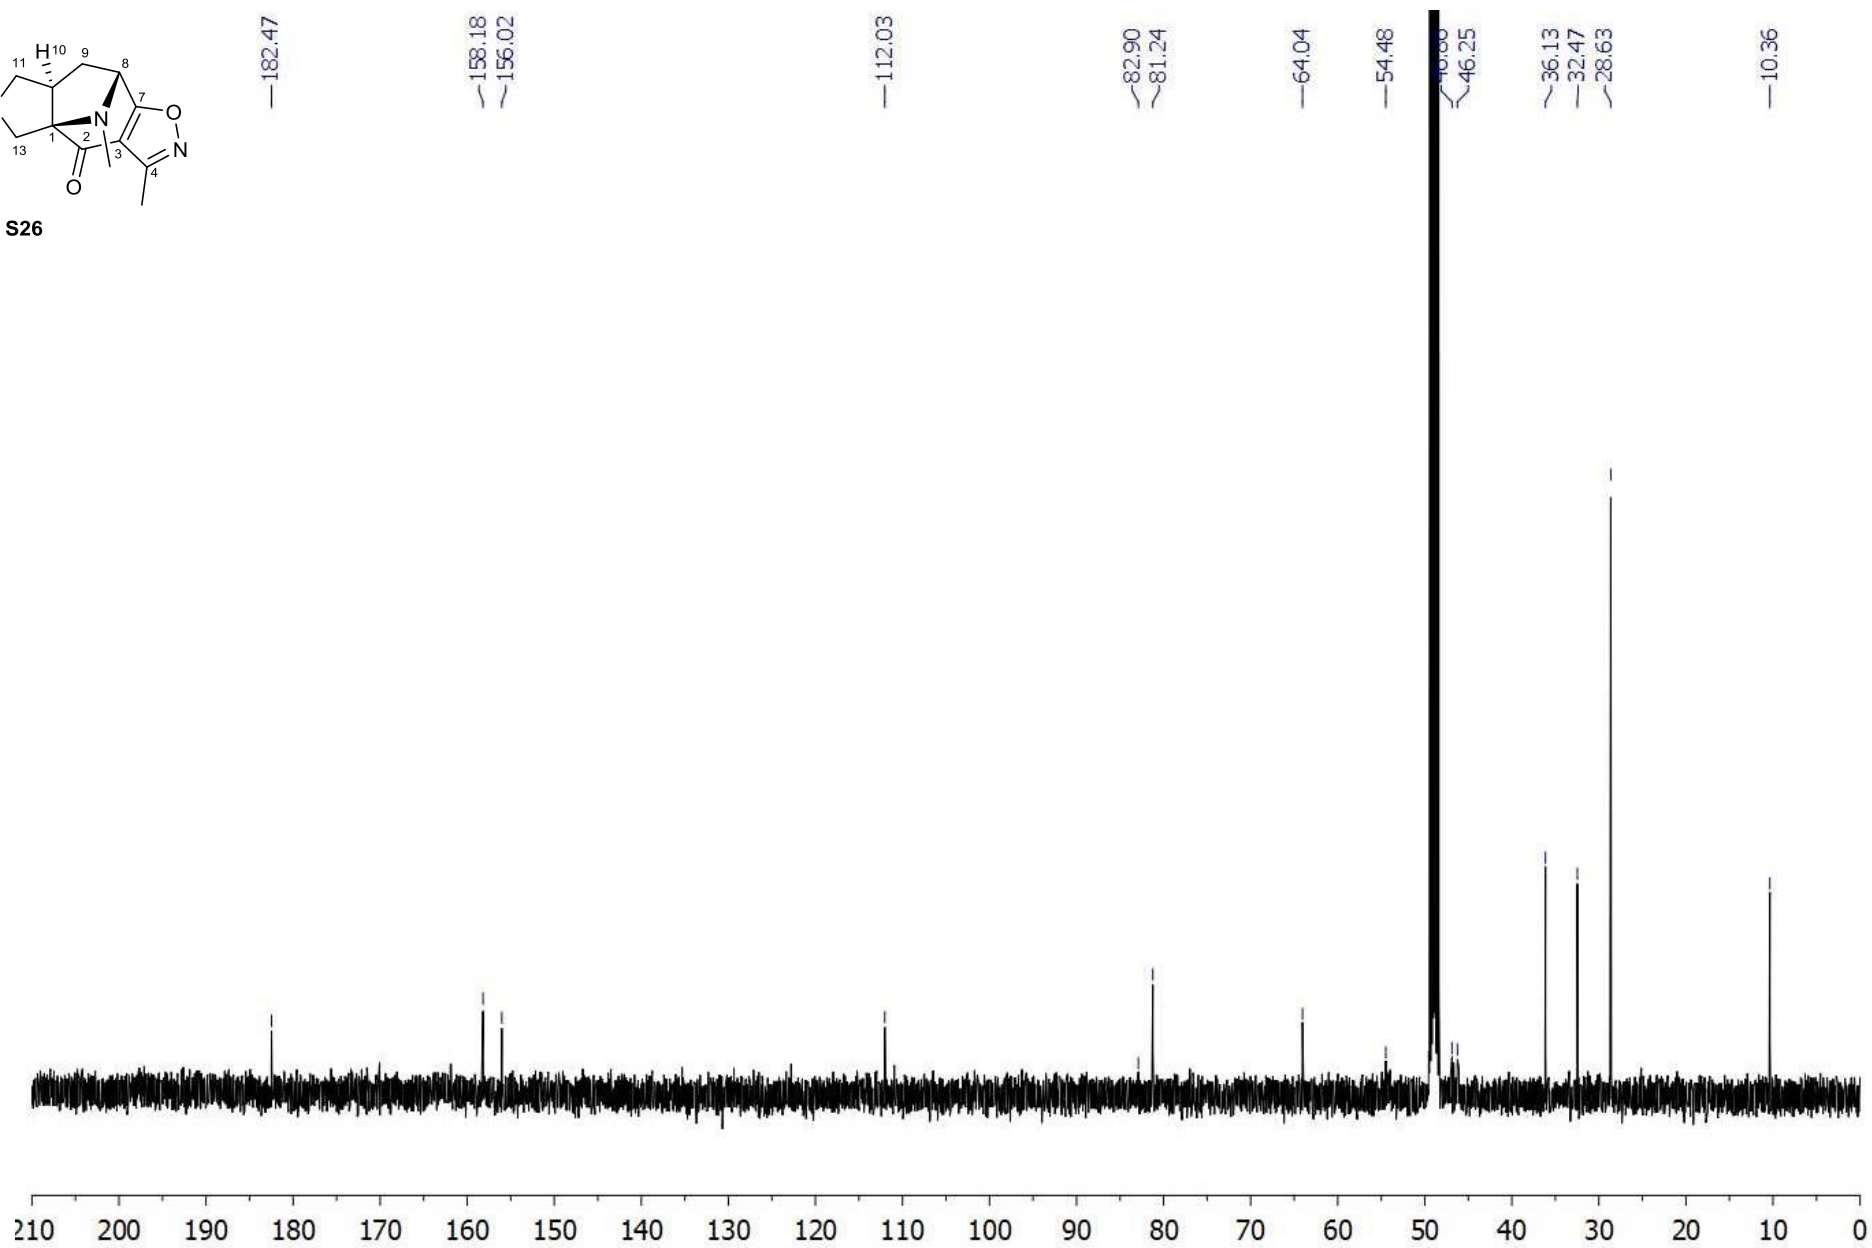

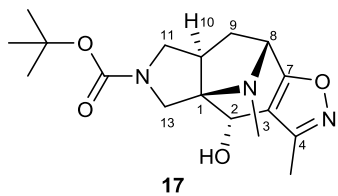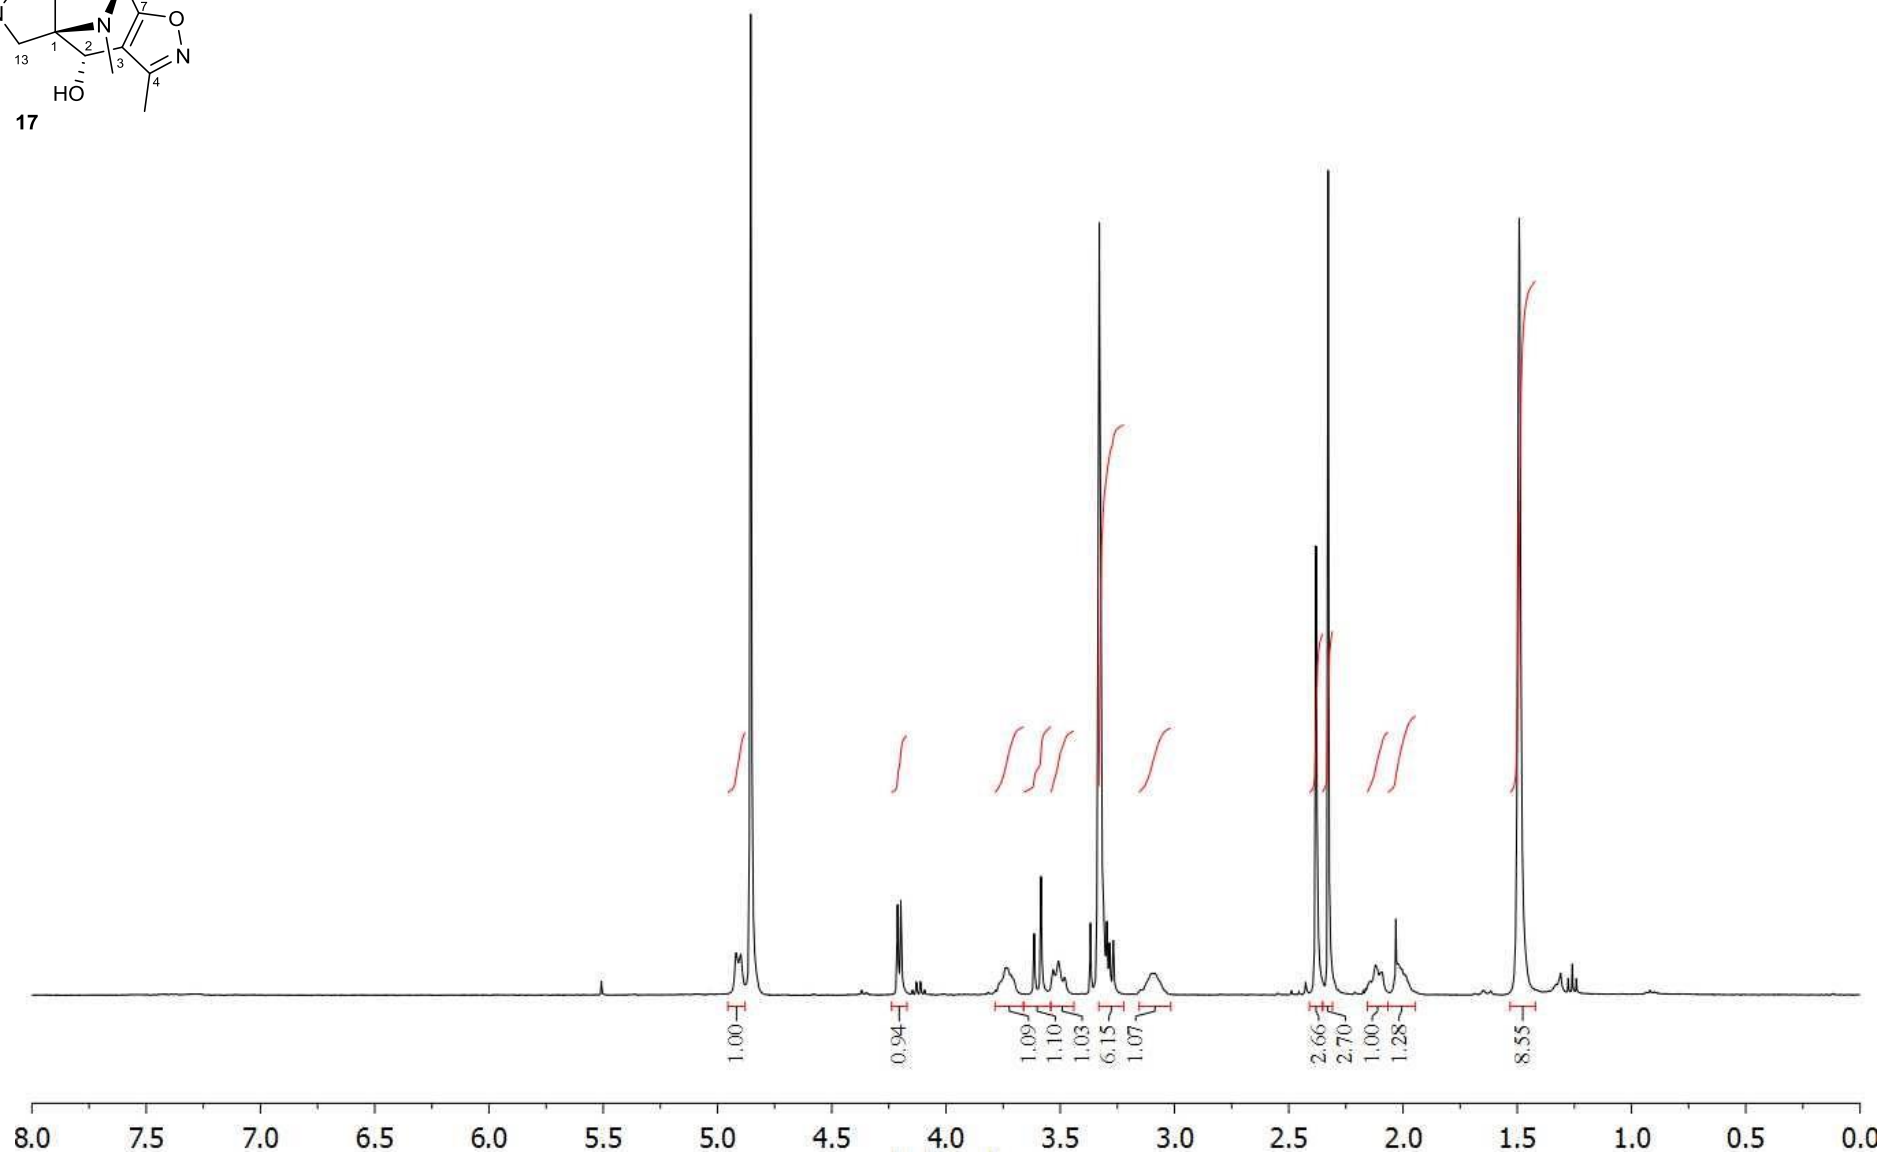

269

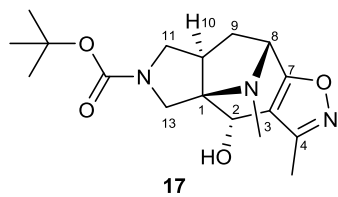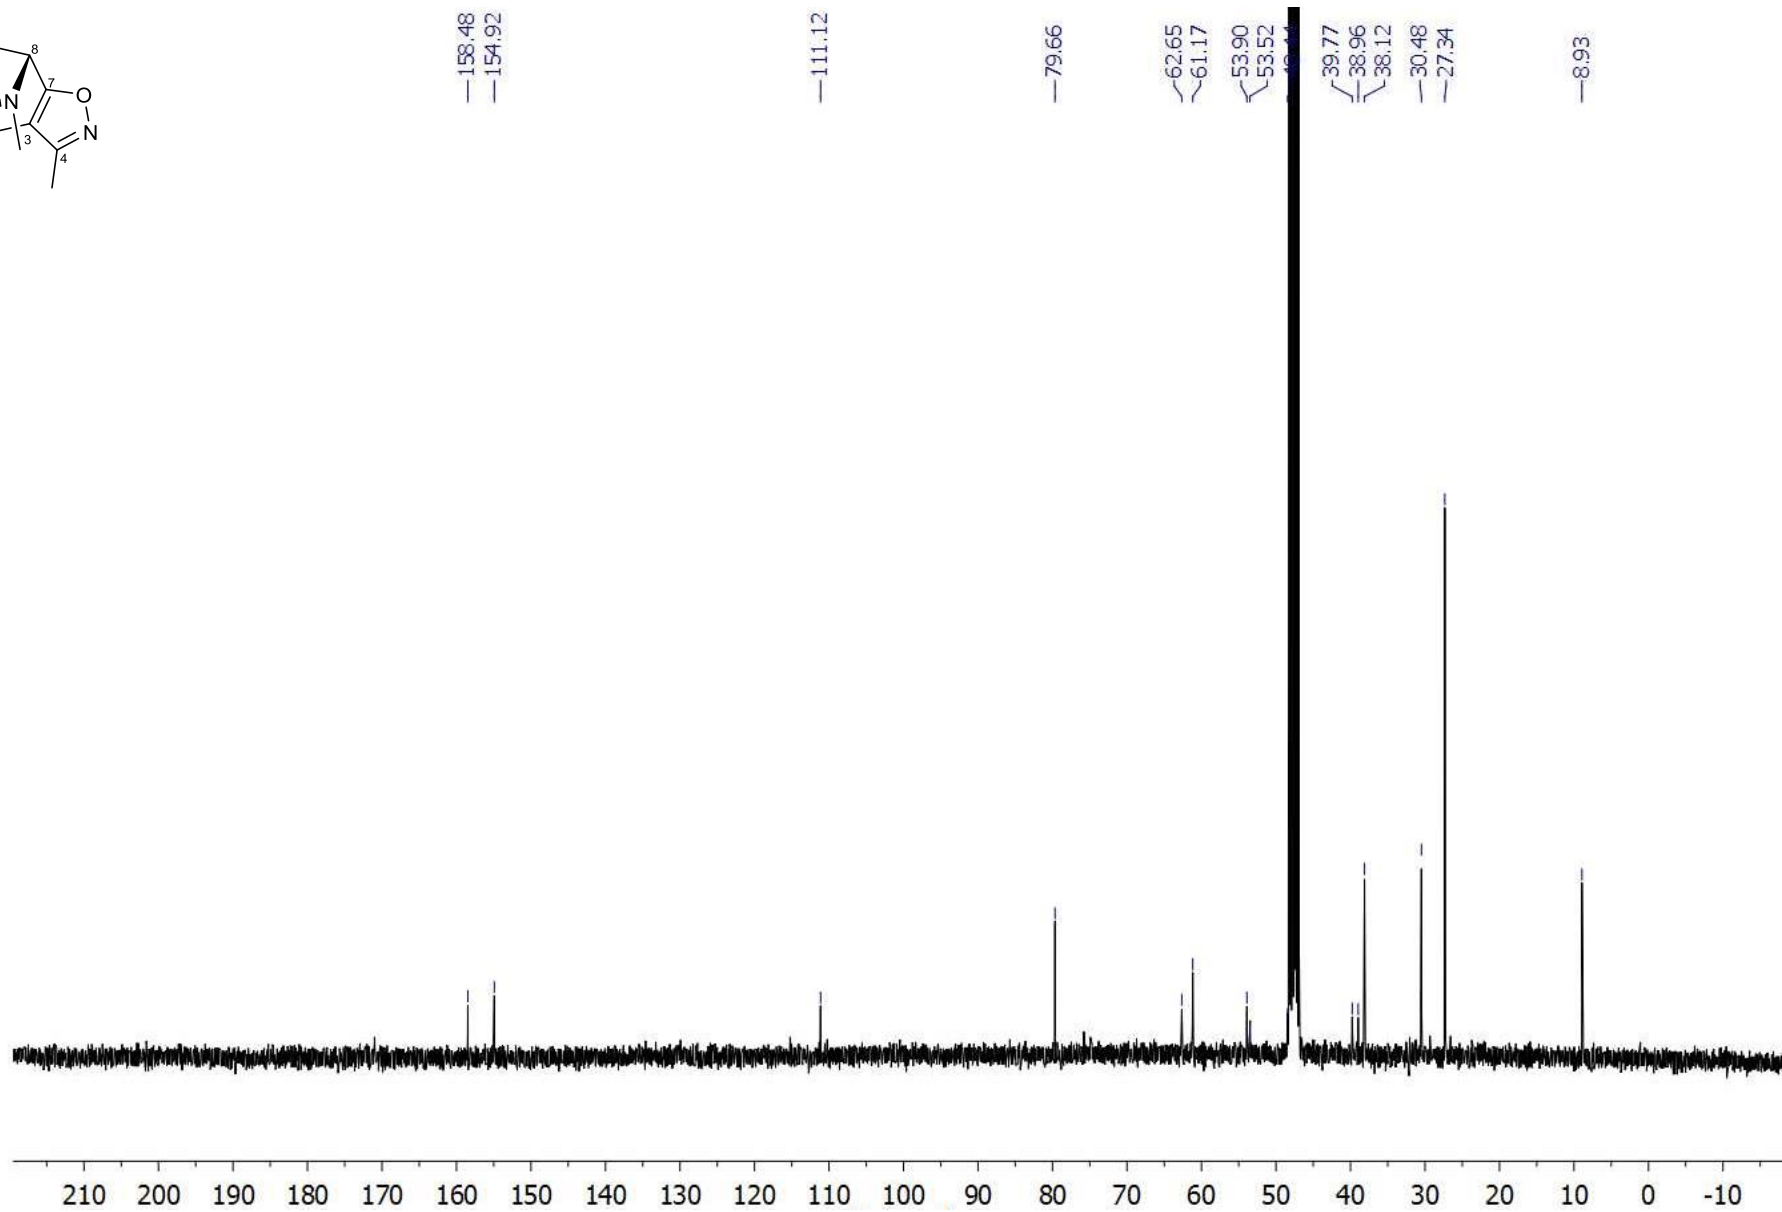

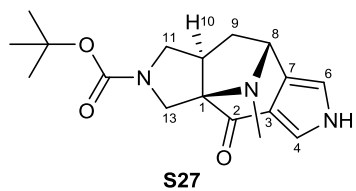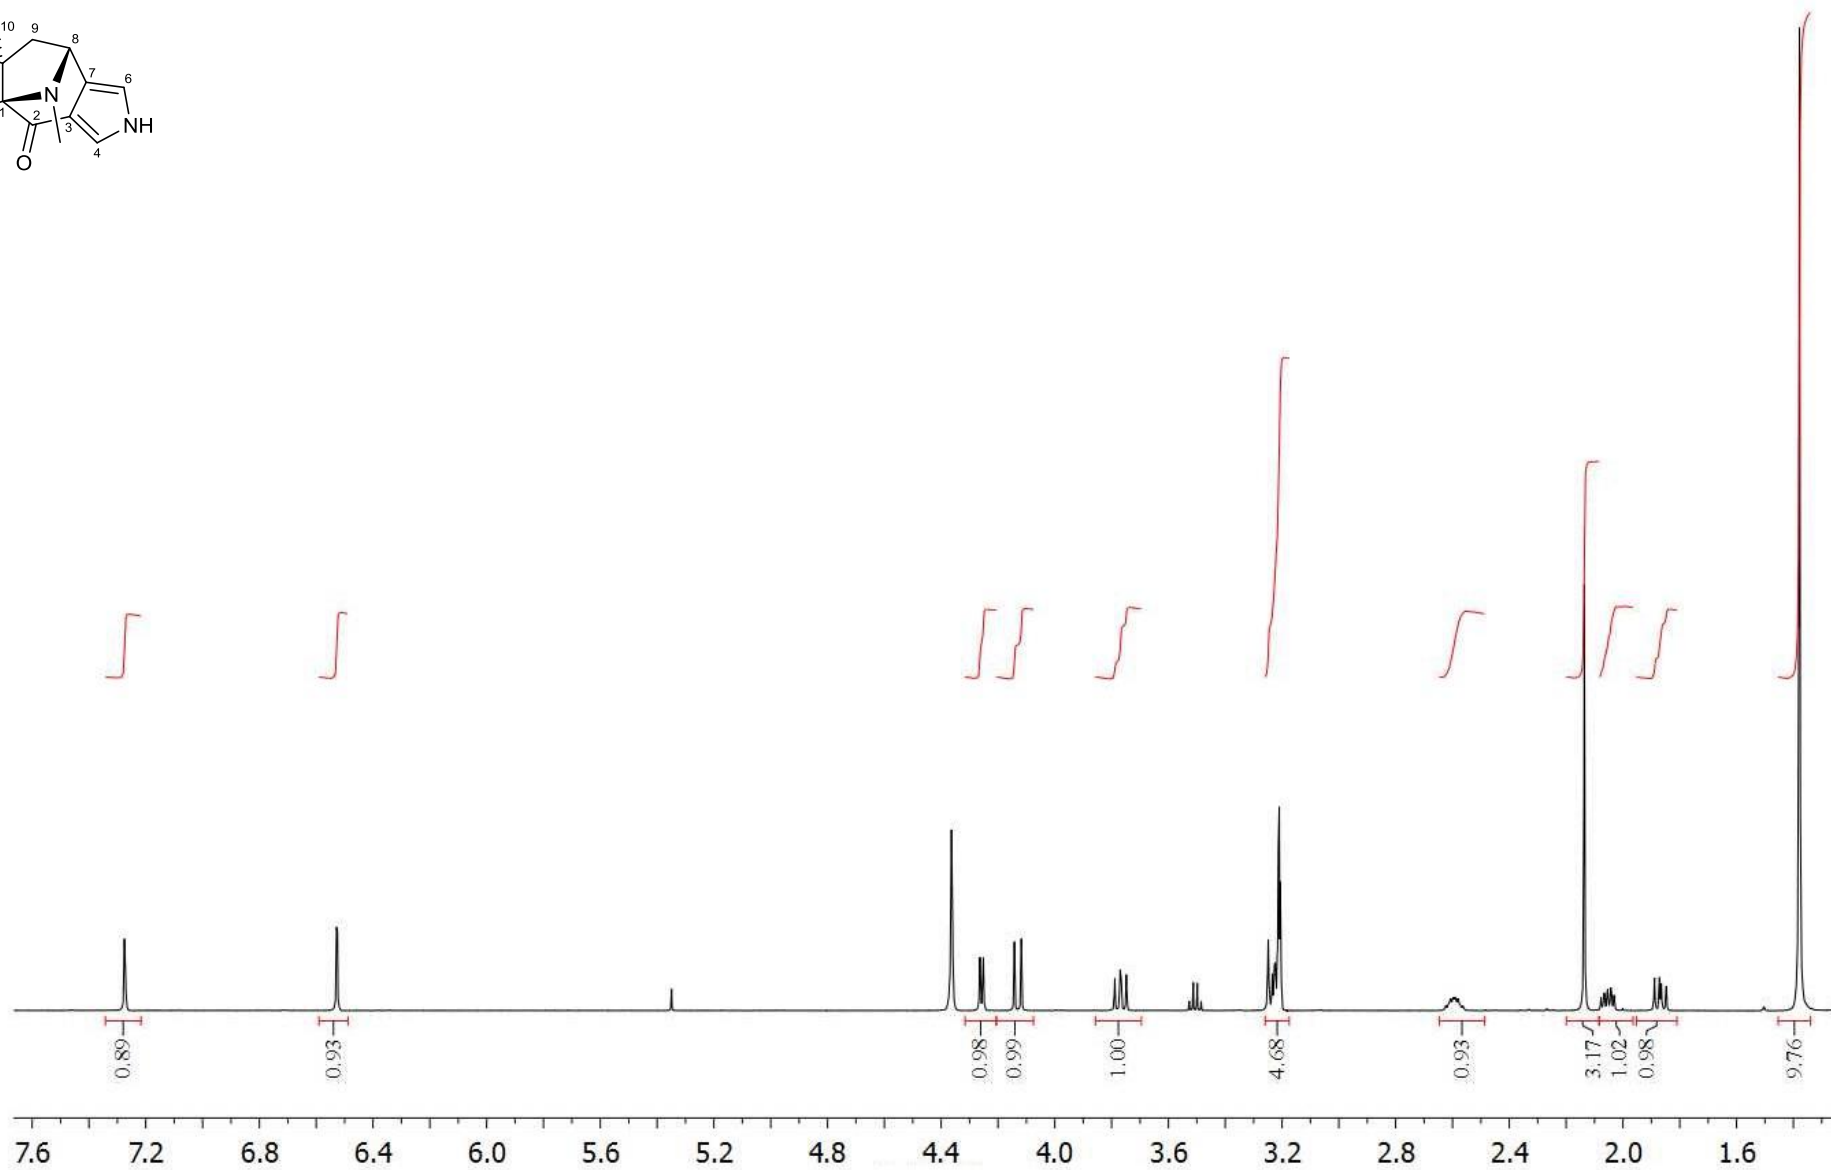

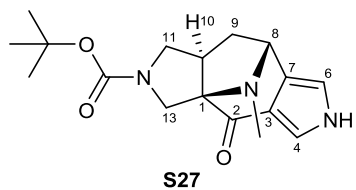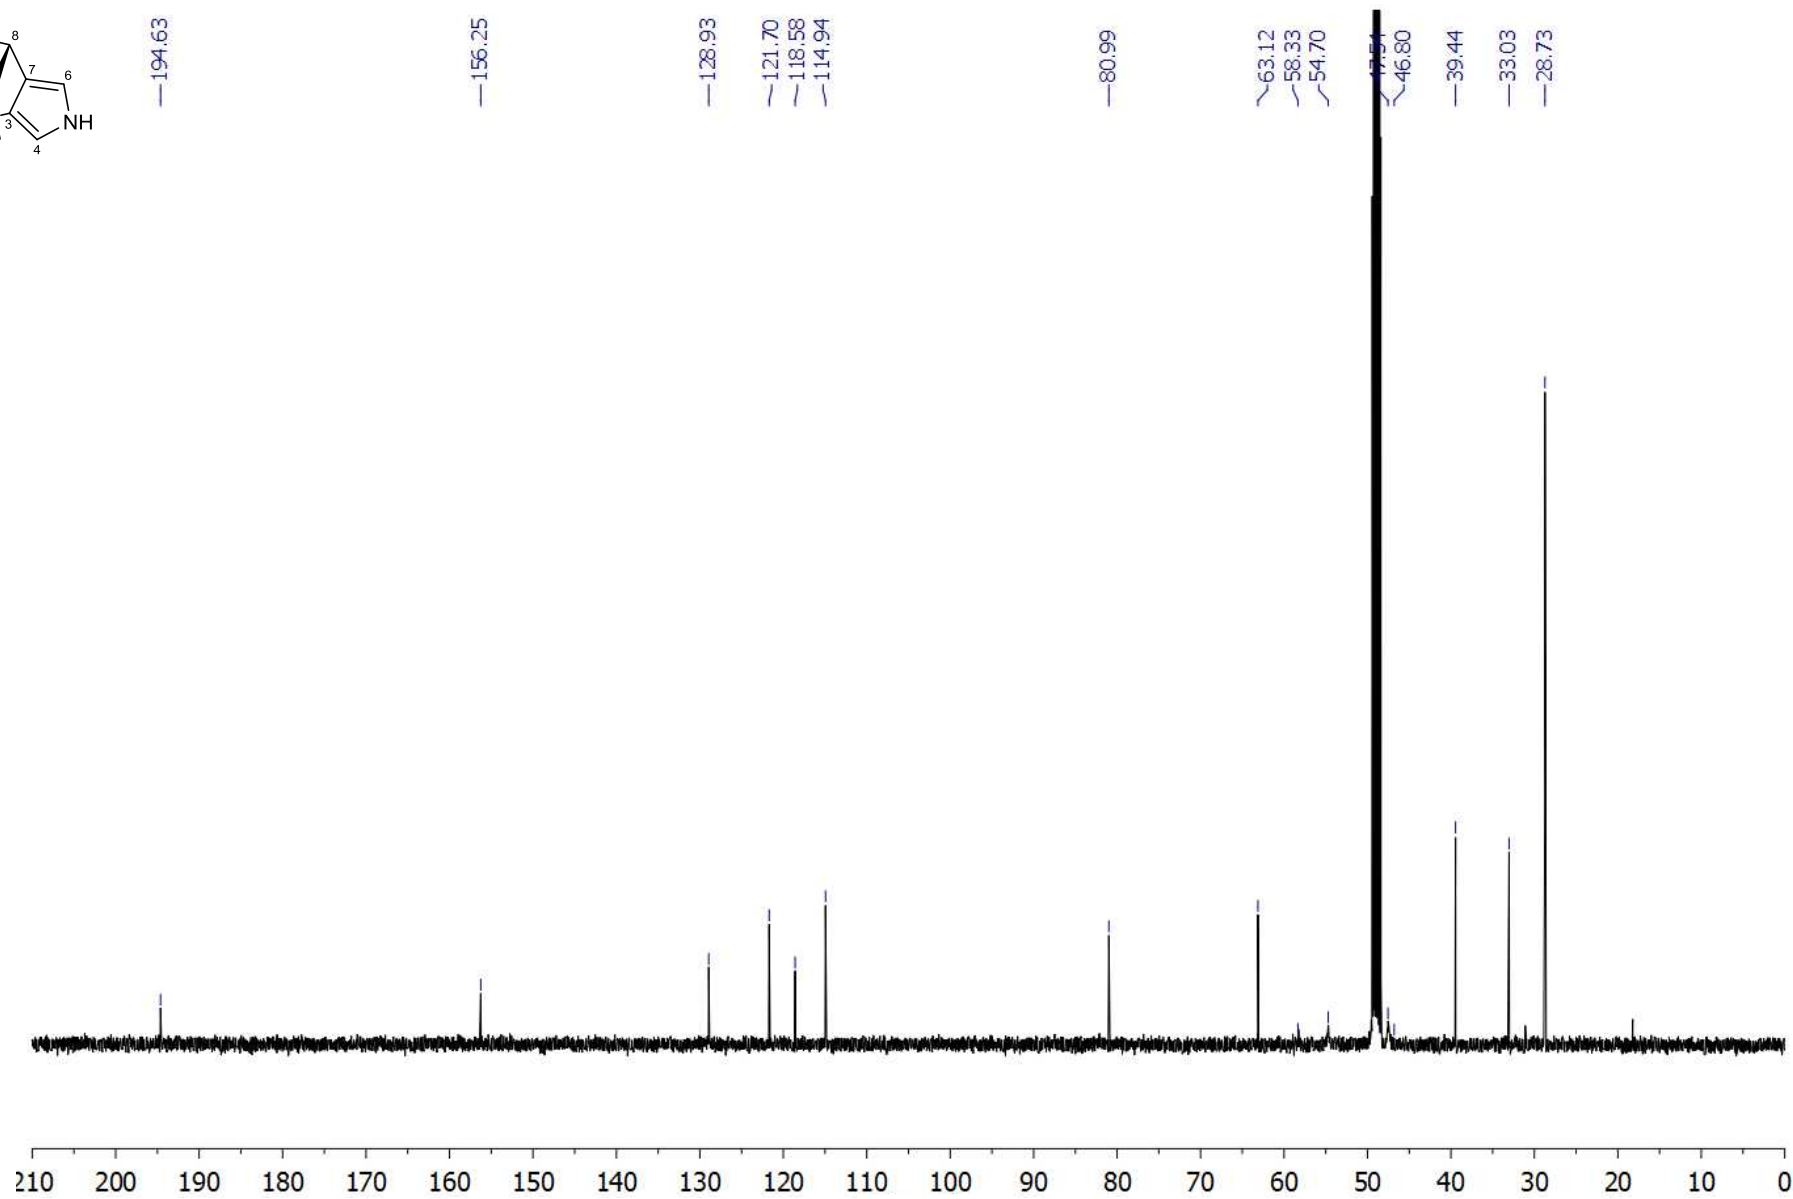

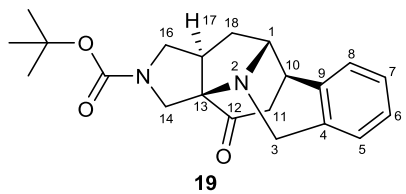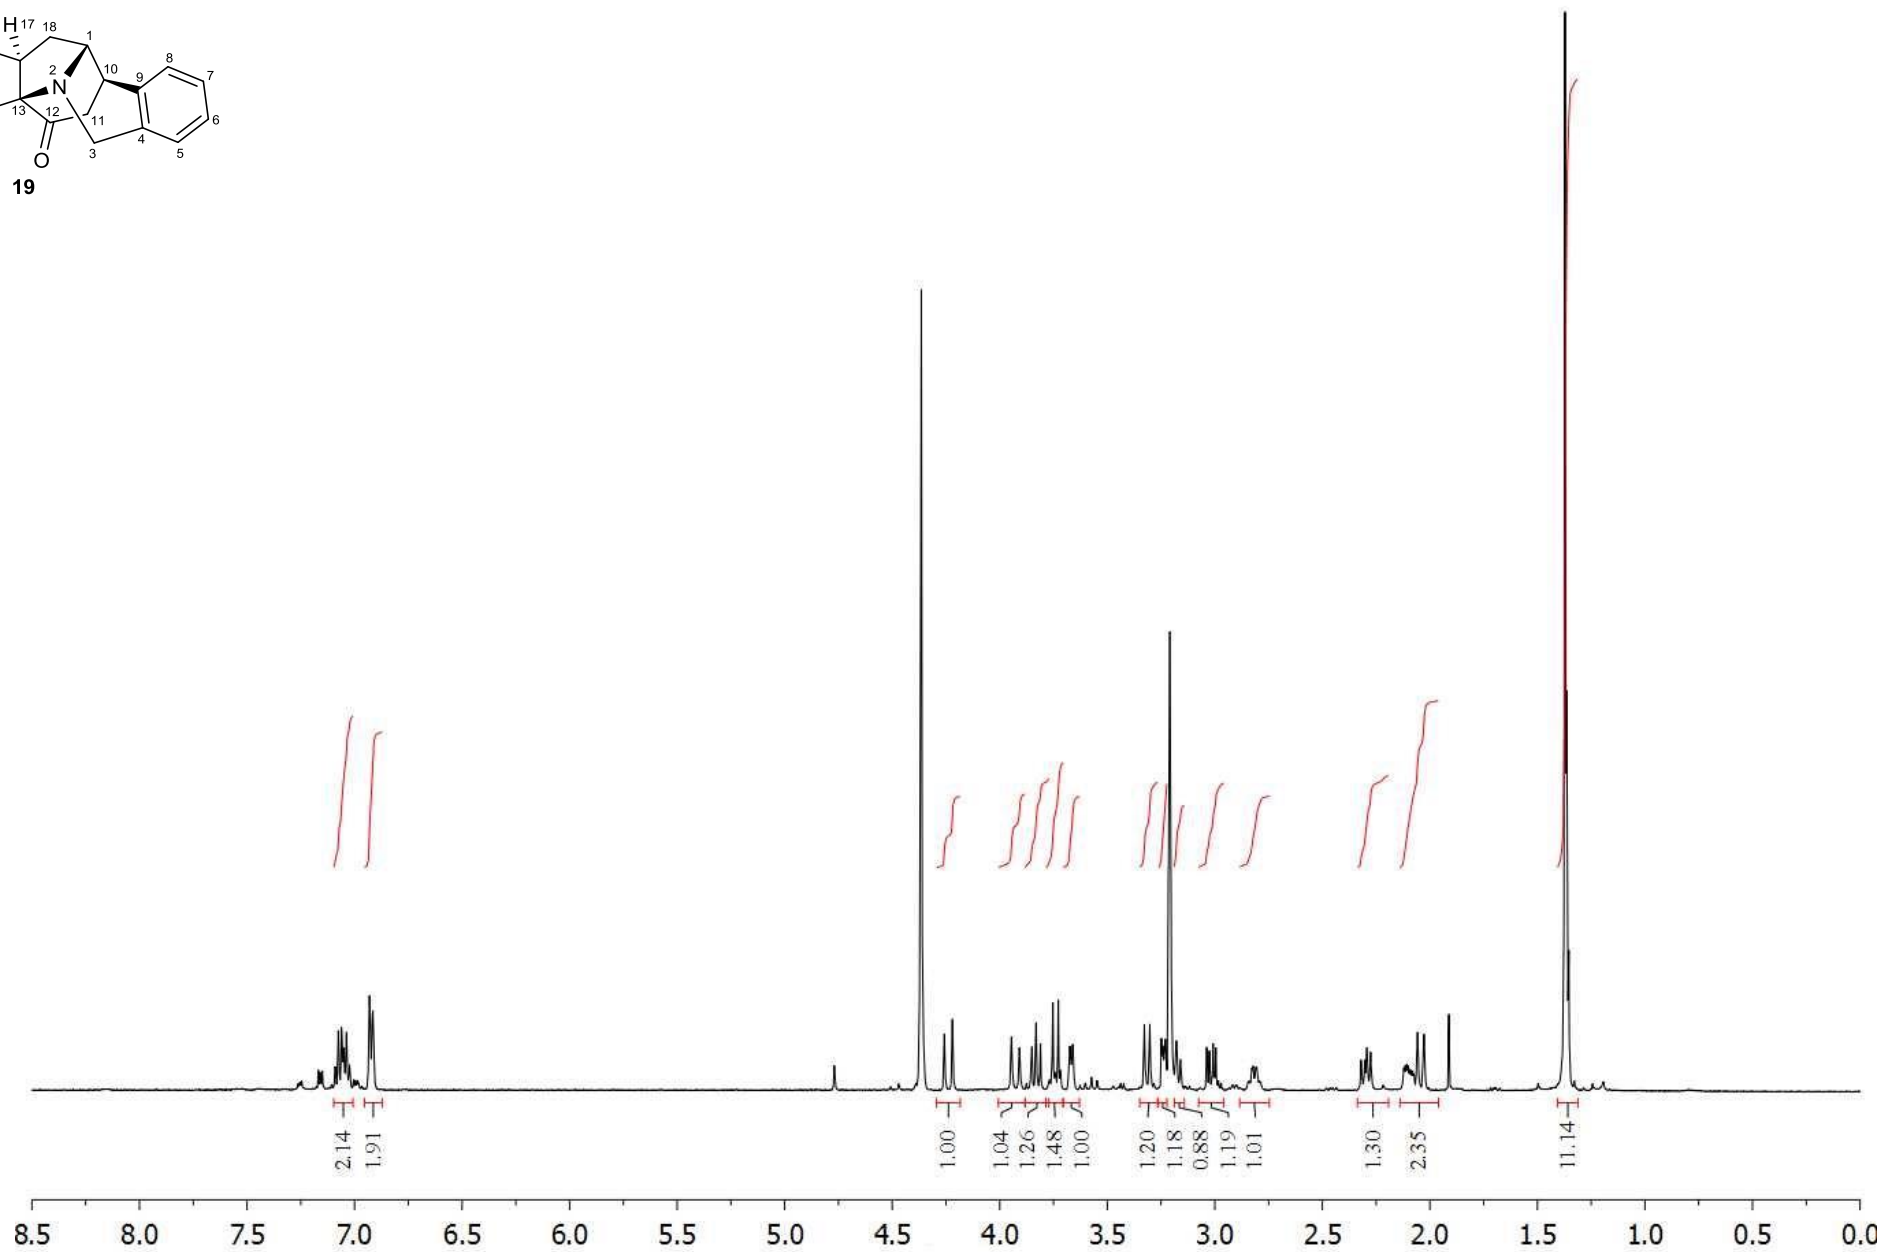

273

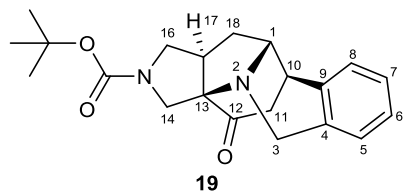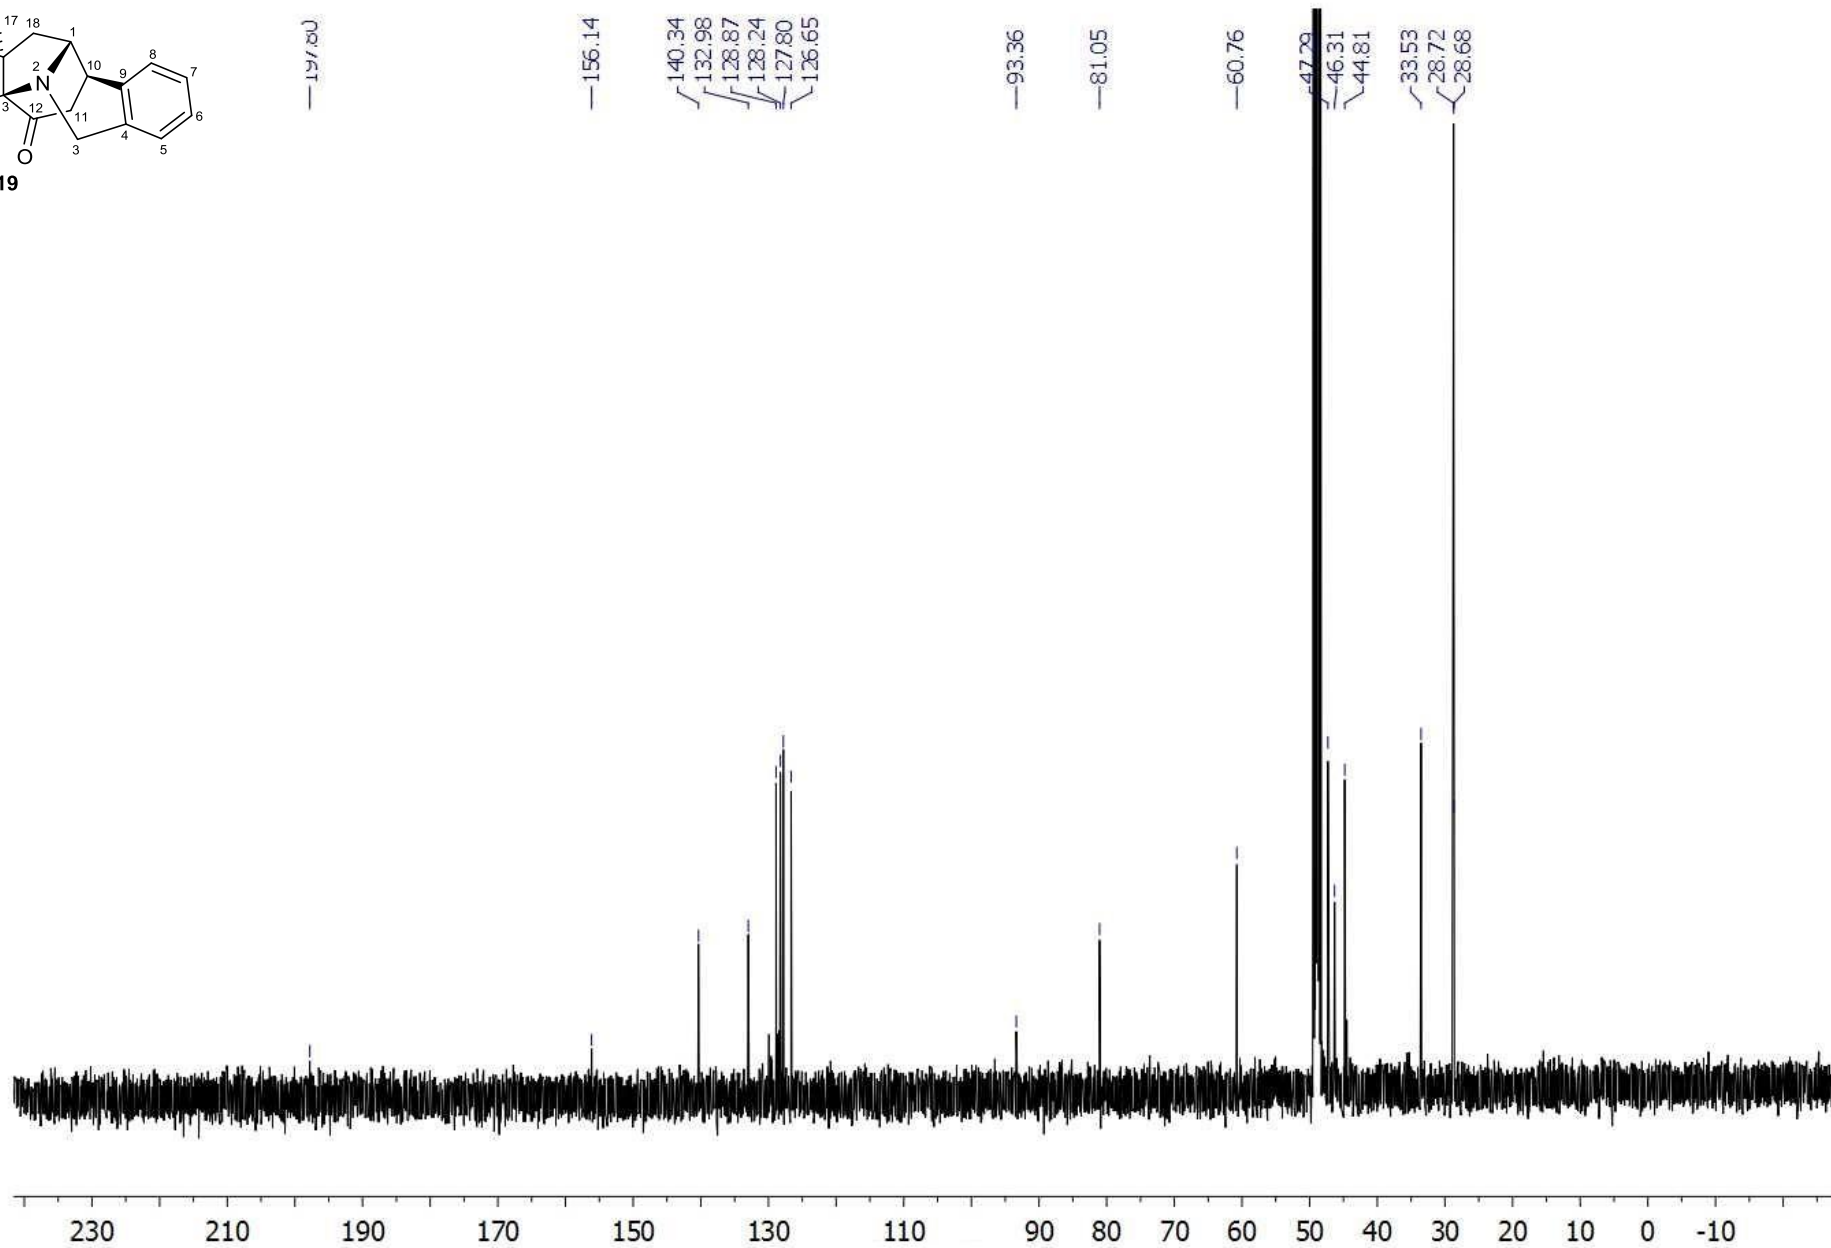

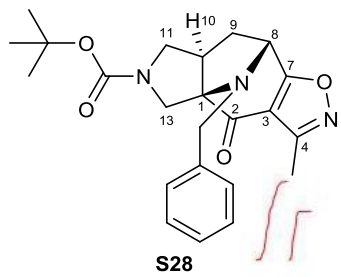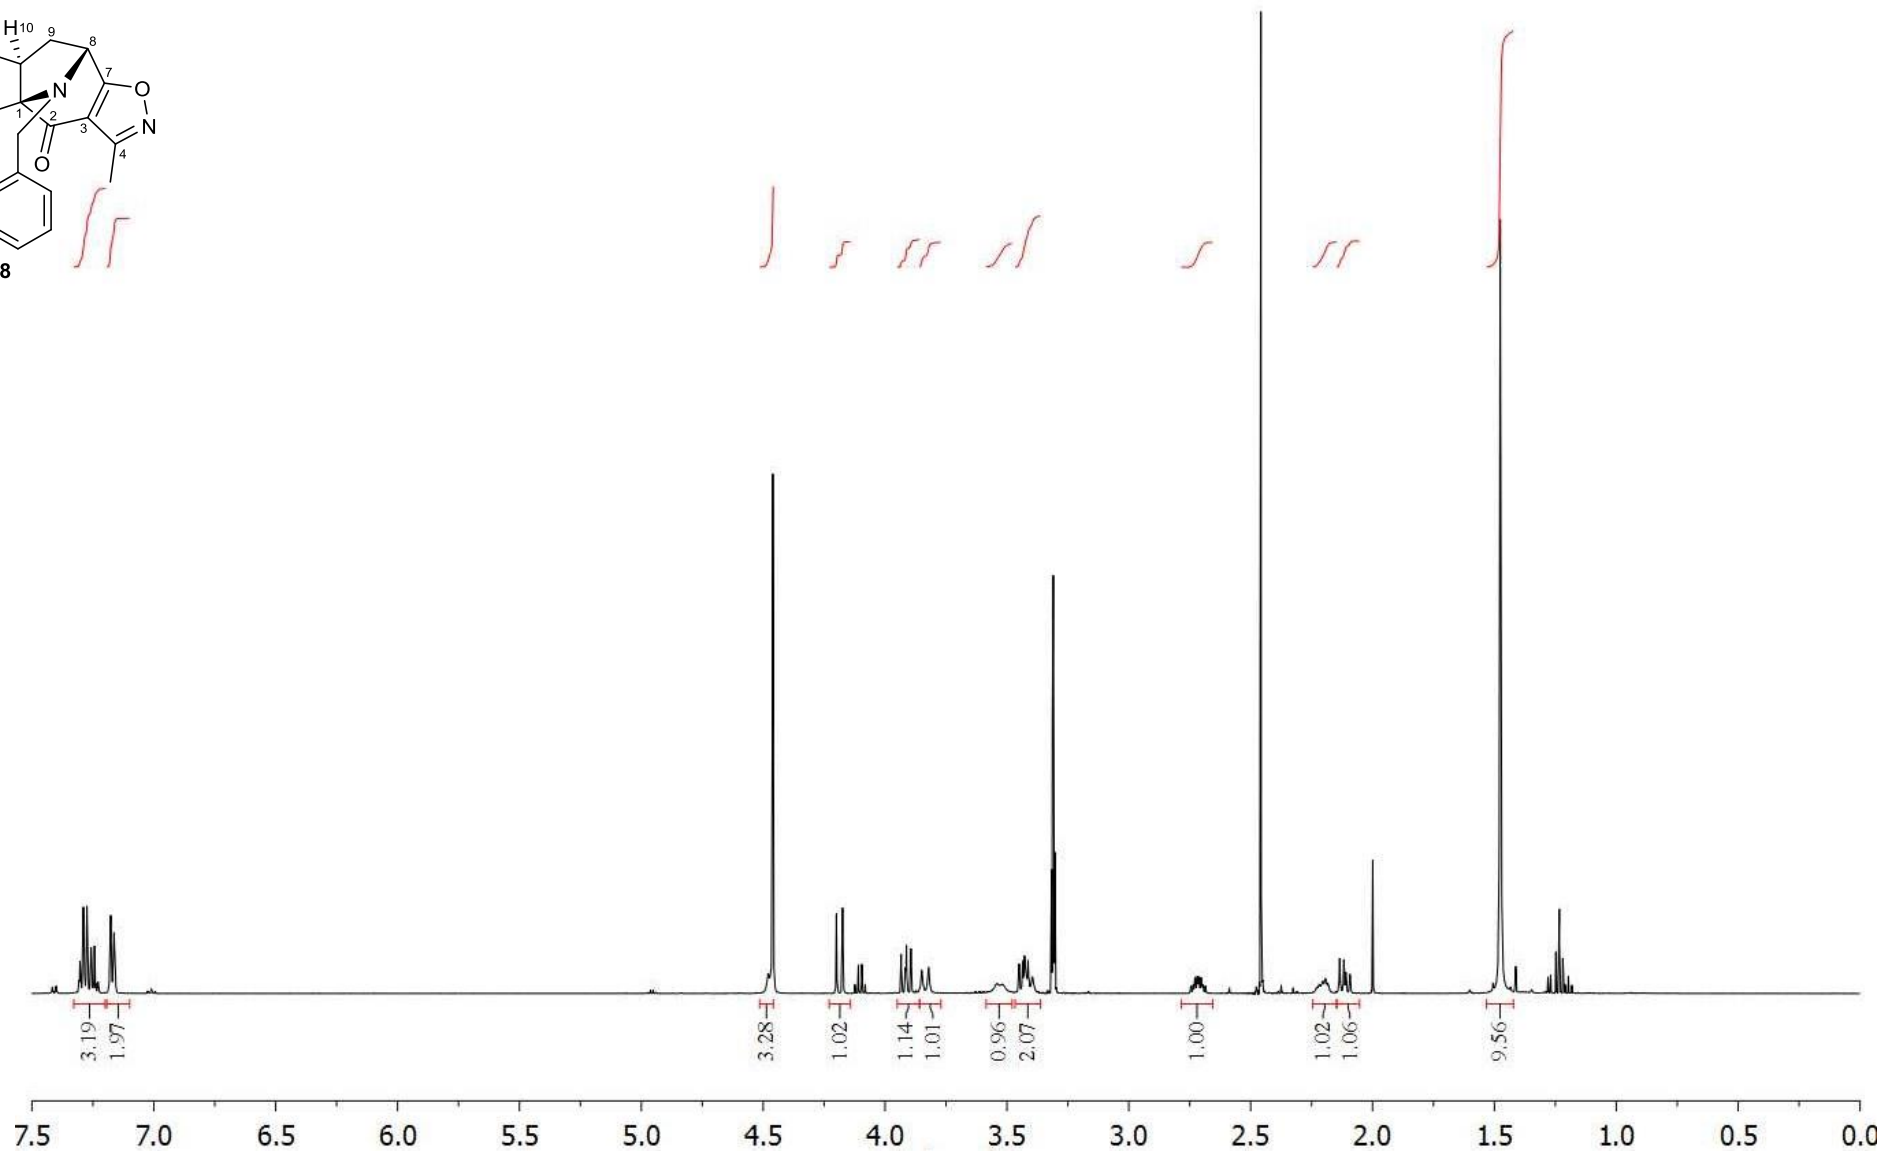



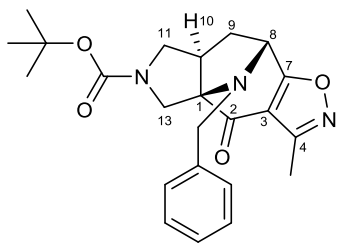

**S28**

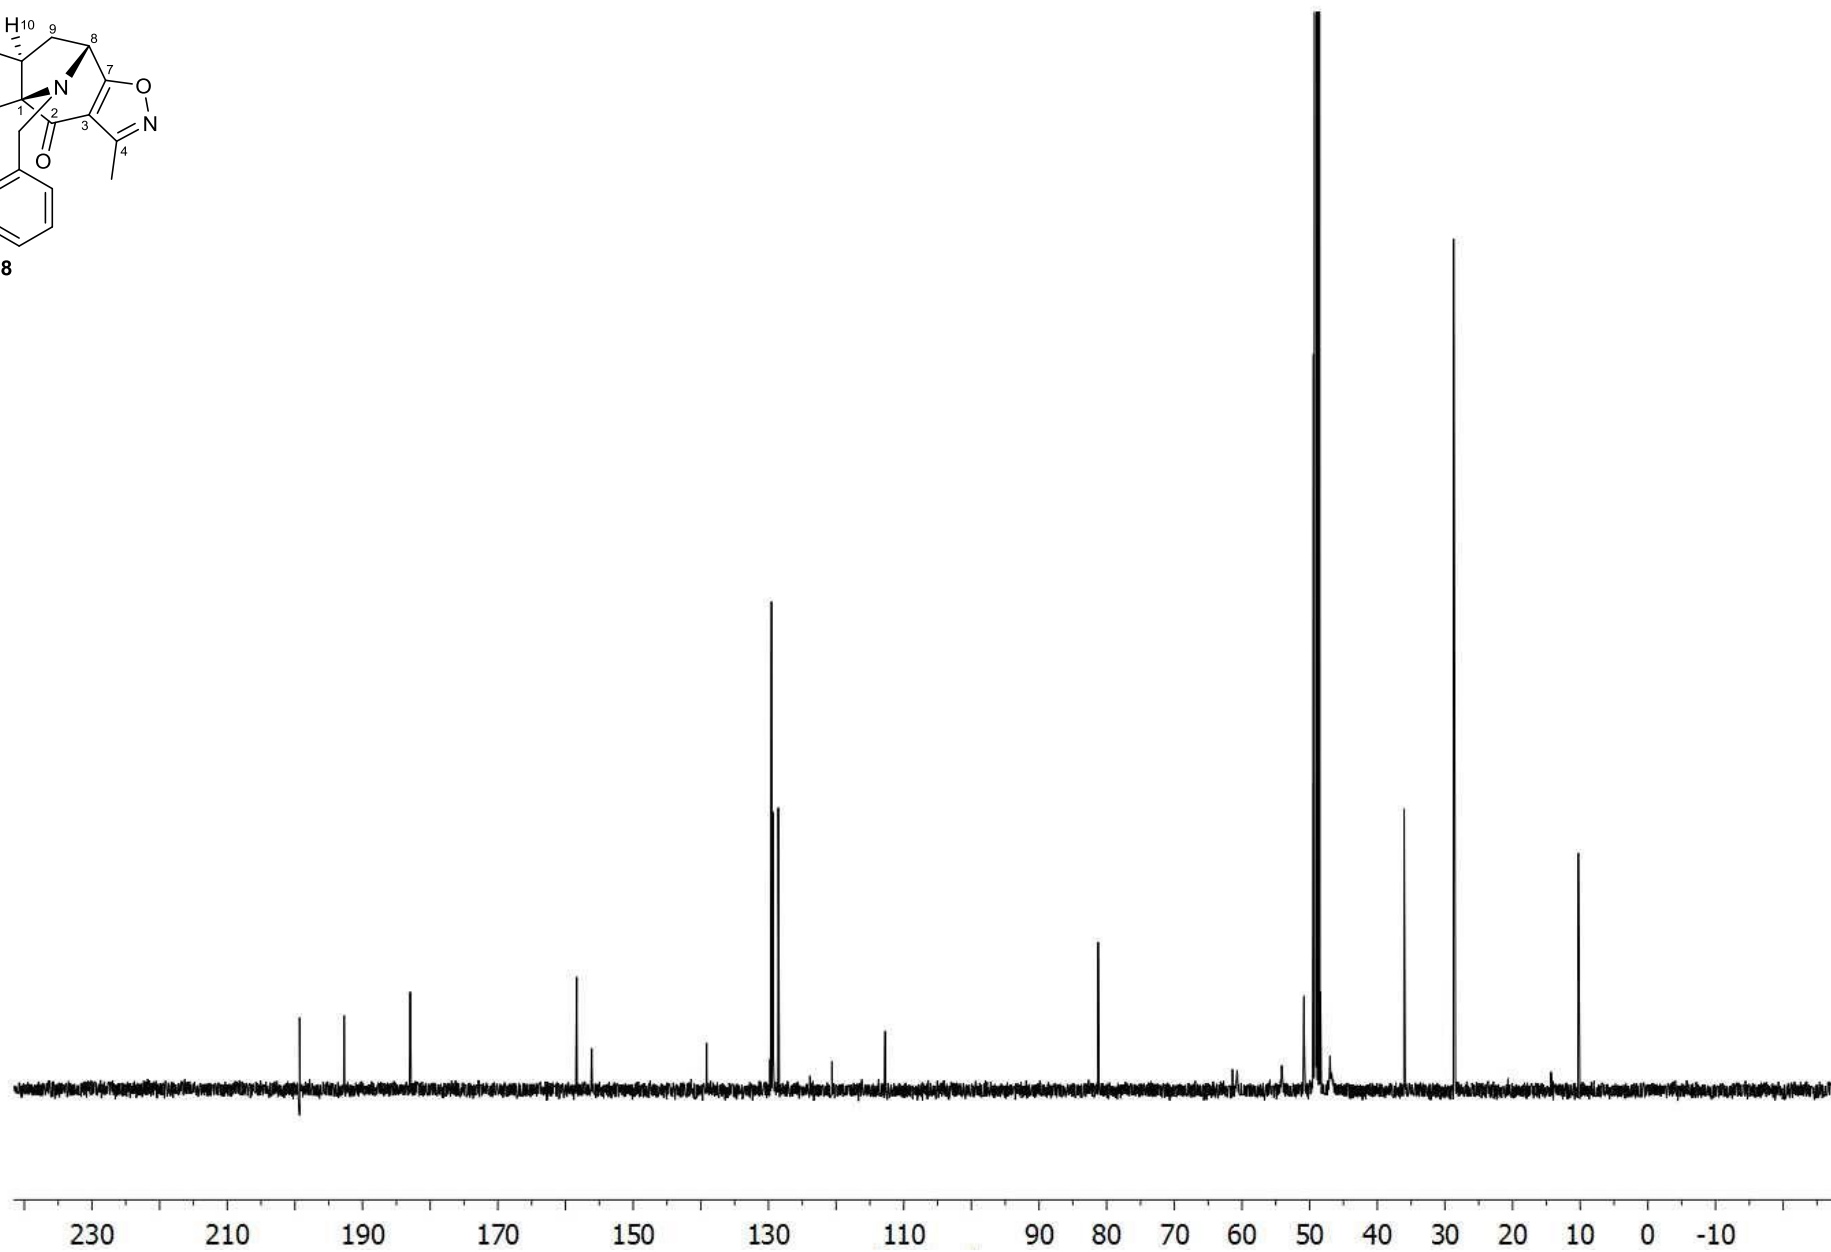

276

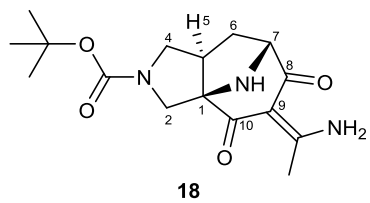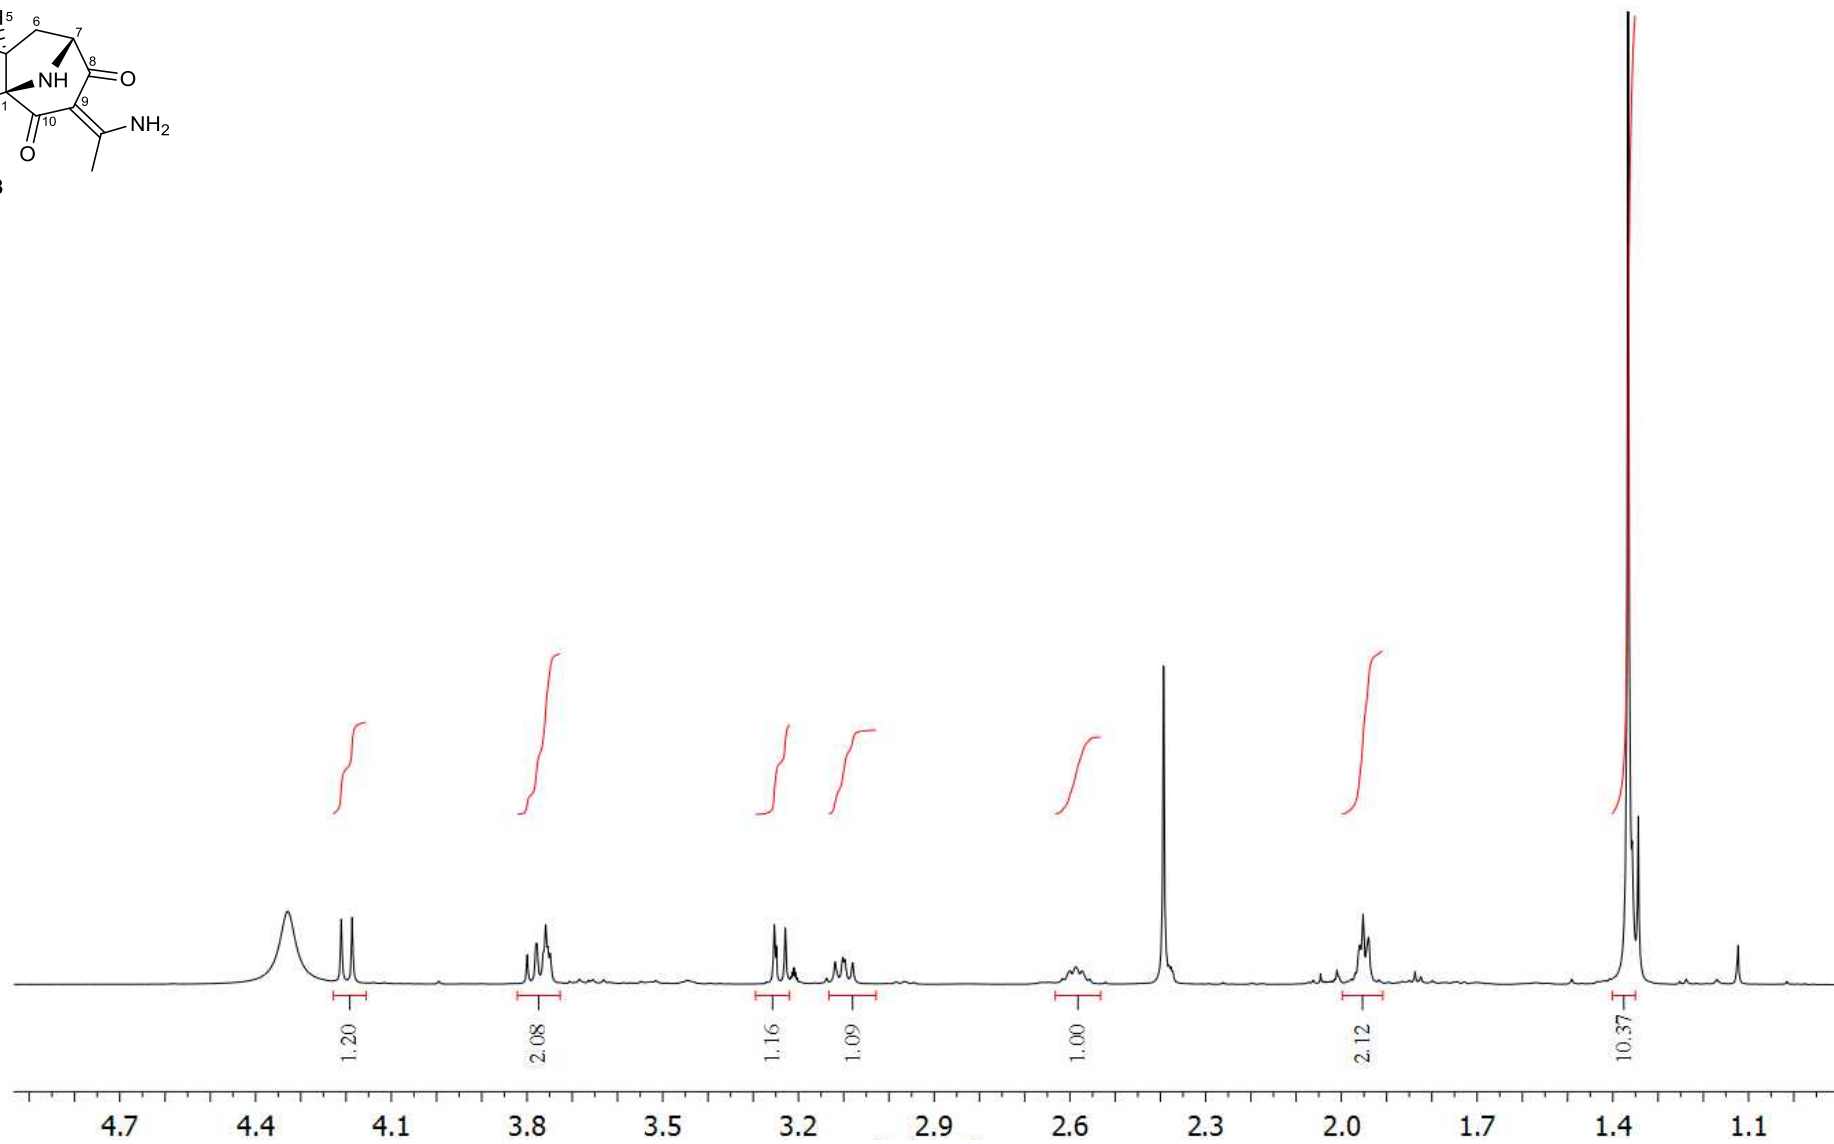

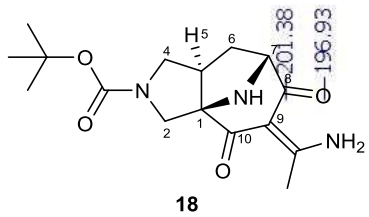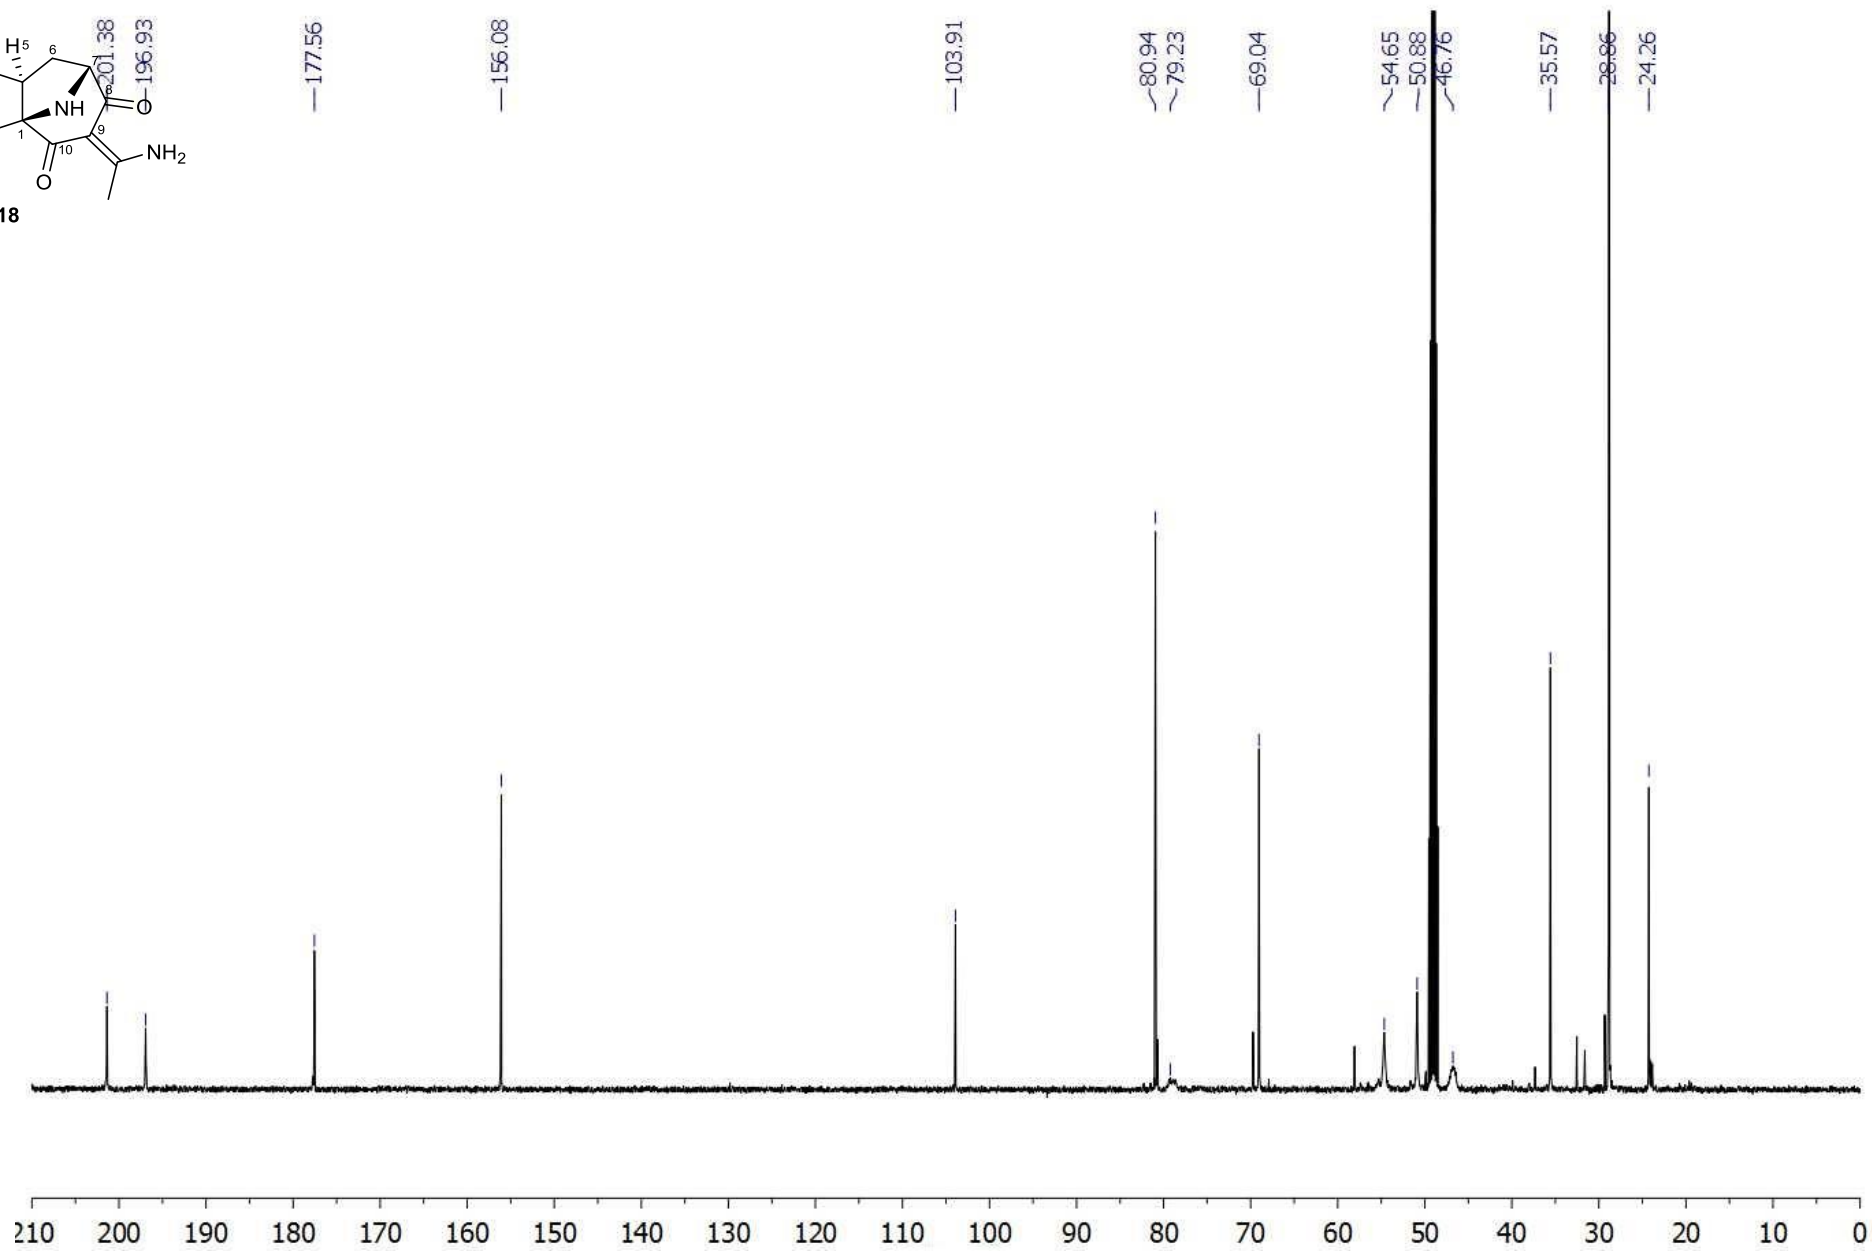

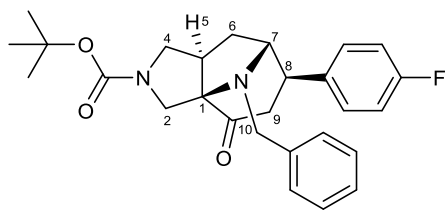

S29

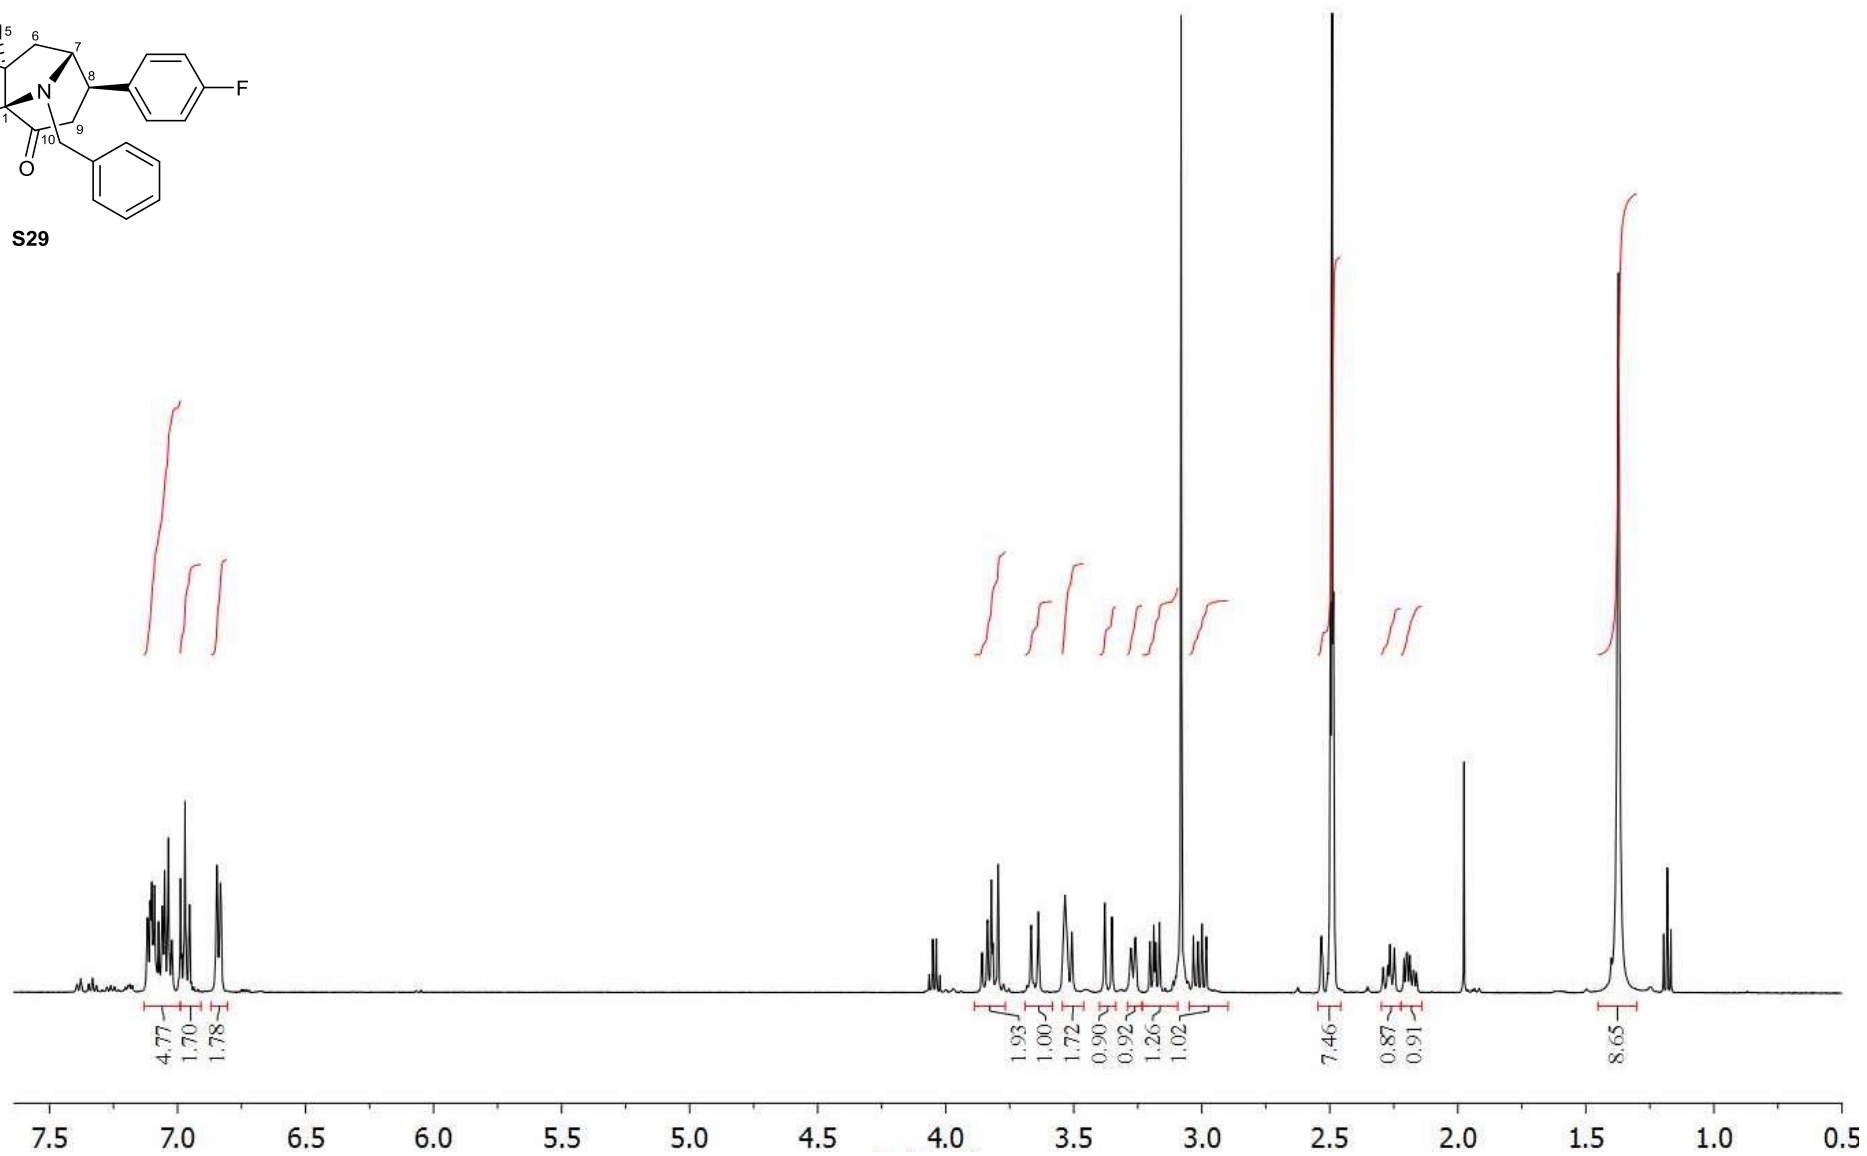

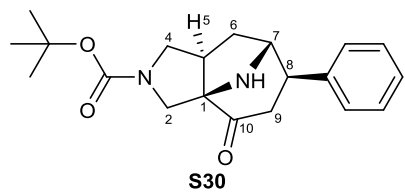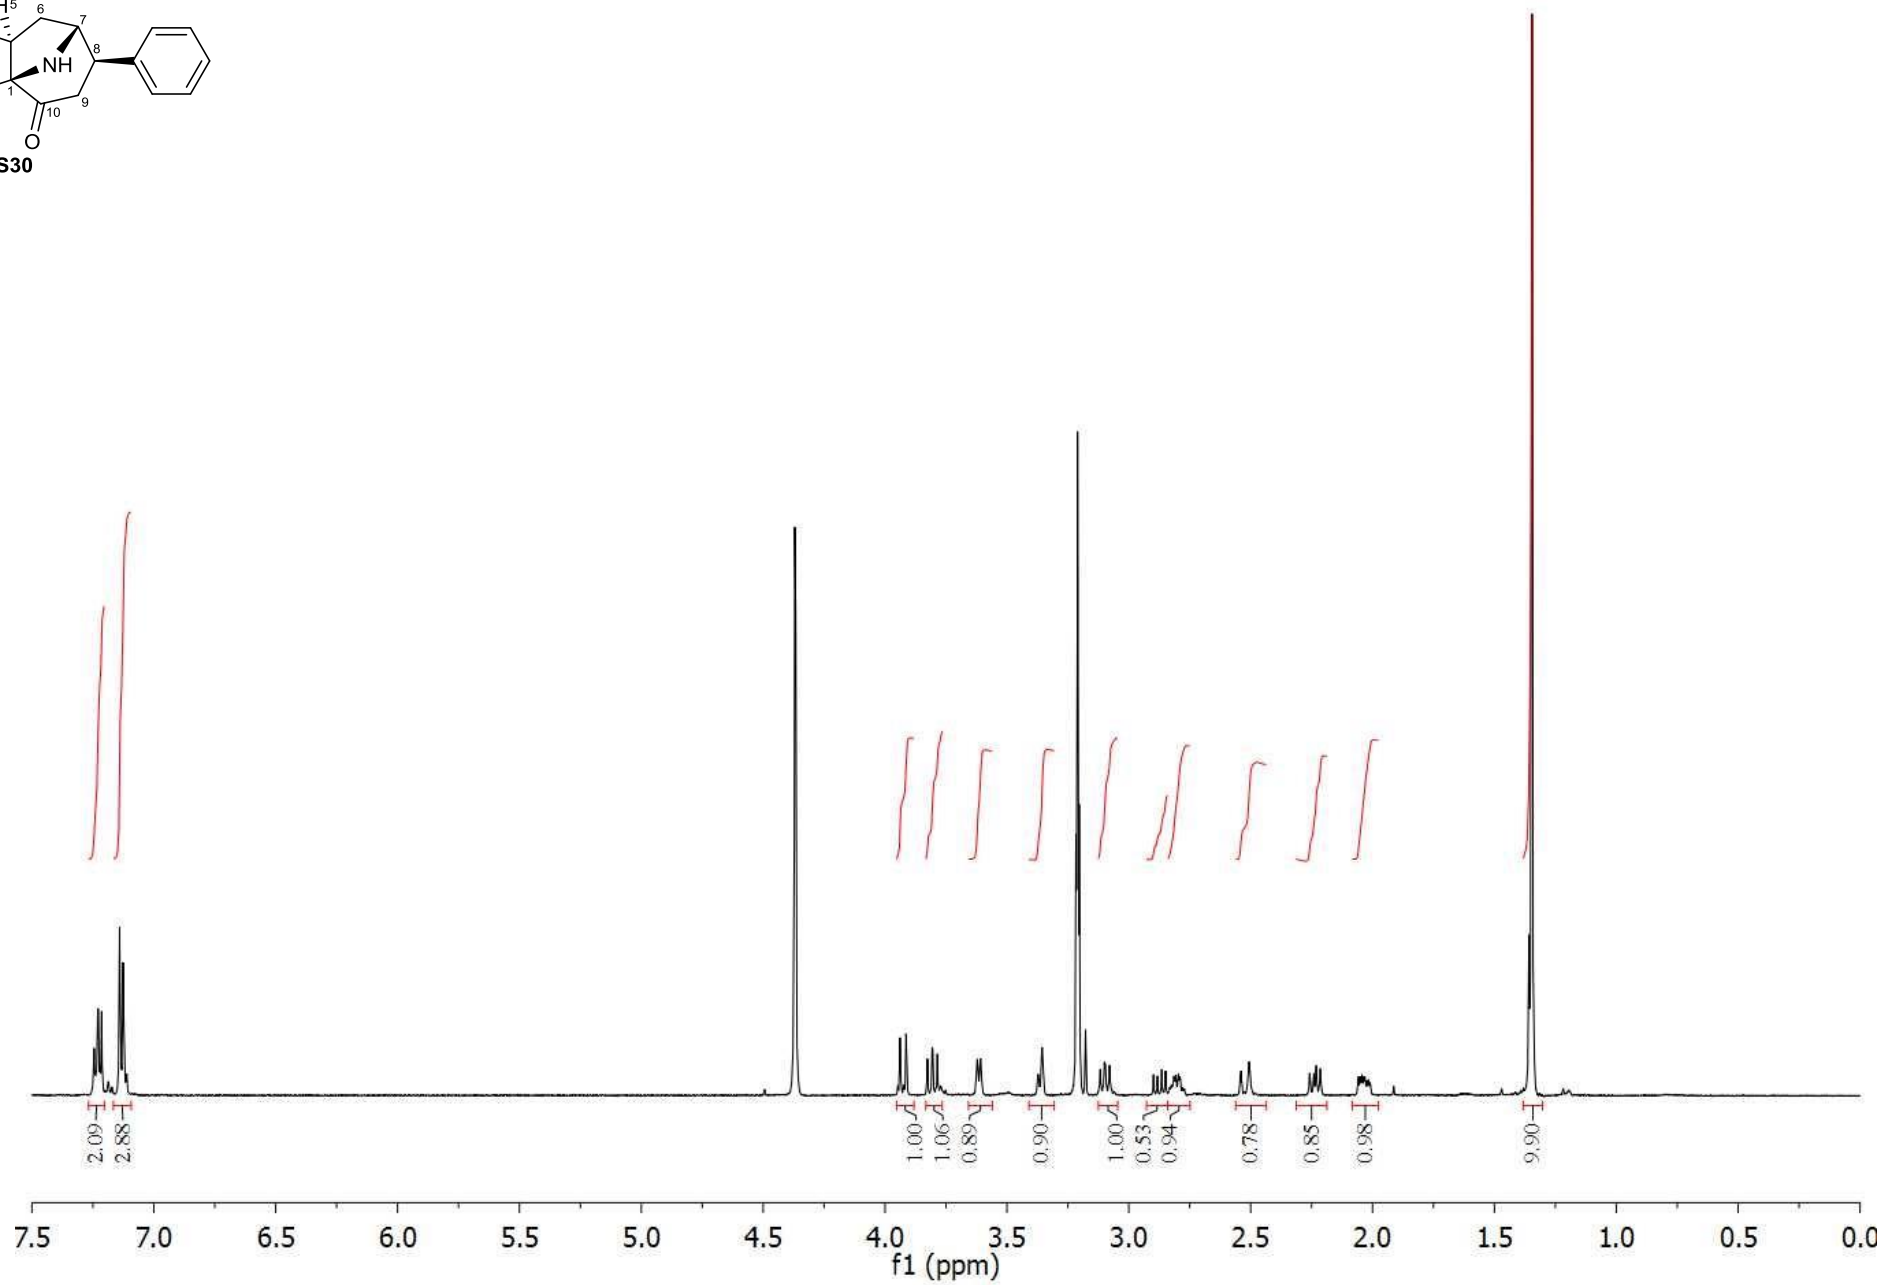

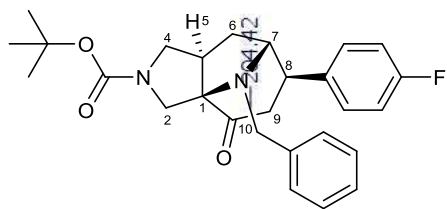

S29

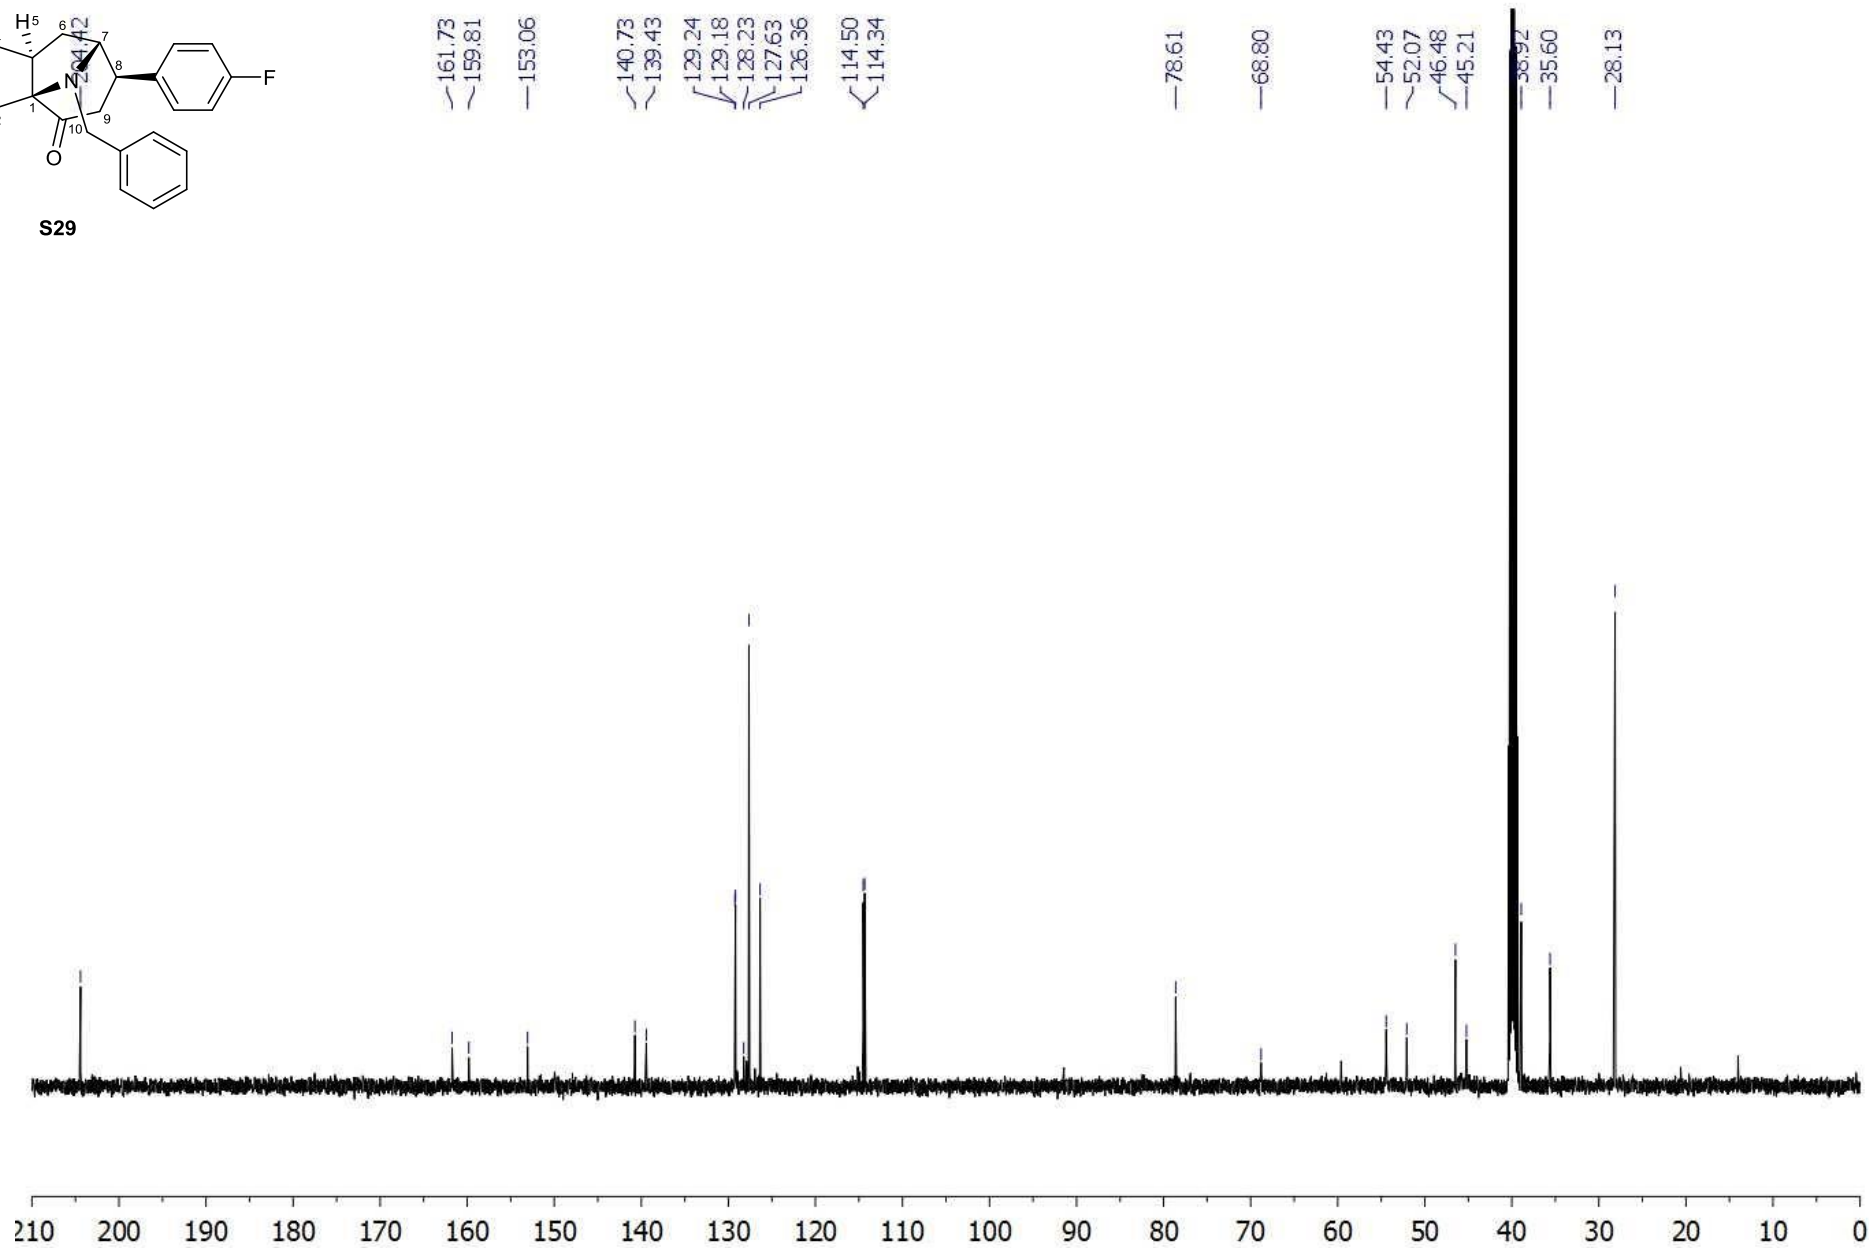

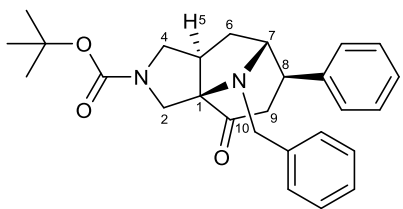

carried forward crude

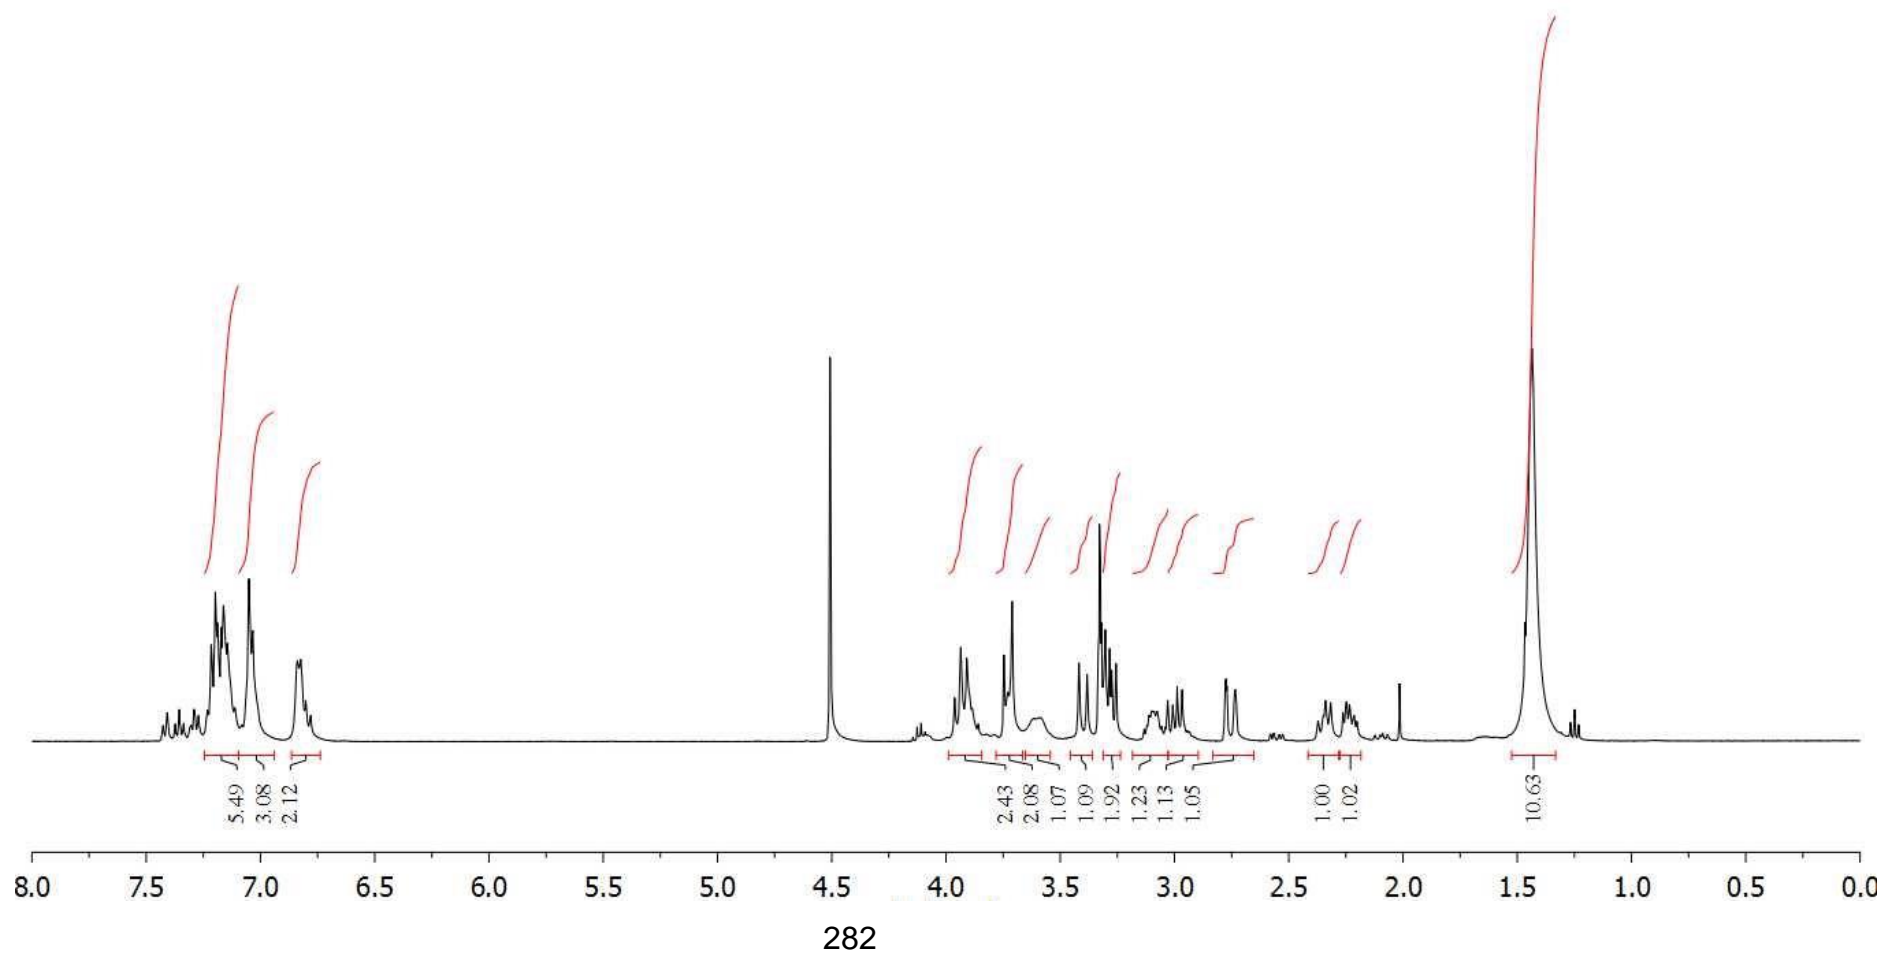

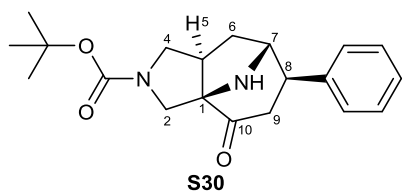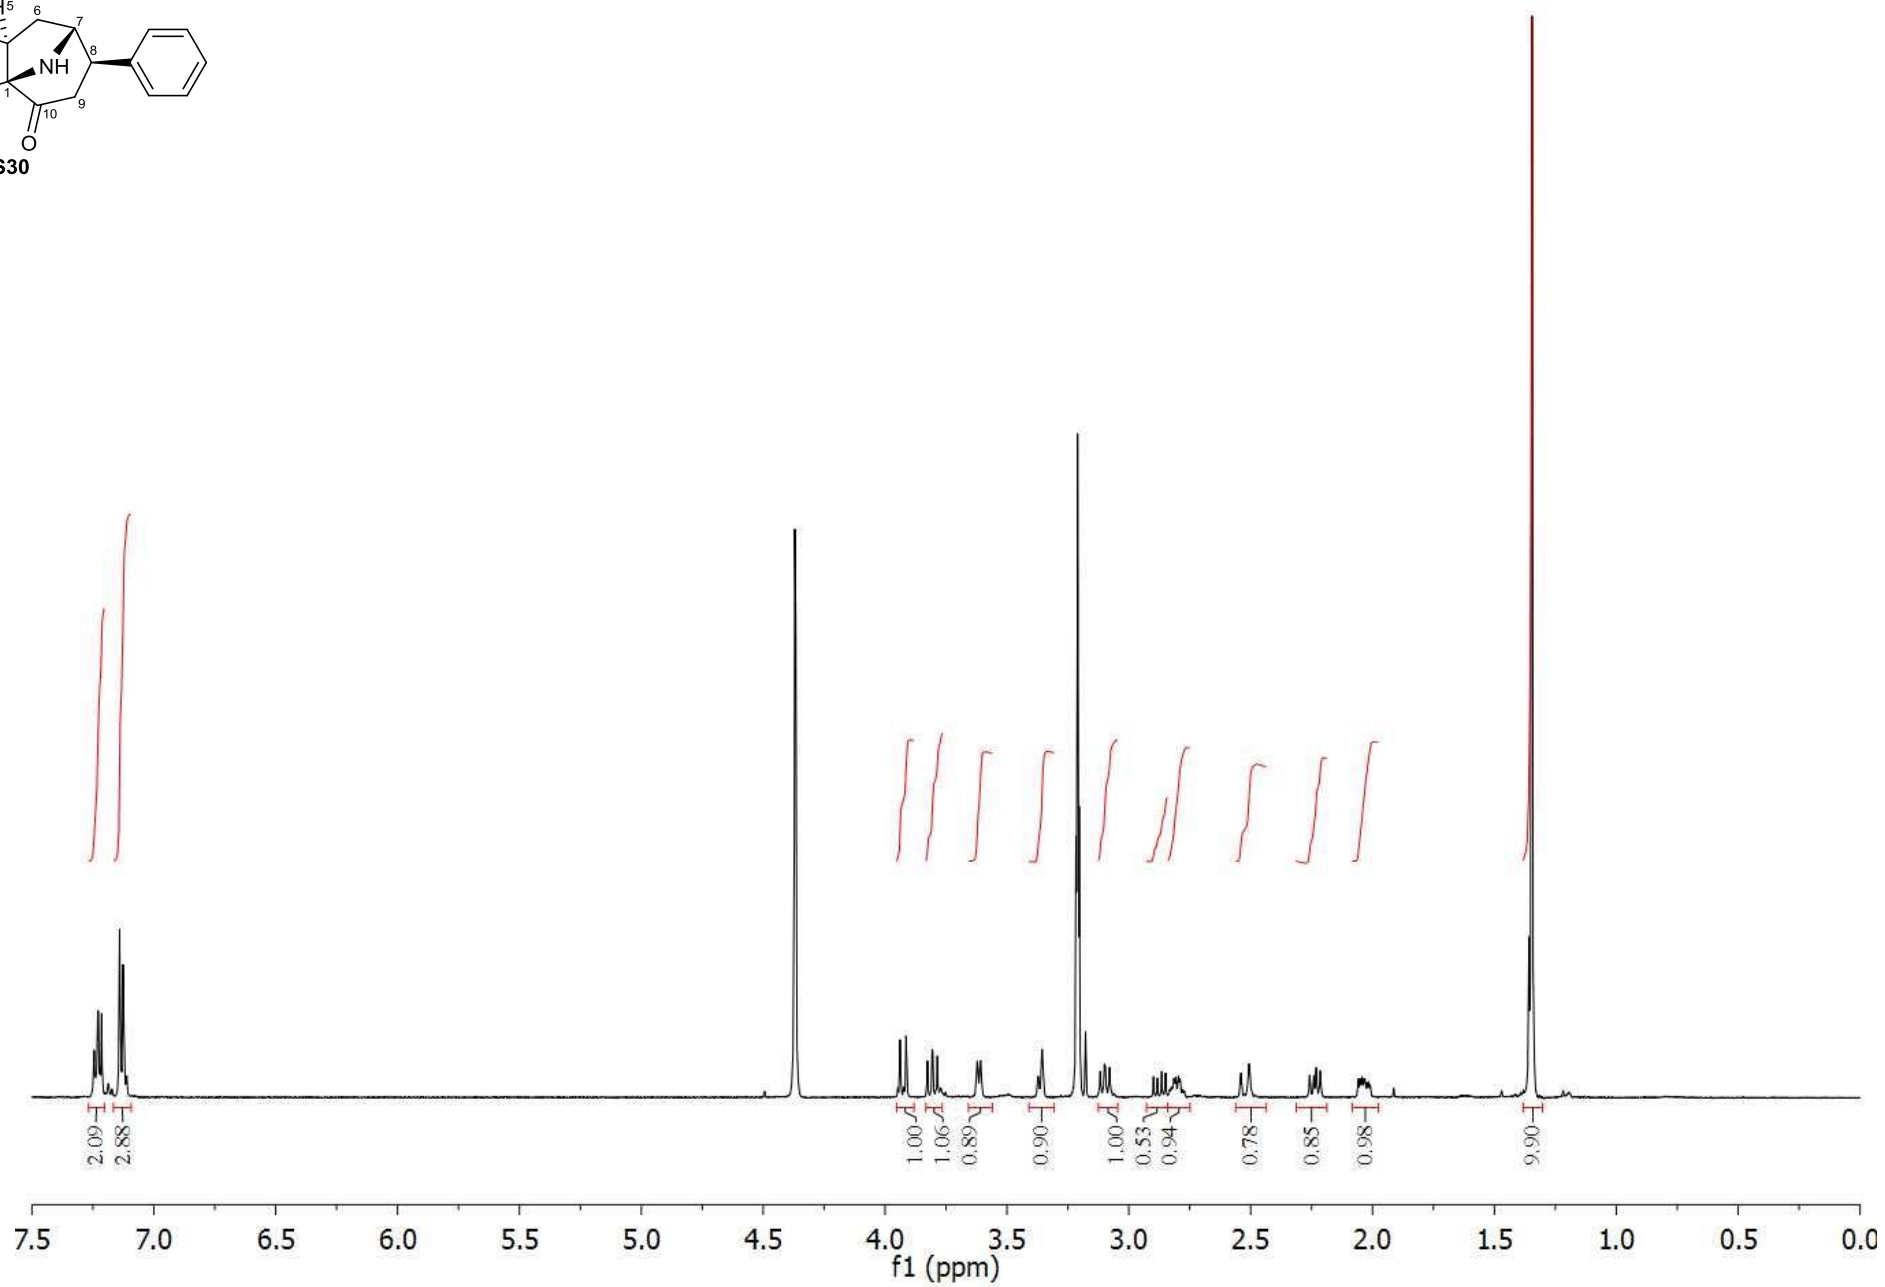



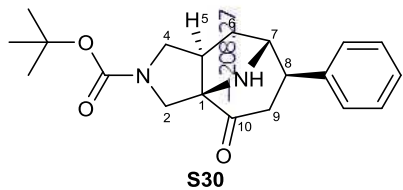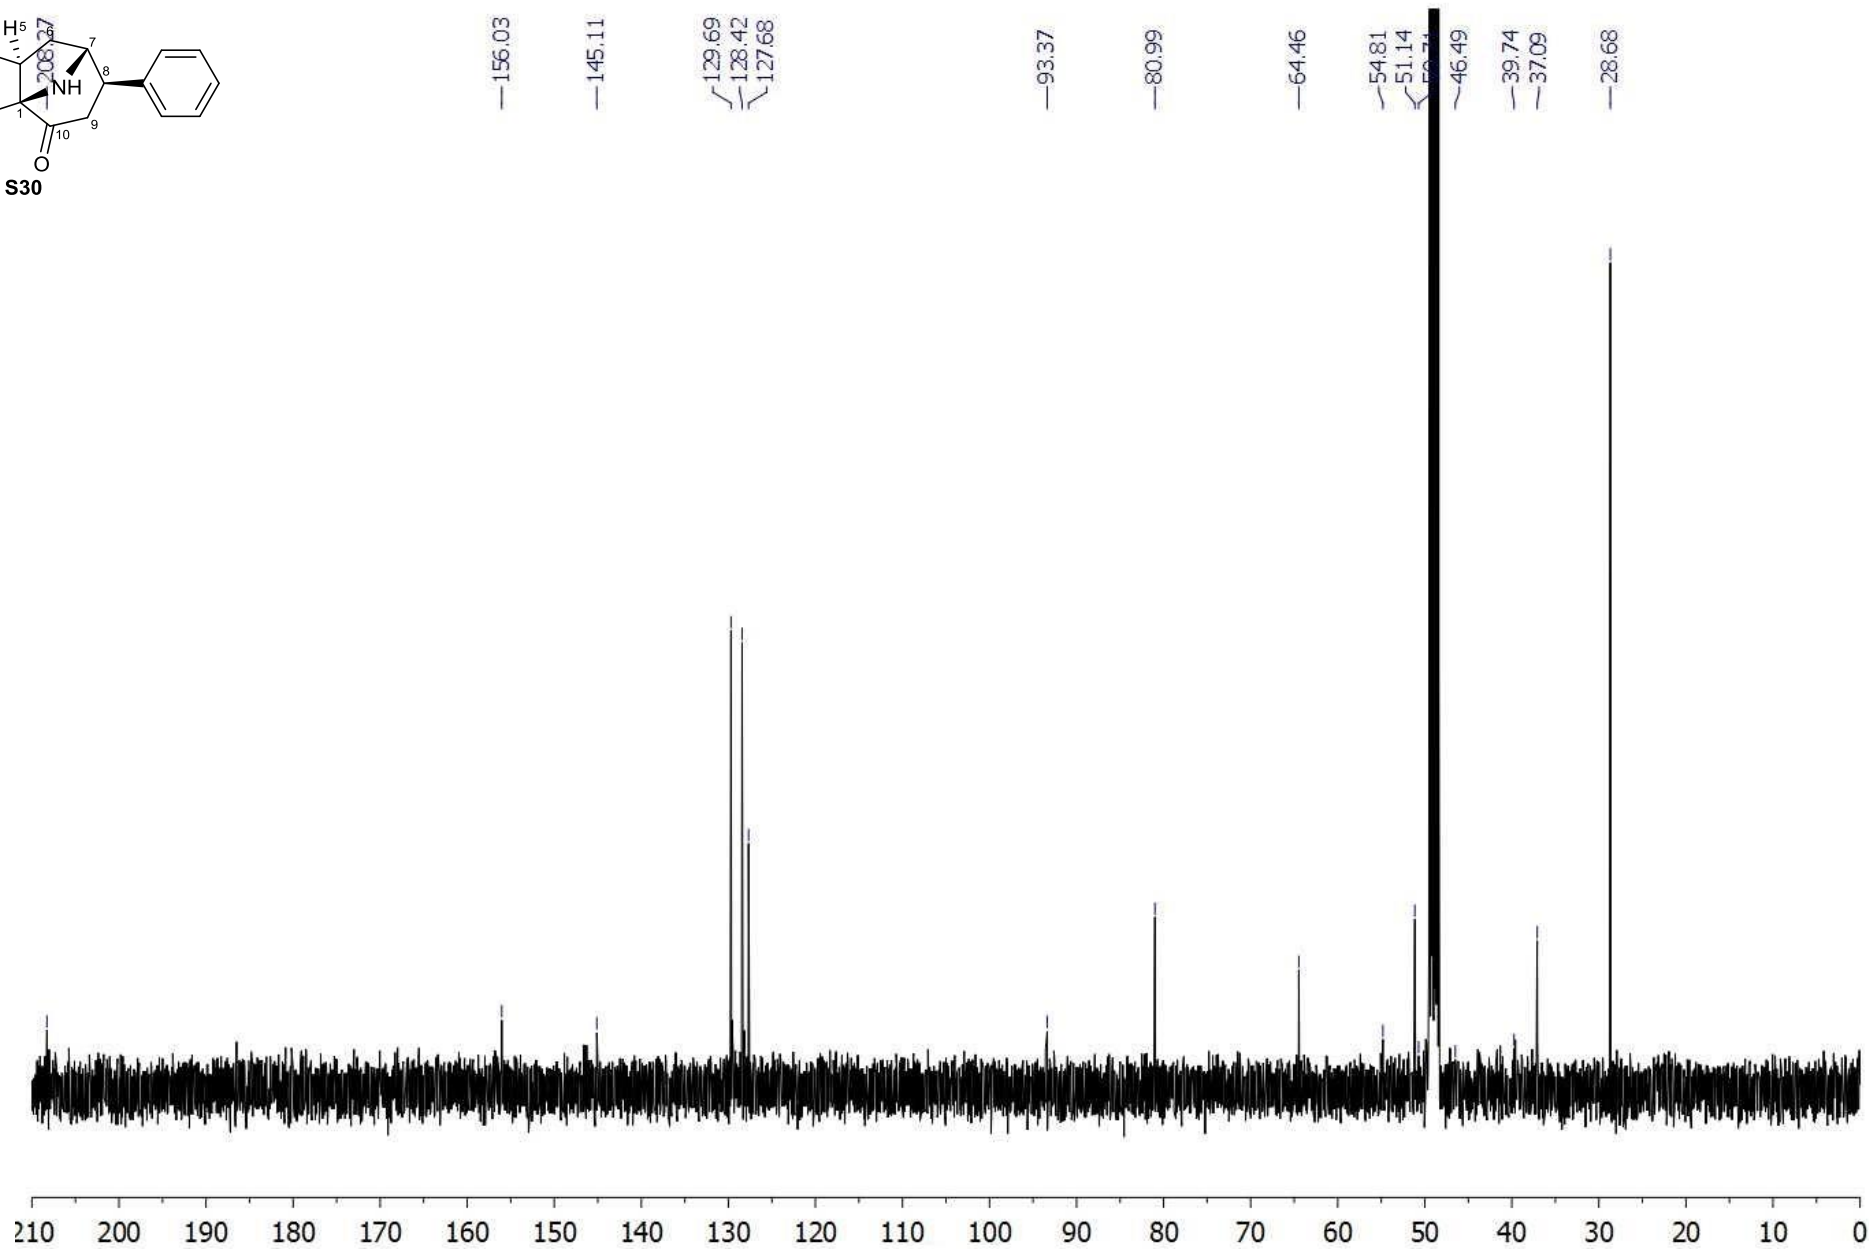

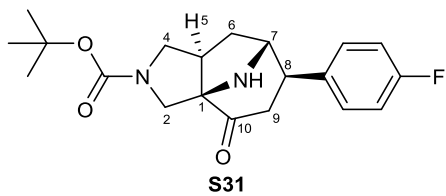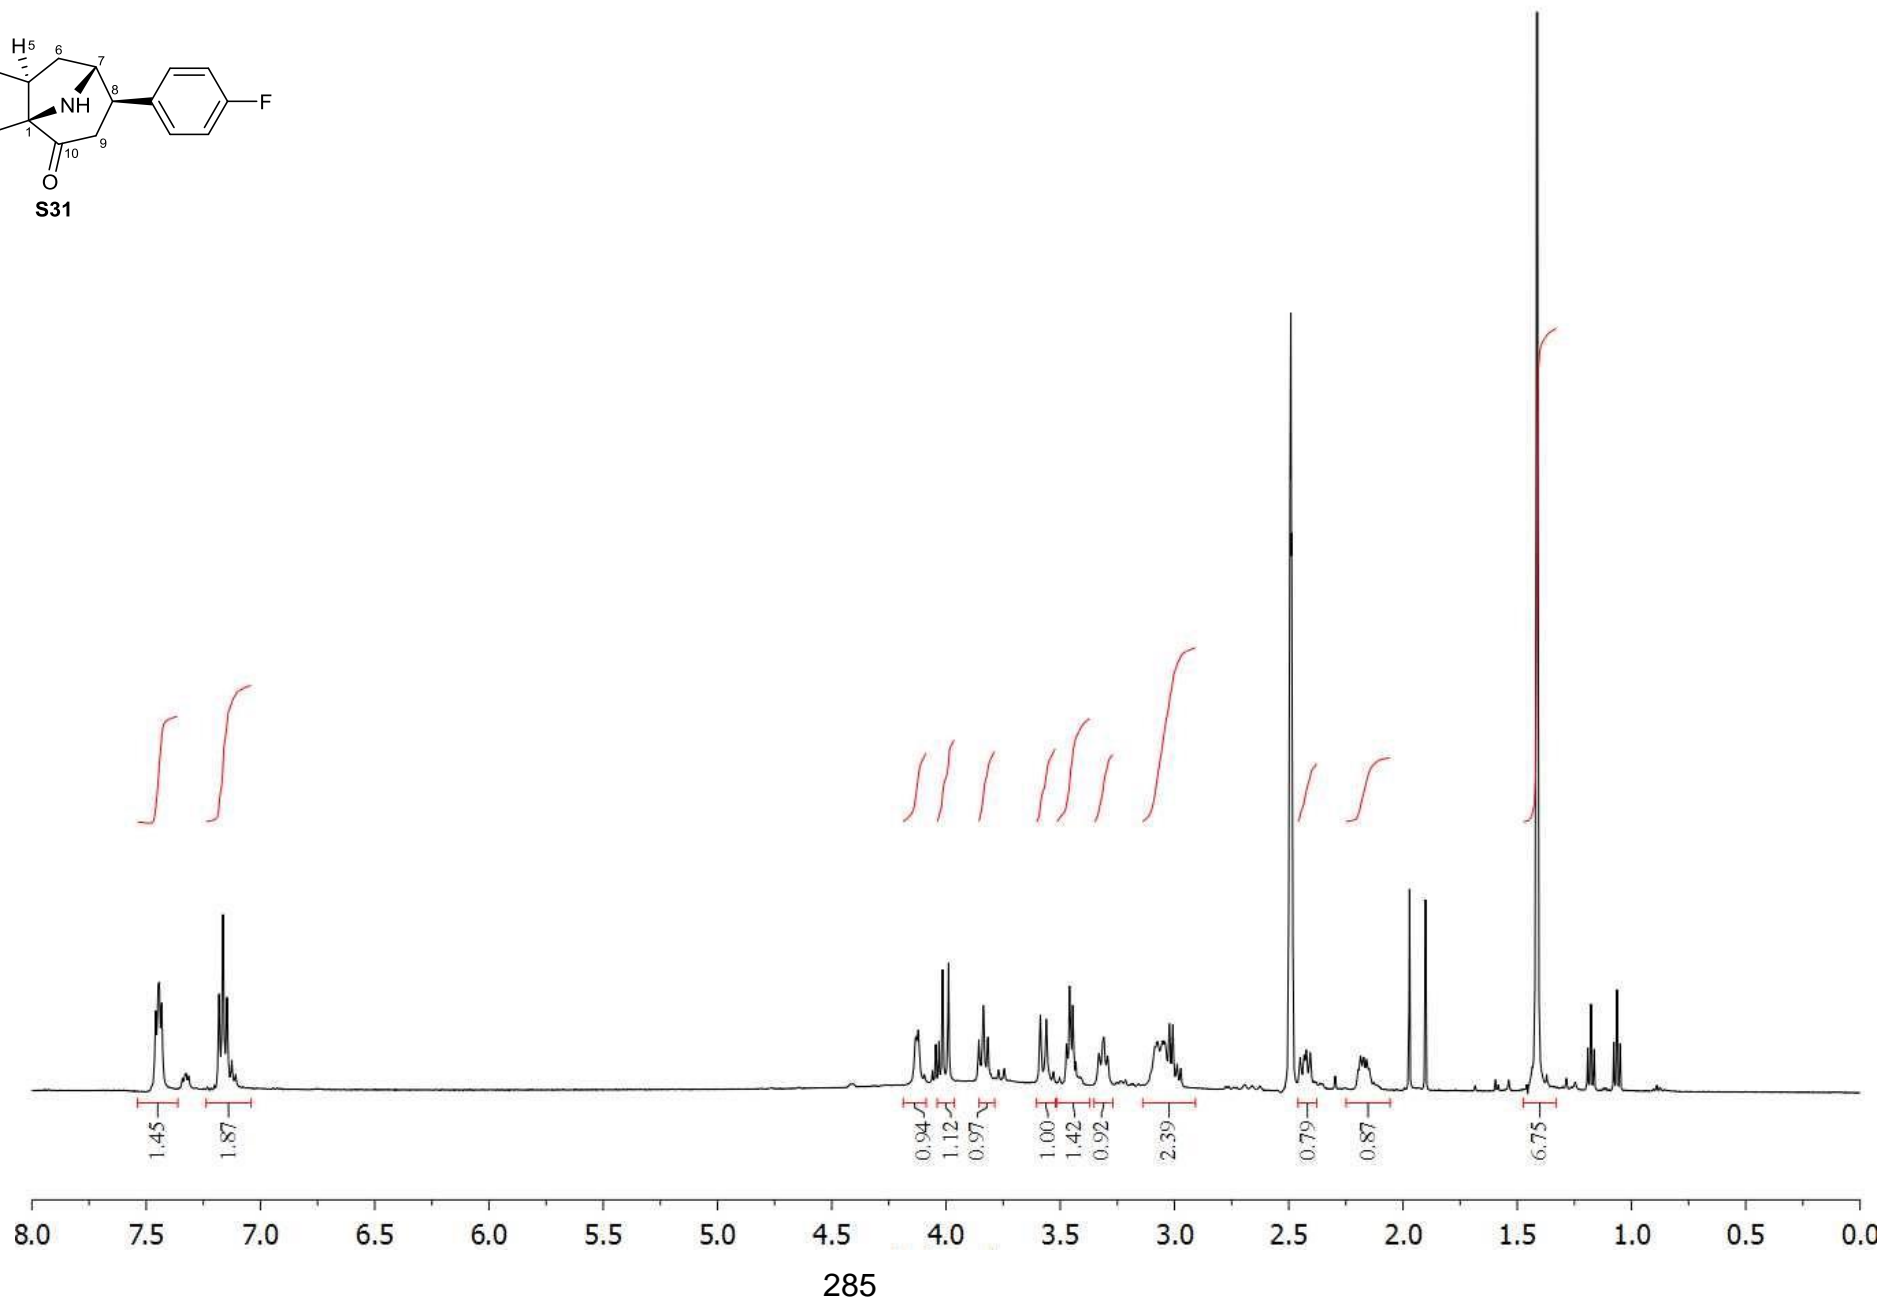

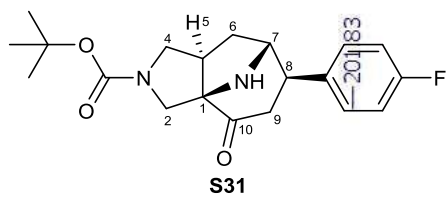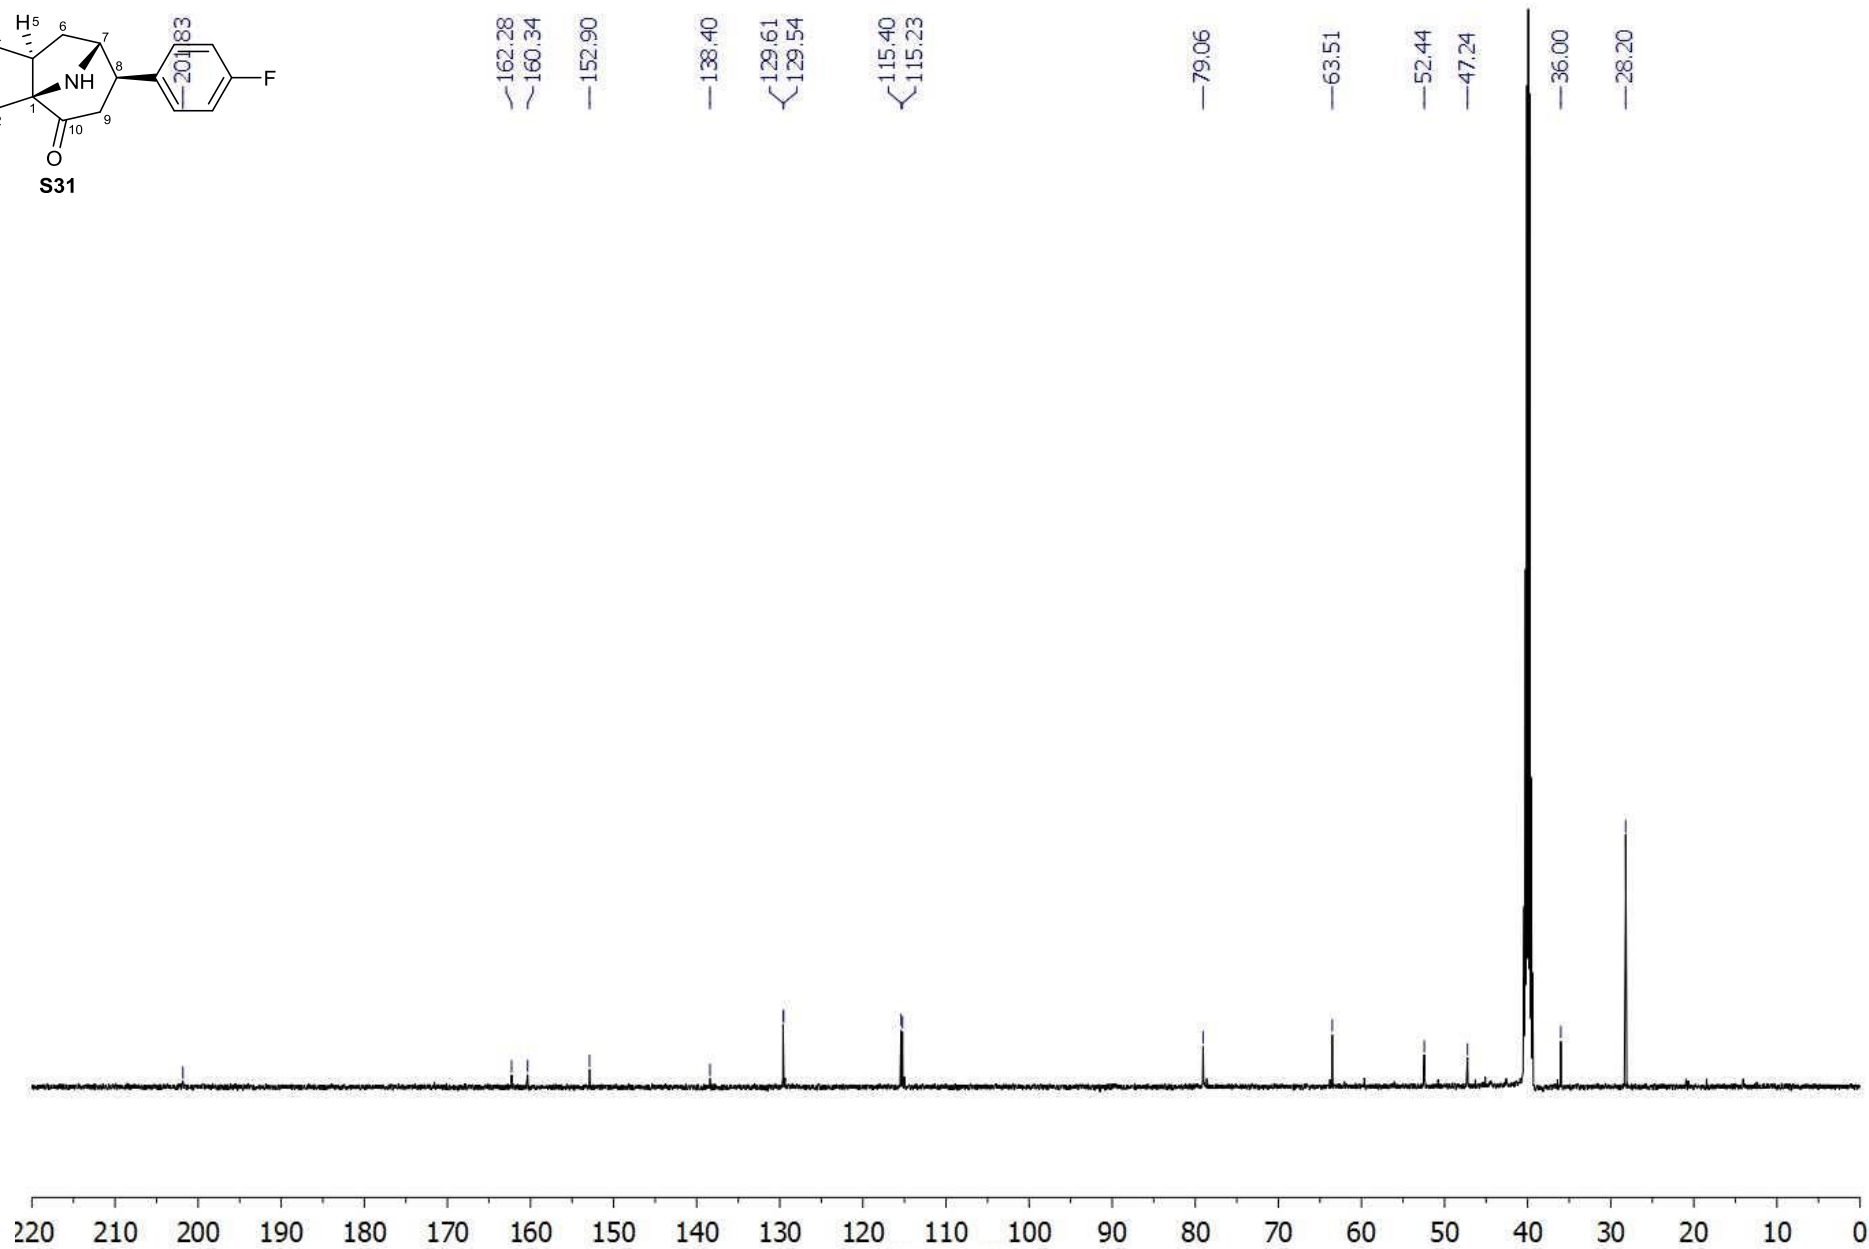

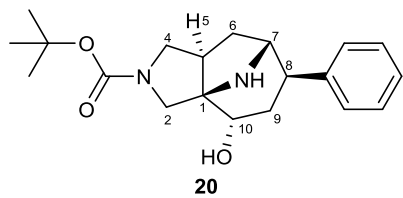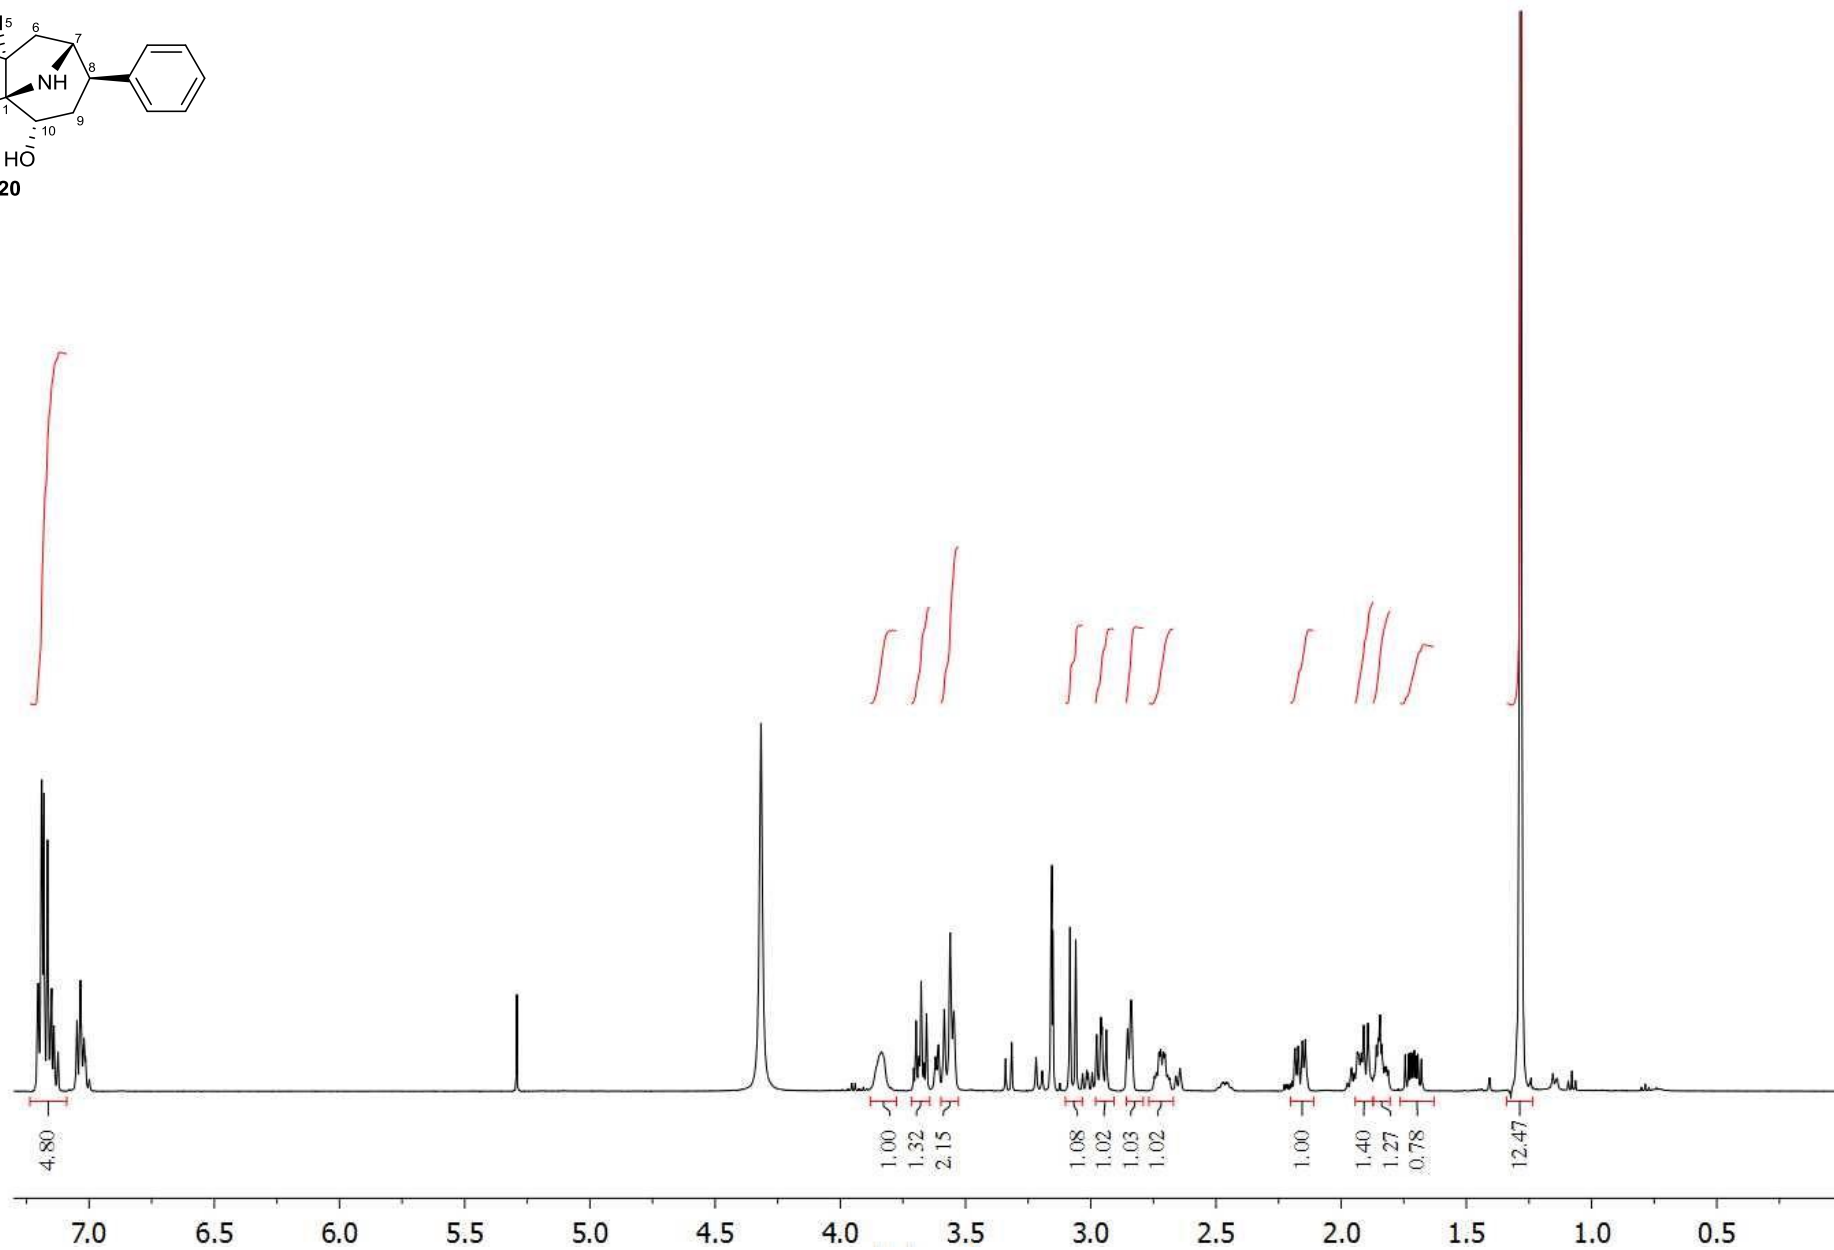

287

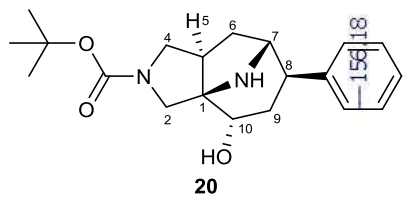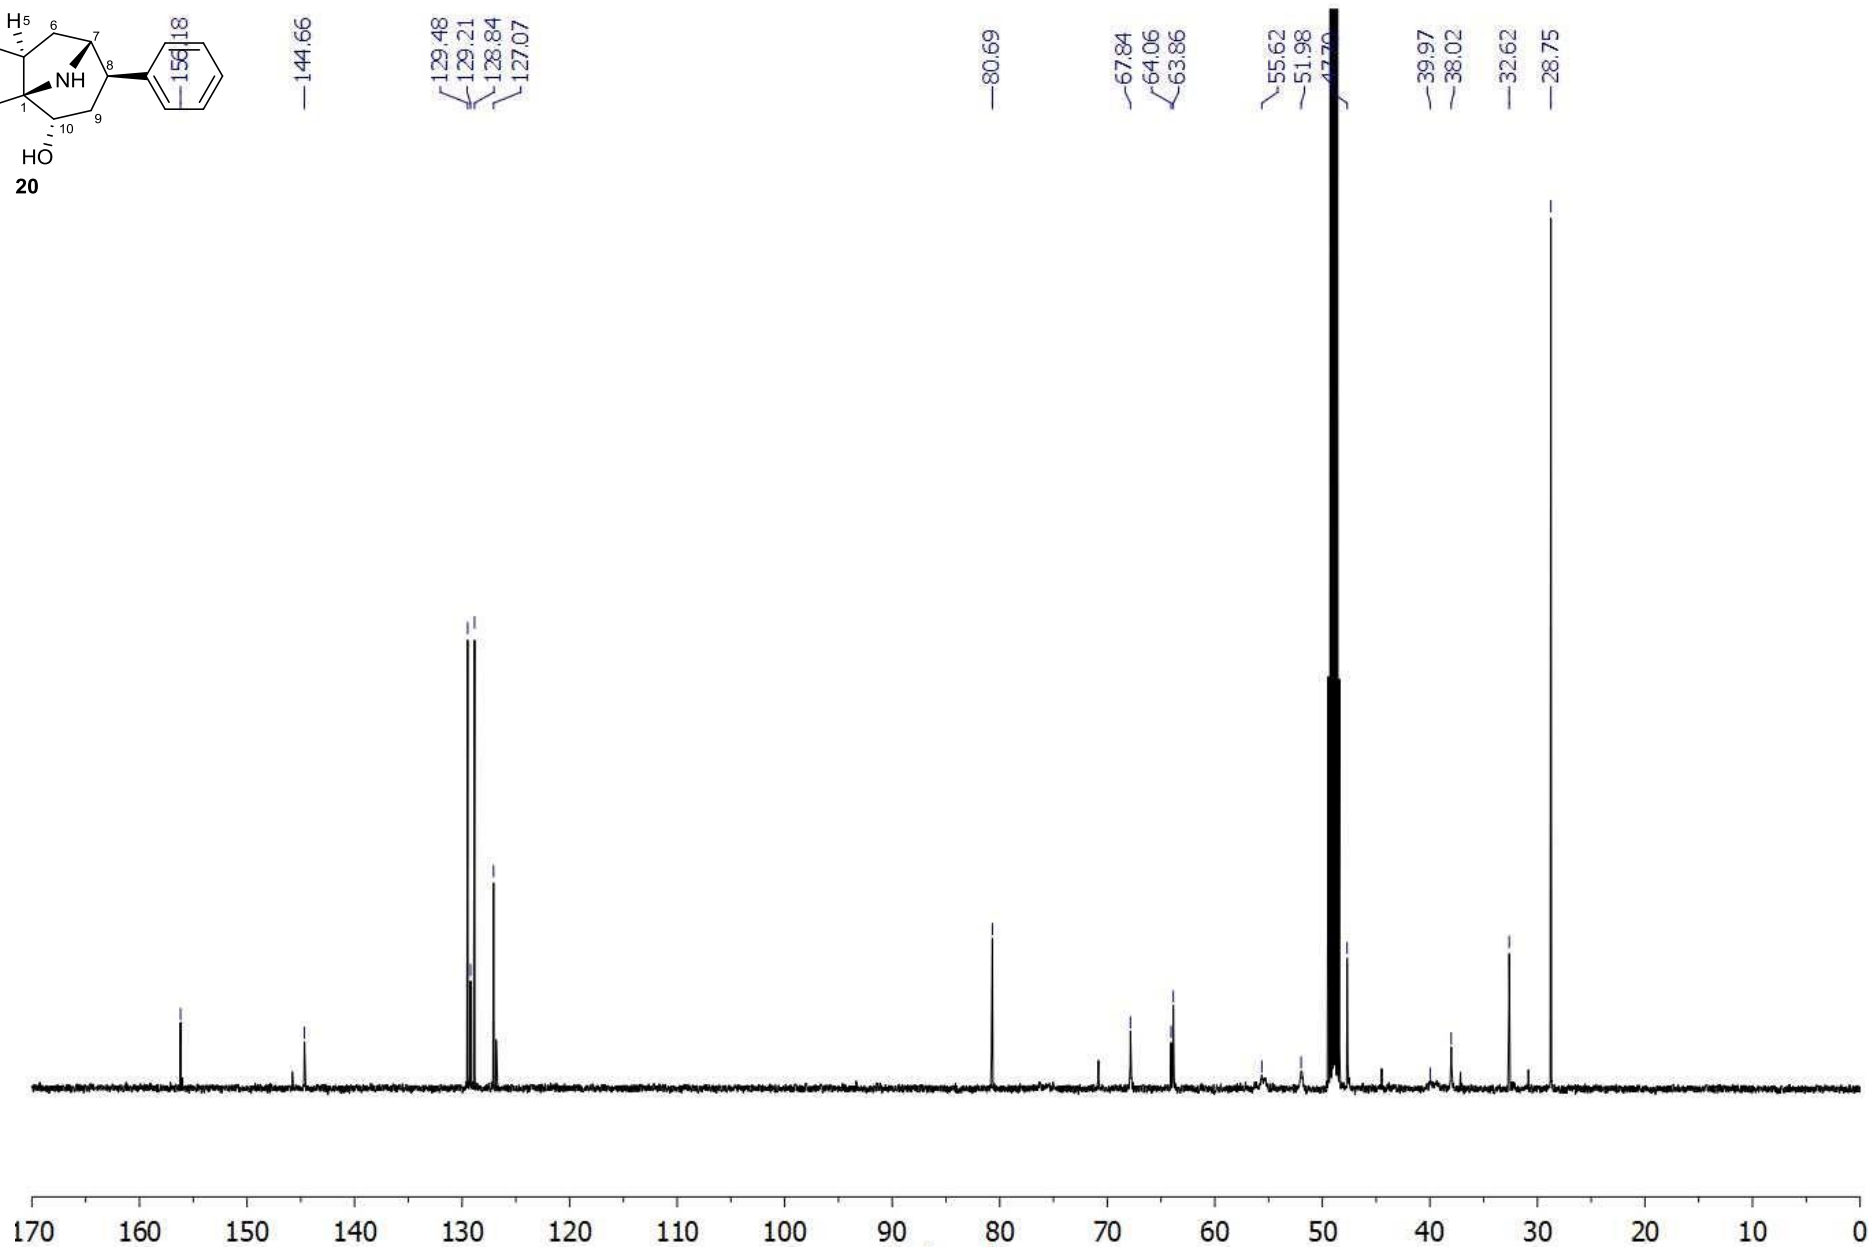



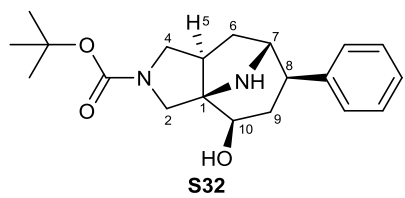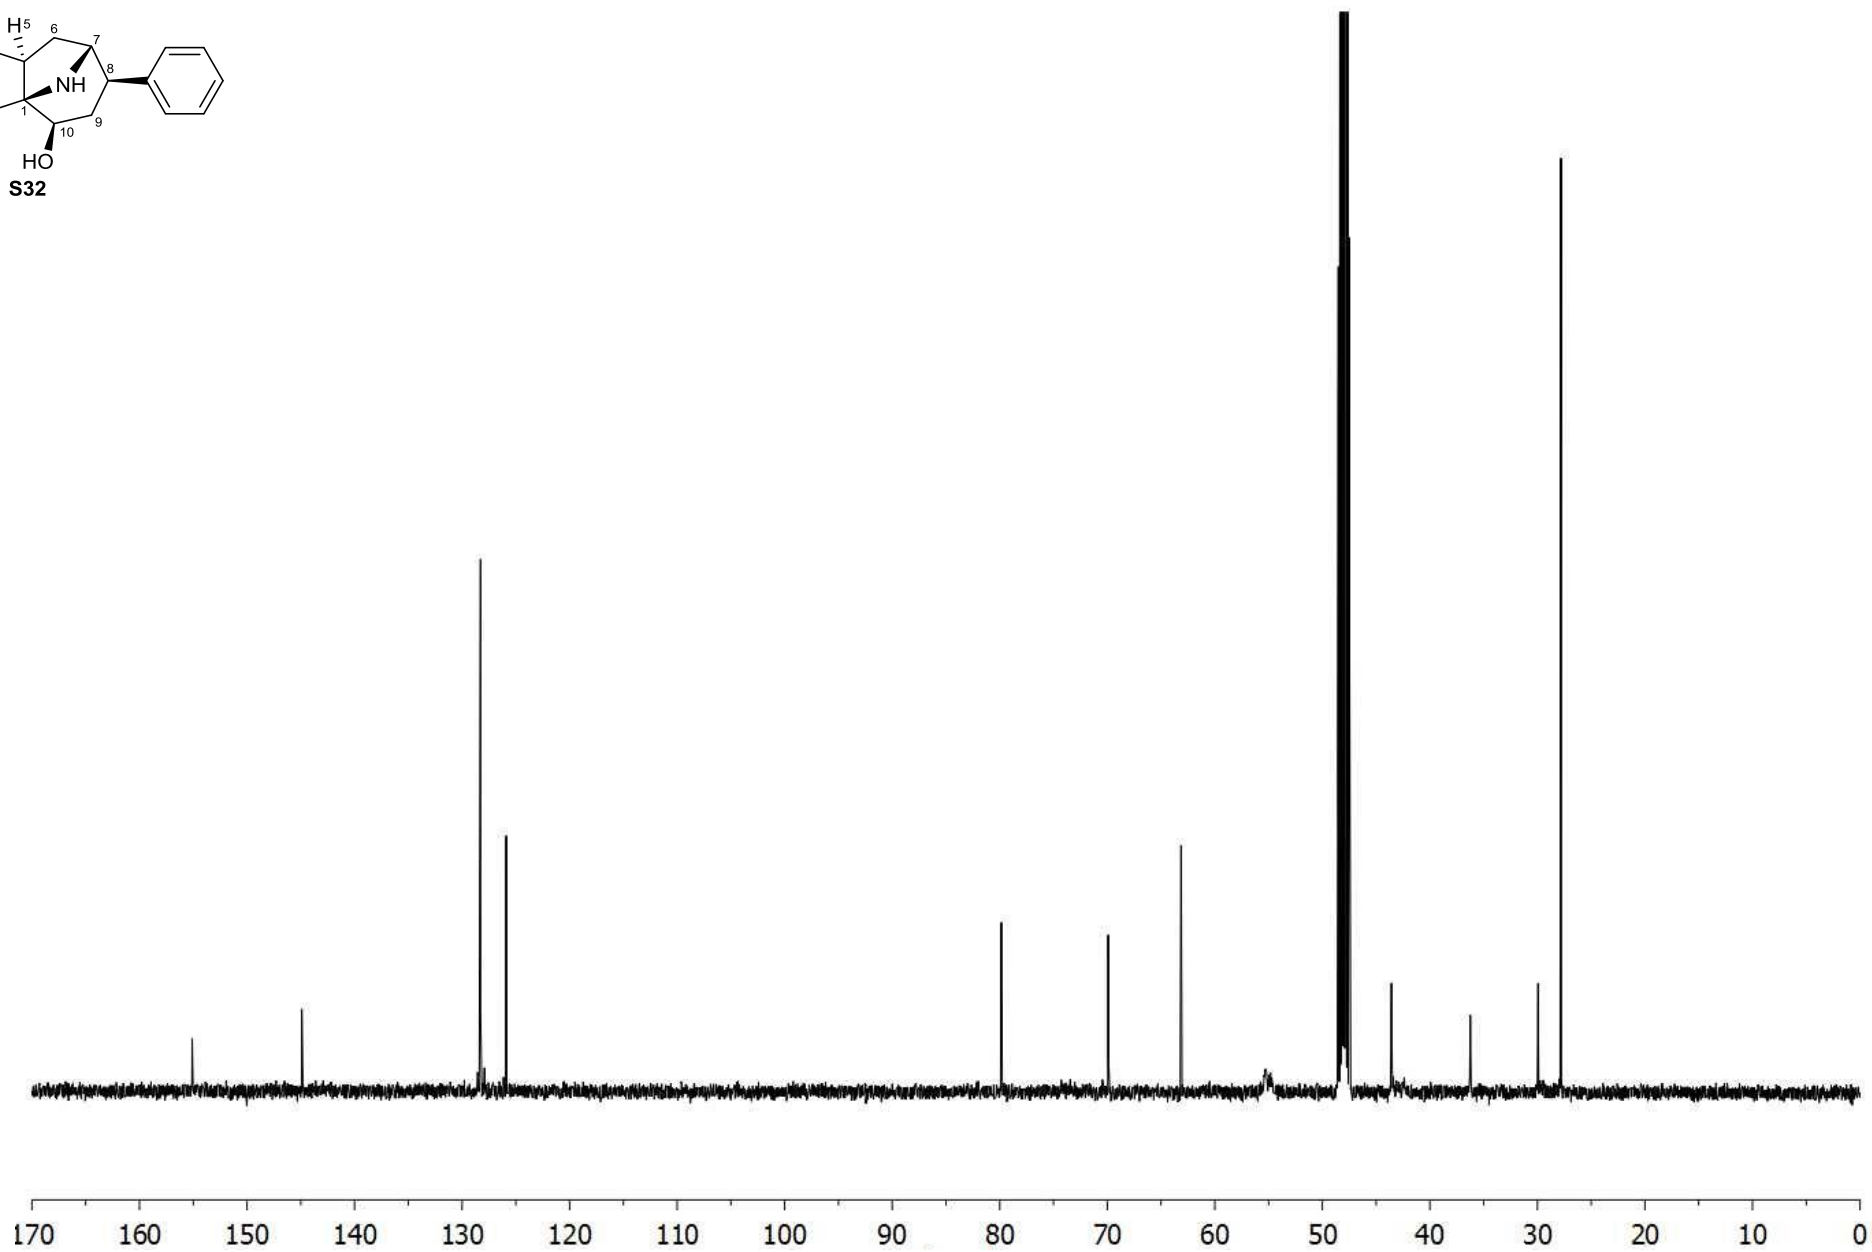

290

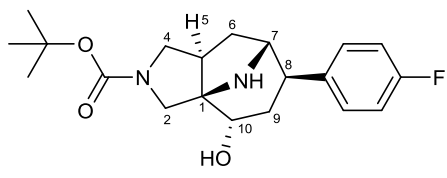

**S33**

+

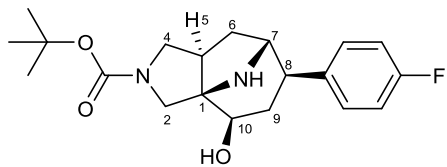

**S34**

**S33:S34 40:60**

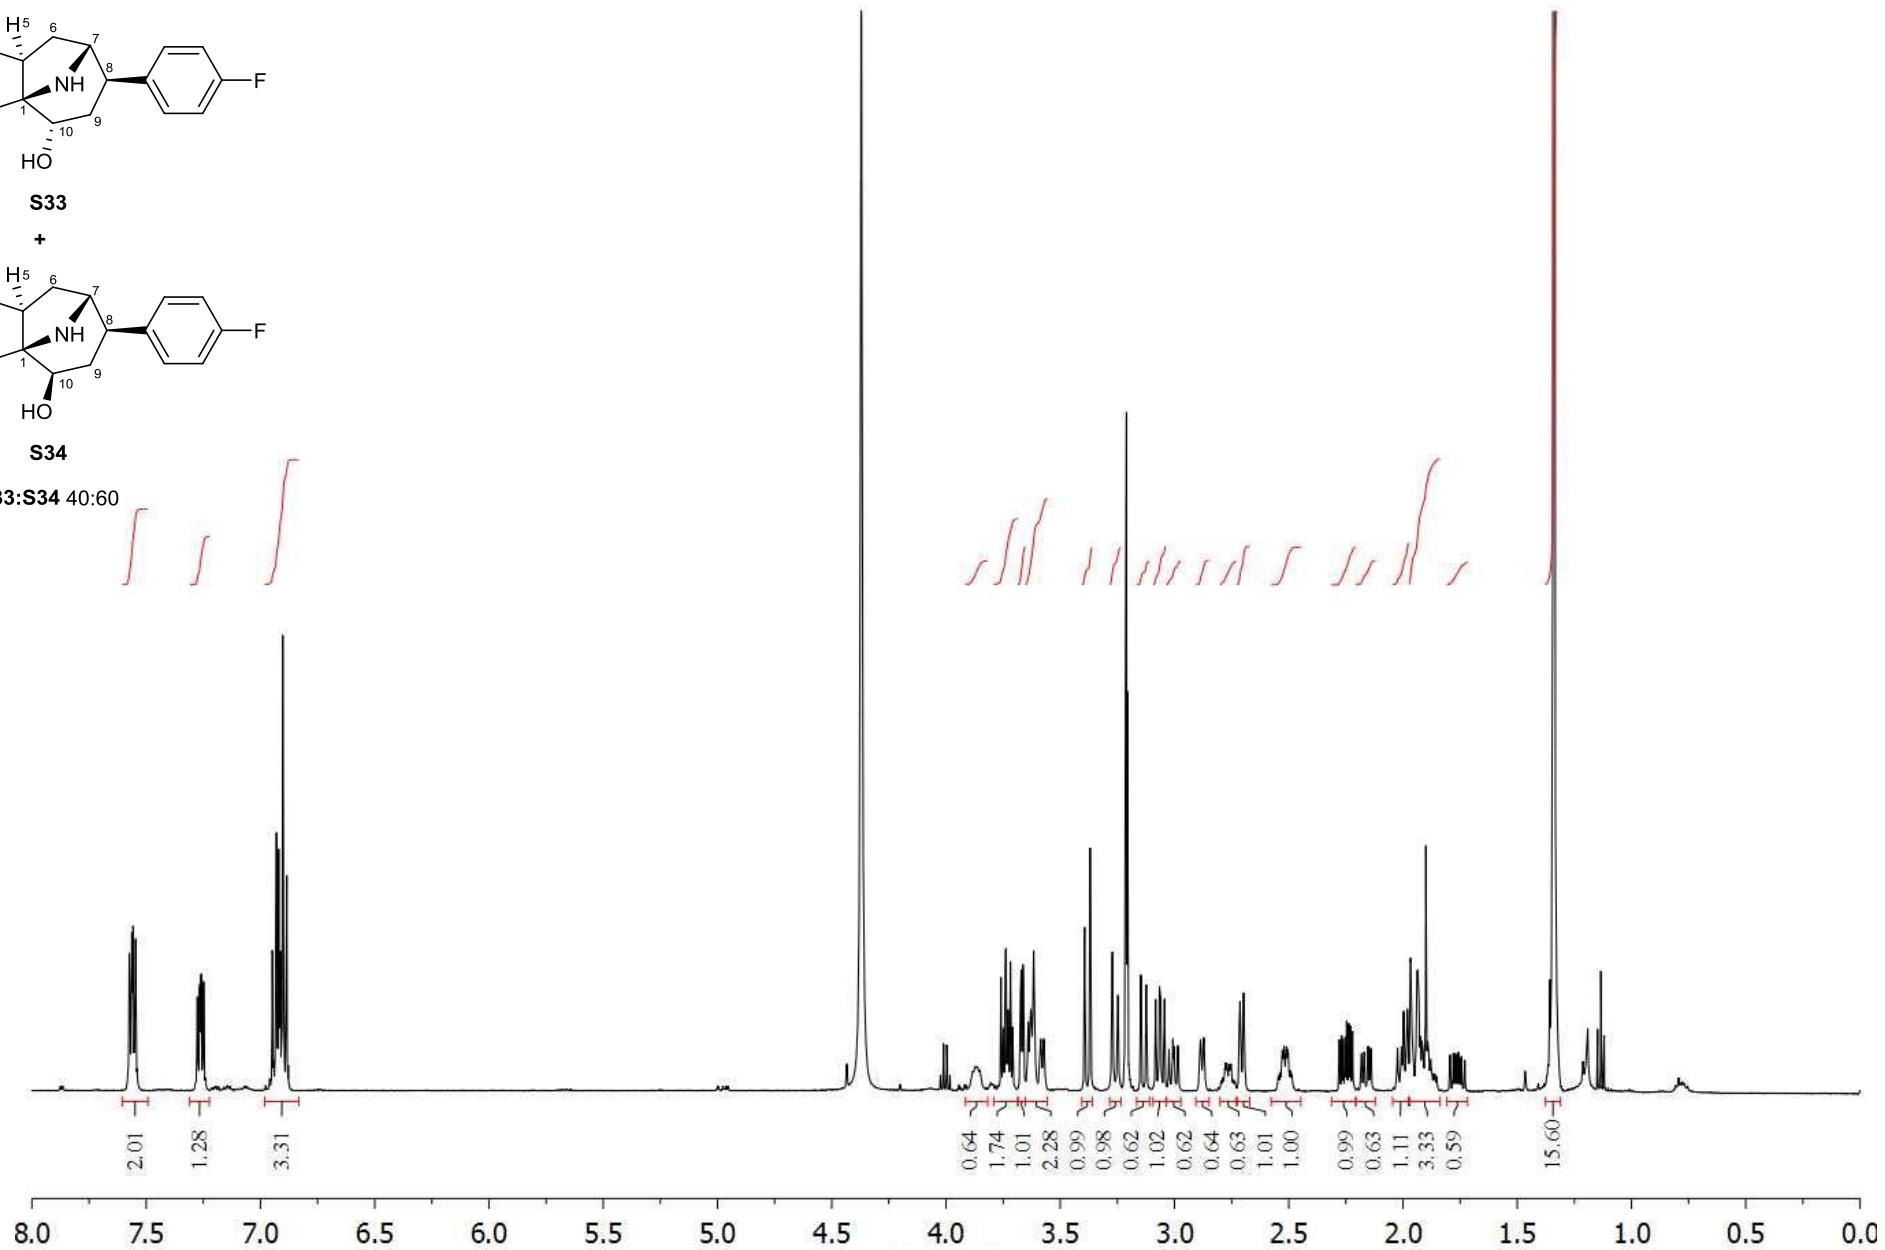



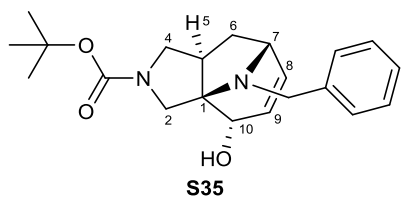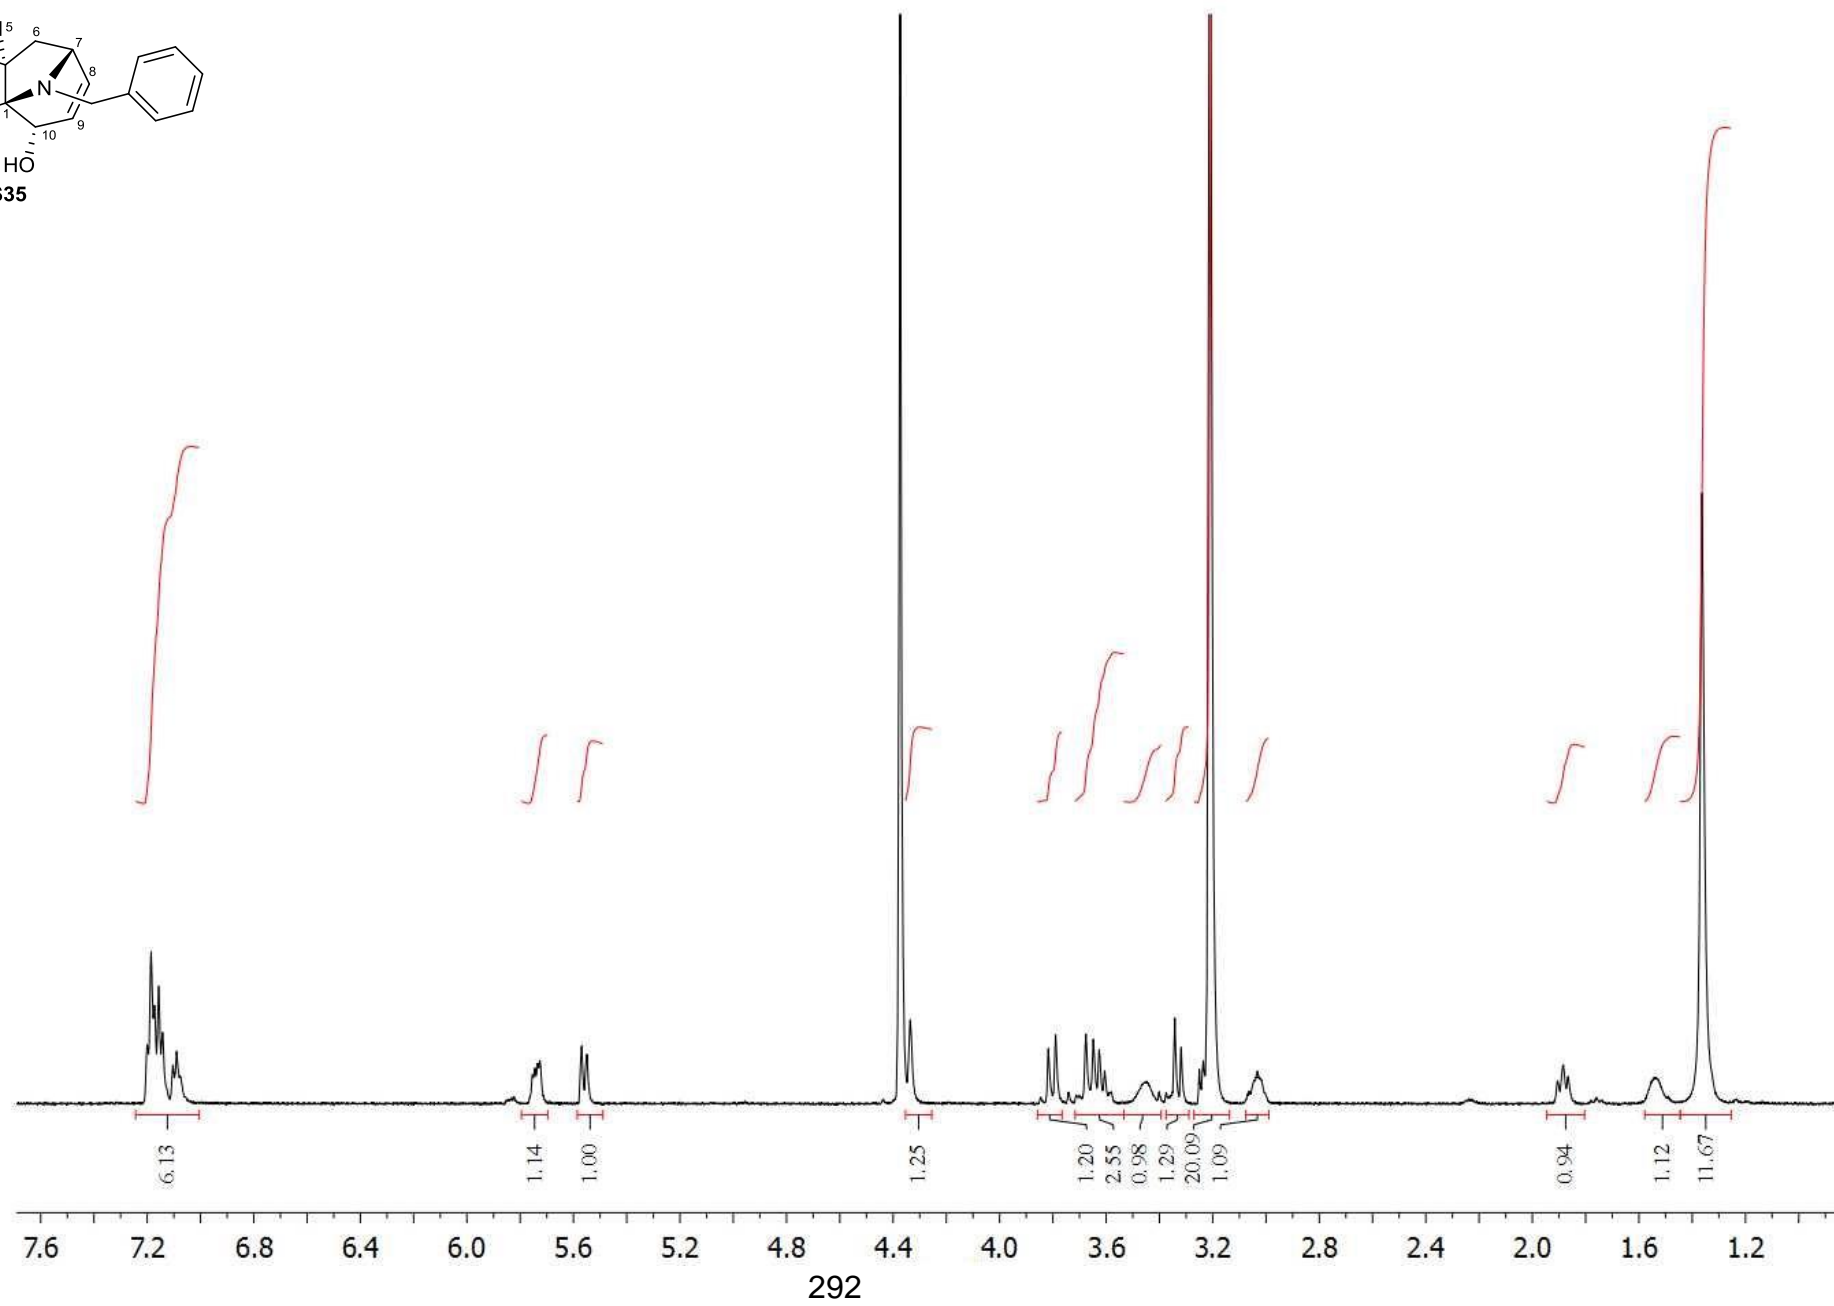

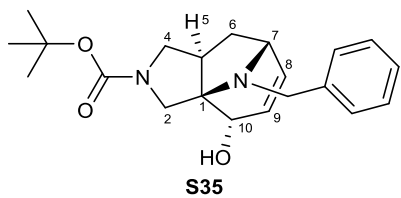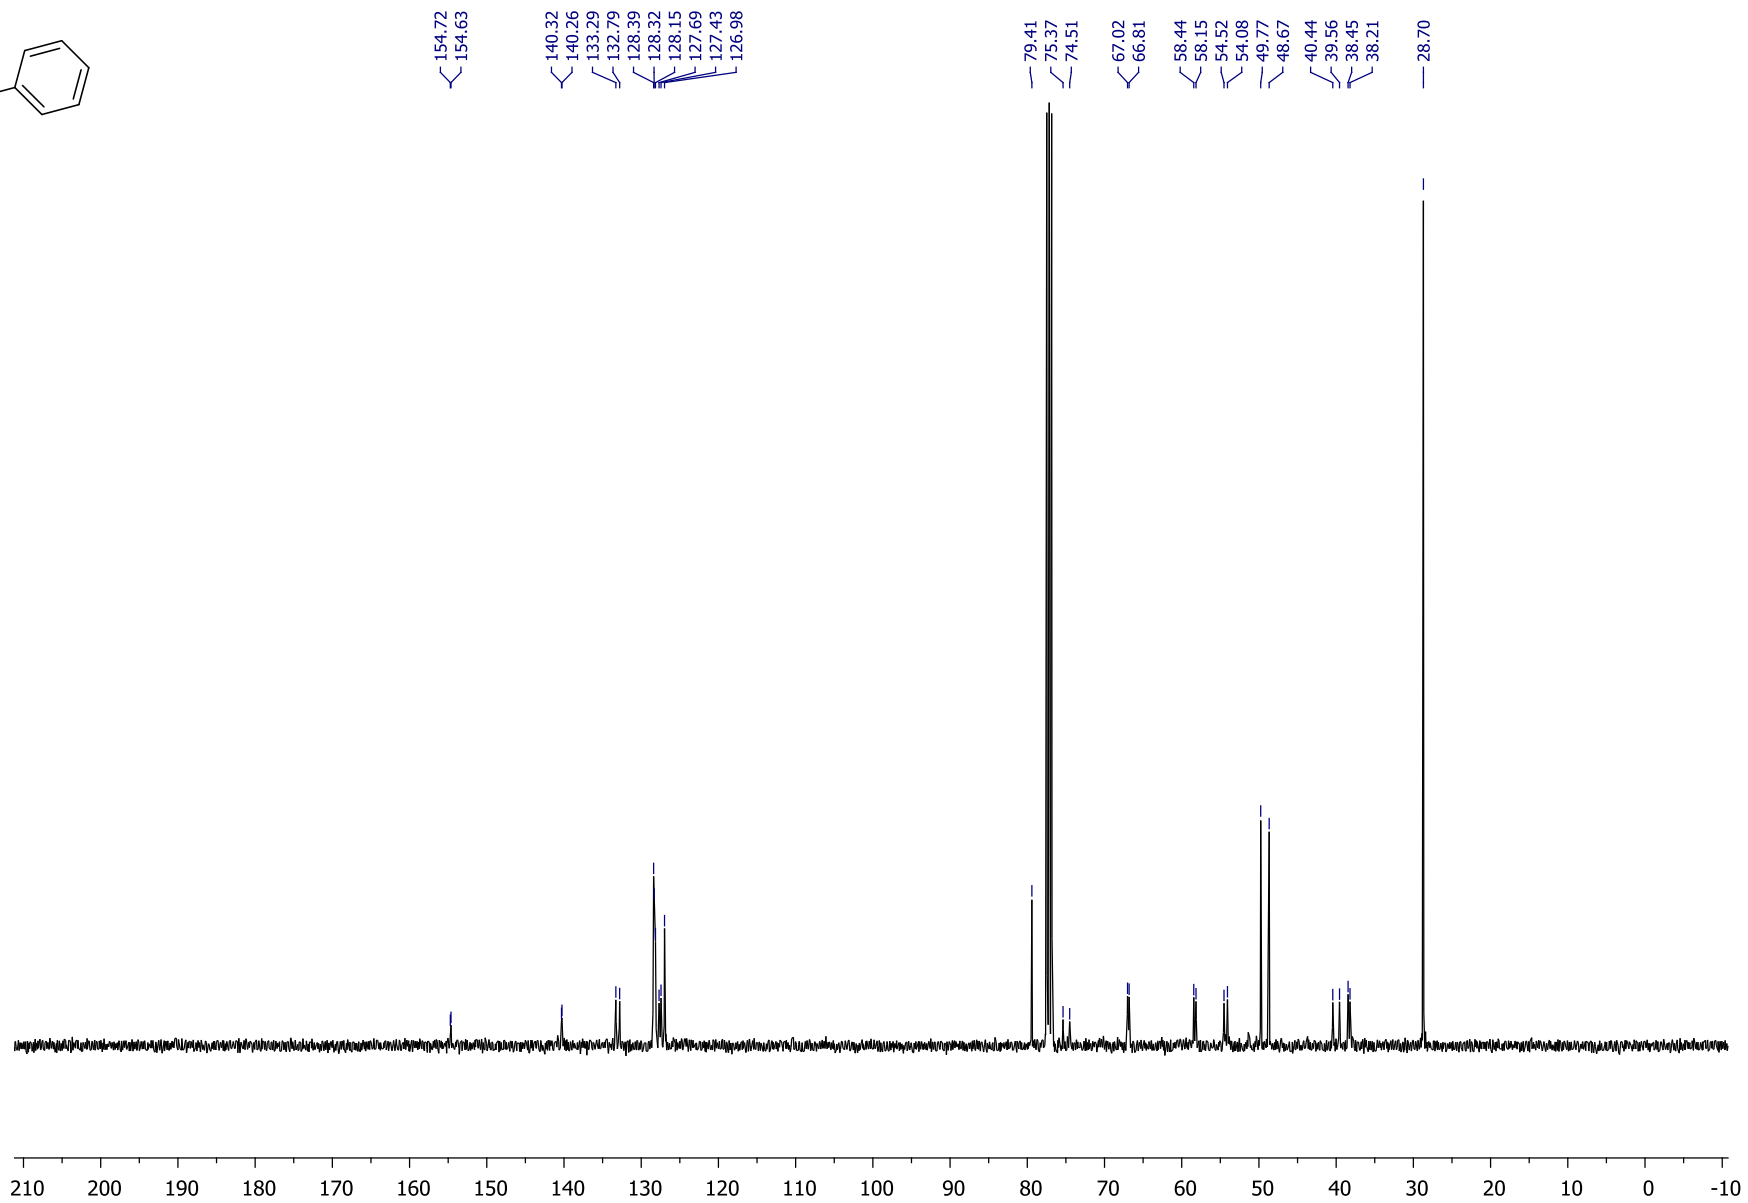

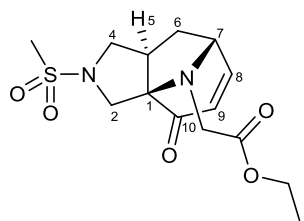

**S36**  
(MeOD-d<sub>4</sub> @ 333 K)

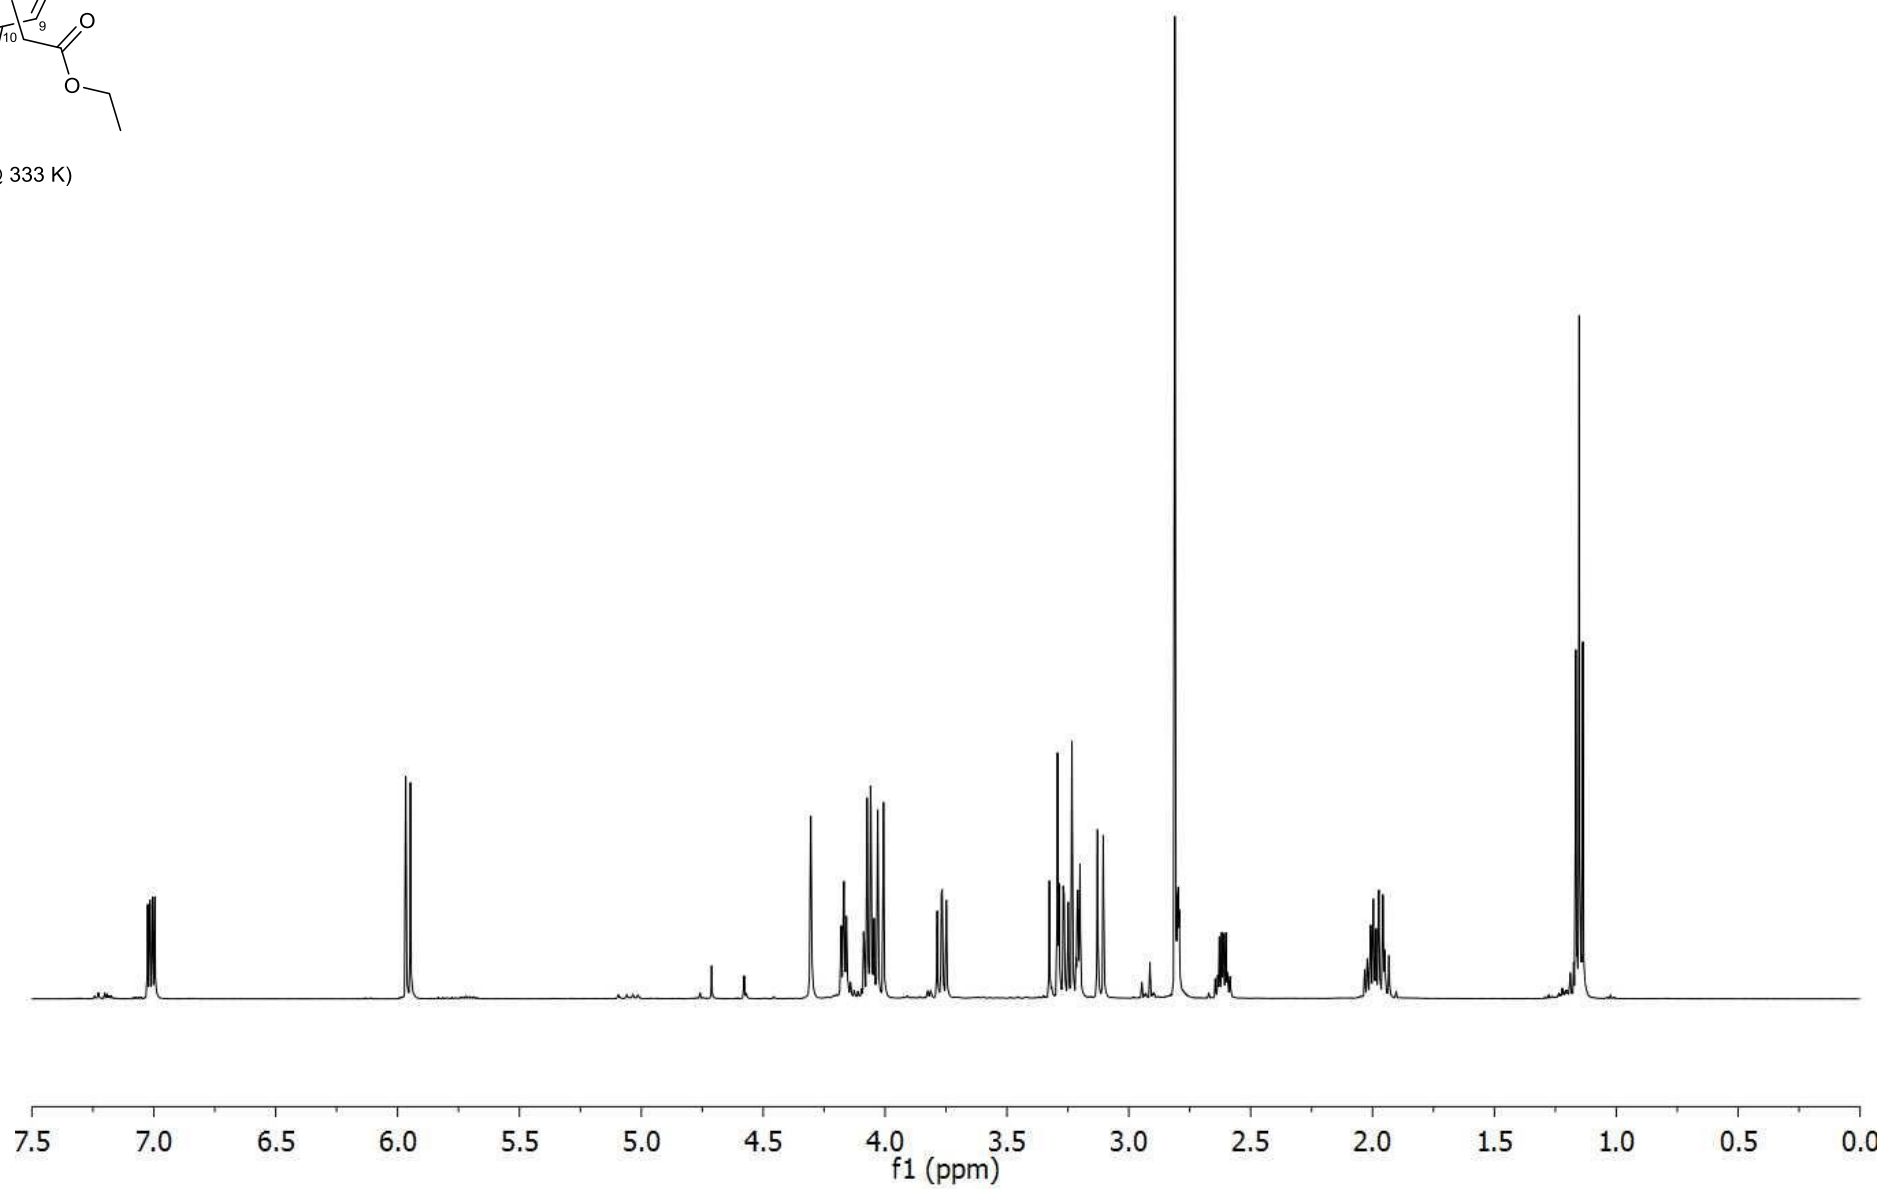

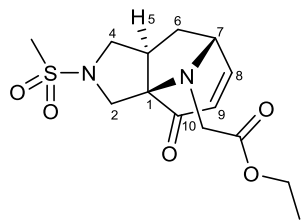

**S36**

(MeOD-d<sub>4</sub> @ 333 K)

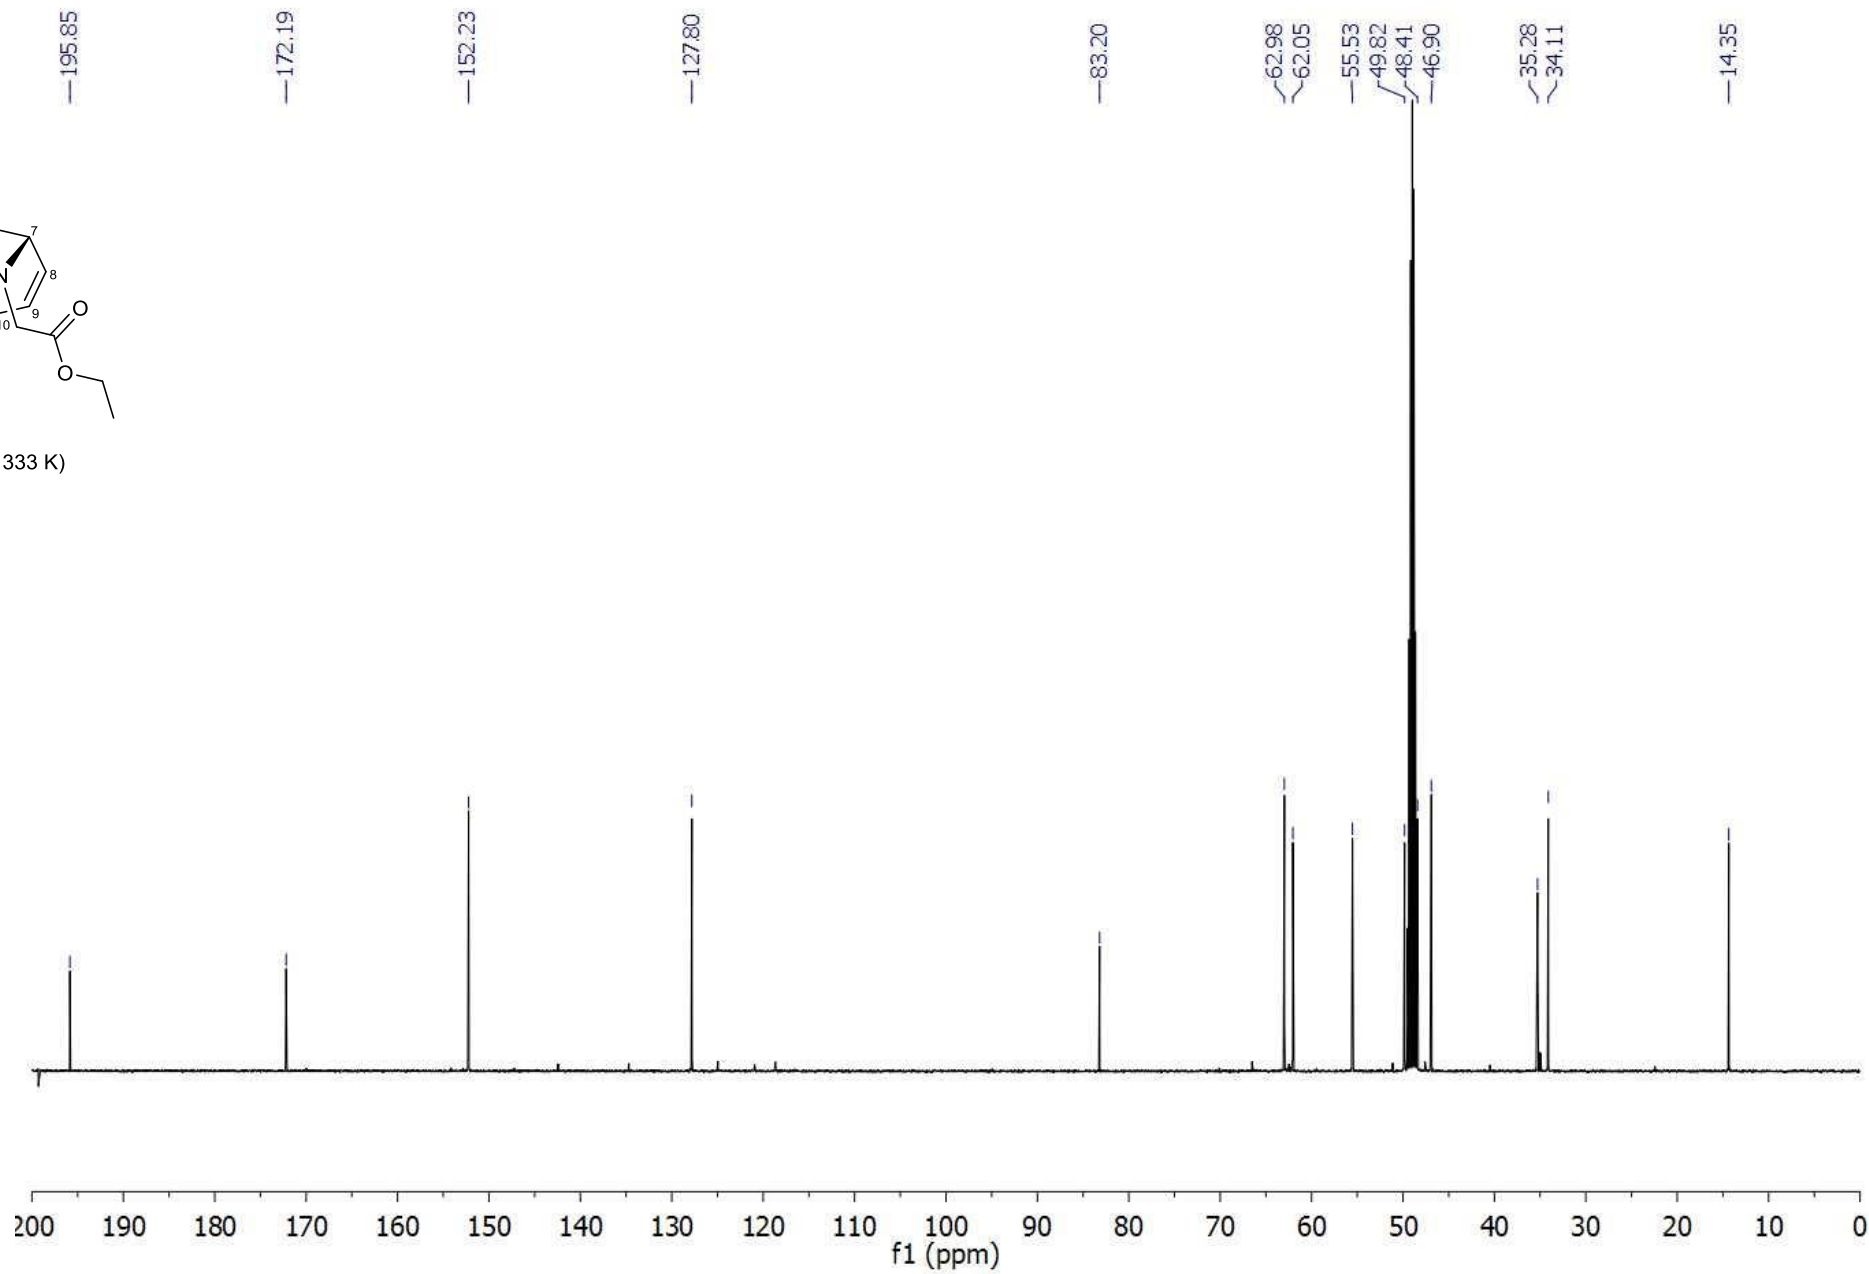

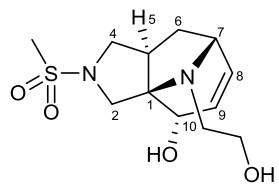

**F1**

+

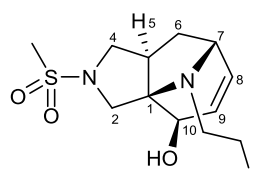

**F2**

(MeOD-d<sub>4</sub> @ 333 K)

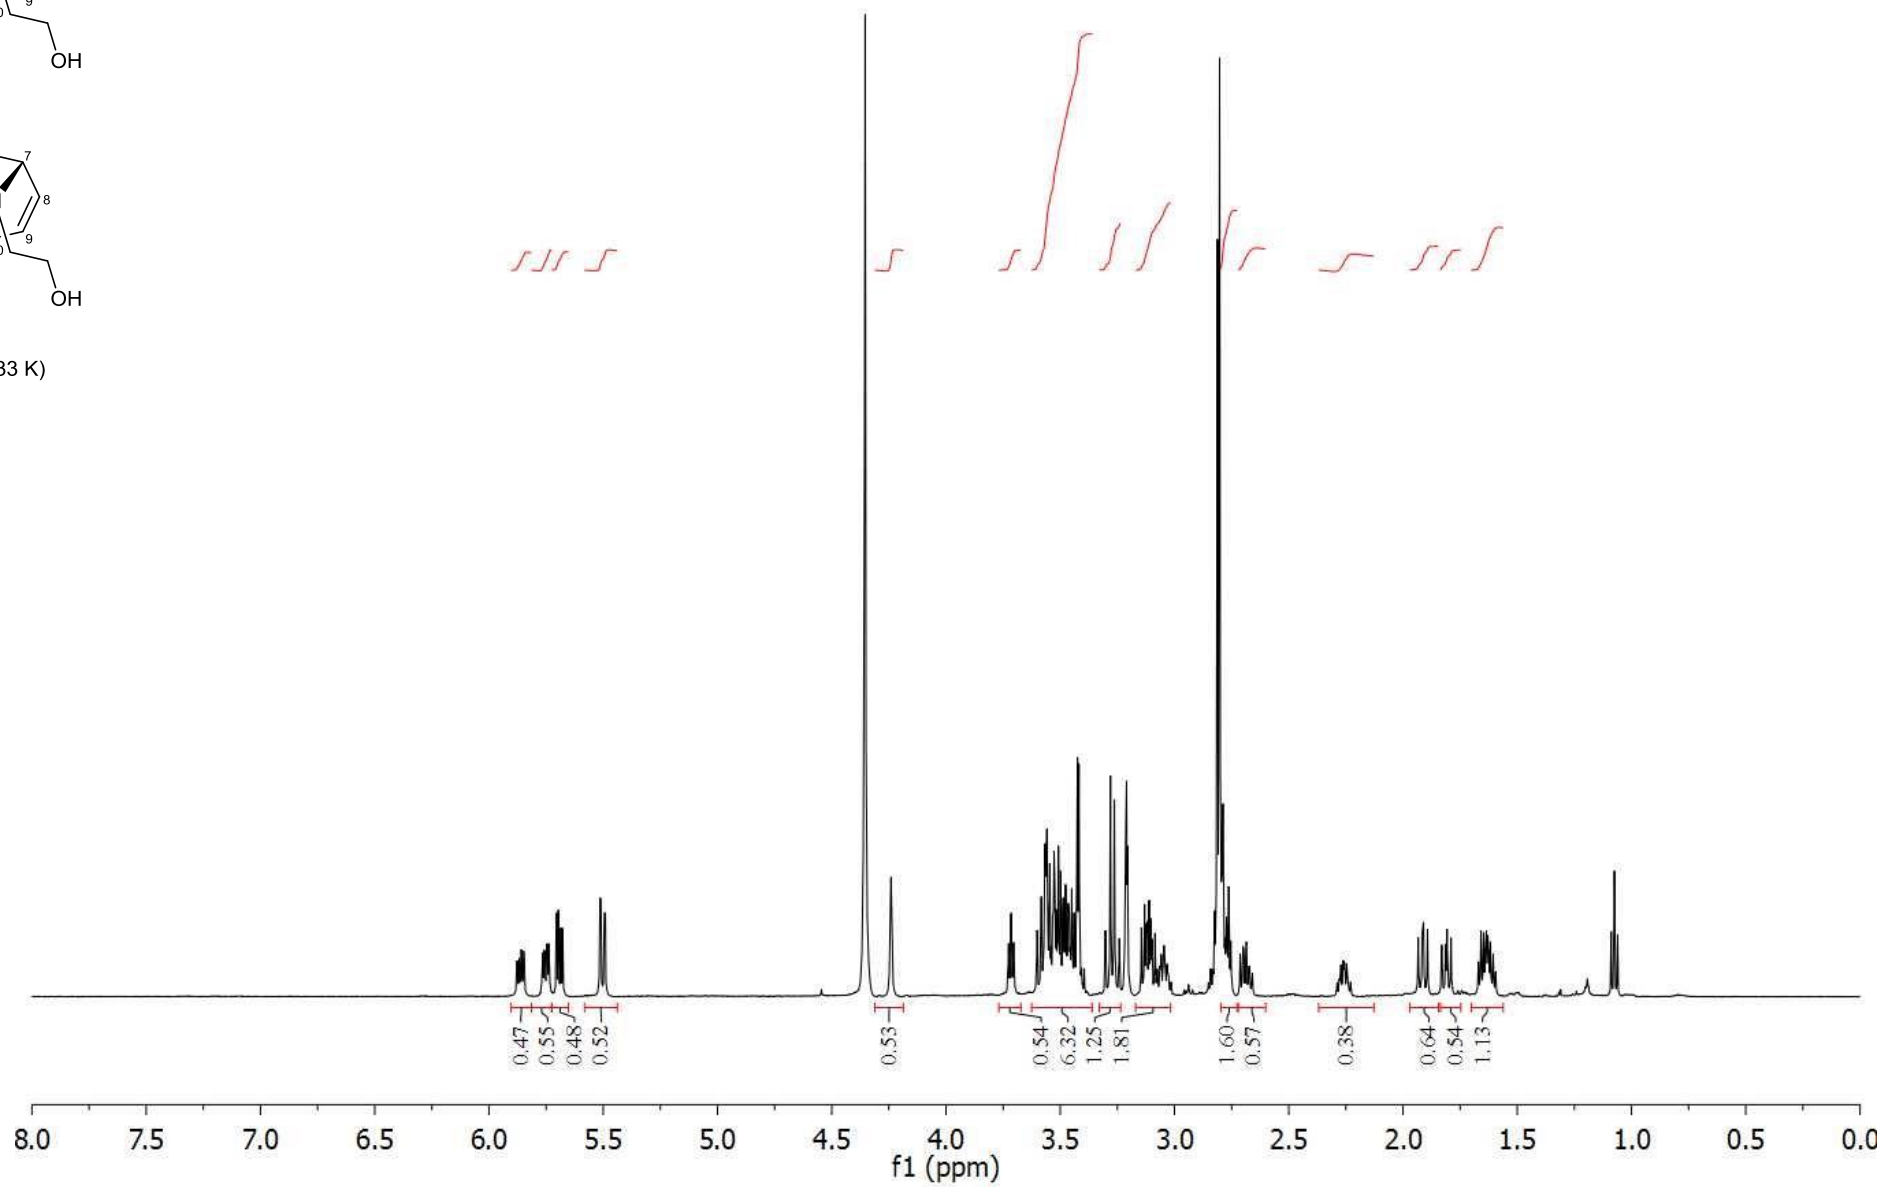

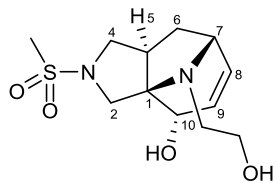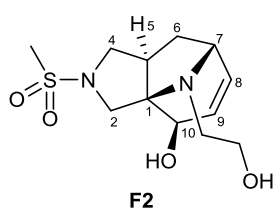

(MeOD-d<sub>4</sub> @ 333 K)

133.46  
132.82  
129.45  
127.61

77.05  
76.31  
70.17  
66.77  
62.08  
61.96  
60.66  
60.62  
56.30  
55.96  
47.90  
46.62  
41.93  
38.80  
38.20  
34.95  
34.82

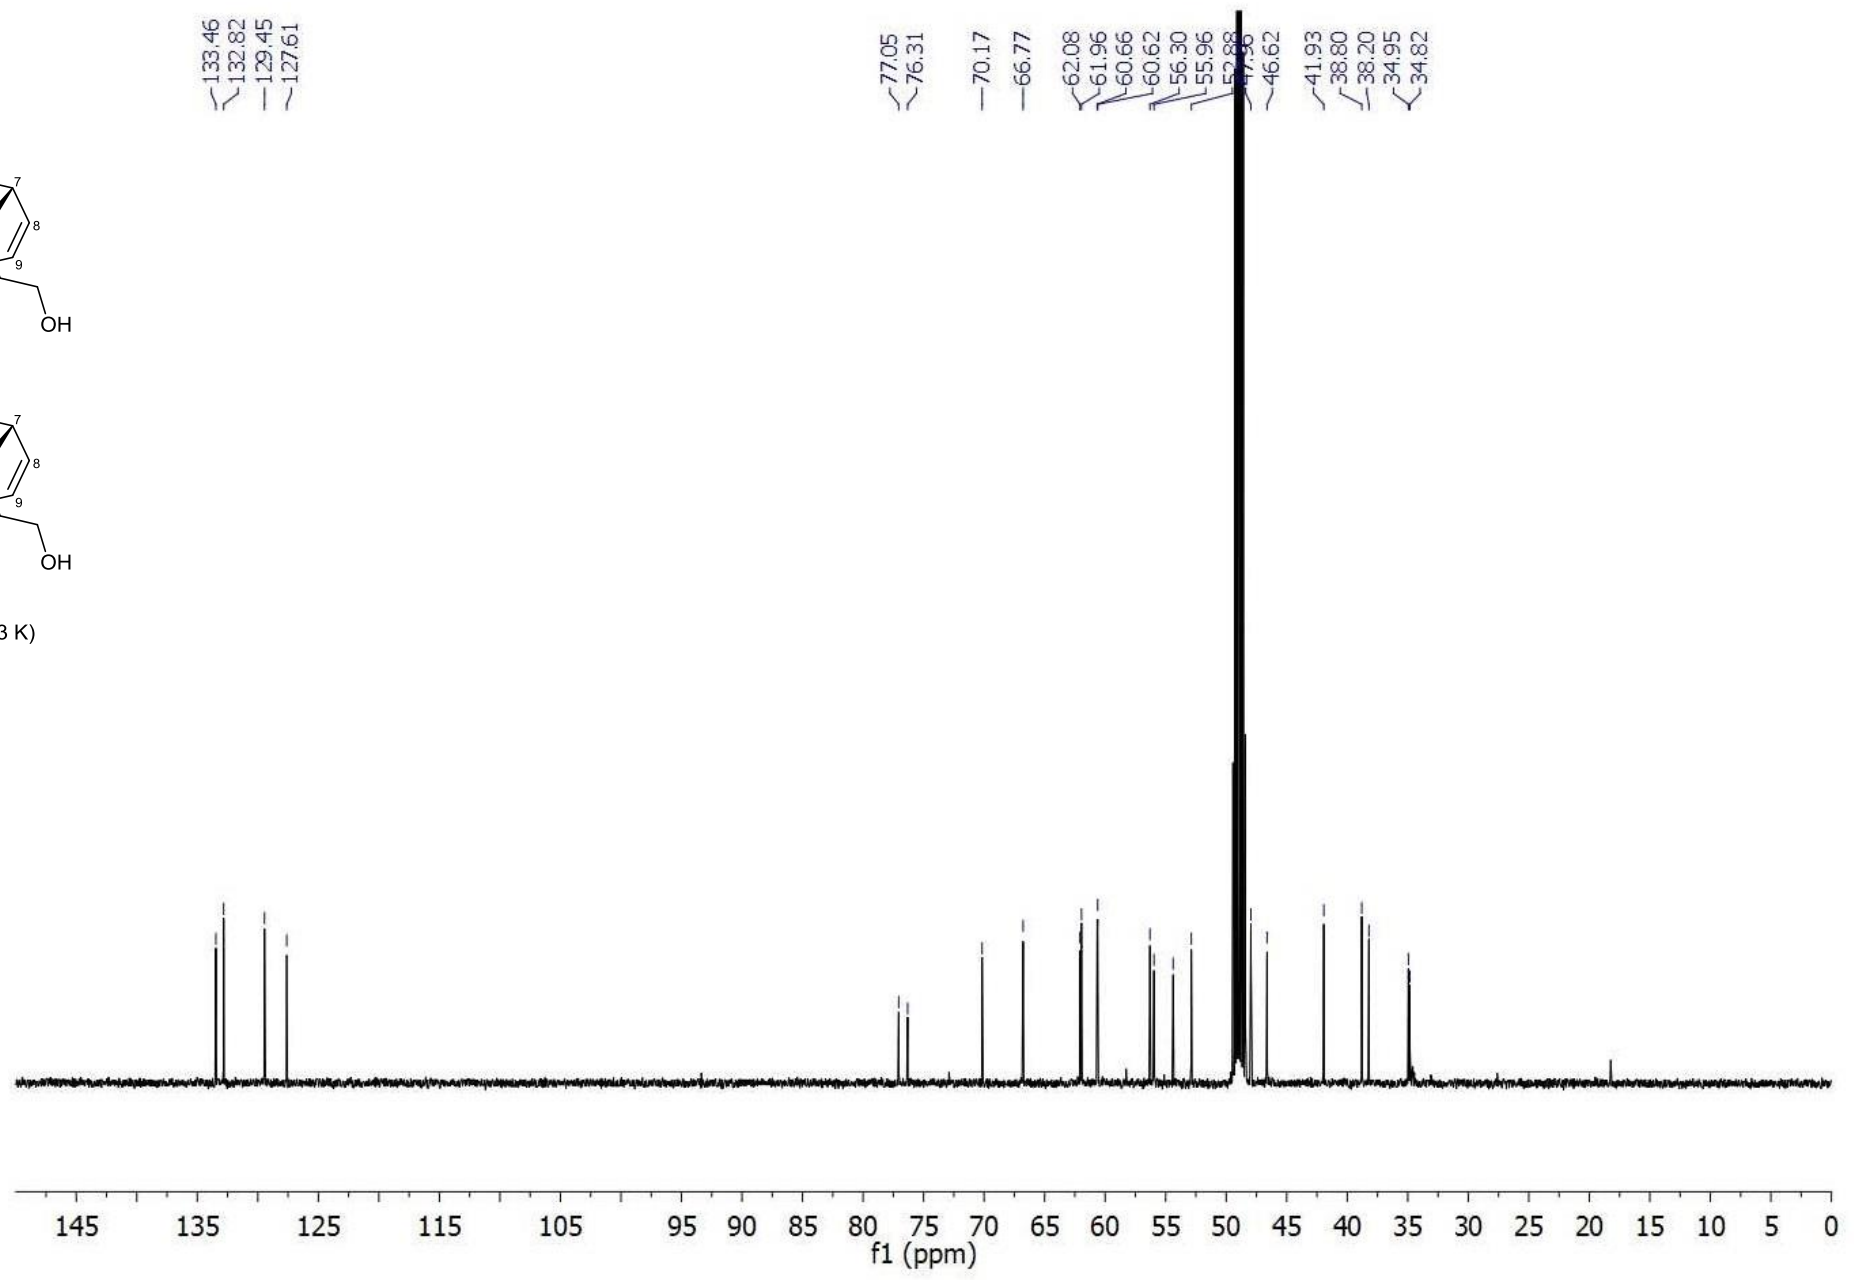

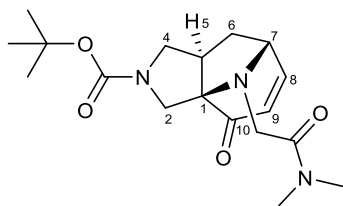

**S37**  
(MeOD-d<sub>4</sub> @ 333 K)

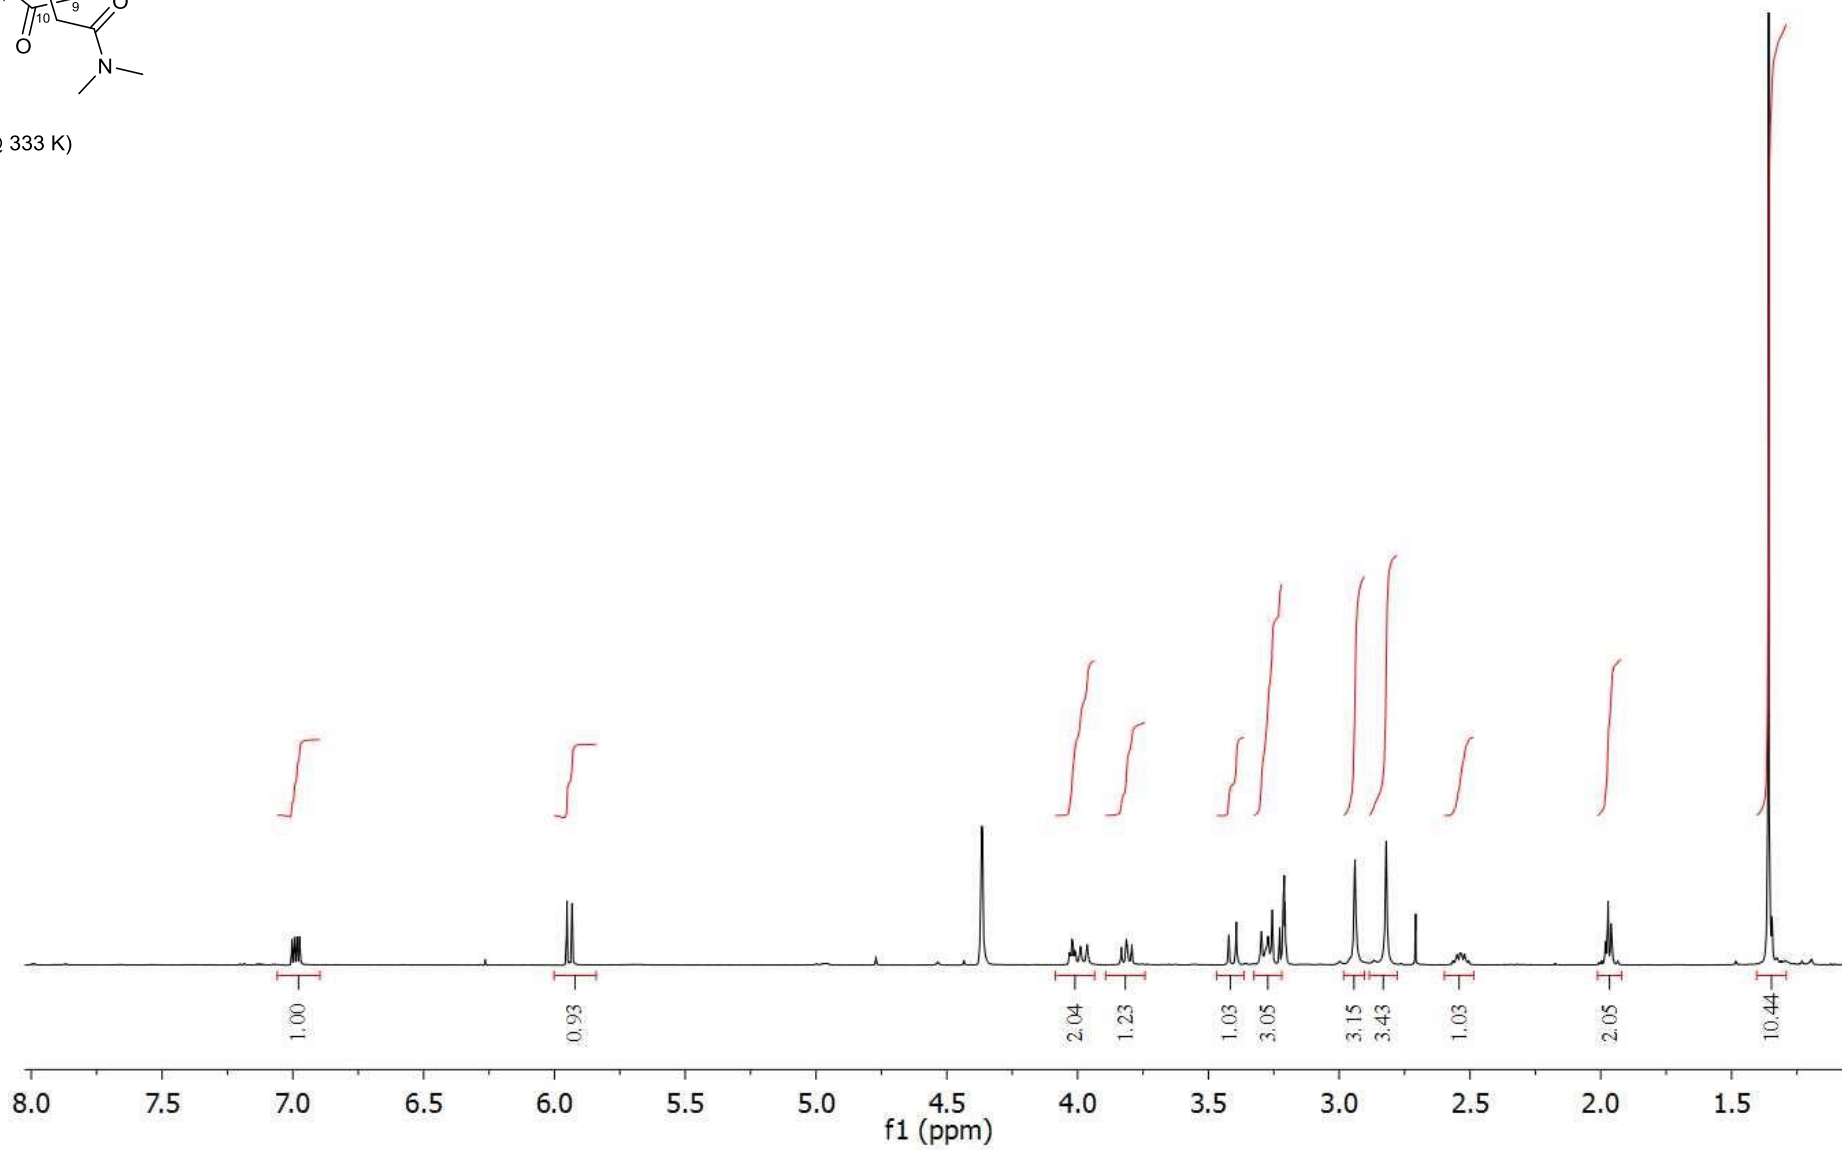

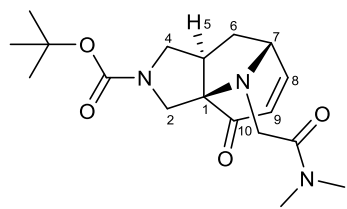

S37

(MeOD-d<sub>4</sub> @ 333 K)

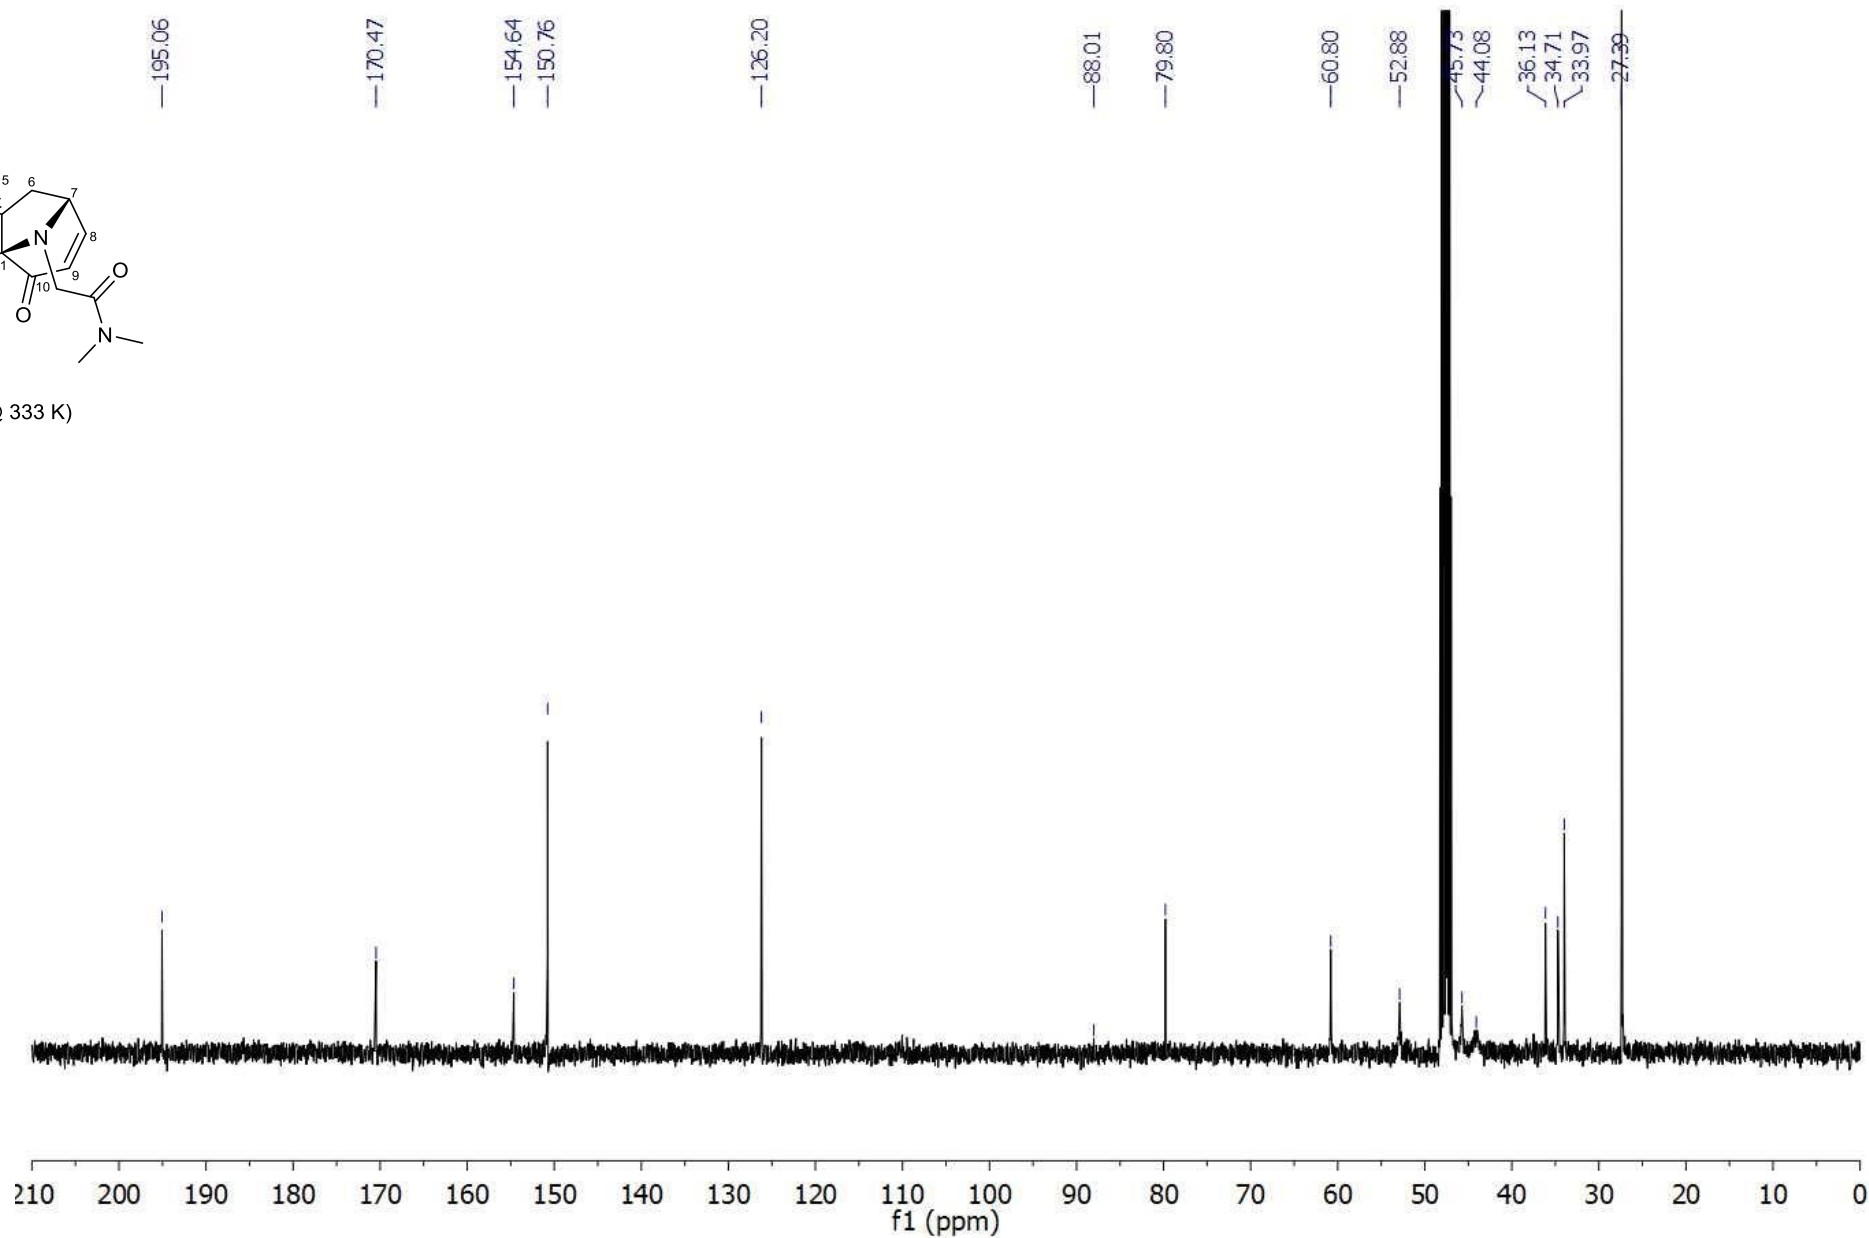



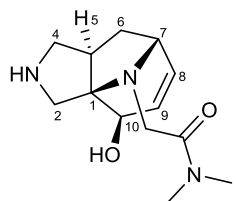

**F3**  
(MeOD-d<sub>4</sub> @ 333 K)

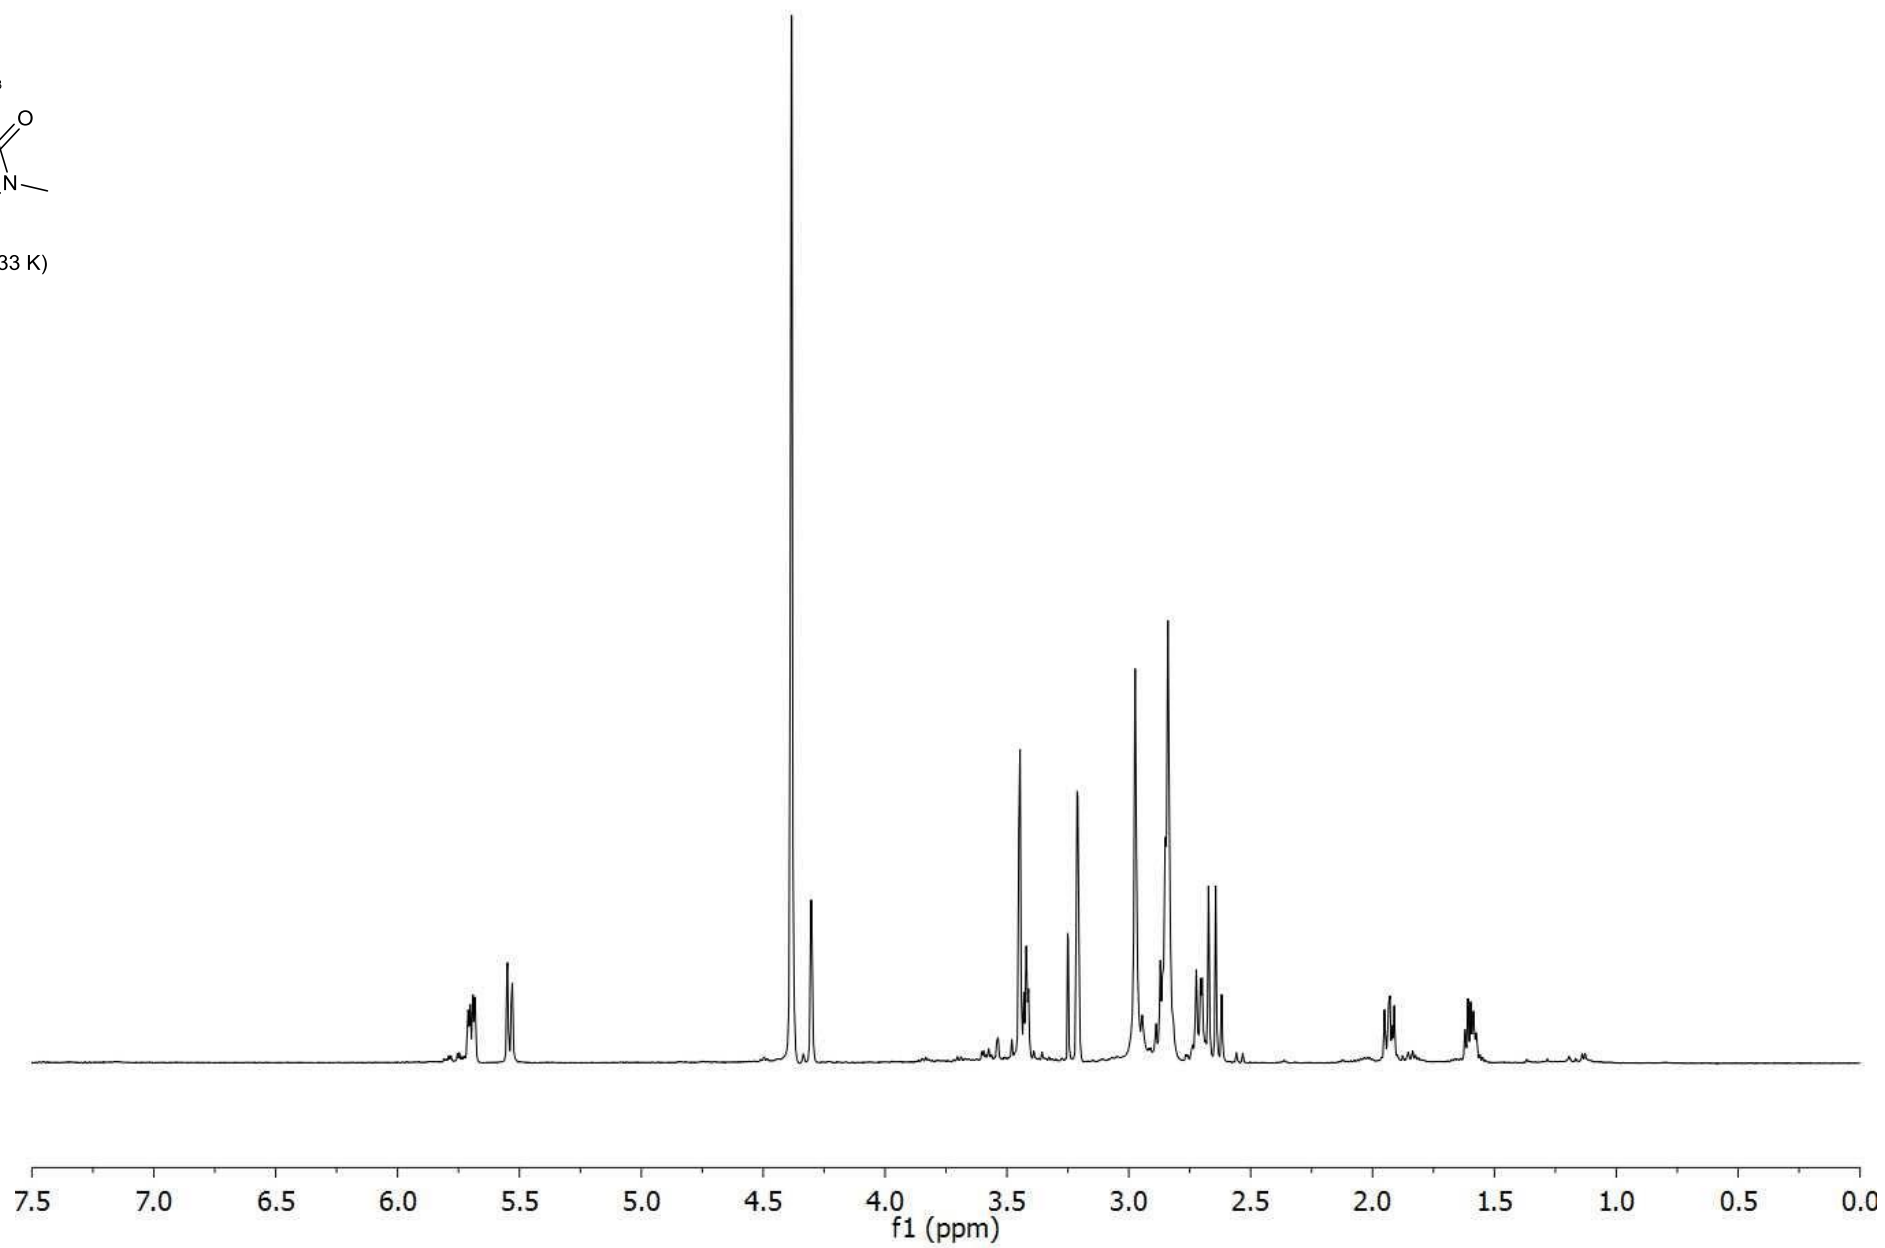

300

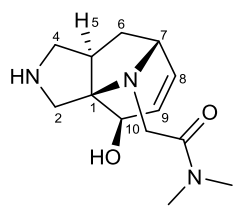

**F3**  
(MeOD-d<sub>4</sub> @ 333 K)

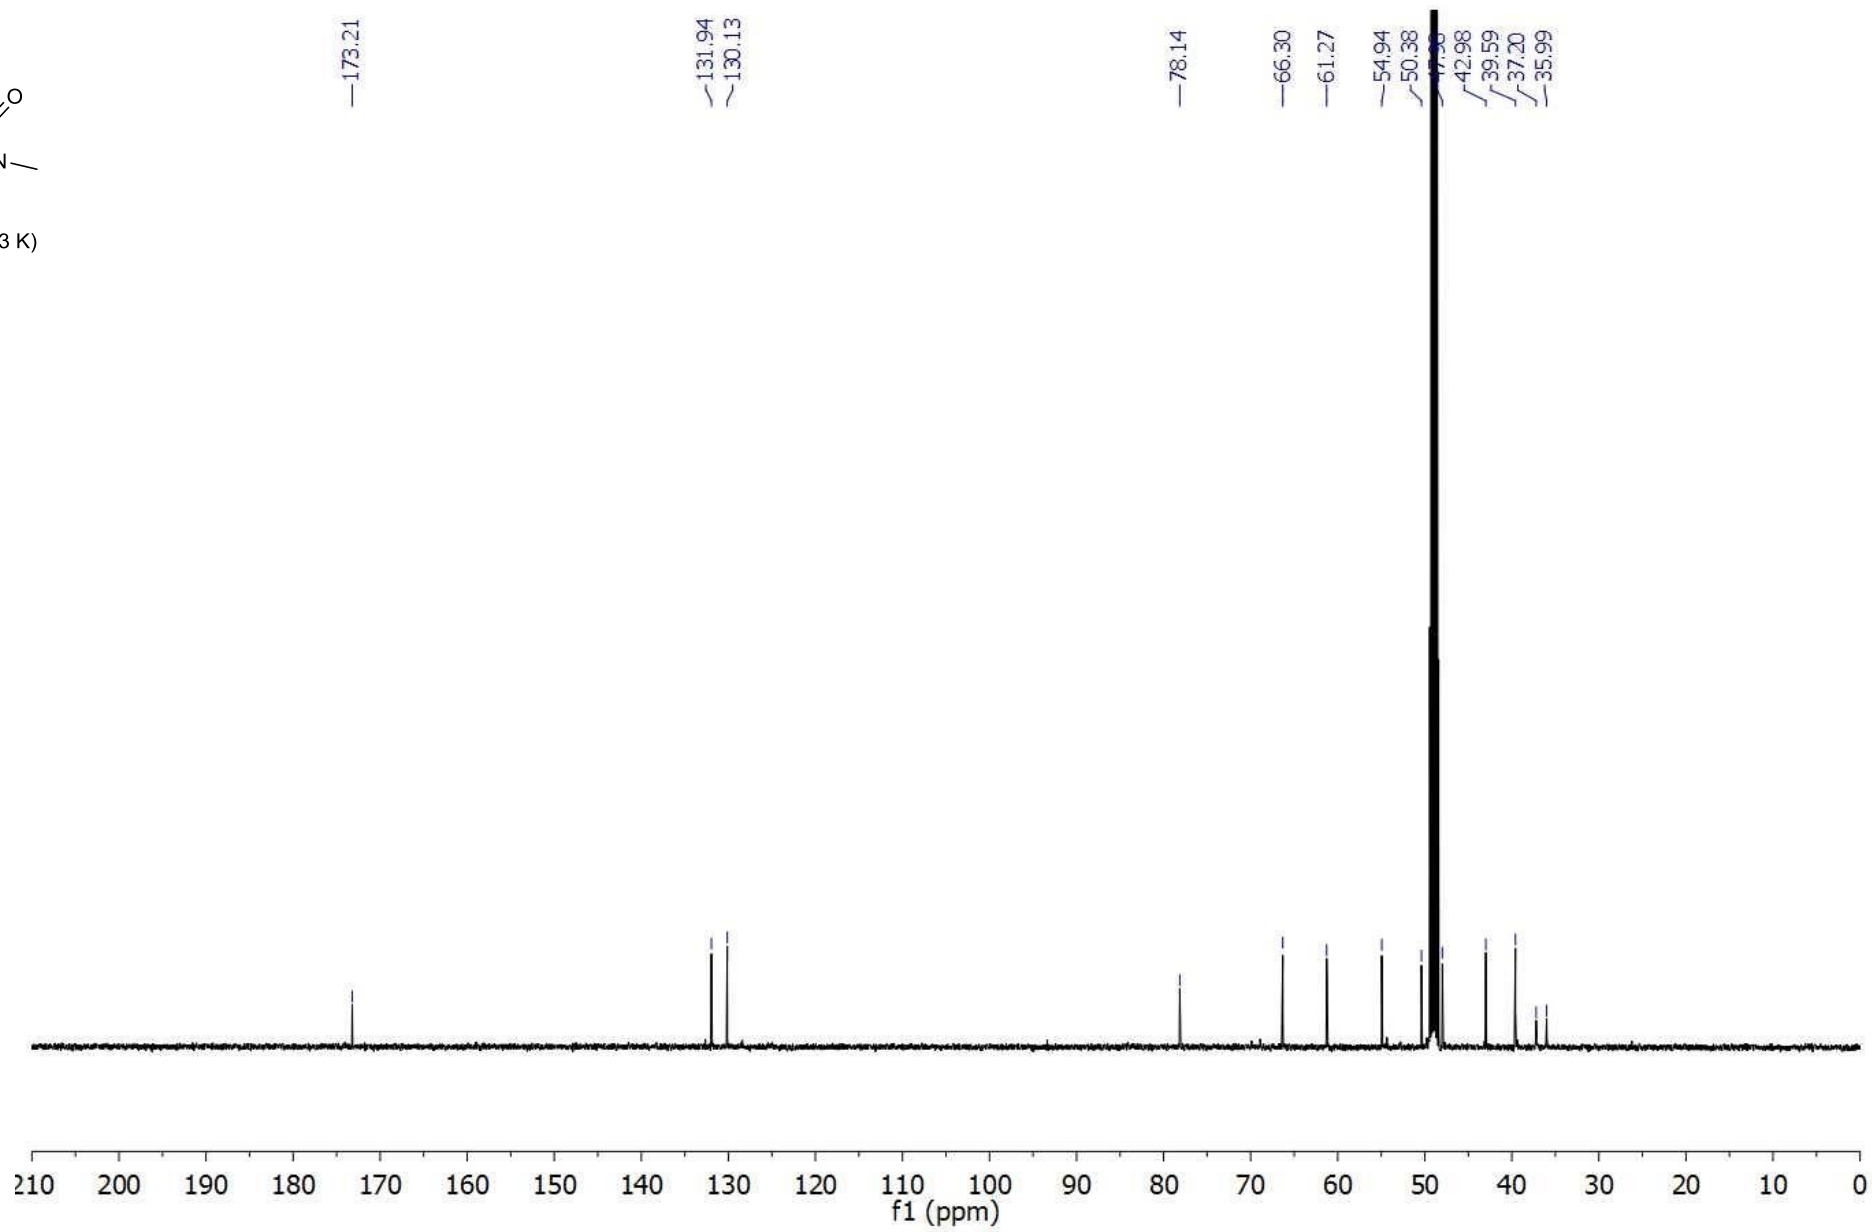

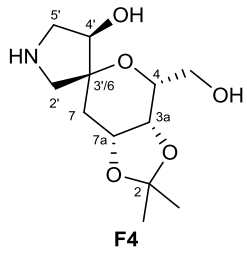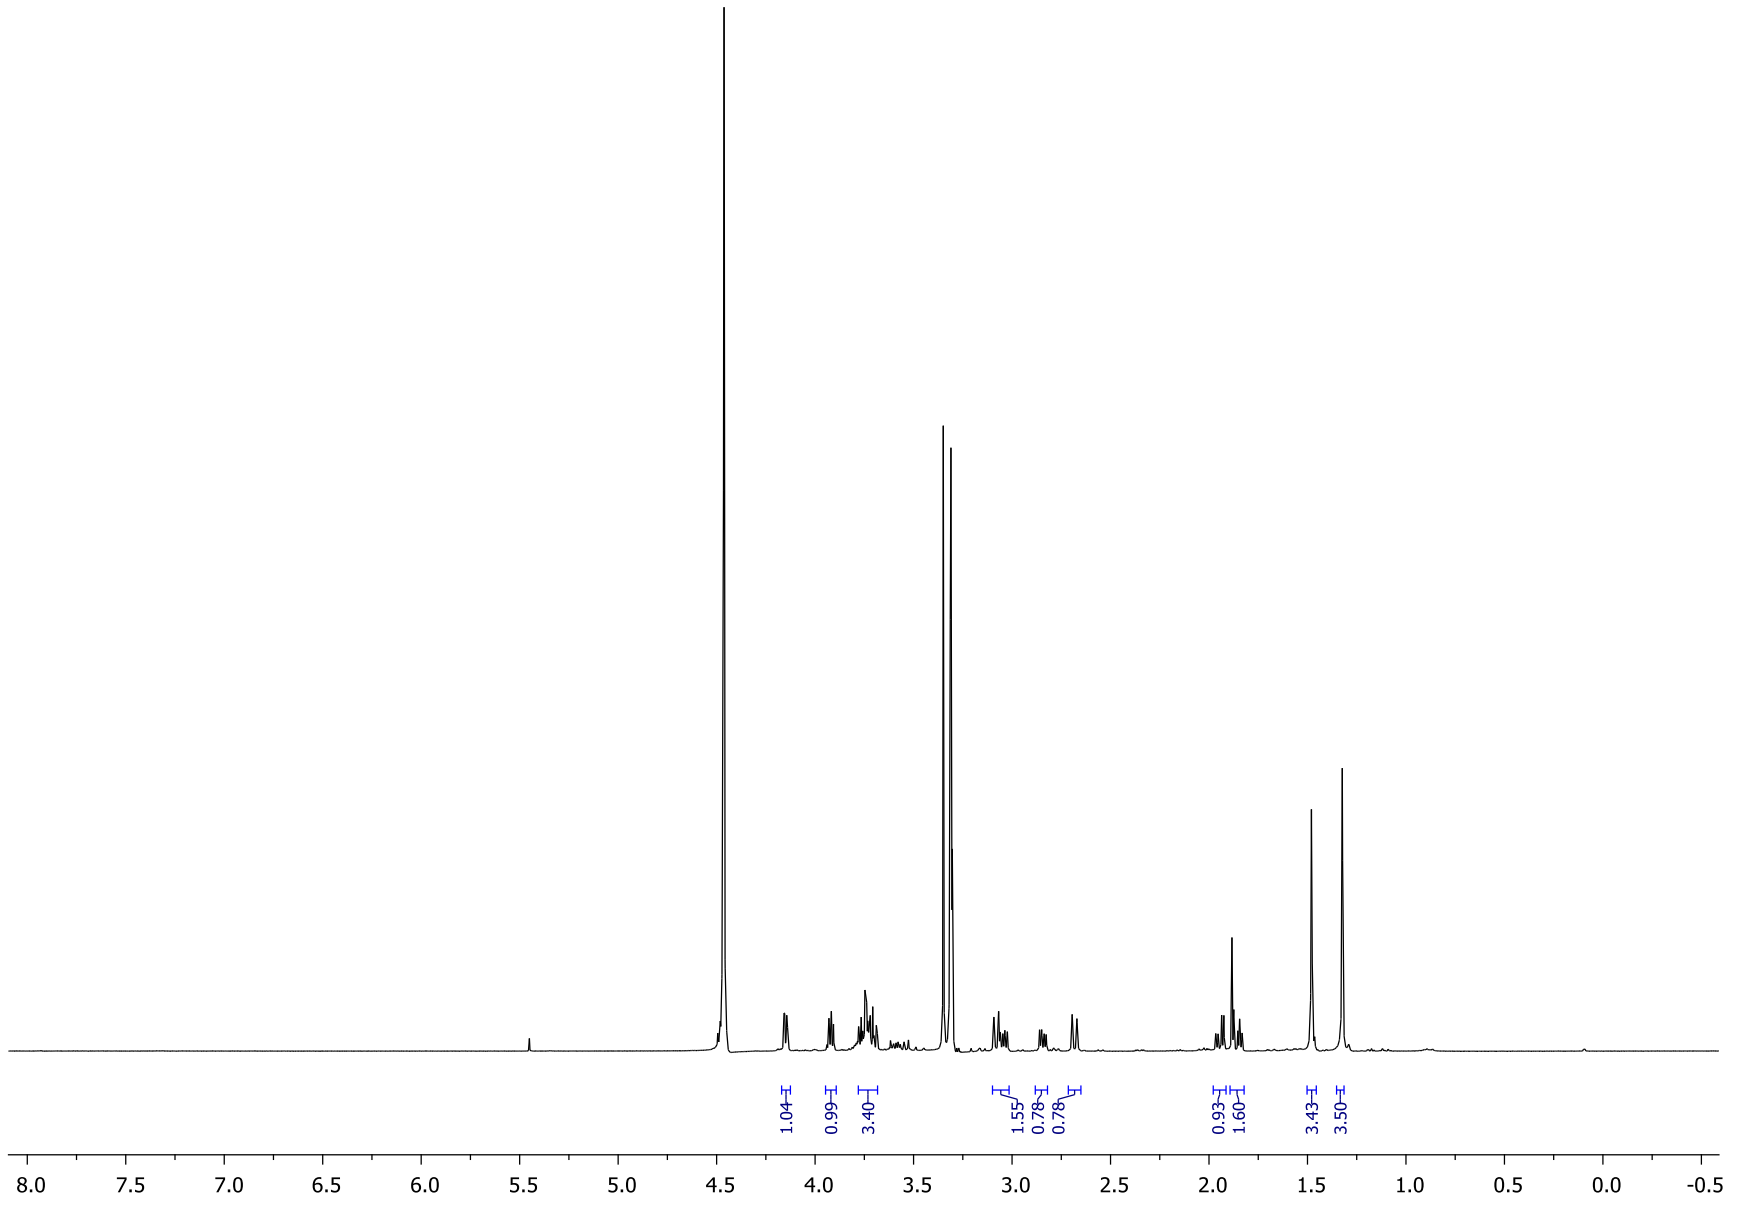

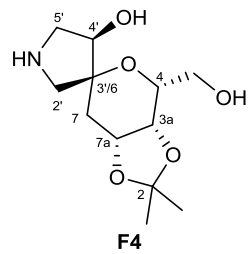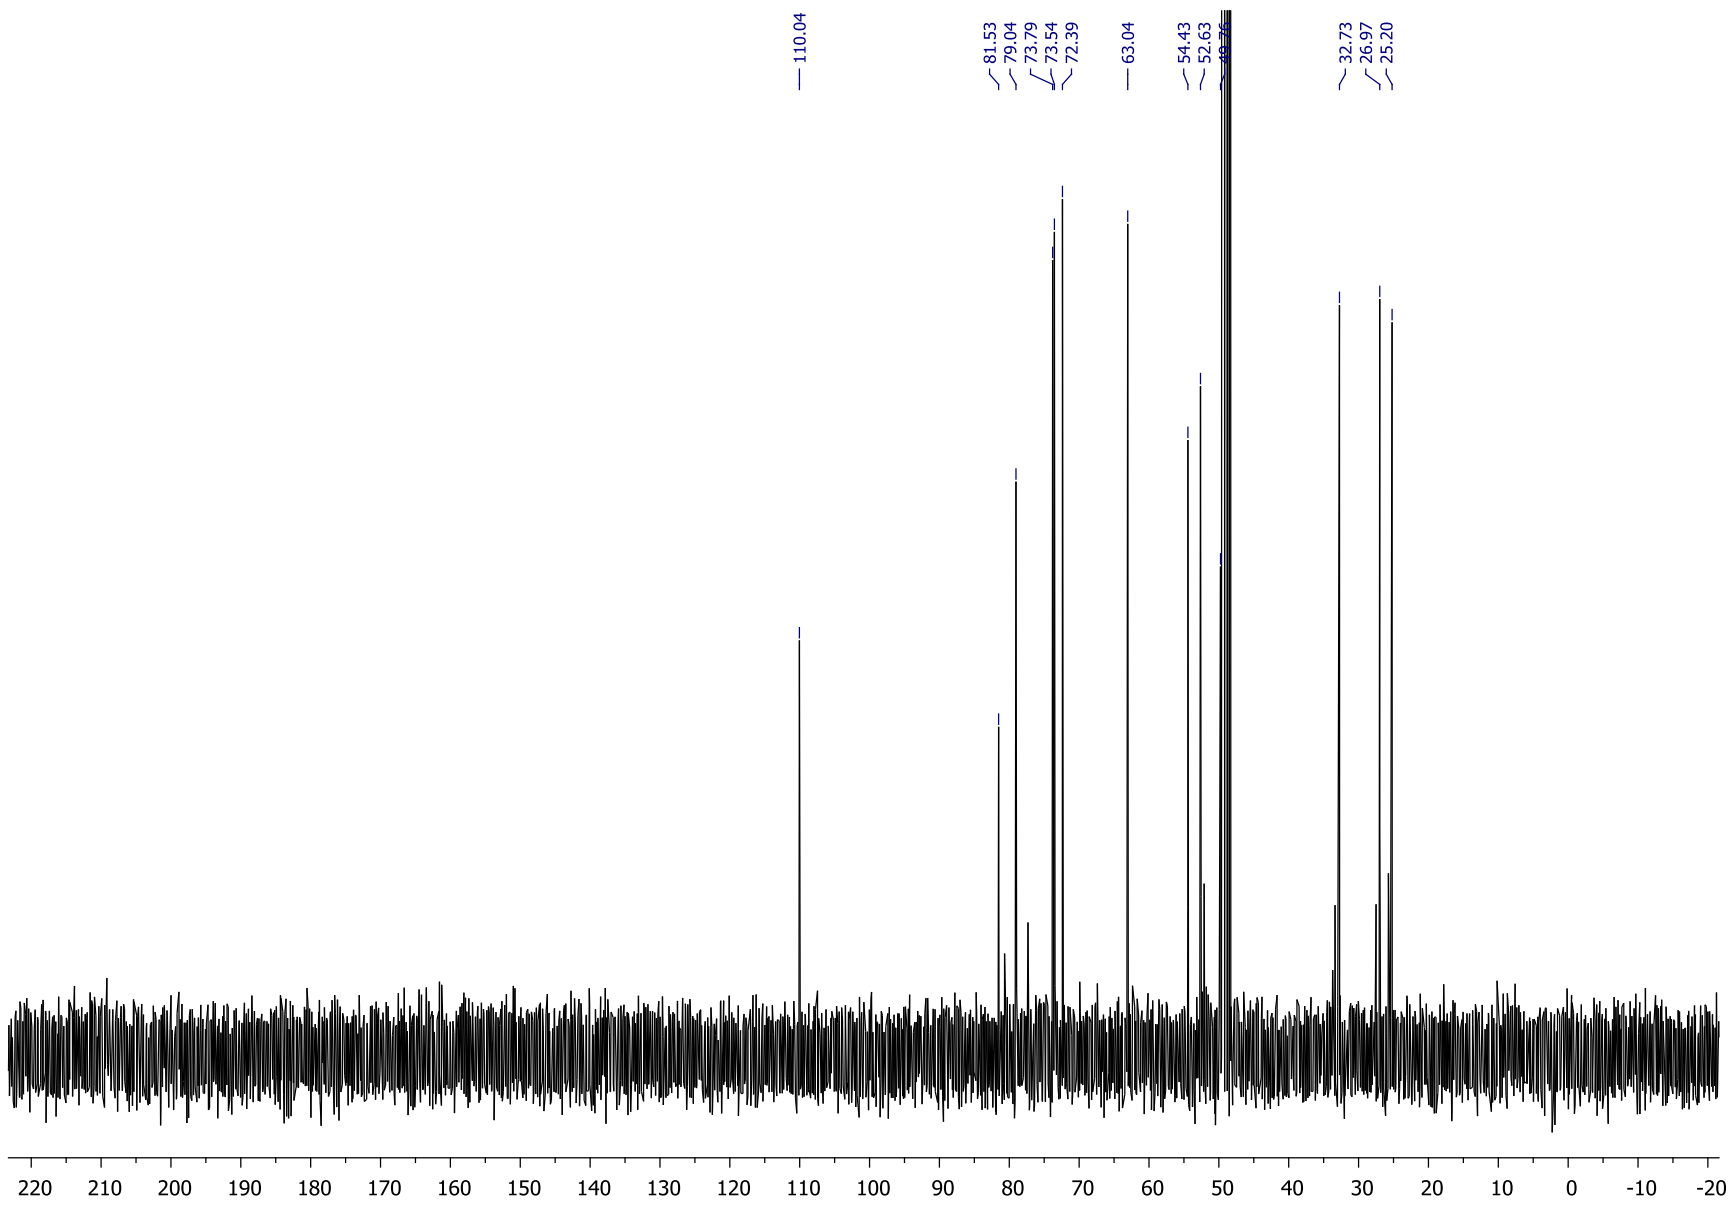

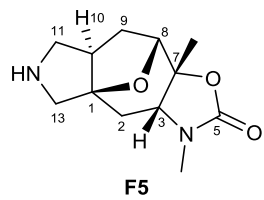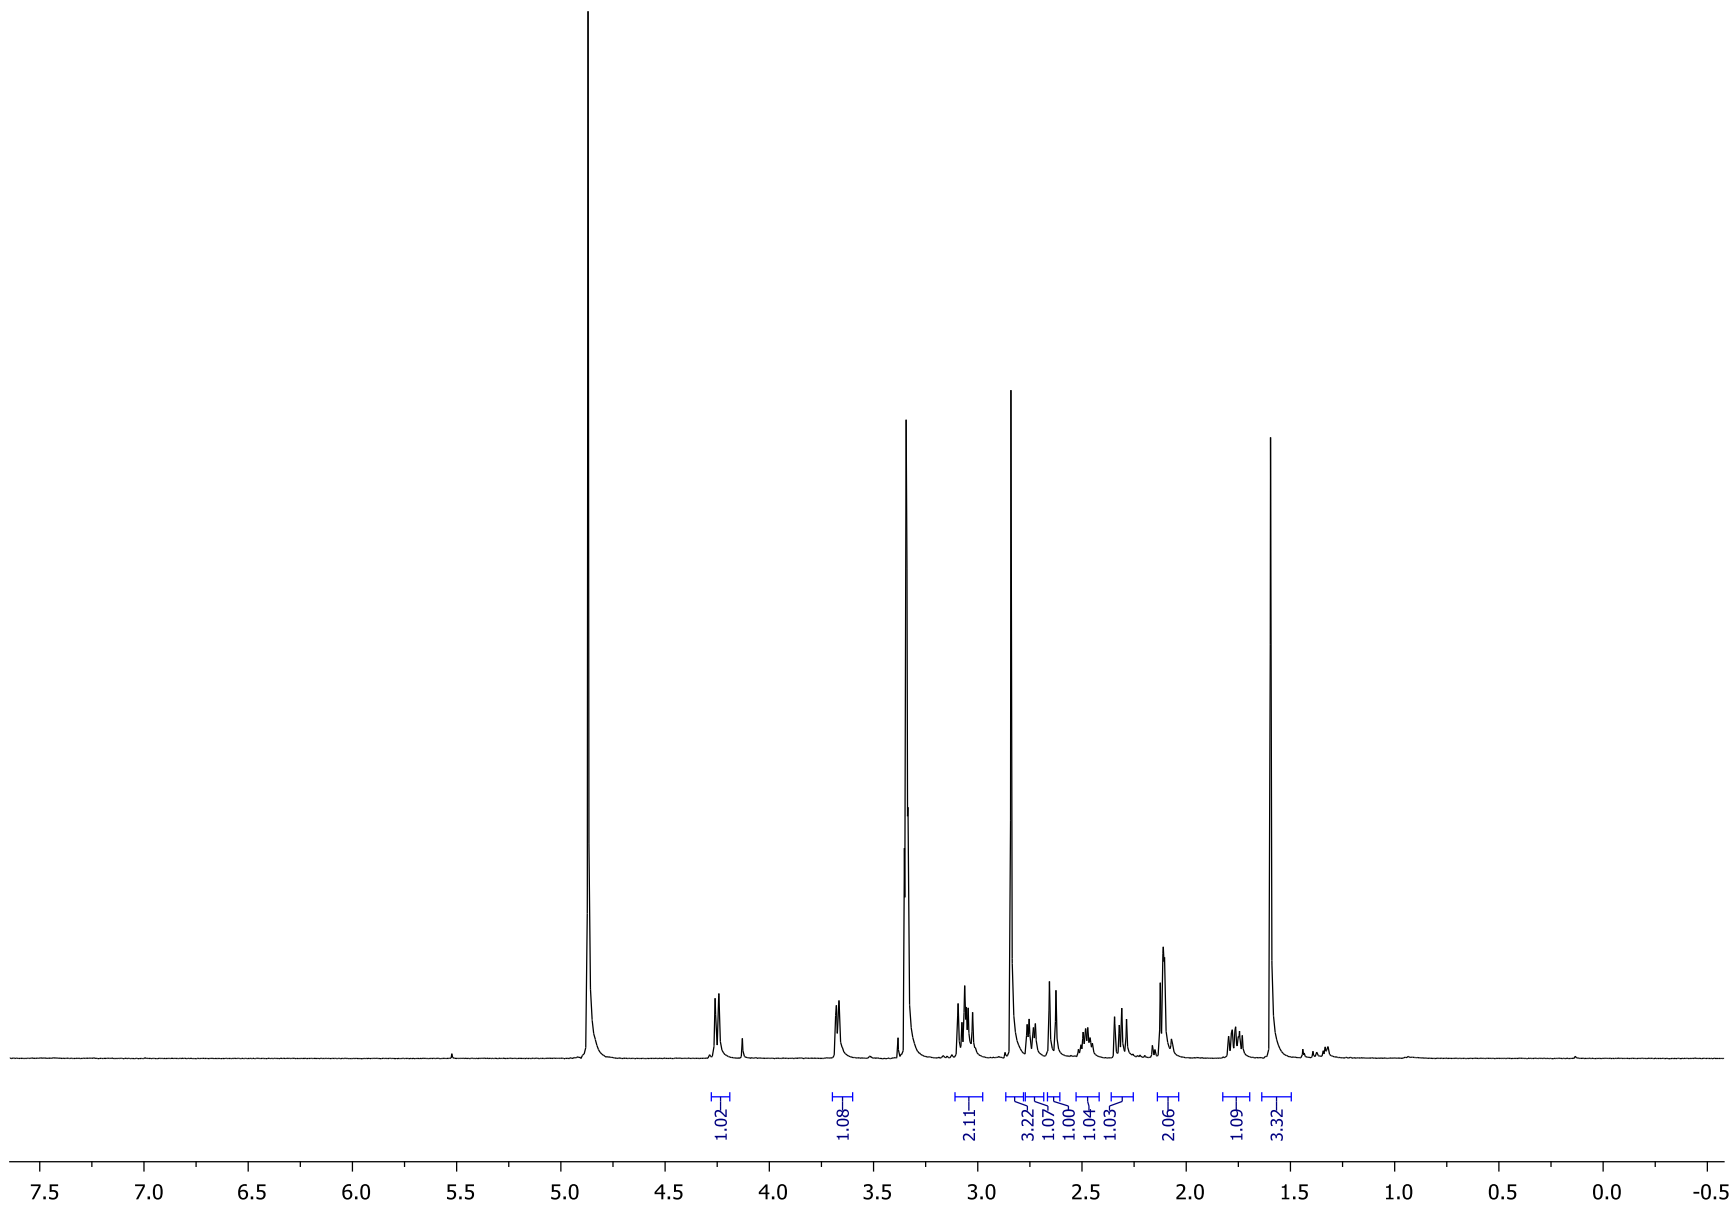

304

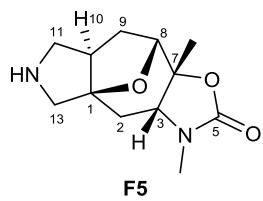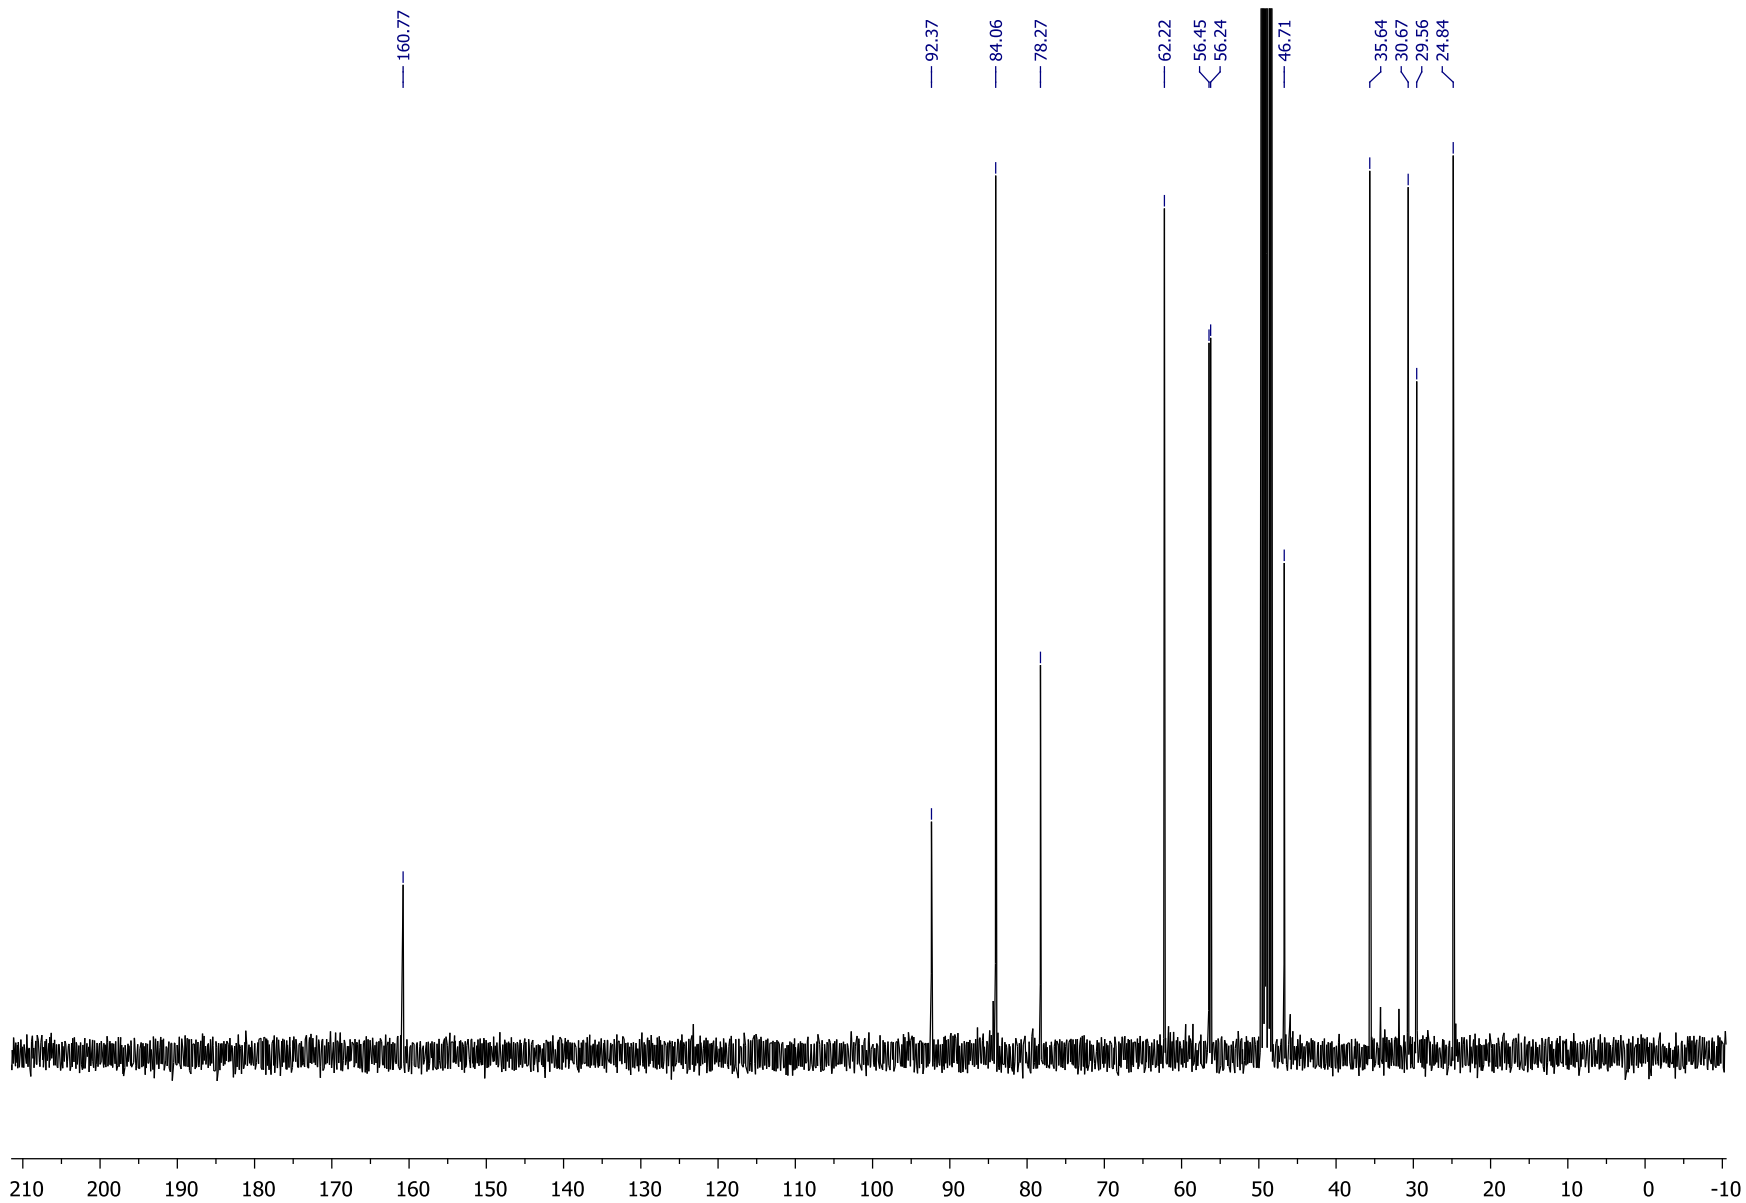

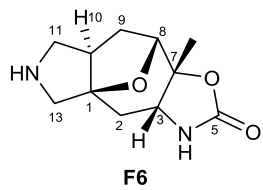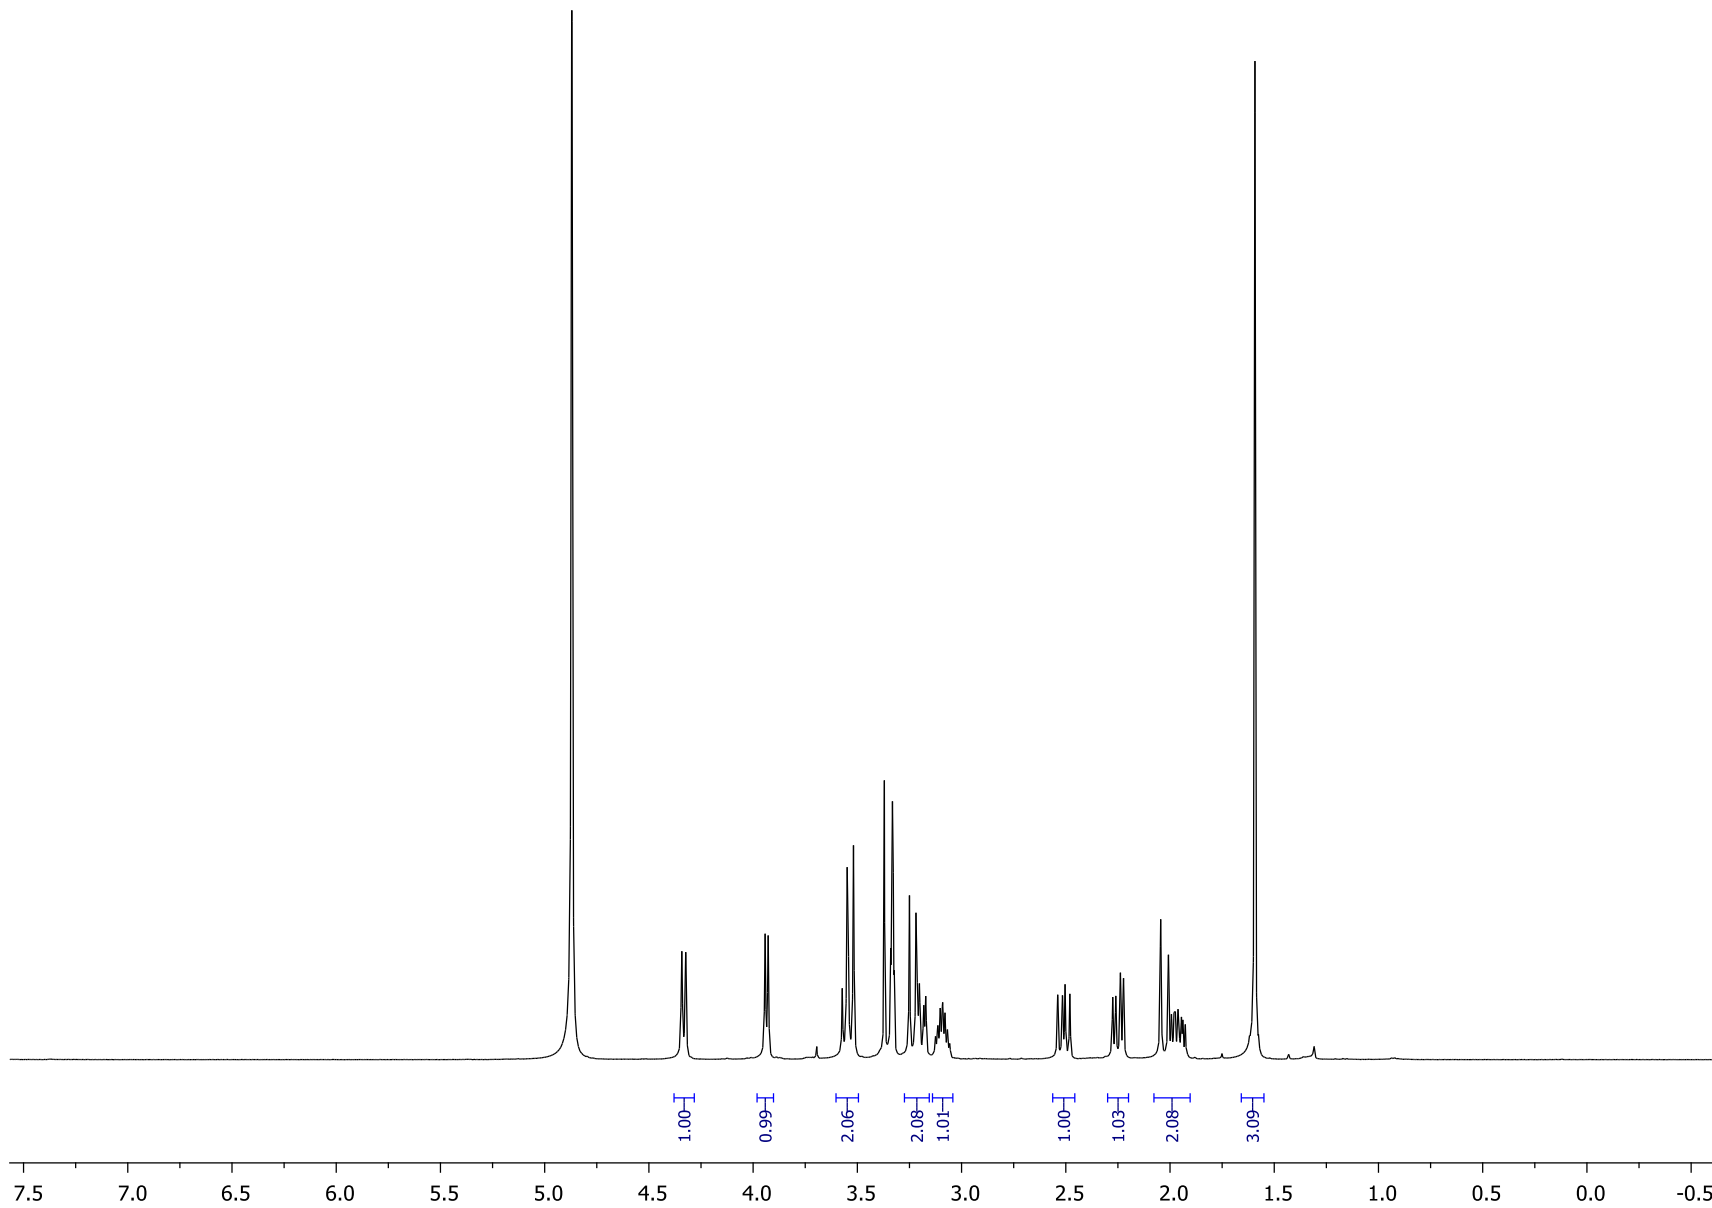

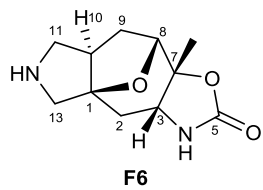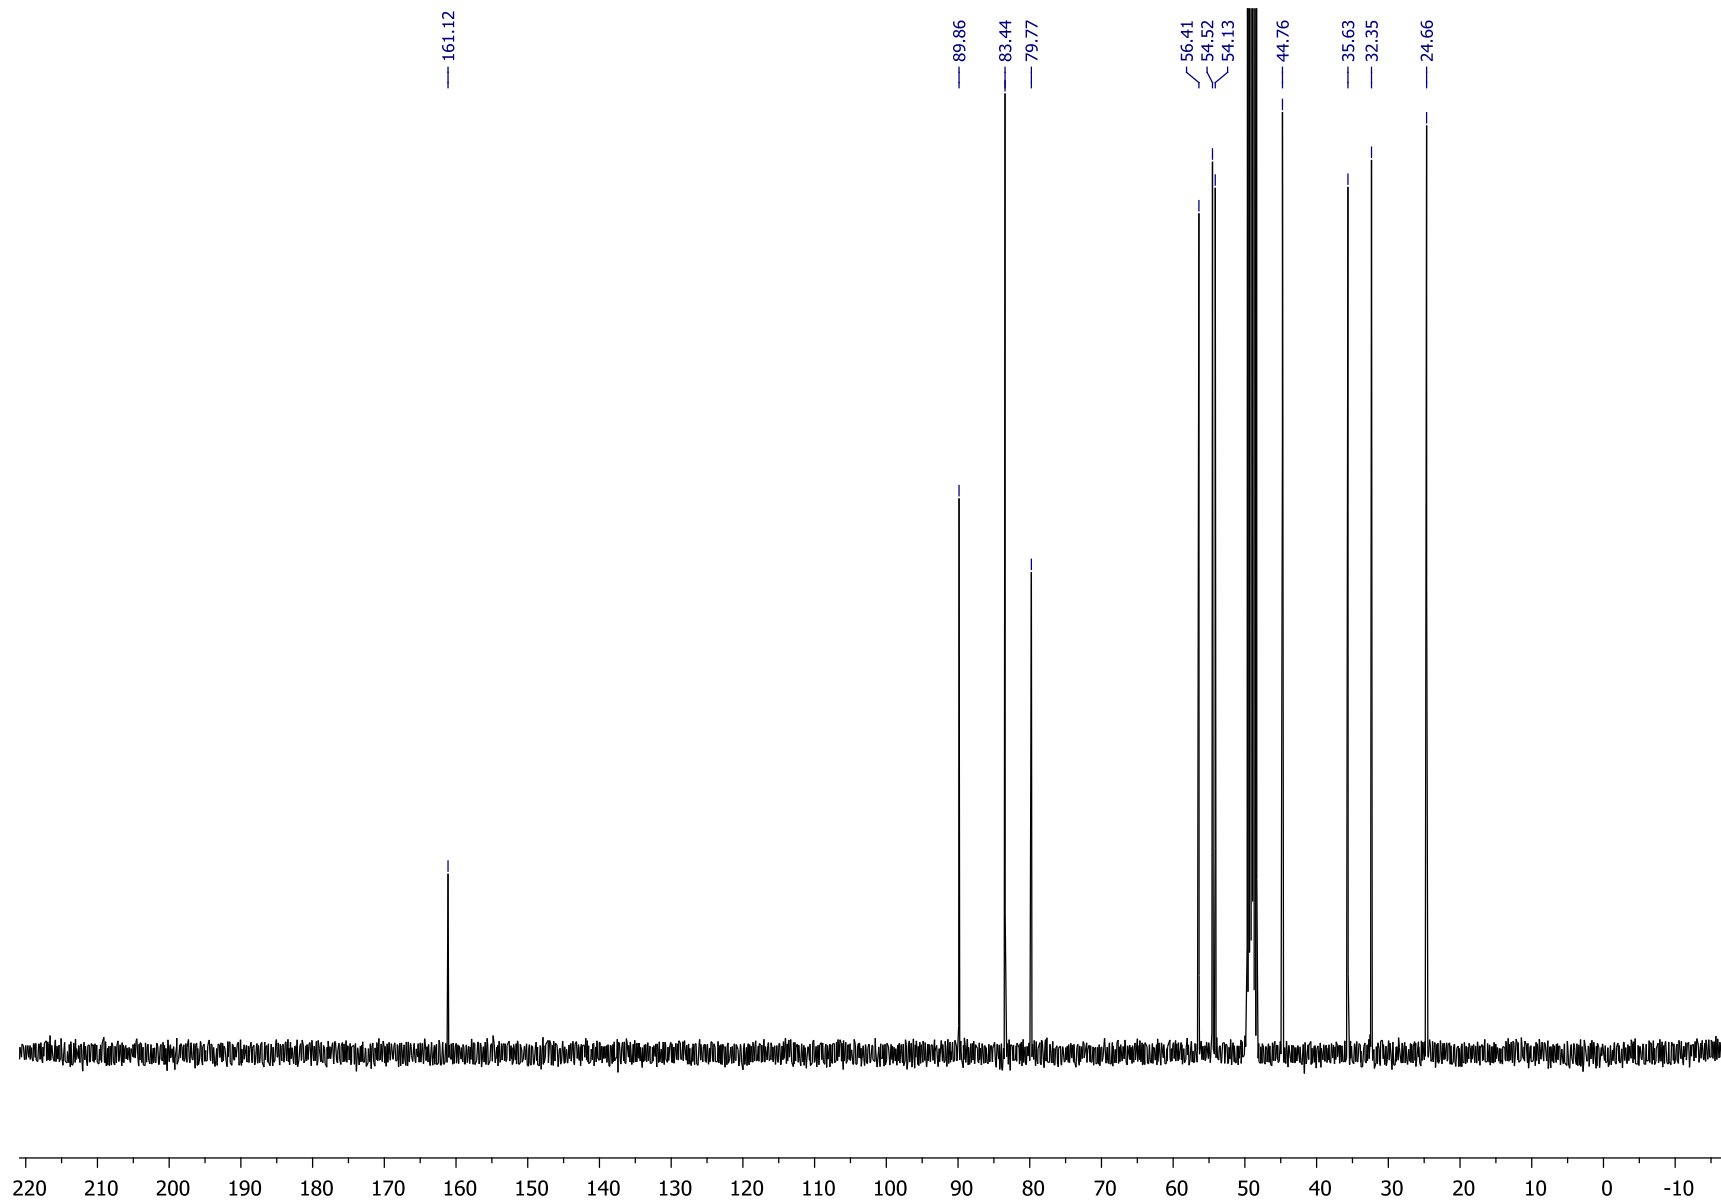



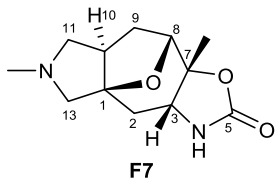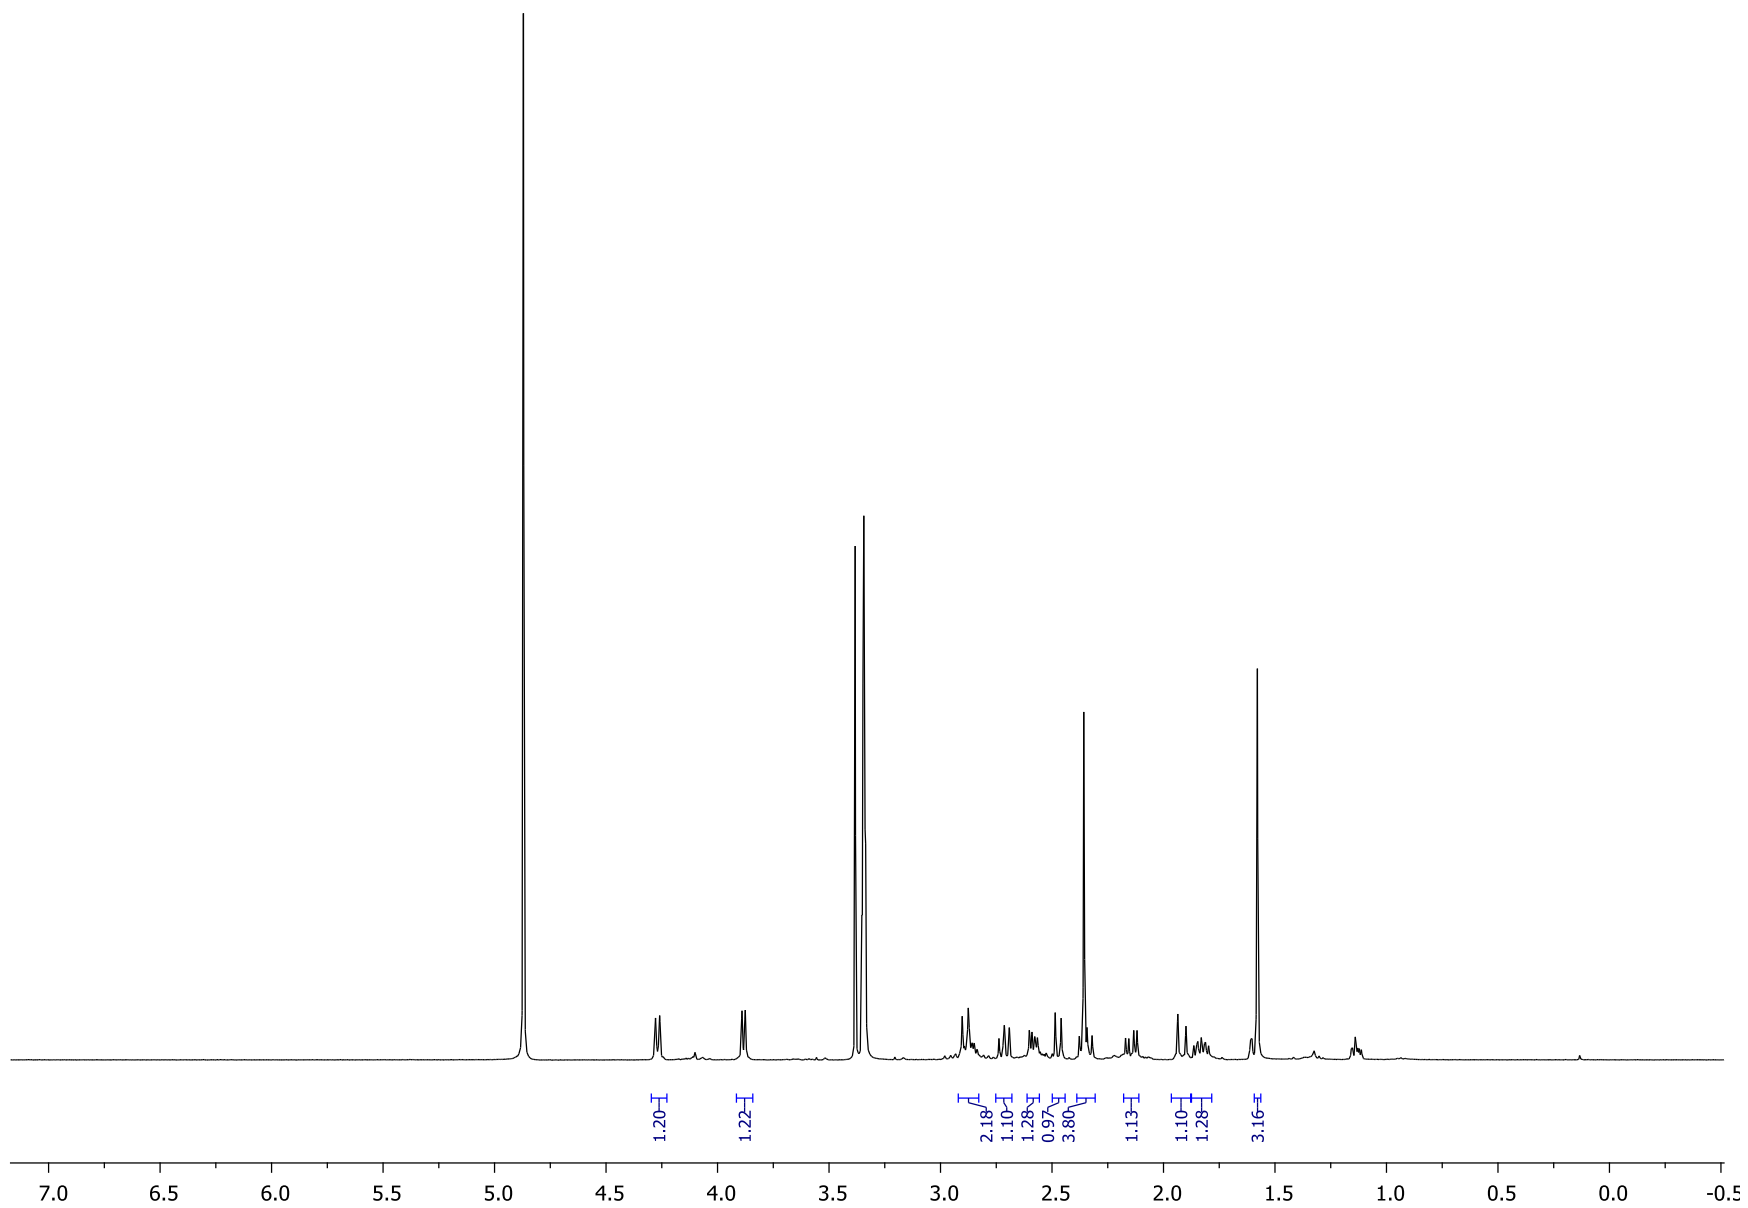

308

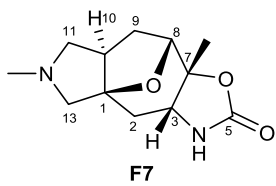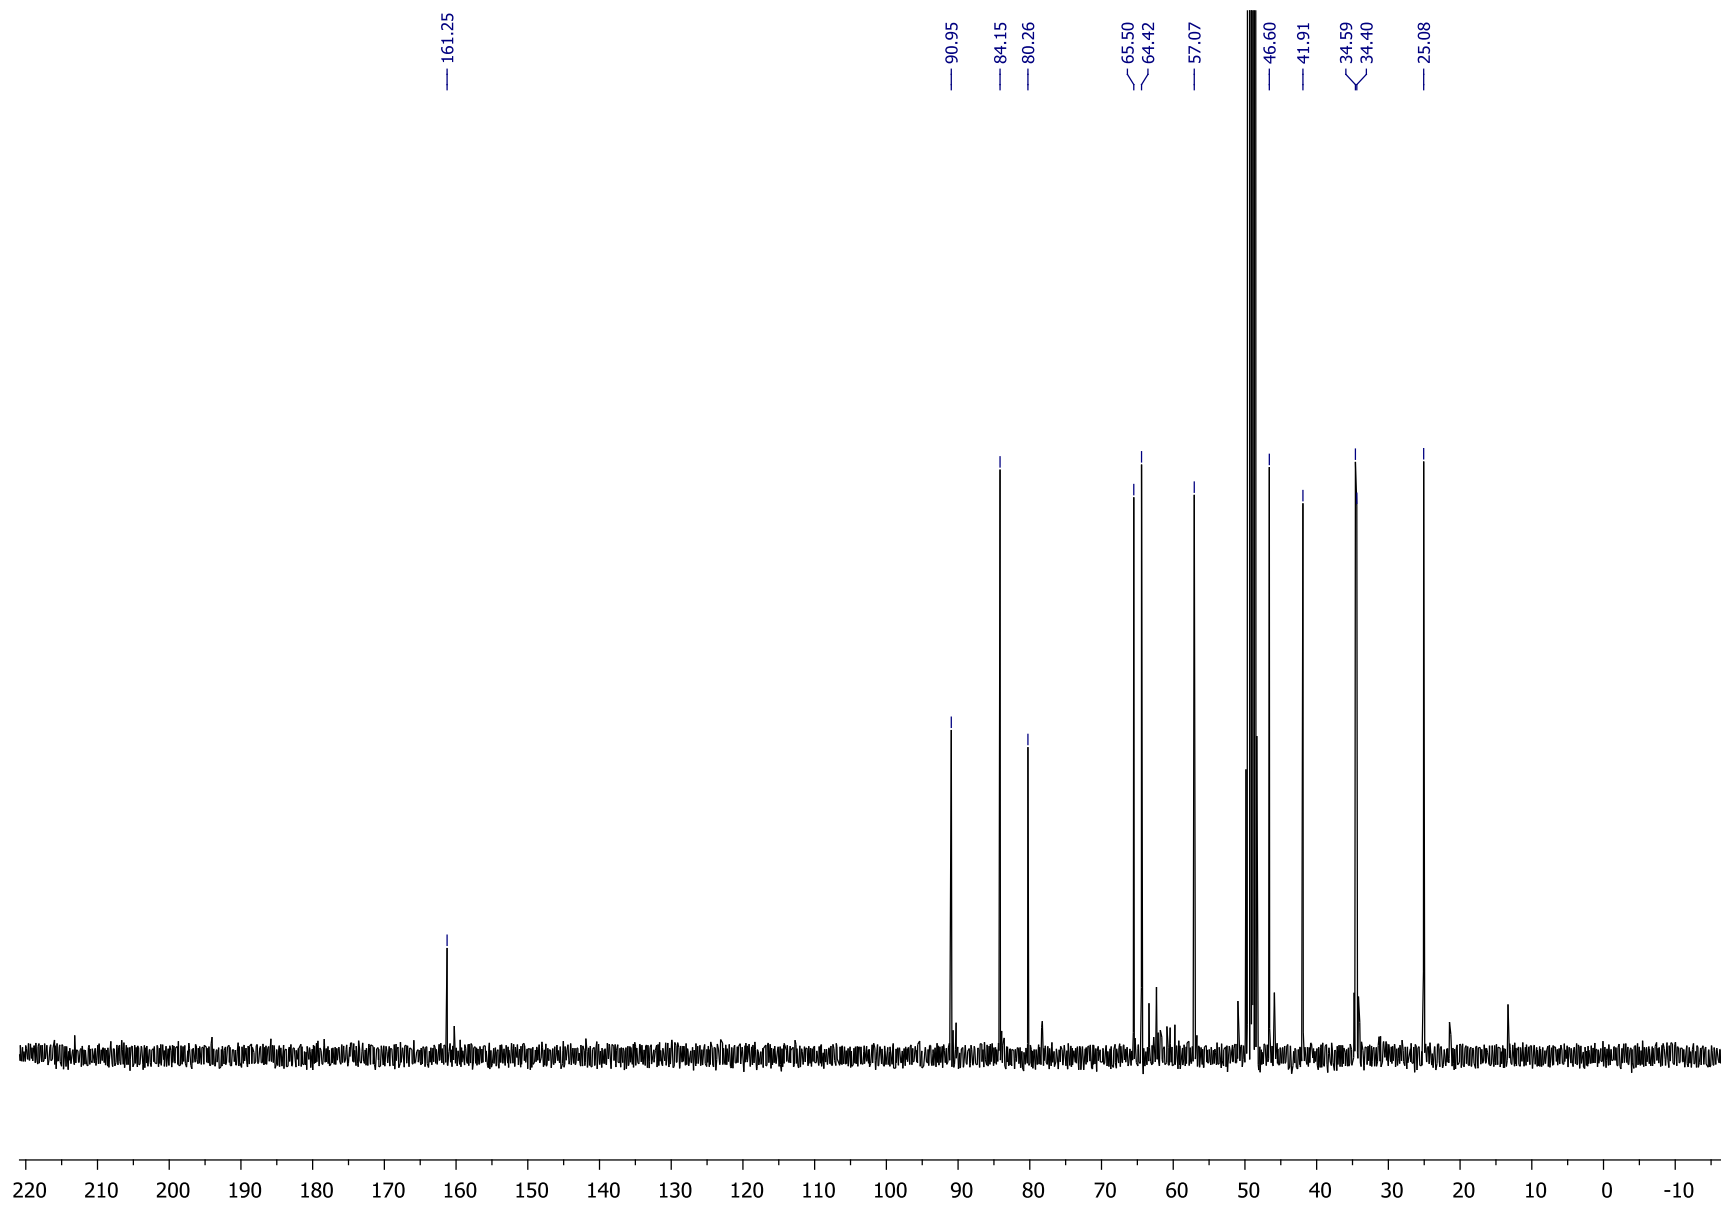

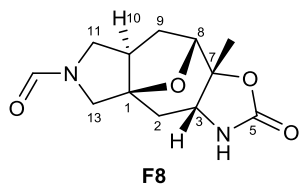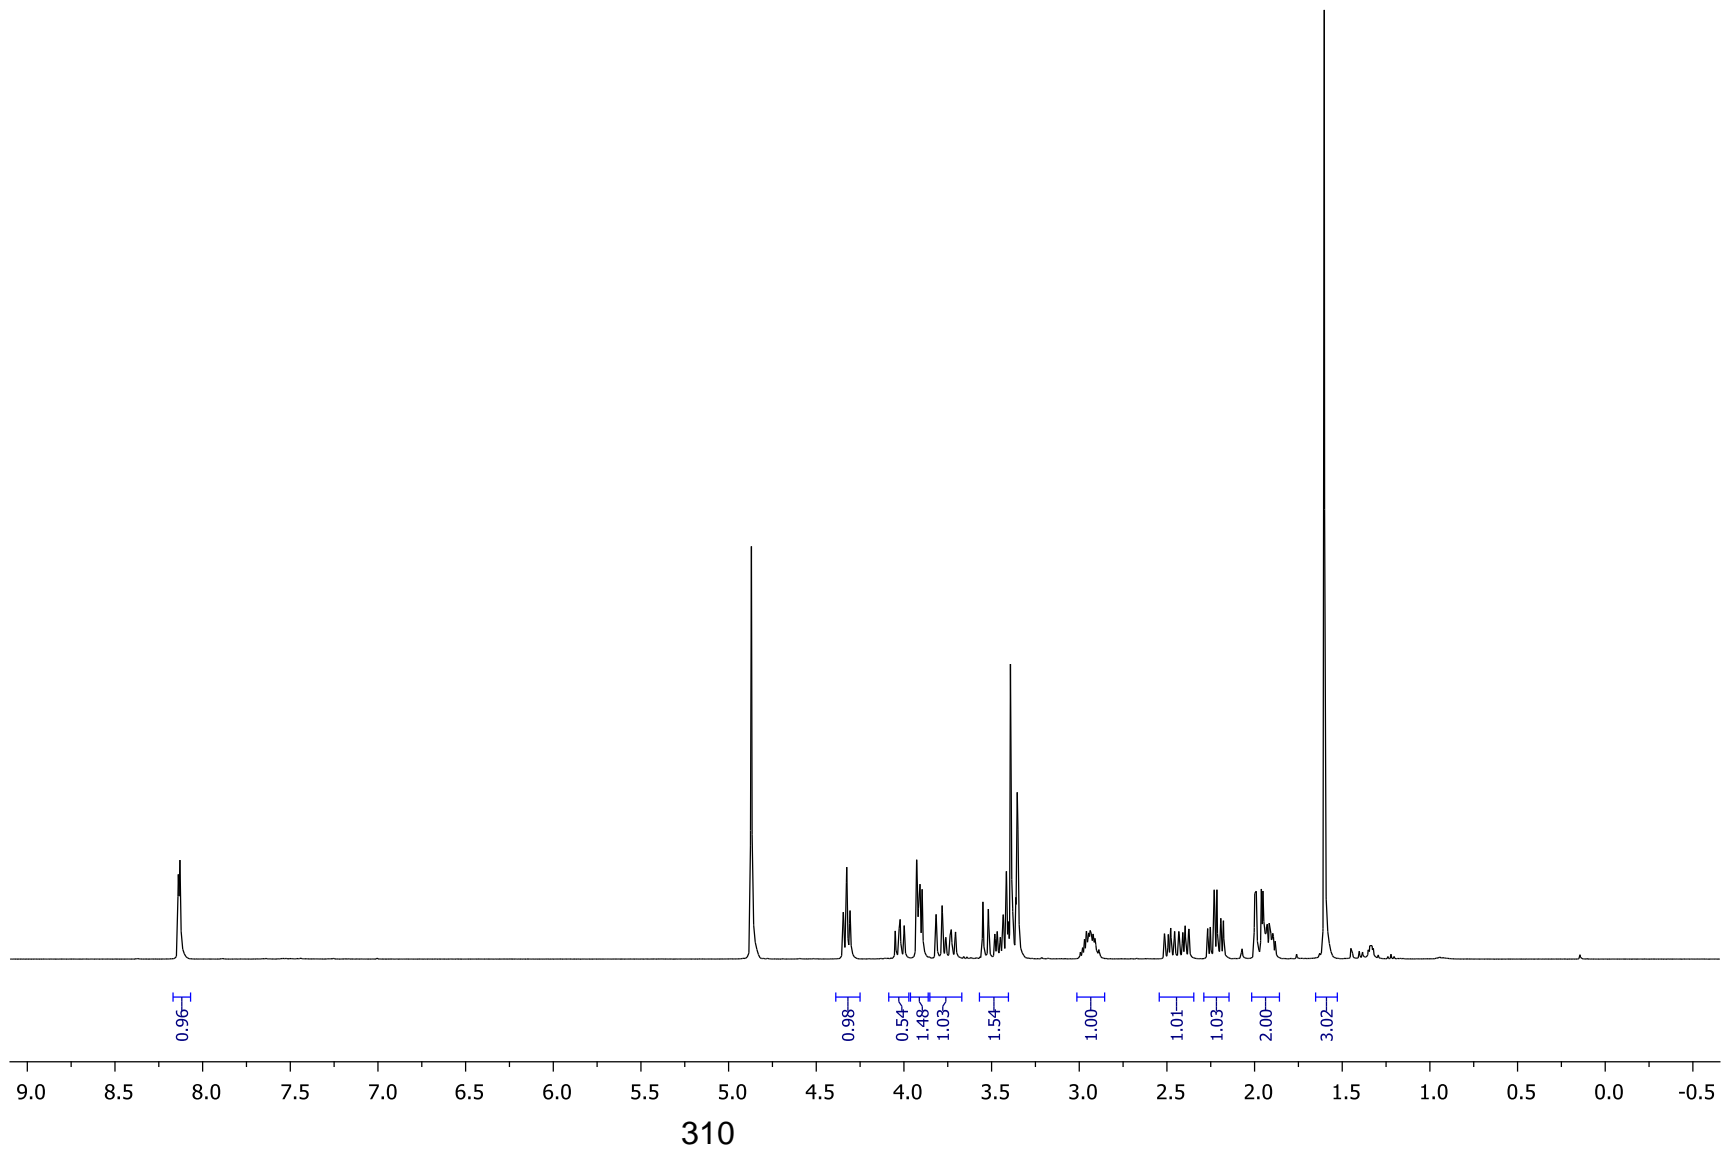

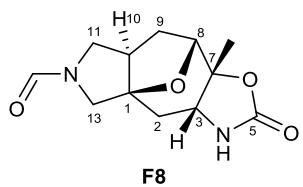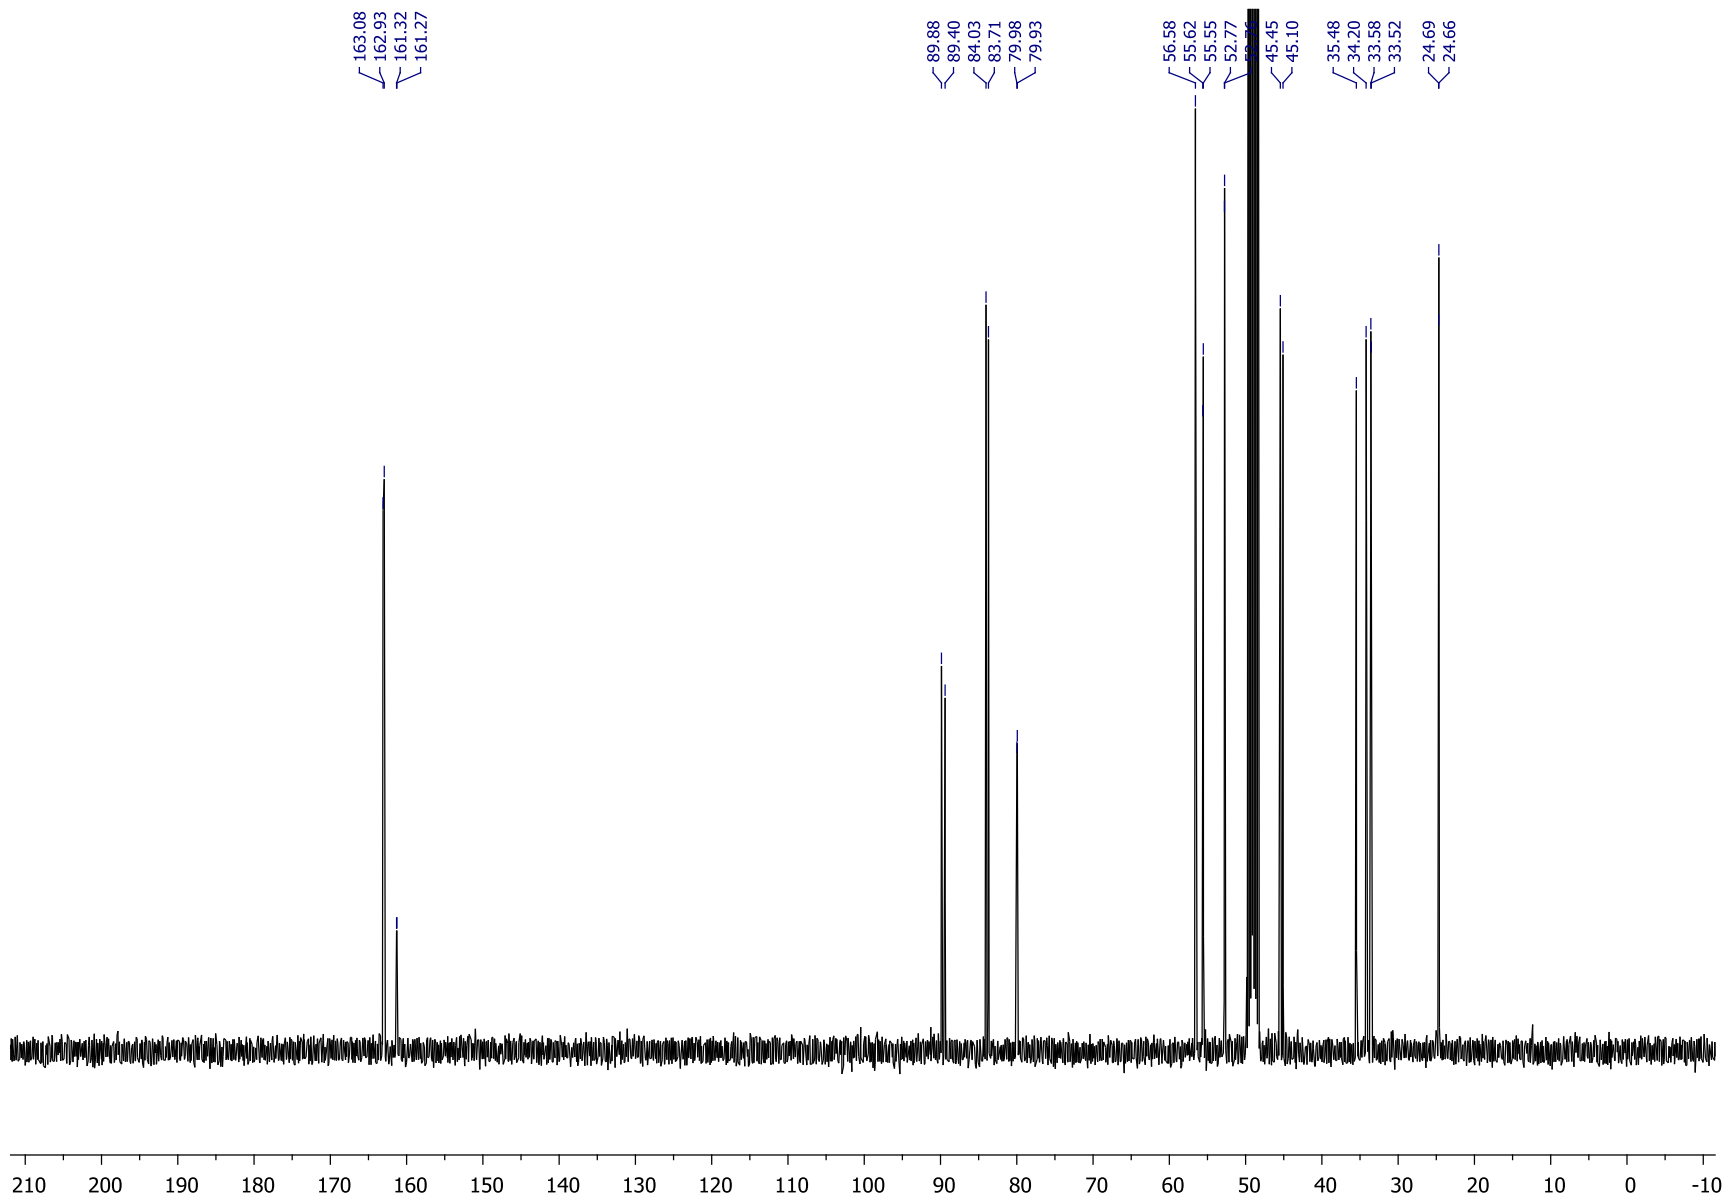

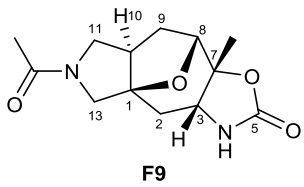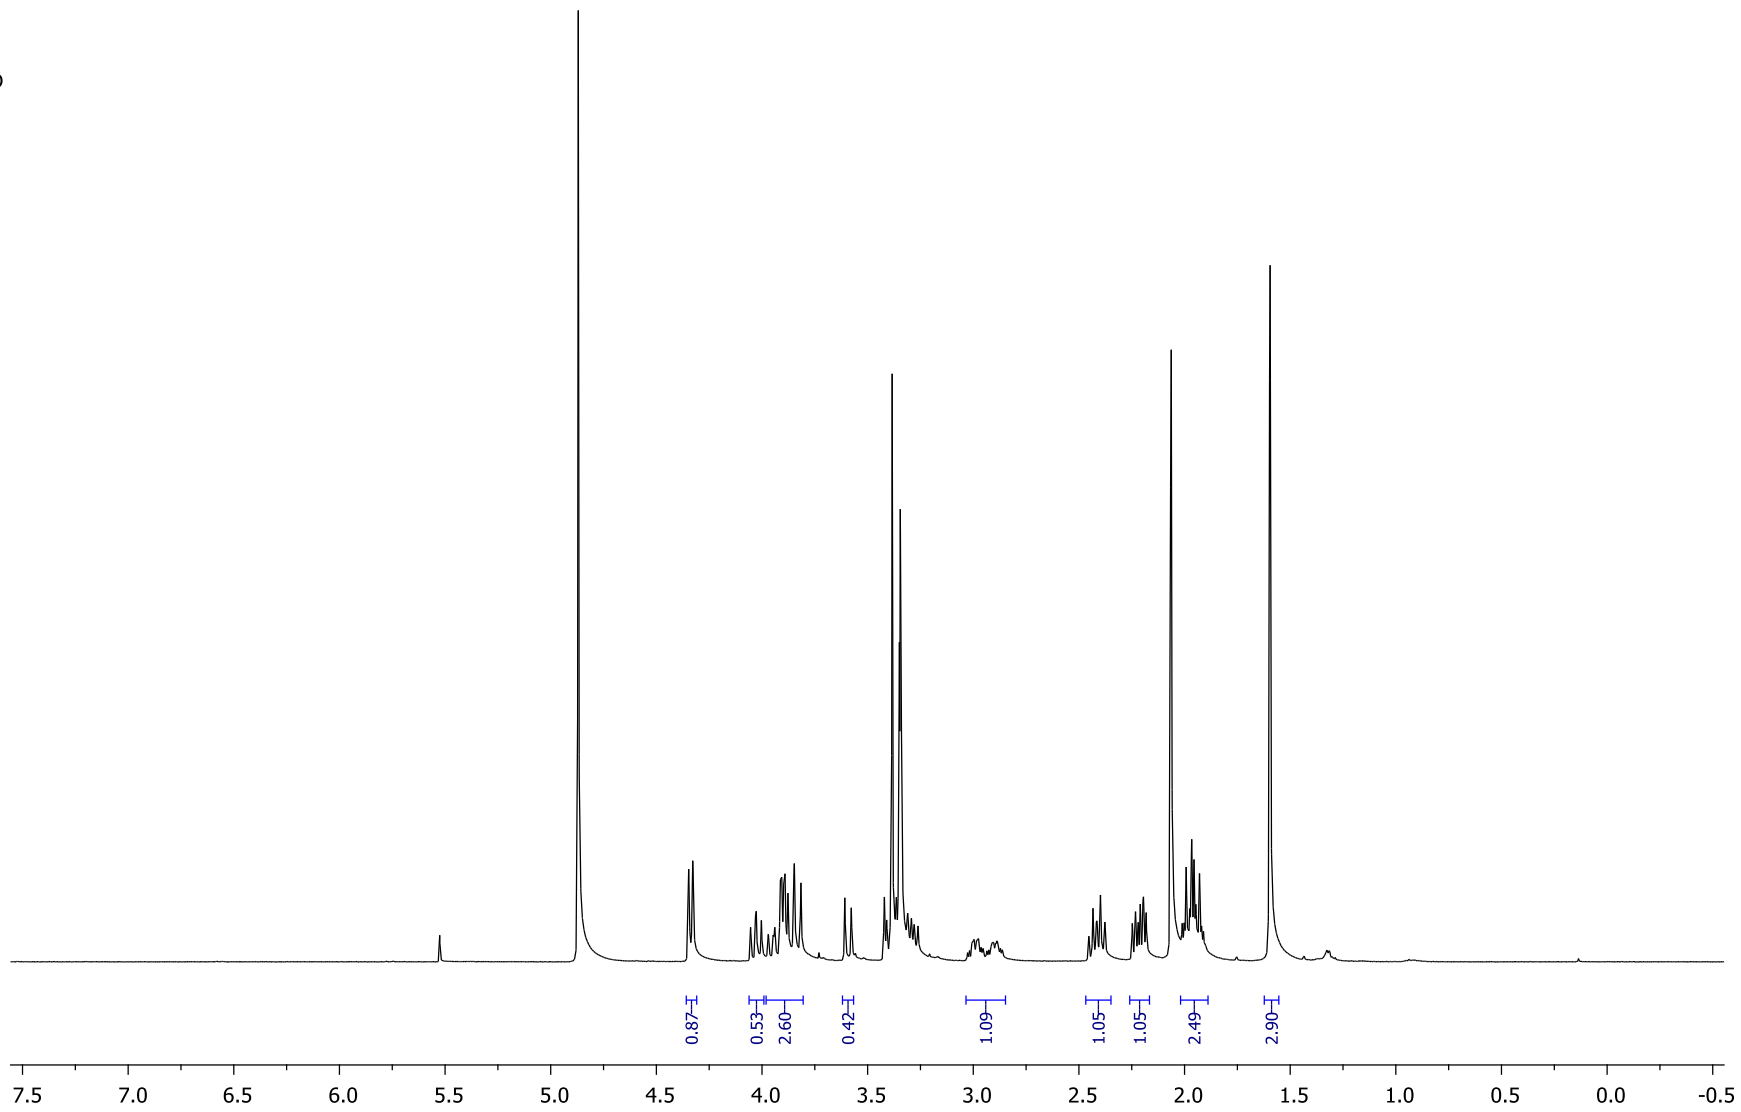

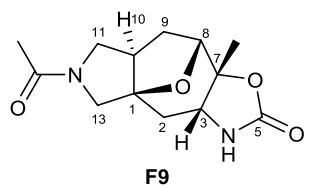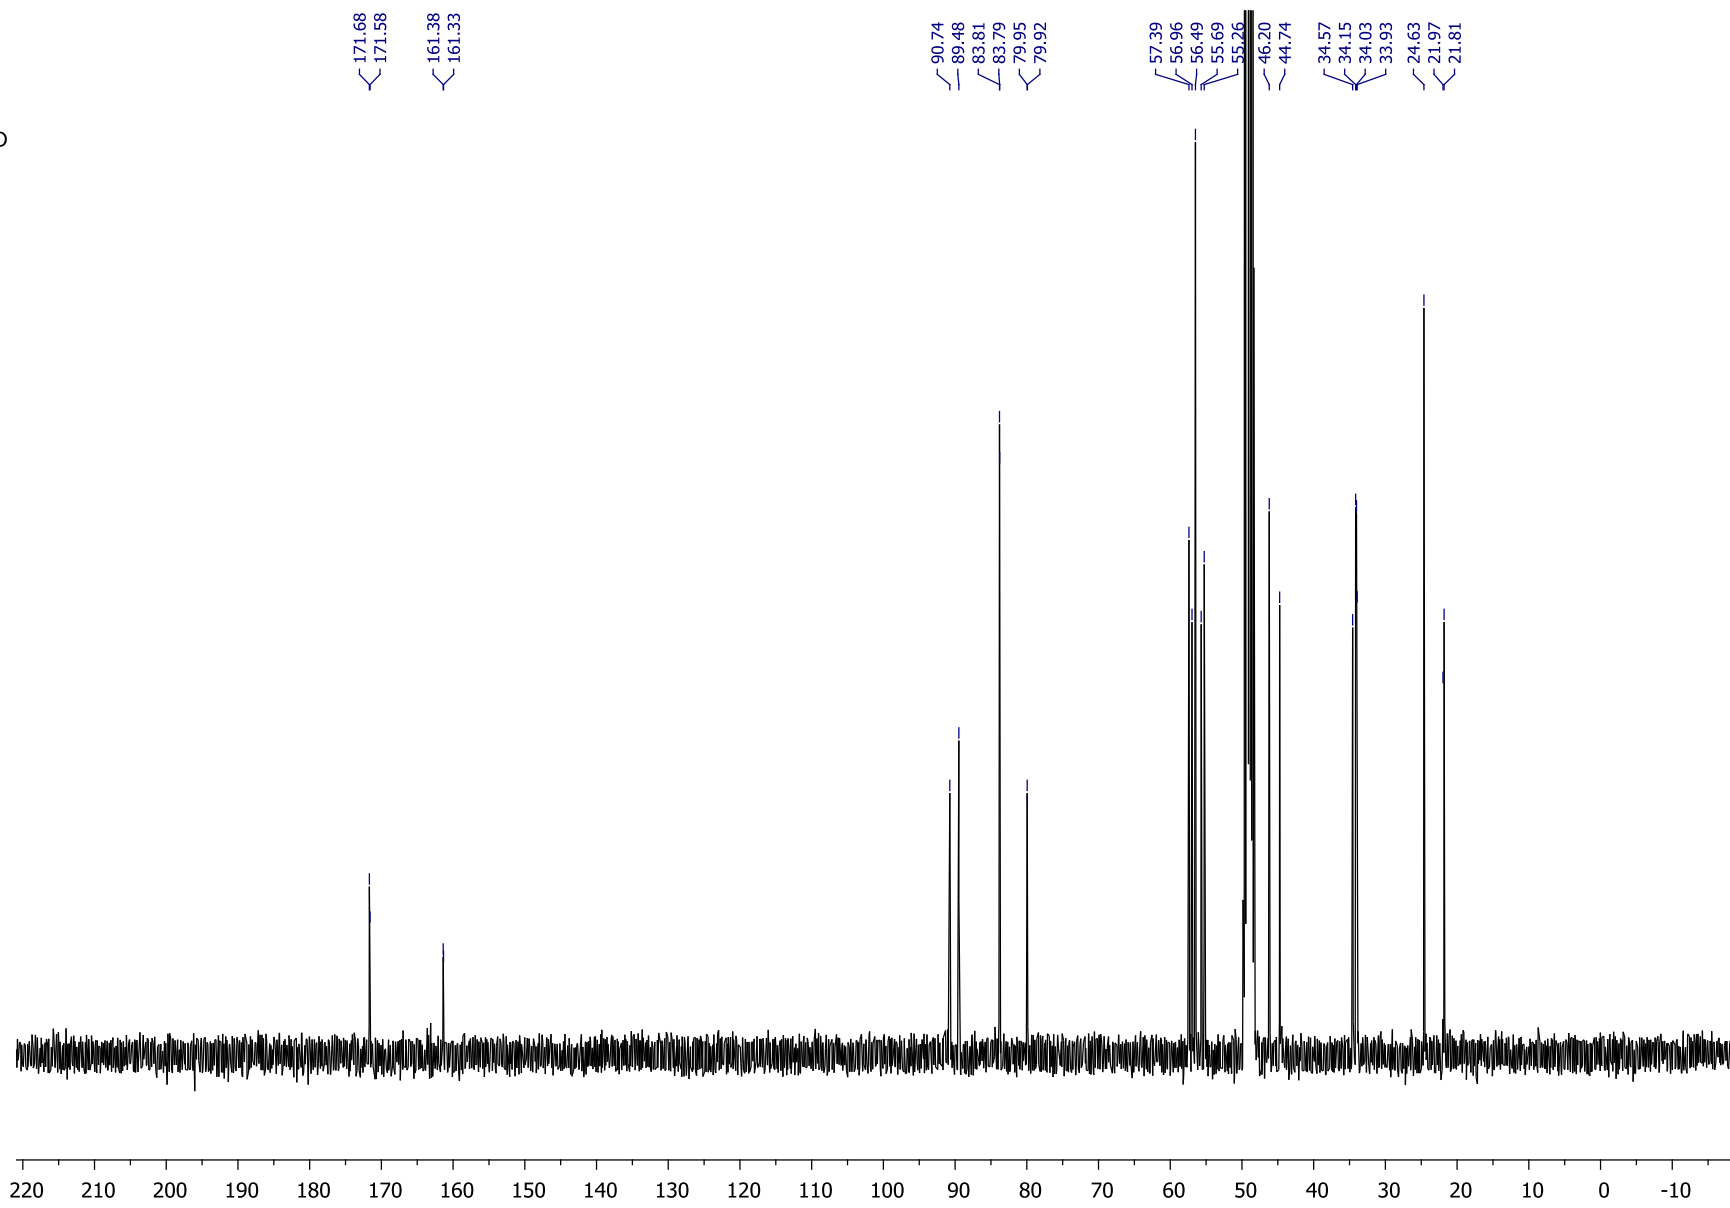

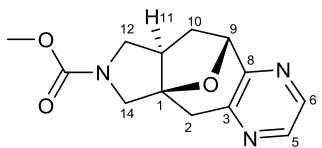

F10

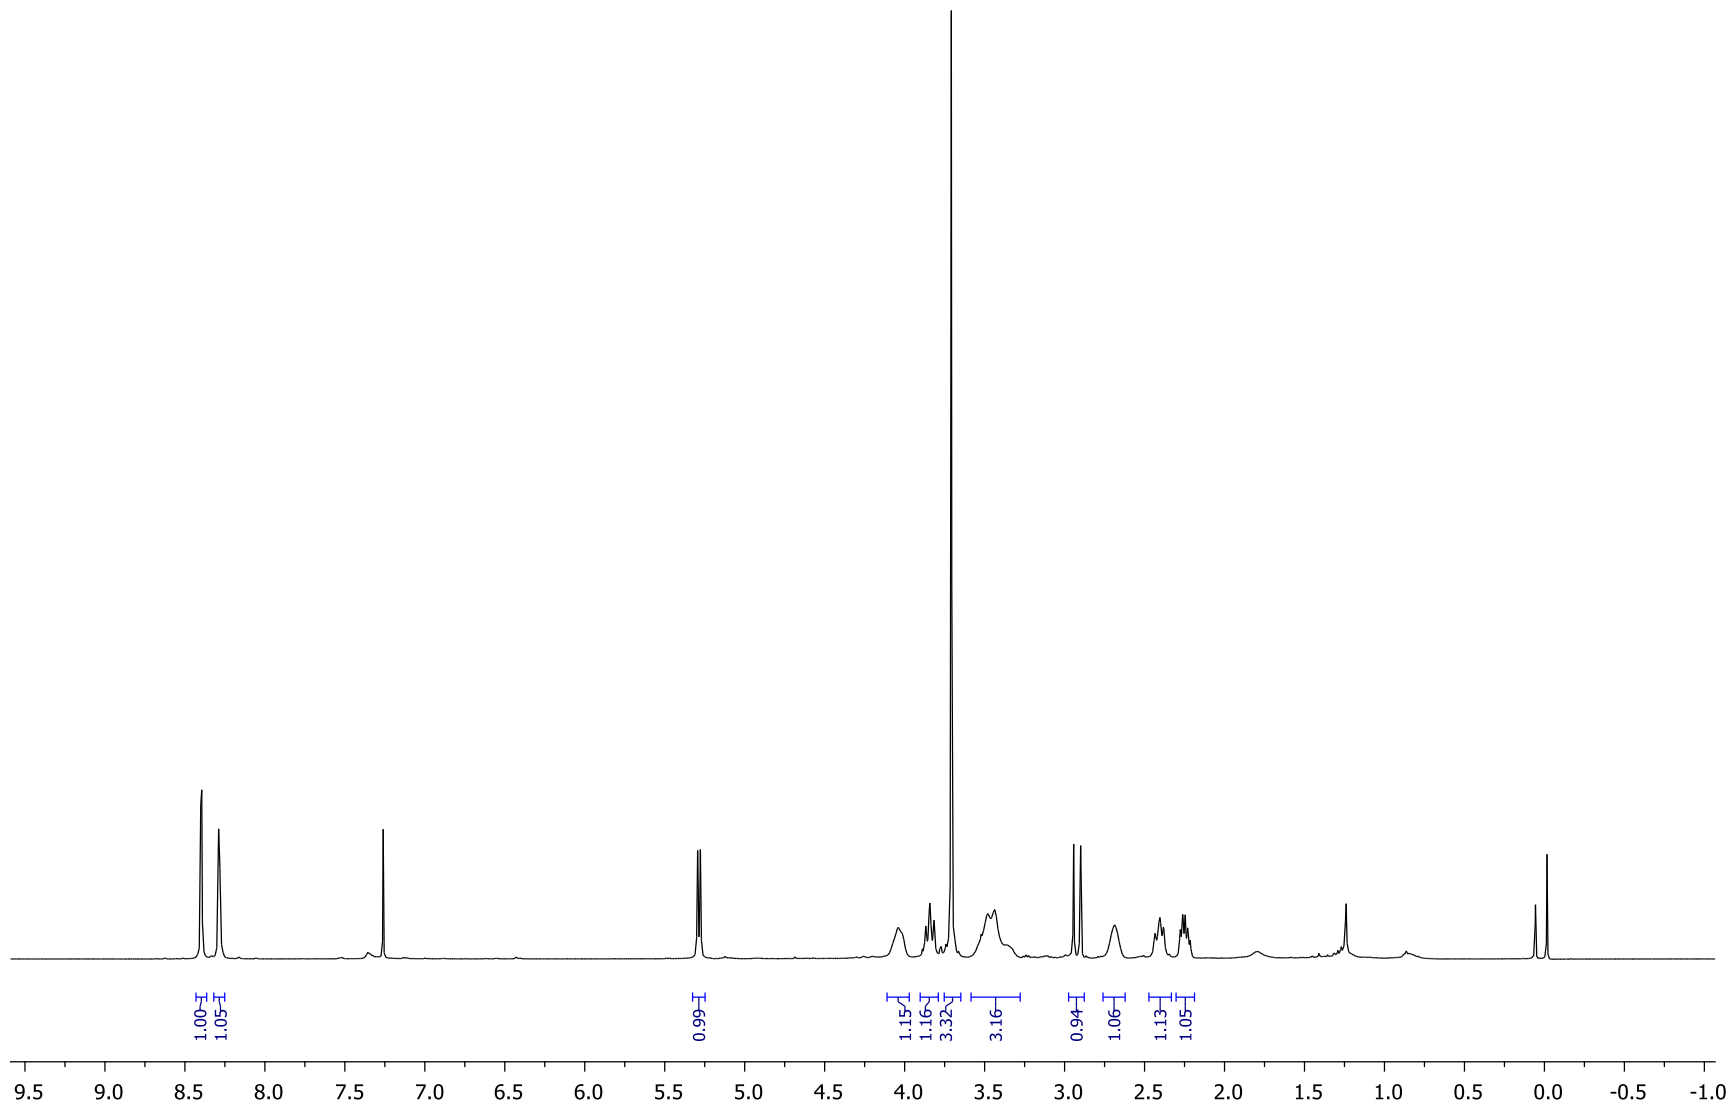

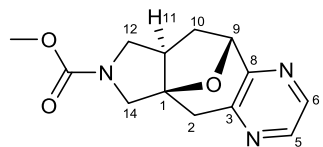

F10

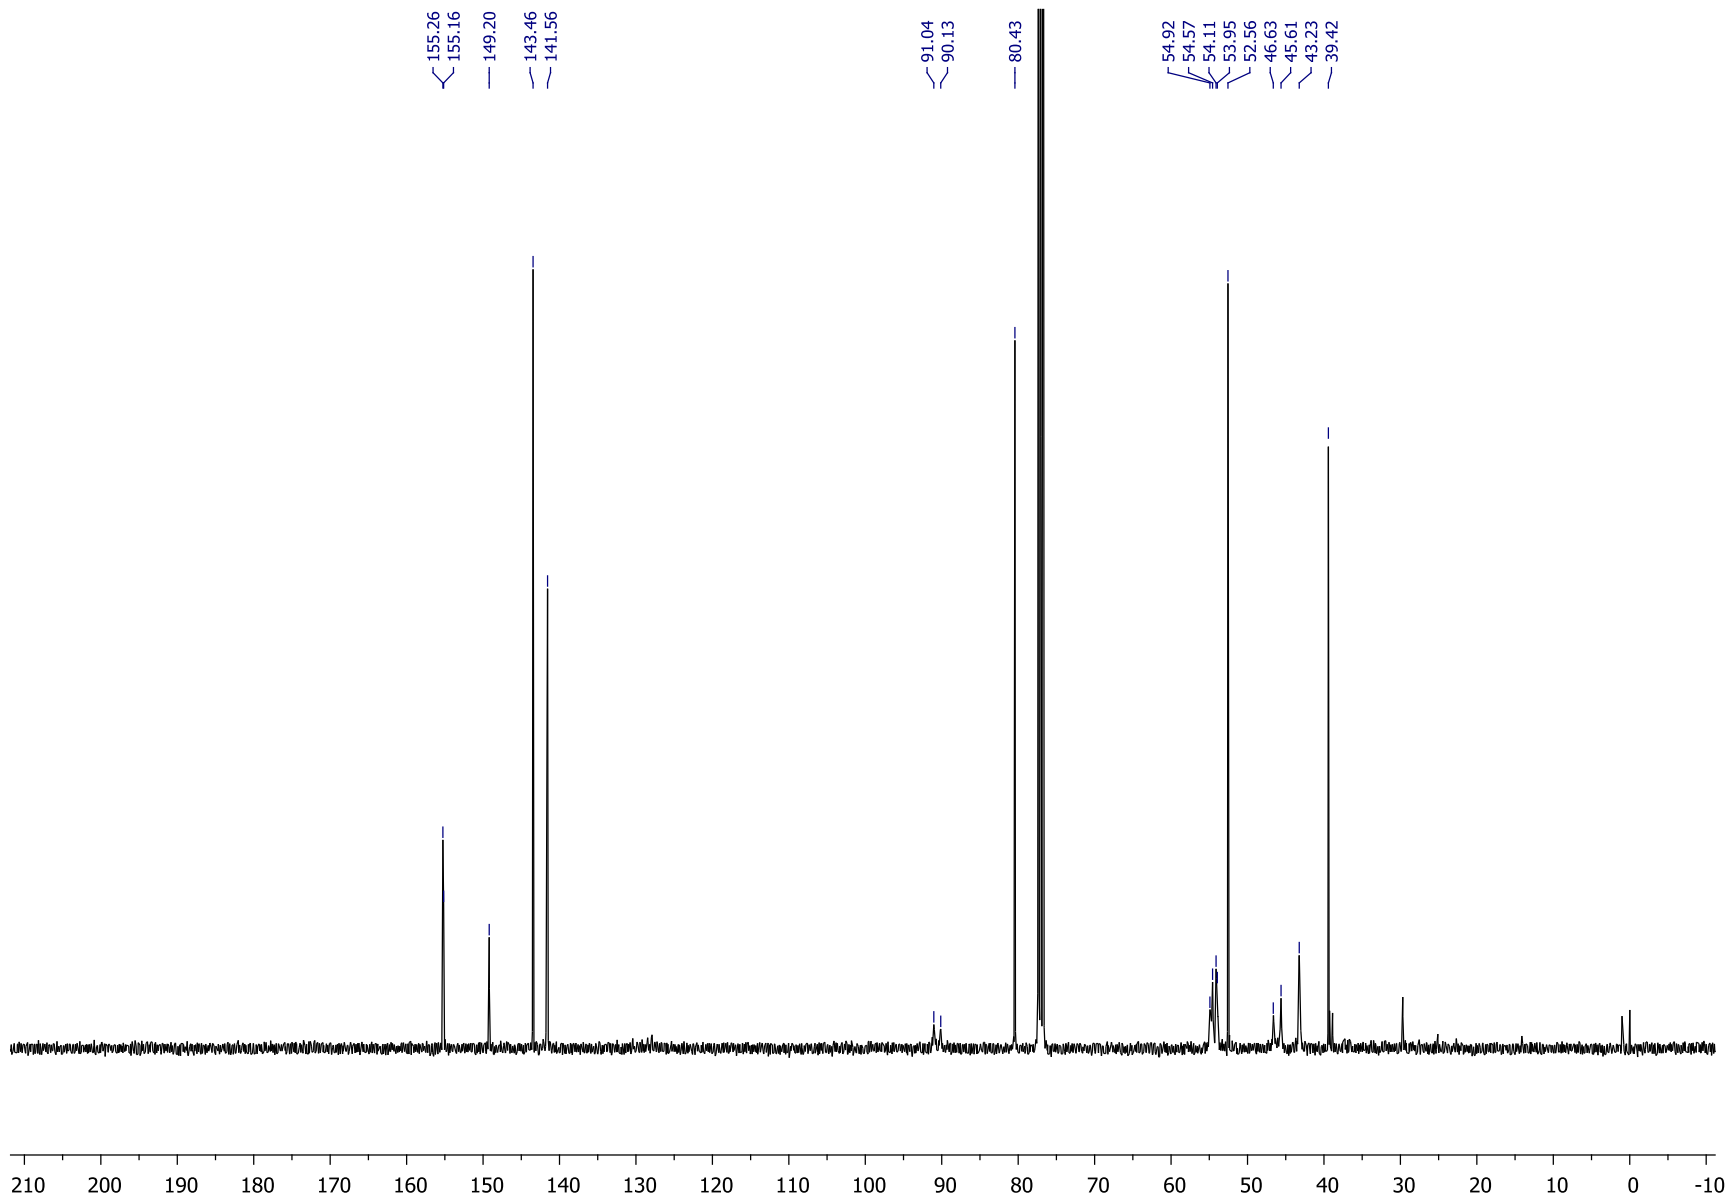



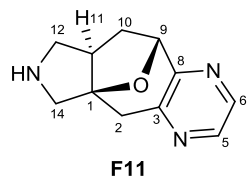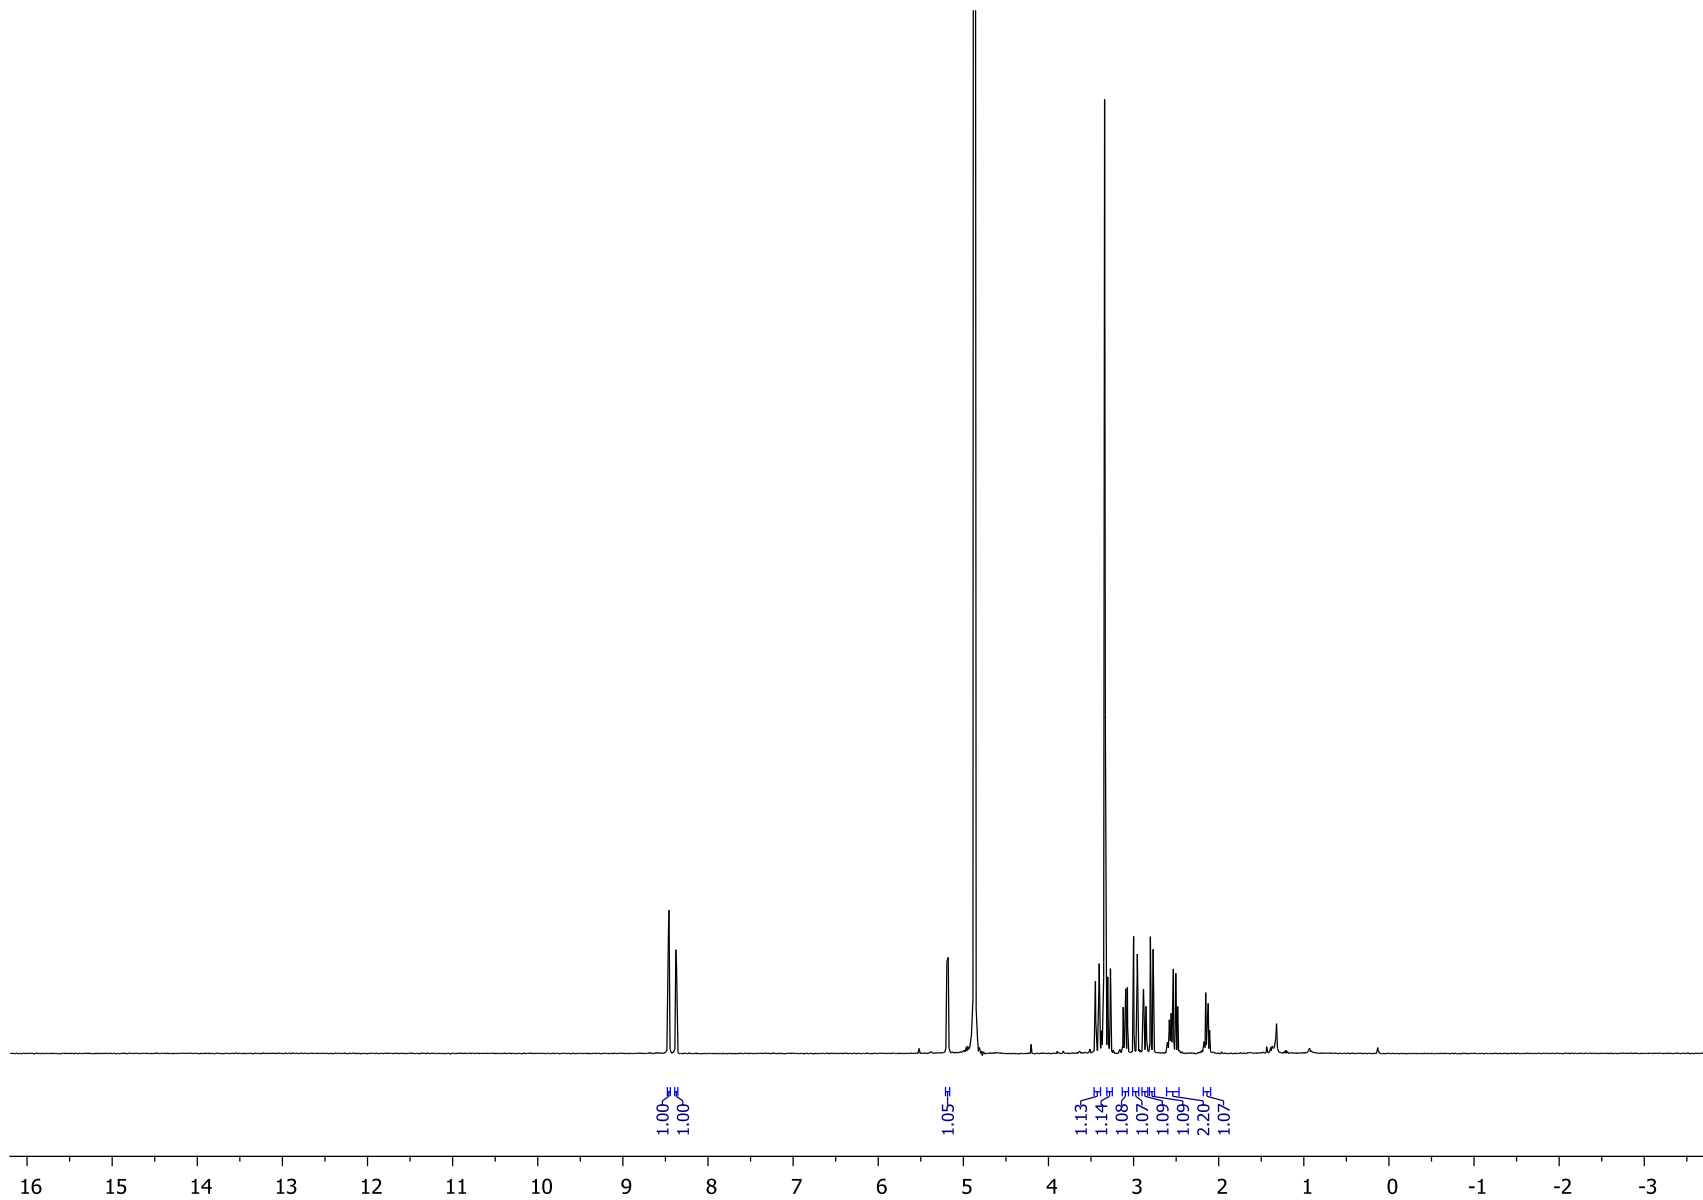

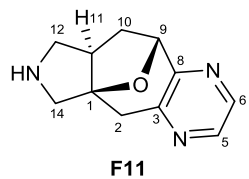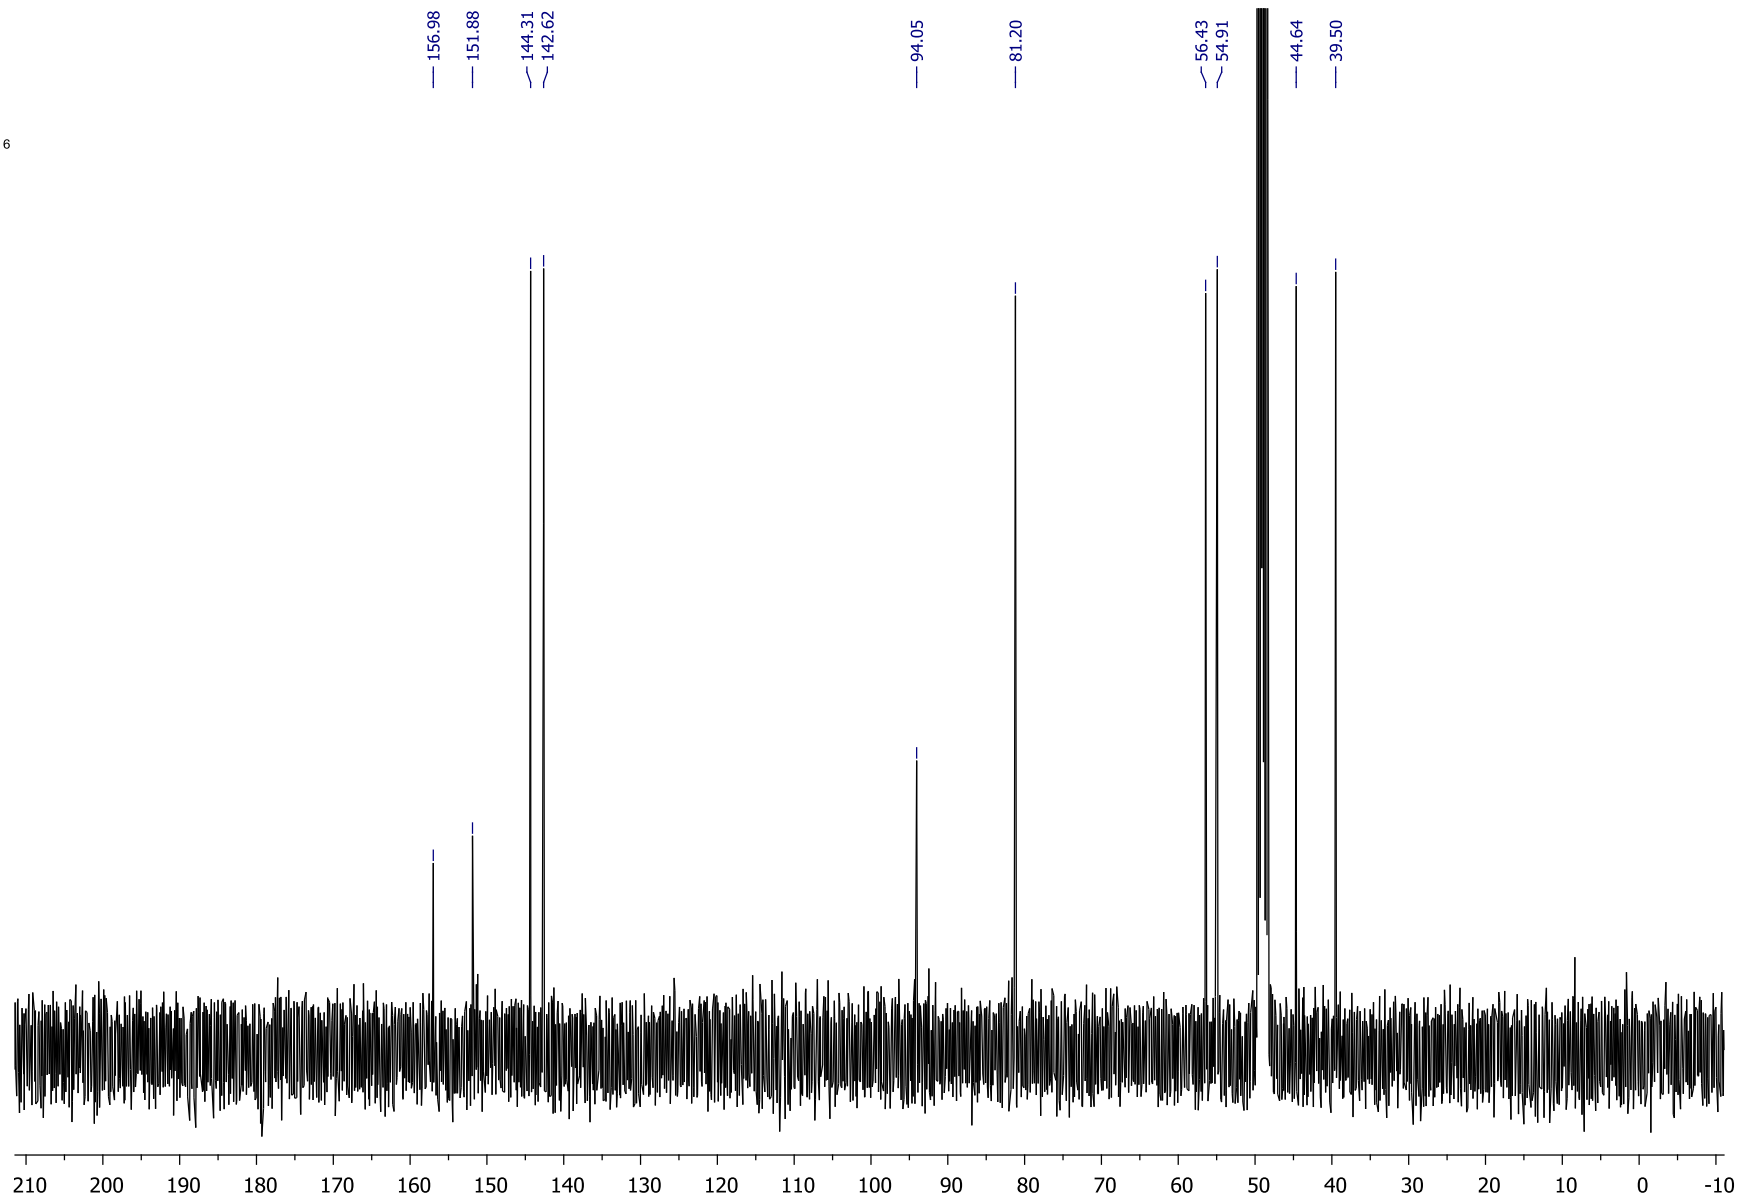

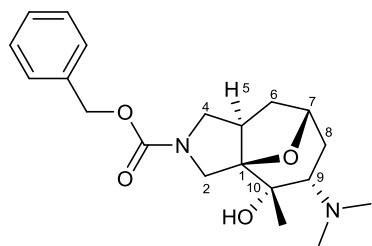

S38

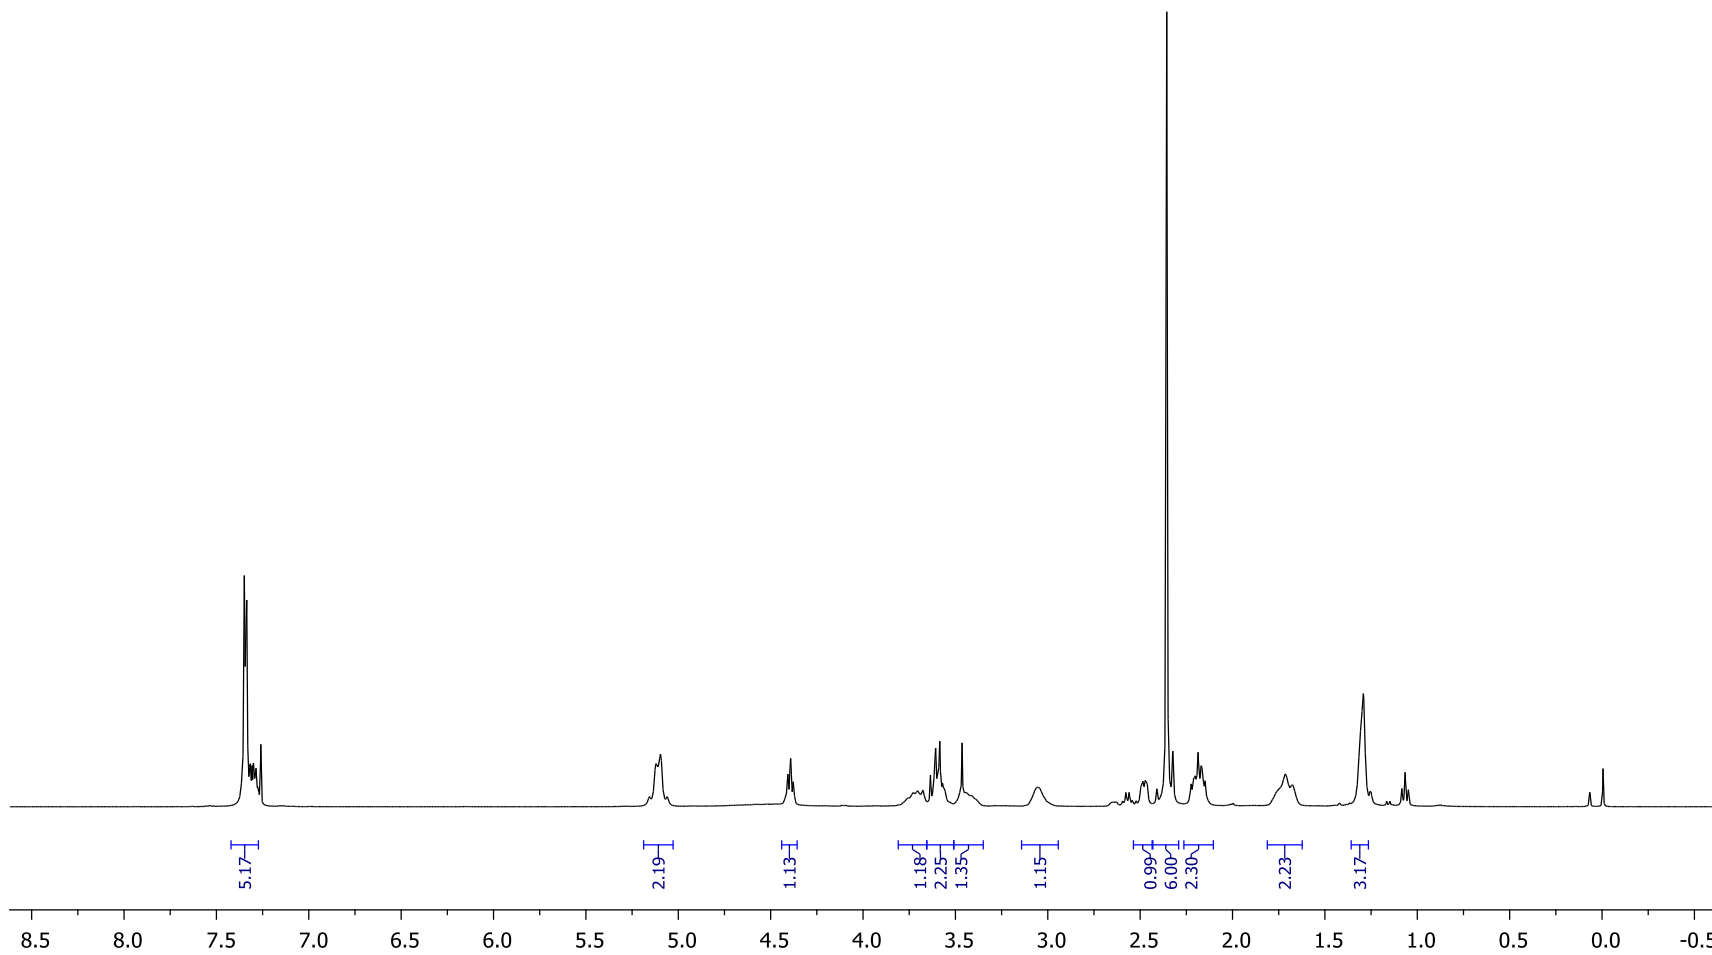

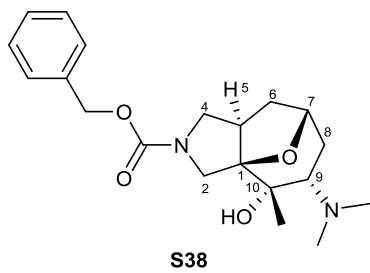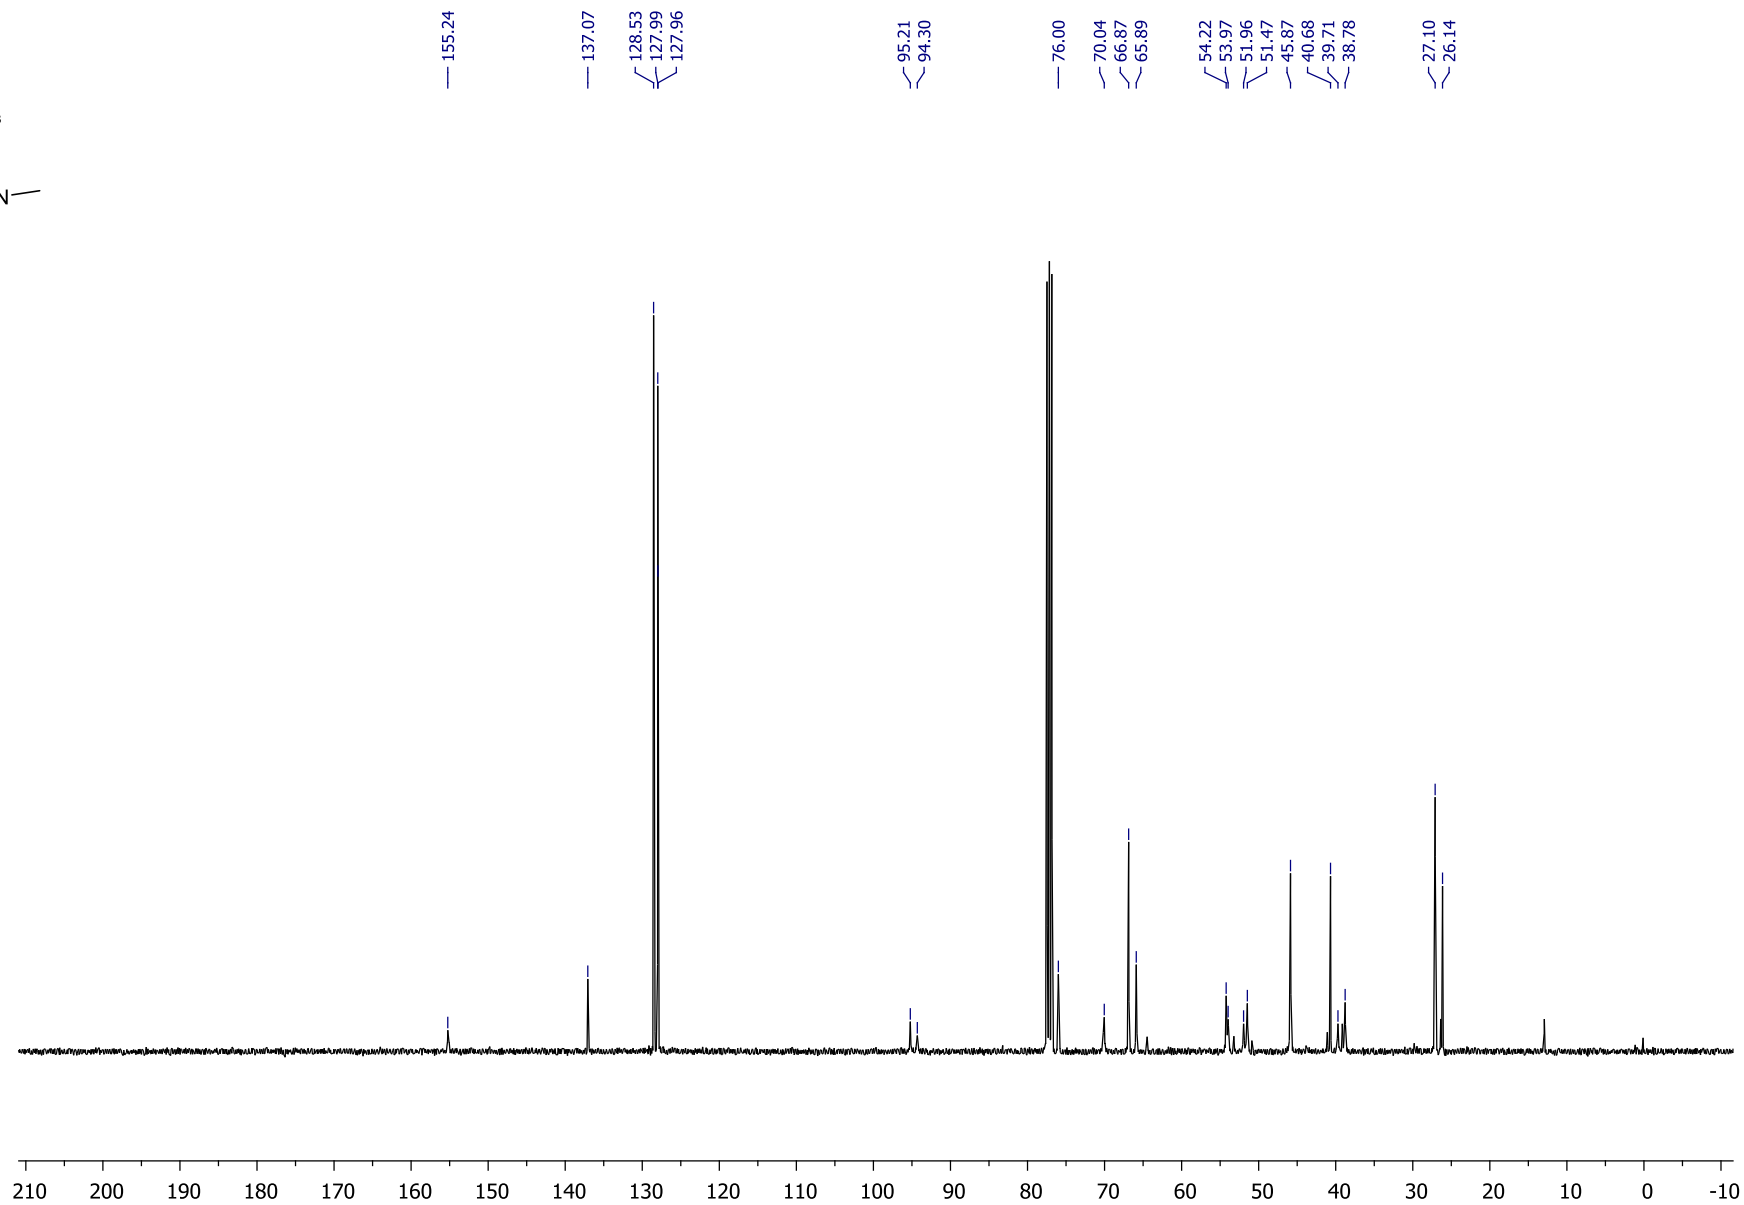

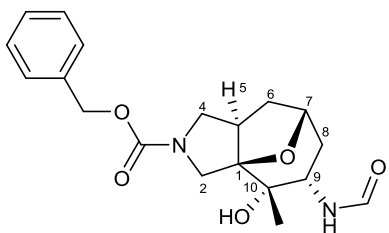

S39

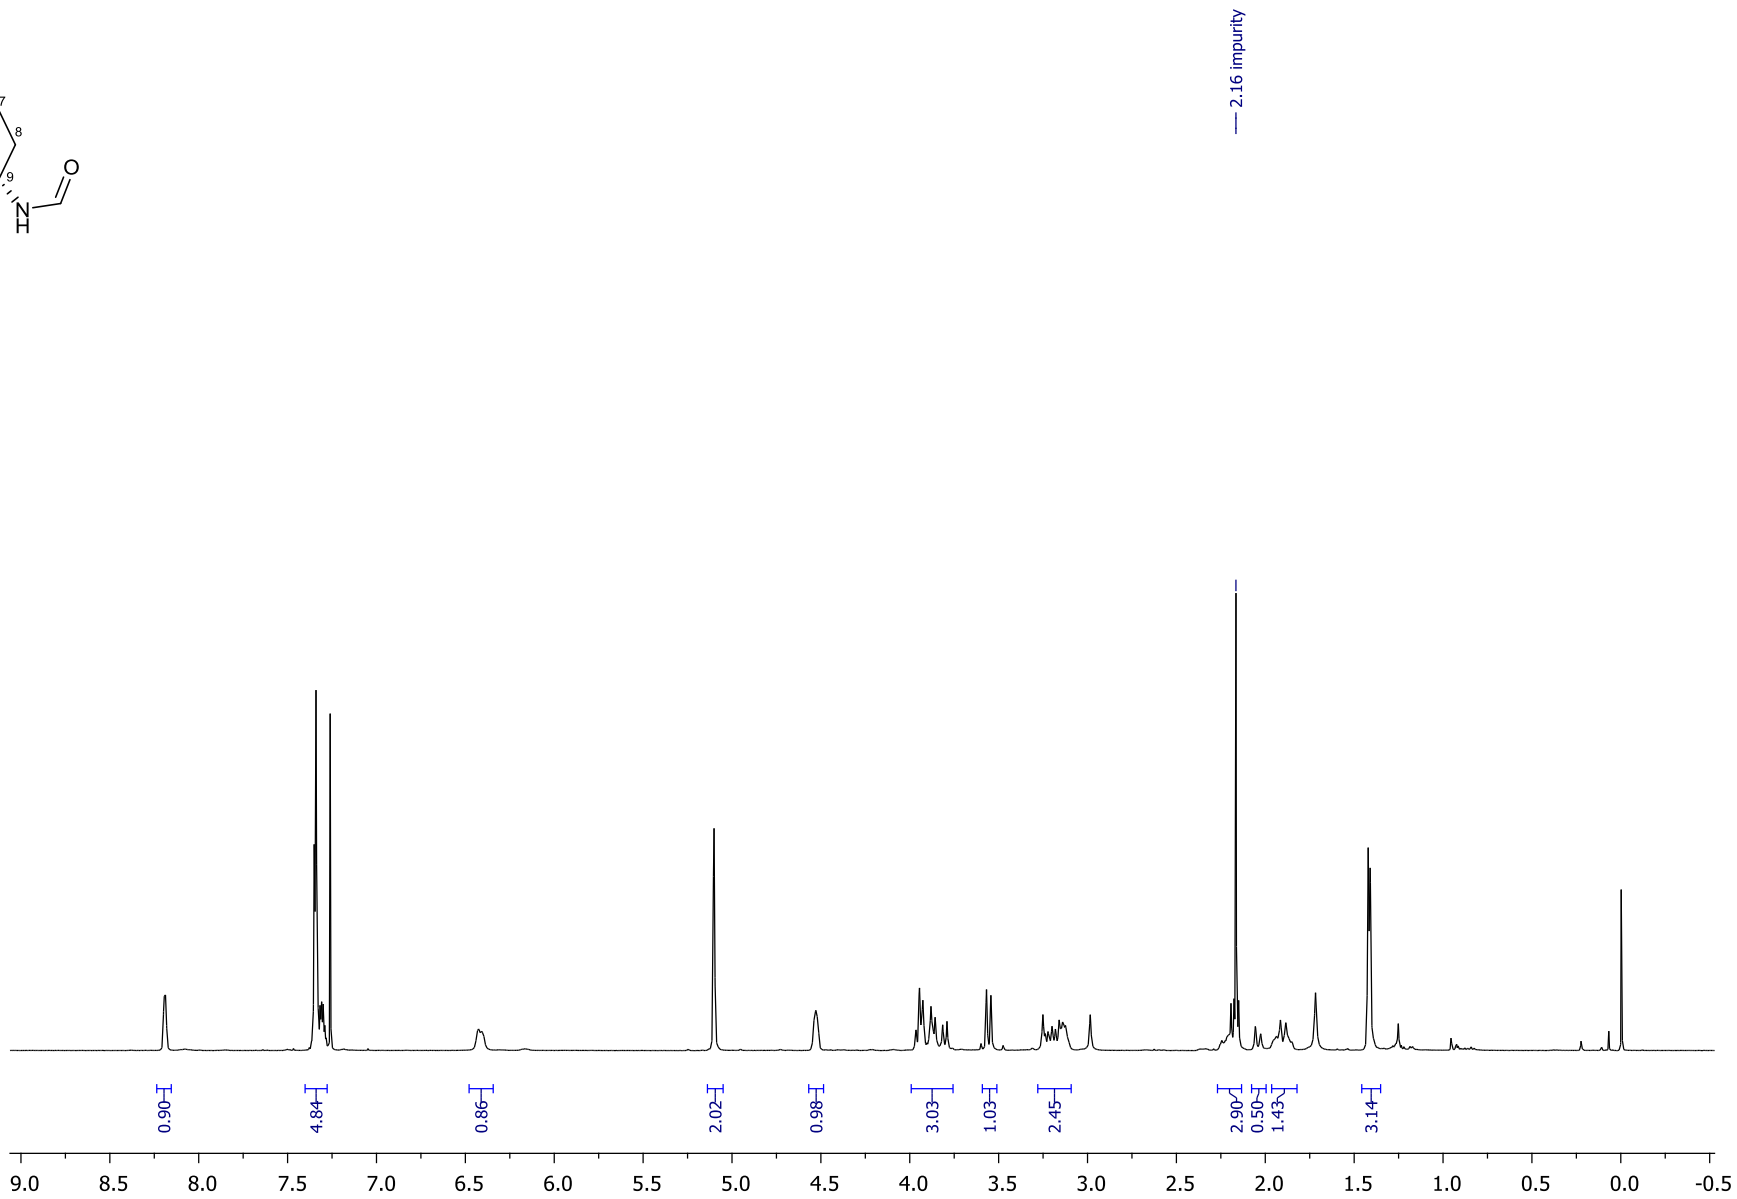

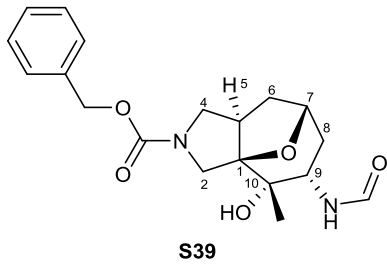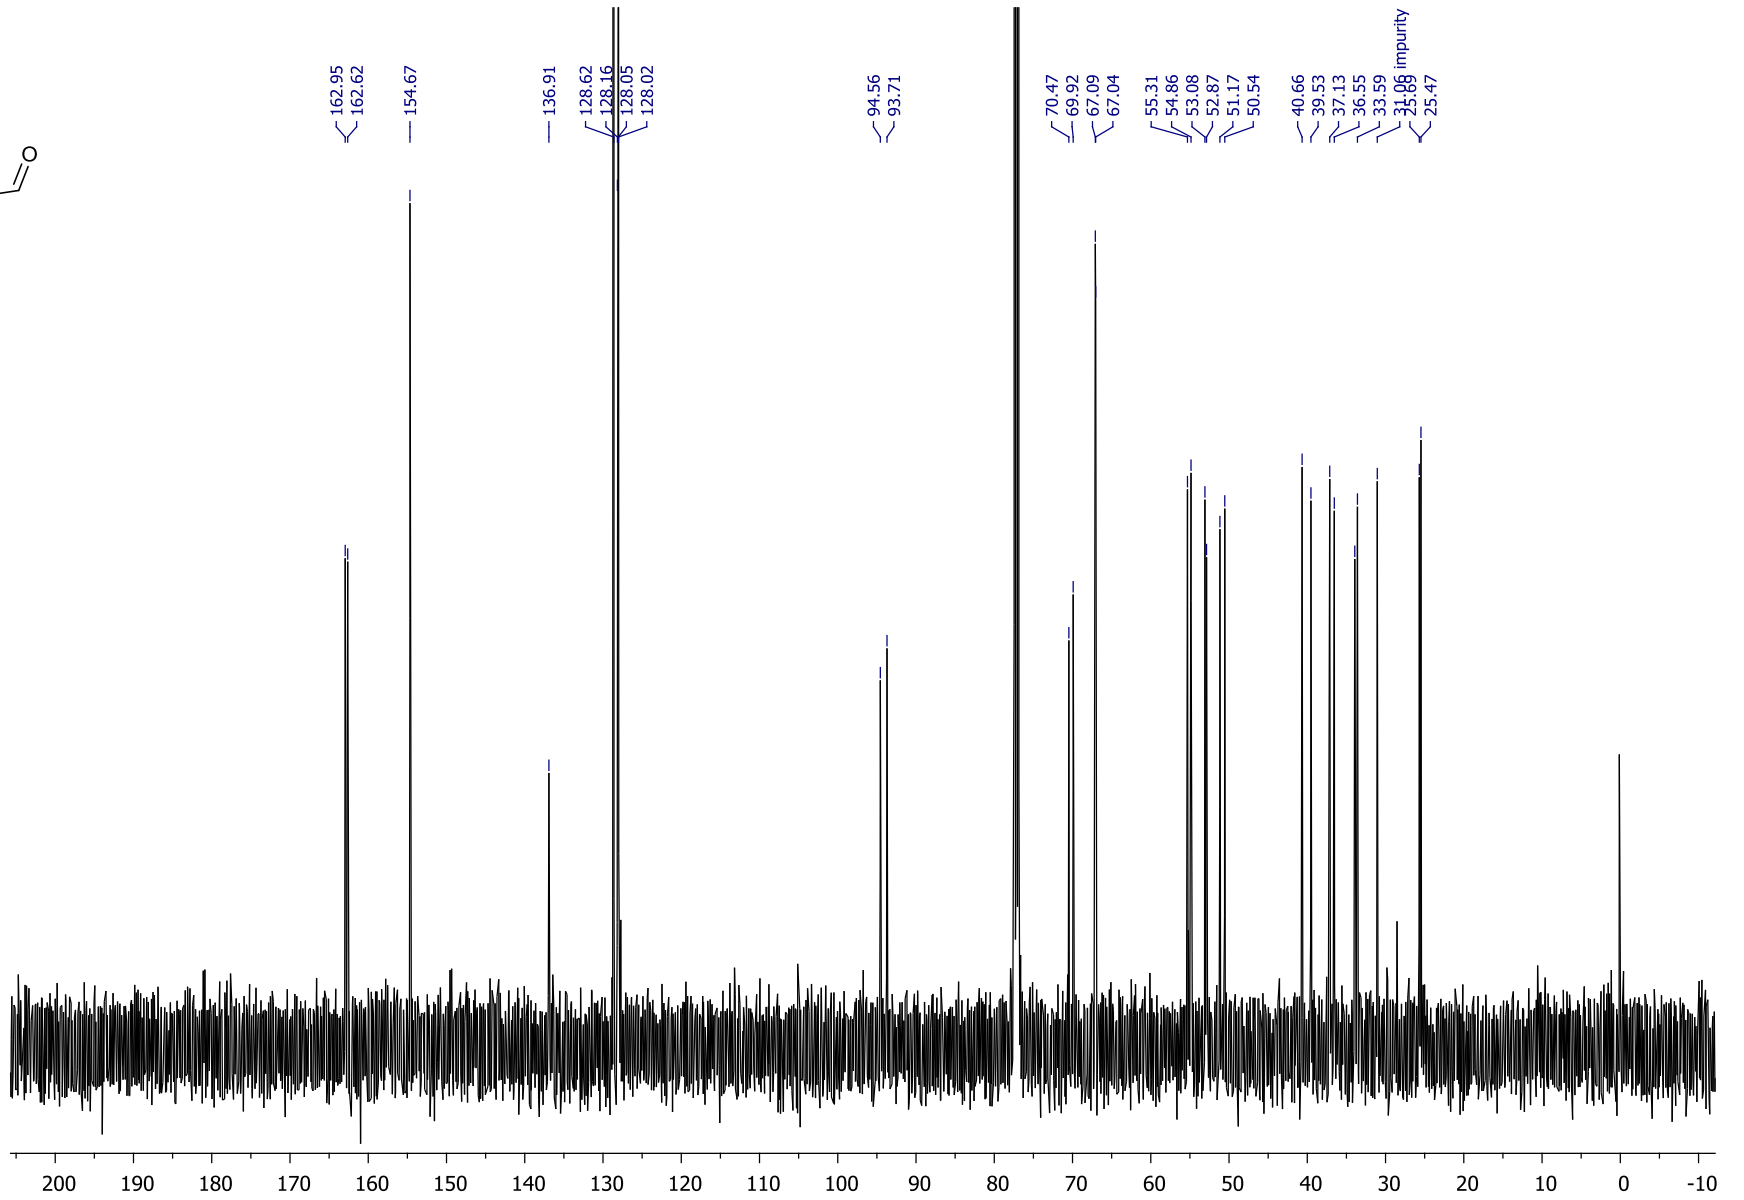

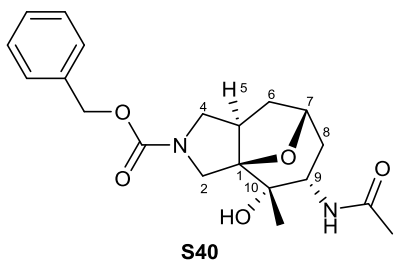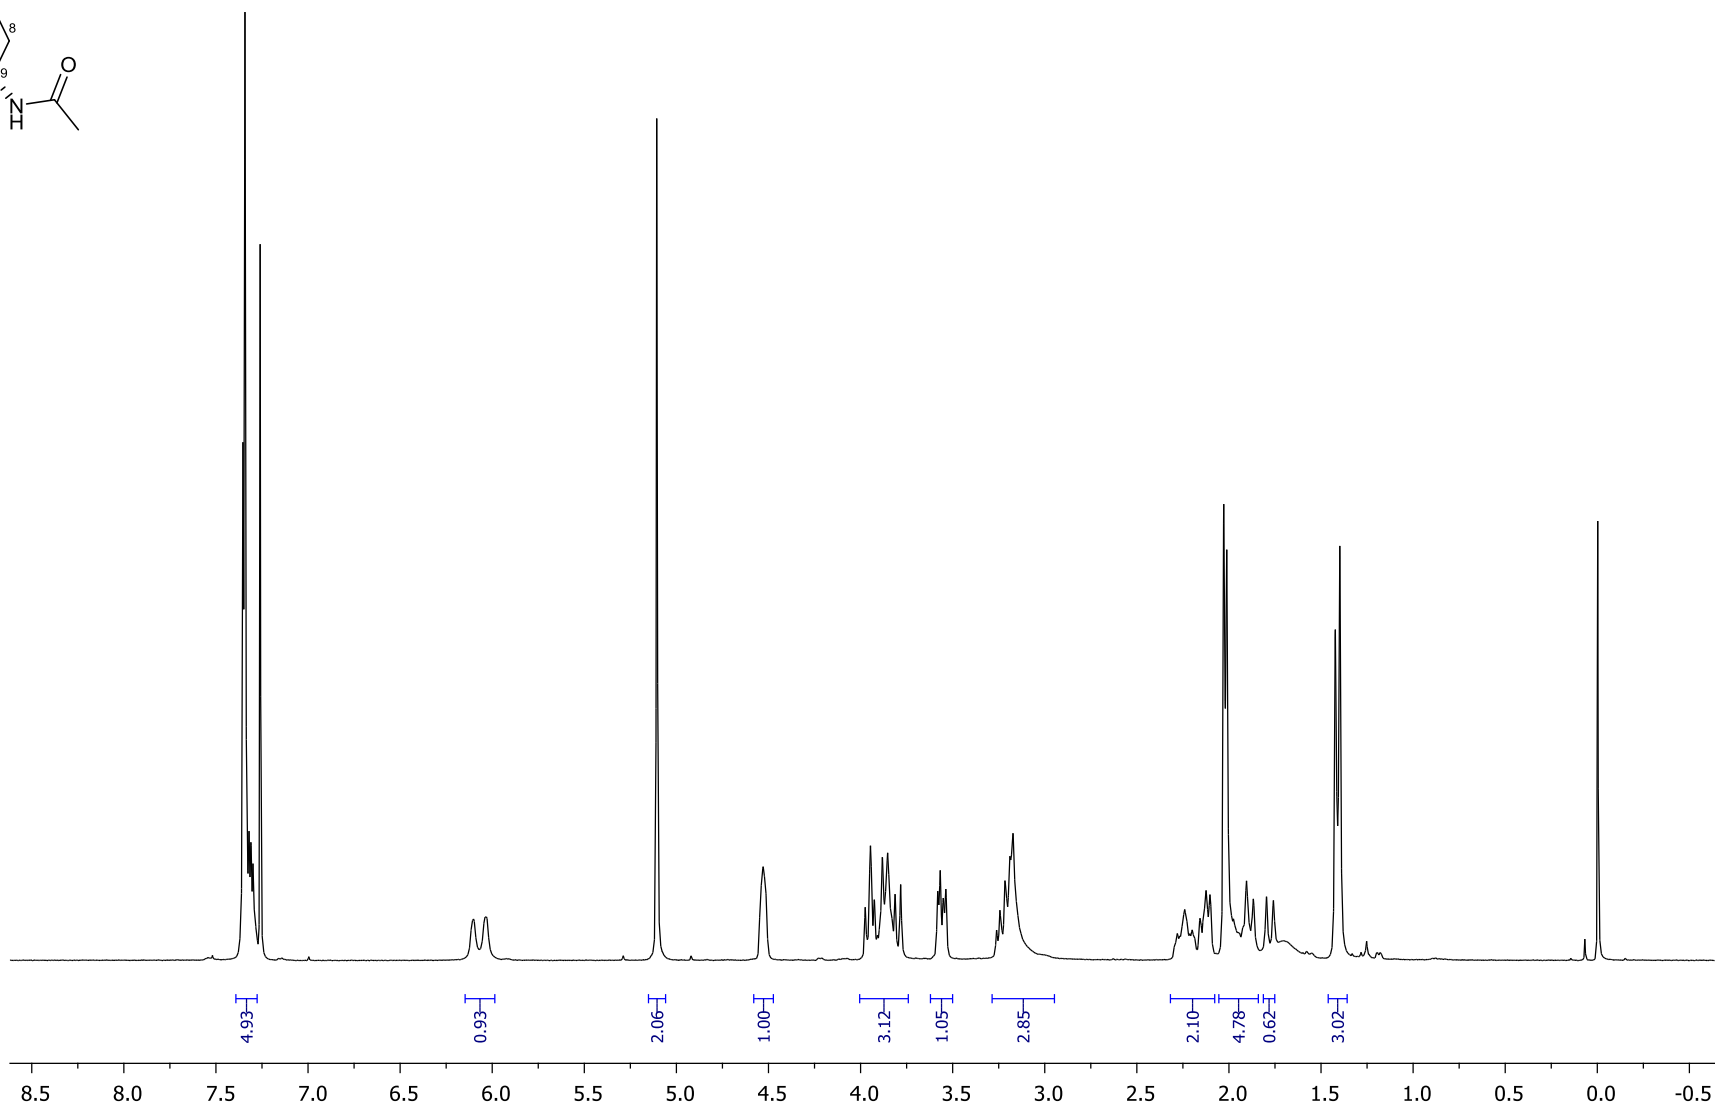

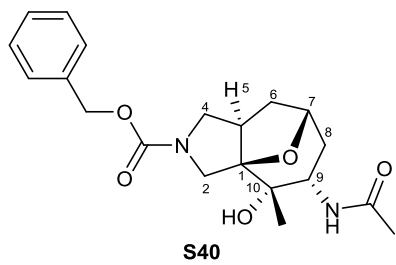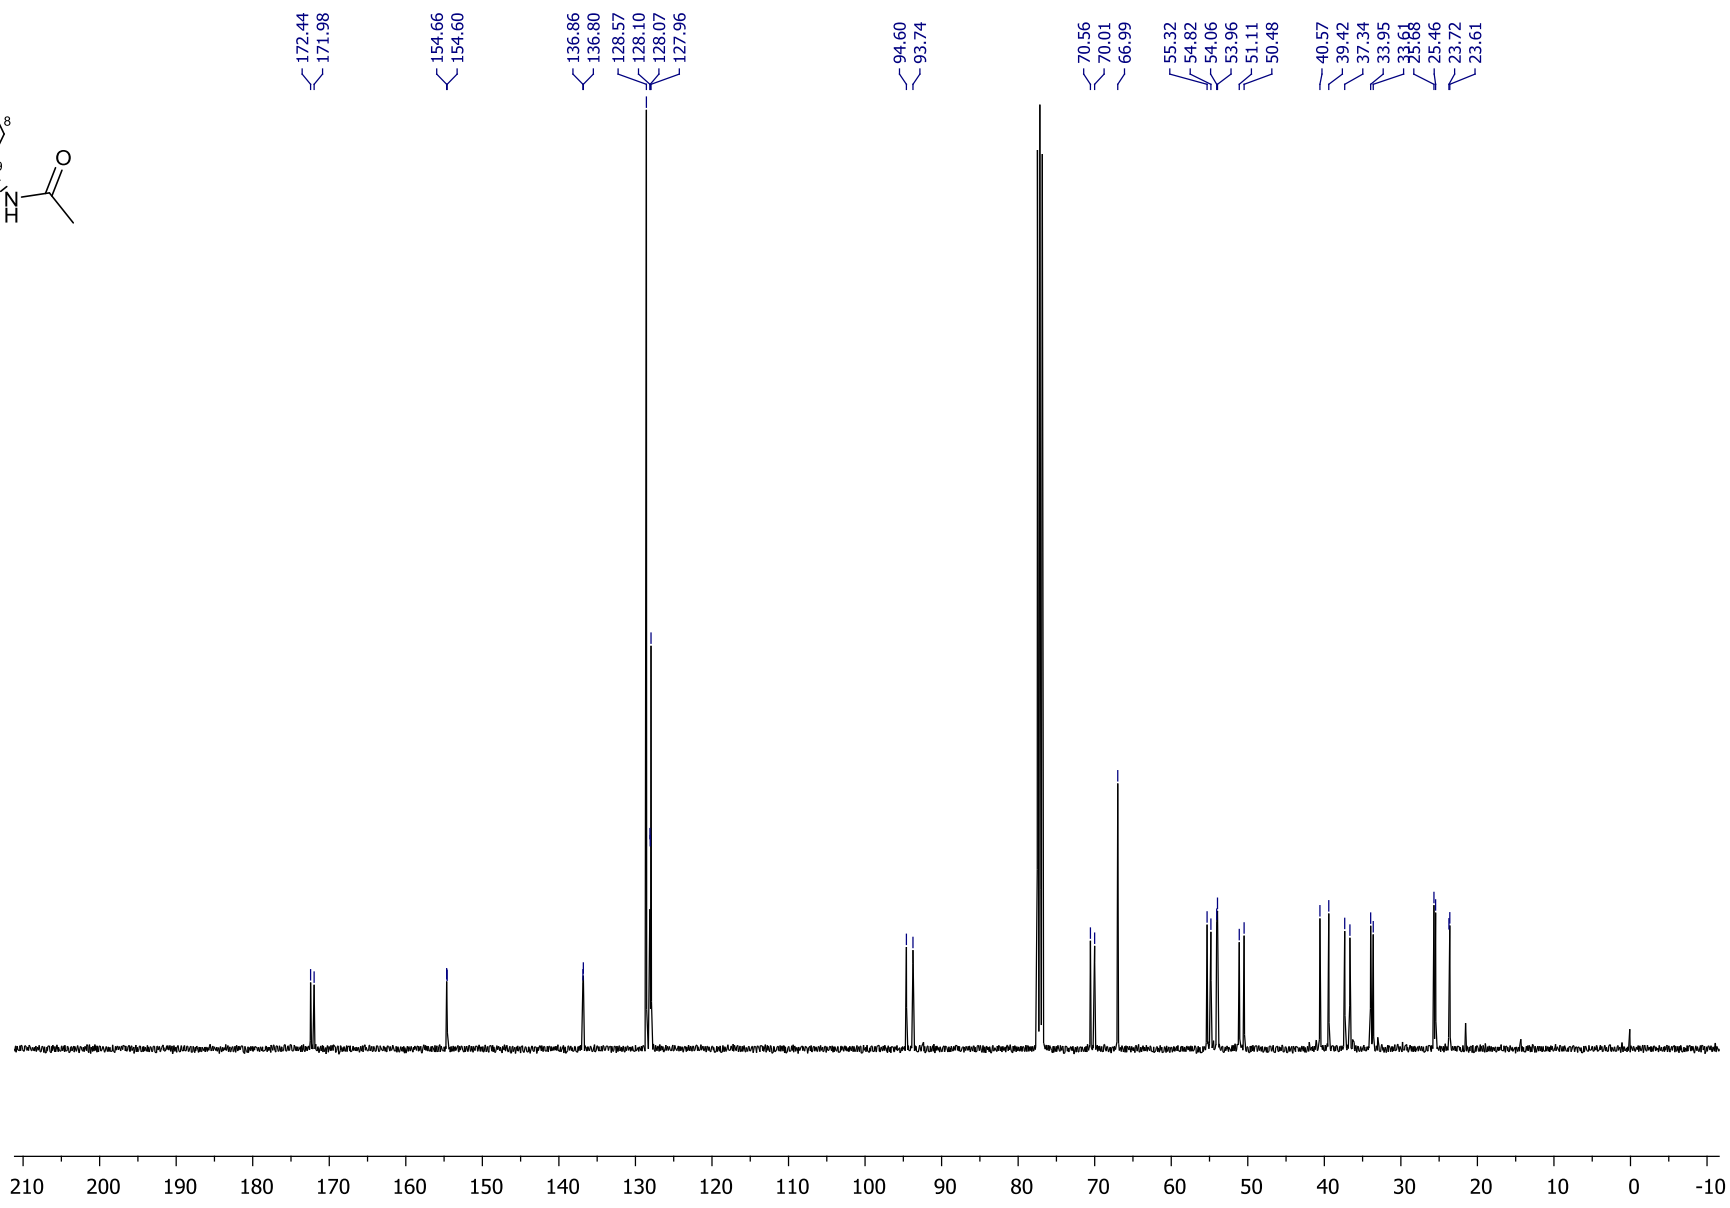



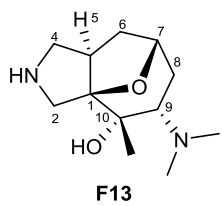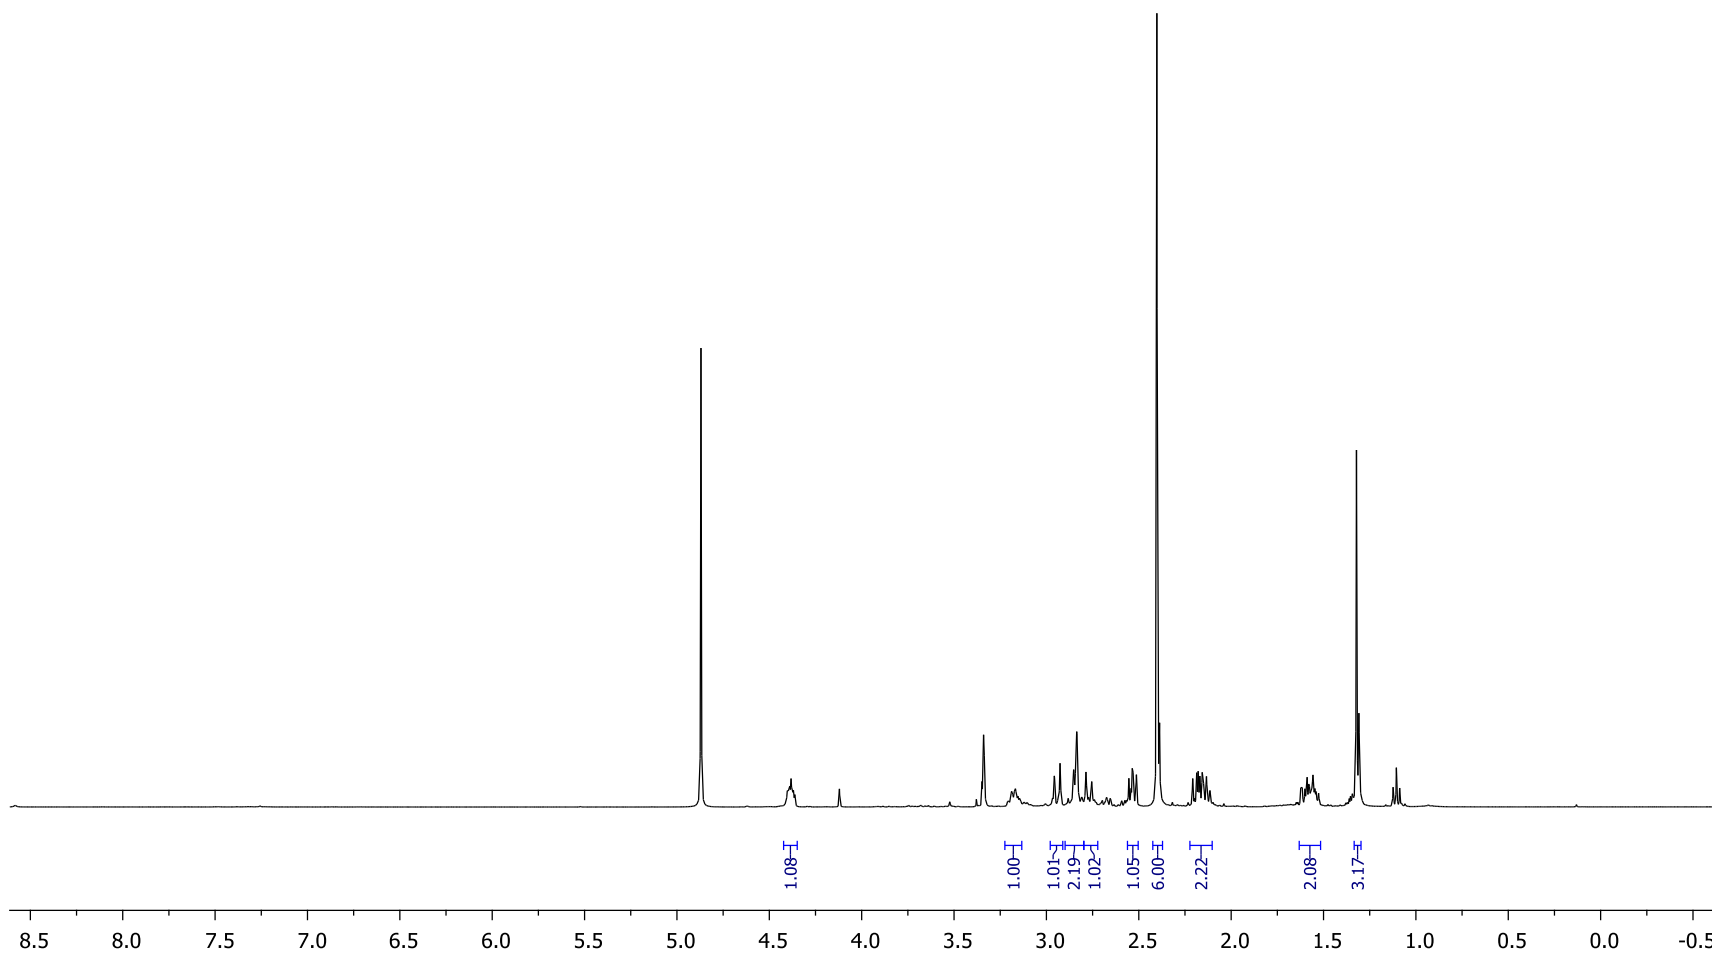

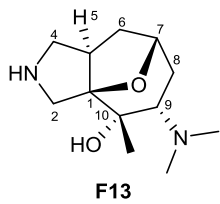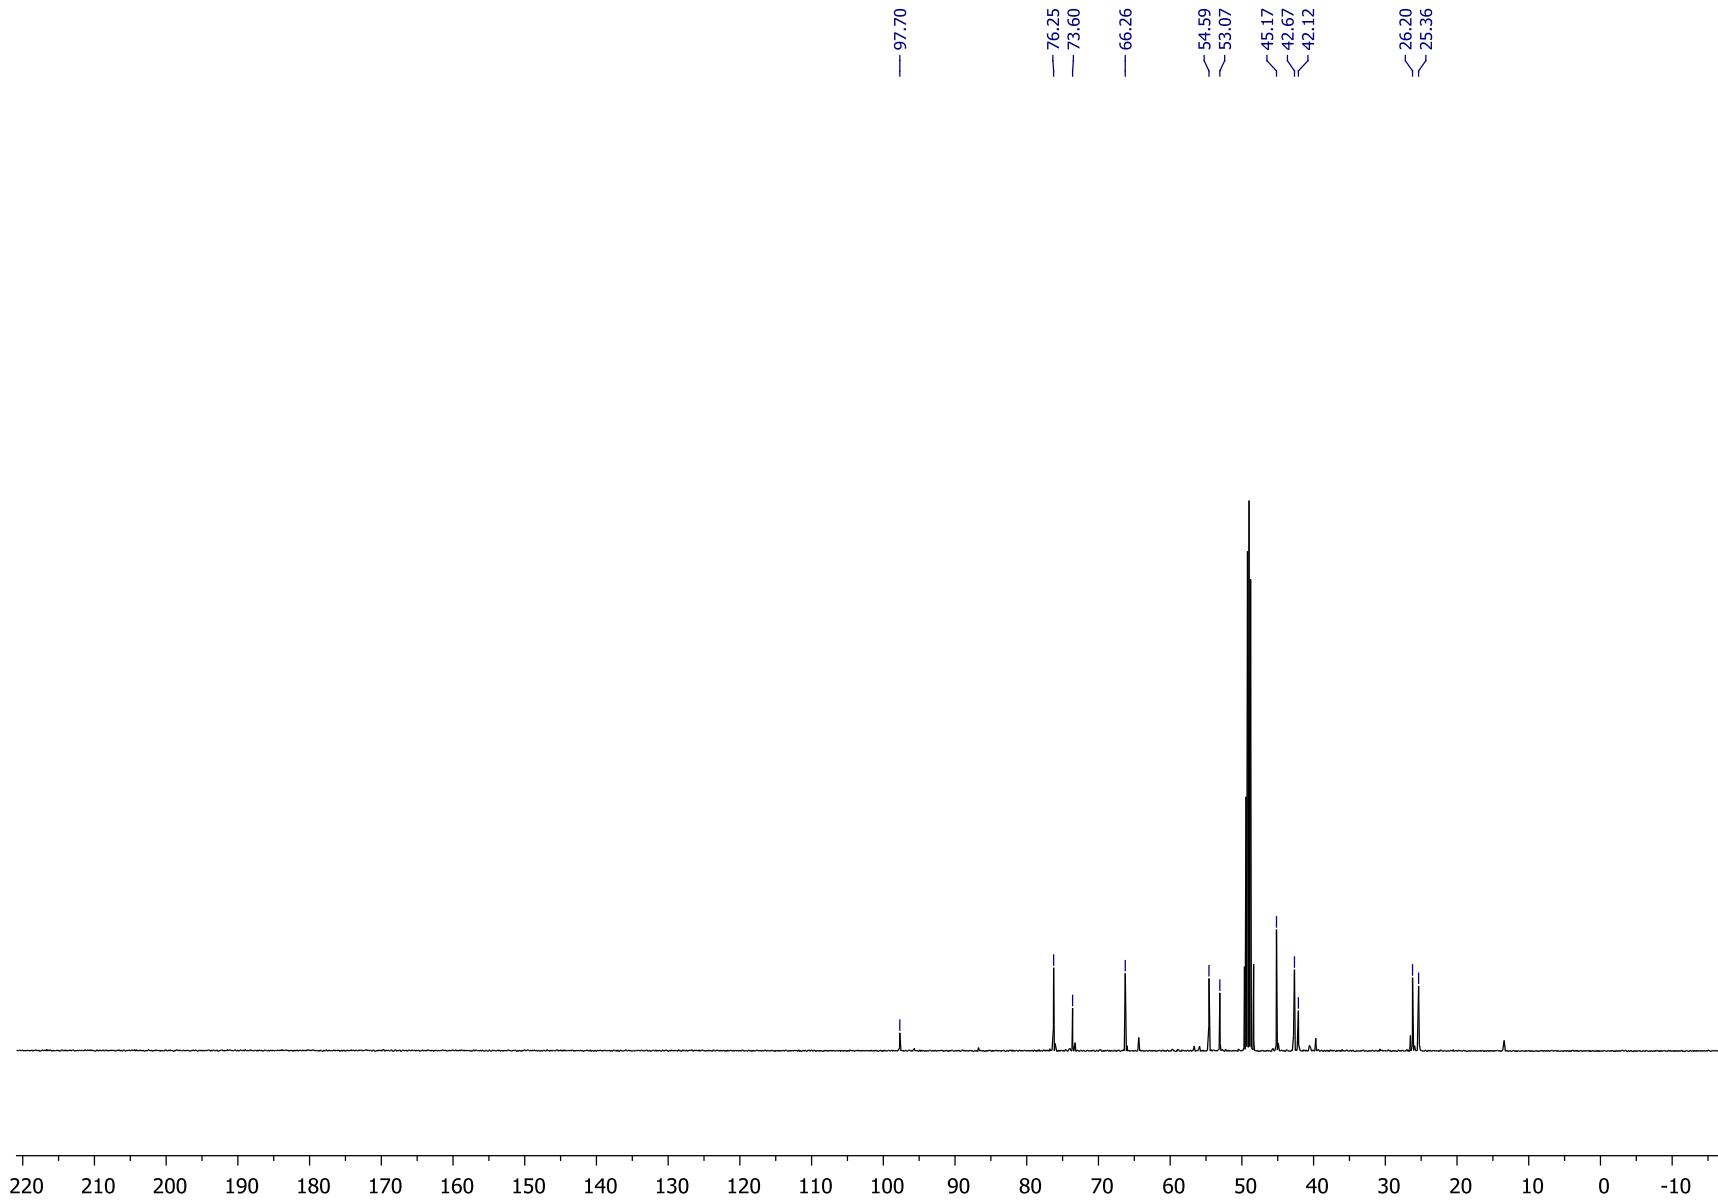

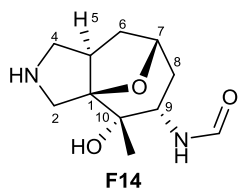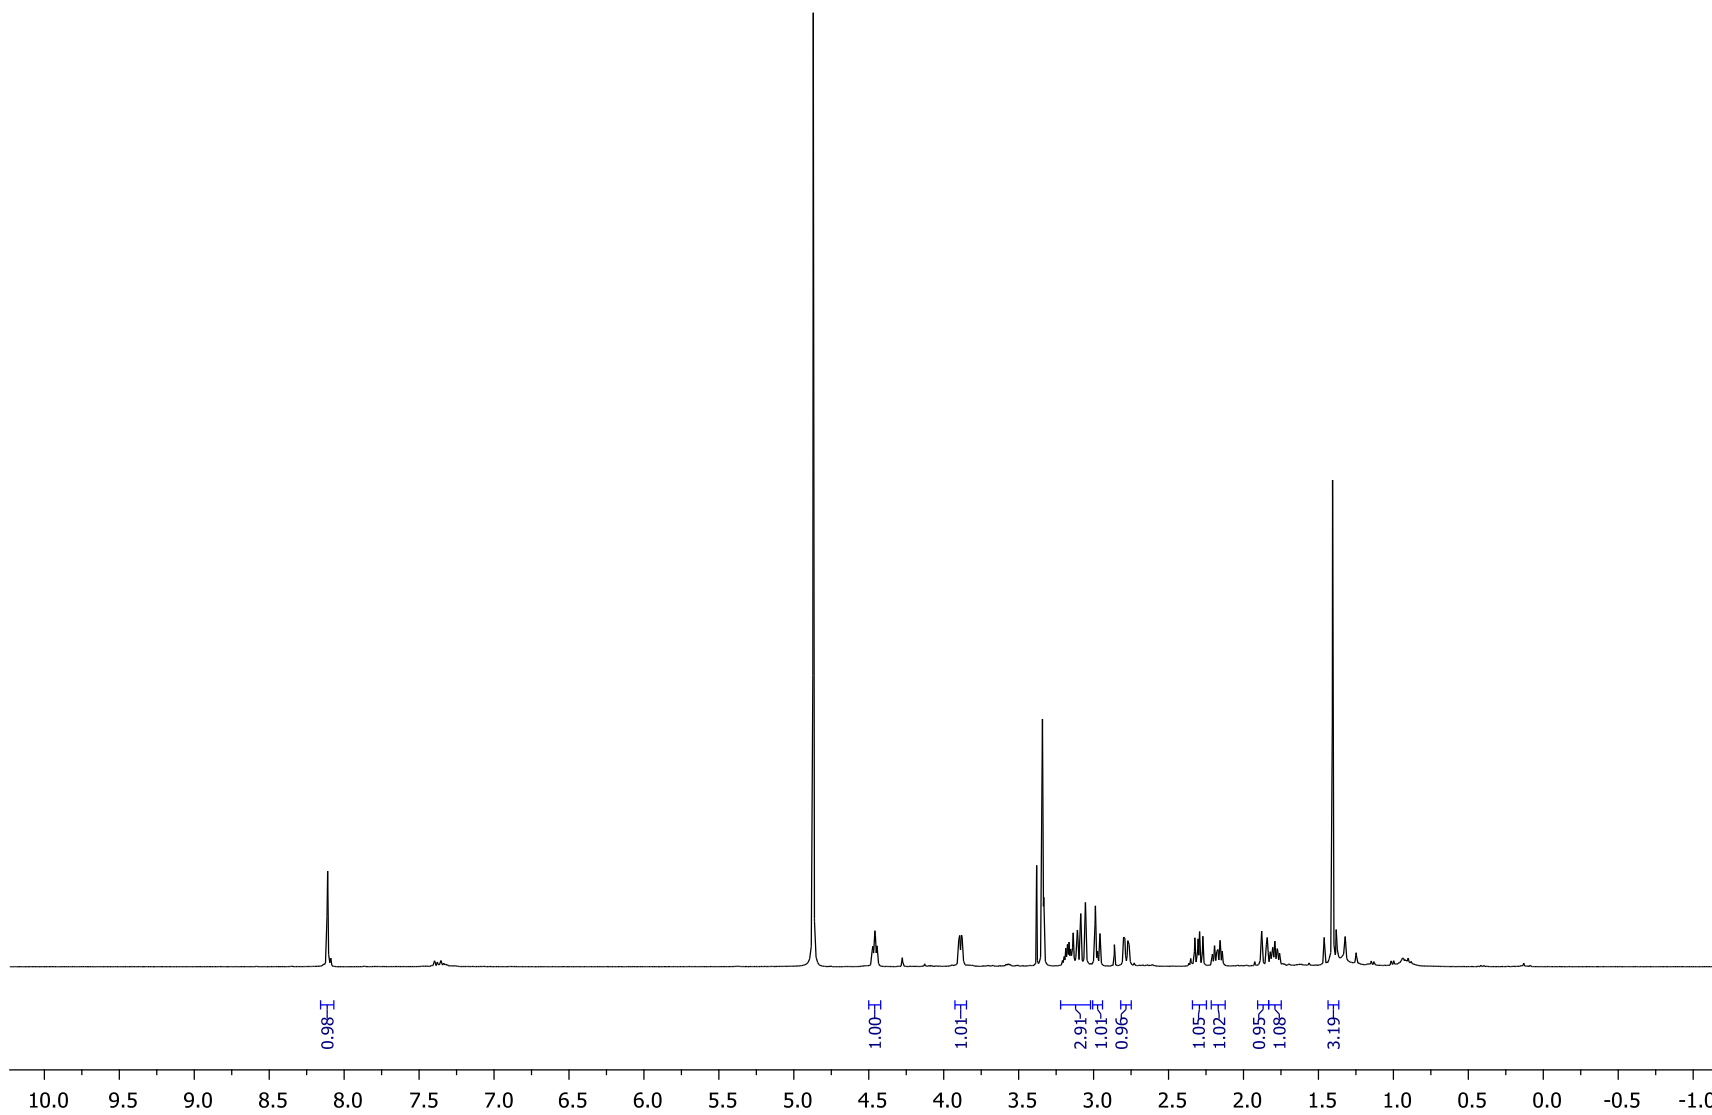

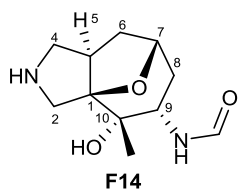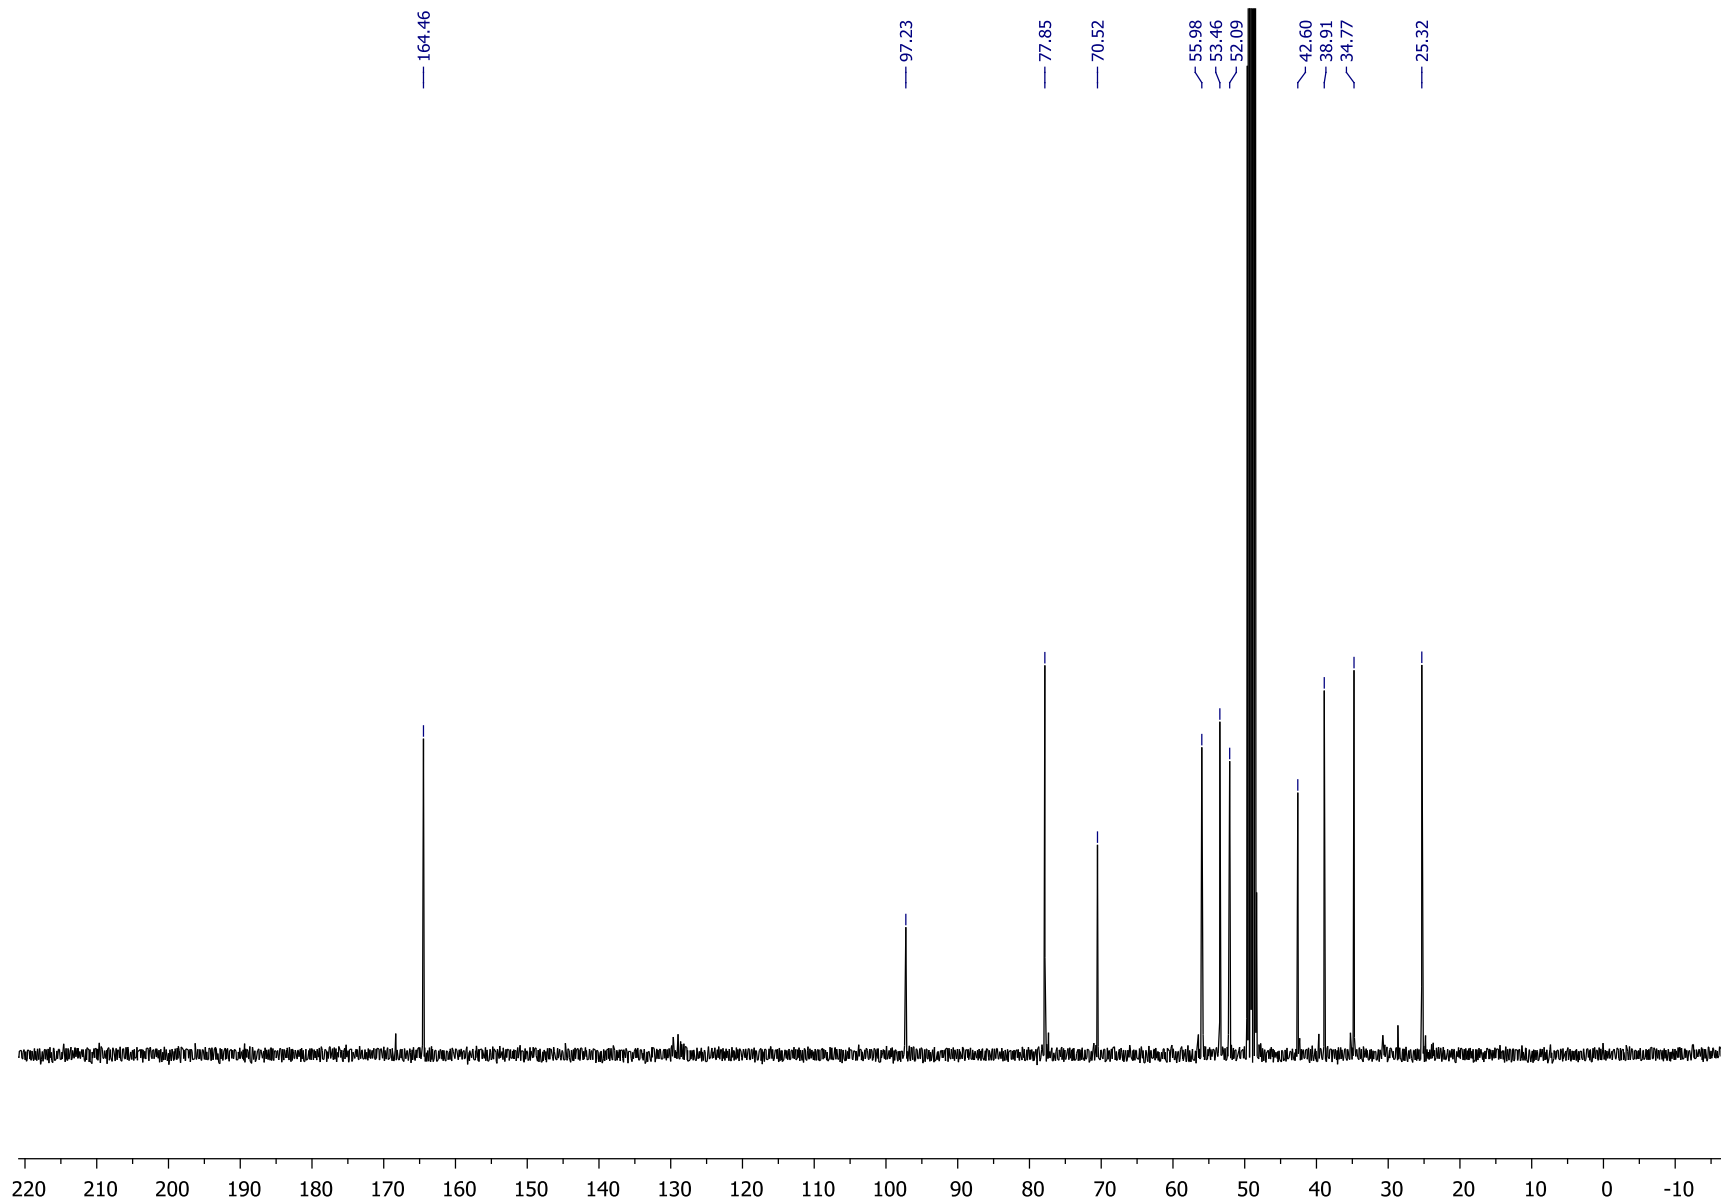

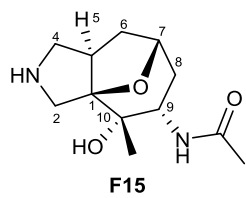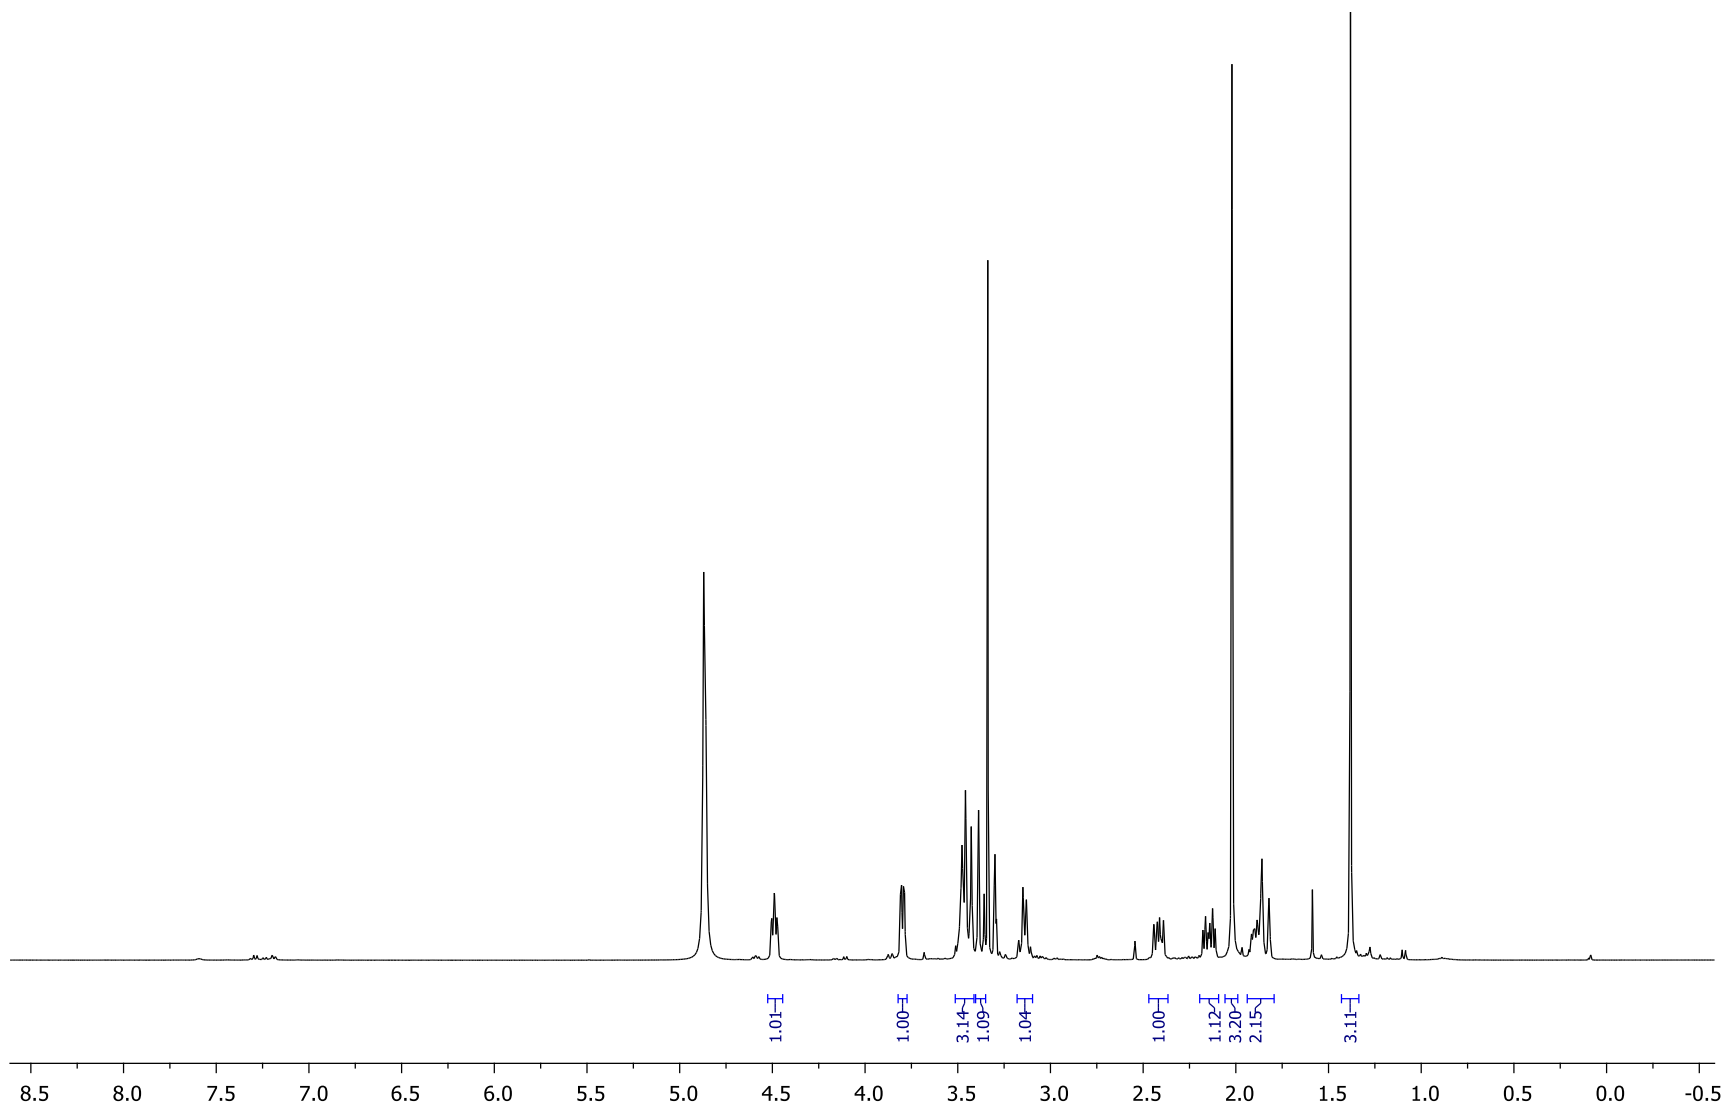

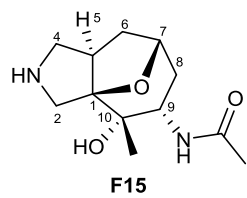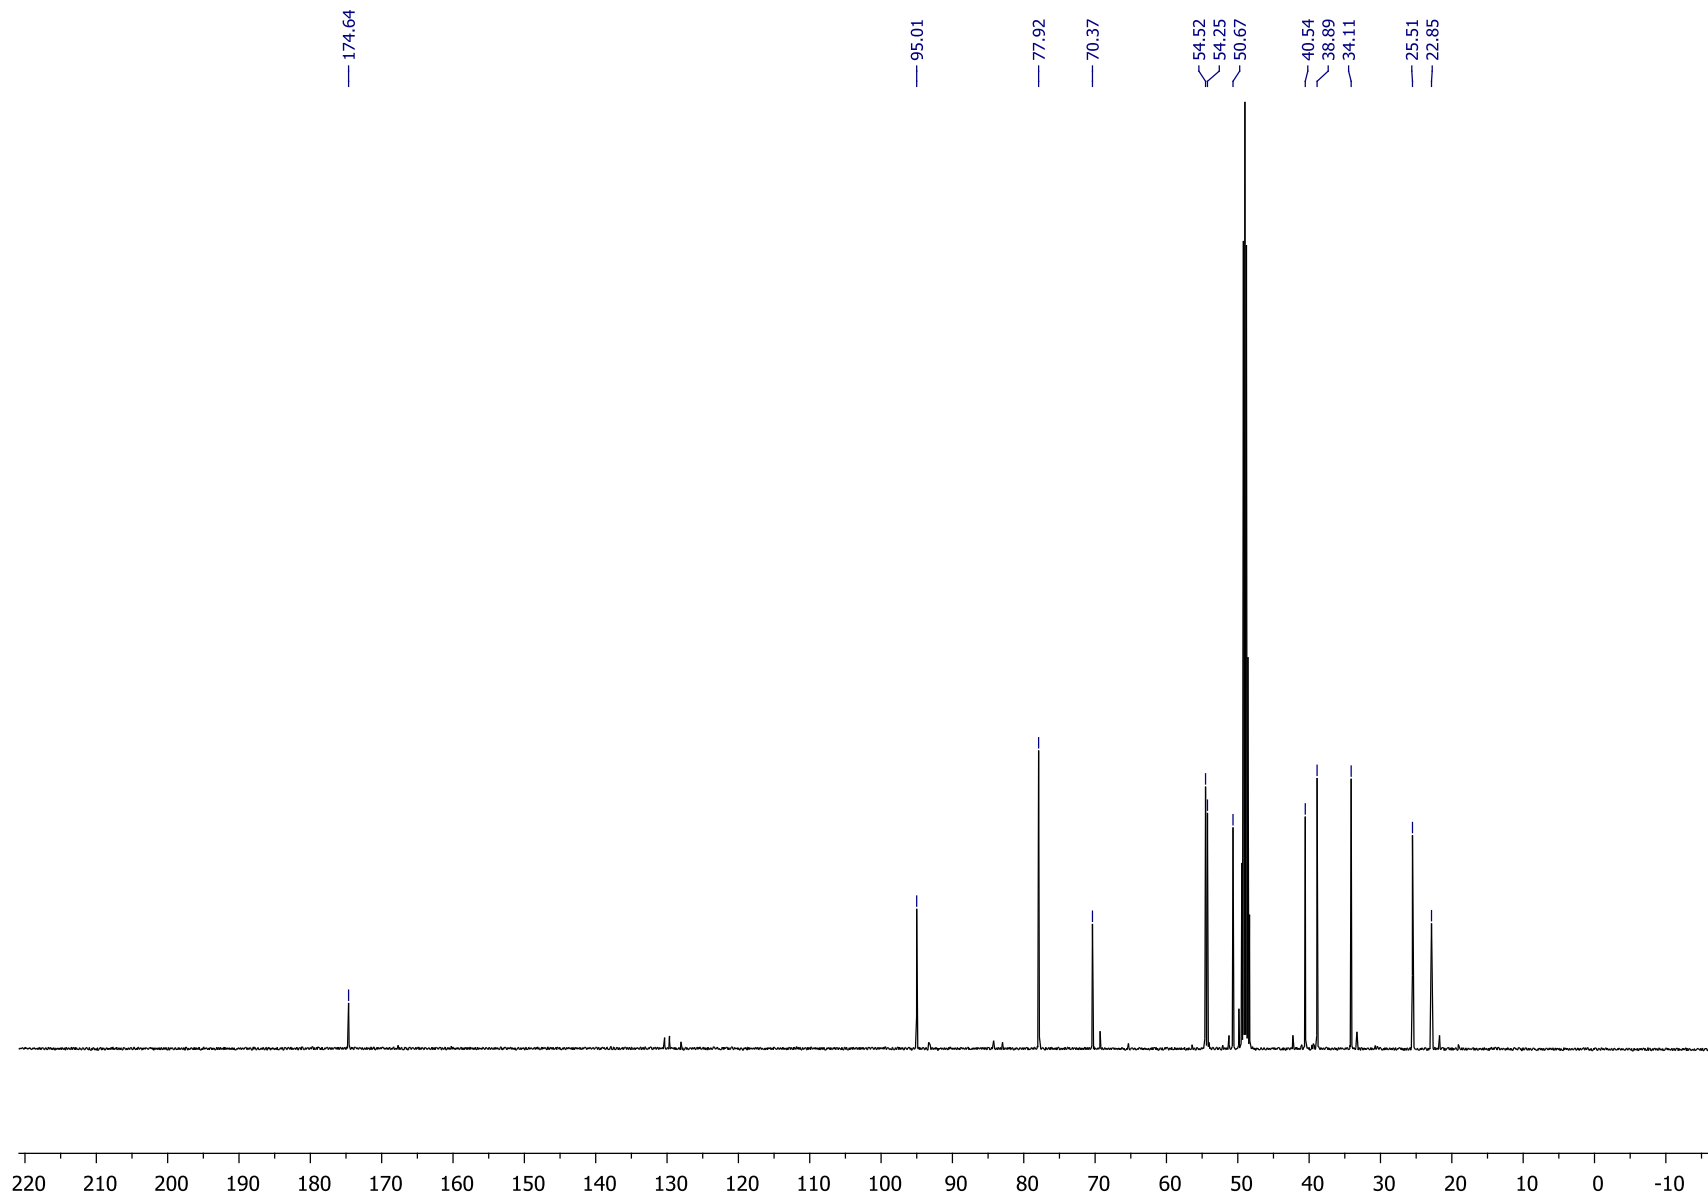

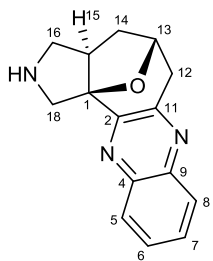

F16

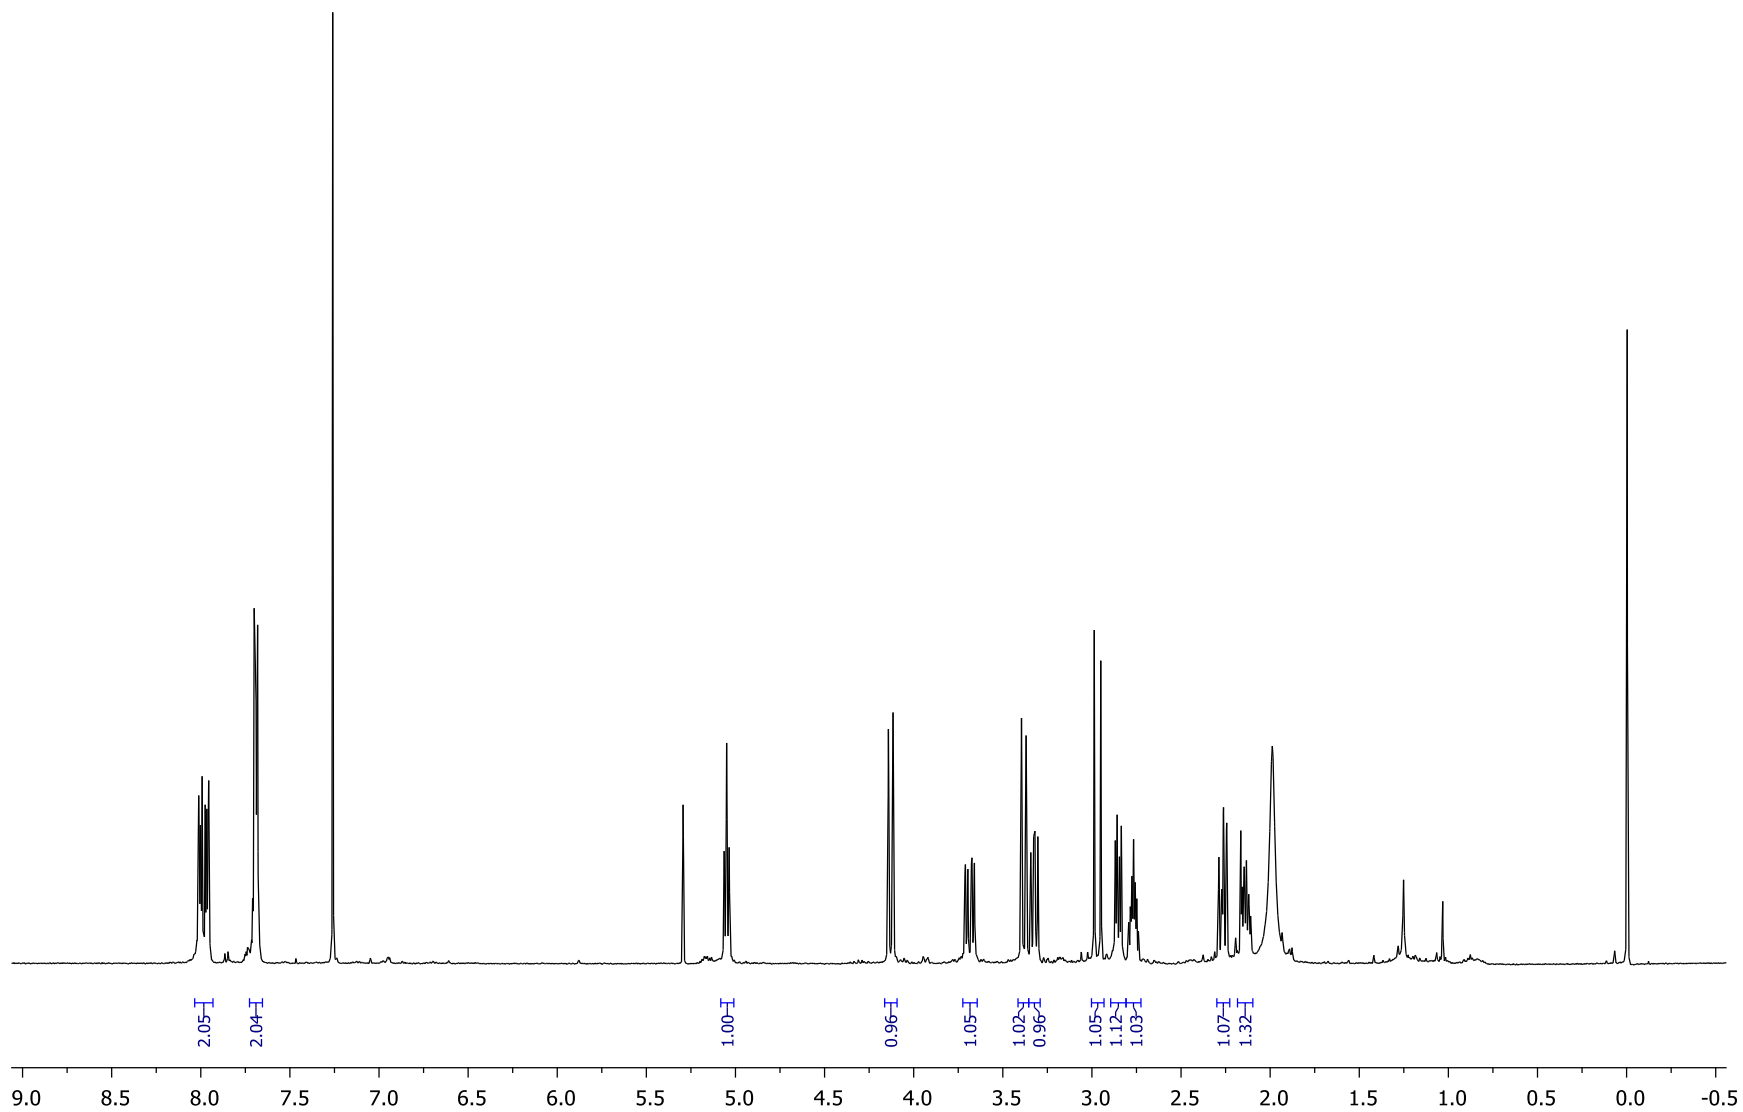

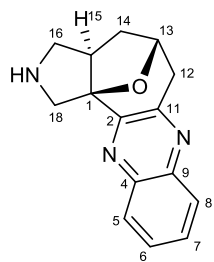

**F16**

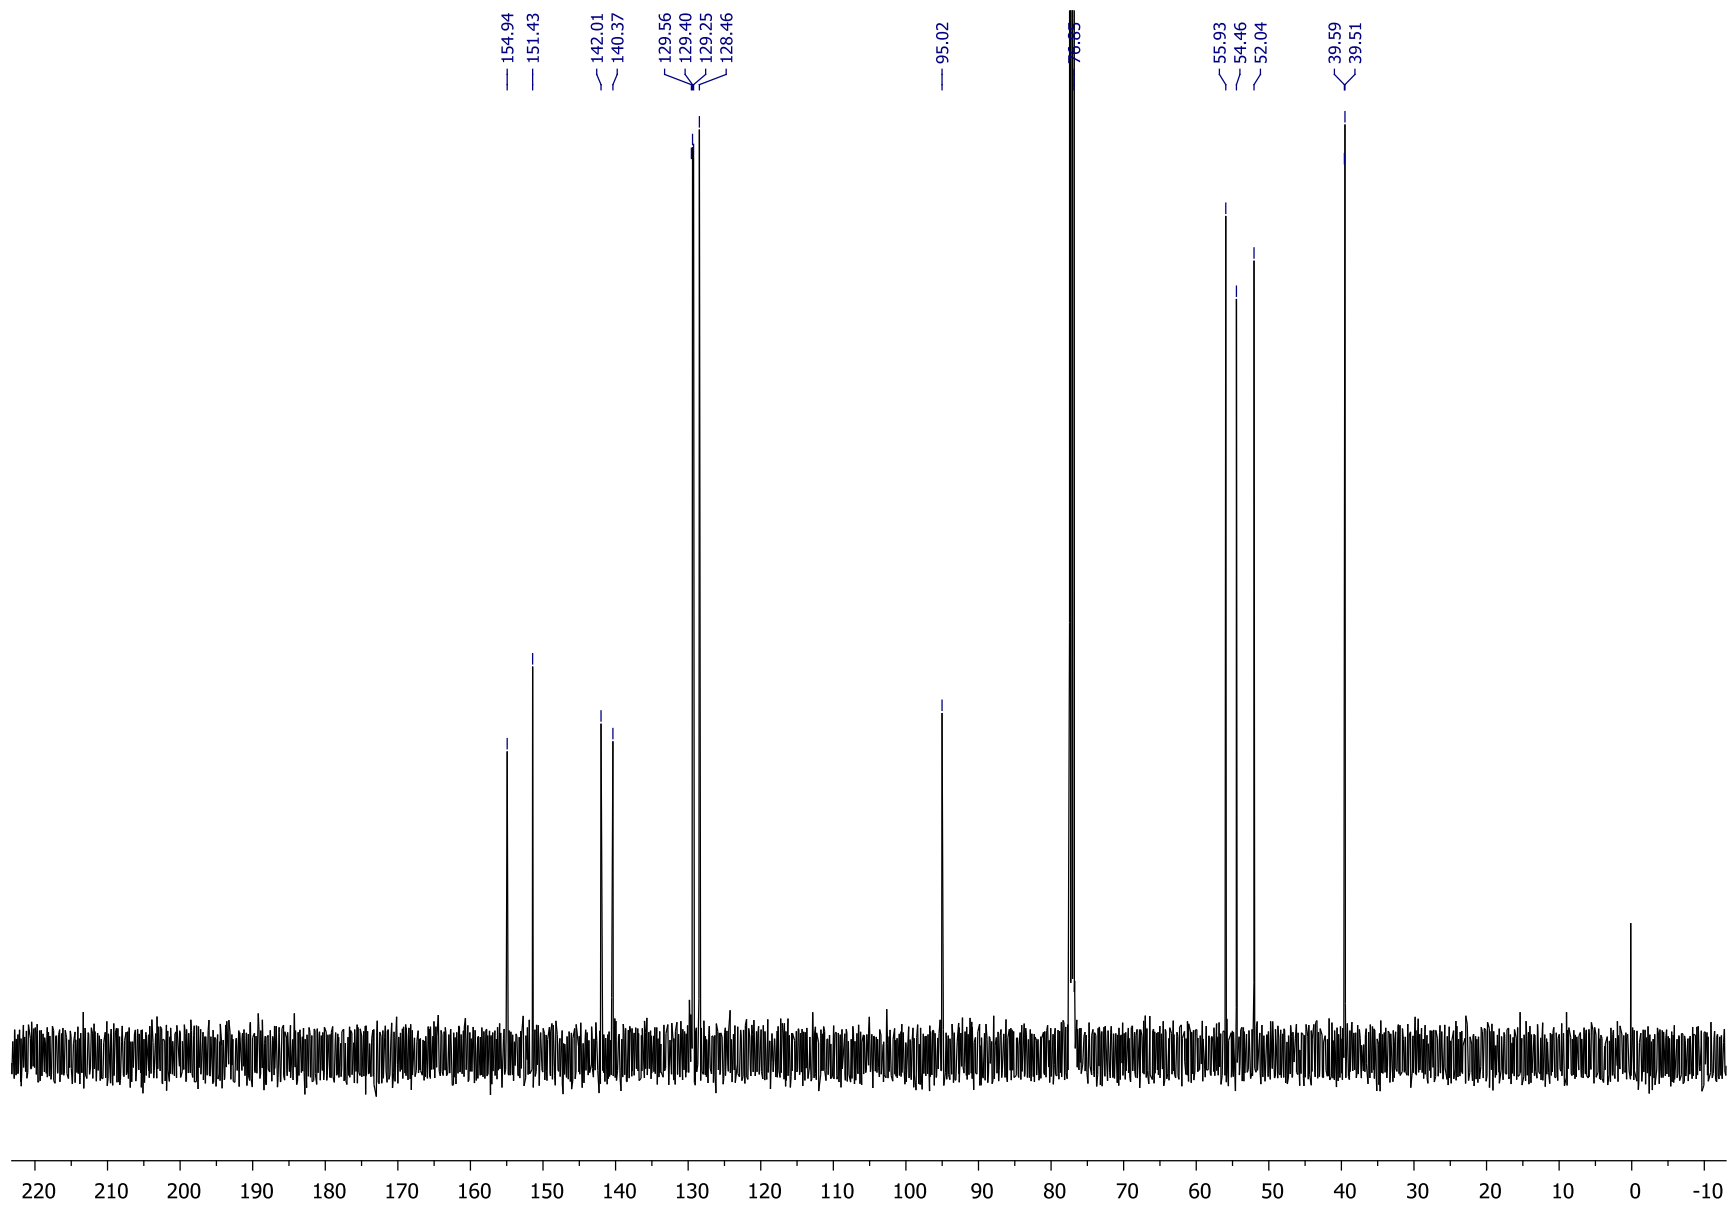



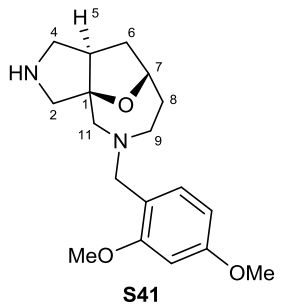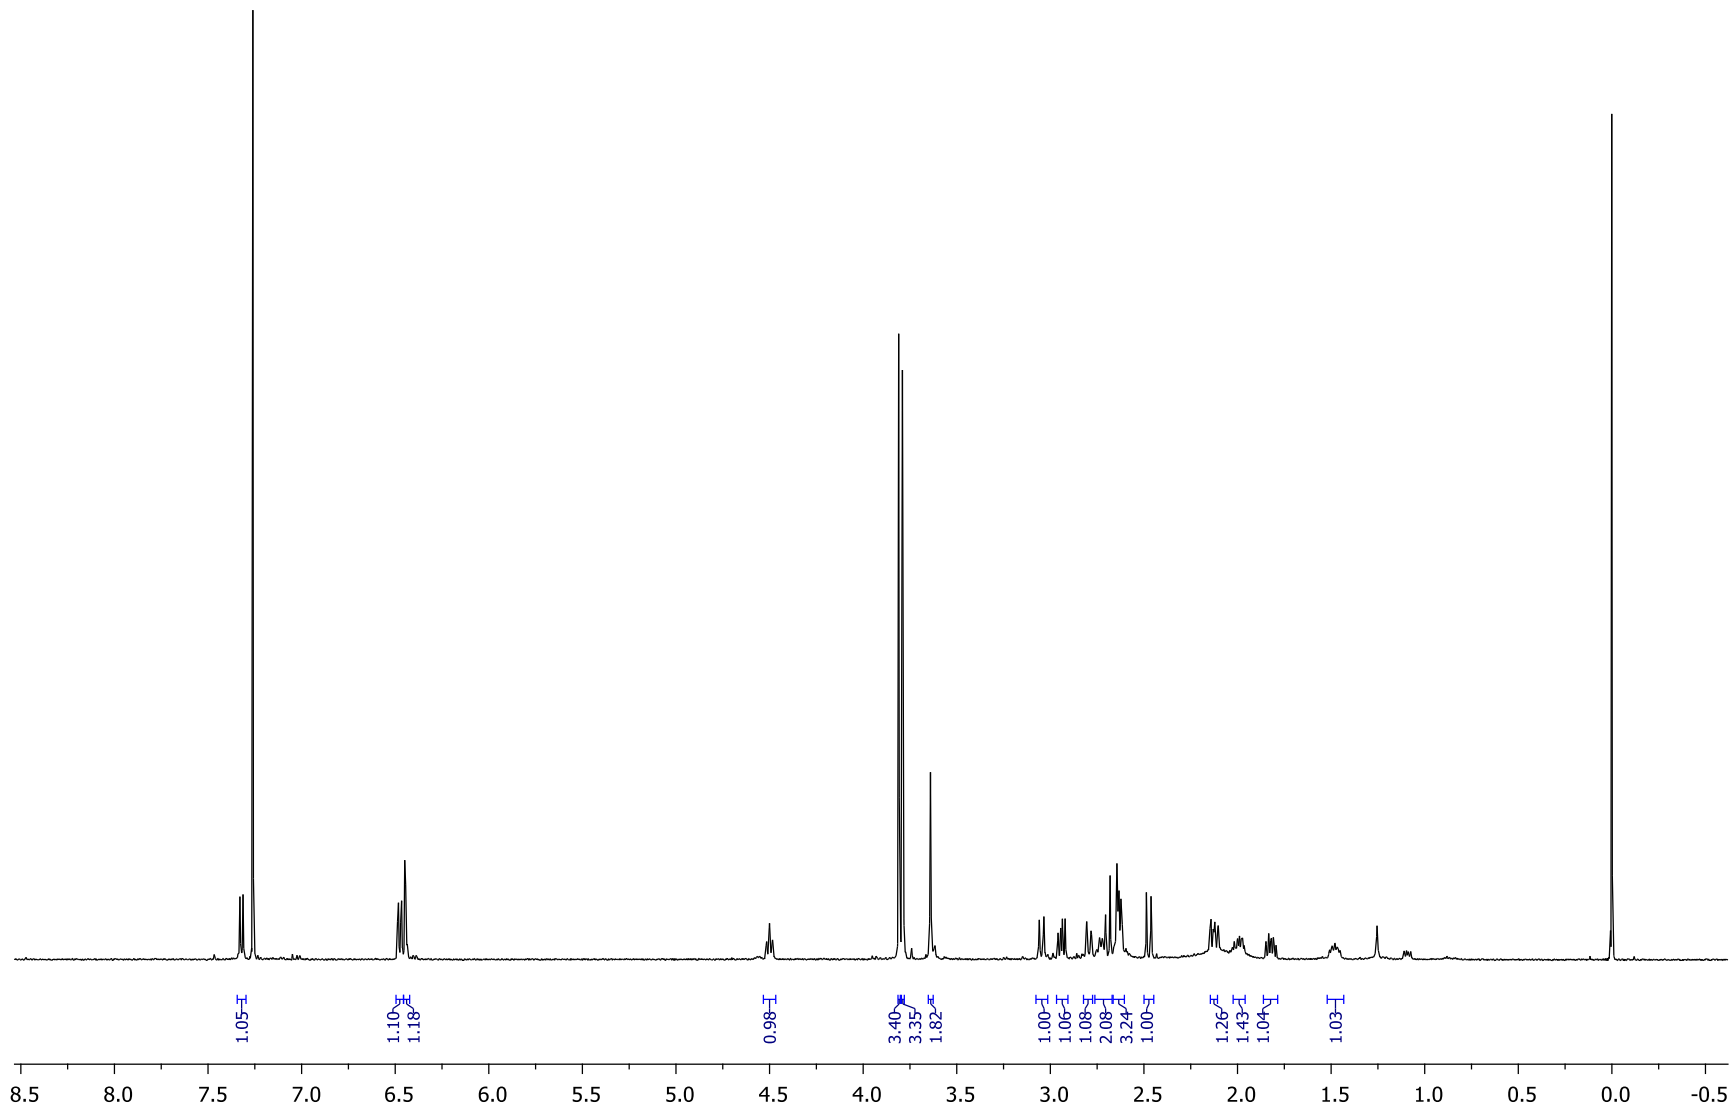

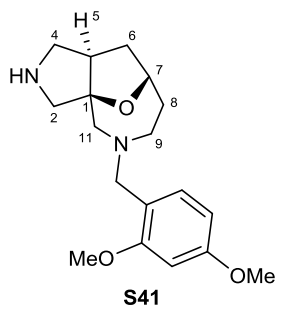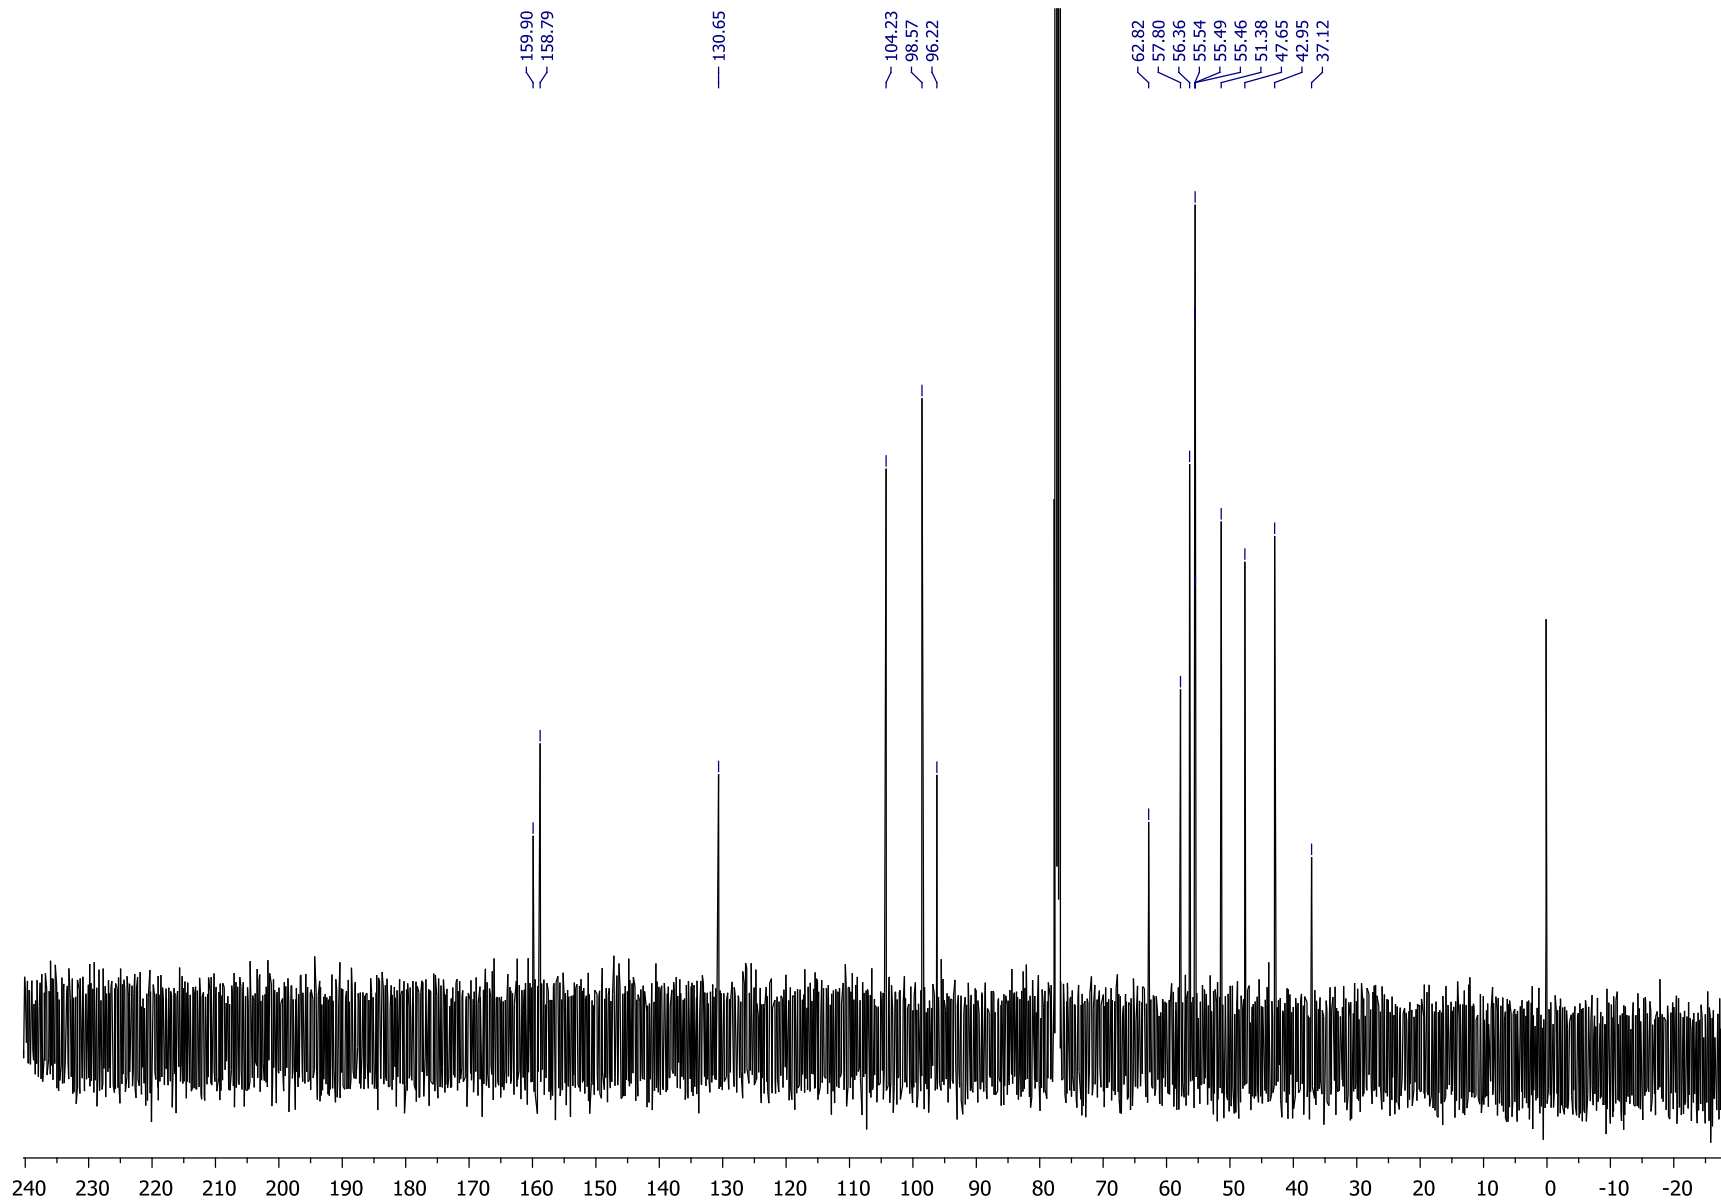

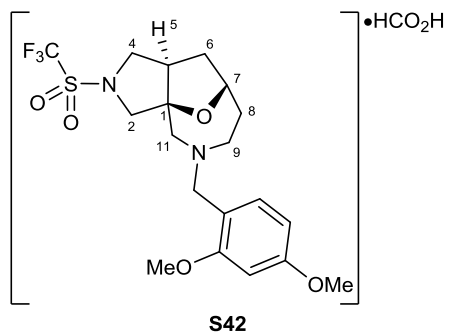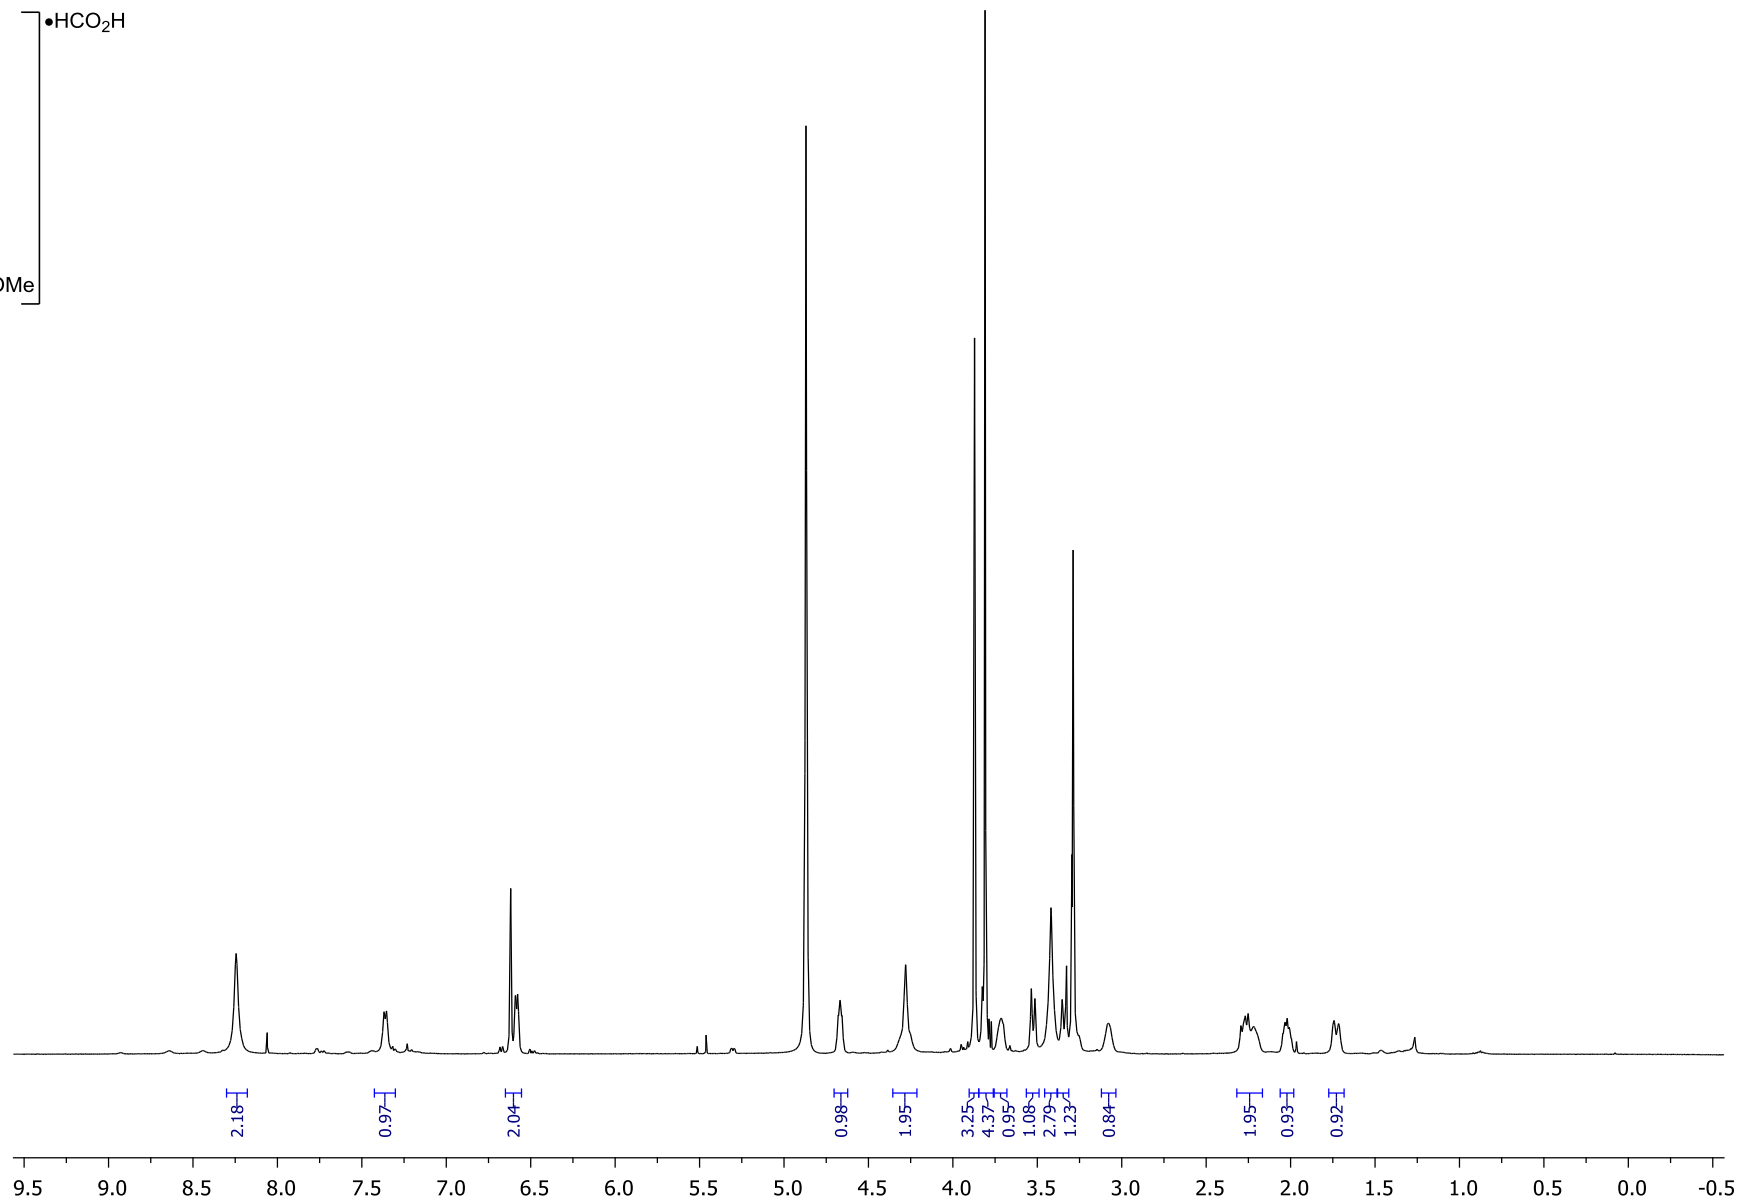

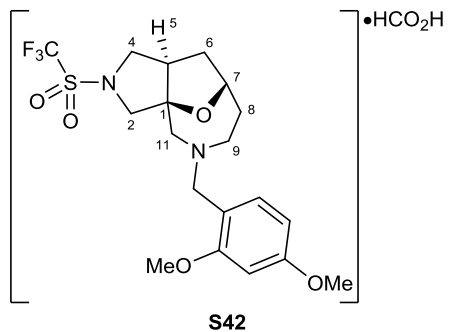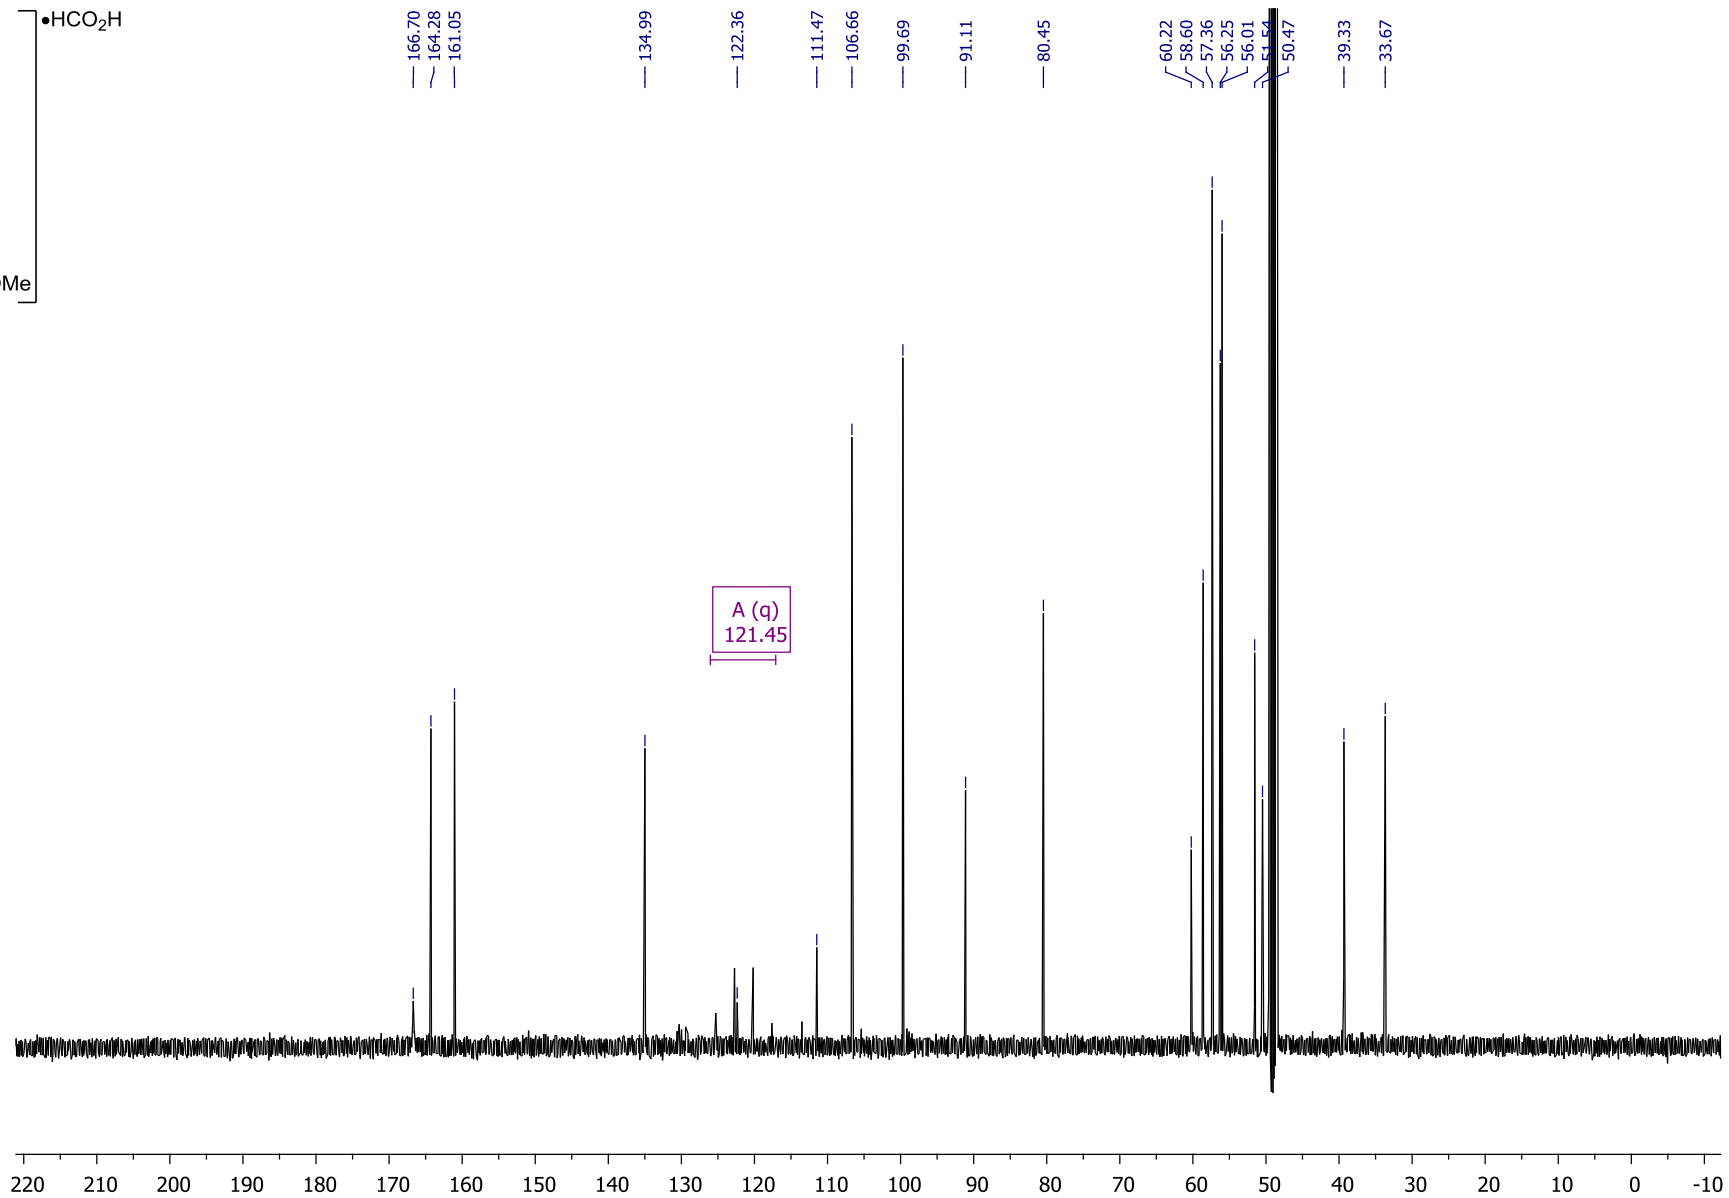

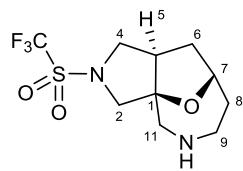

F17

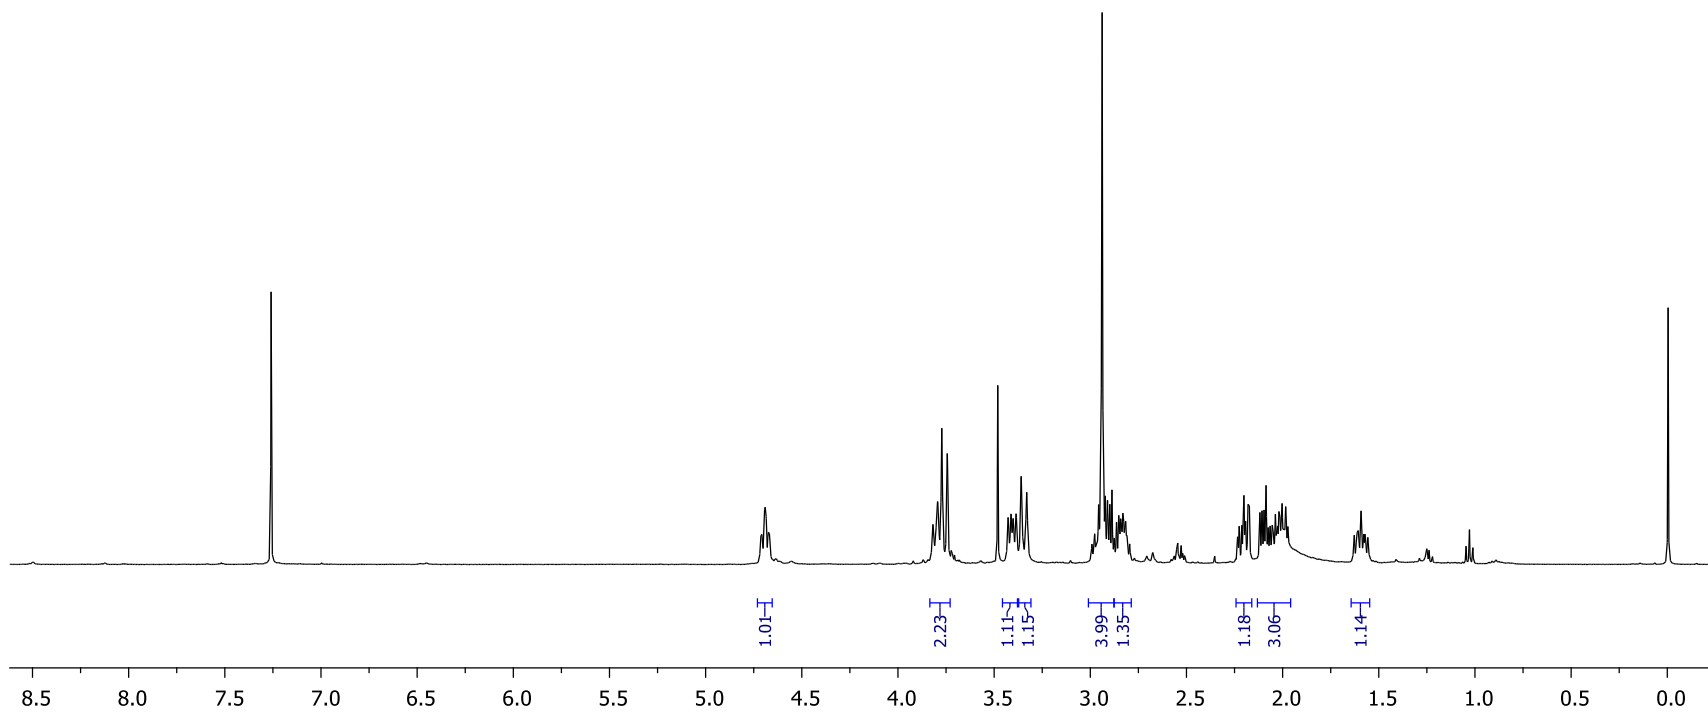

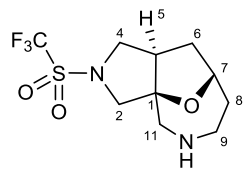

F17

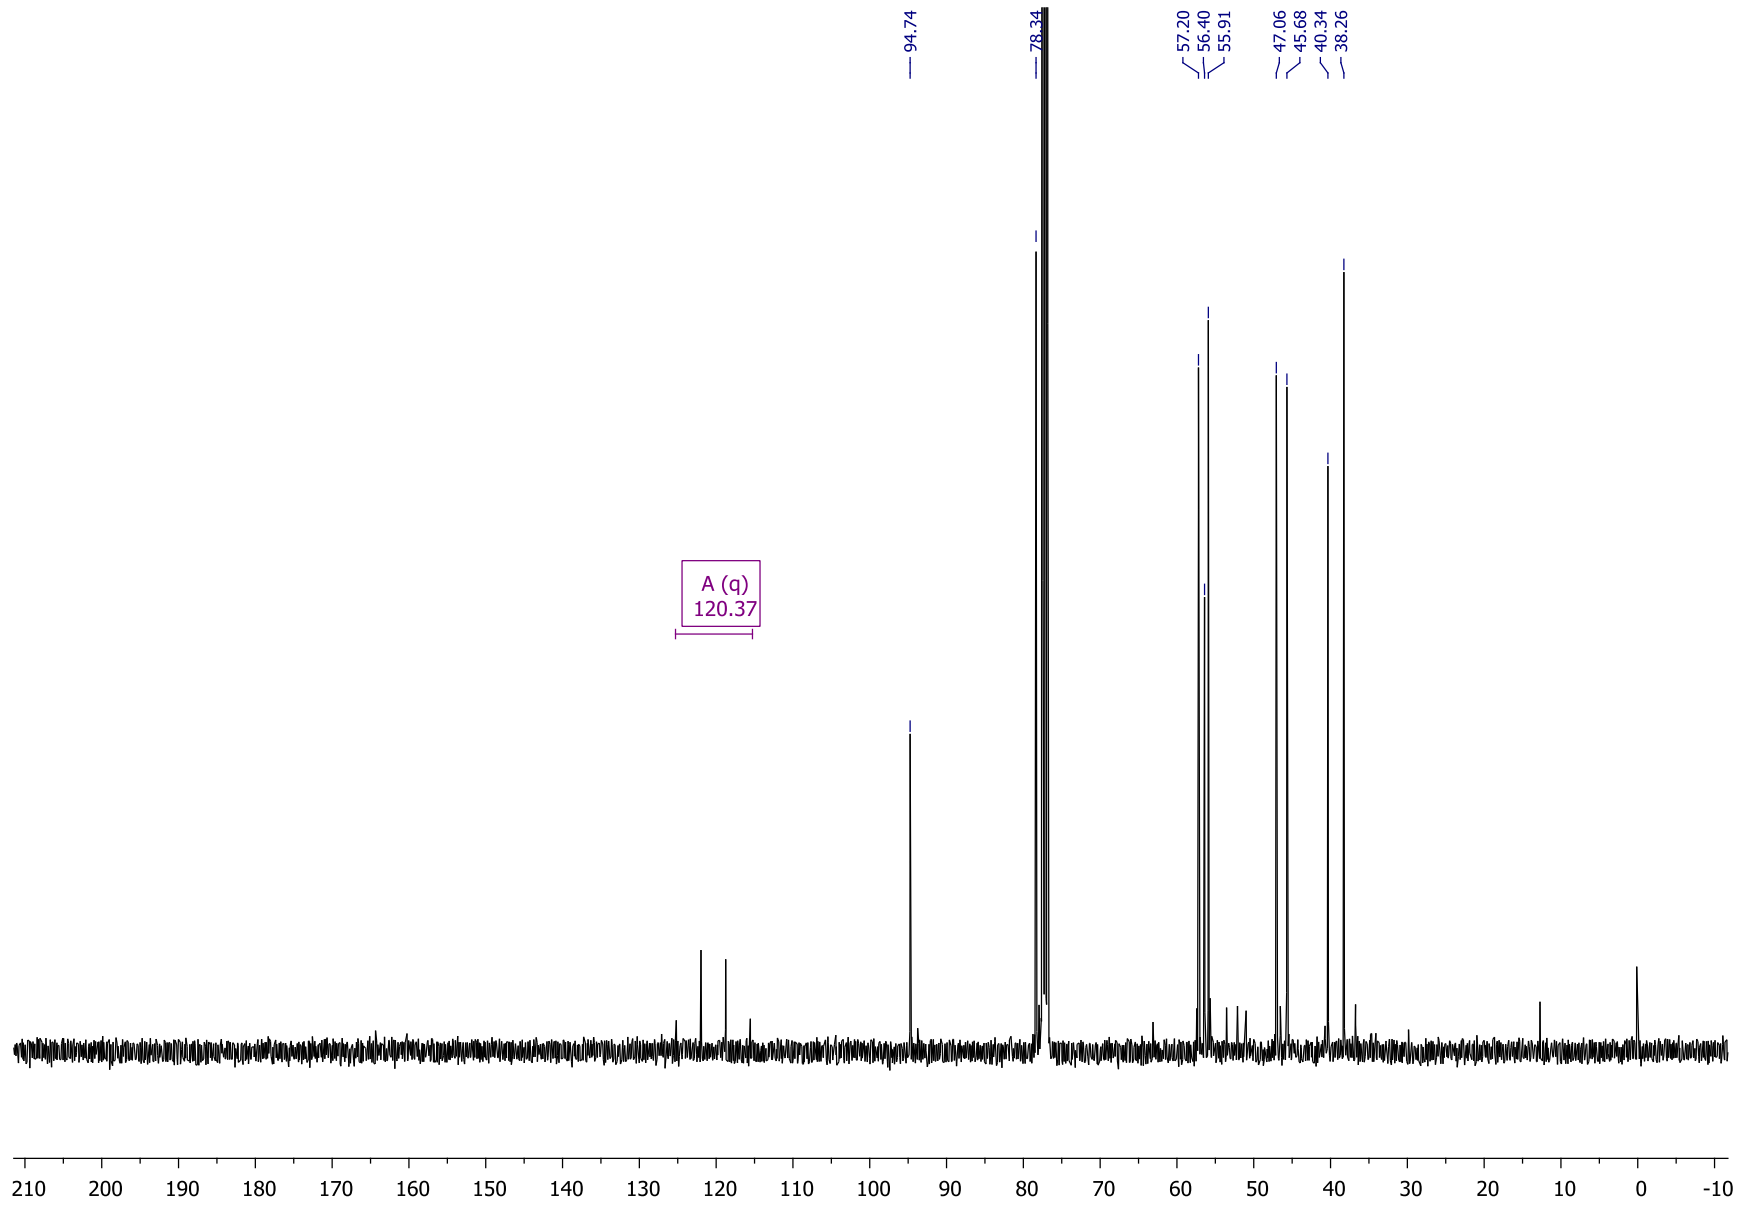

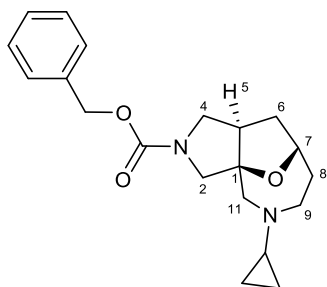

S43

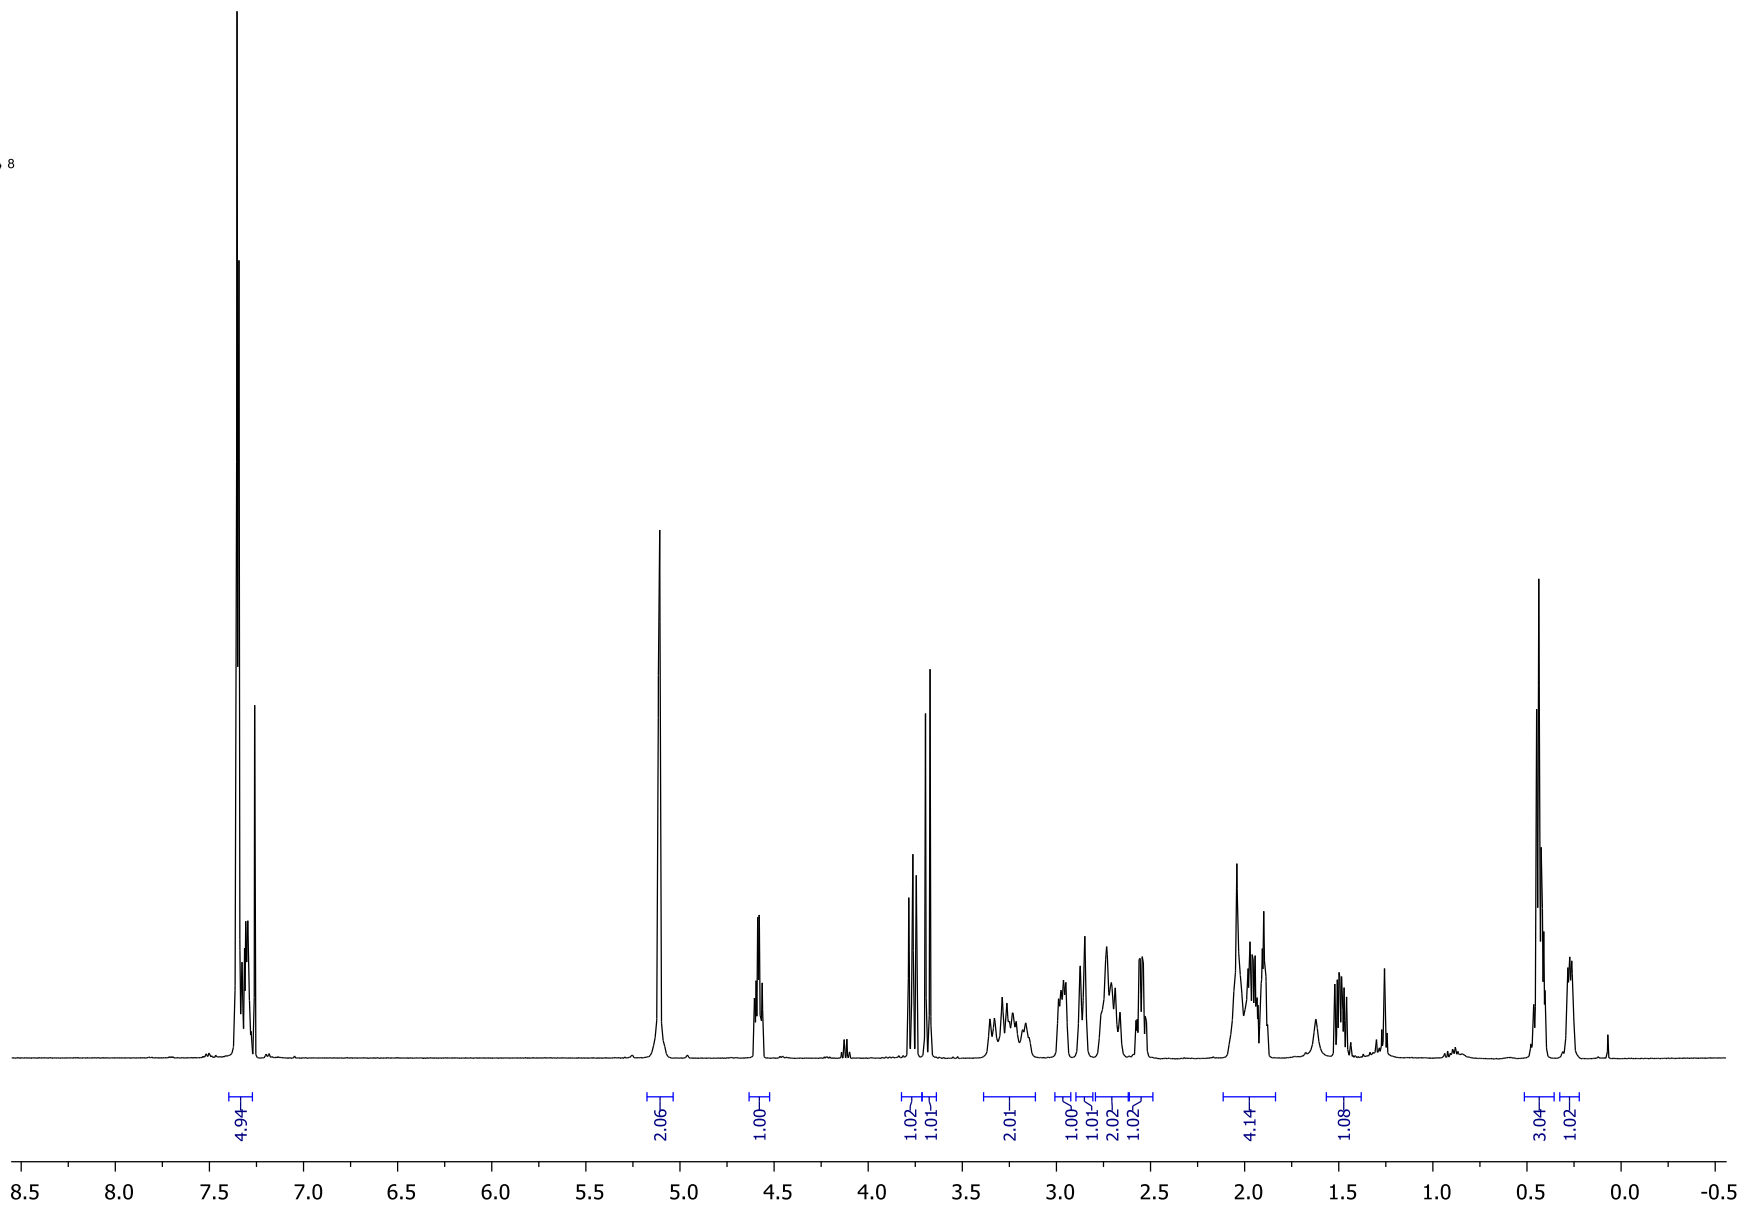

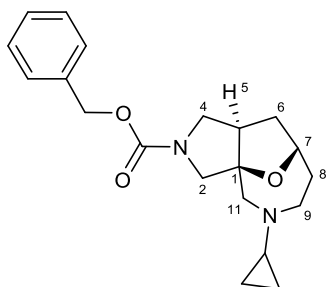

**S43**

(CDCl<sub>3</sub> @ 329 K)

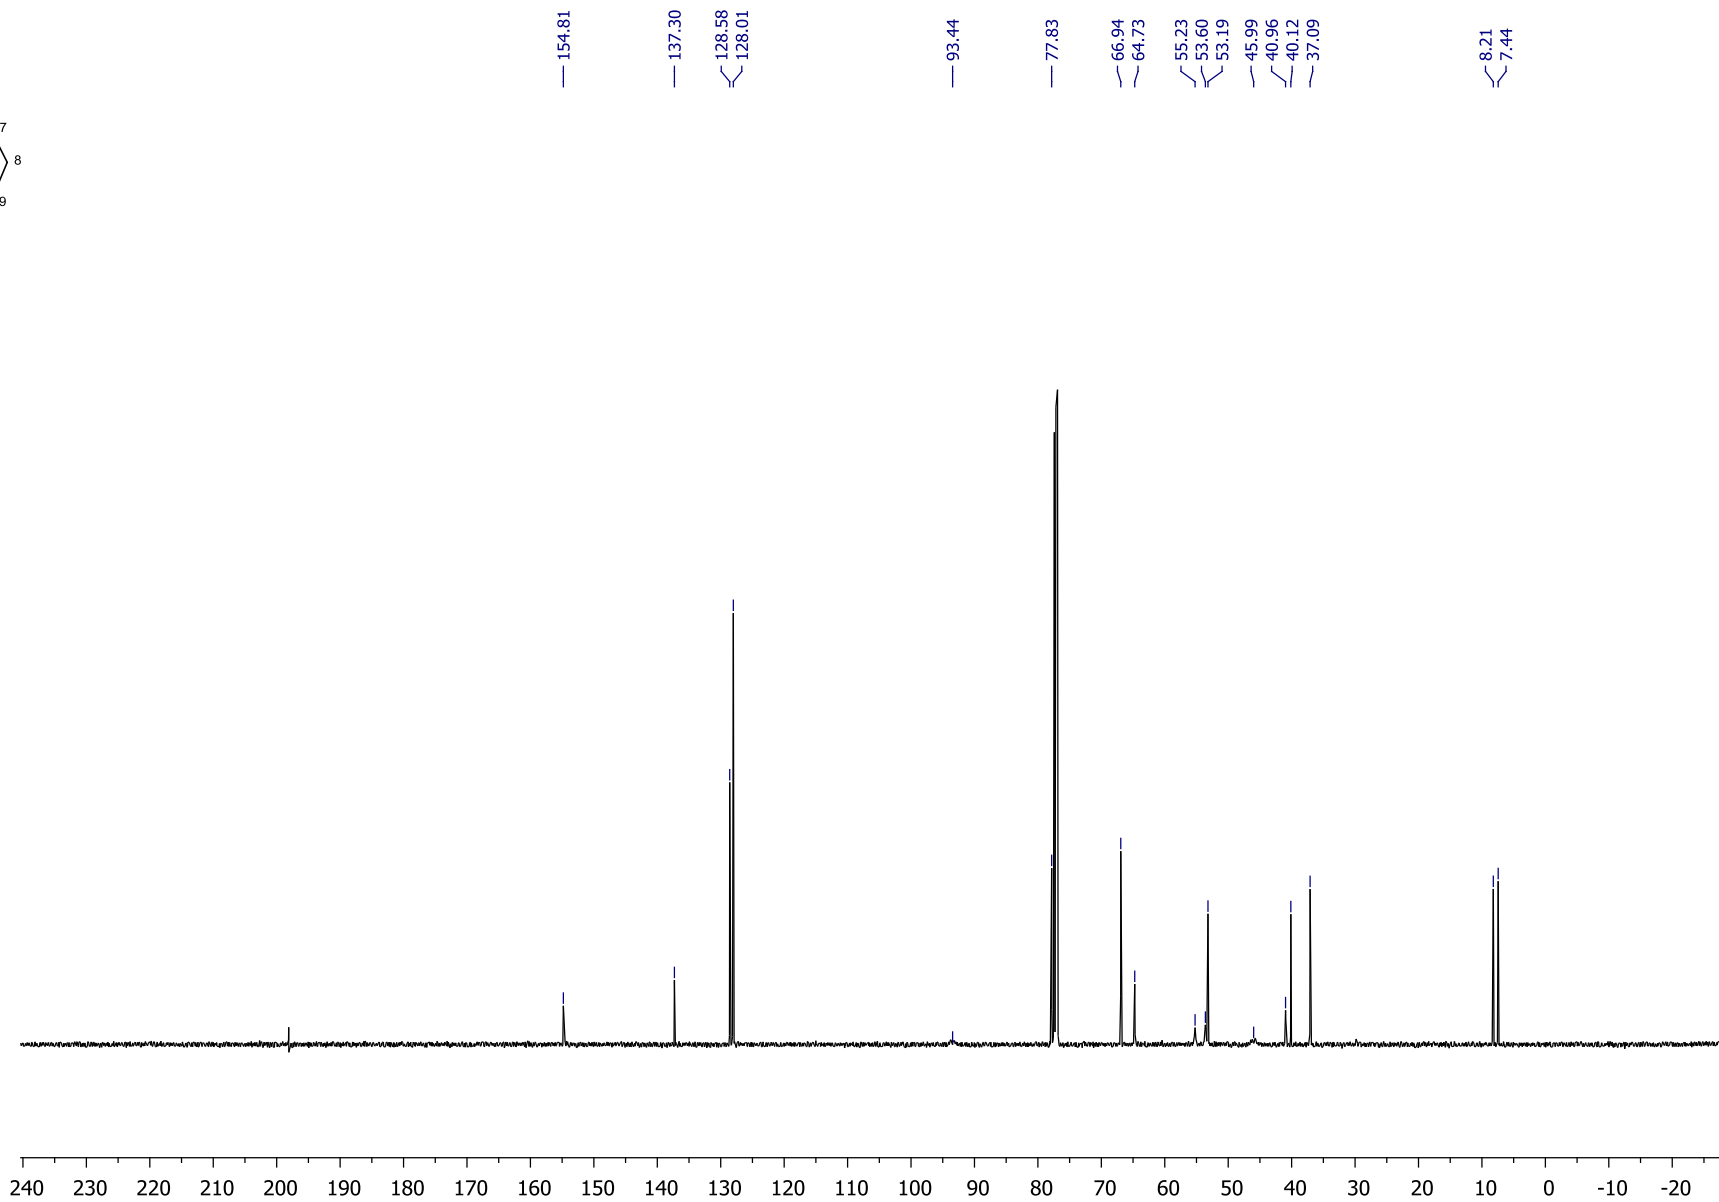



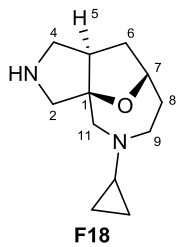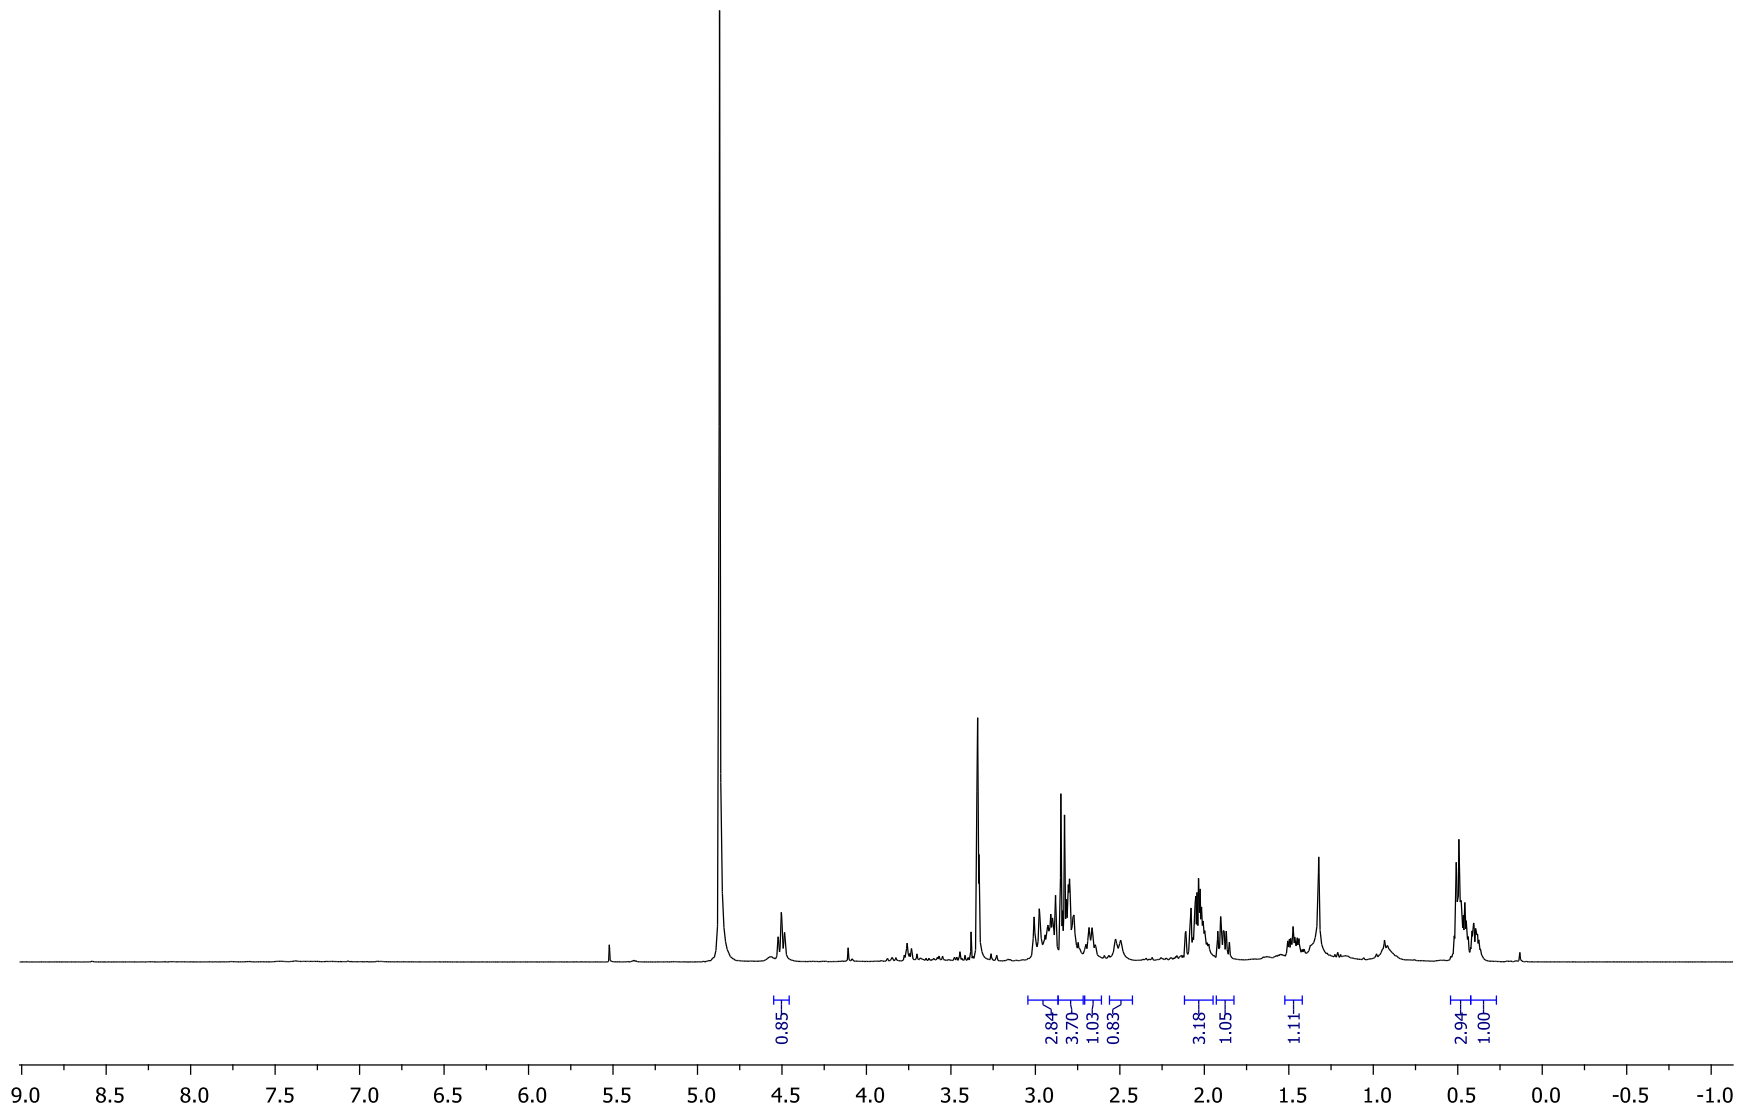

340

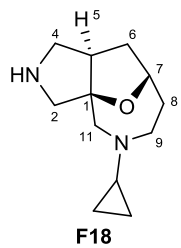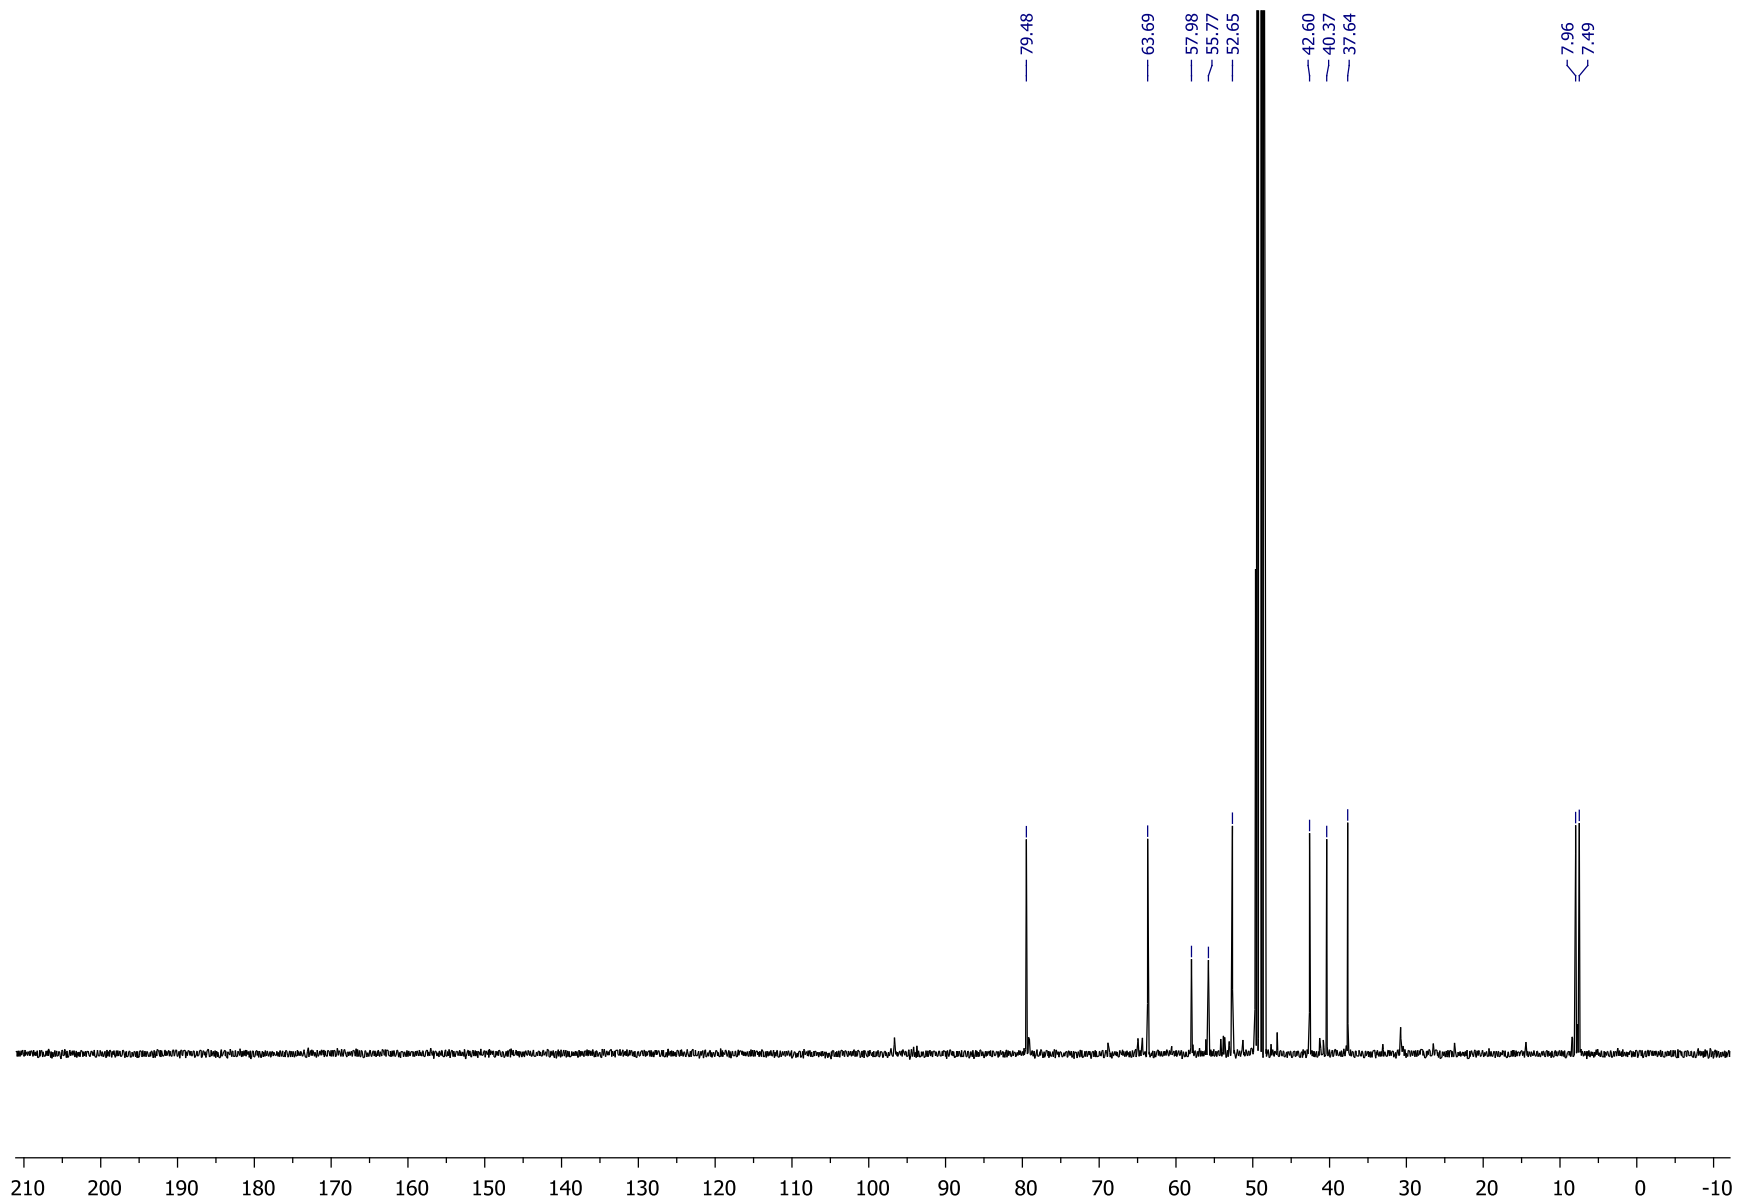

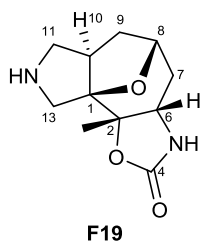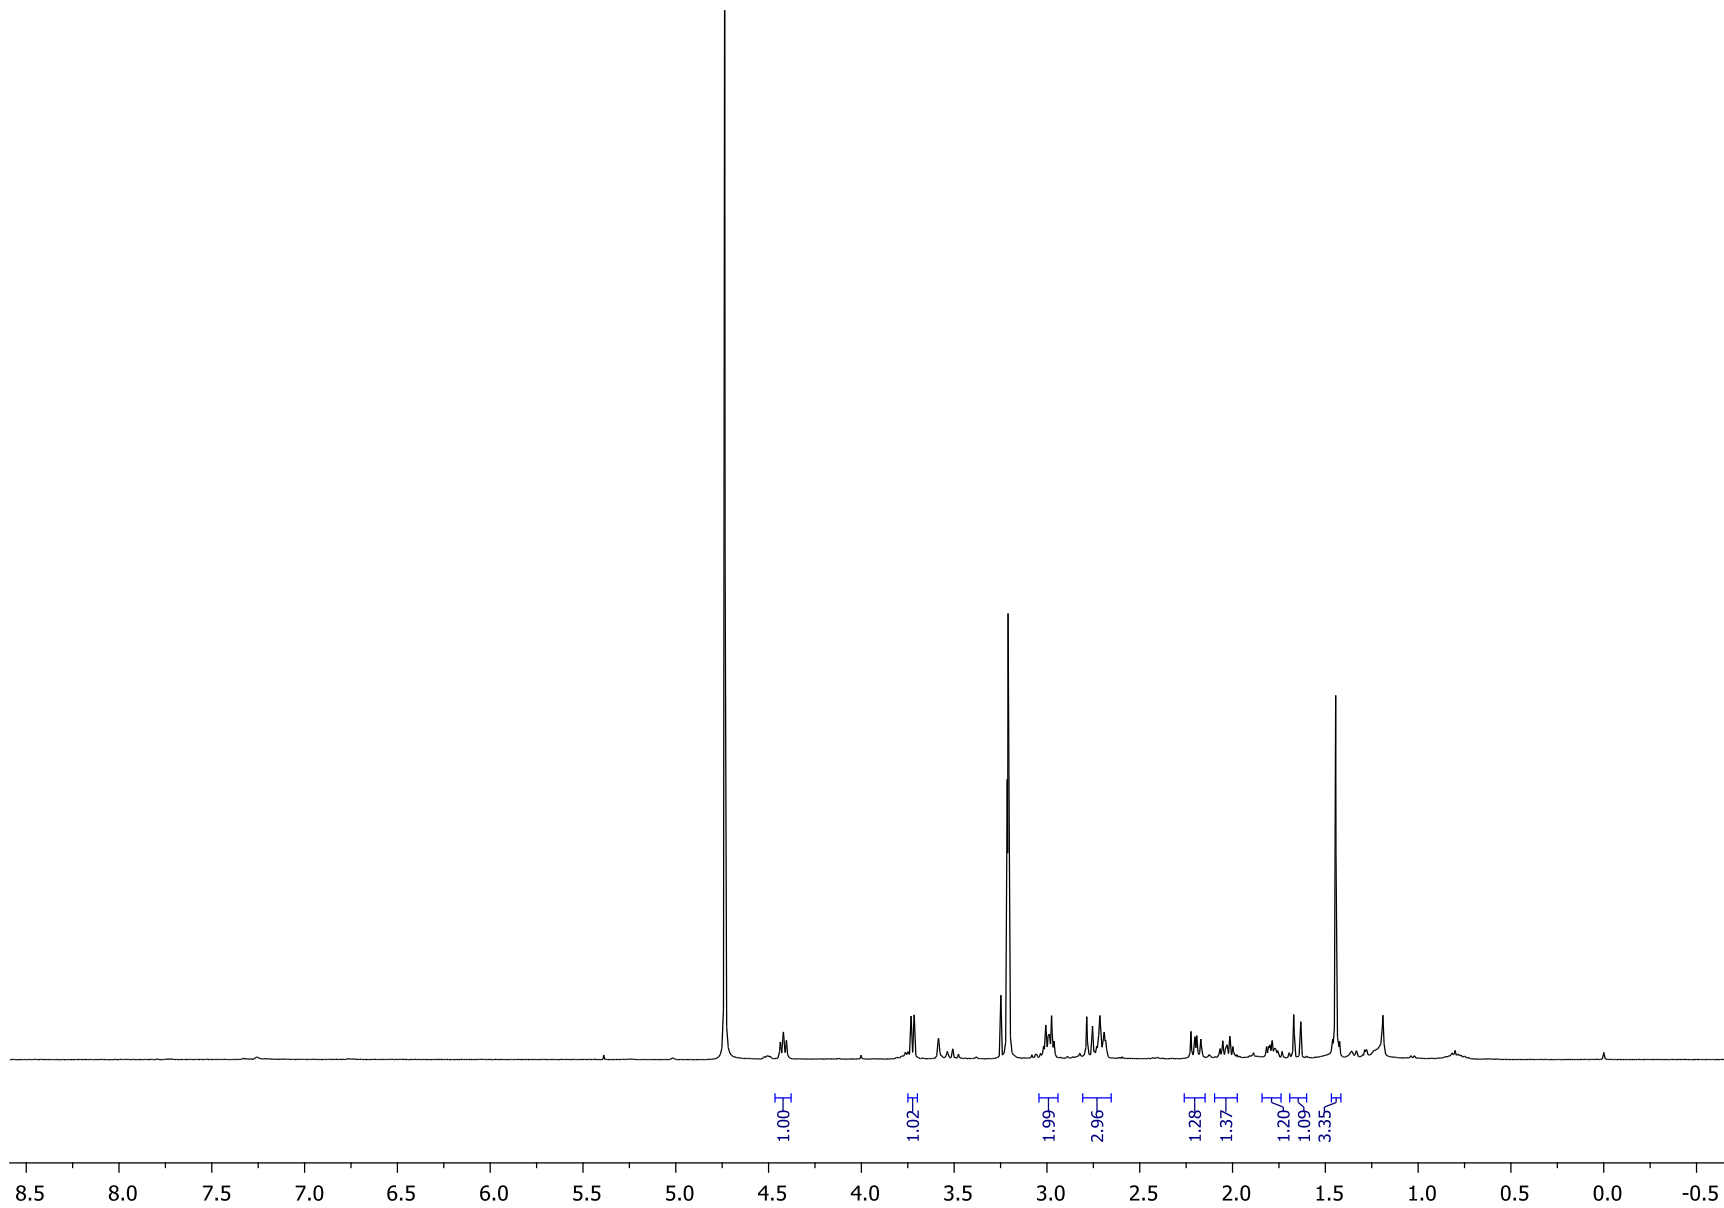

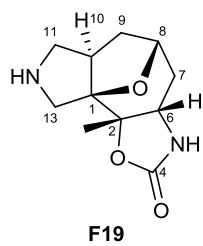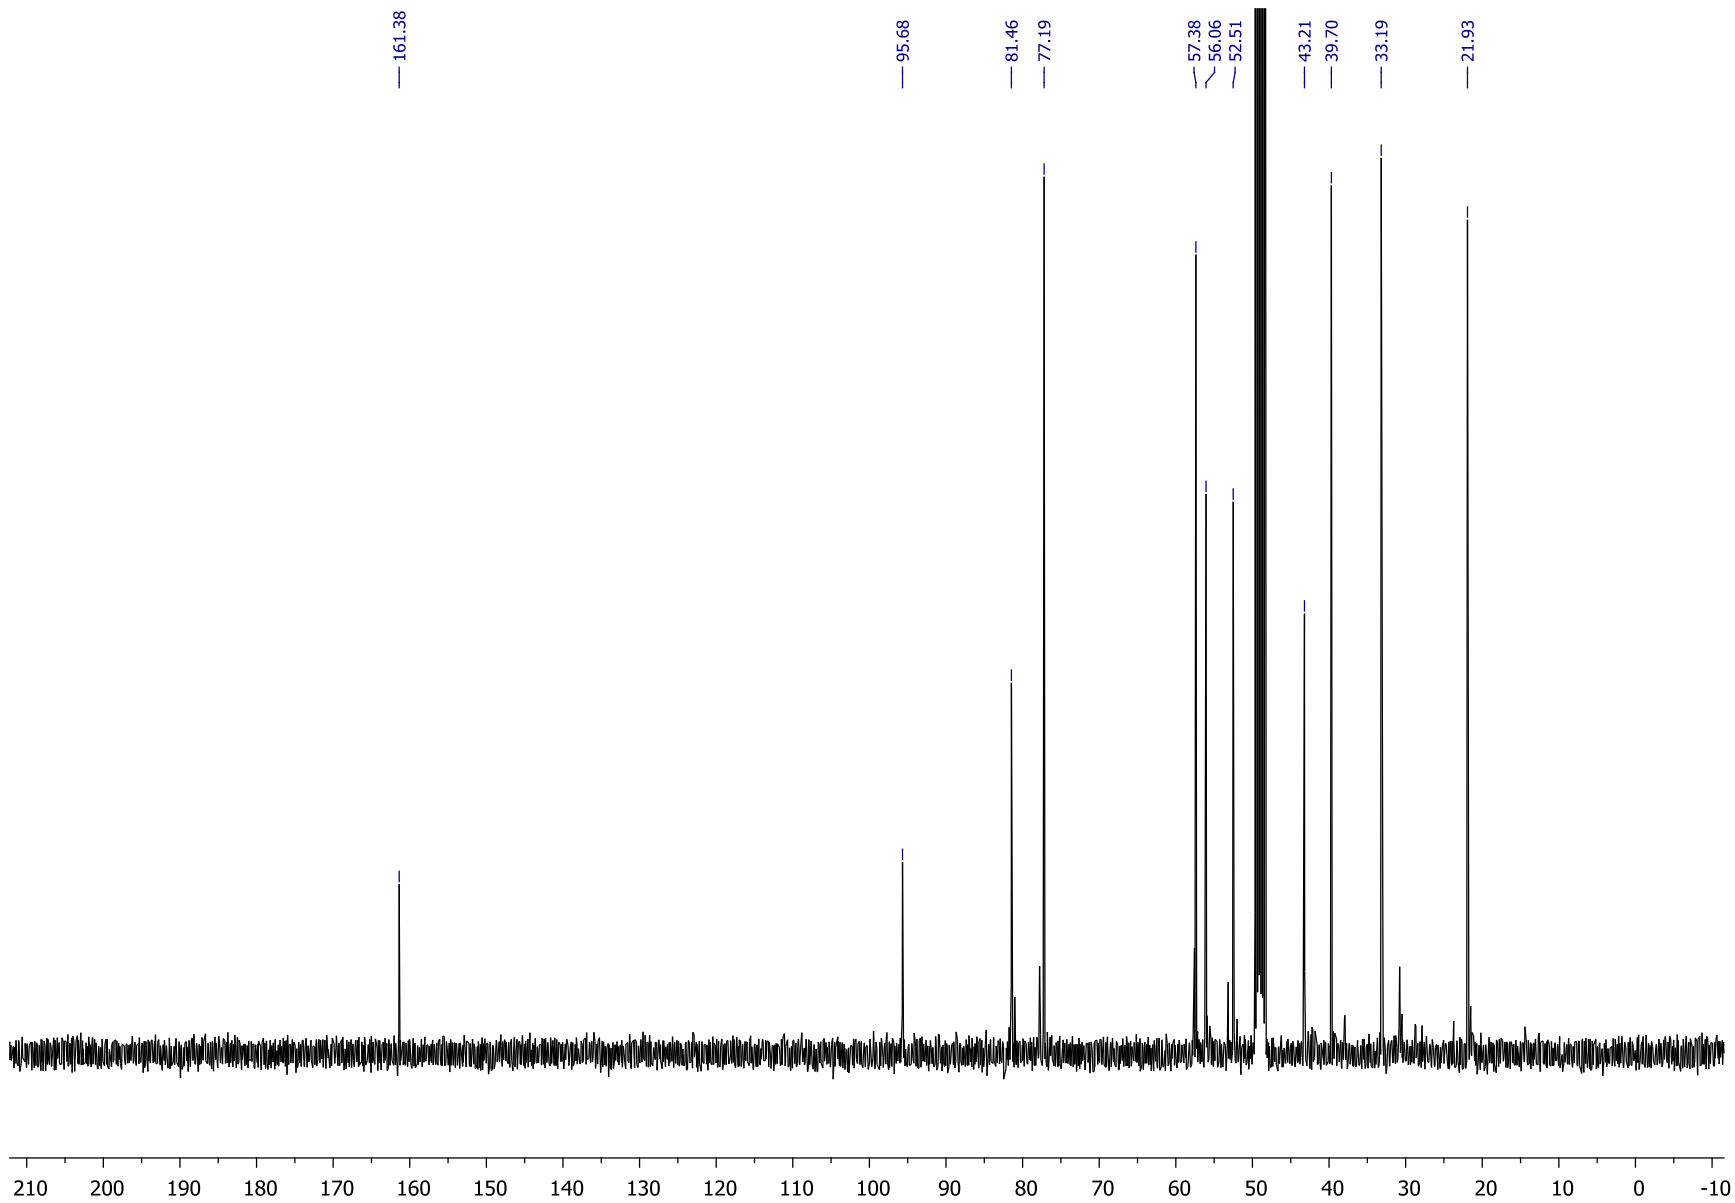

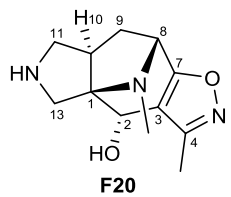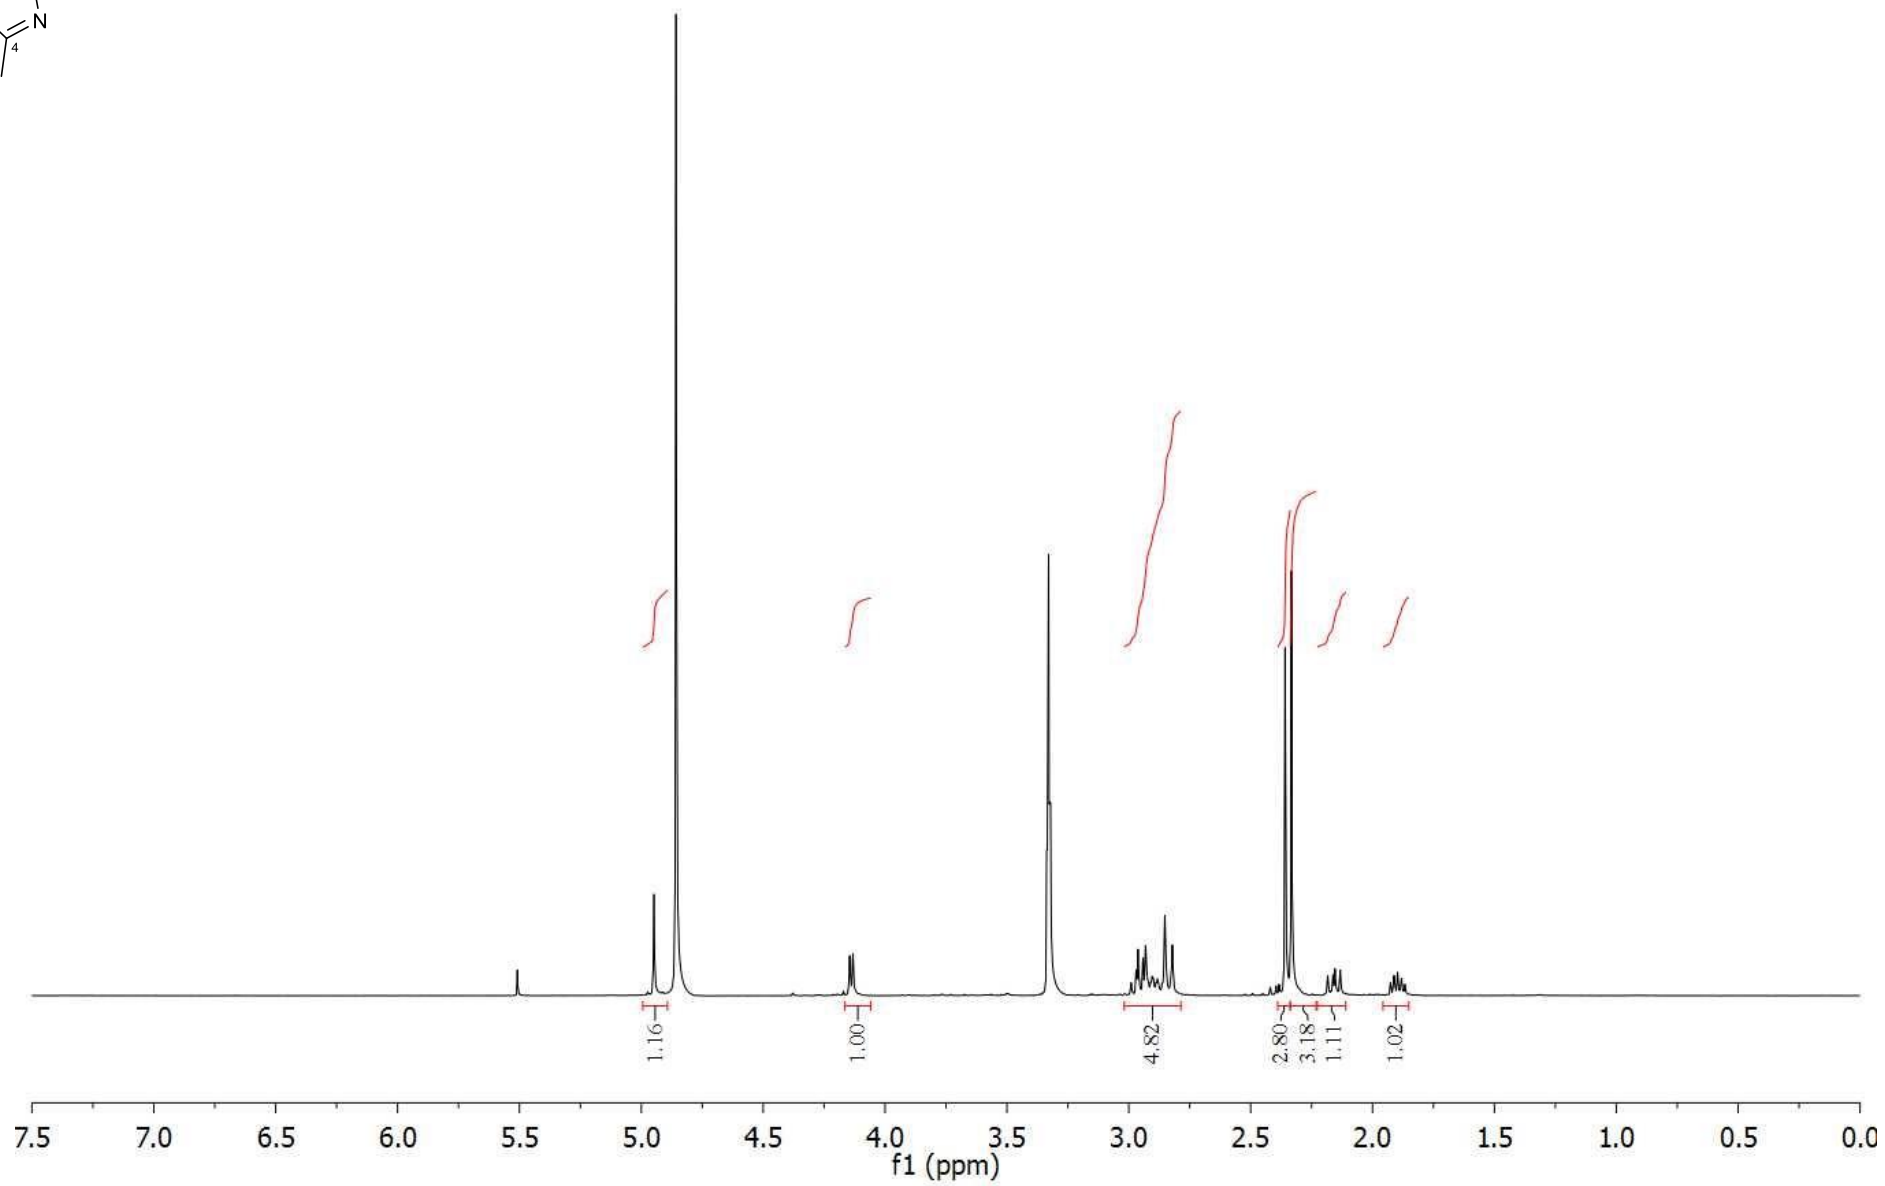

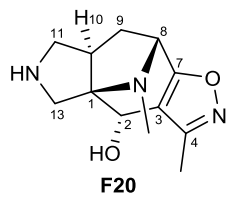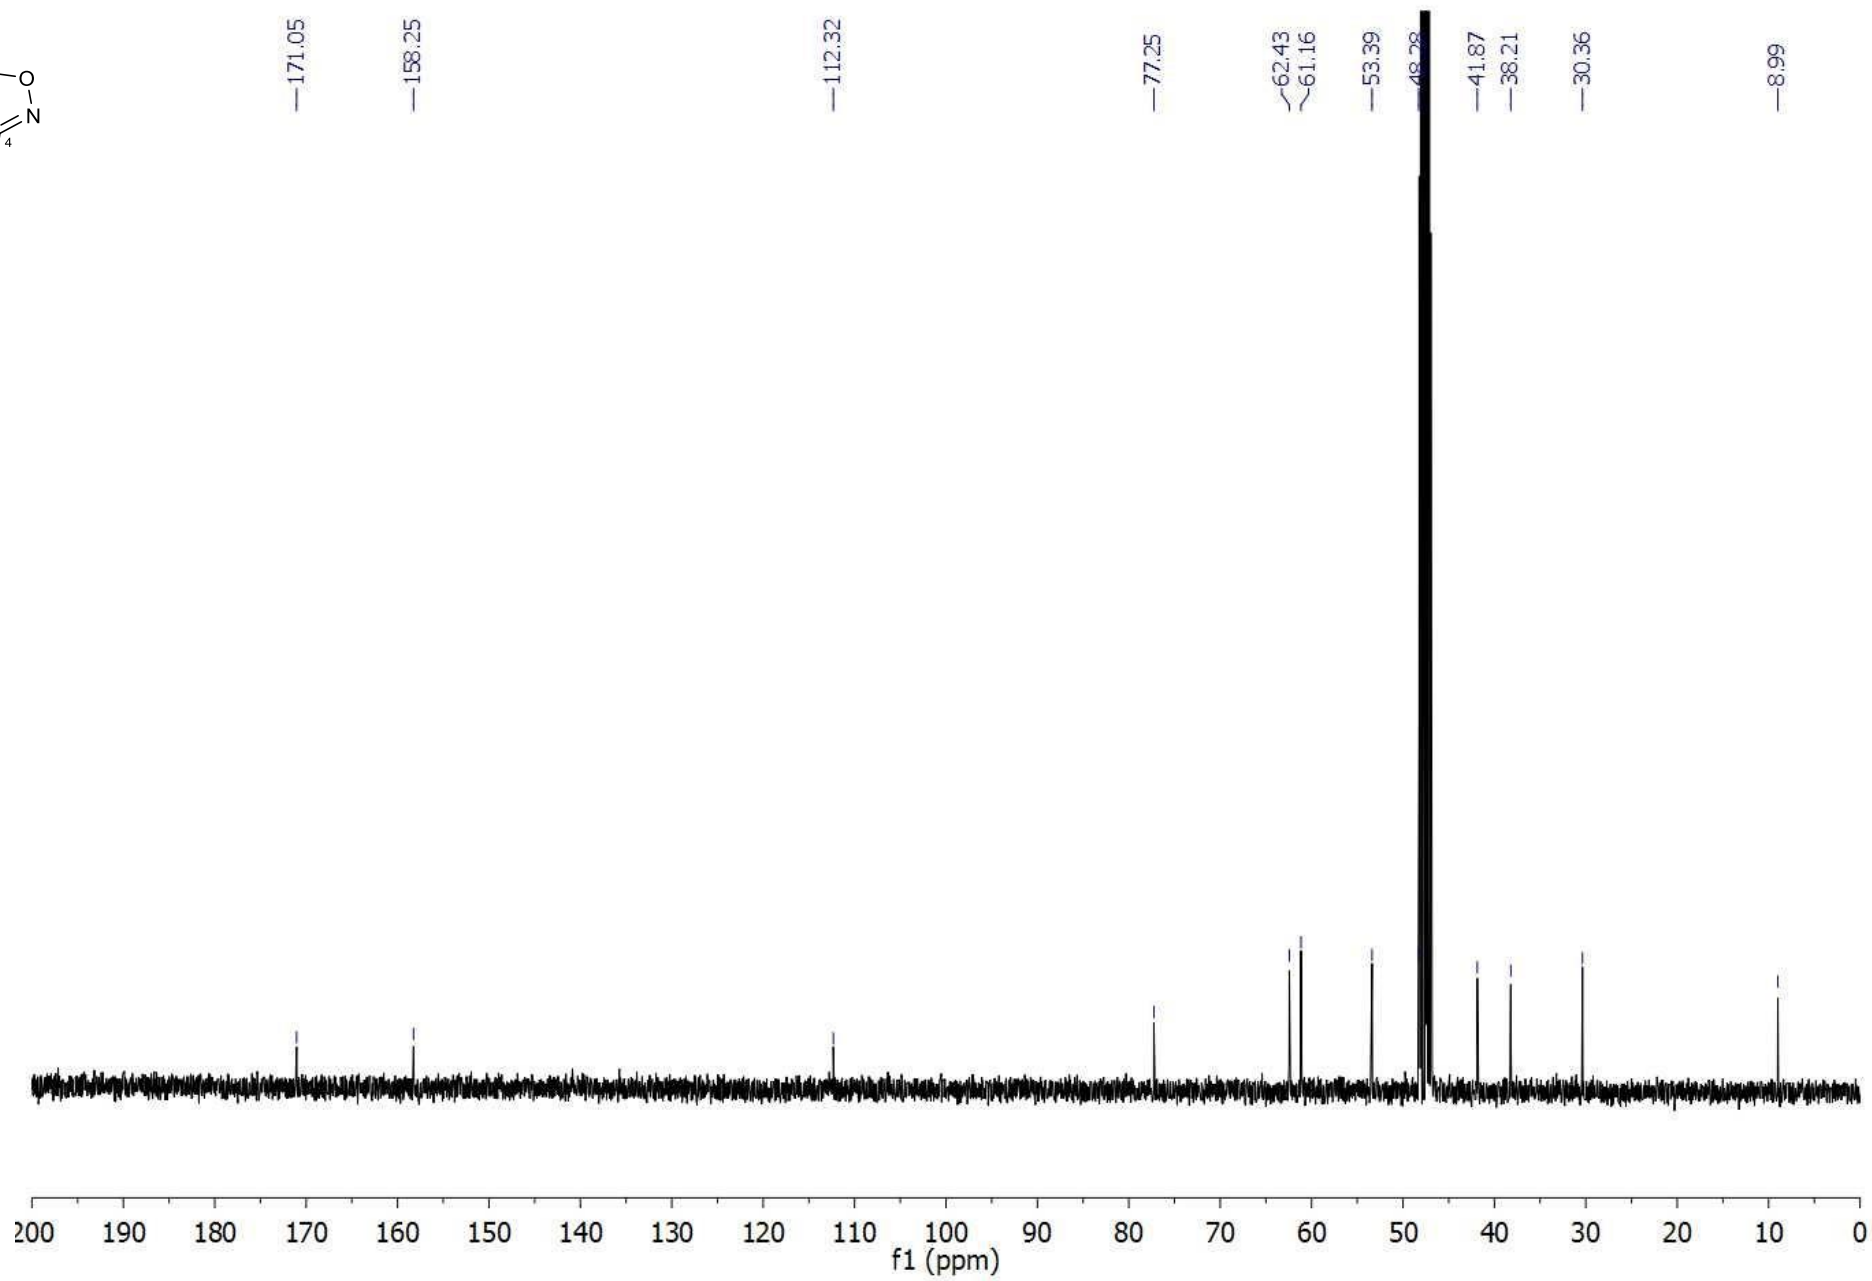

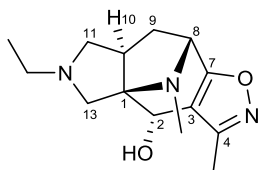

**F21**

(MeOD-d<sub>4</sub> @ 333 K)

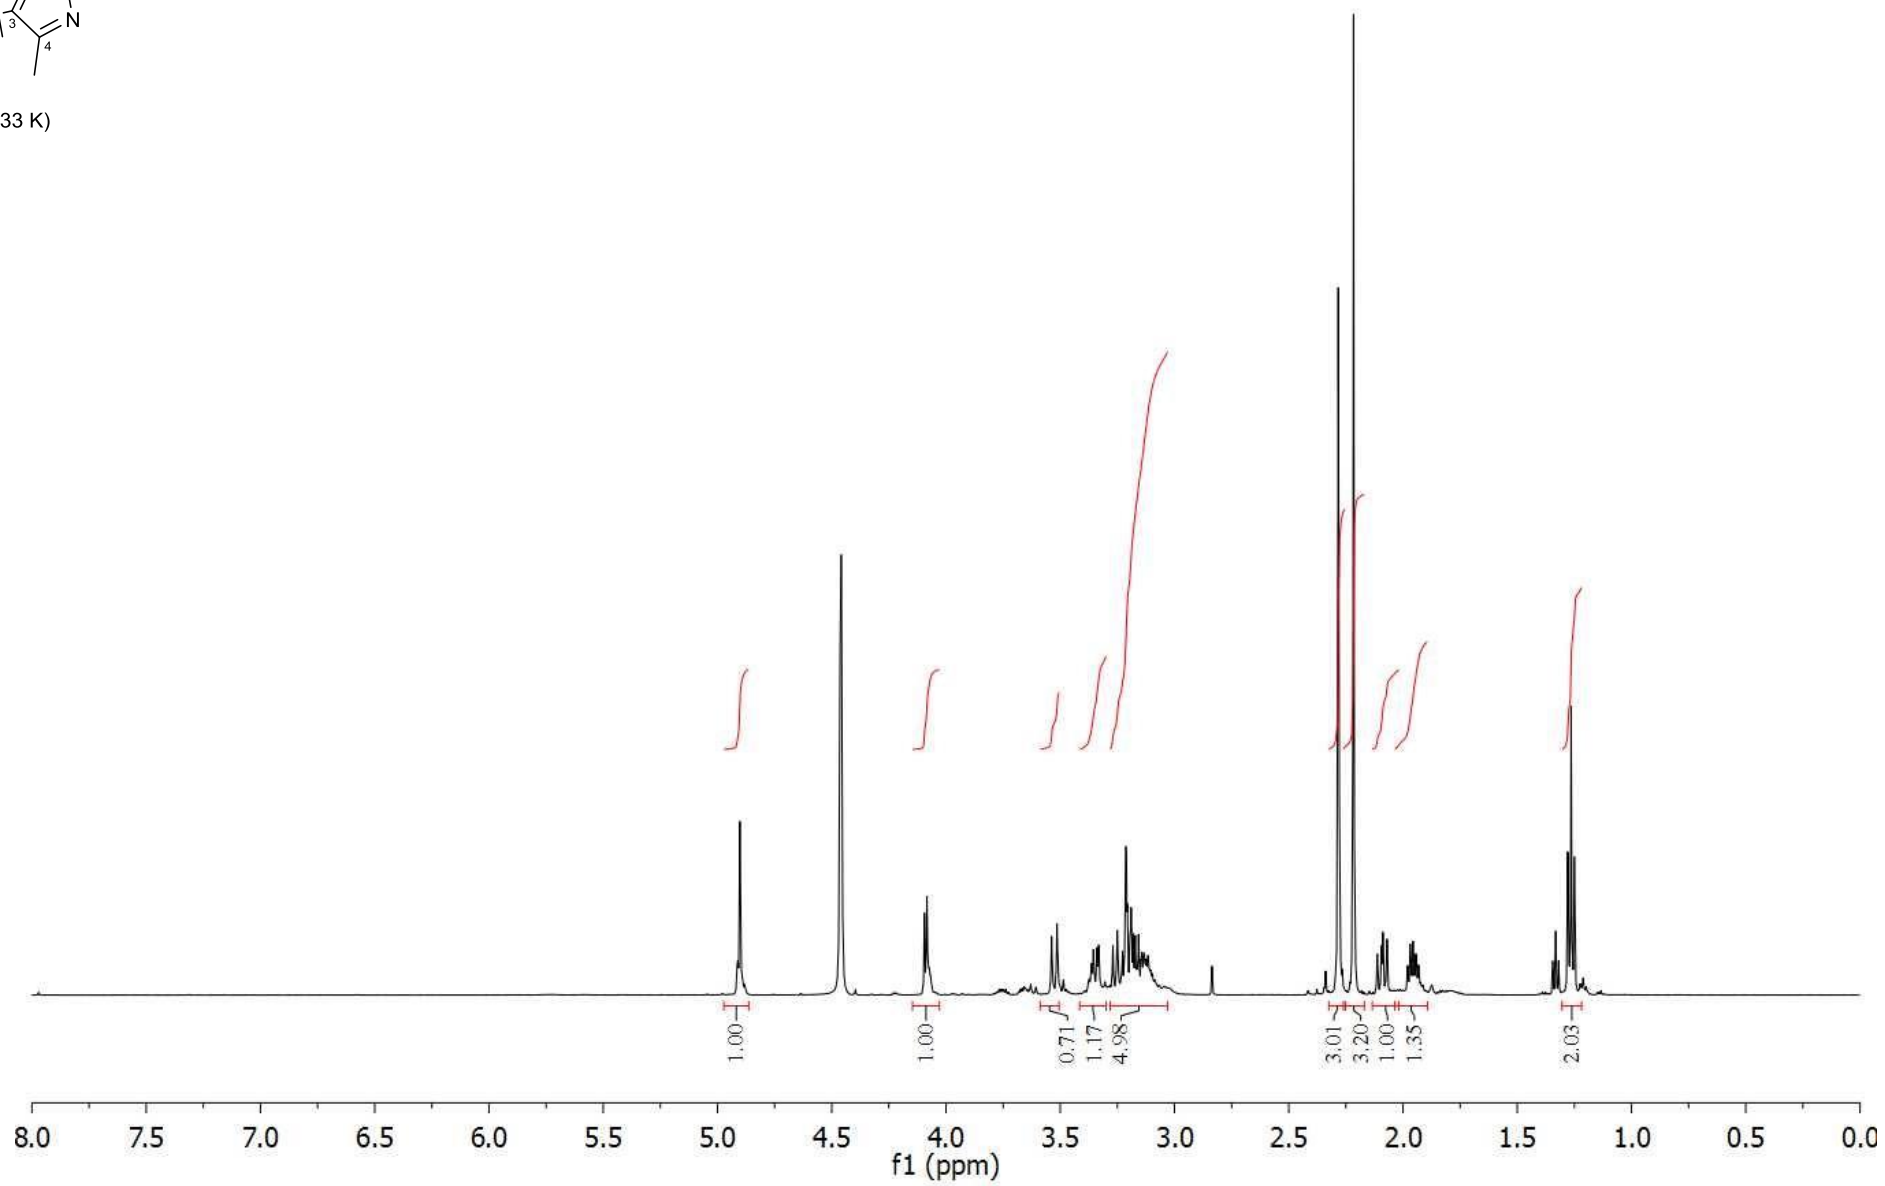

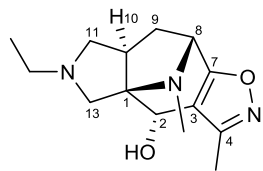

**F21**

(MeOD-d<sub>4</sub> @ 333 K)

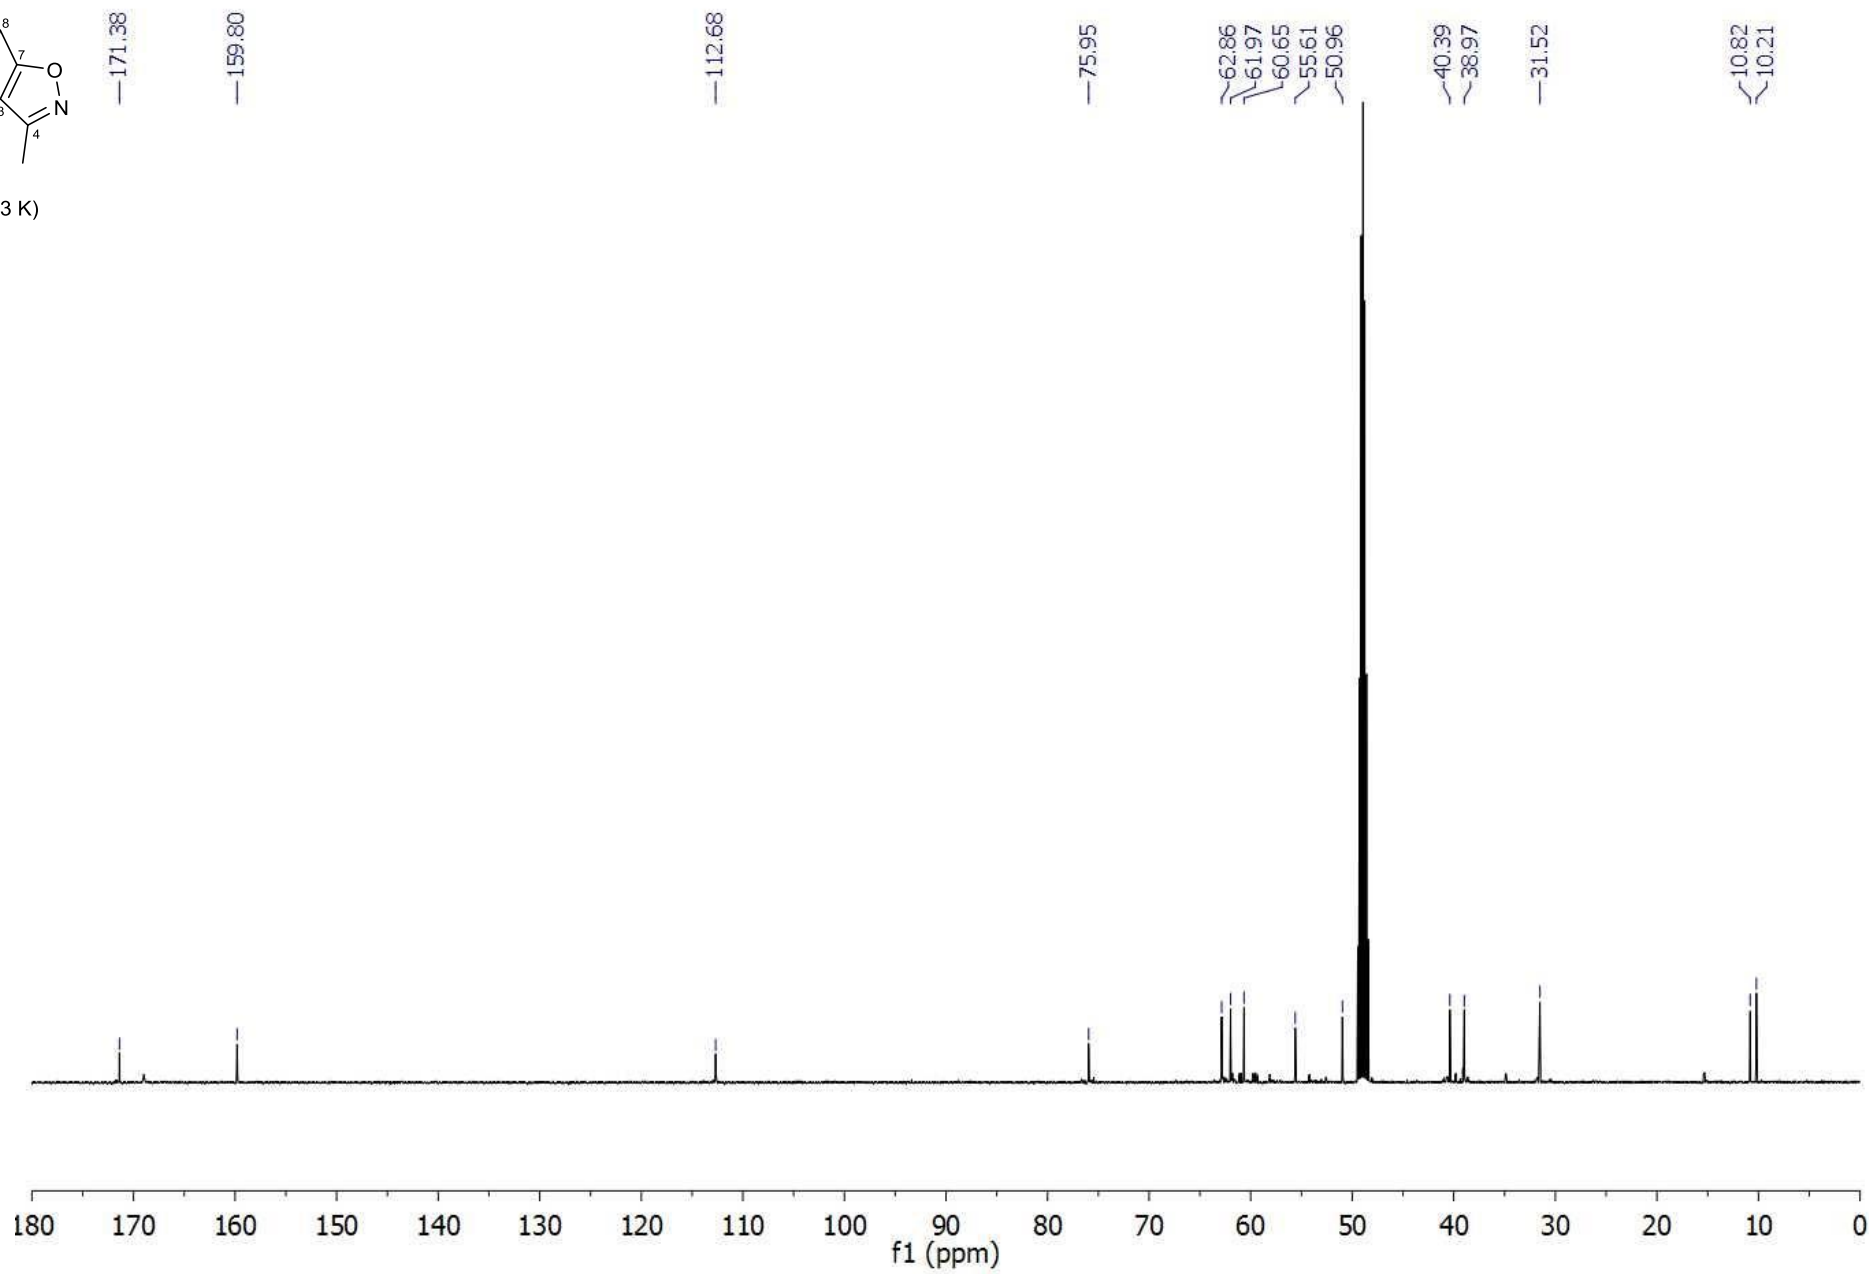



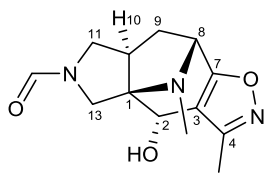

**F22**

(MeOD-d<sub>4</sub> @ 333 K)

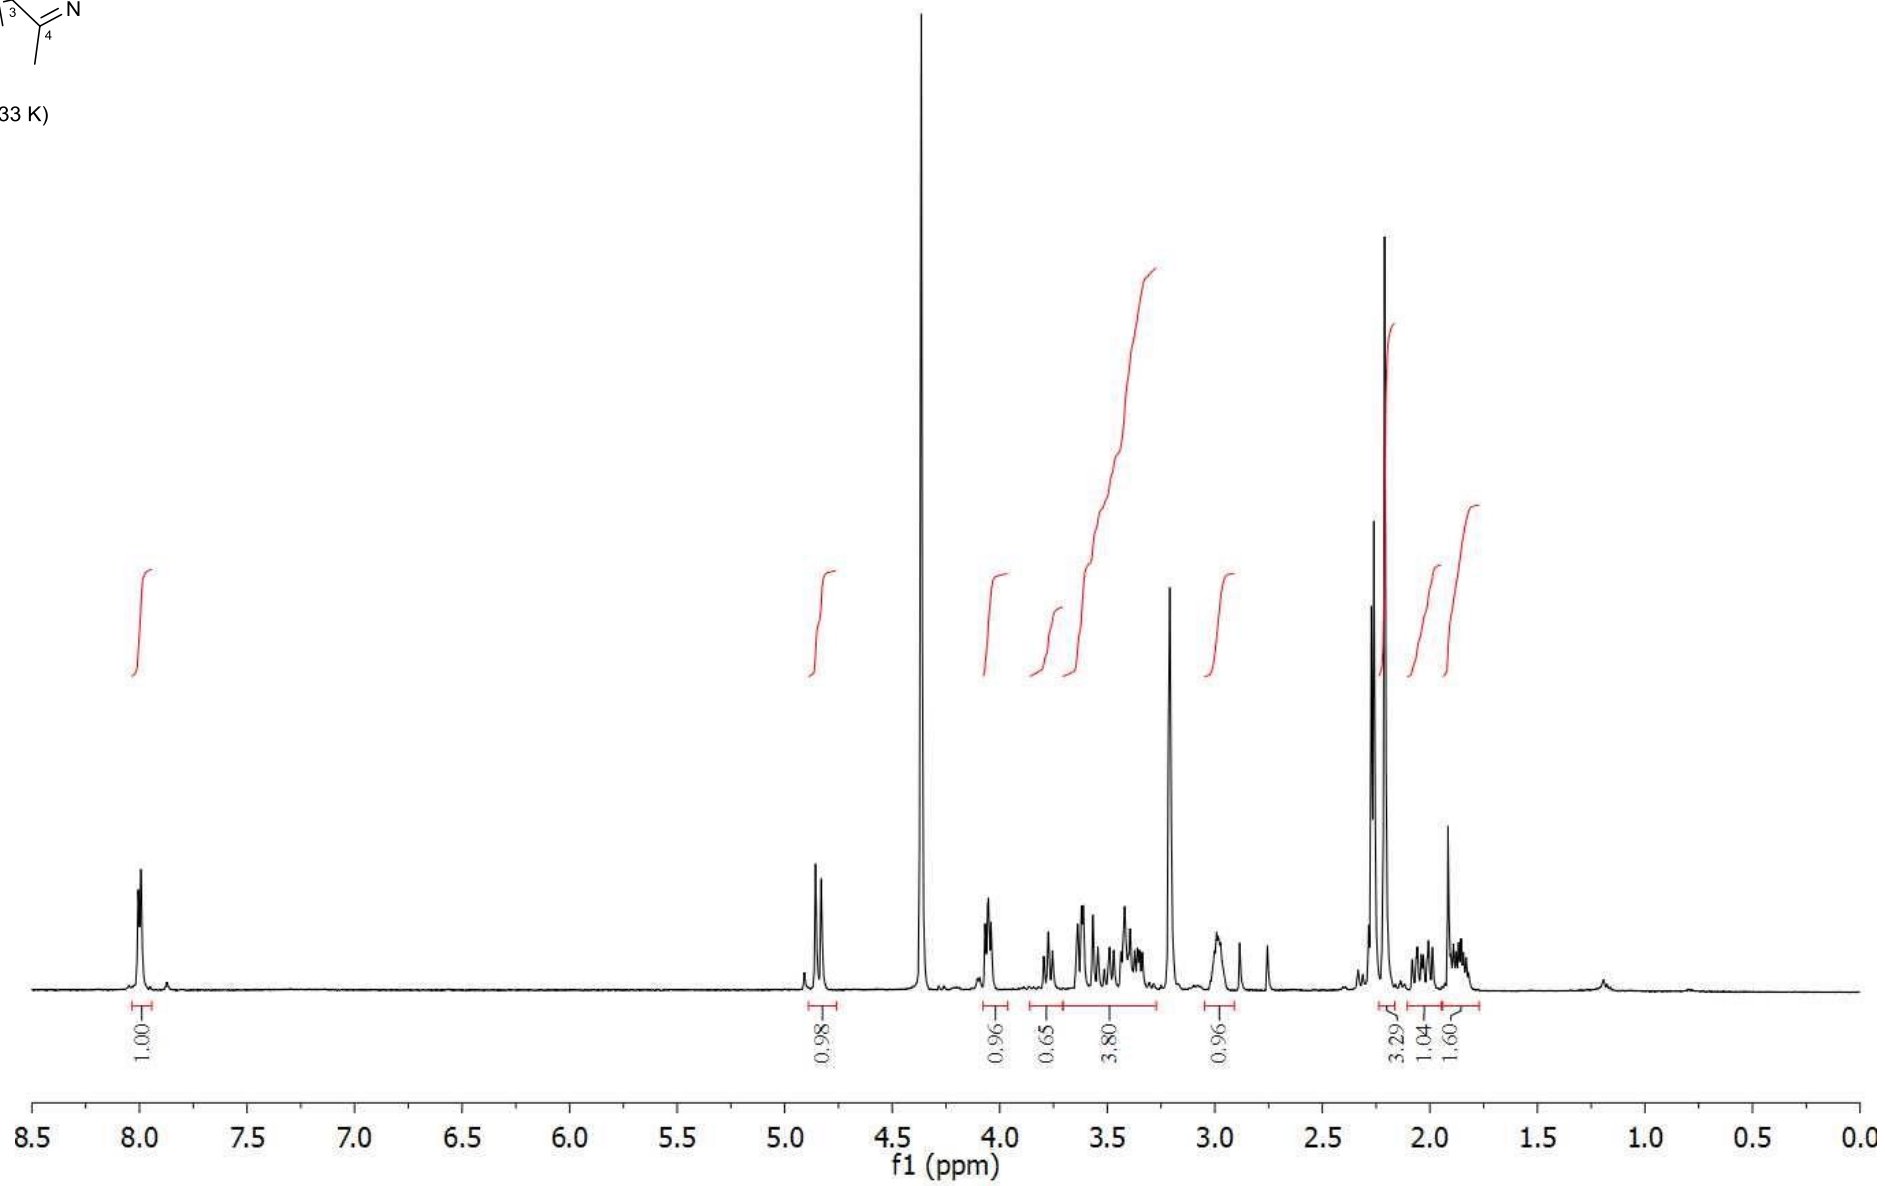

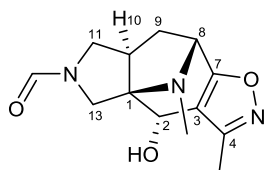

**F22**  
(MeOD-d<sub>4</sub> @ 333 K)

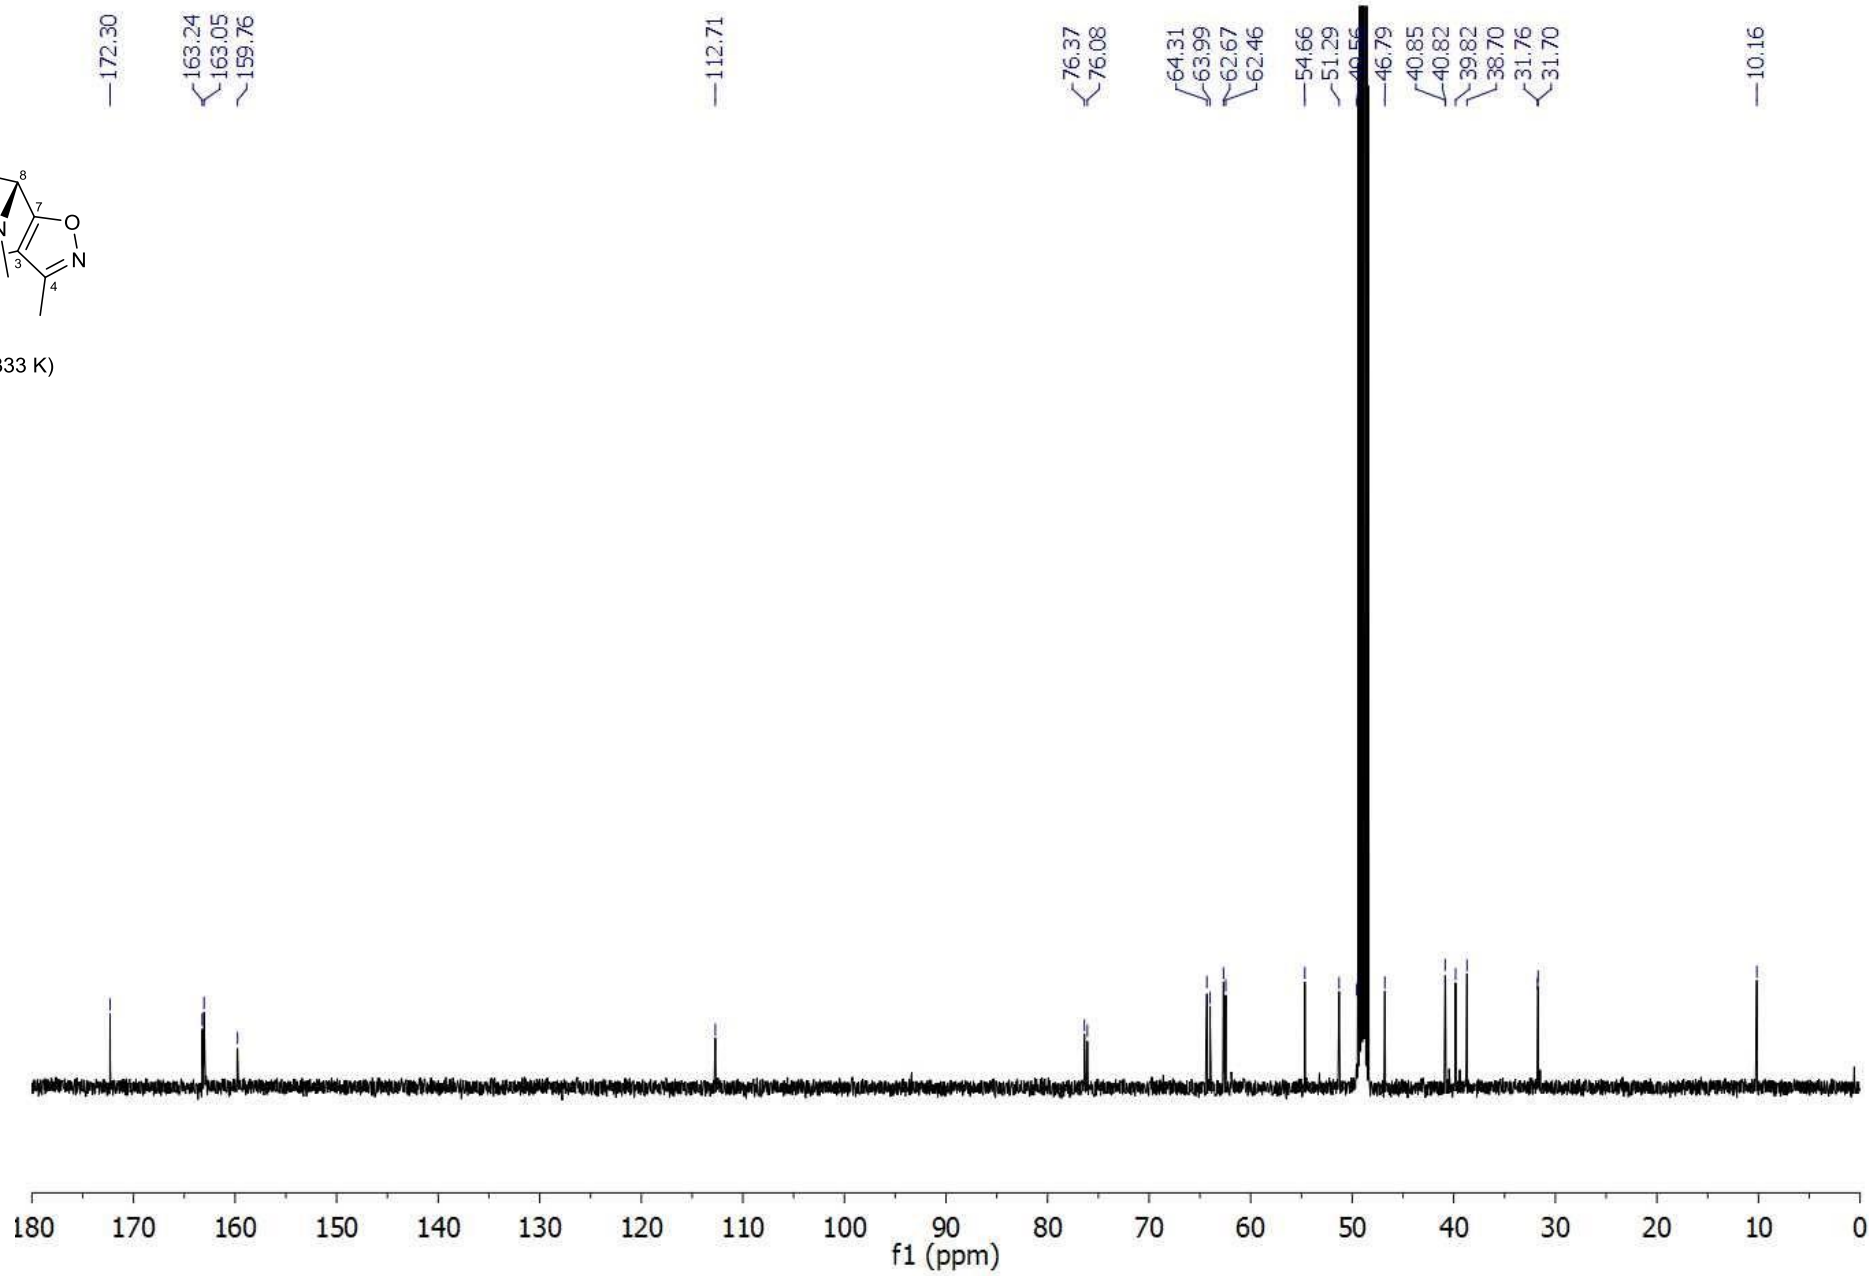

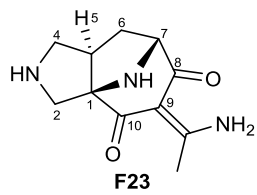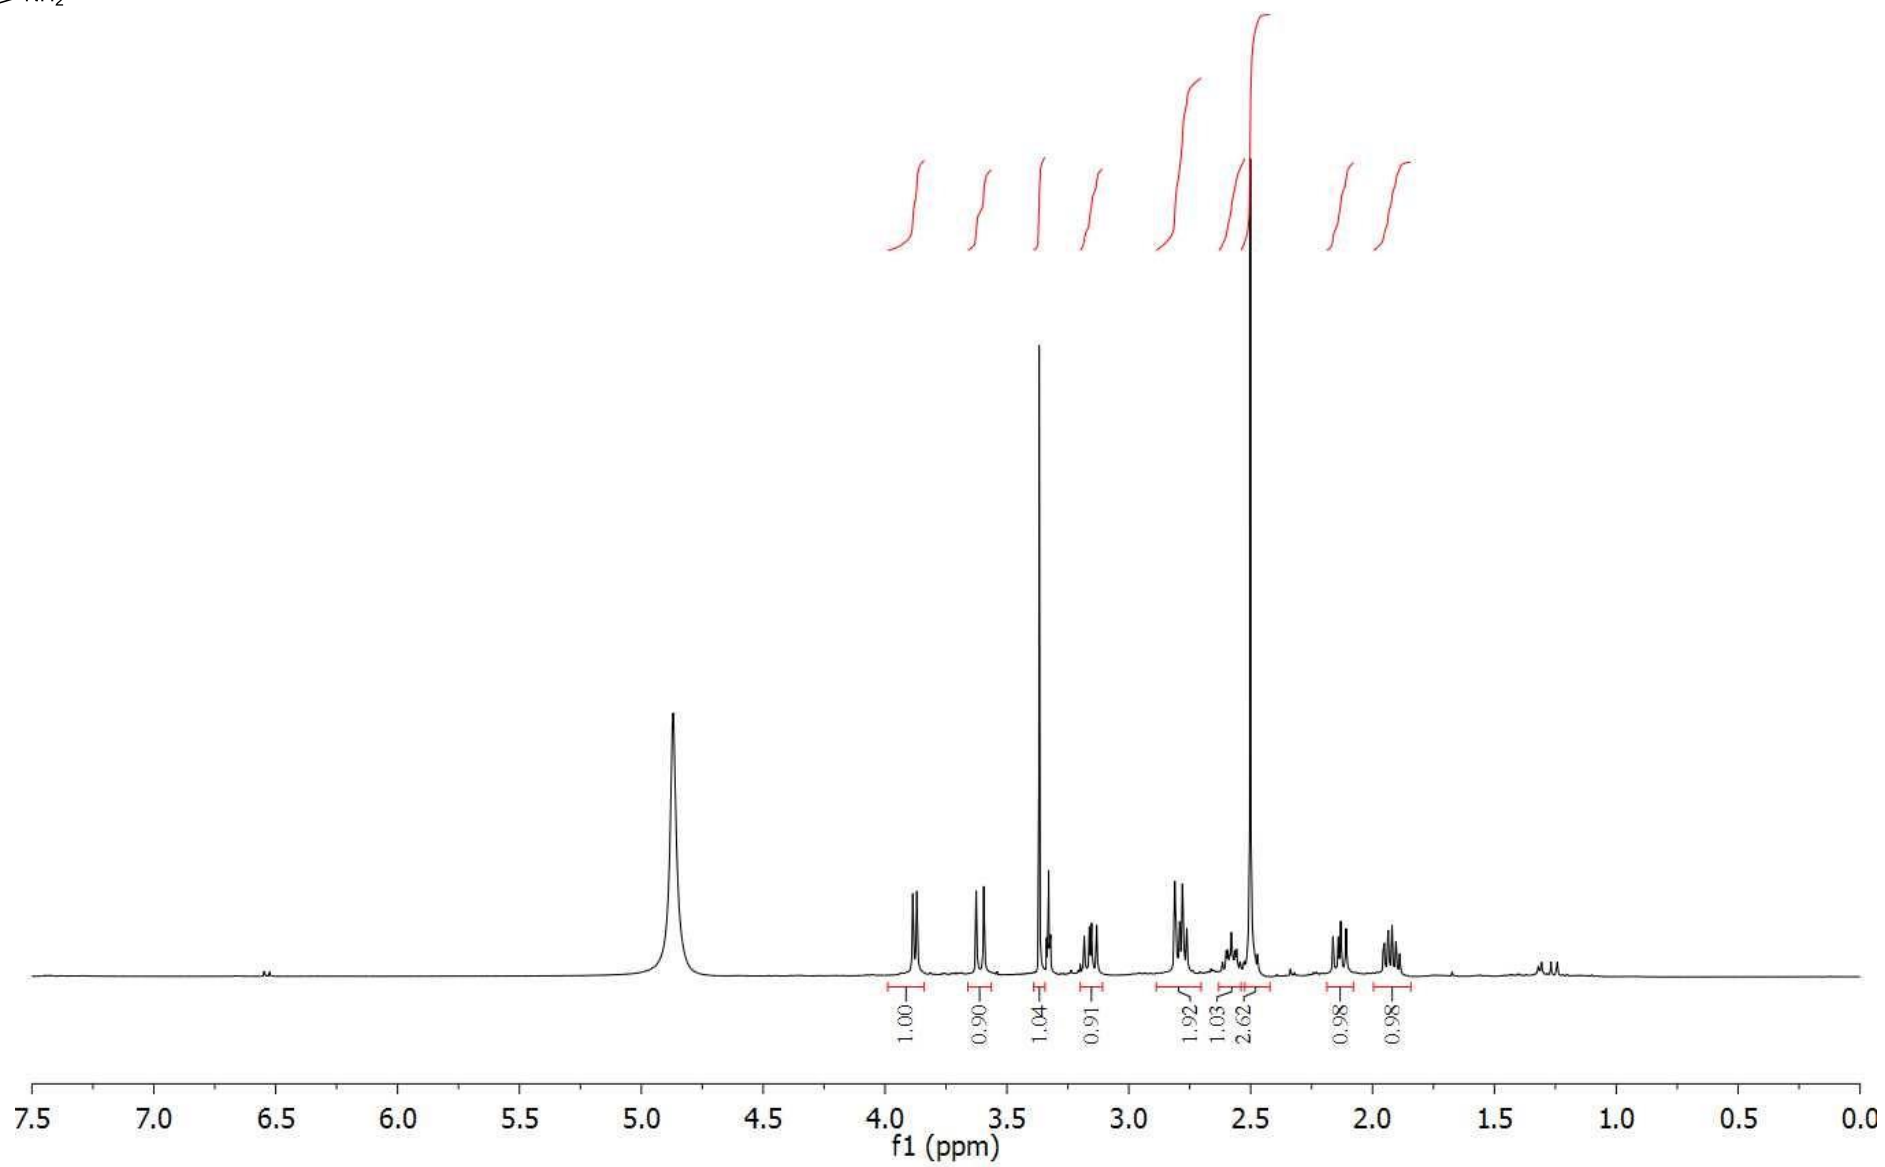

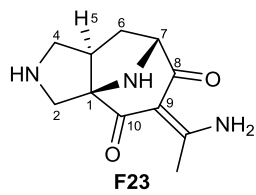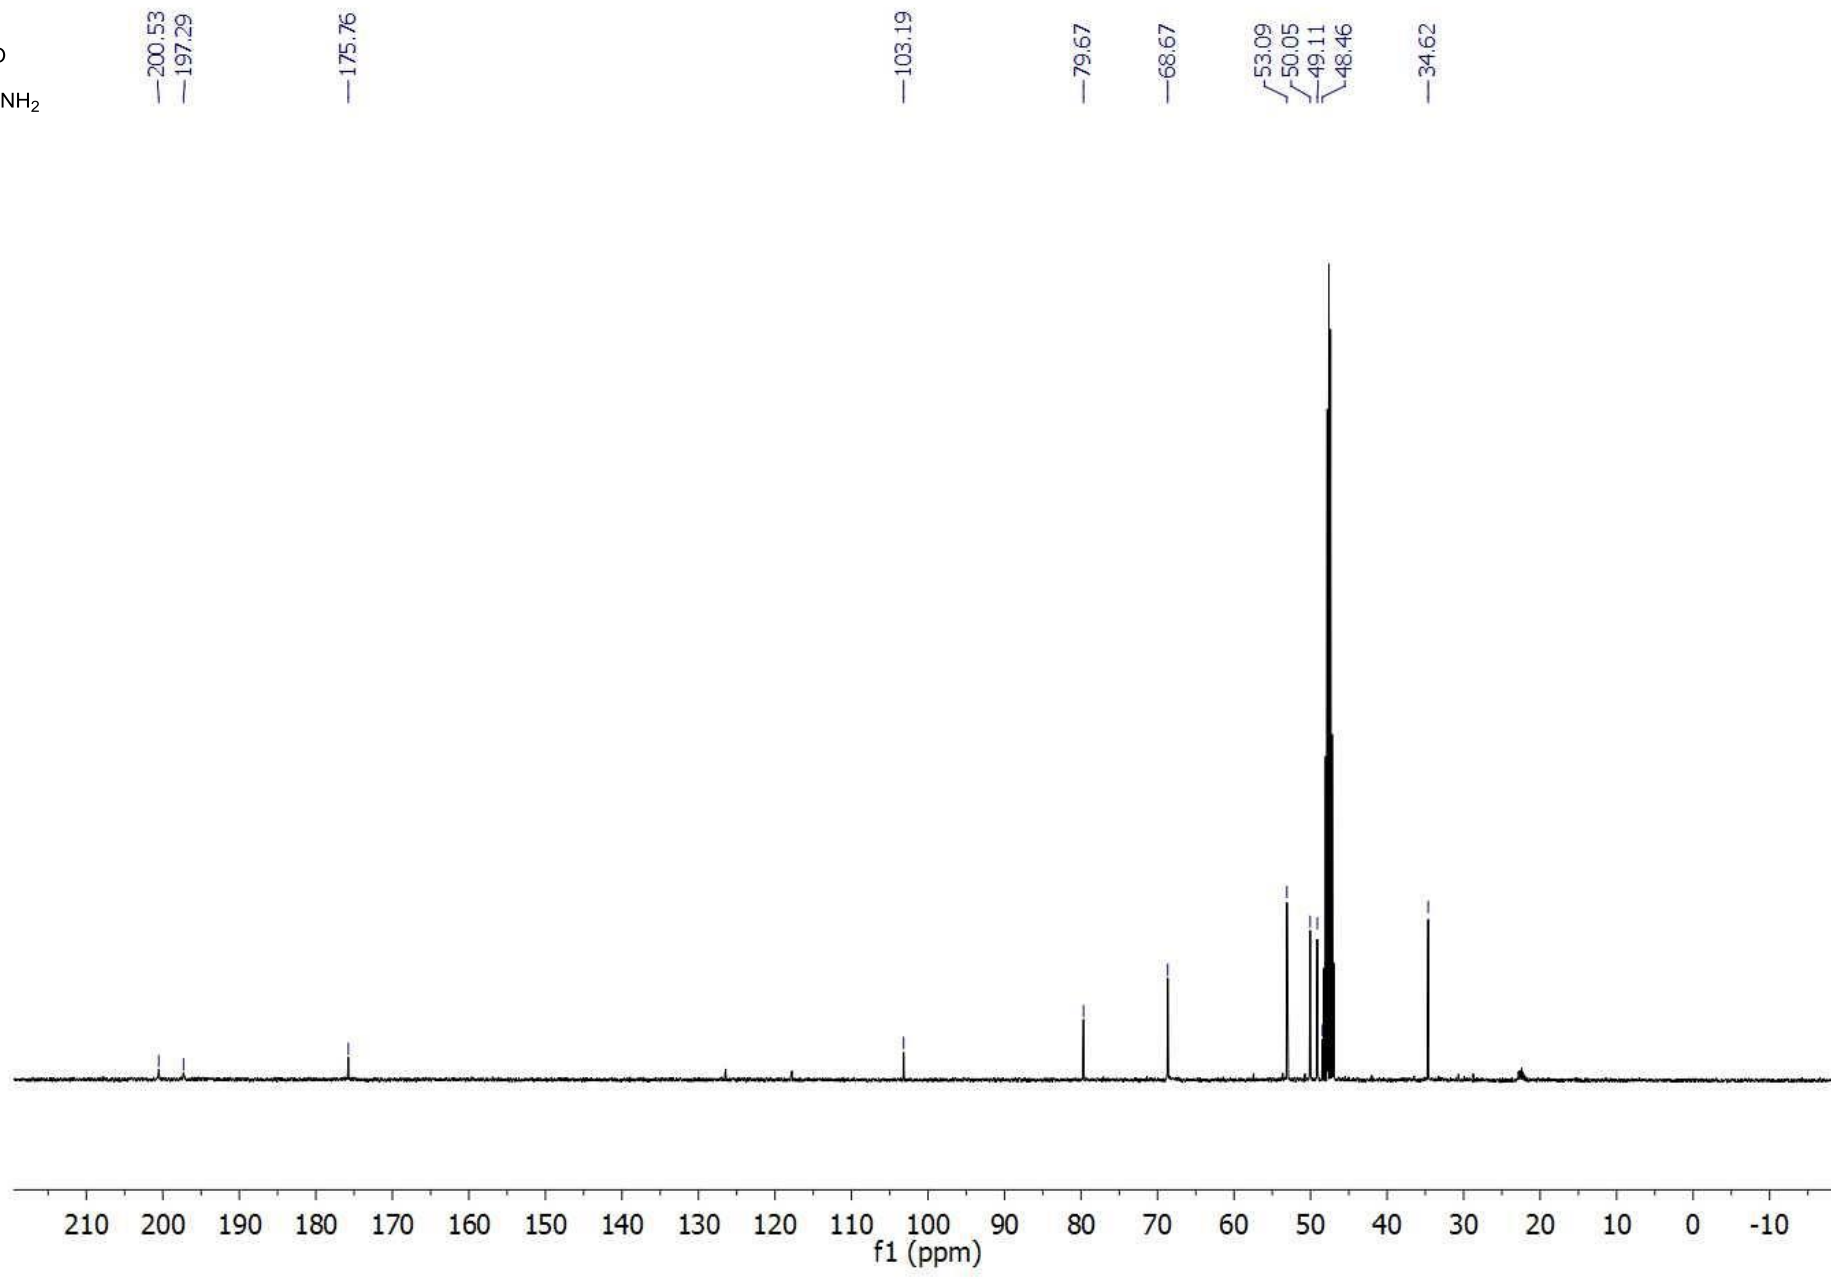

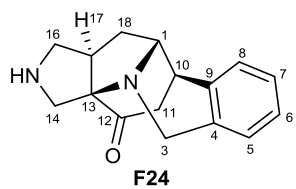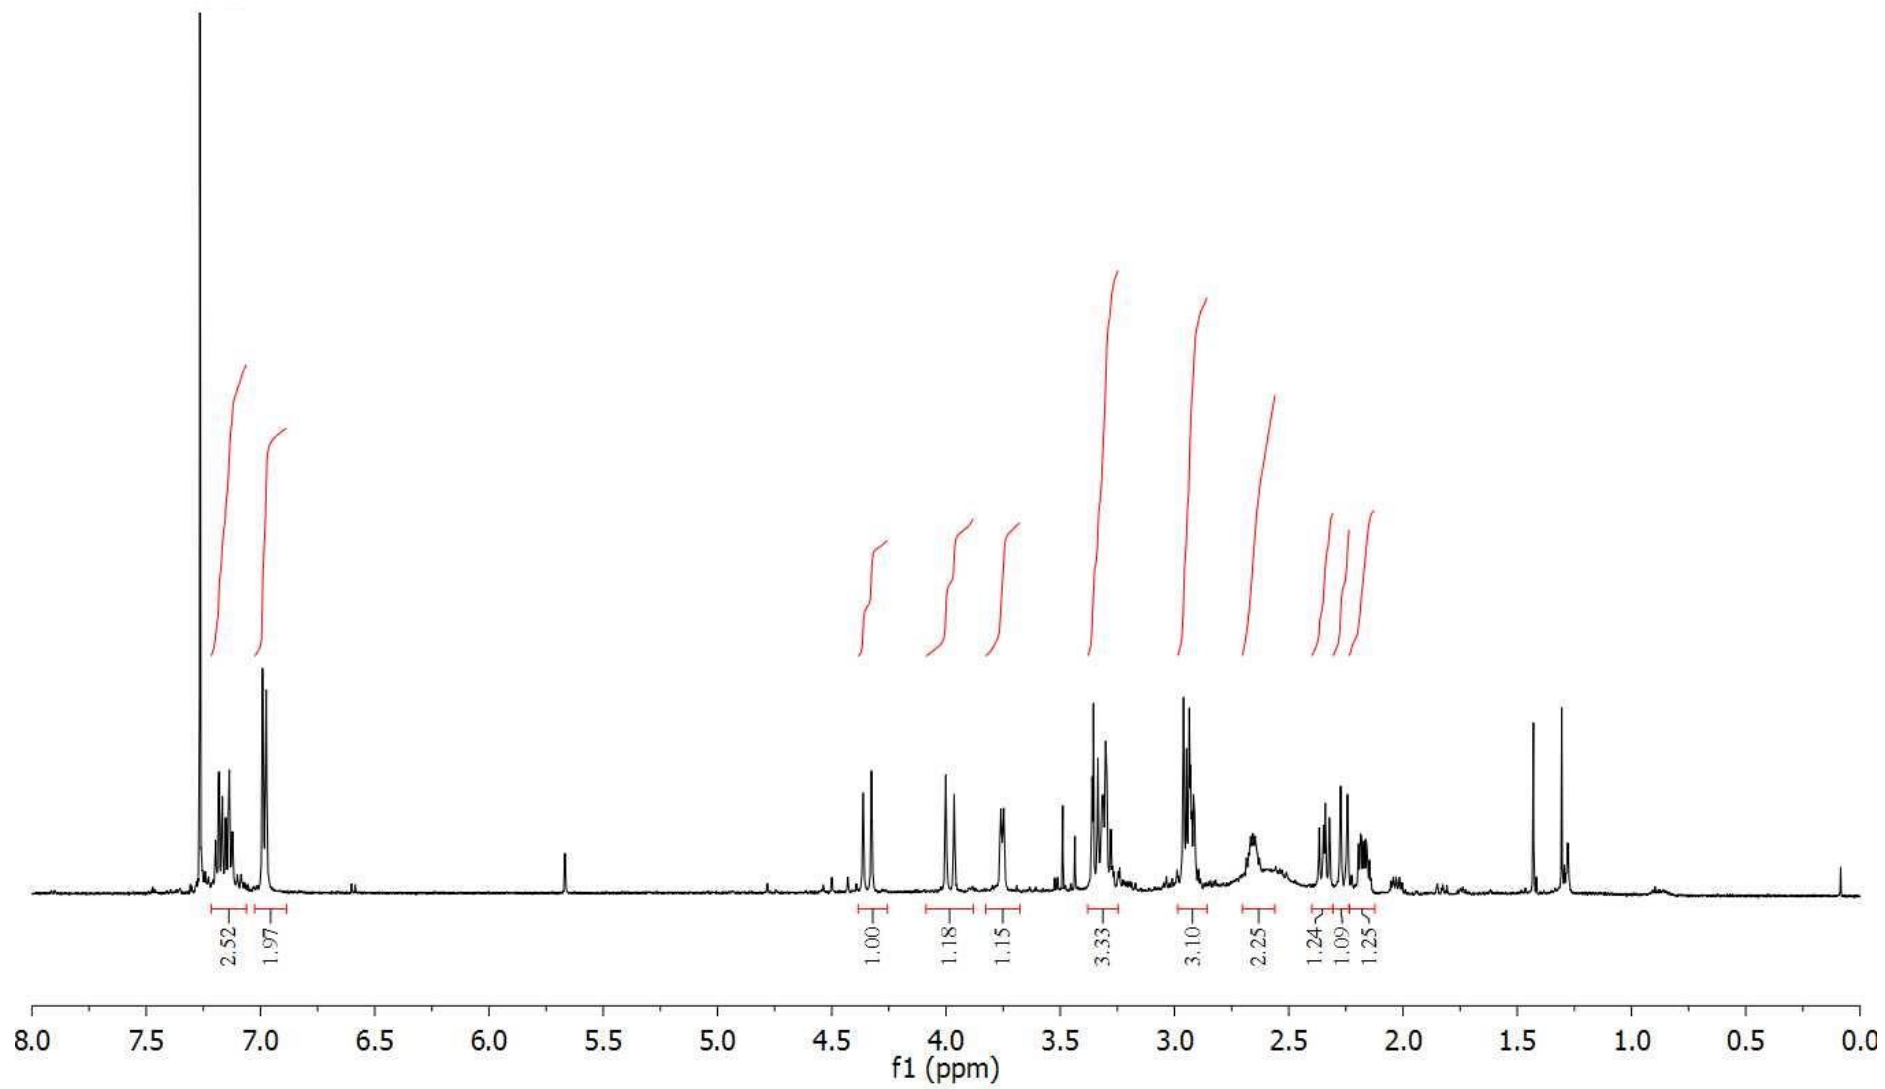

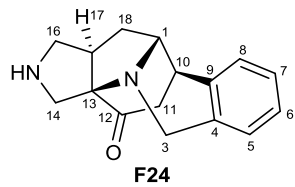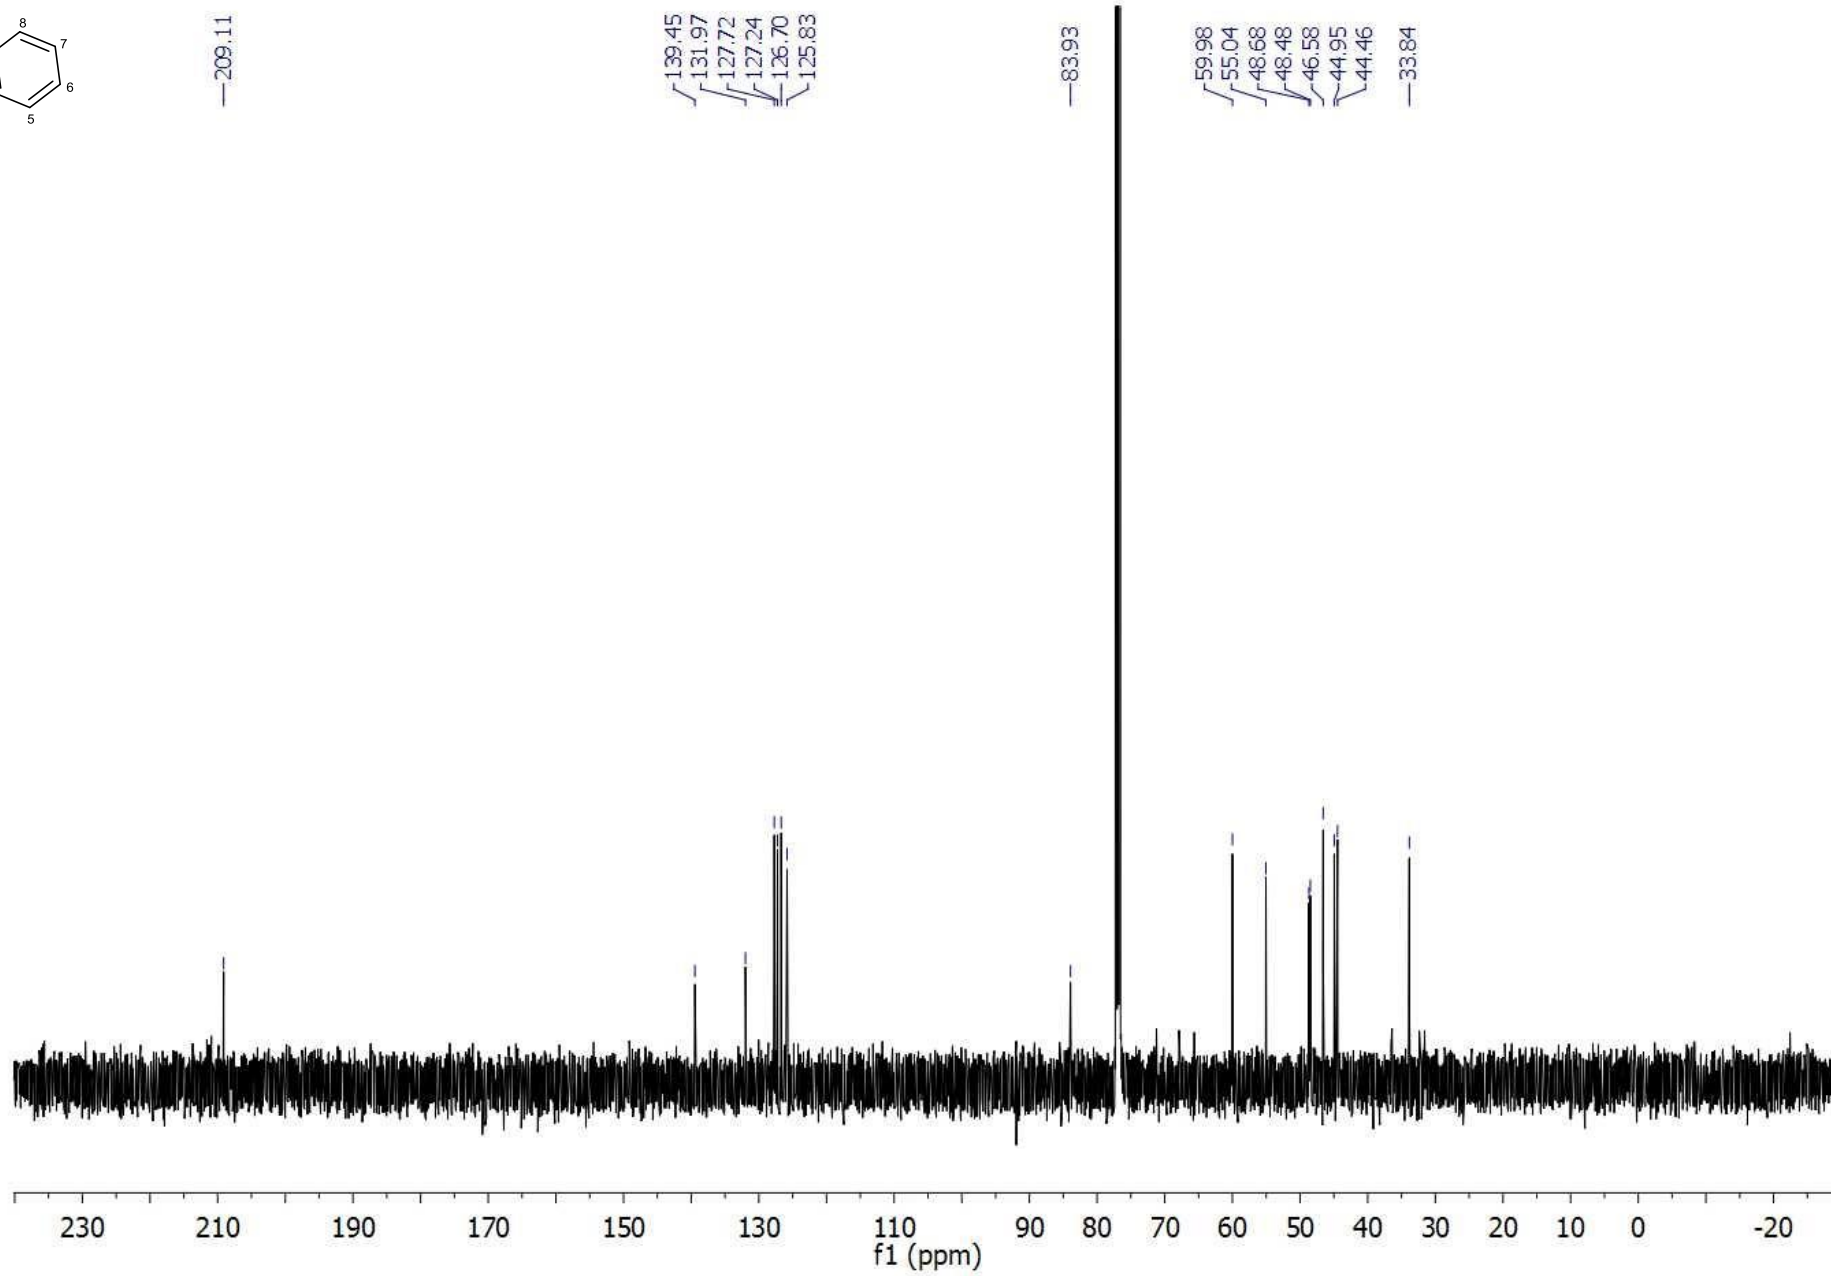

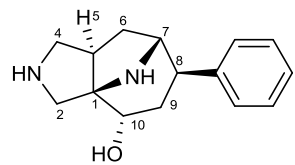

**F25**  
(MeOD-d<sub>4</sub> @ 333 K)

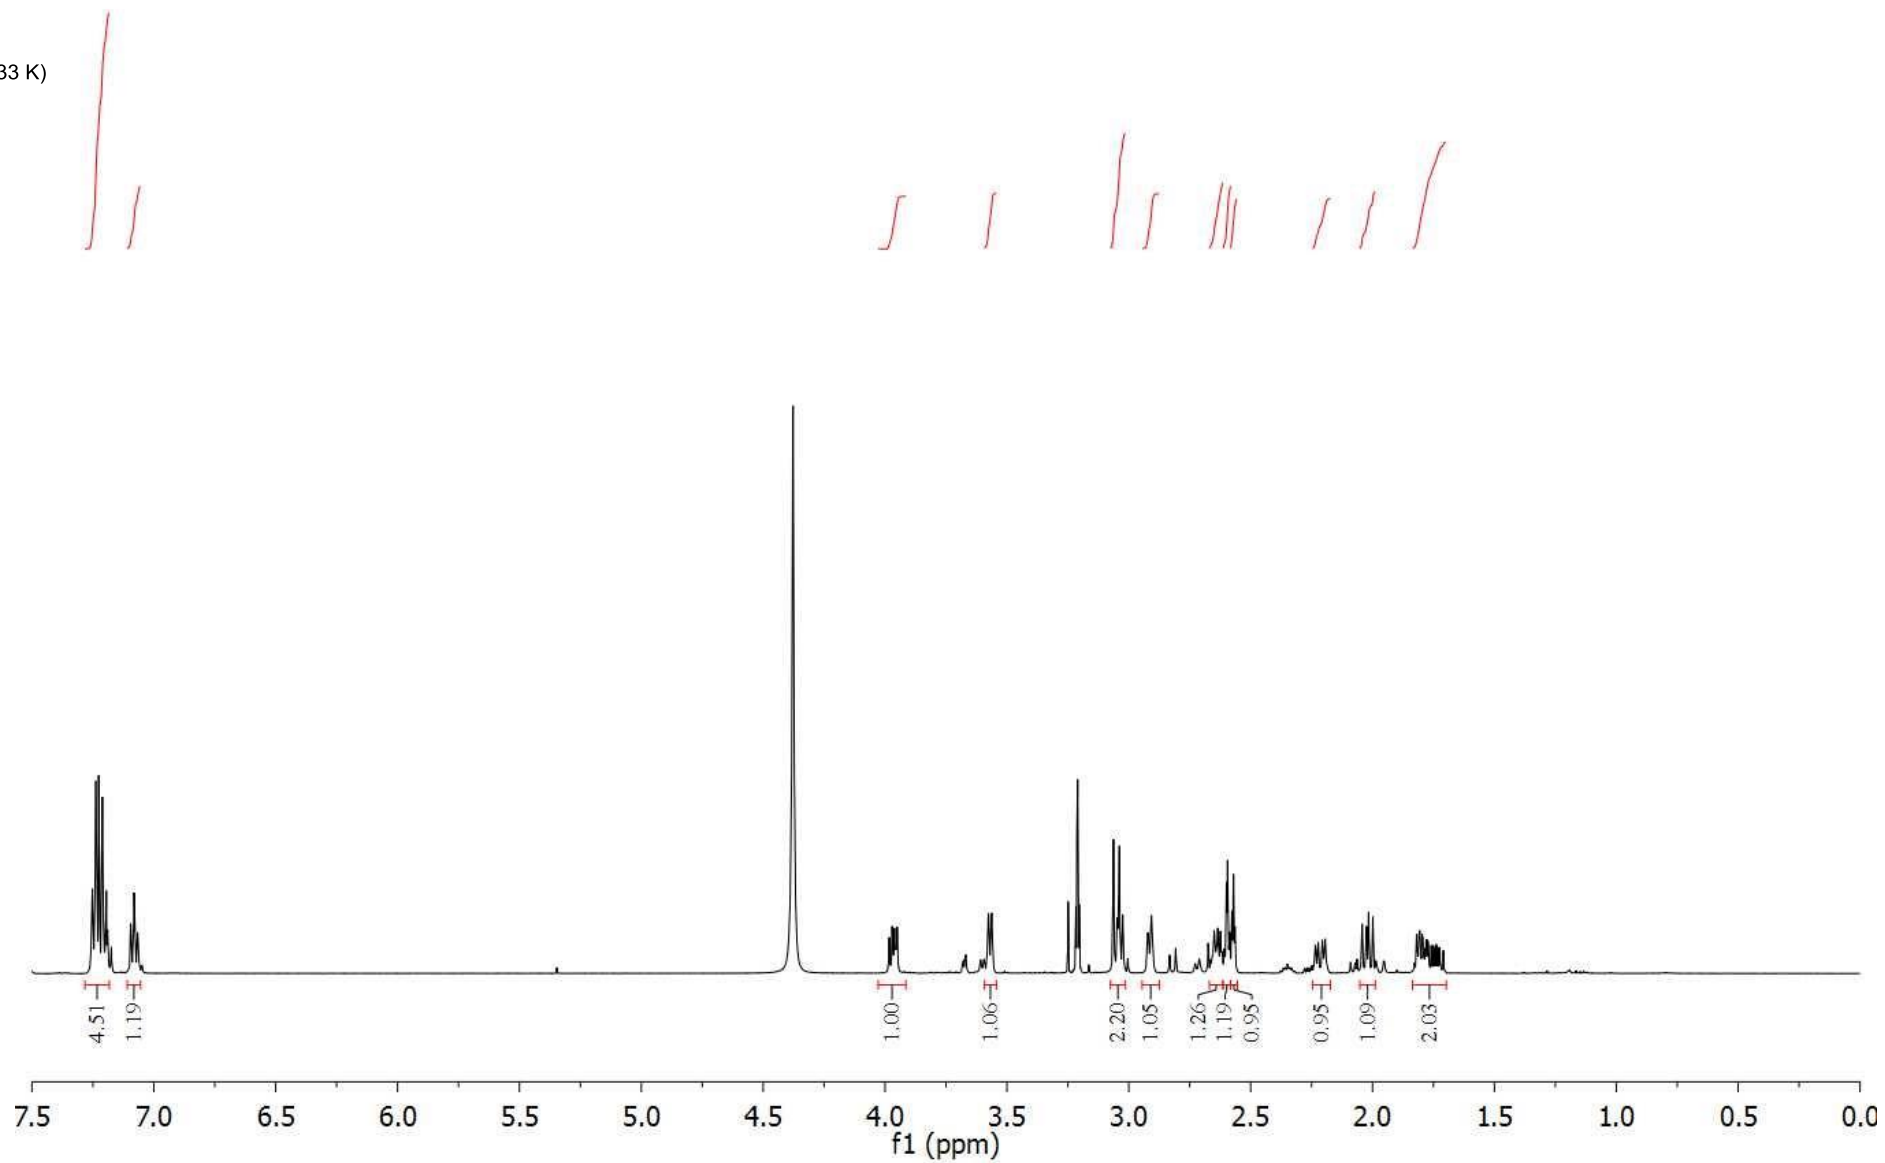

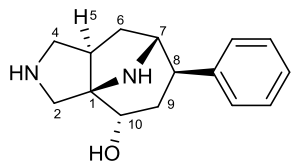

**F25**

(MeOD-d<sub>4</sub> @ 333 K)

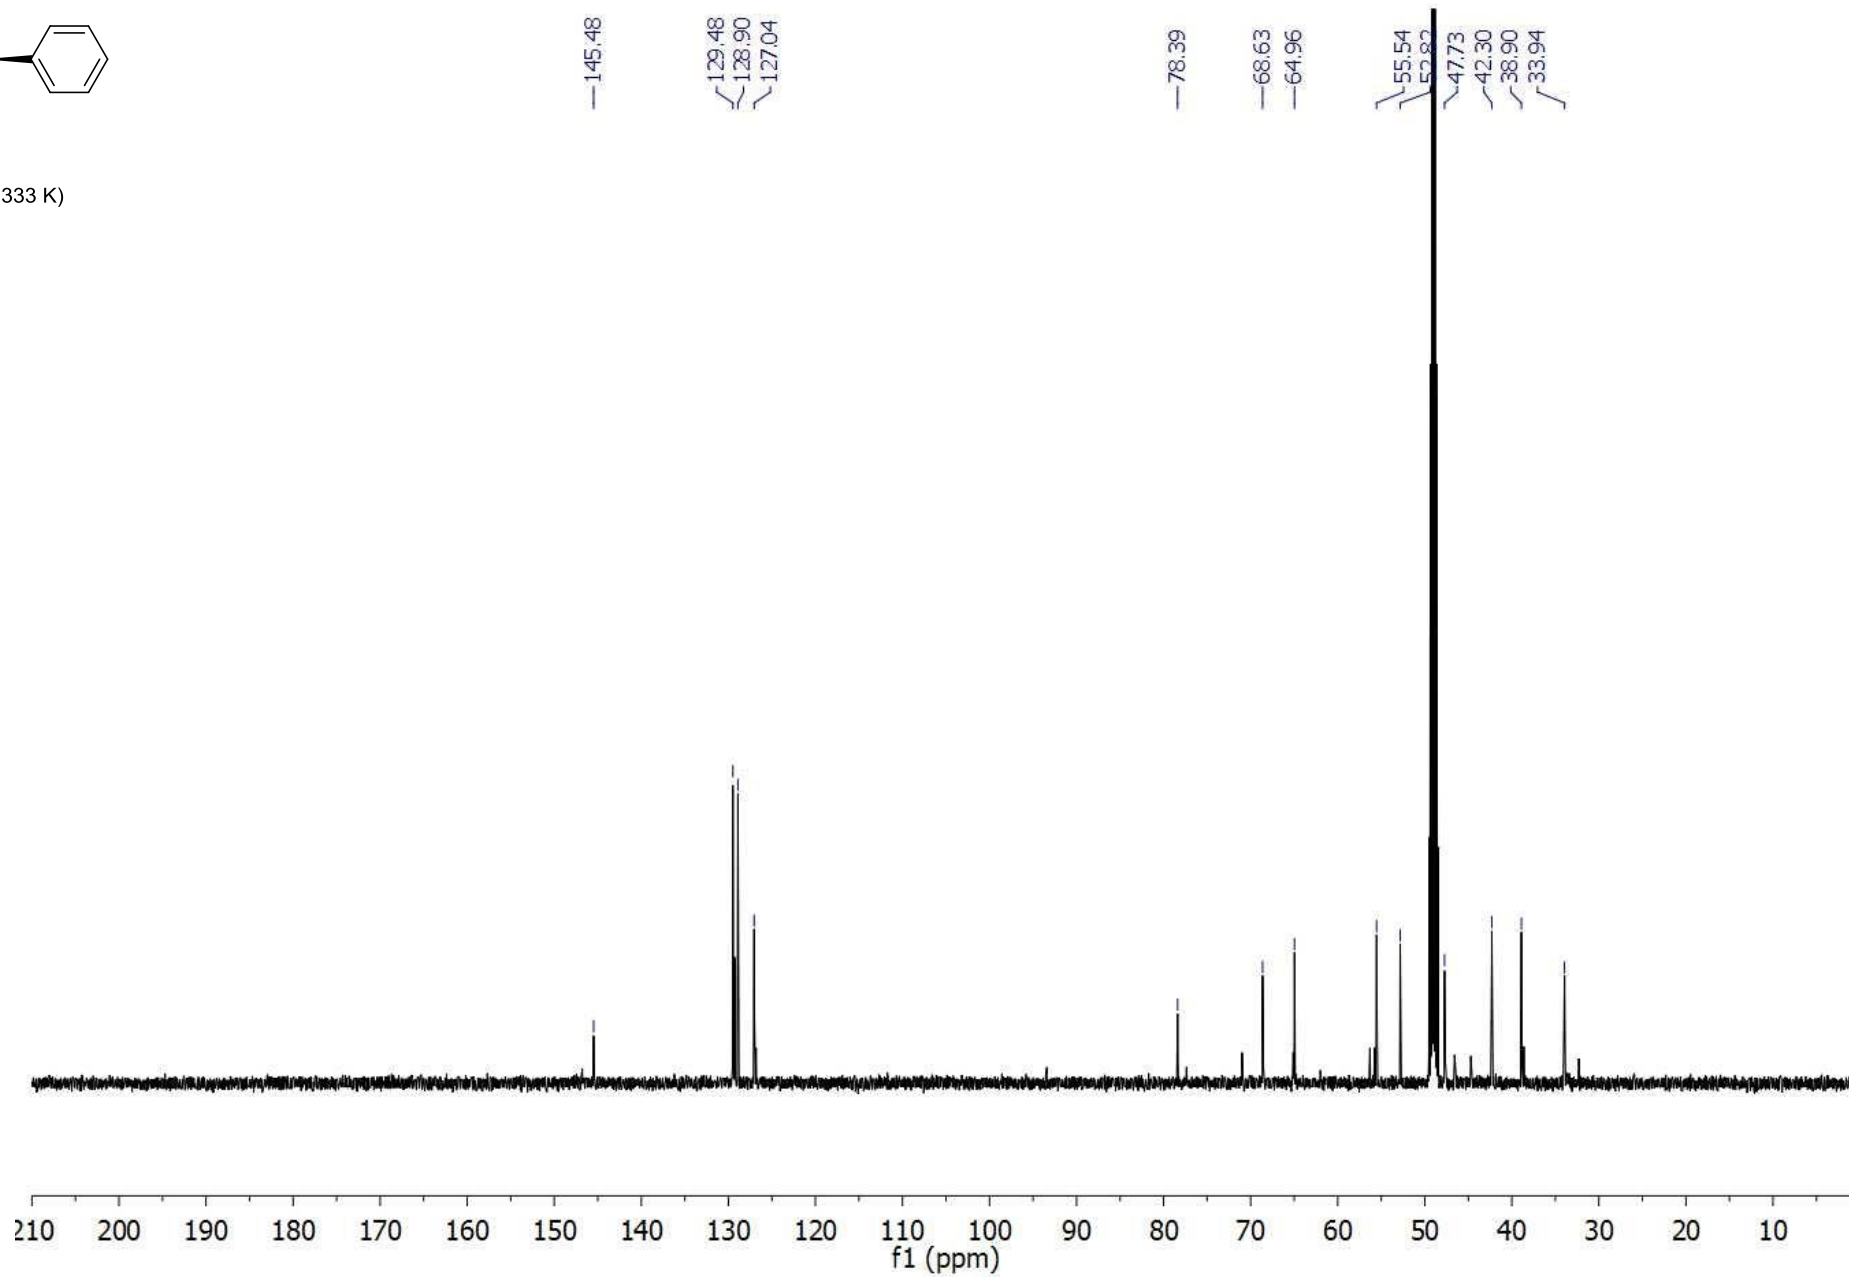



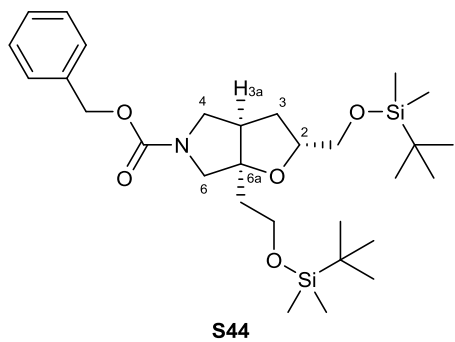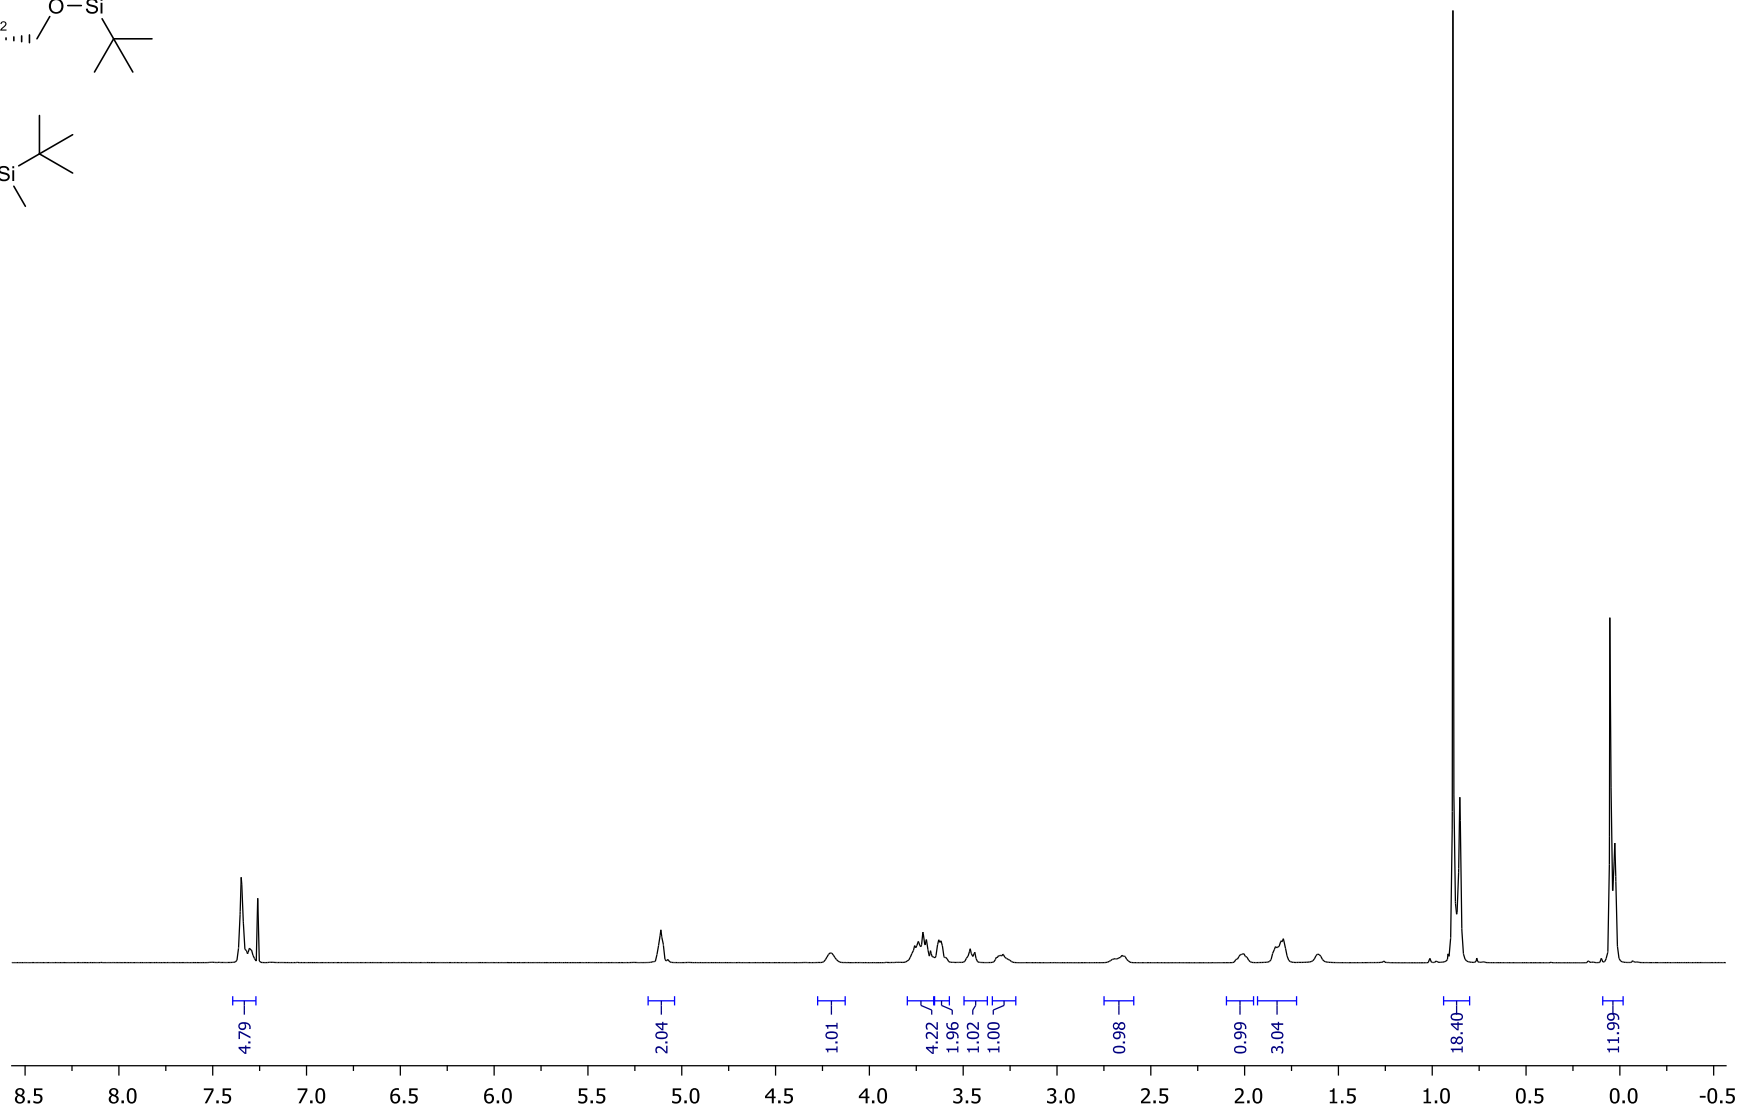

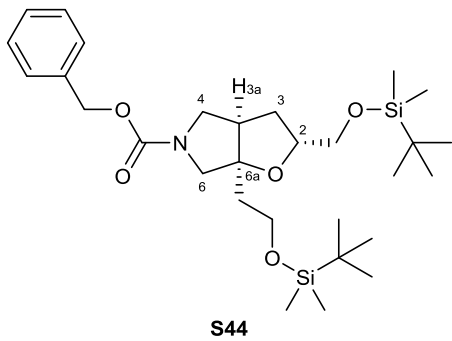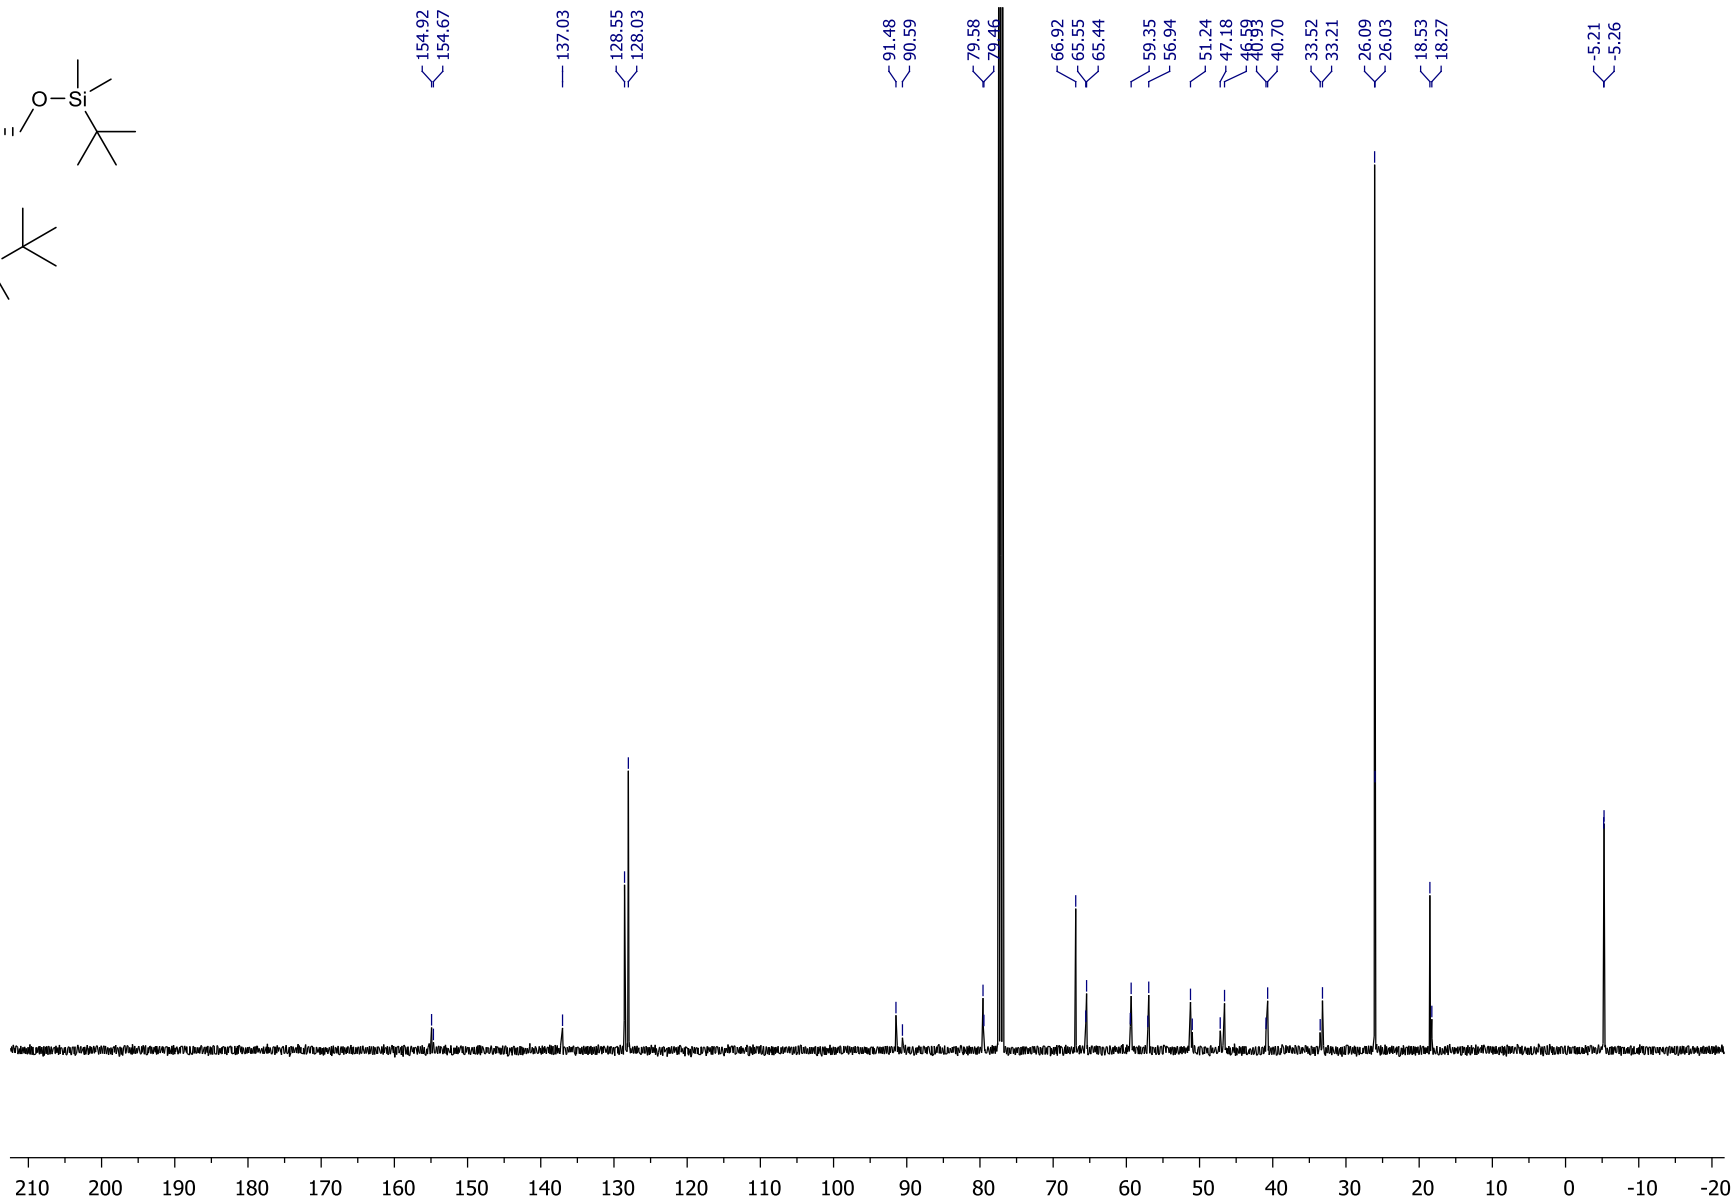



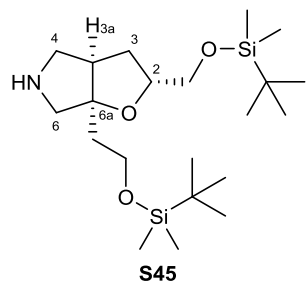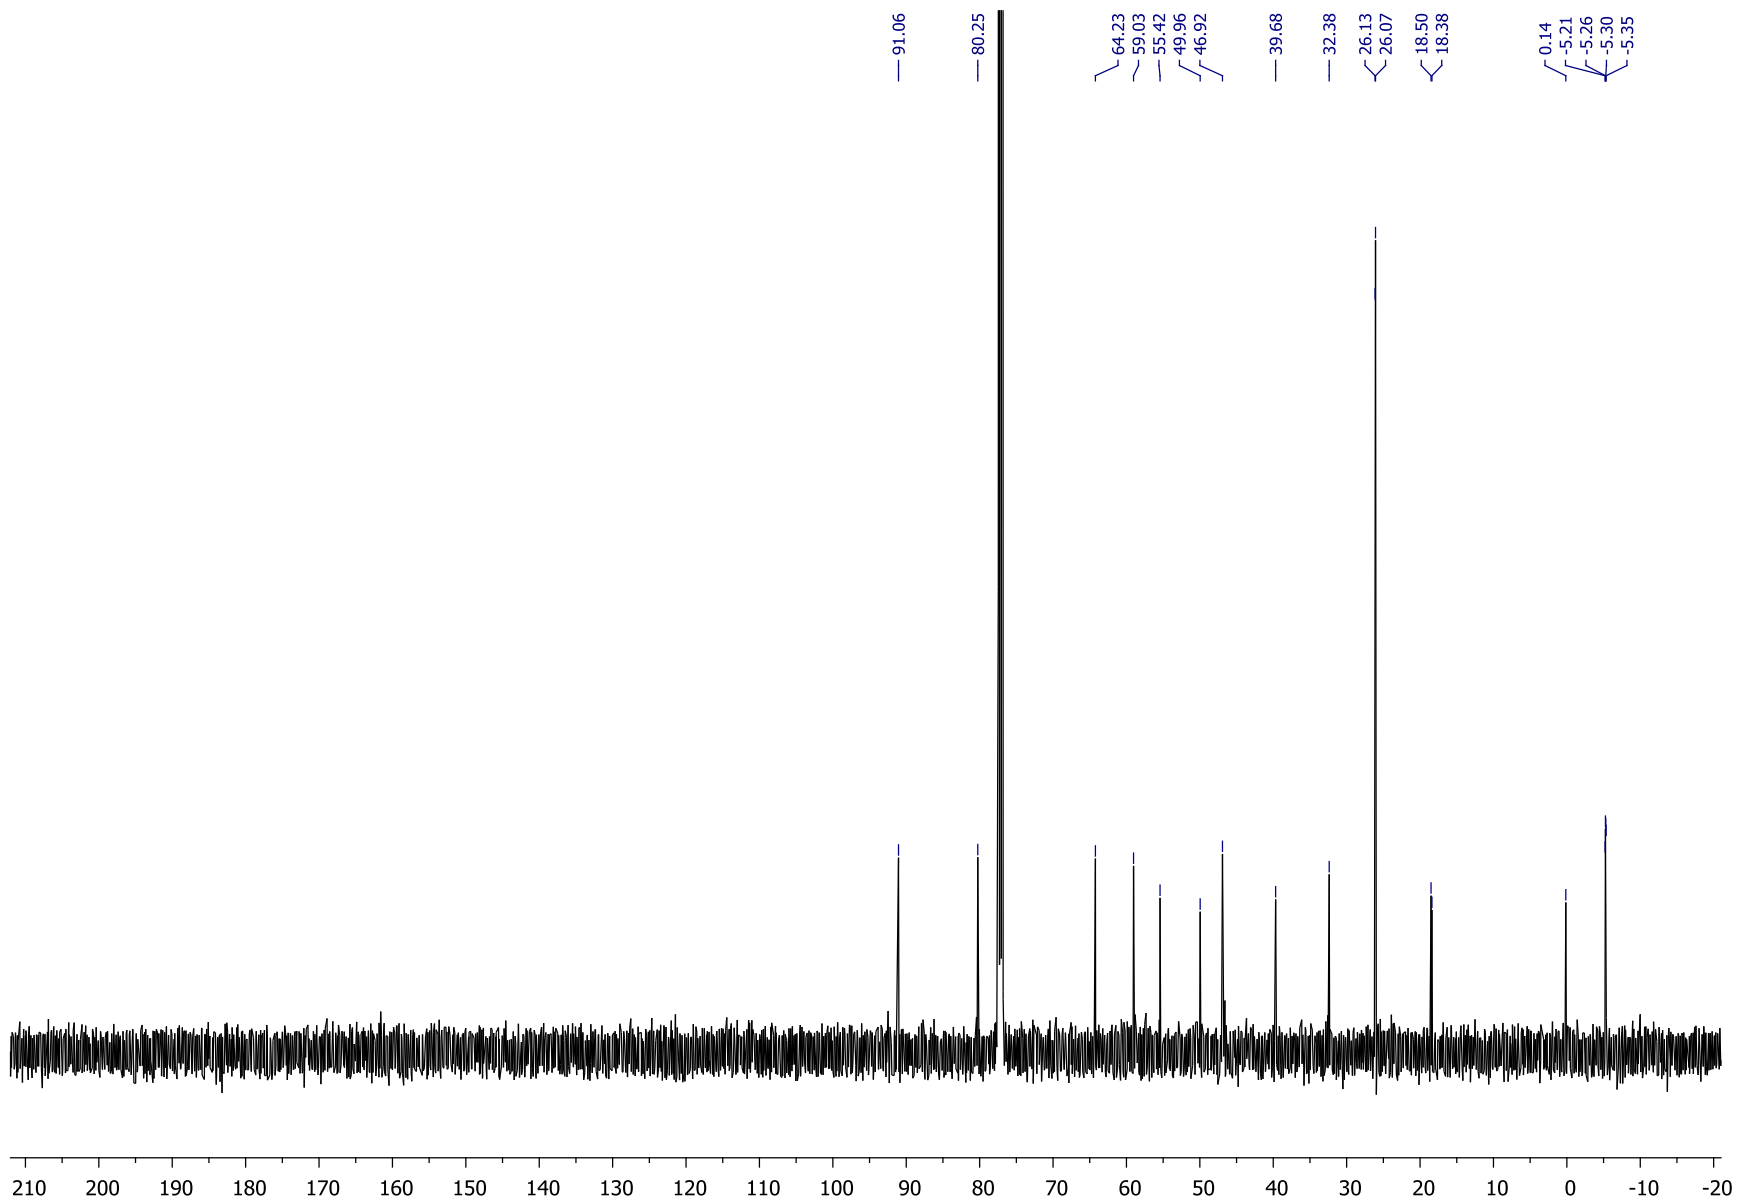

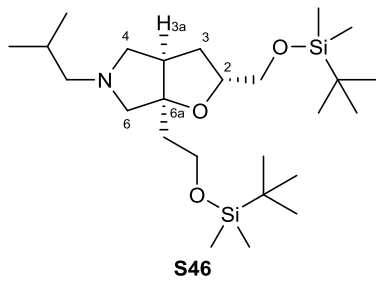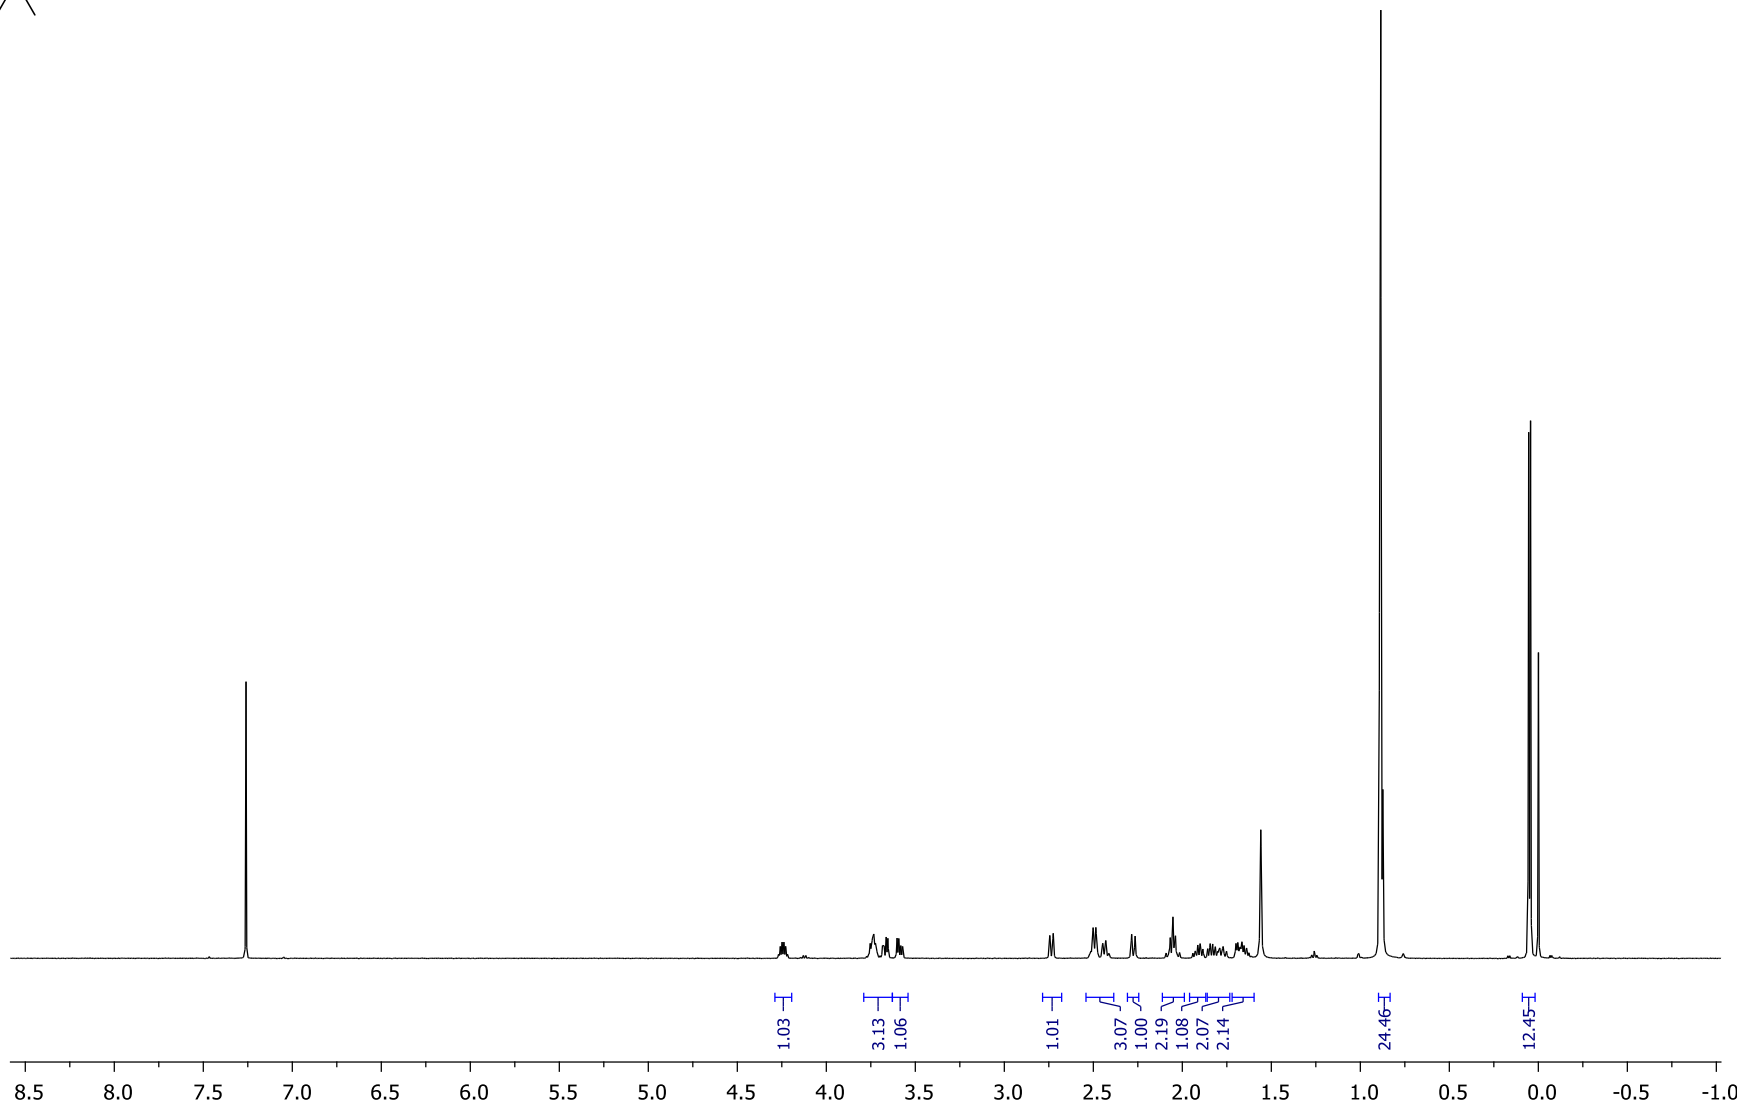

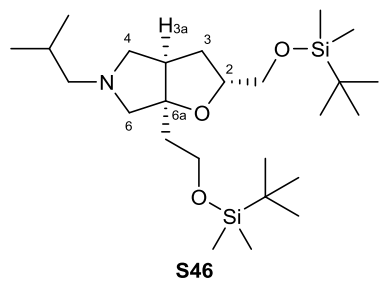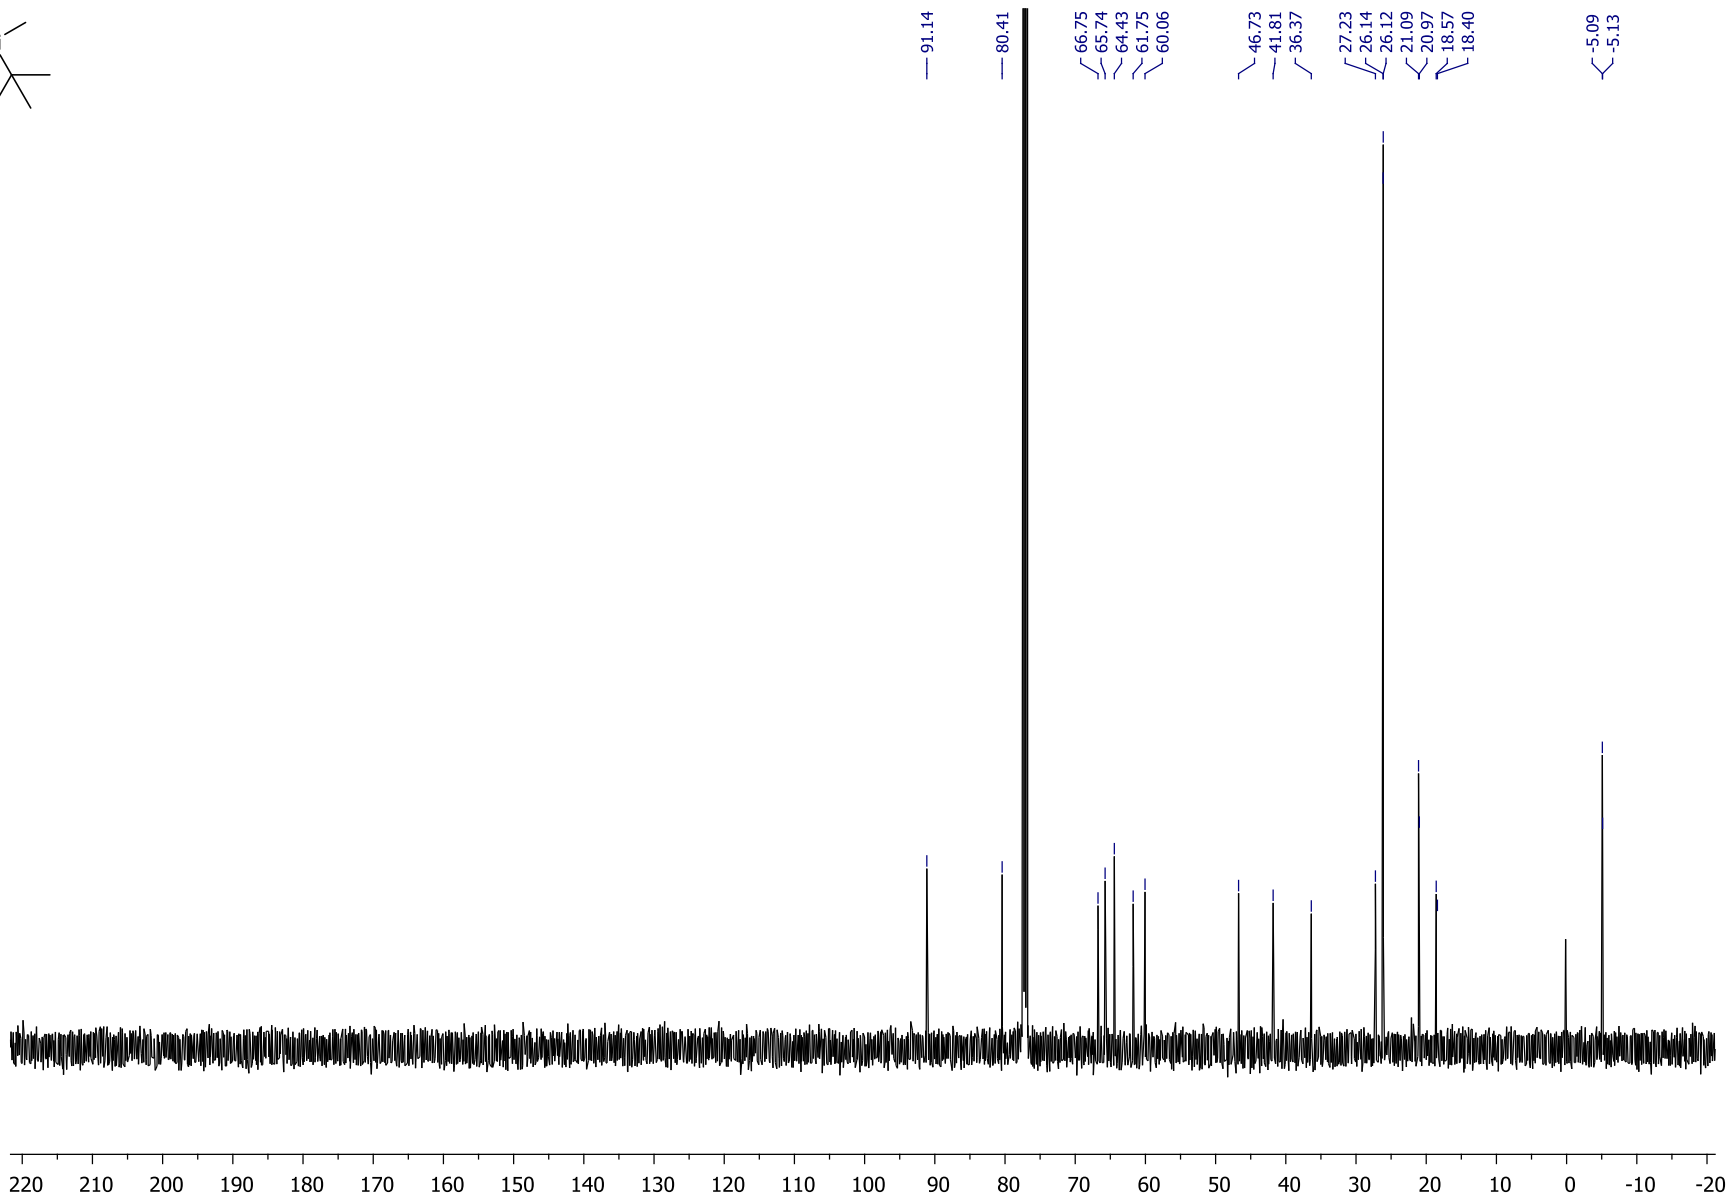

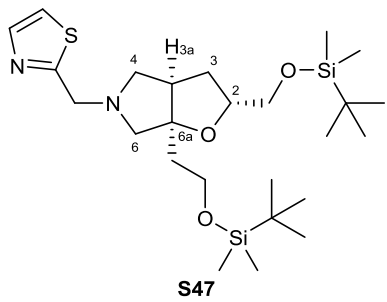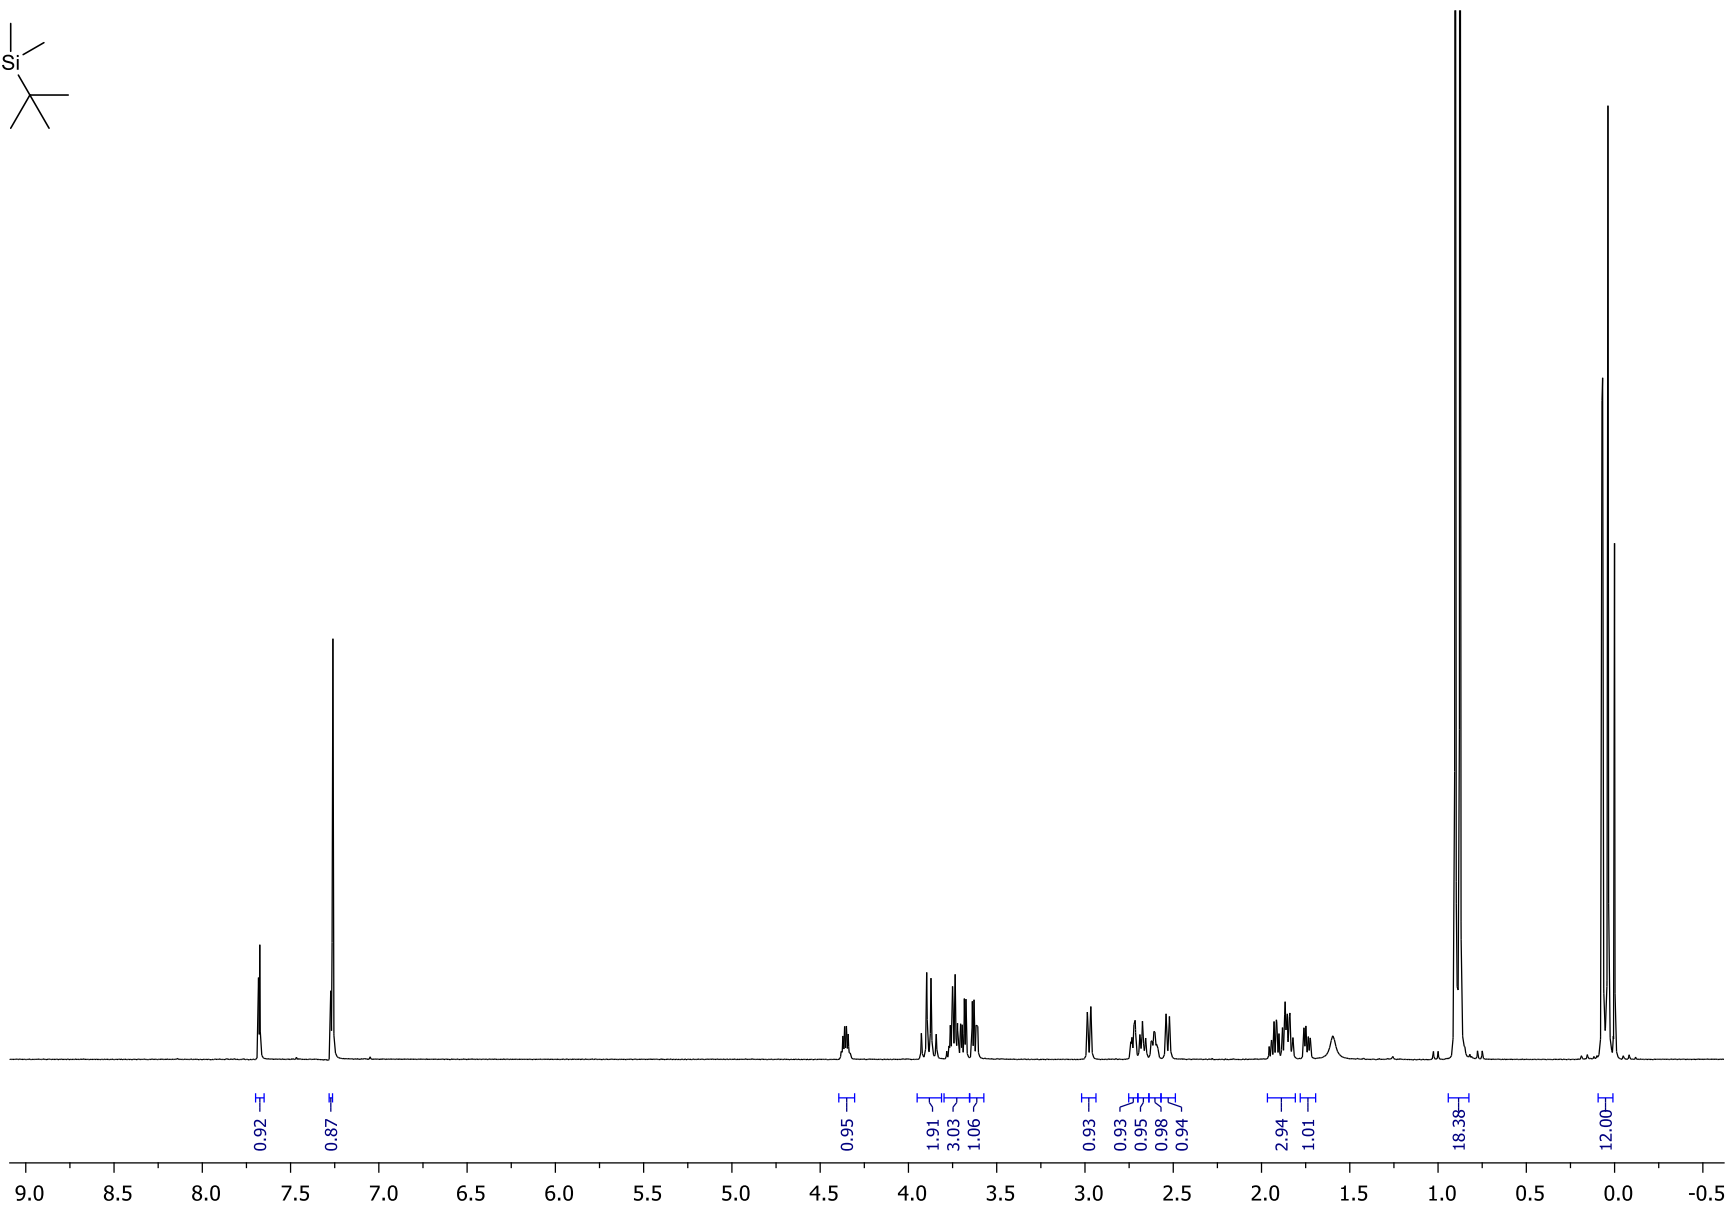

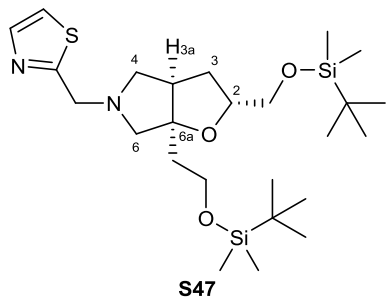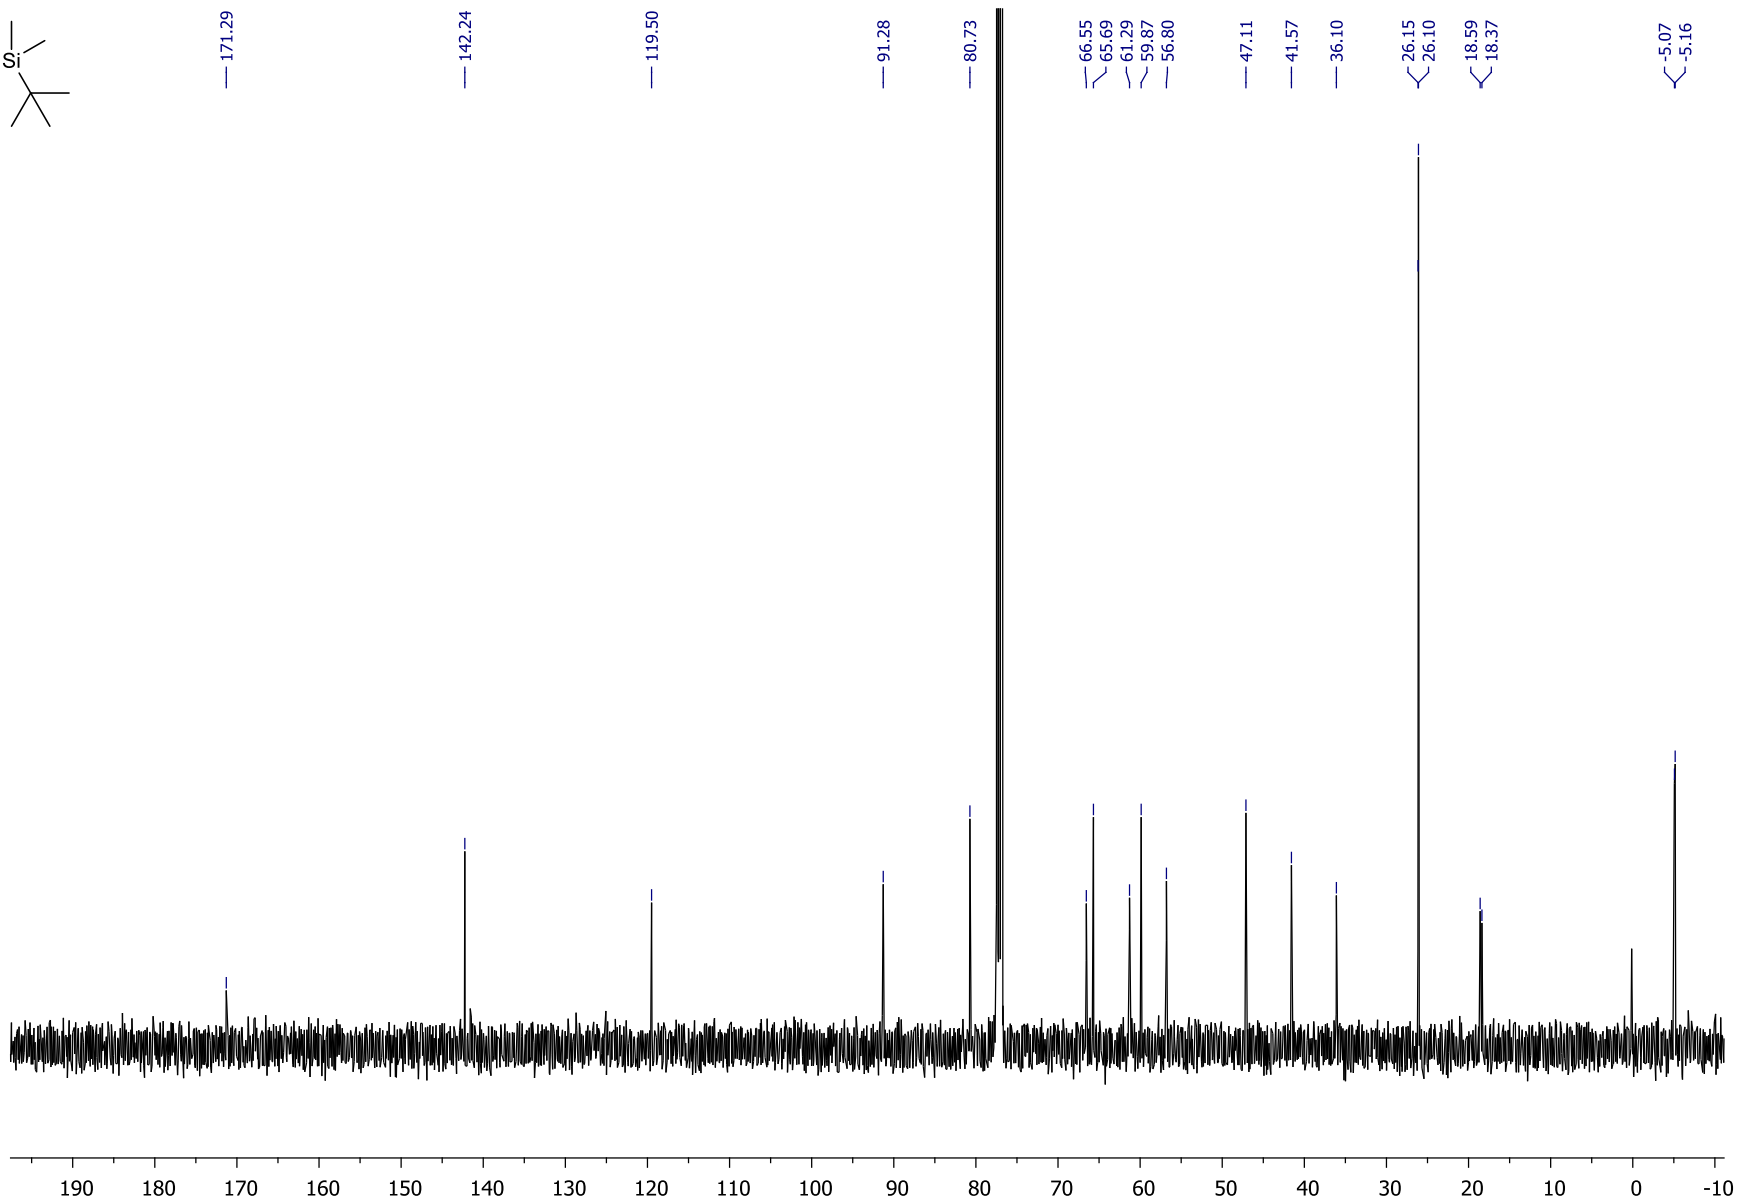



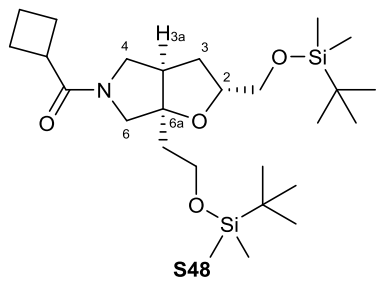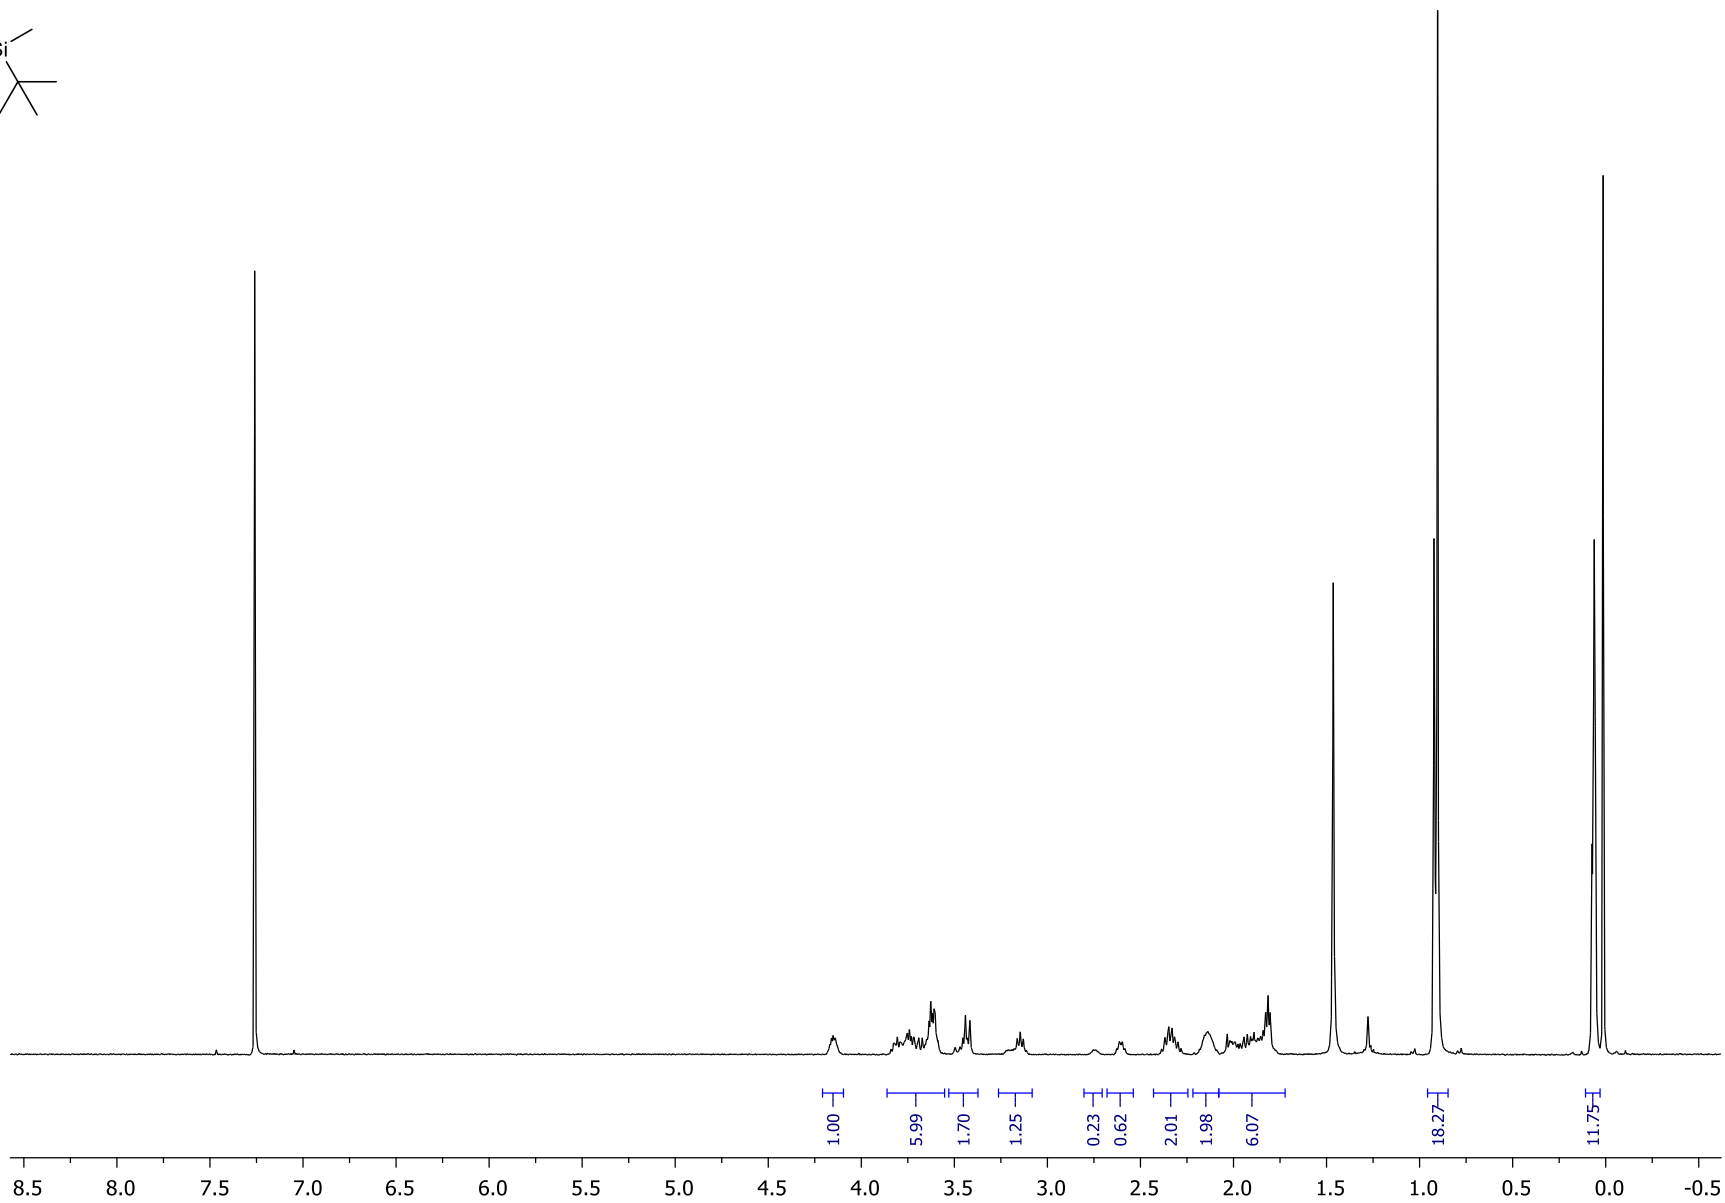

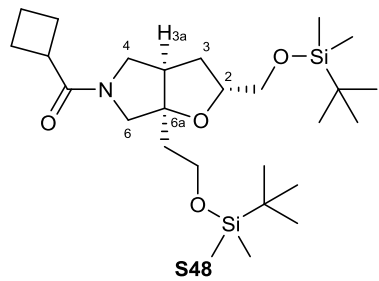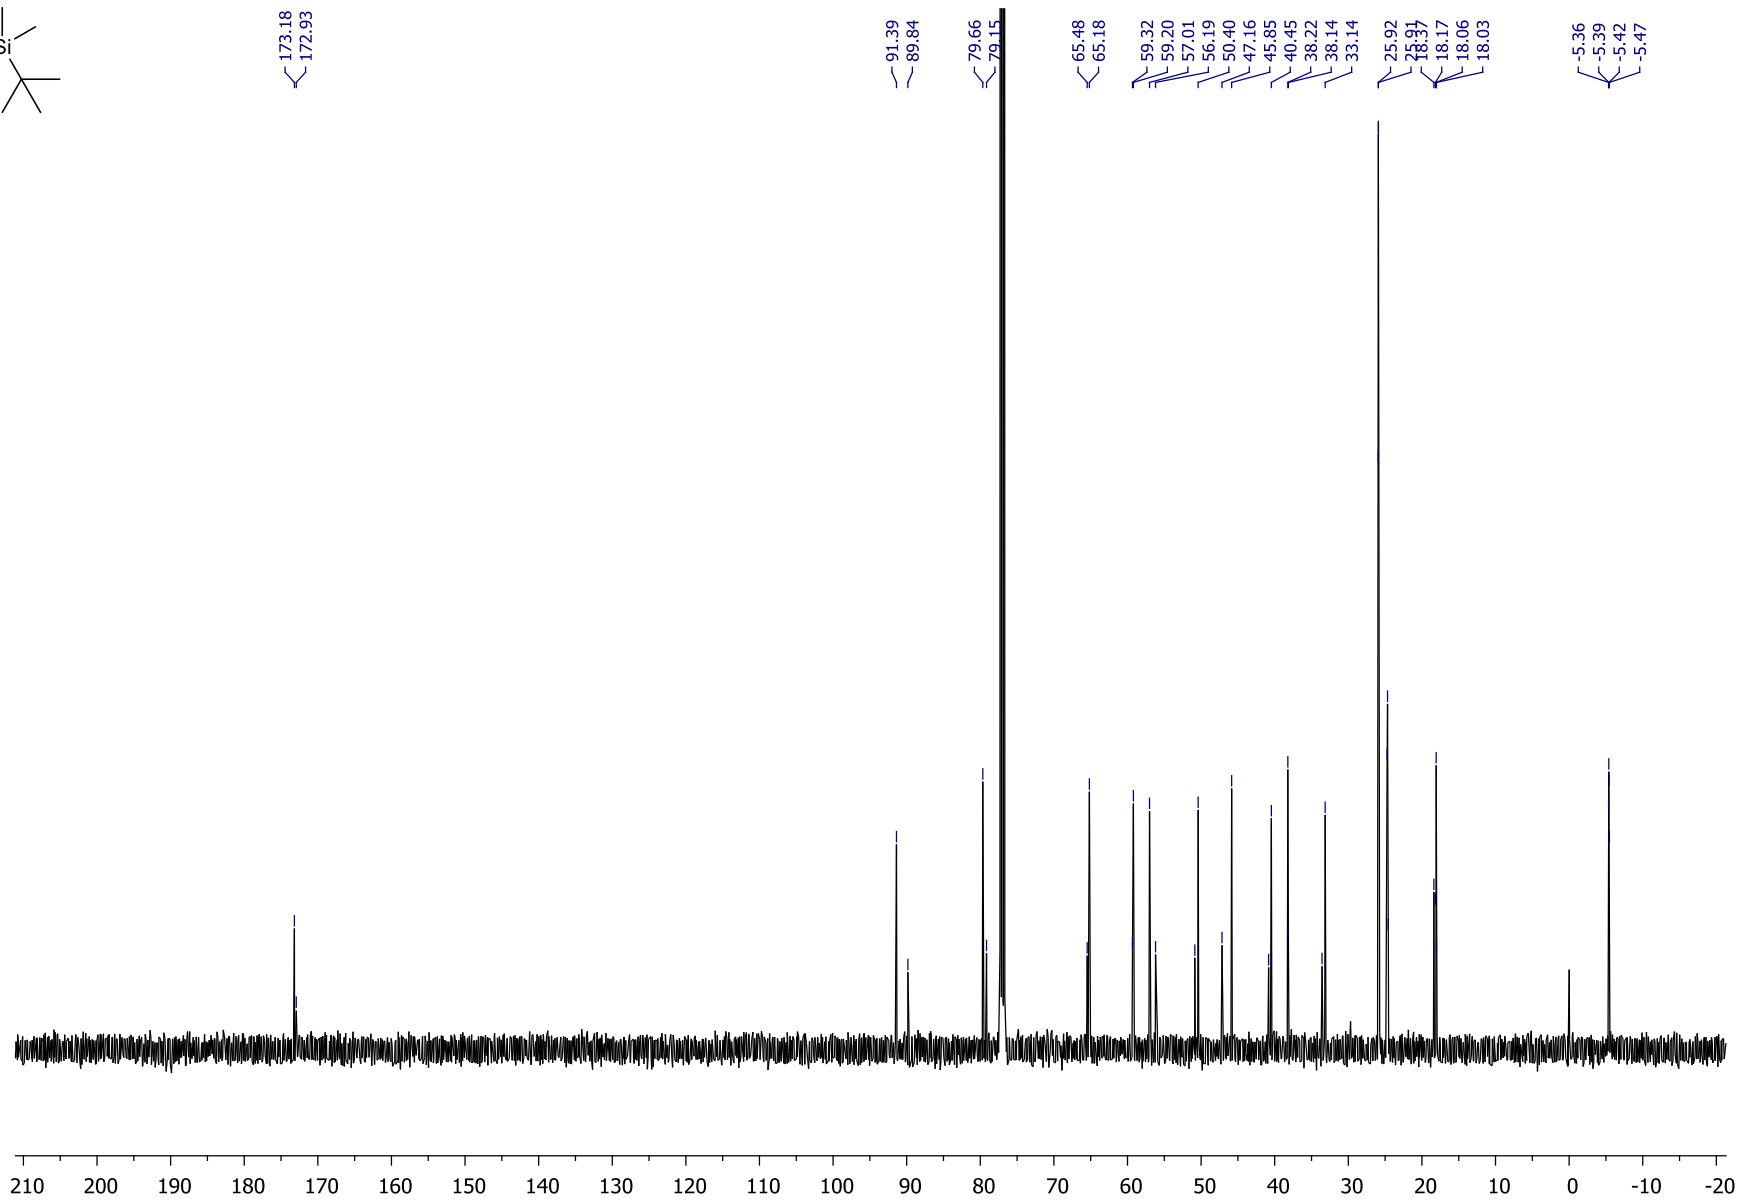

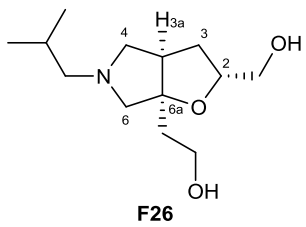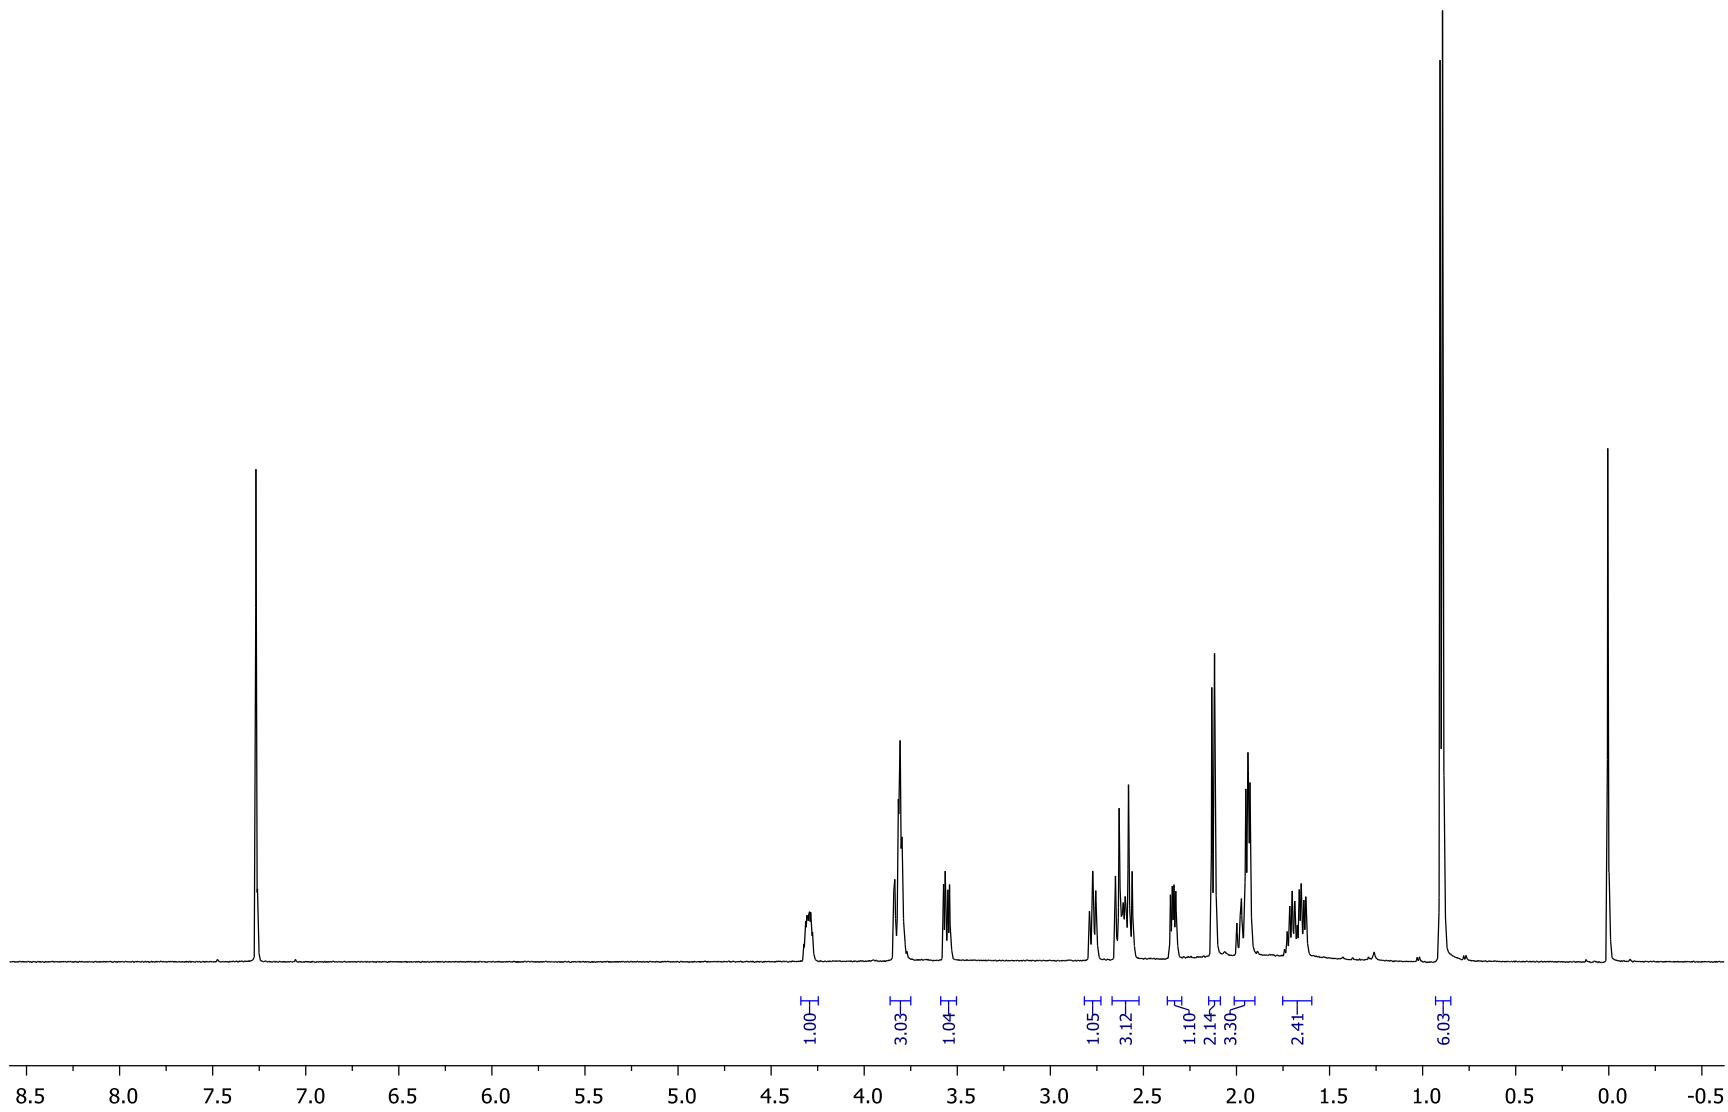

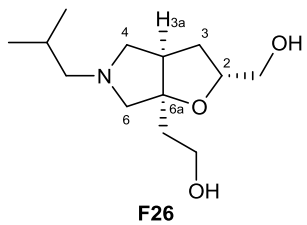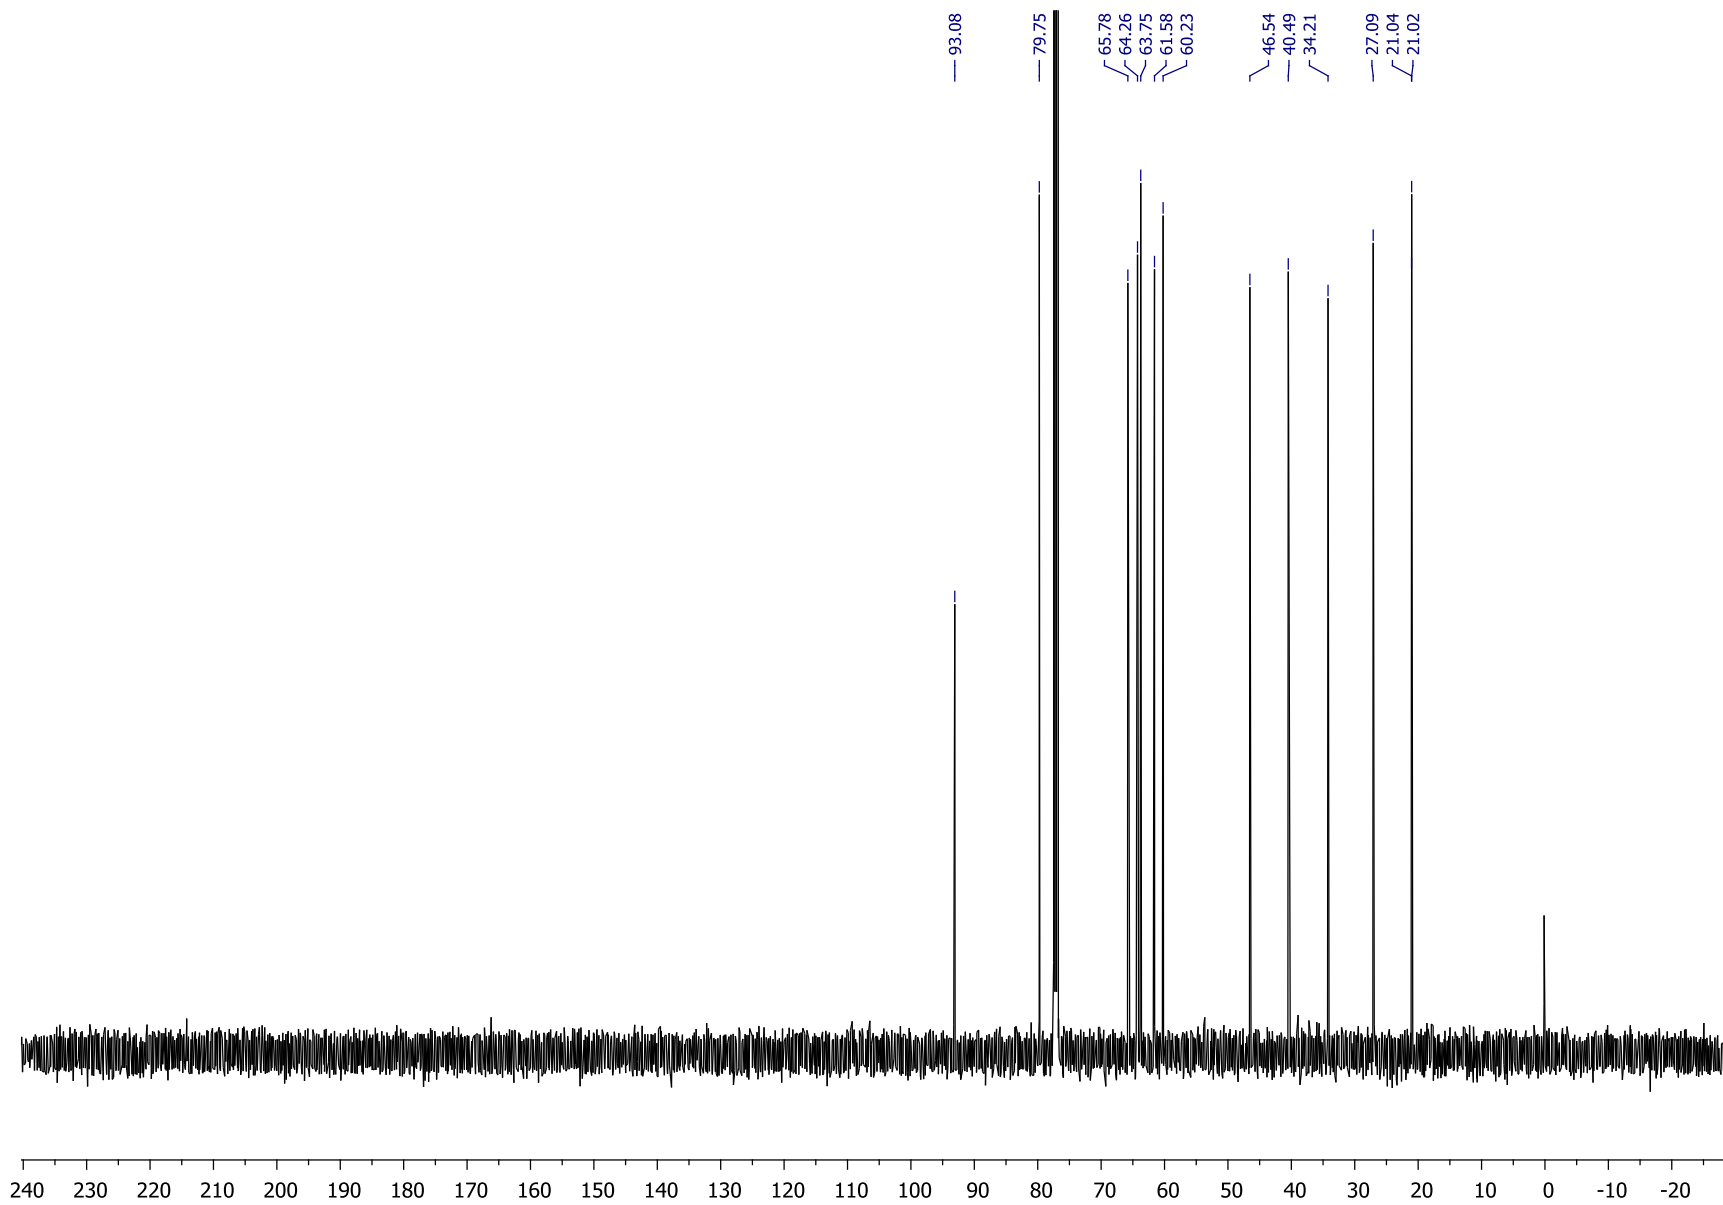

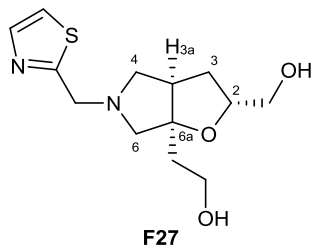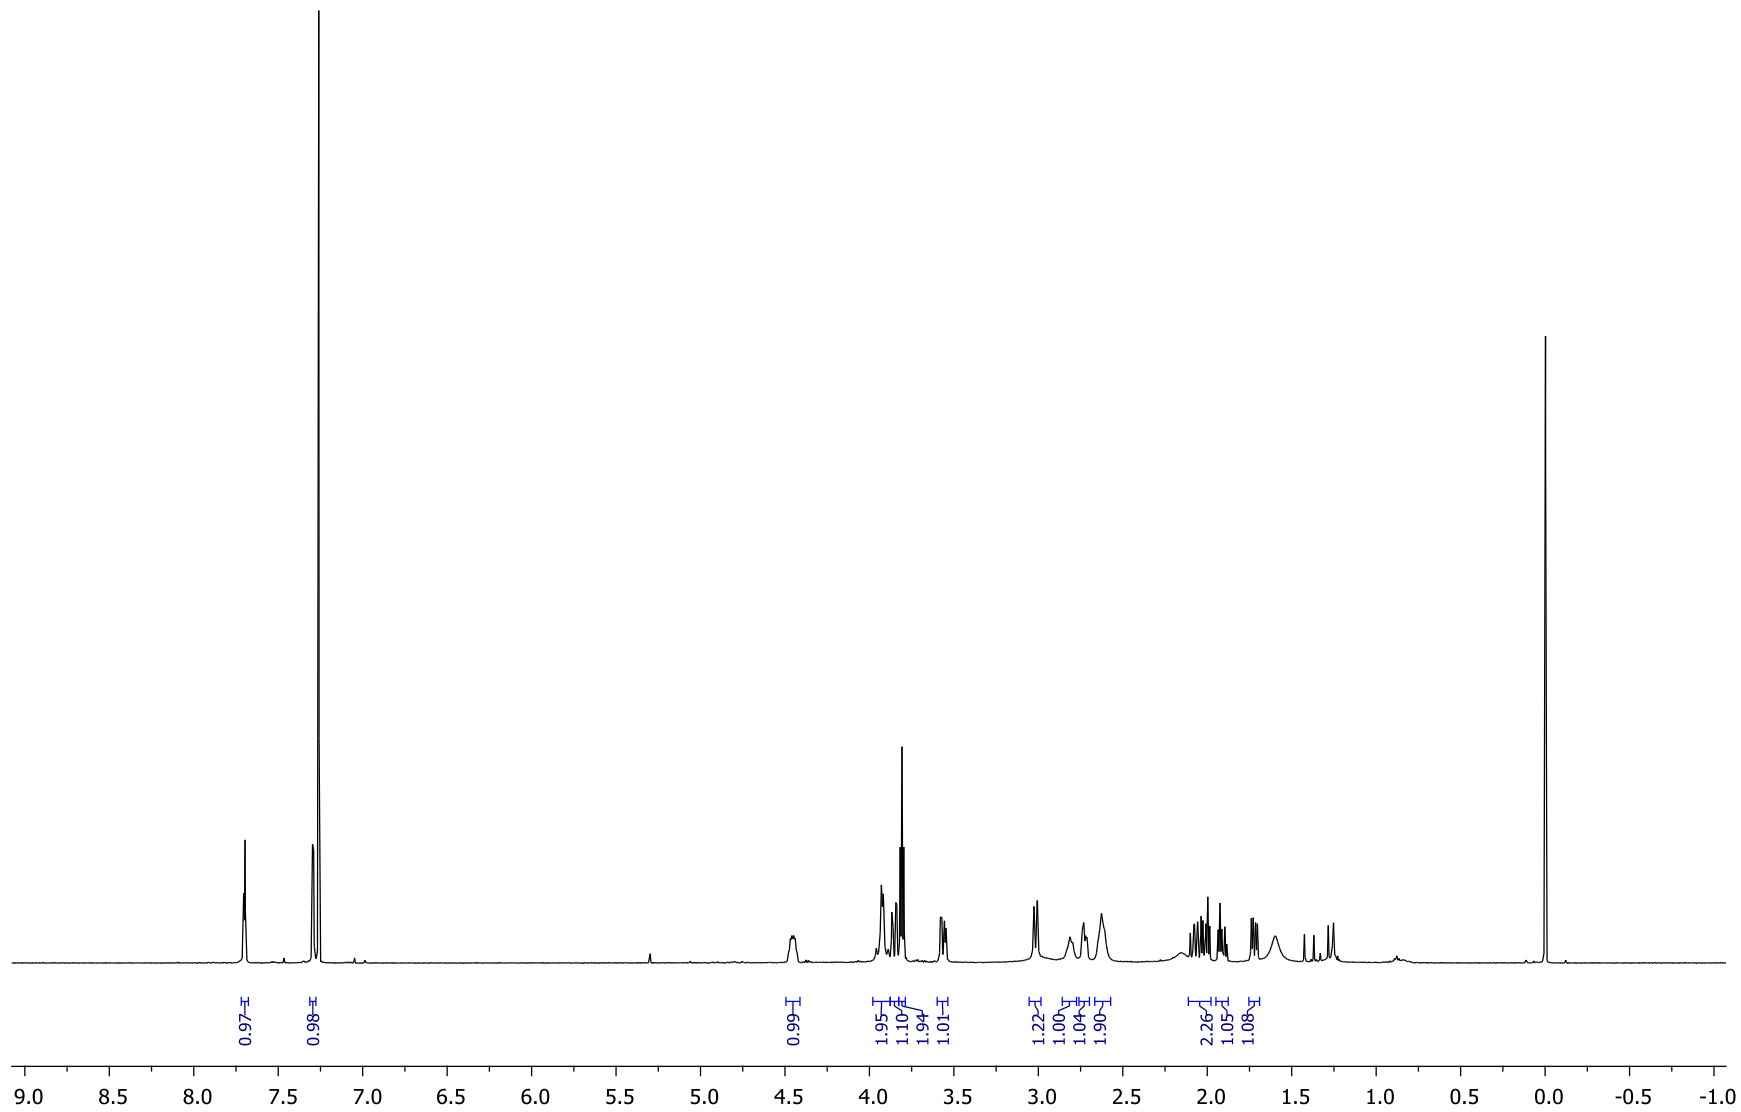

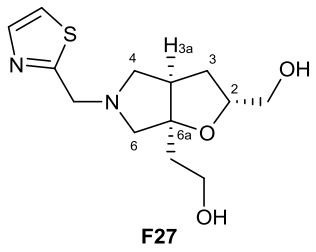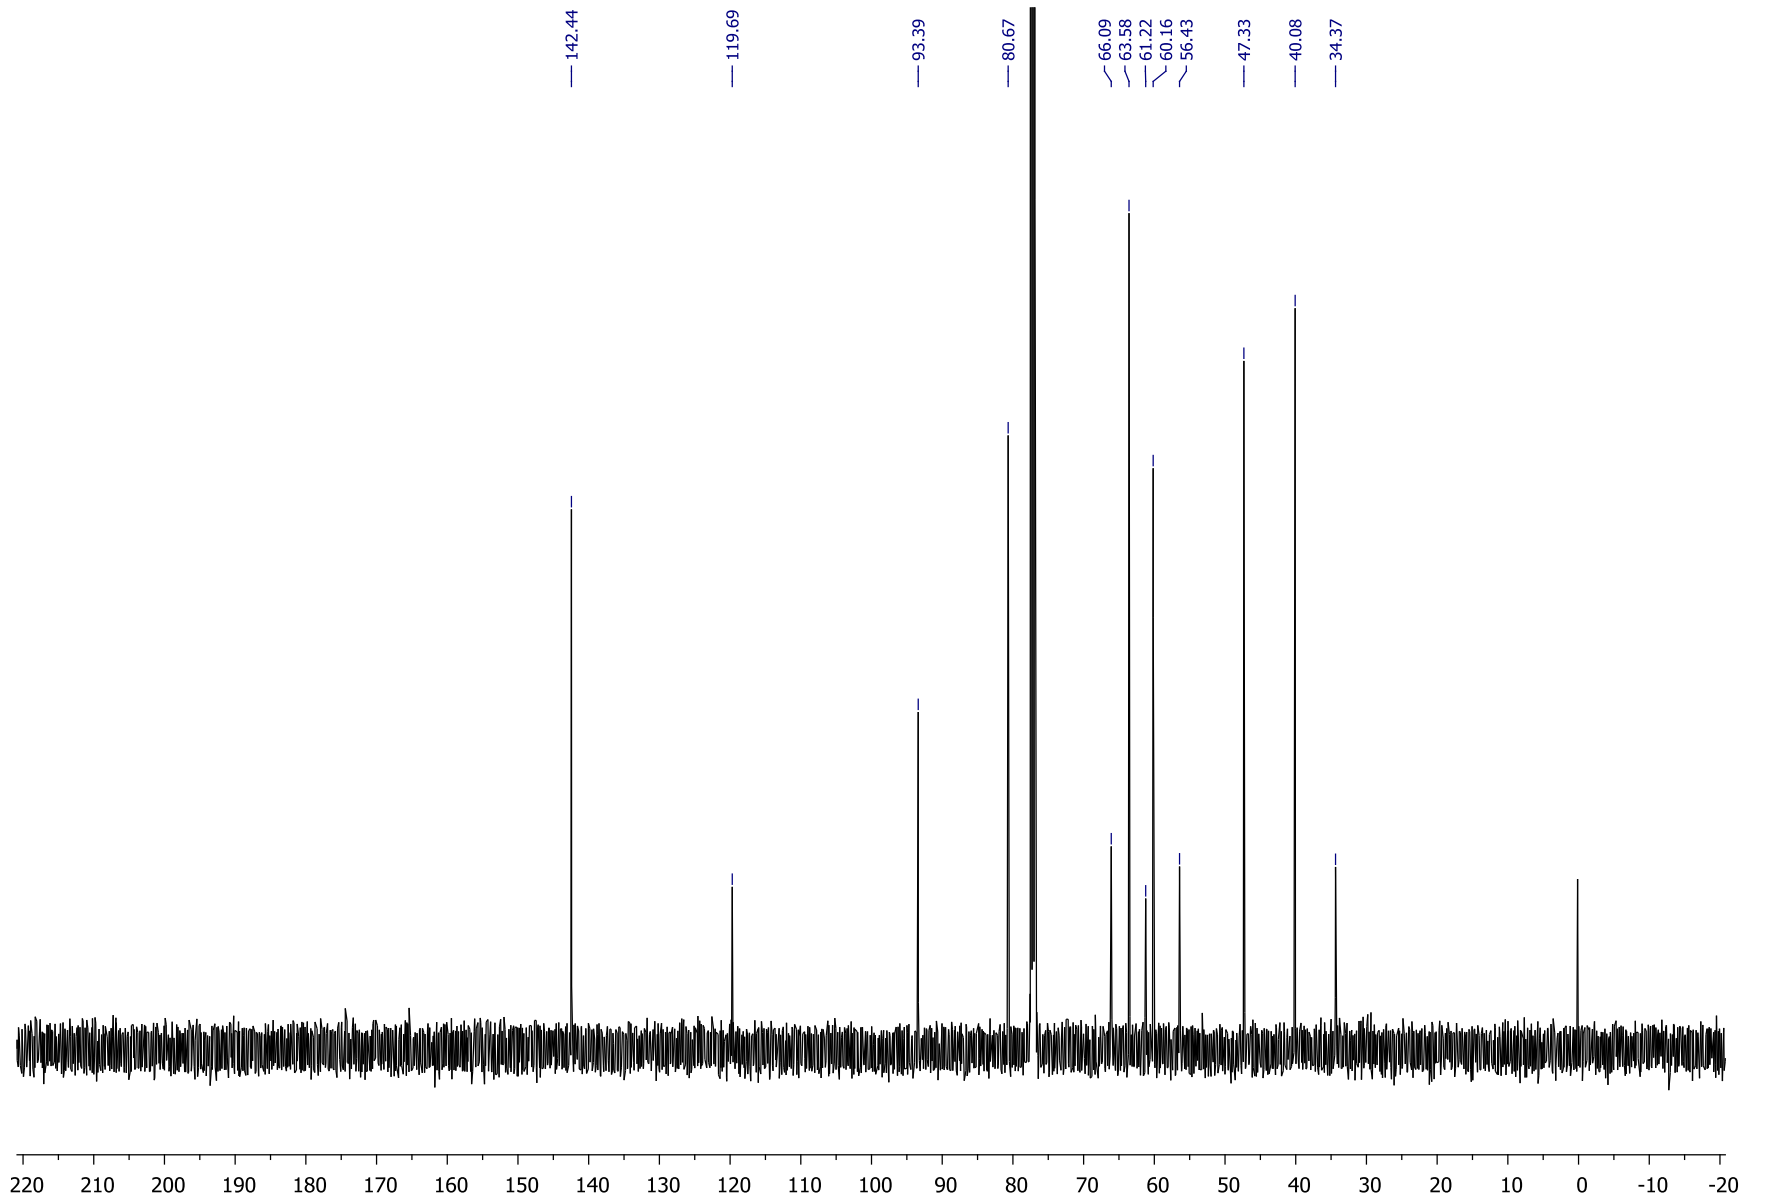

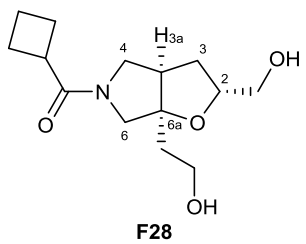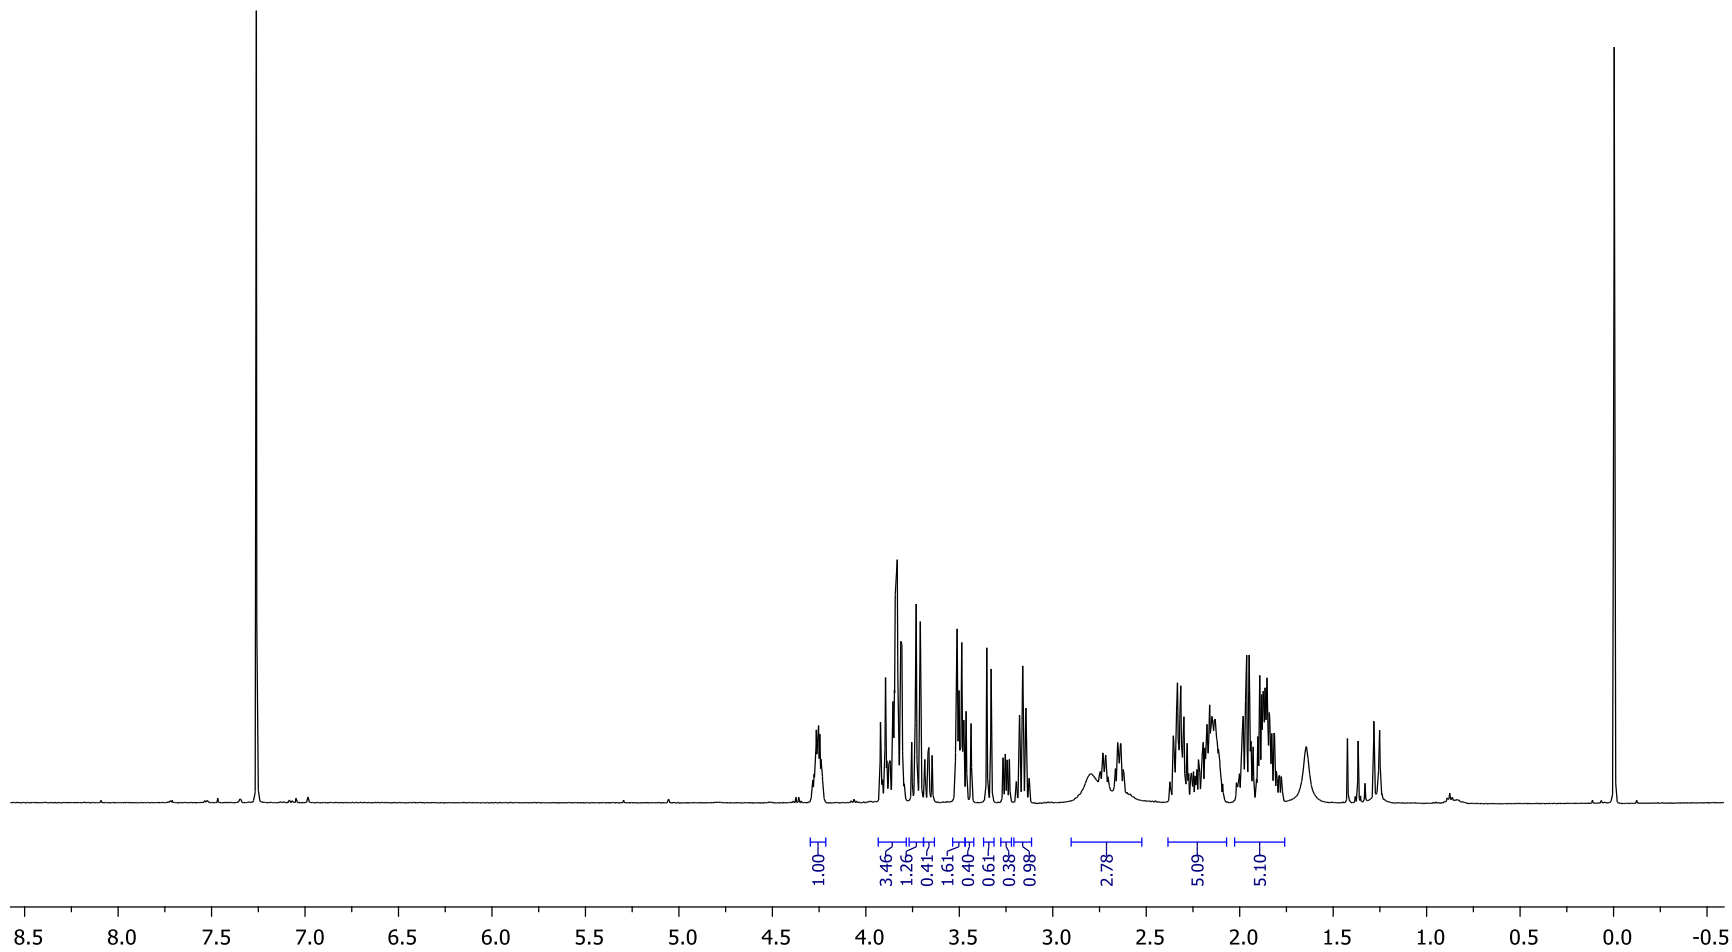

370

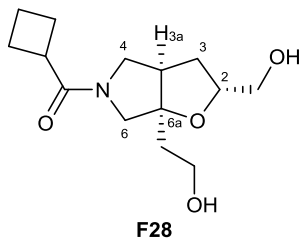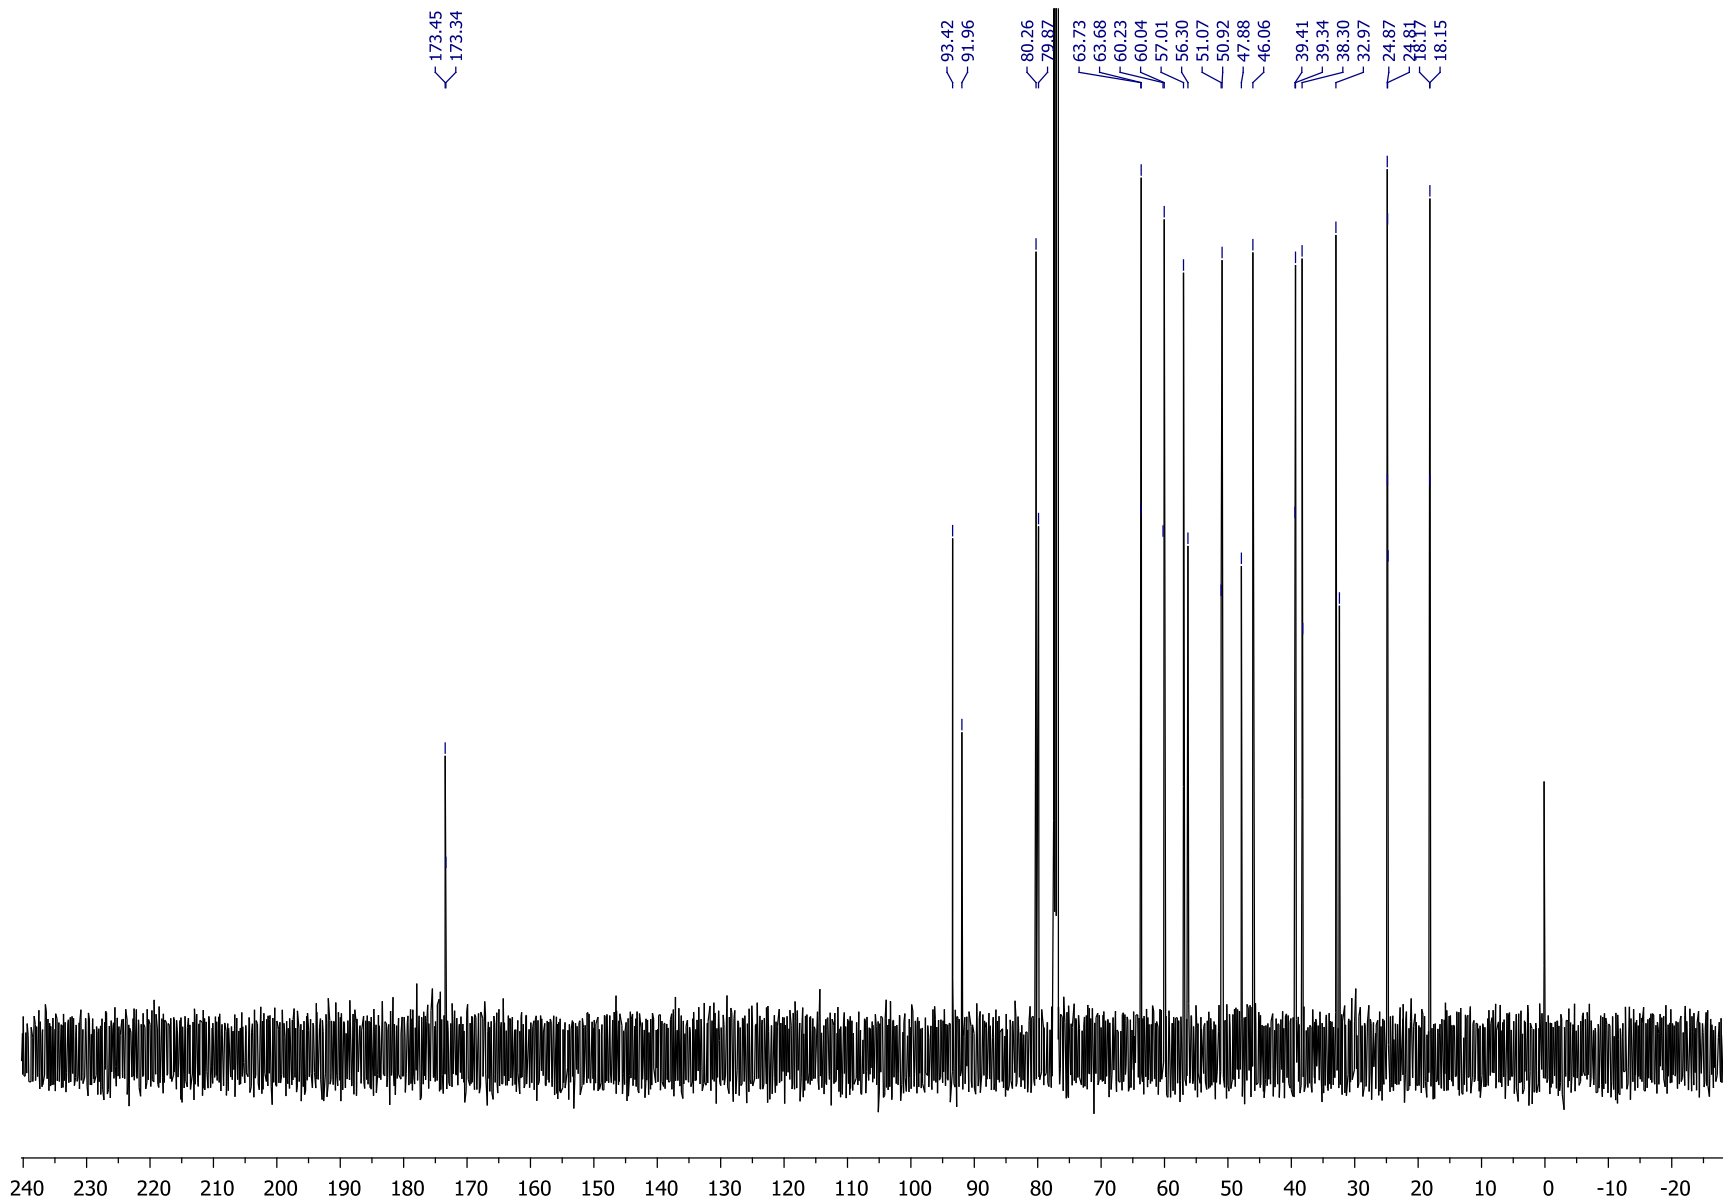



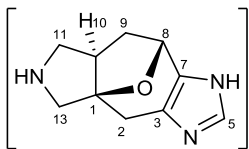

**F29•2HCl**  
(MeOD-d<sub>4</sub> @ 333 K)

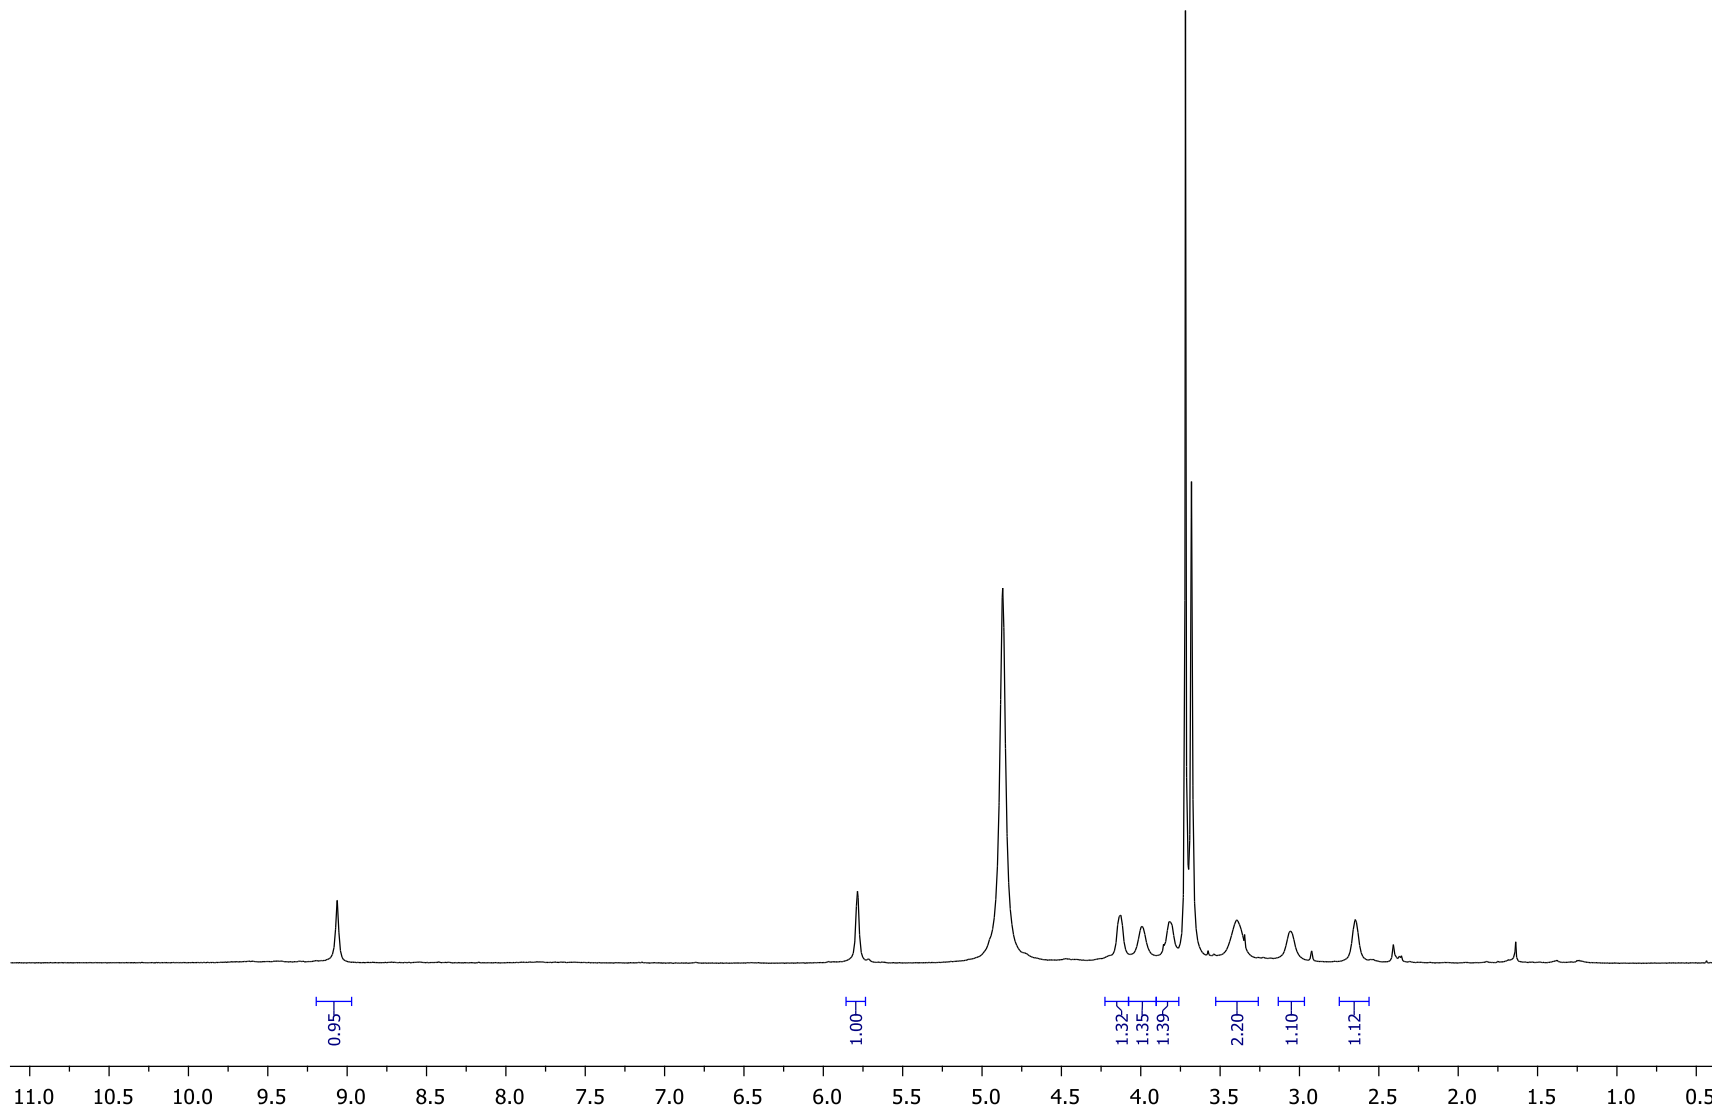

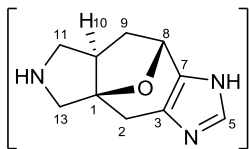

**F29•2HCl**  
(MeOD-d<sub>4</sub> @ 333 K)

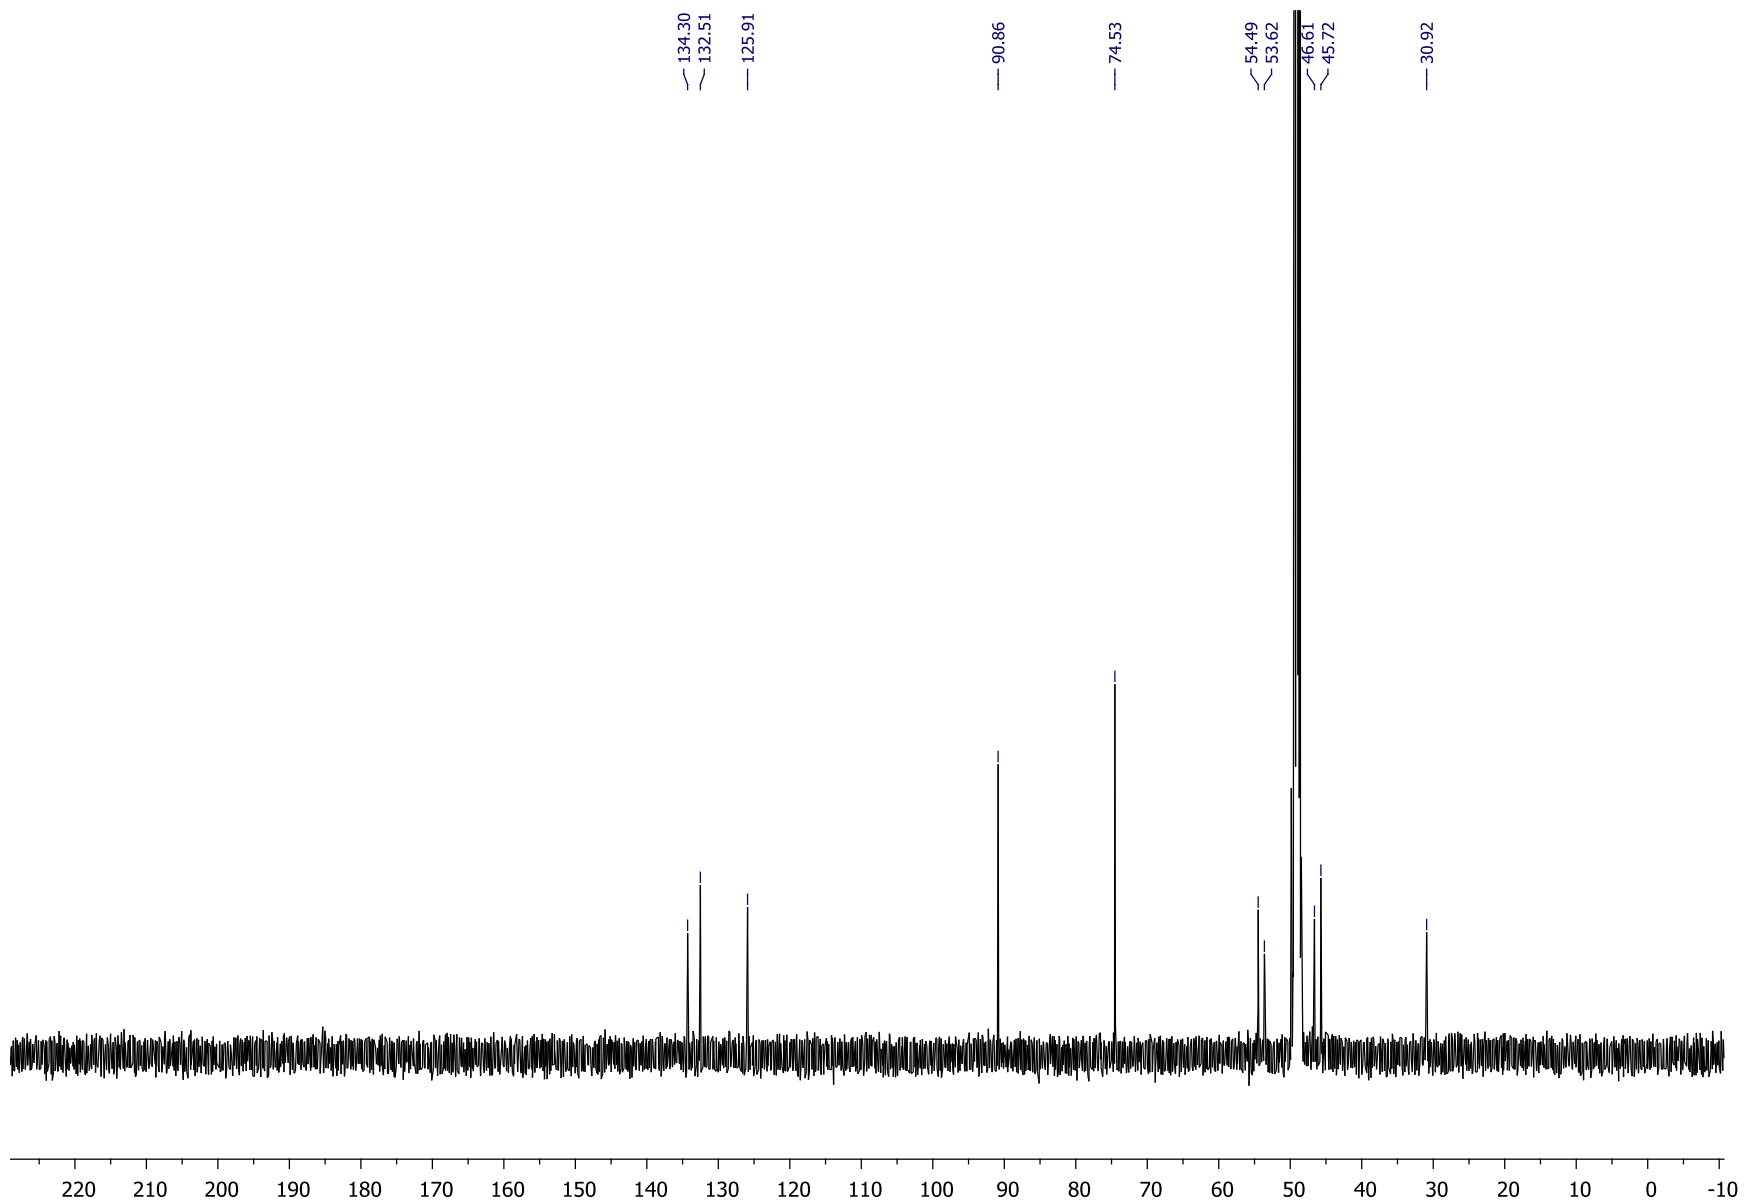

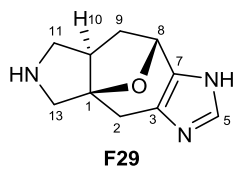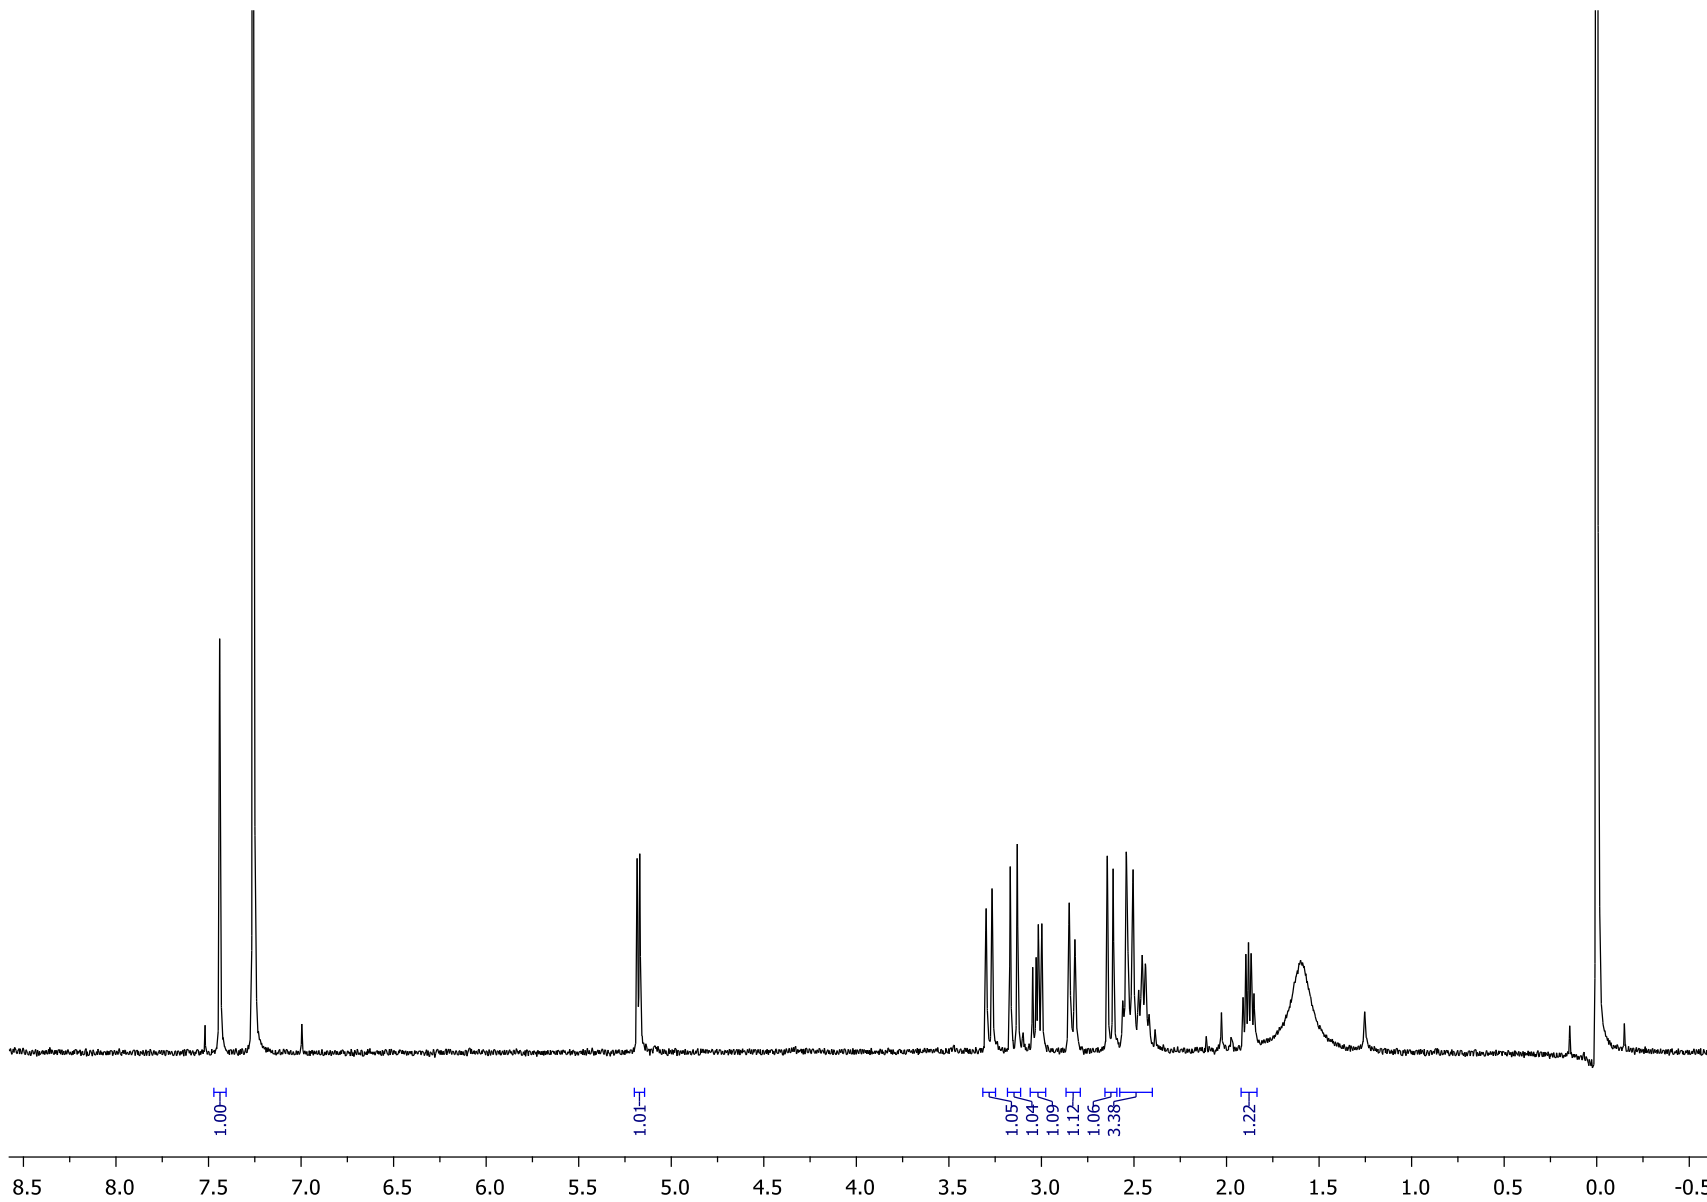

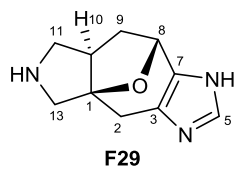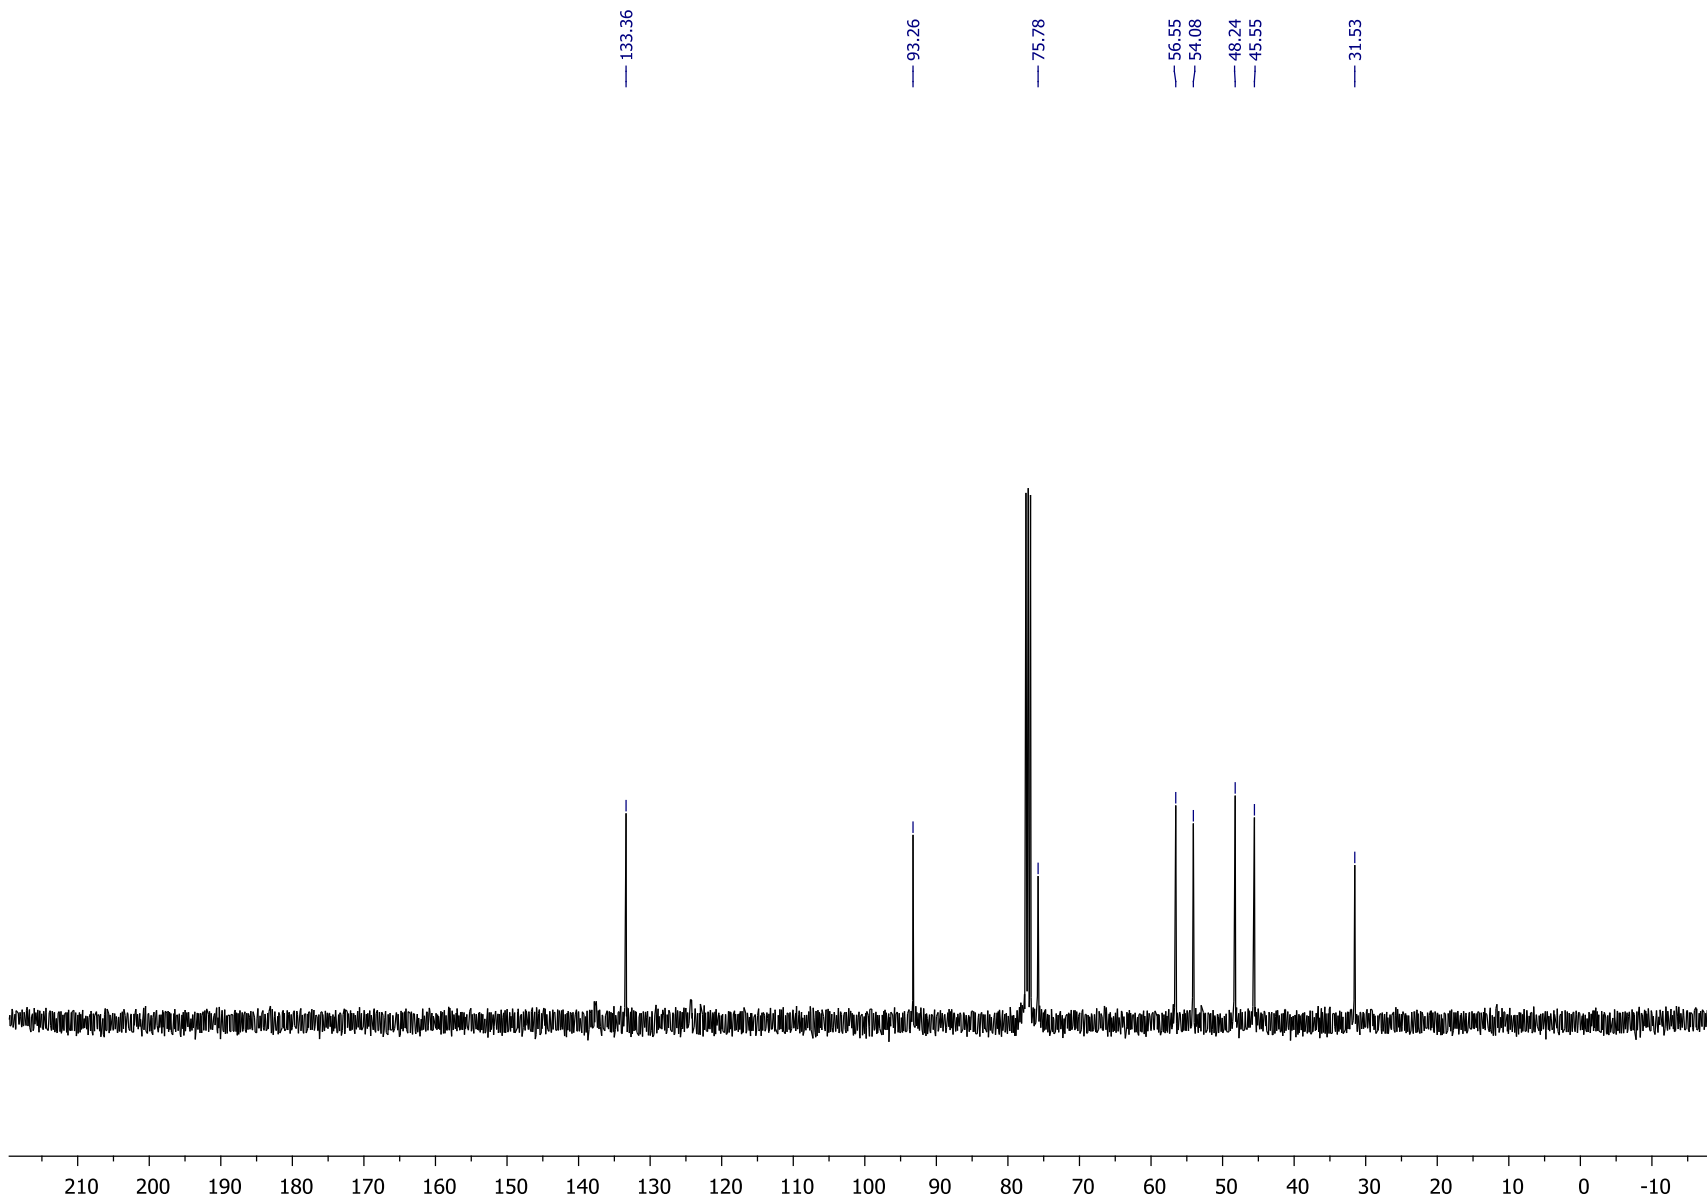

375

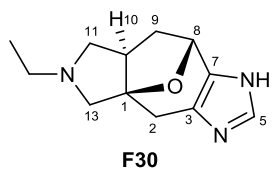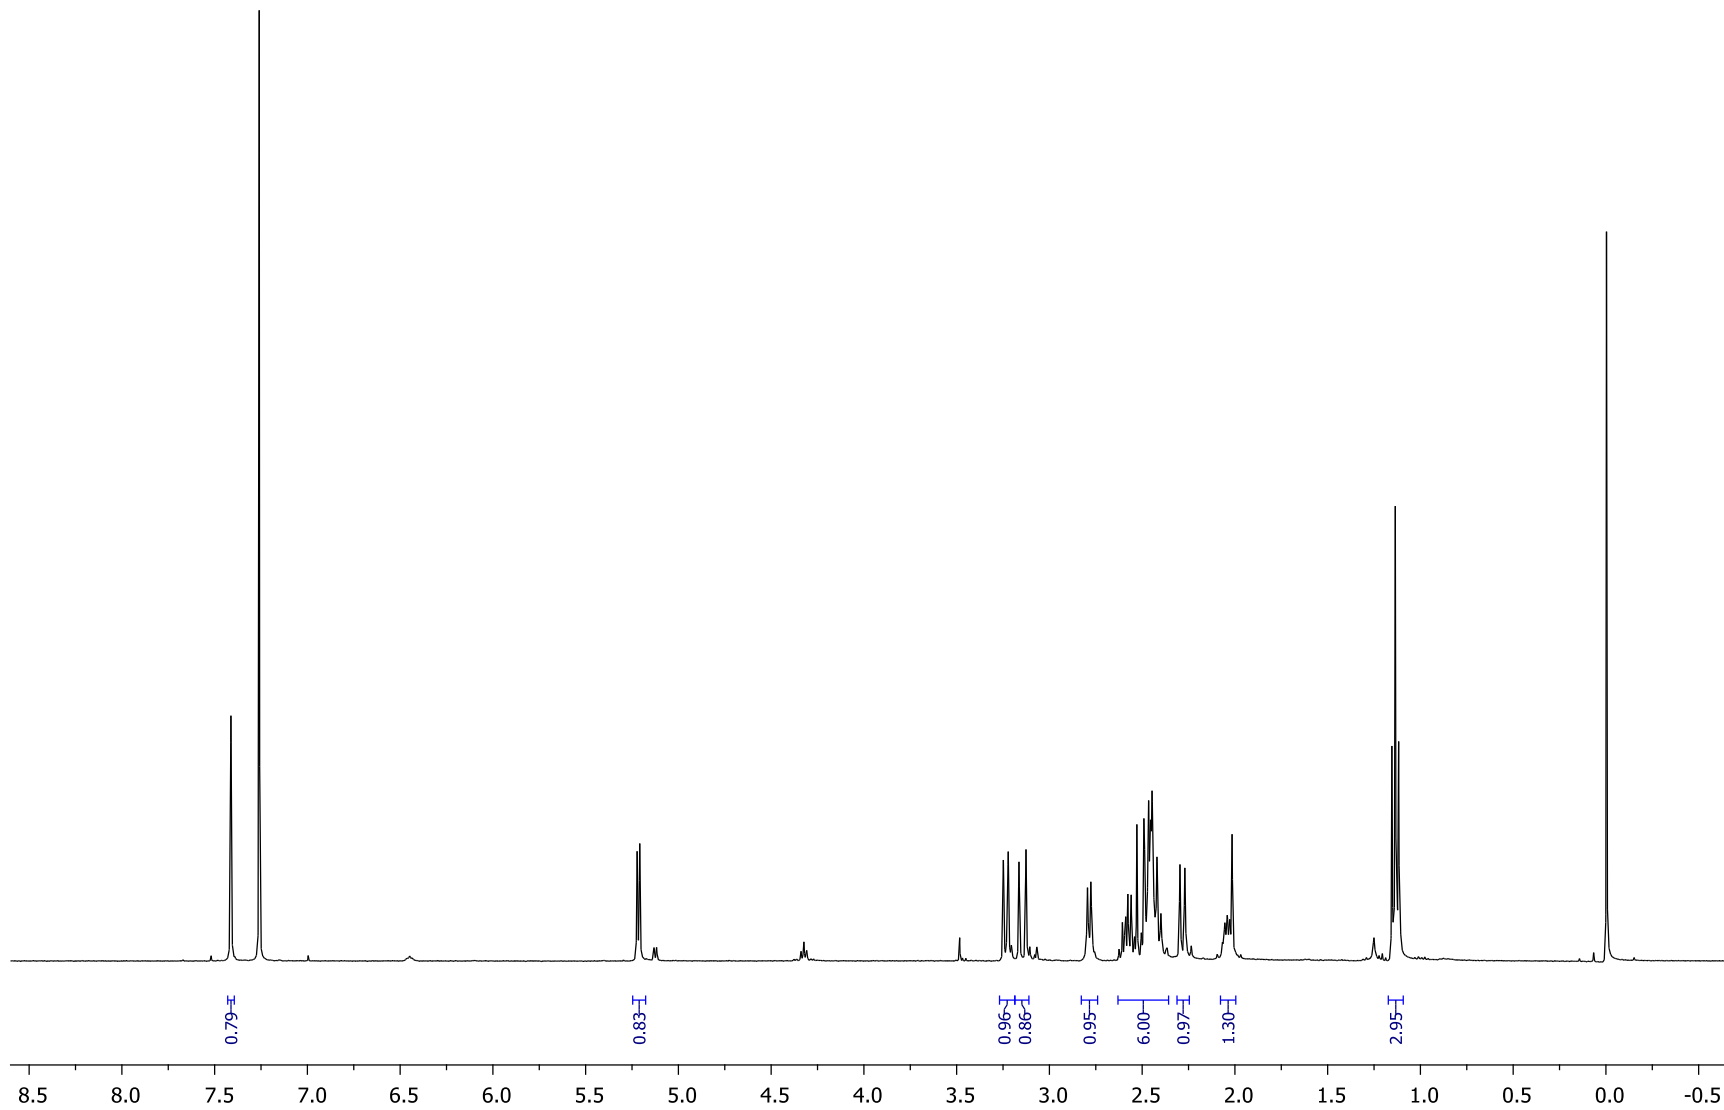

376

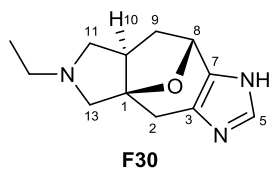

— 136.55  
— 133.40  
— 124.69  
  
— 90.36  
— 75.68  
— 62.77  
— 59.52  
— 49.88  
— 46.18  
— 44.61  
— 32.89  
— 13.29

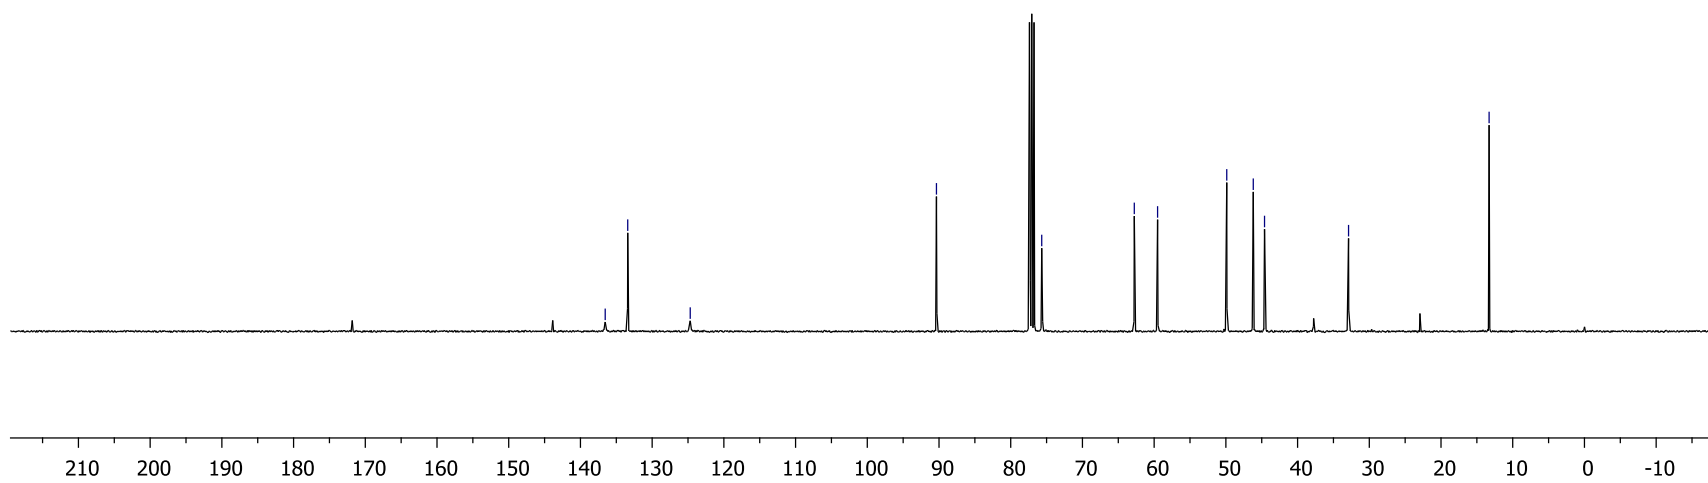

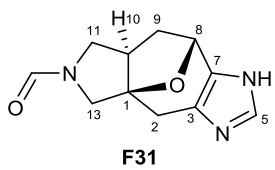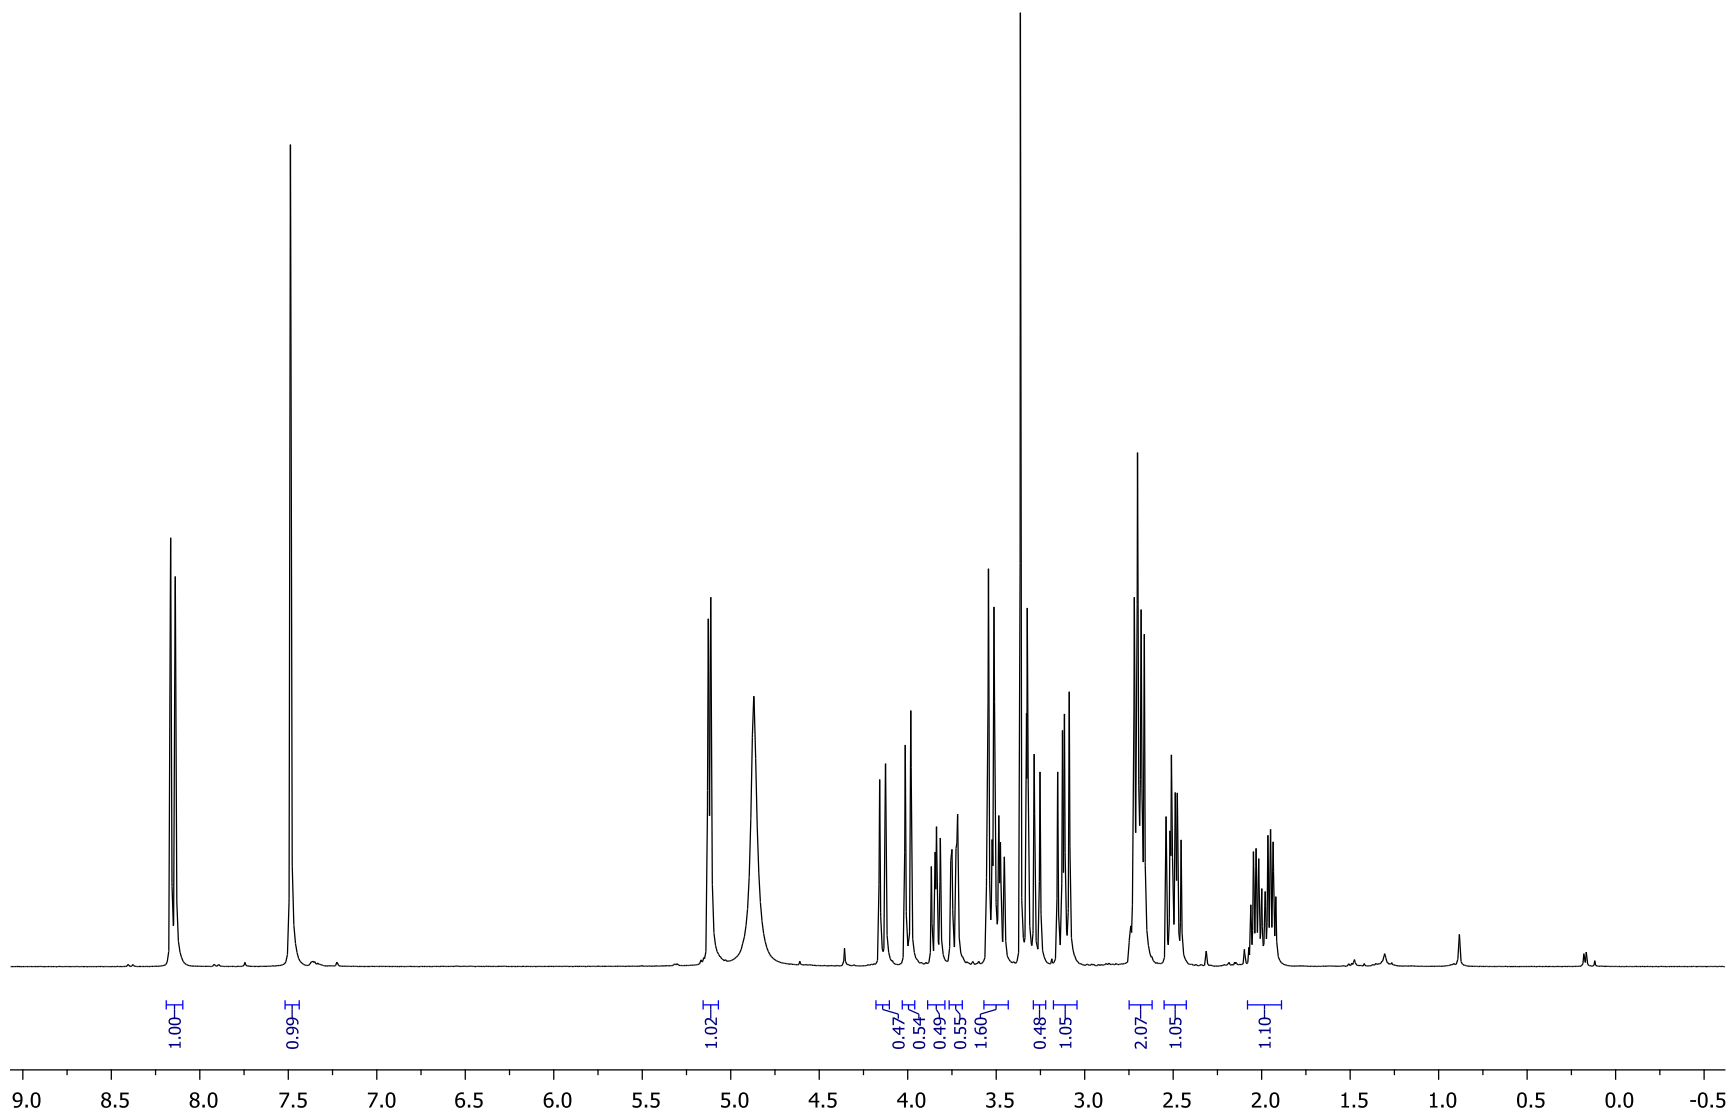

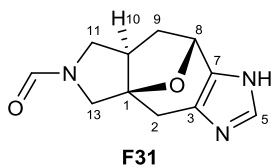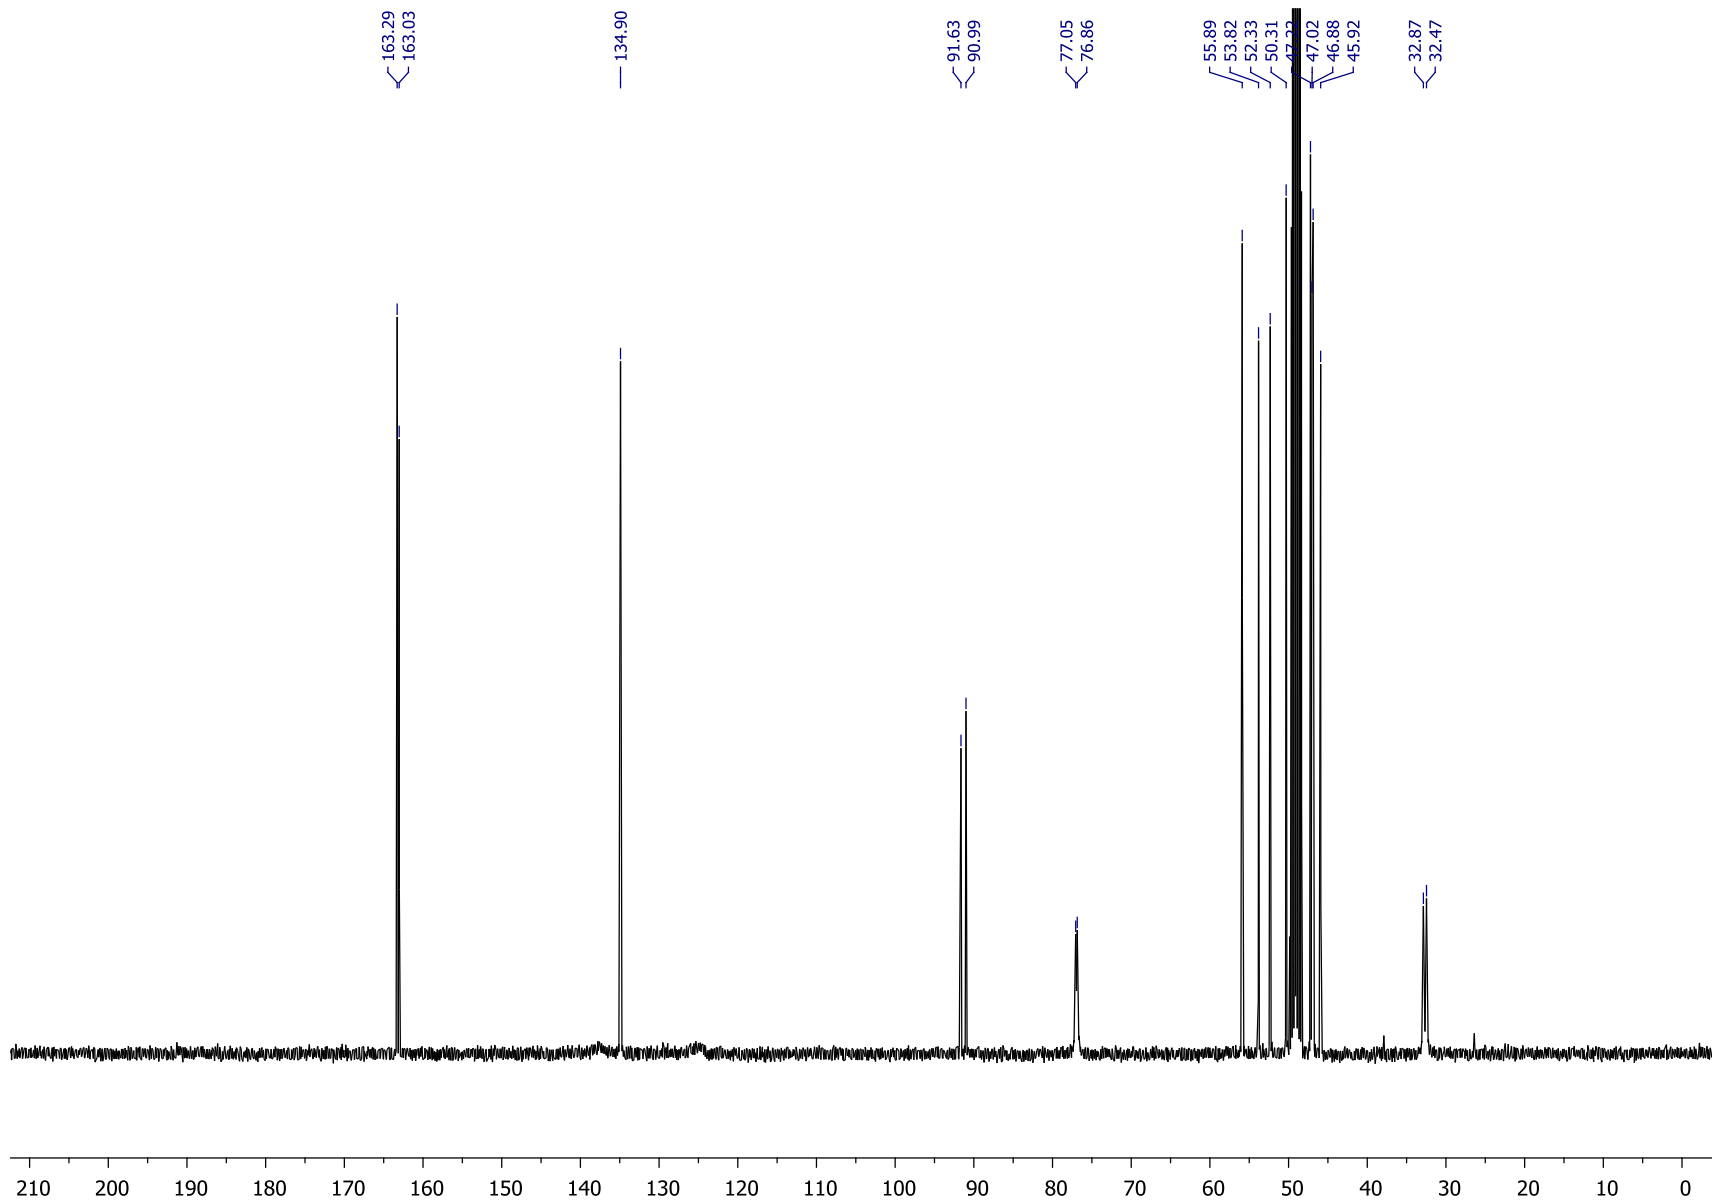



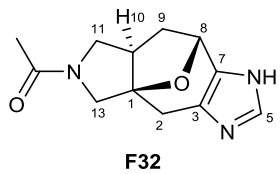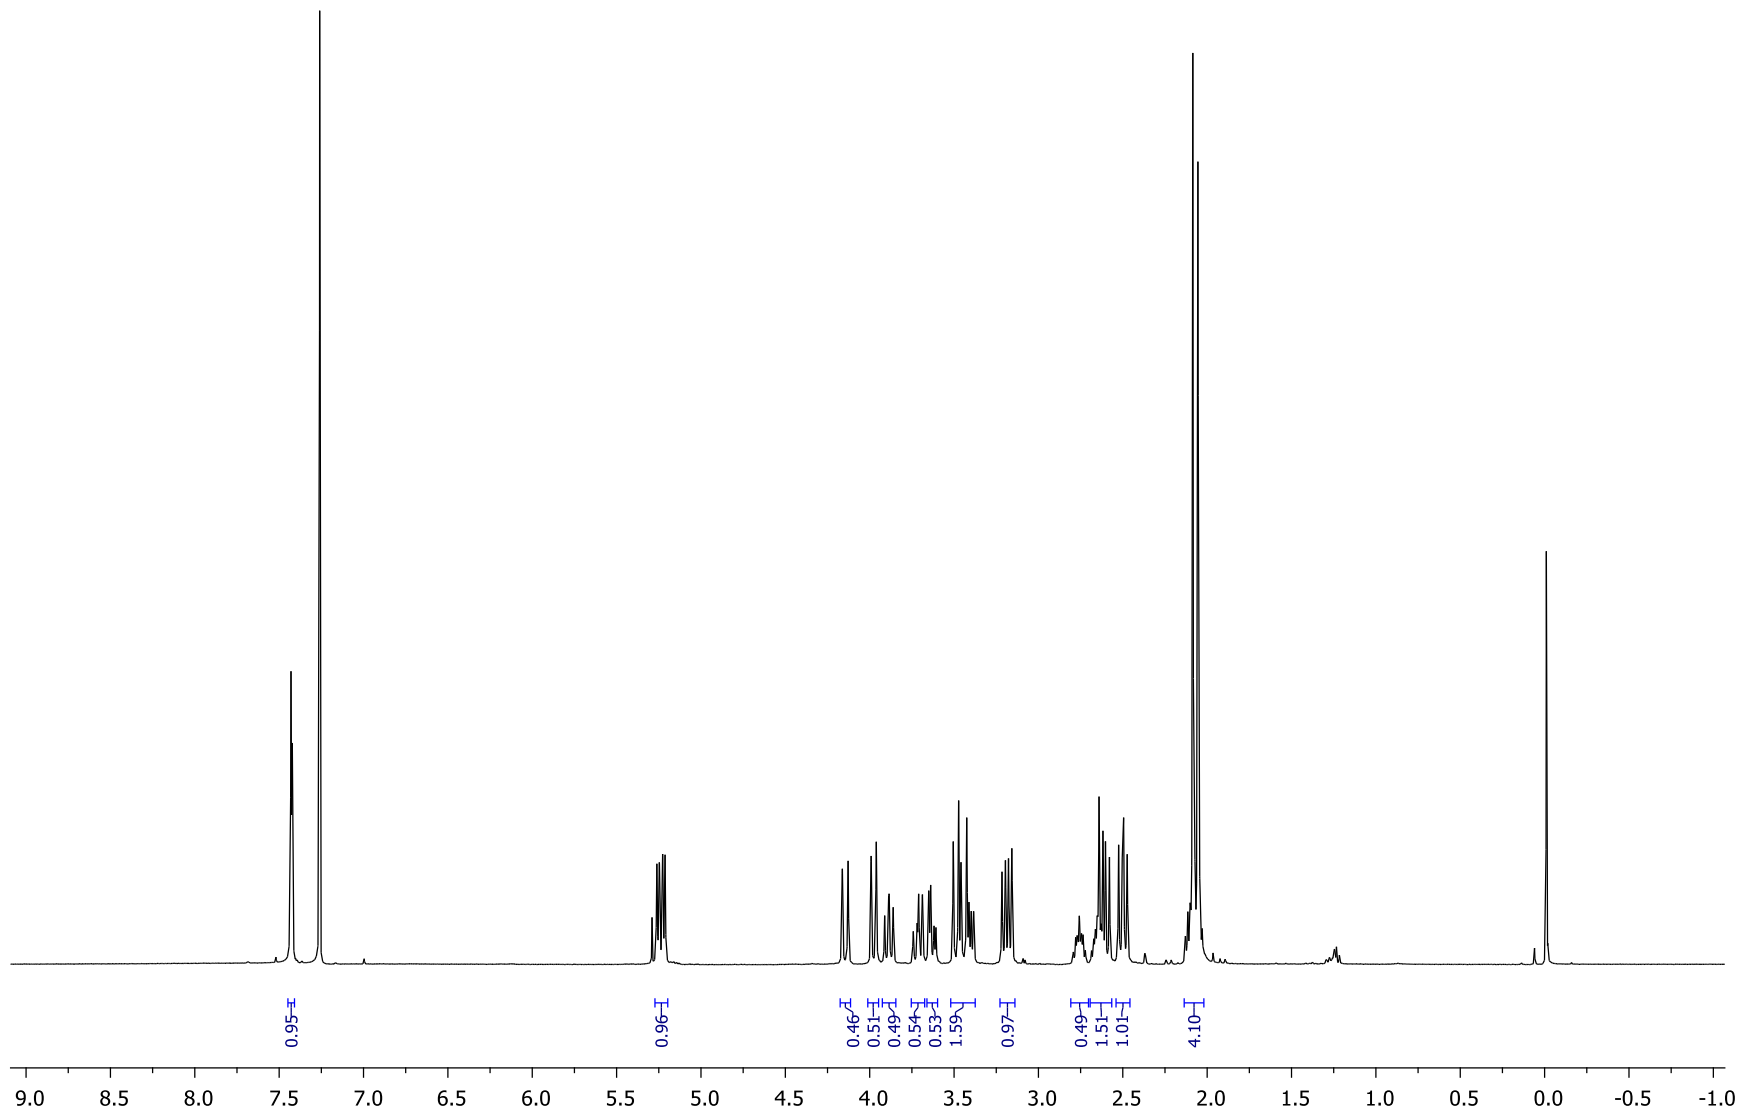

380

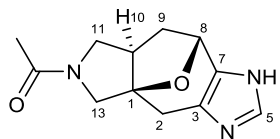

F32

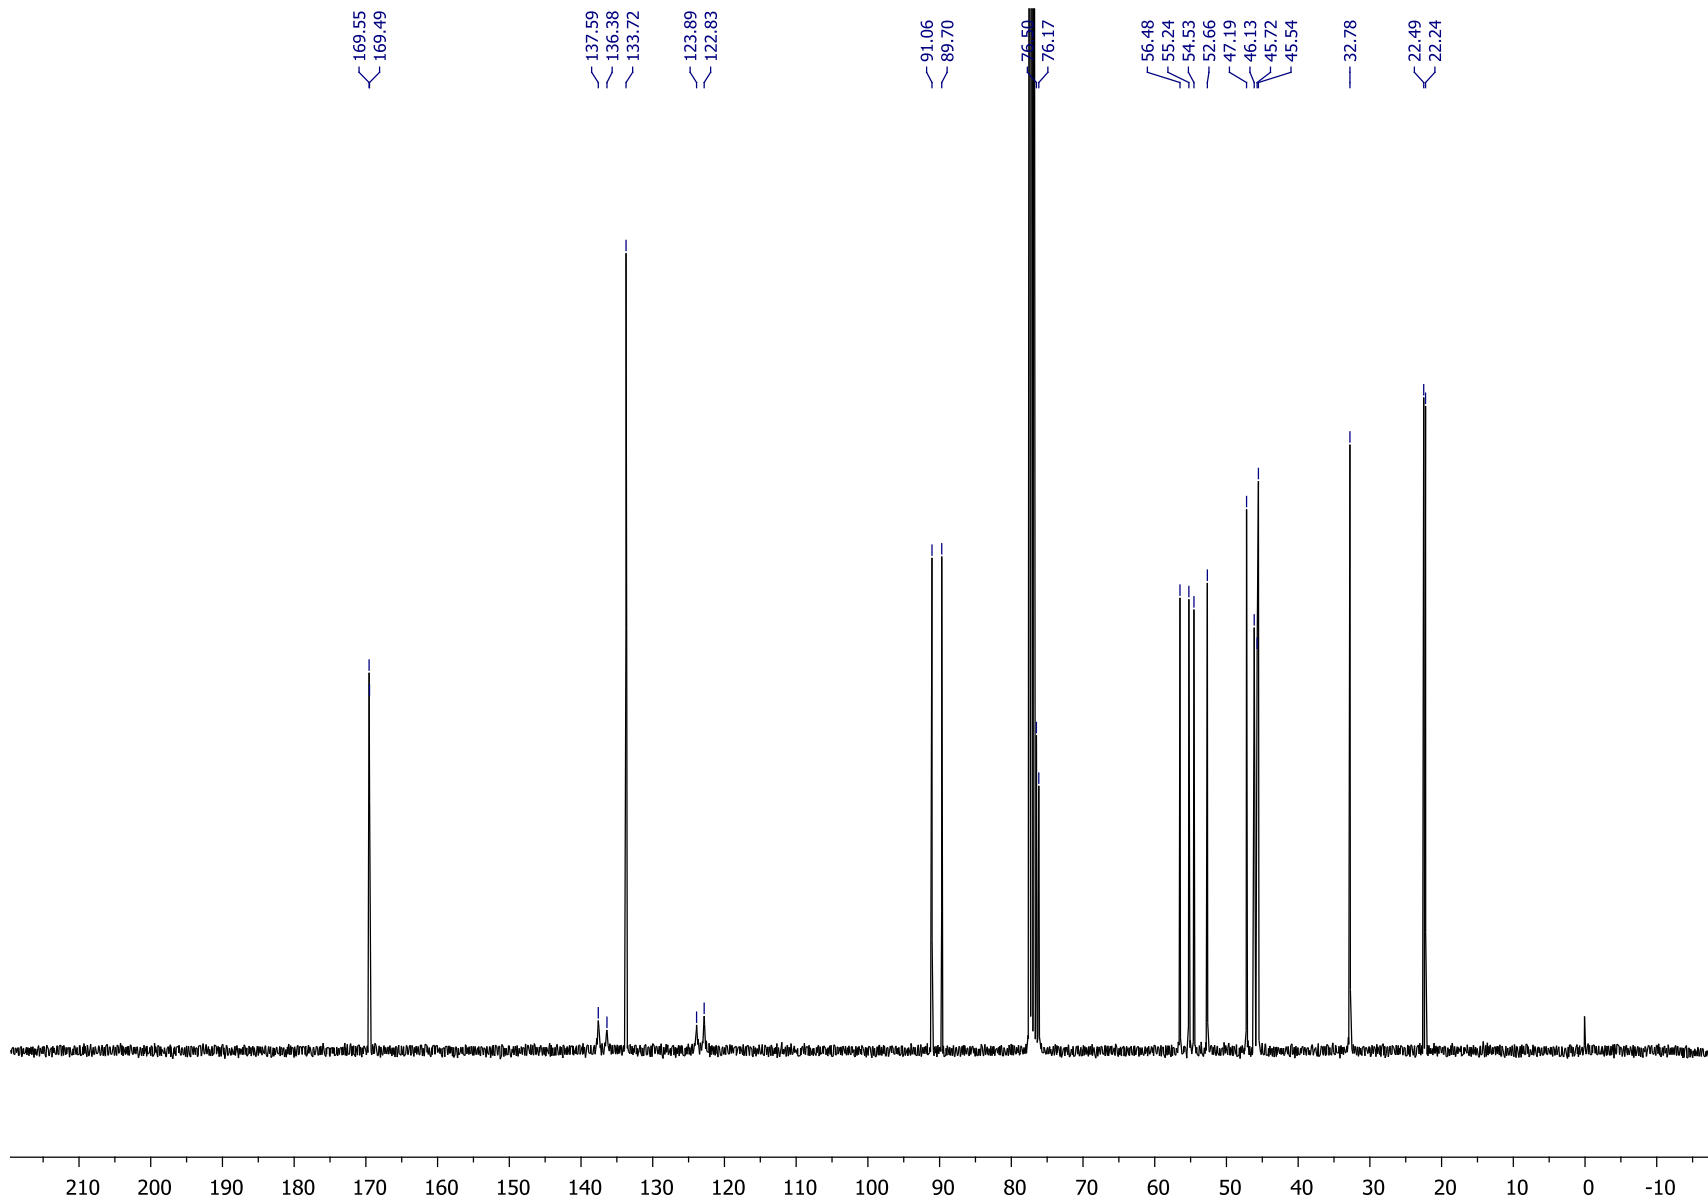

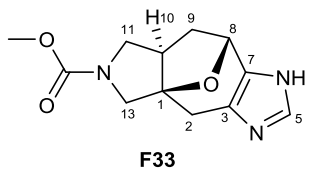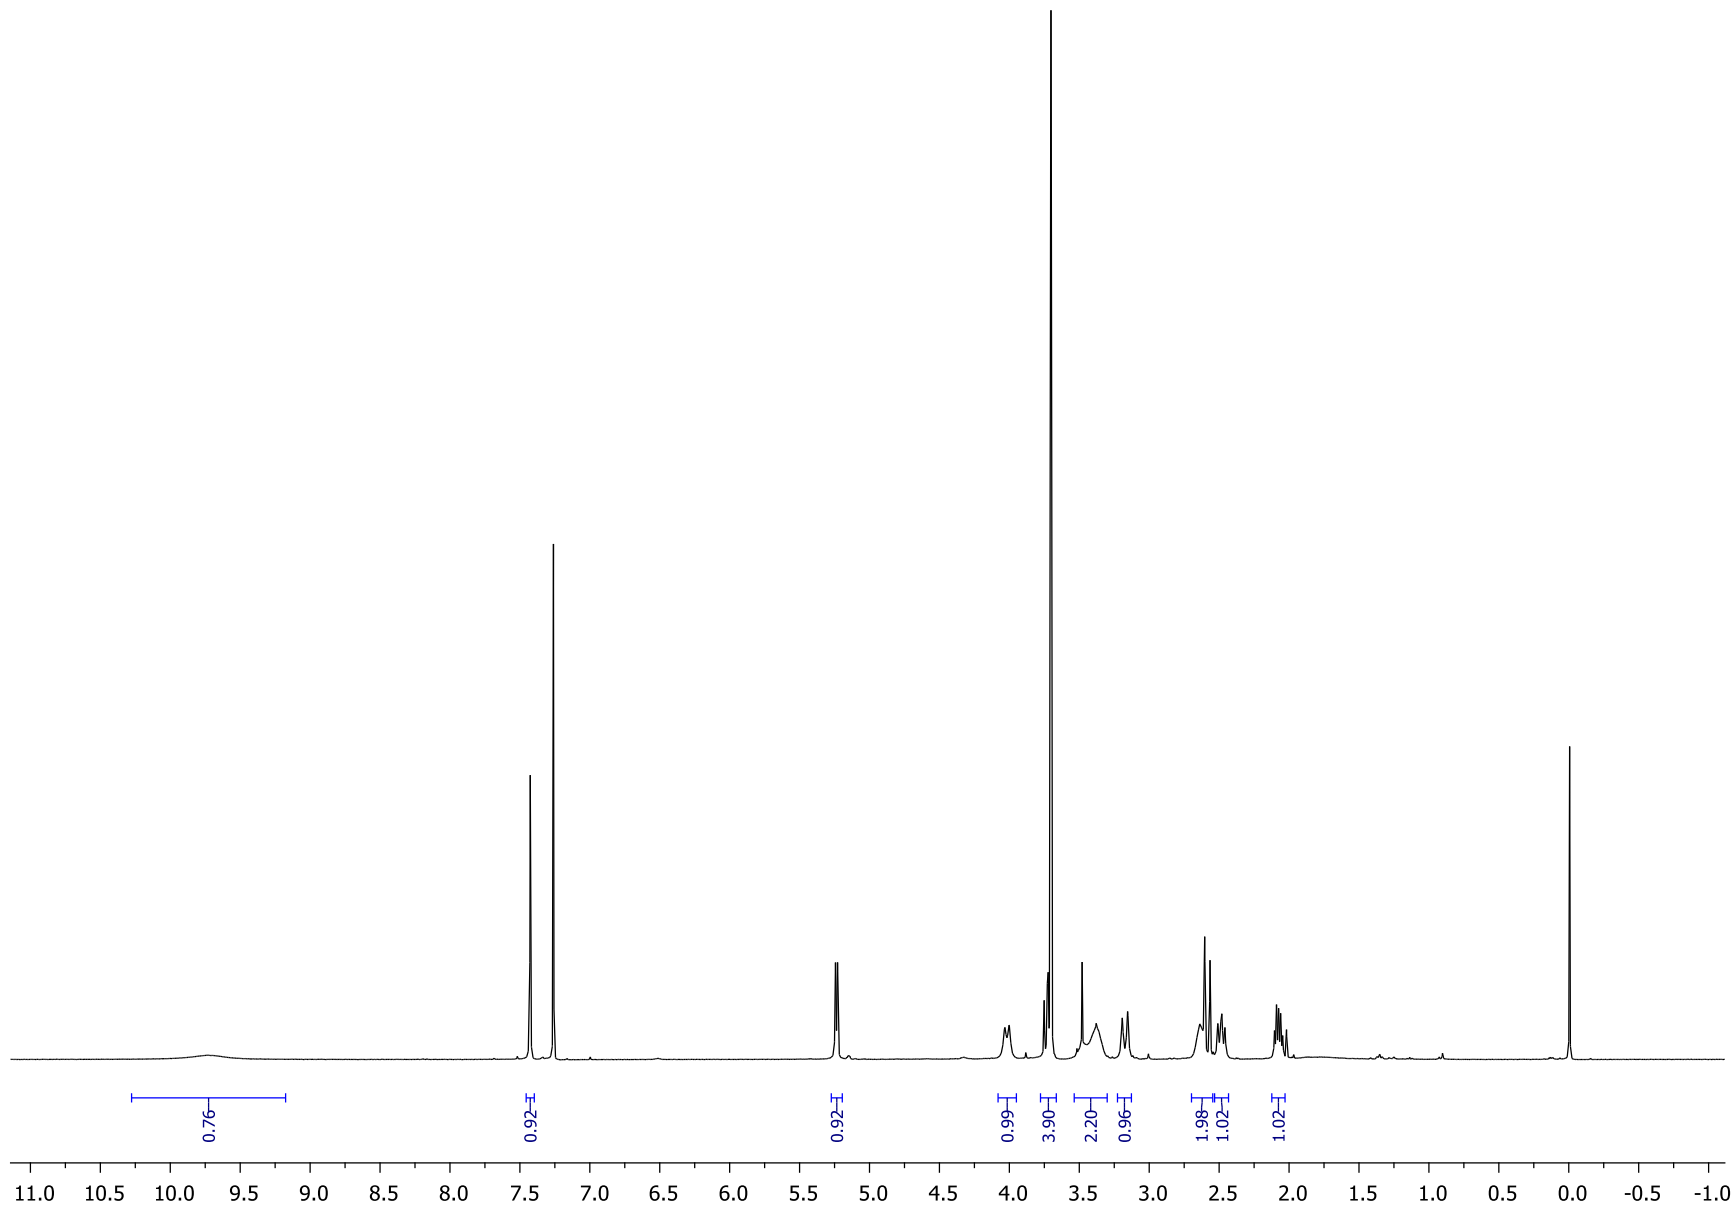

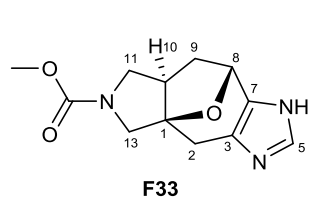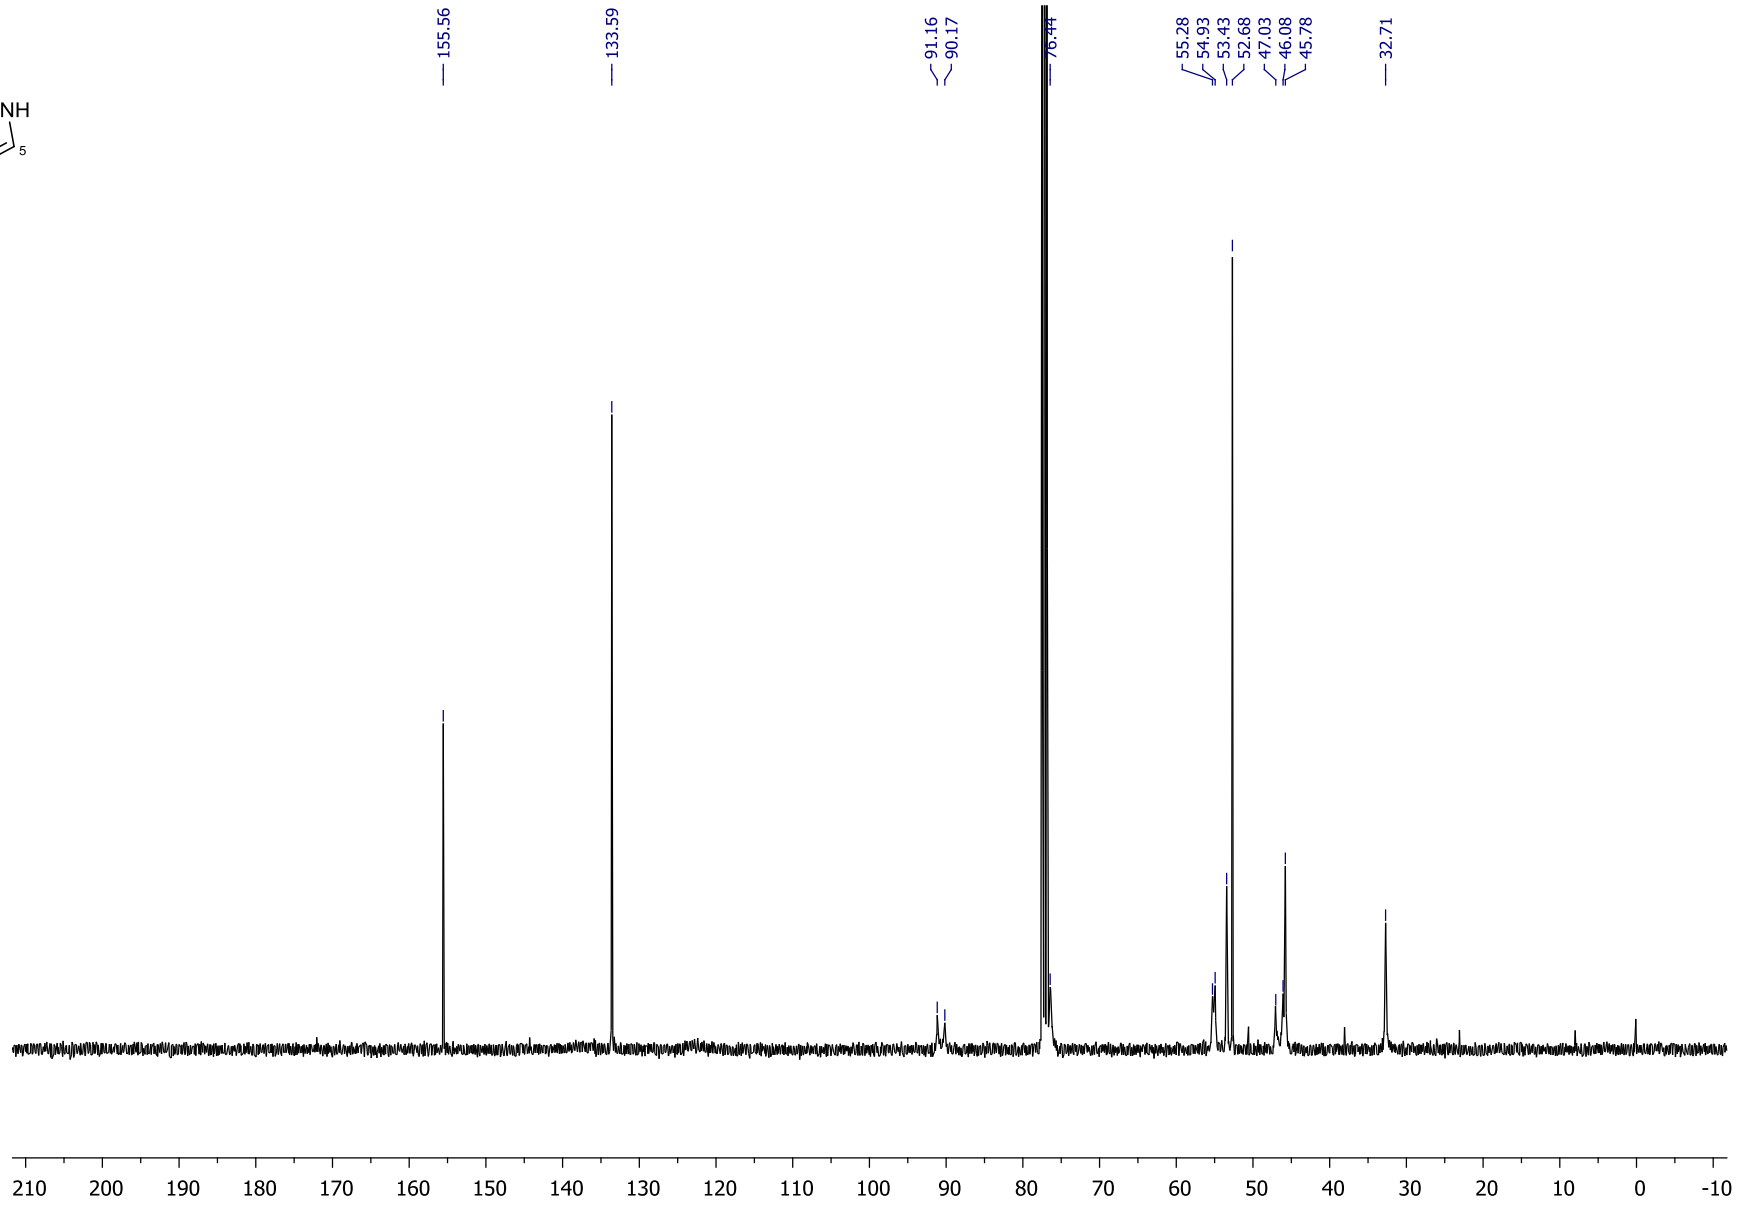

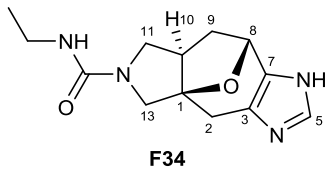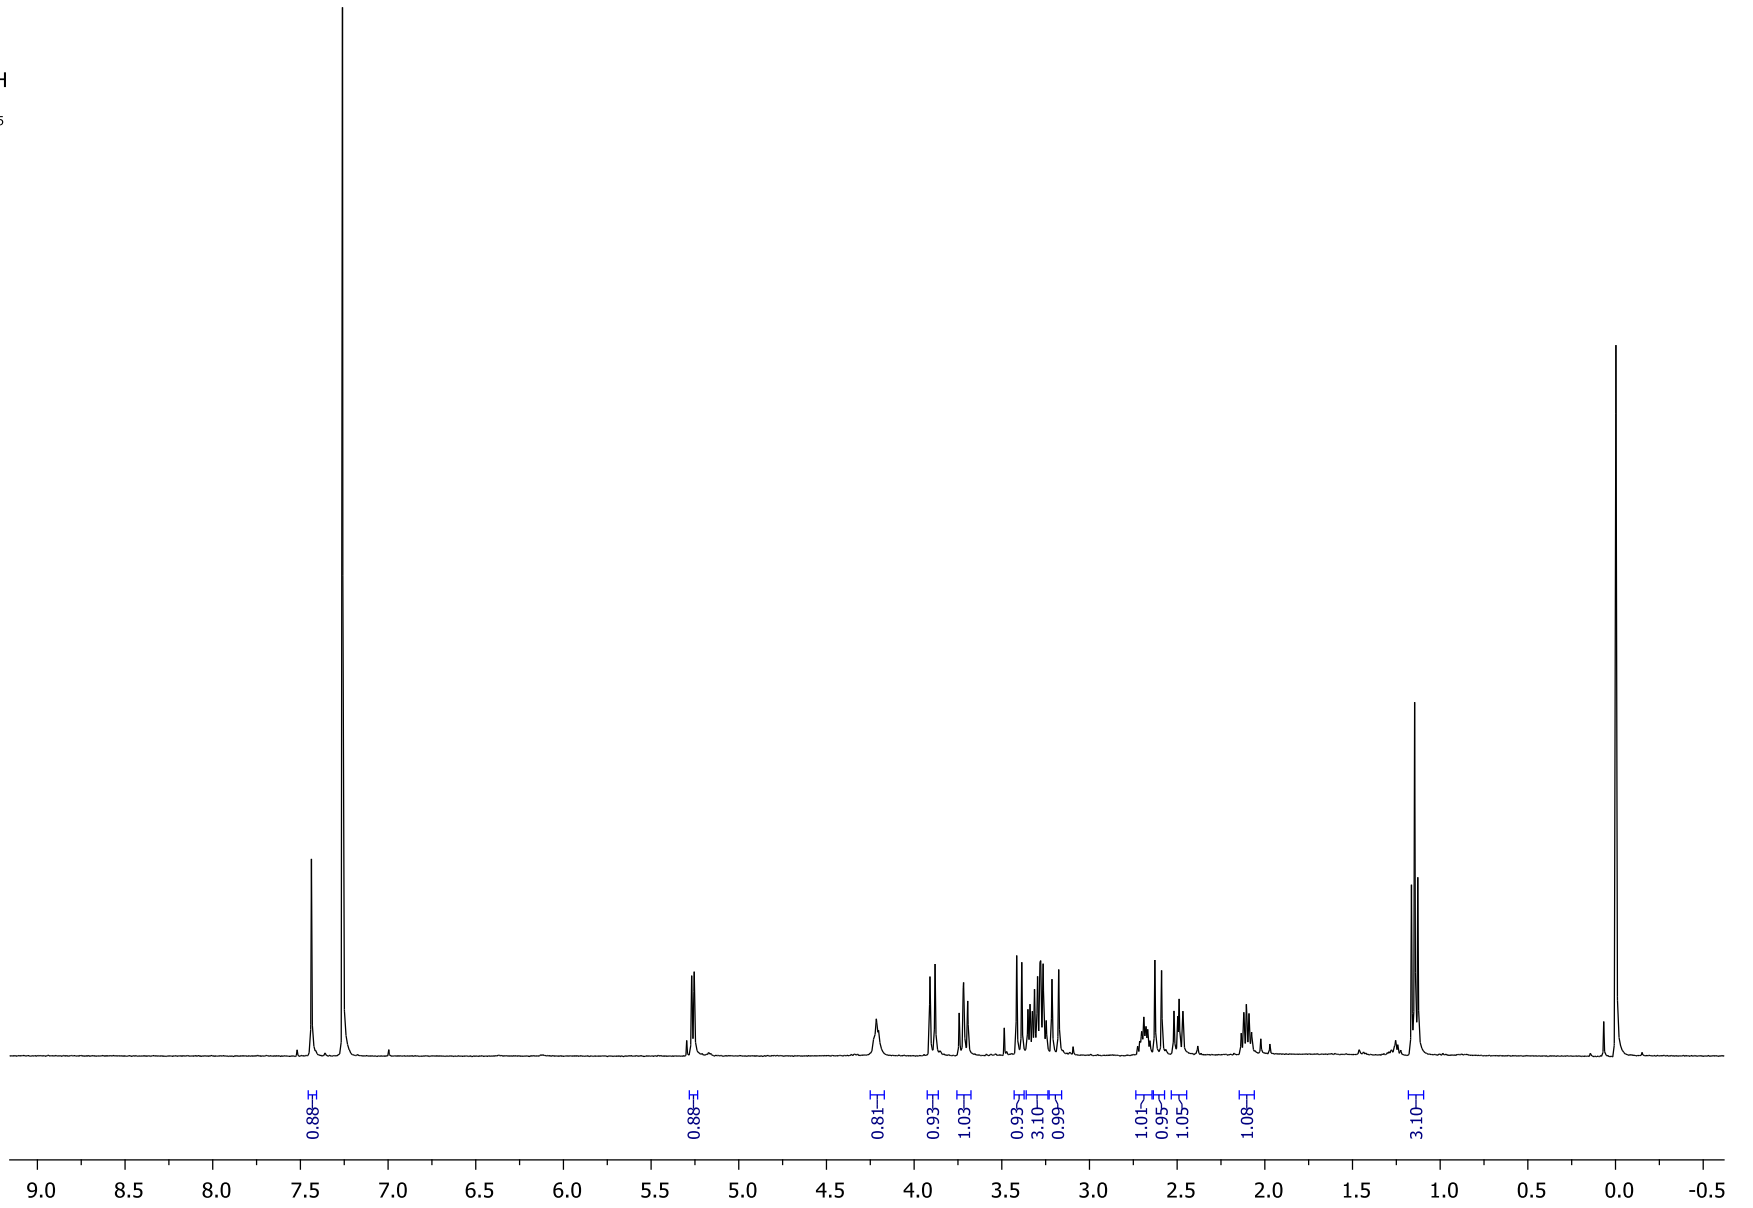

384

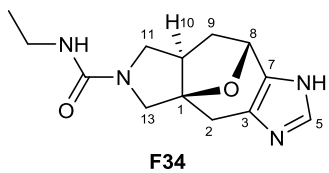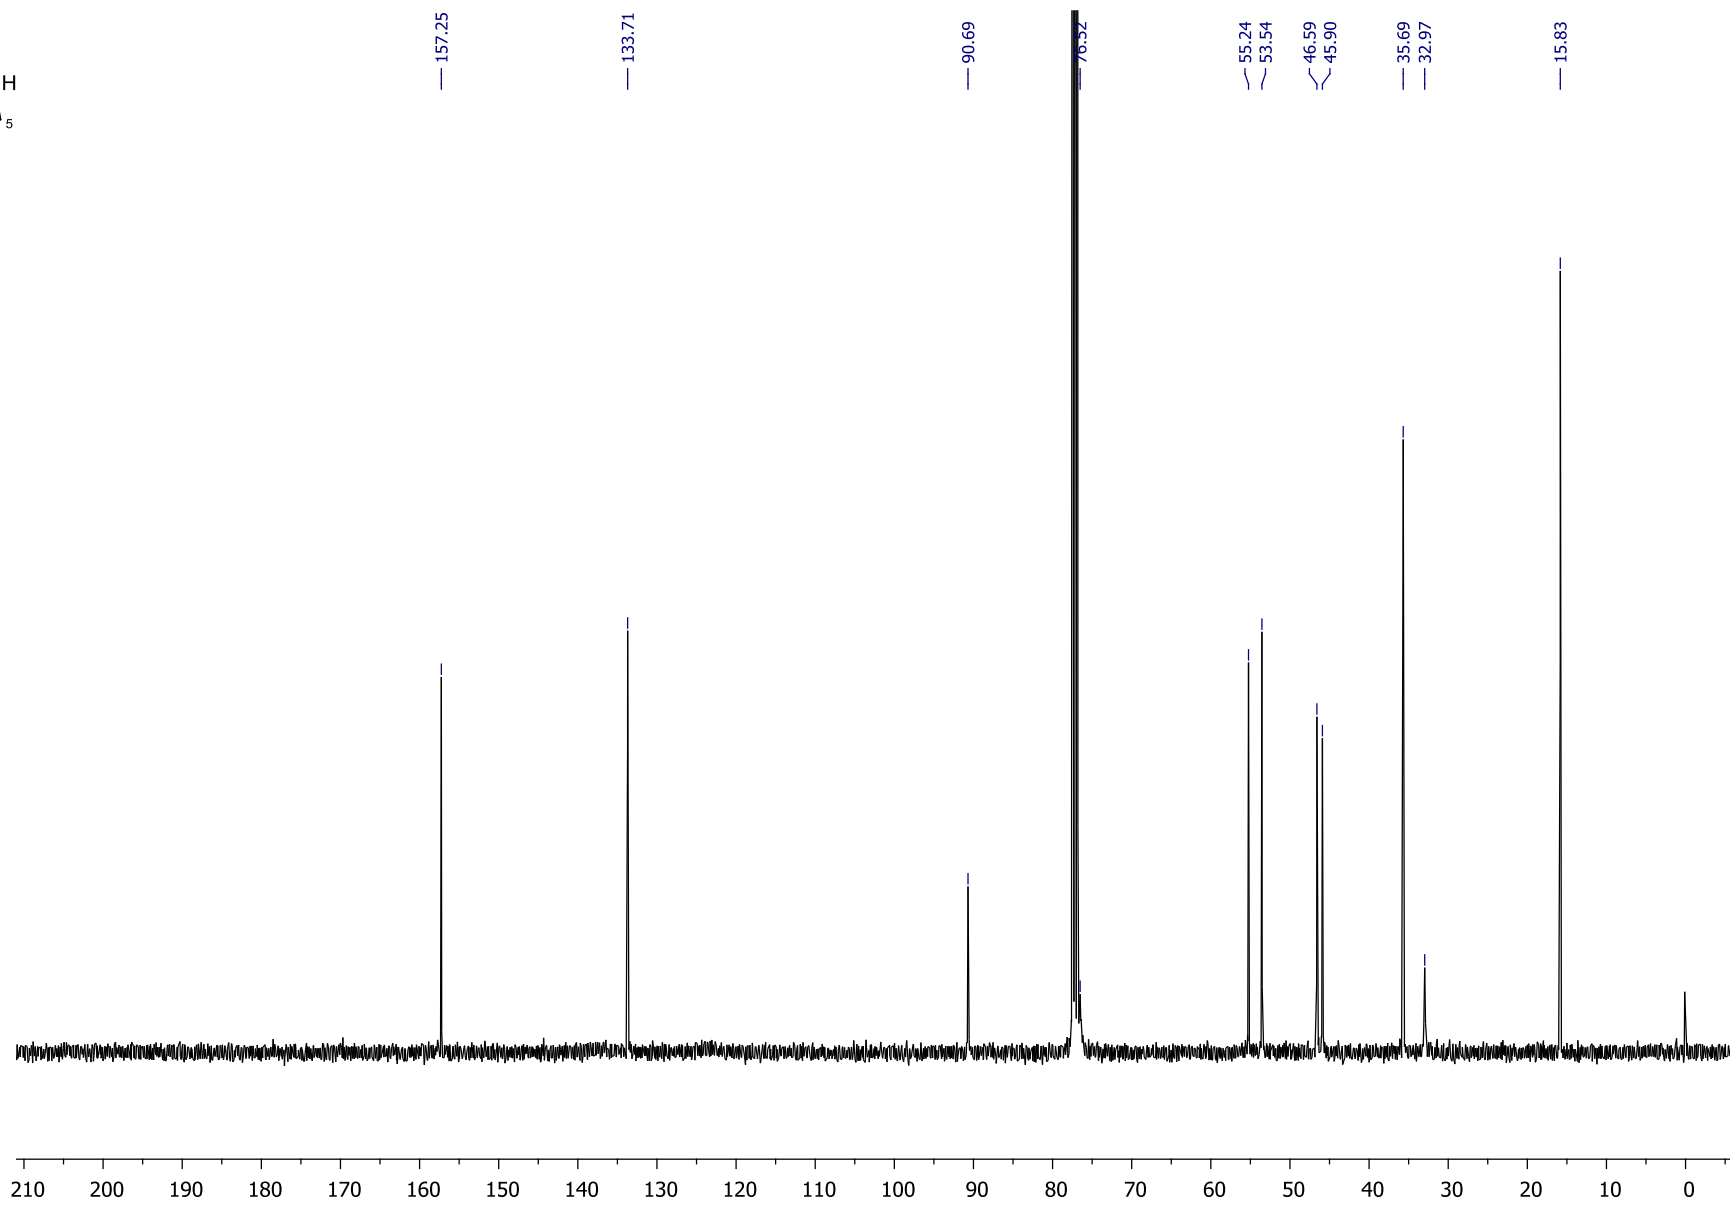

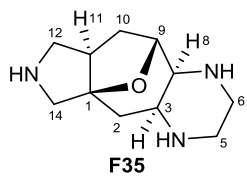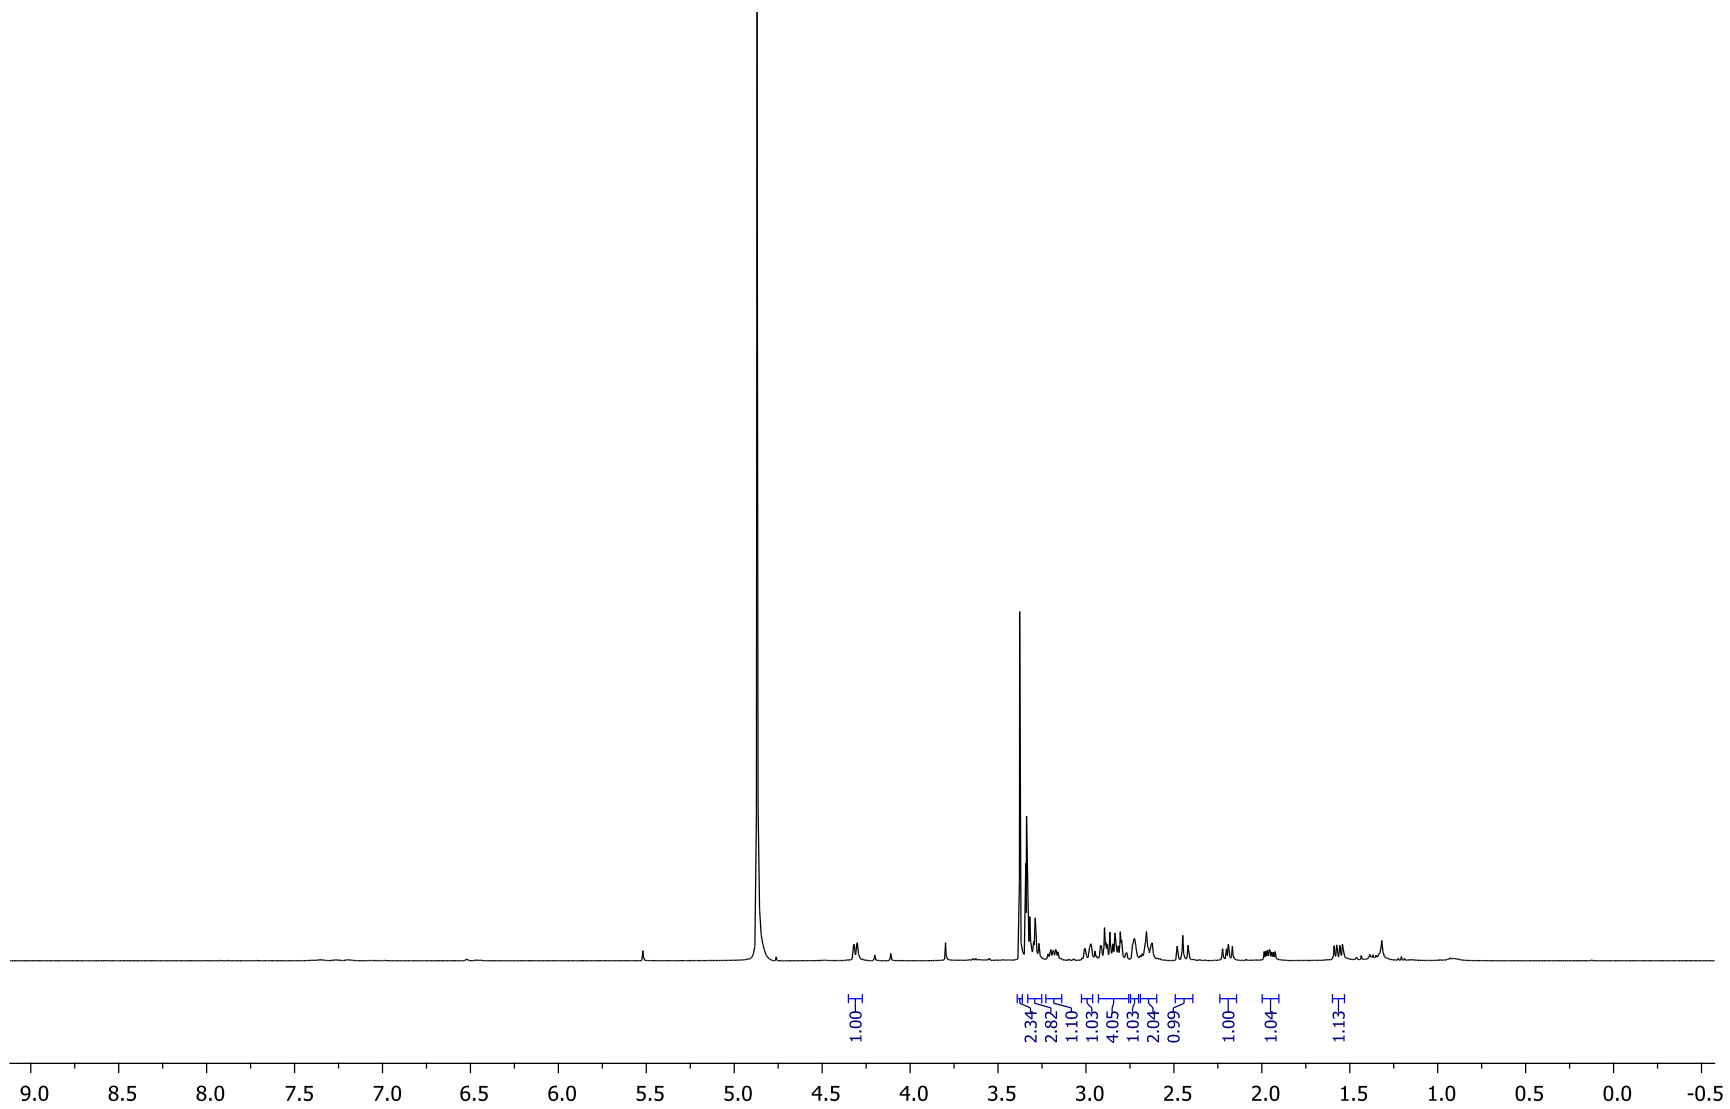

386

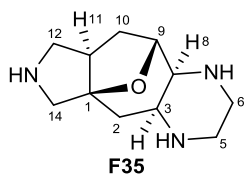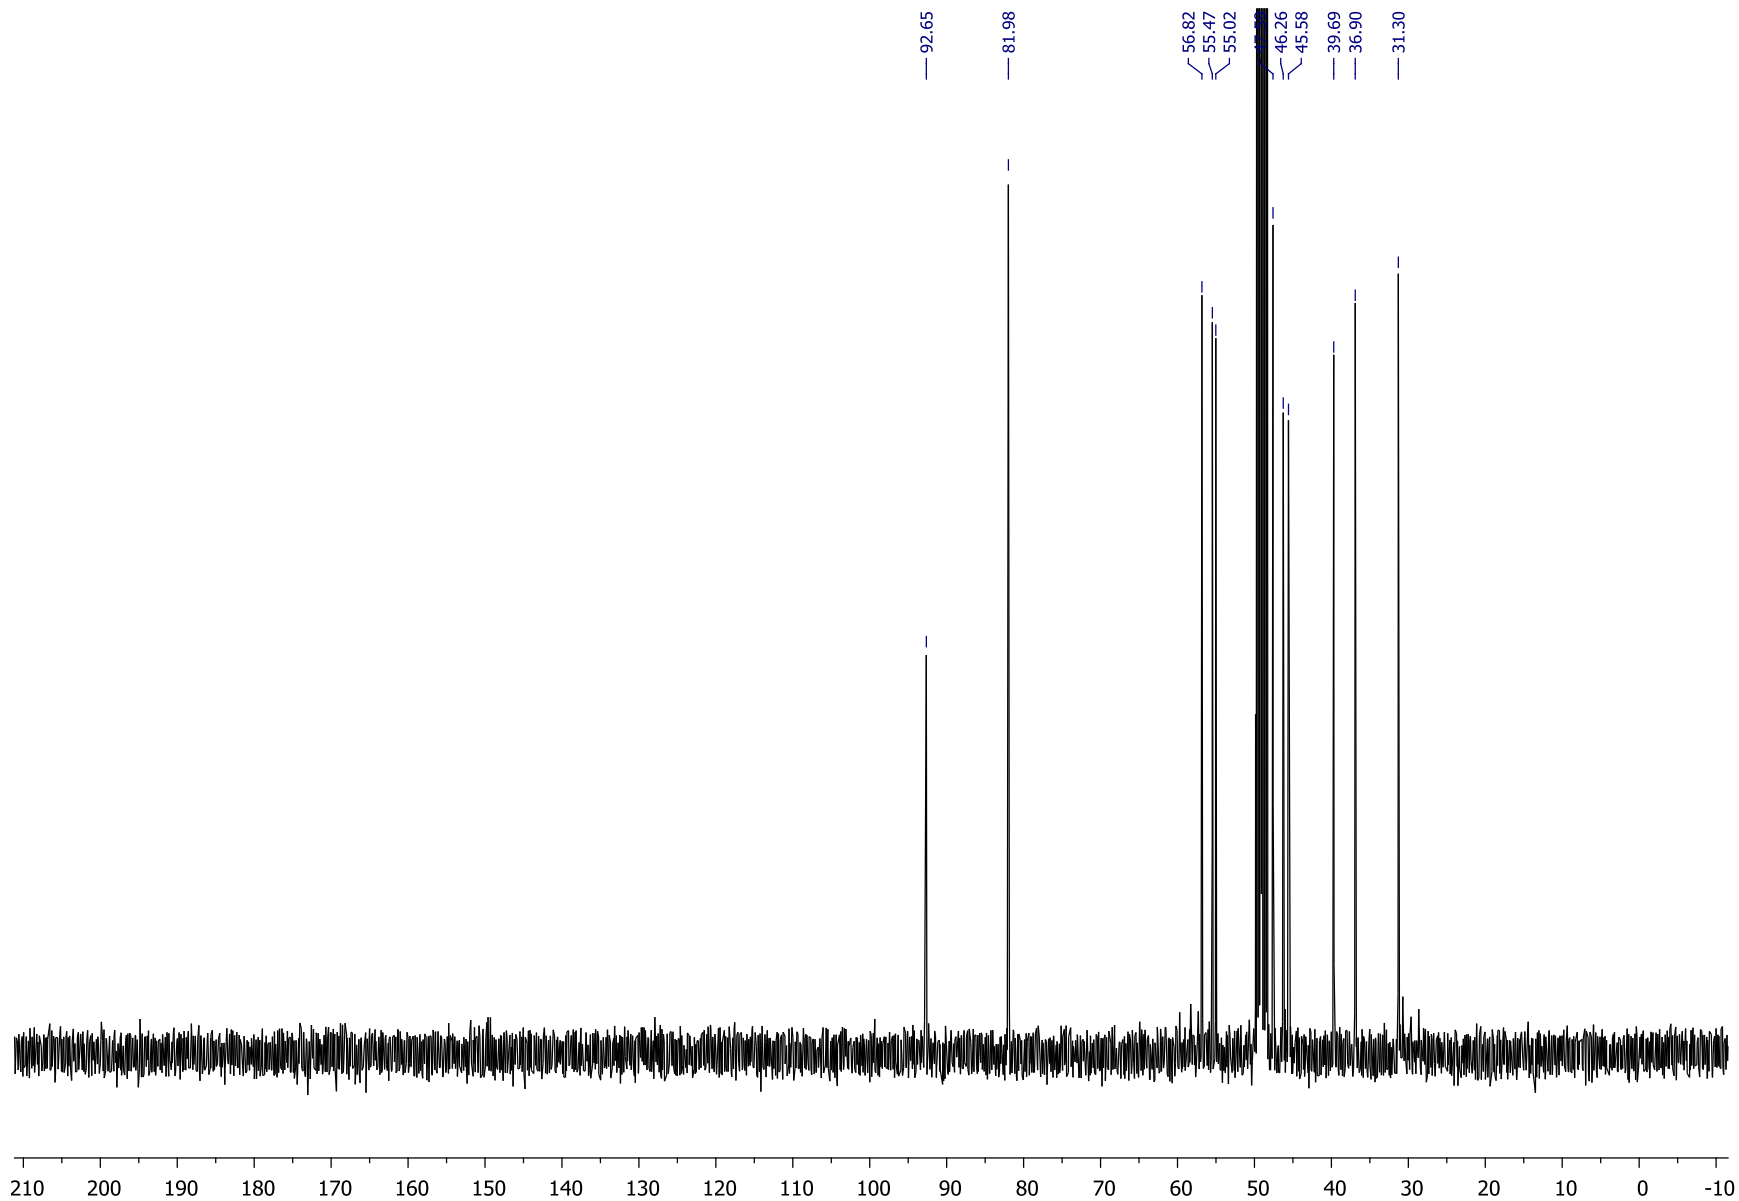



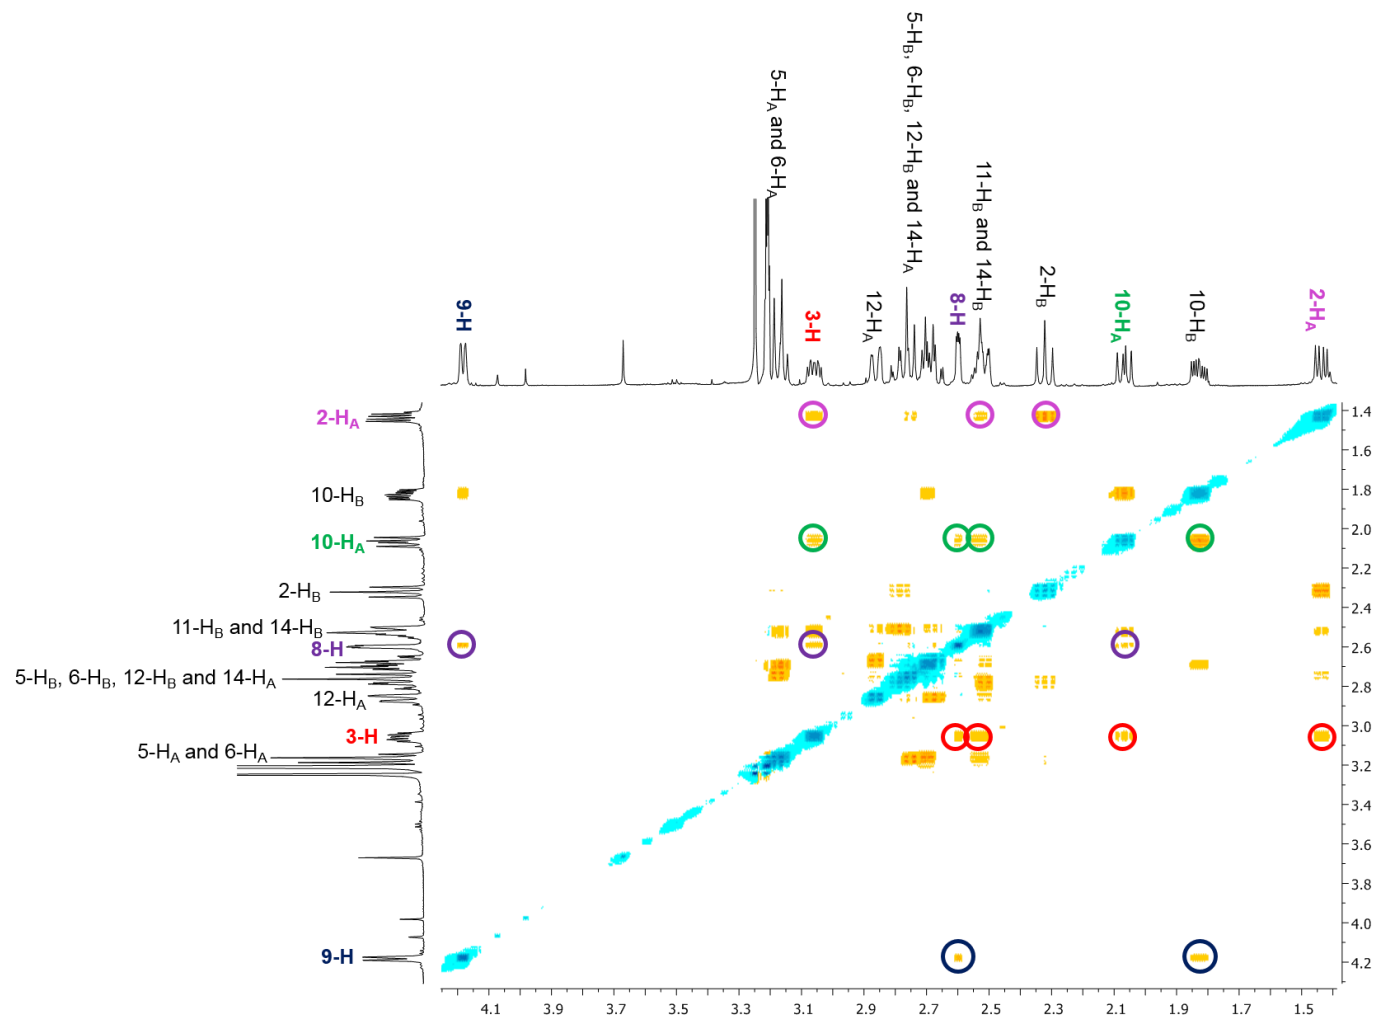

**F35 NOESY correlations:**

**2-H<sub>A</sub>:** 2-H<sub>B</sub>, 3-H, 11-H

**3-H:** 2-H<sub>A</sub>, 8-H, 10-H<sub>A</sub>, 11-H

**8-H:** 3-H, 9-H, 10-H<sub>A</sub>

**9-H:** 8-H and 10-H<sub>B</sub>

**10-H<sub>A</sub>:** 3-H, 8-H, 10-H<sub>B</sub>, 11-H

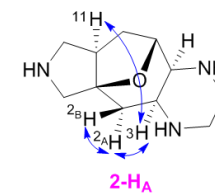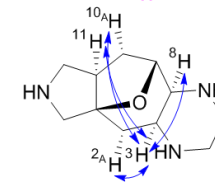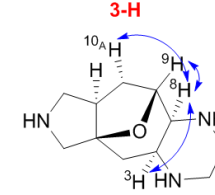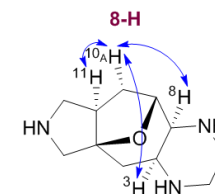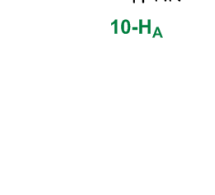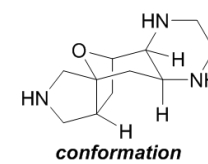

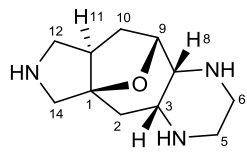

F36

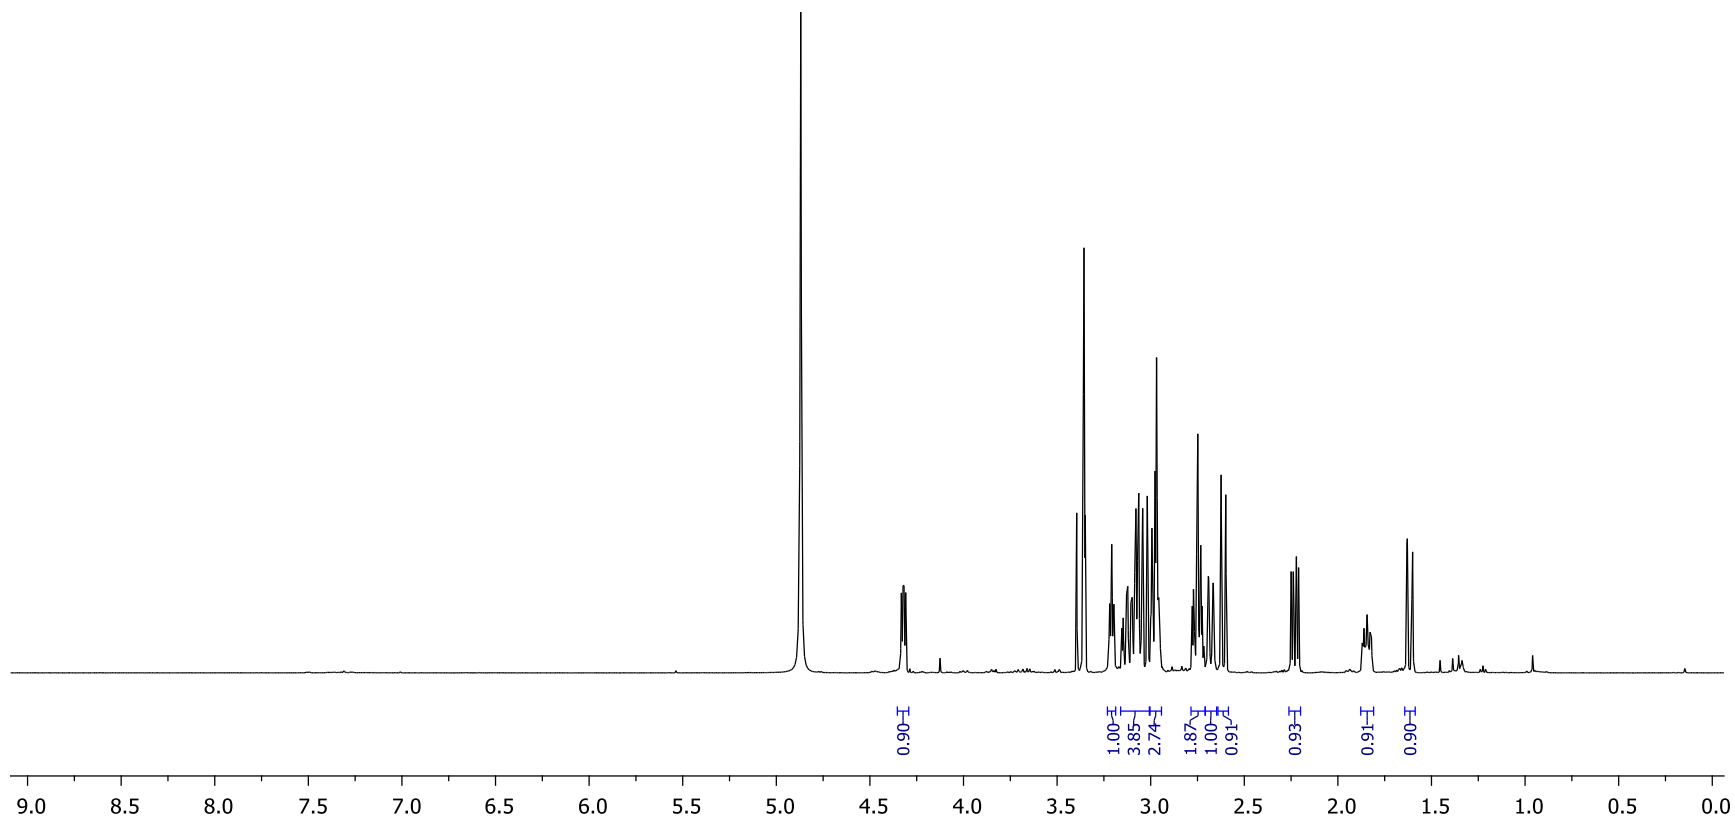

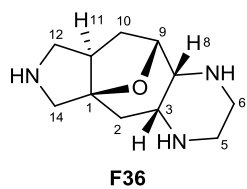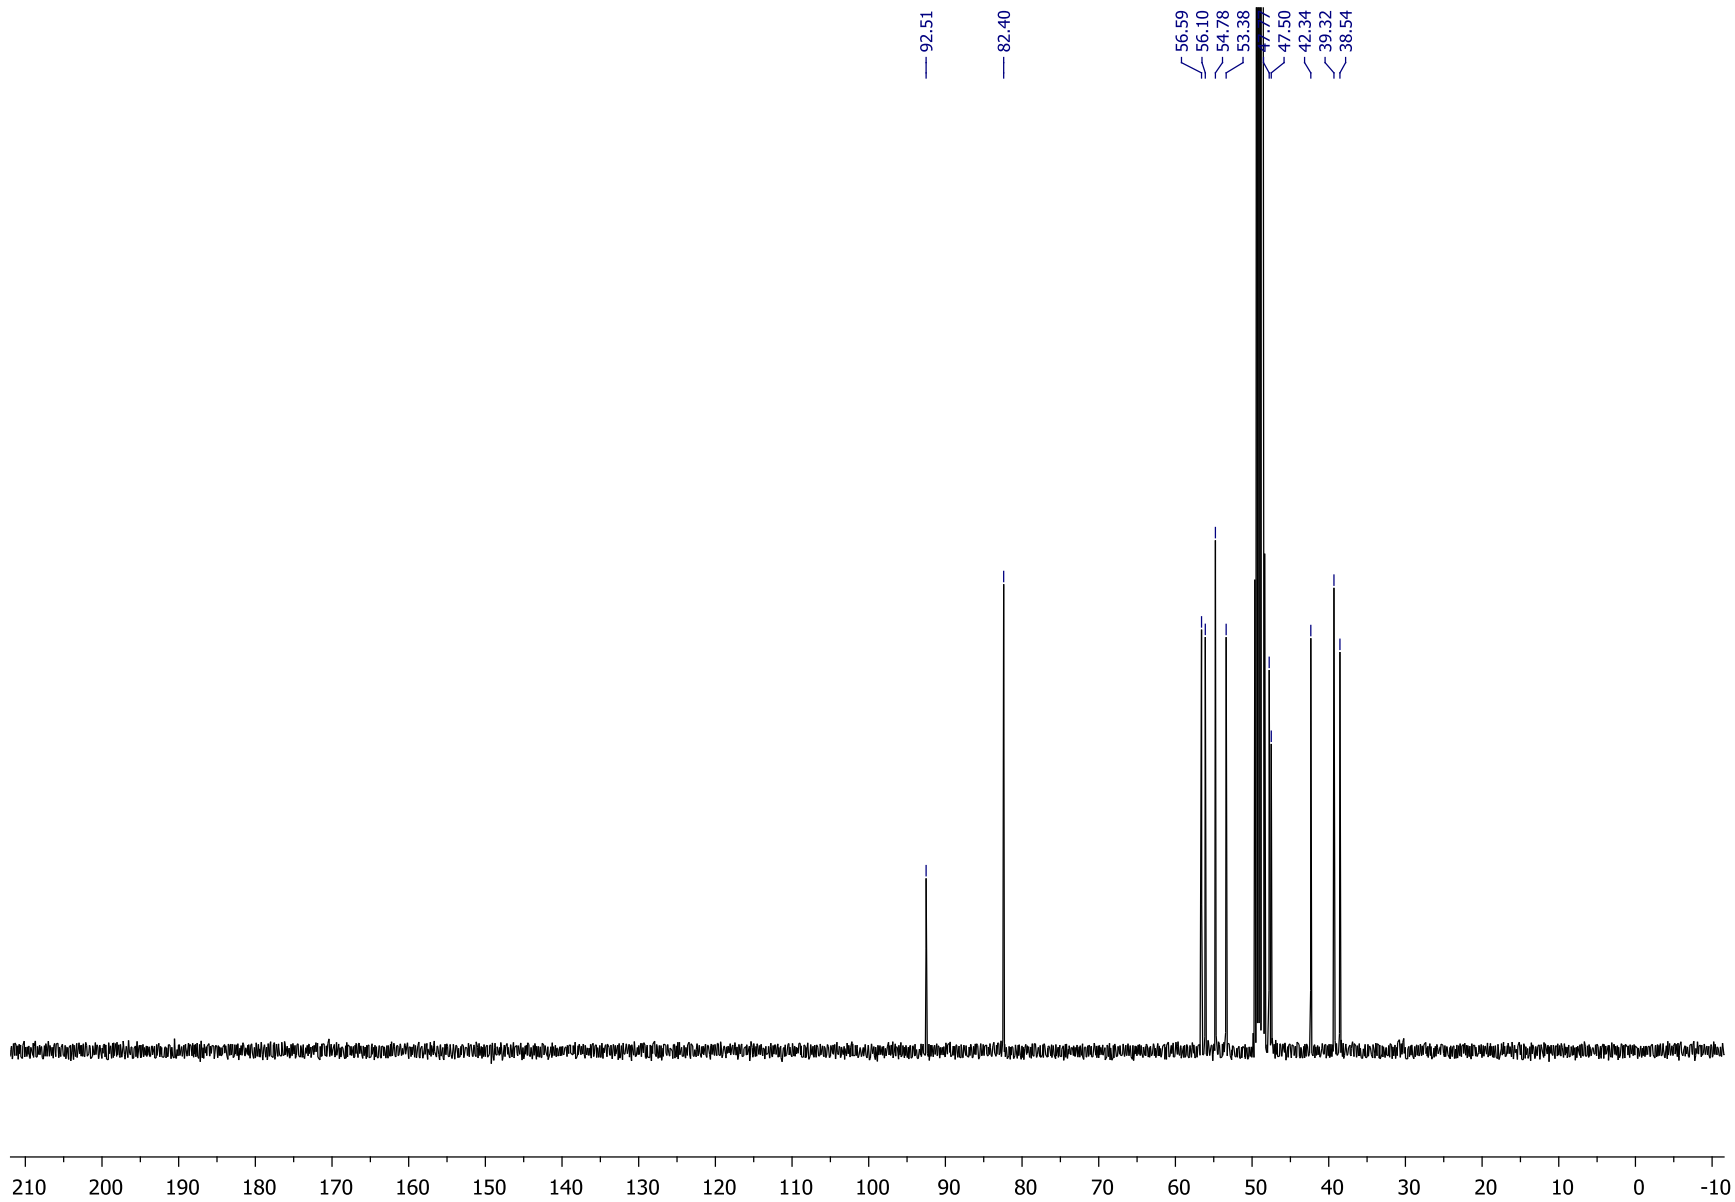

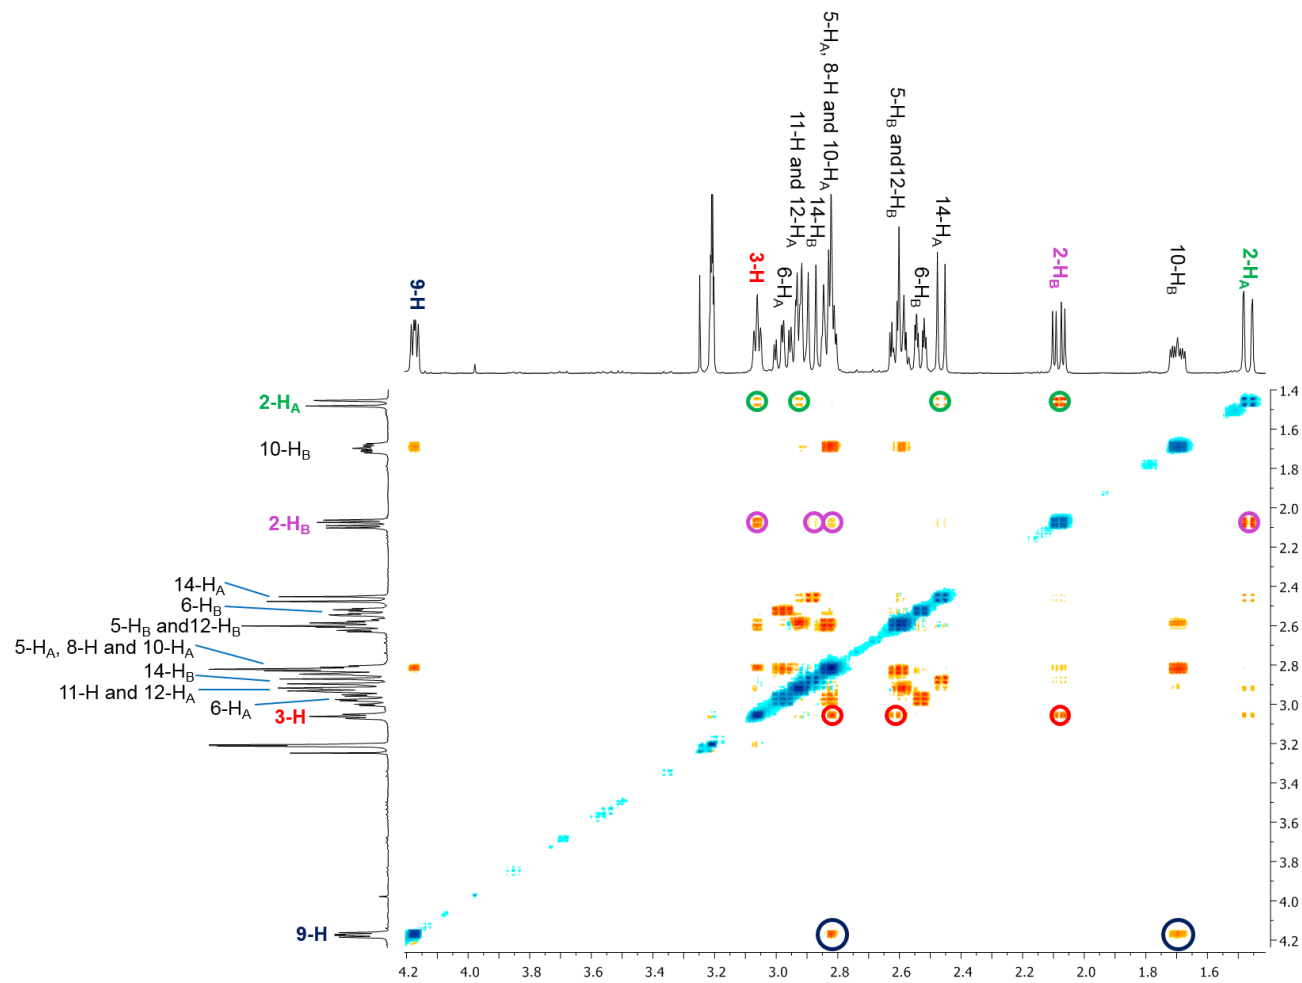

**F36 NOESY correlations:**

**2-H<sub>A</sub>:** 2-H<sub>B</sub>, 3-H, 11-H, 14-H<sub>A</sub>

**2-H<sub>B</sub>:** 2-H<sub>A</sub>, 3-H, 8-H, 14-H<sub>A</sub>, 14-H<sub>B</sub>

**3-H:** 2-H<sub>A</sub>, 5-H<sub>B</sub>, 8-H

**9-H:** 8-H and 10-H<sub>B</sub>

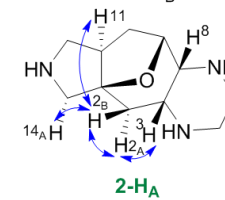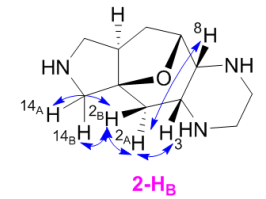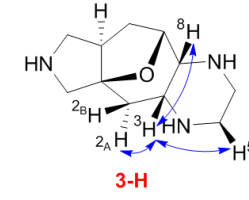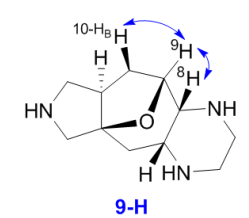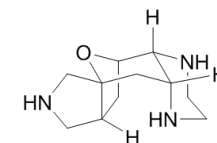

*conformational diagram*

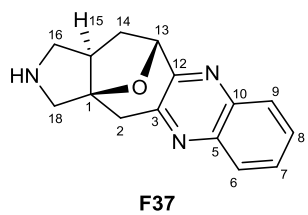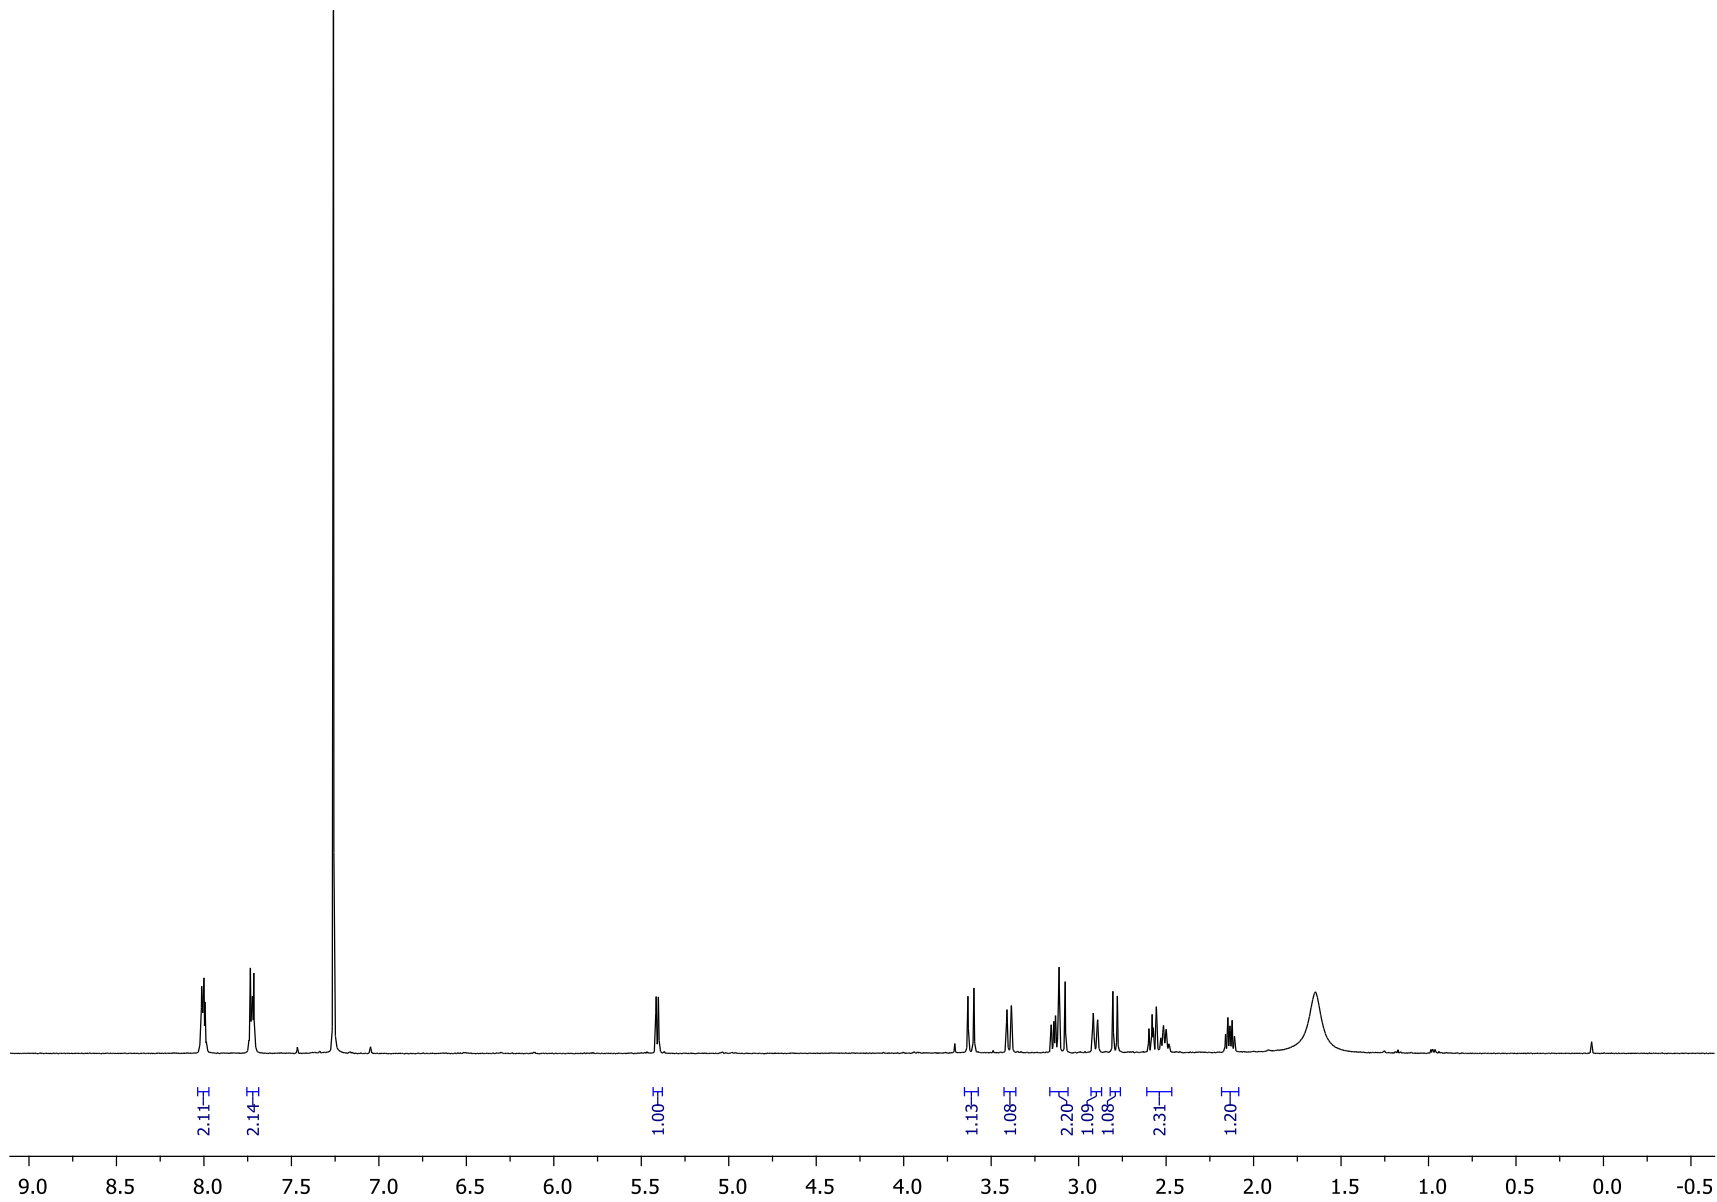

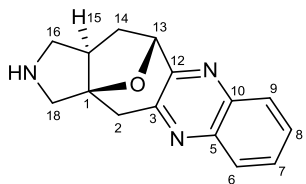

F37

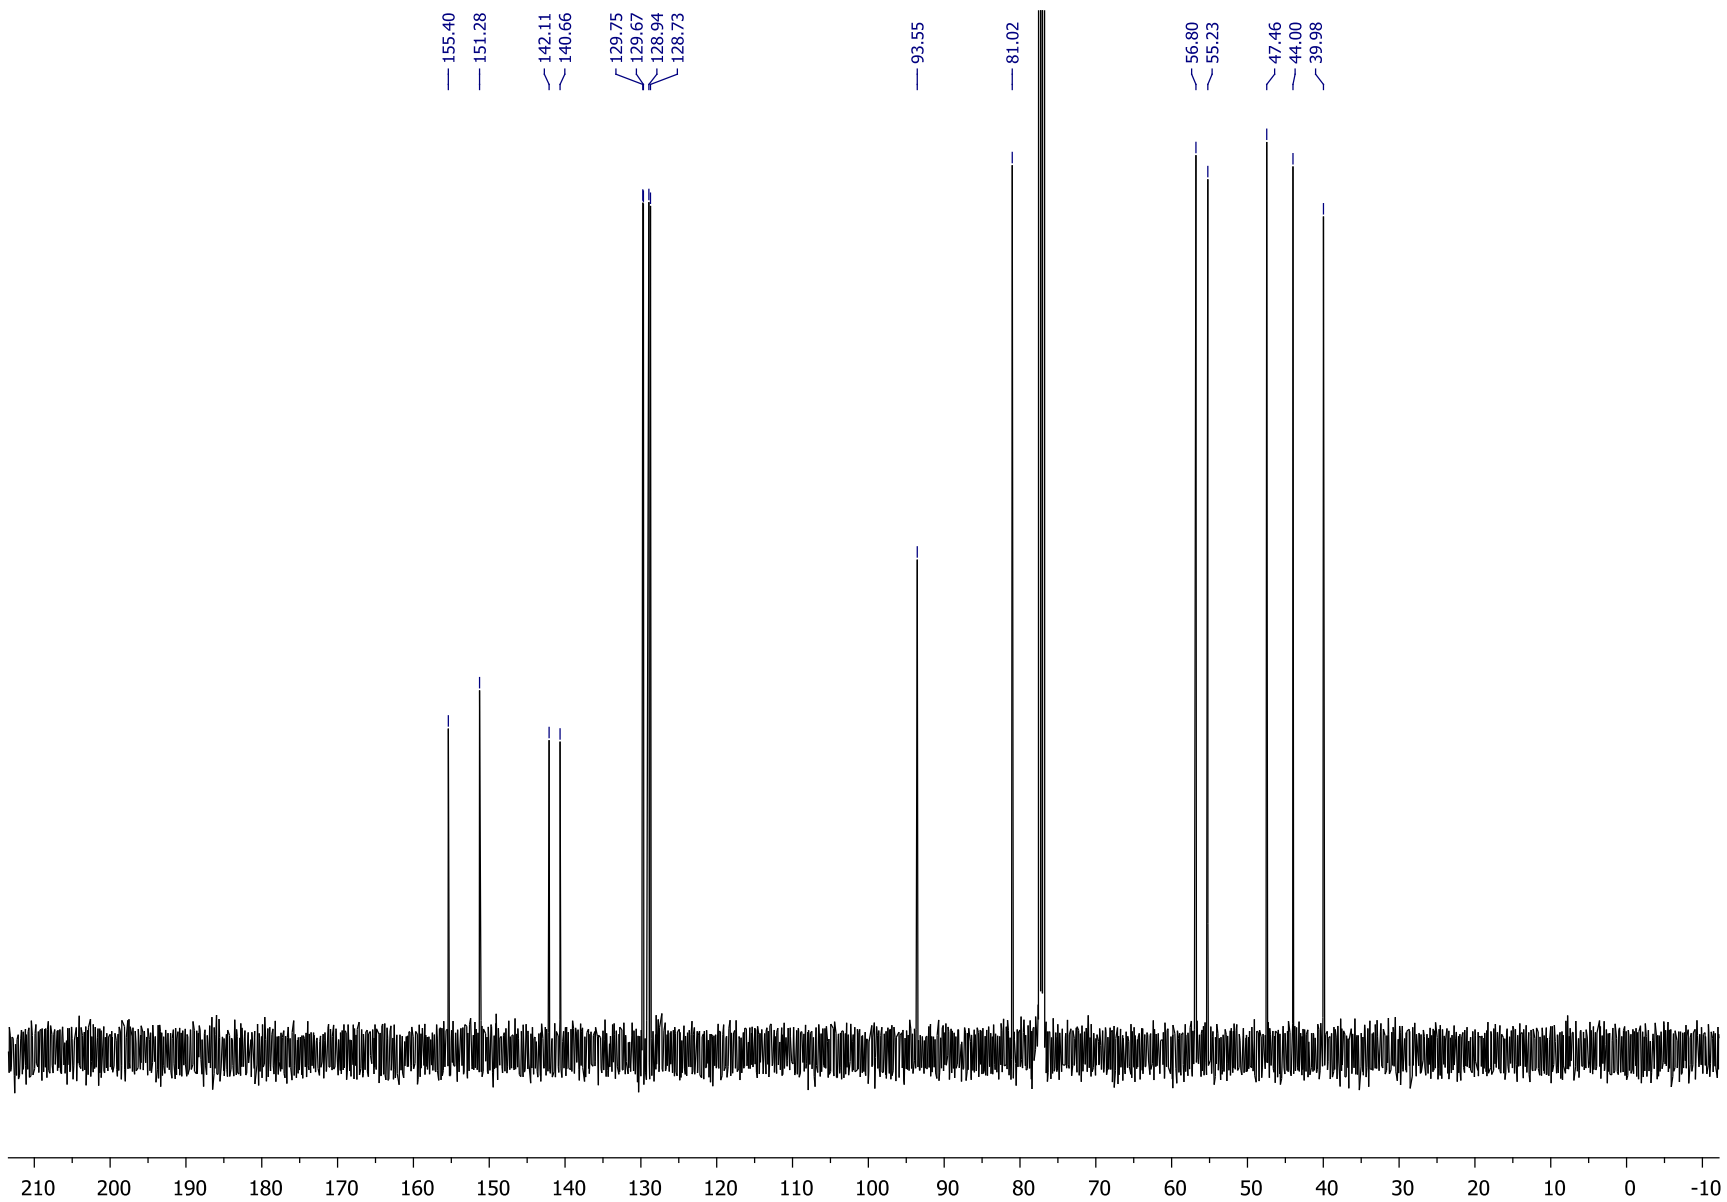

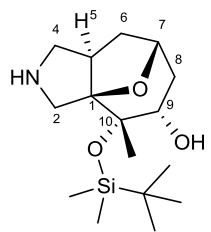

**S49**

*carried forward crude*

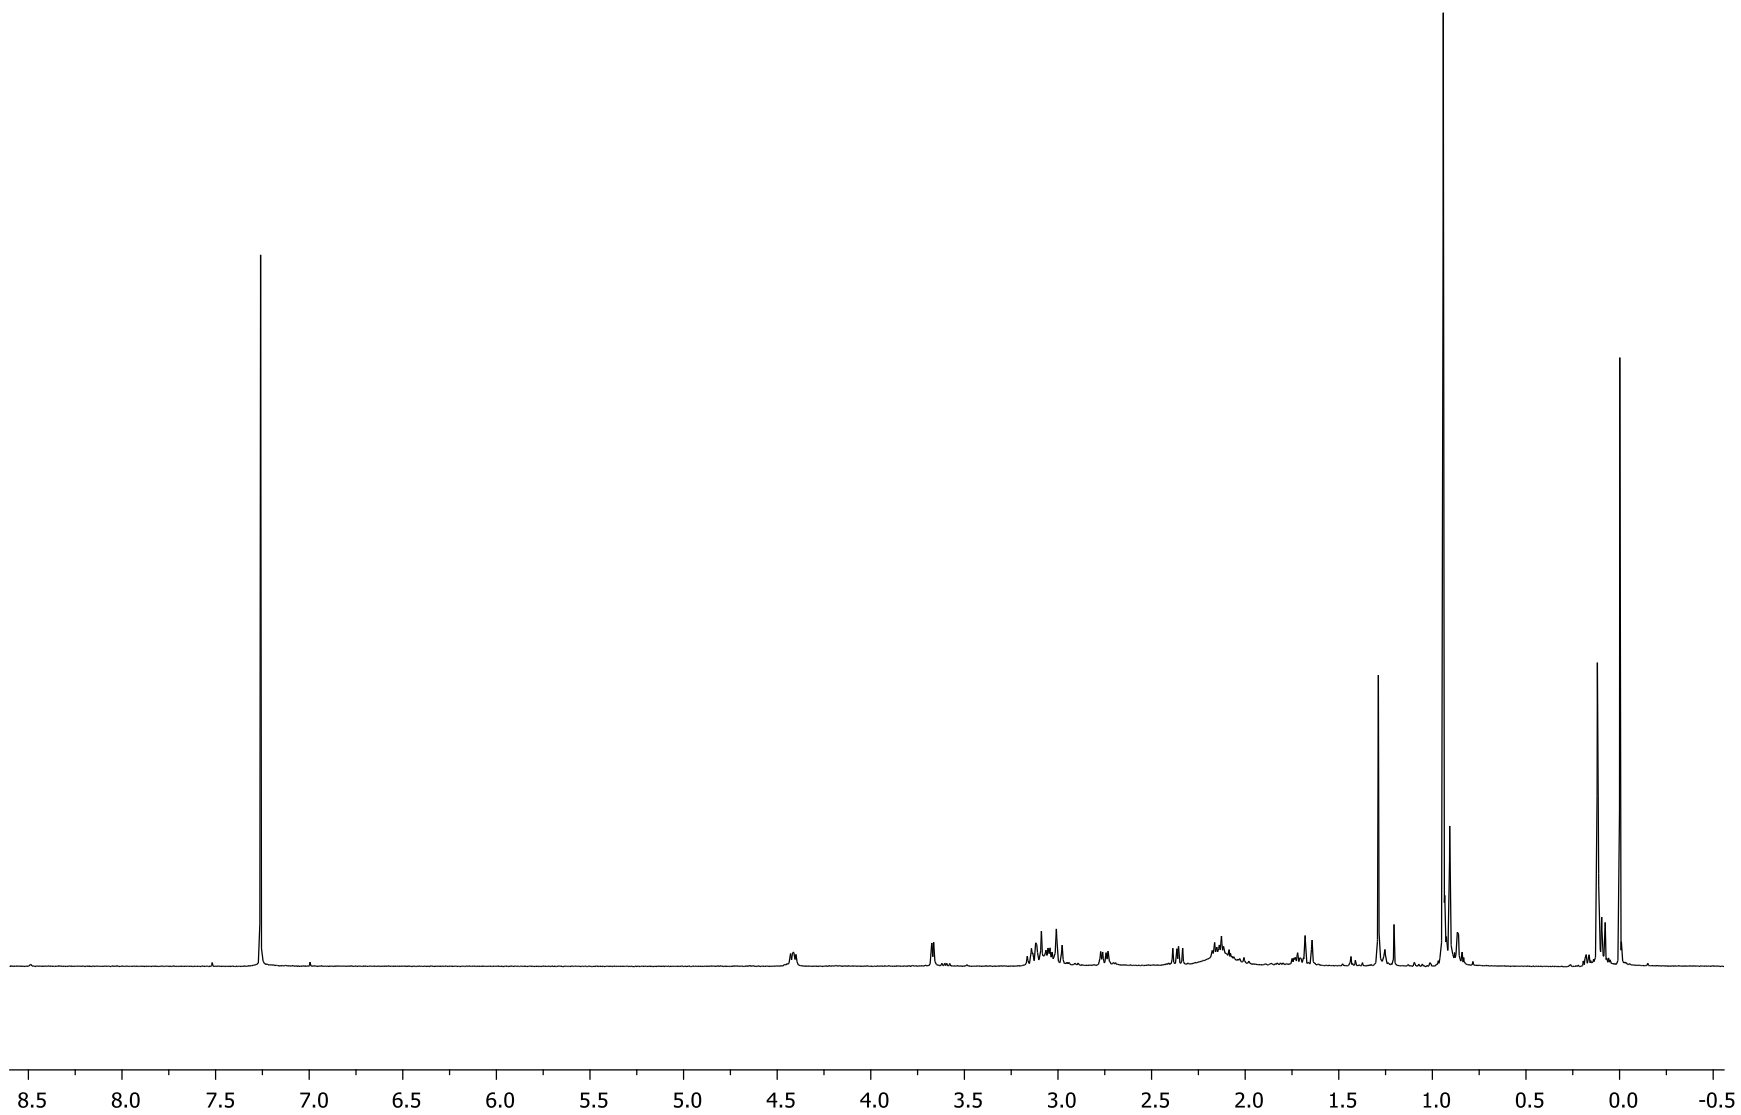

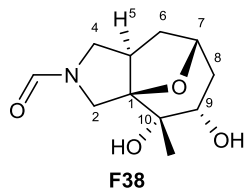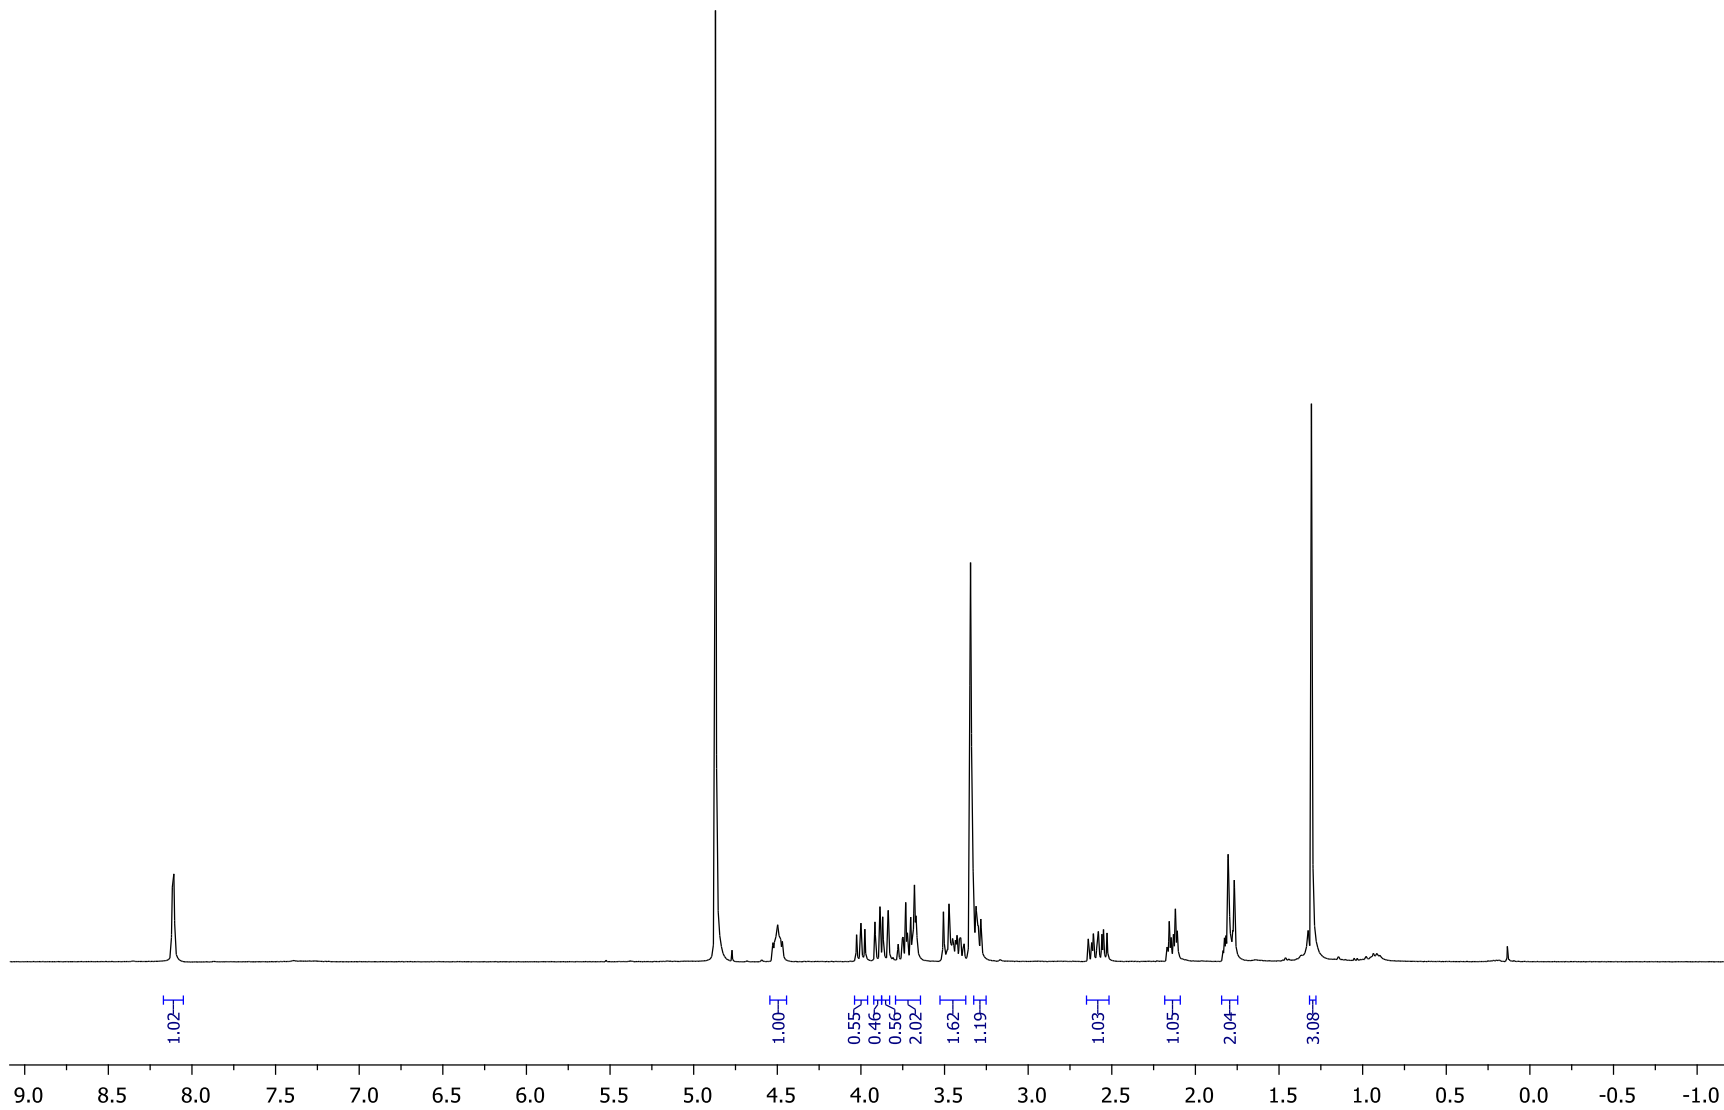



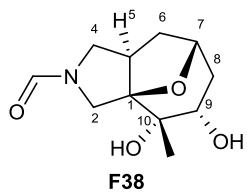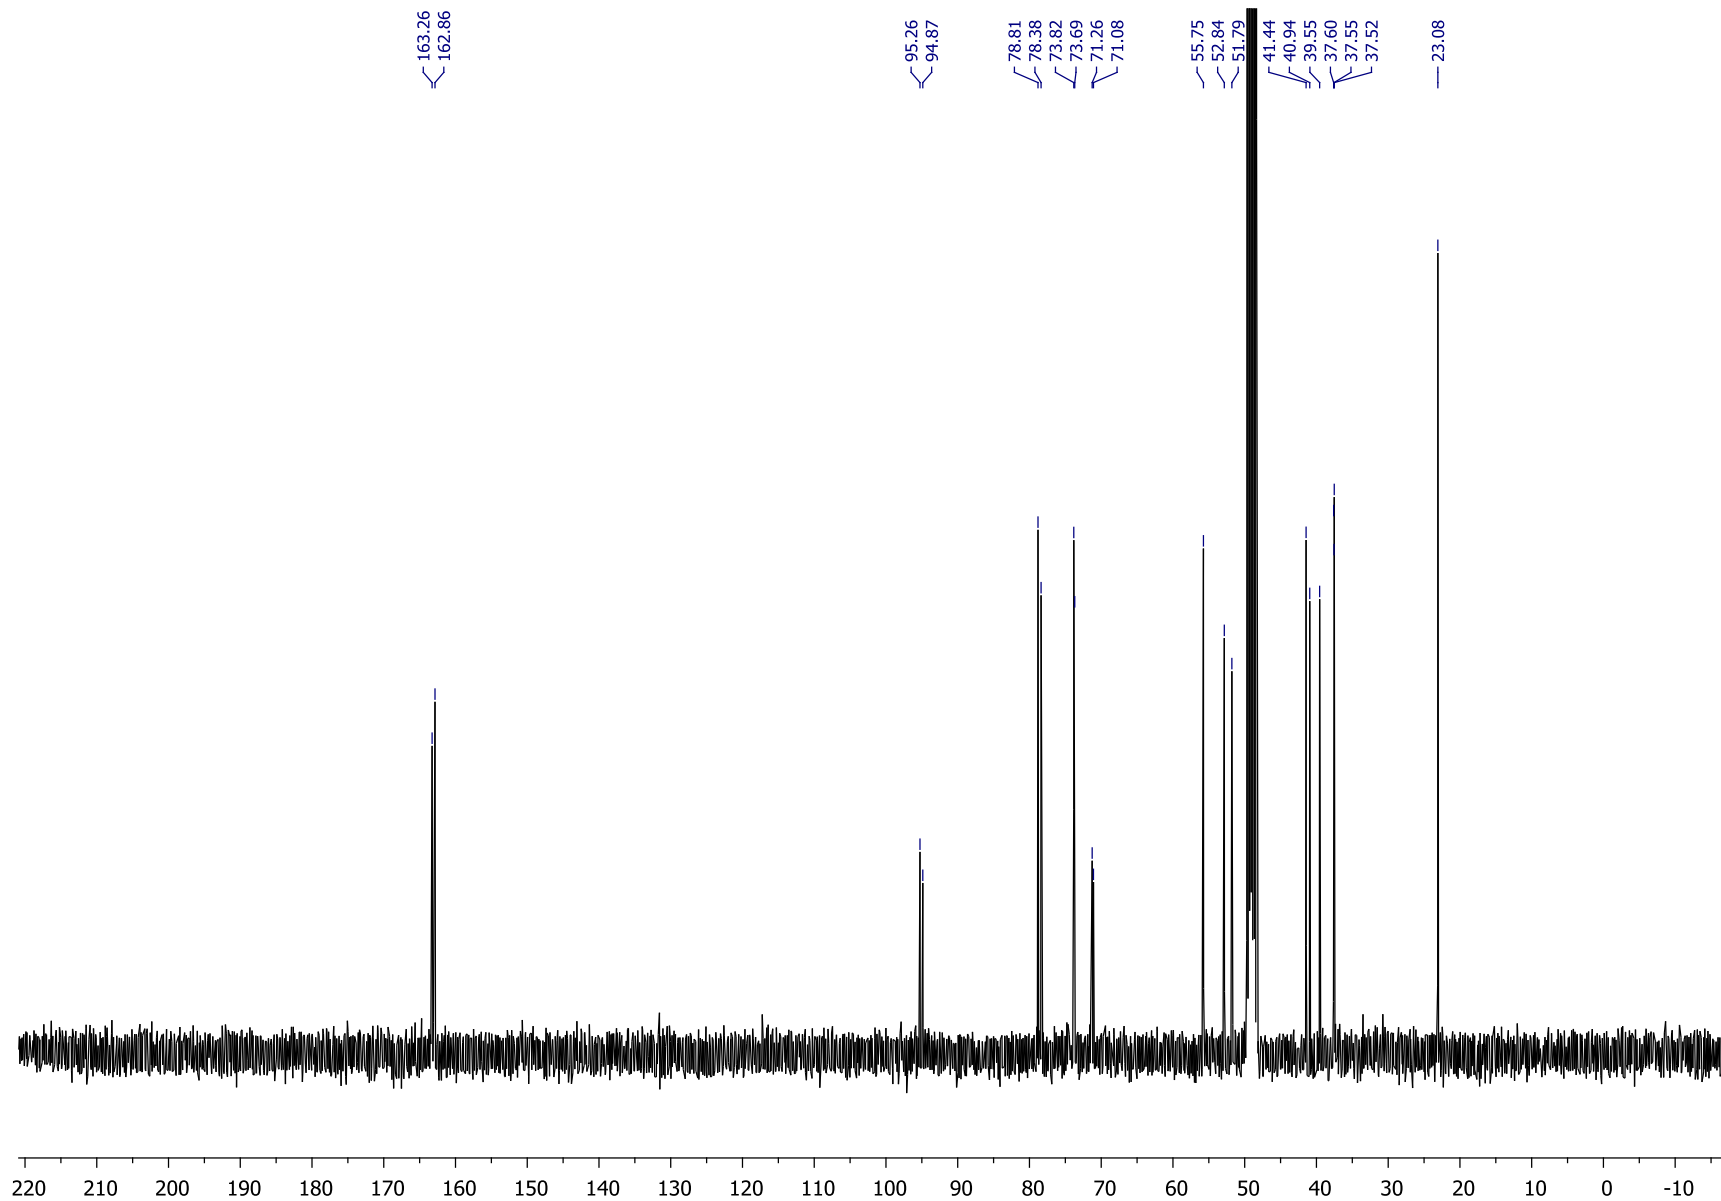

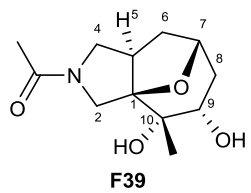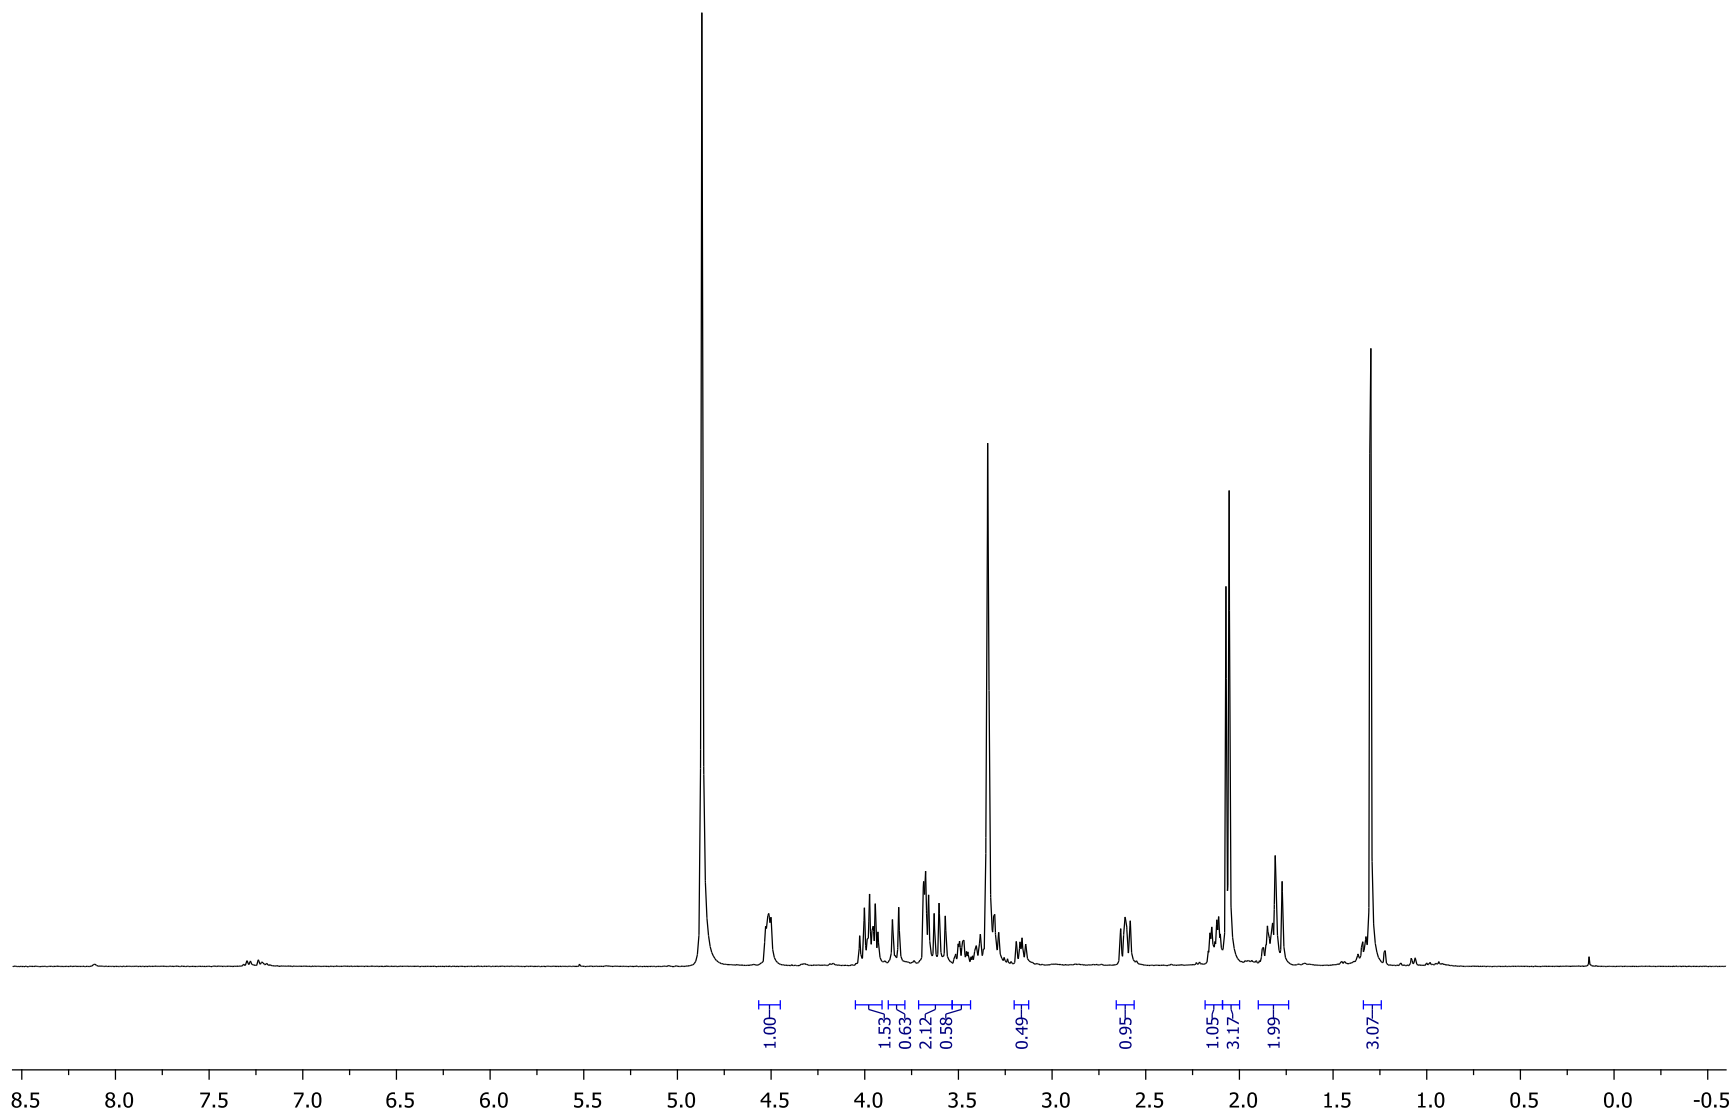

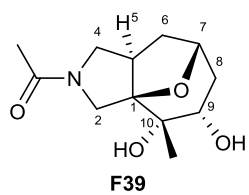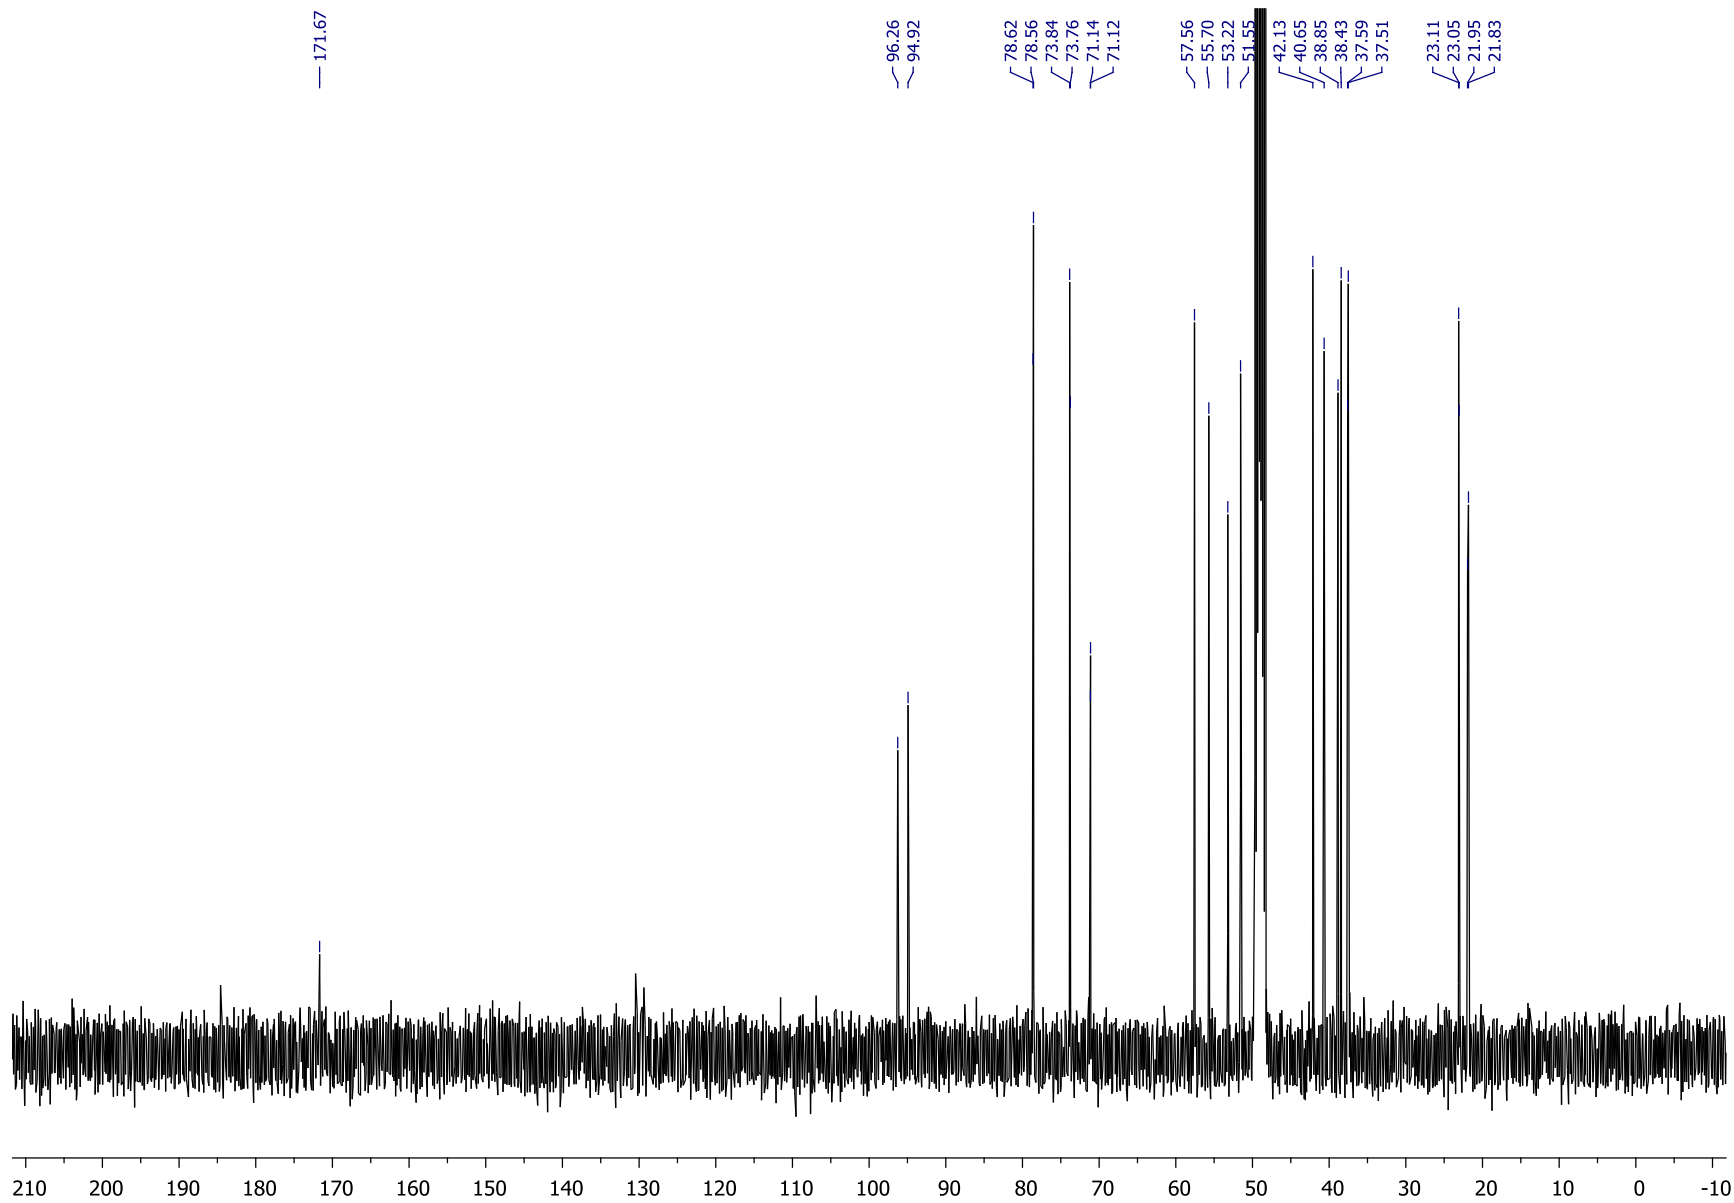

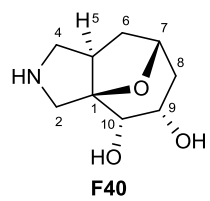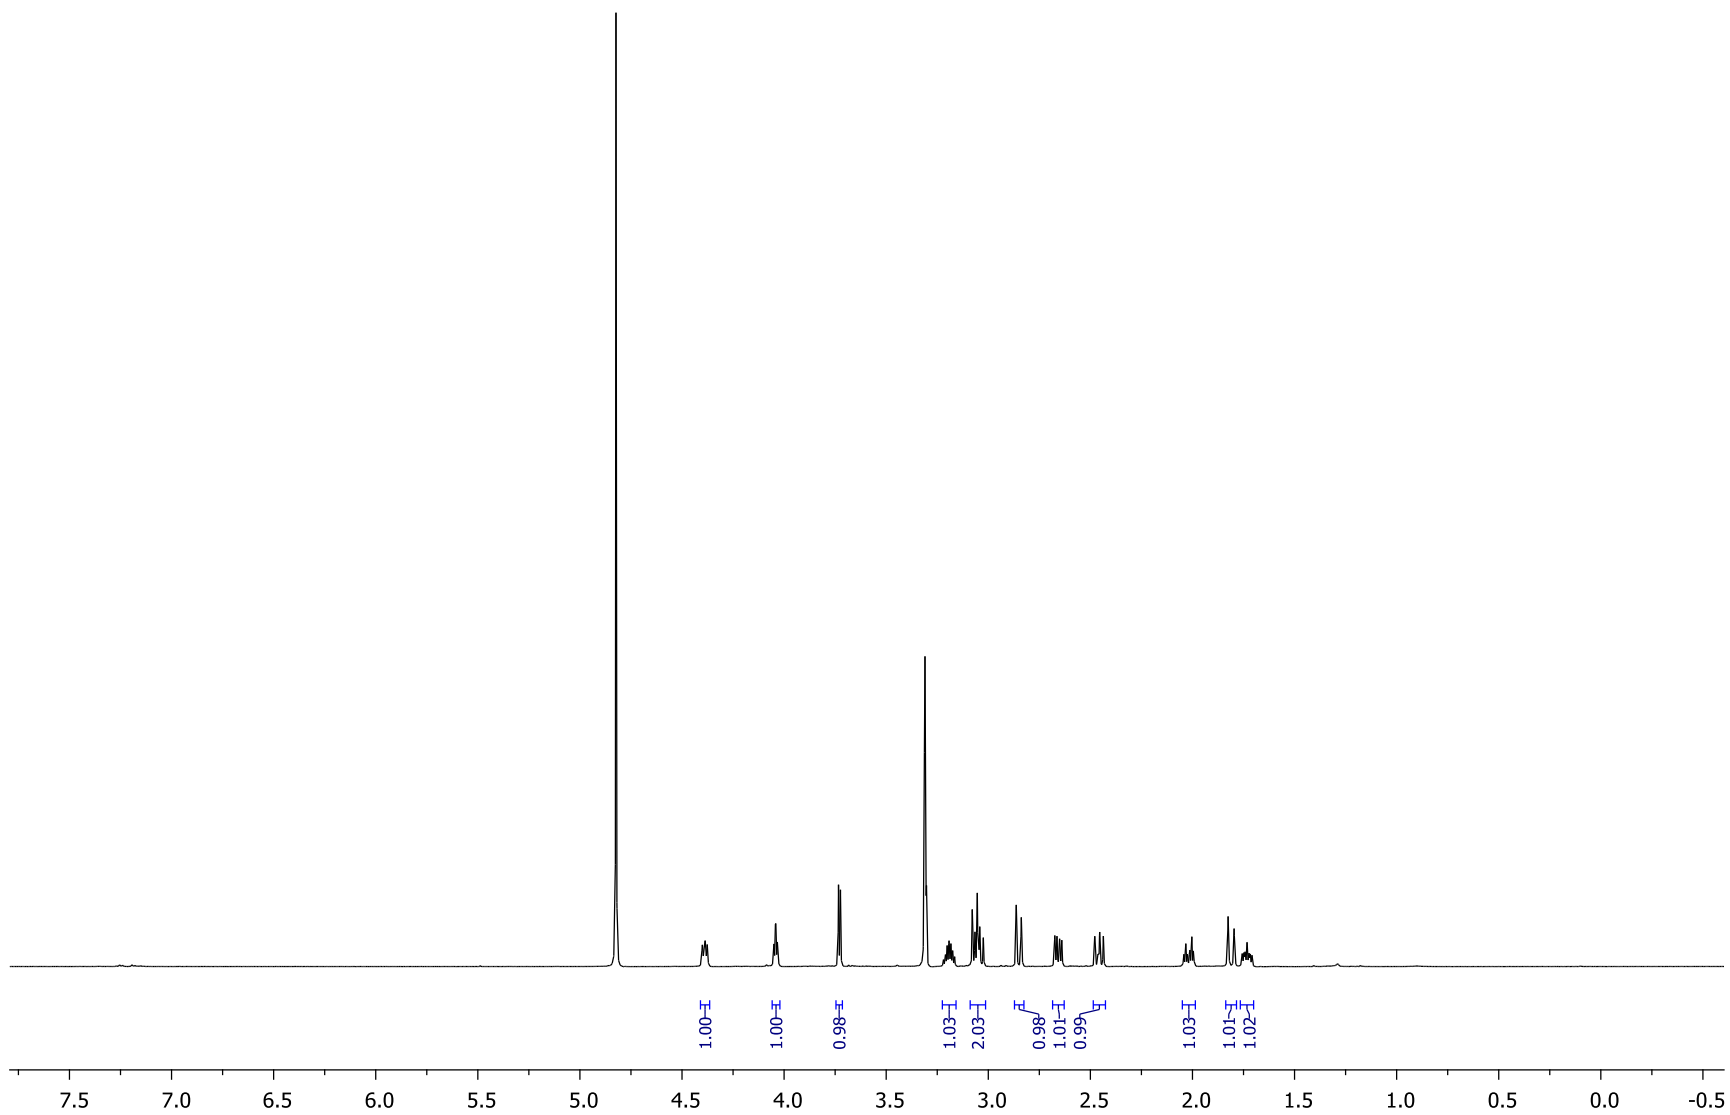

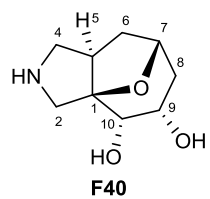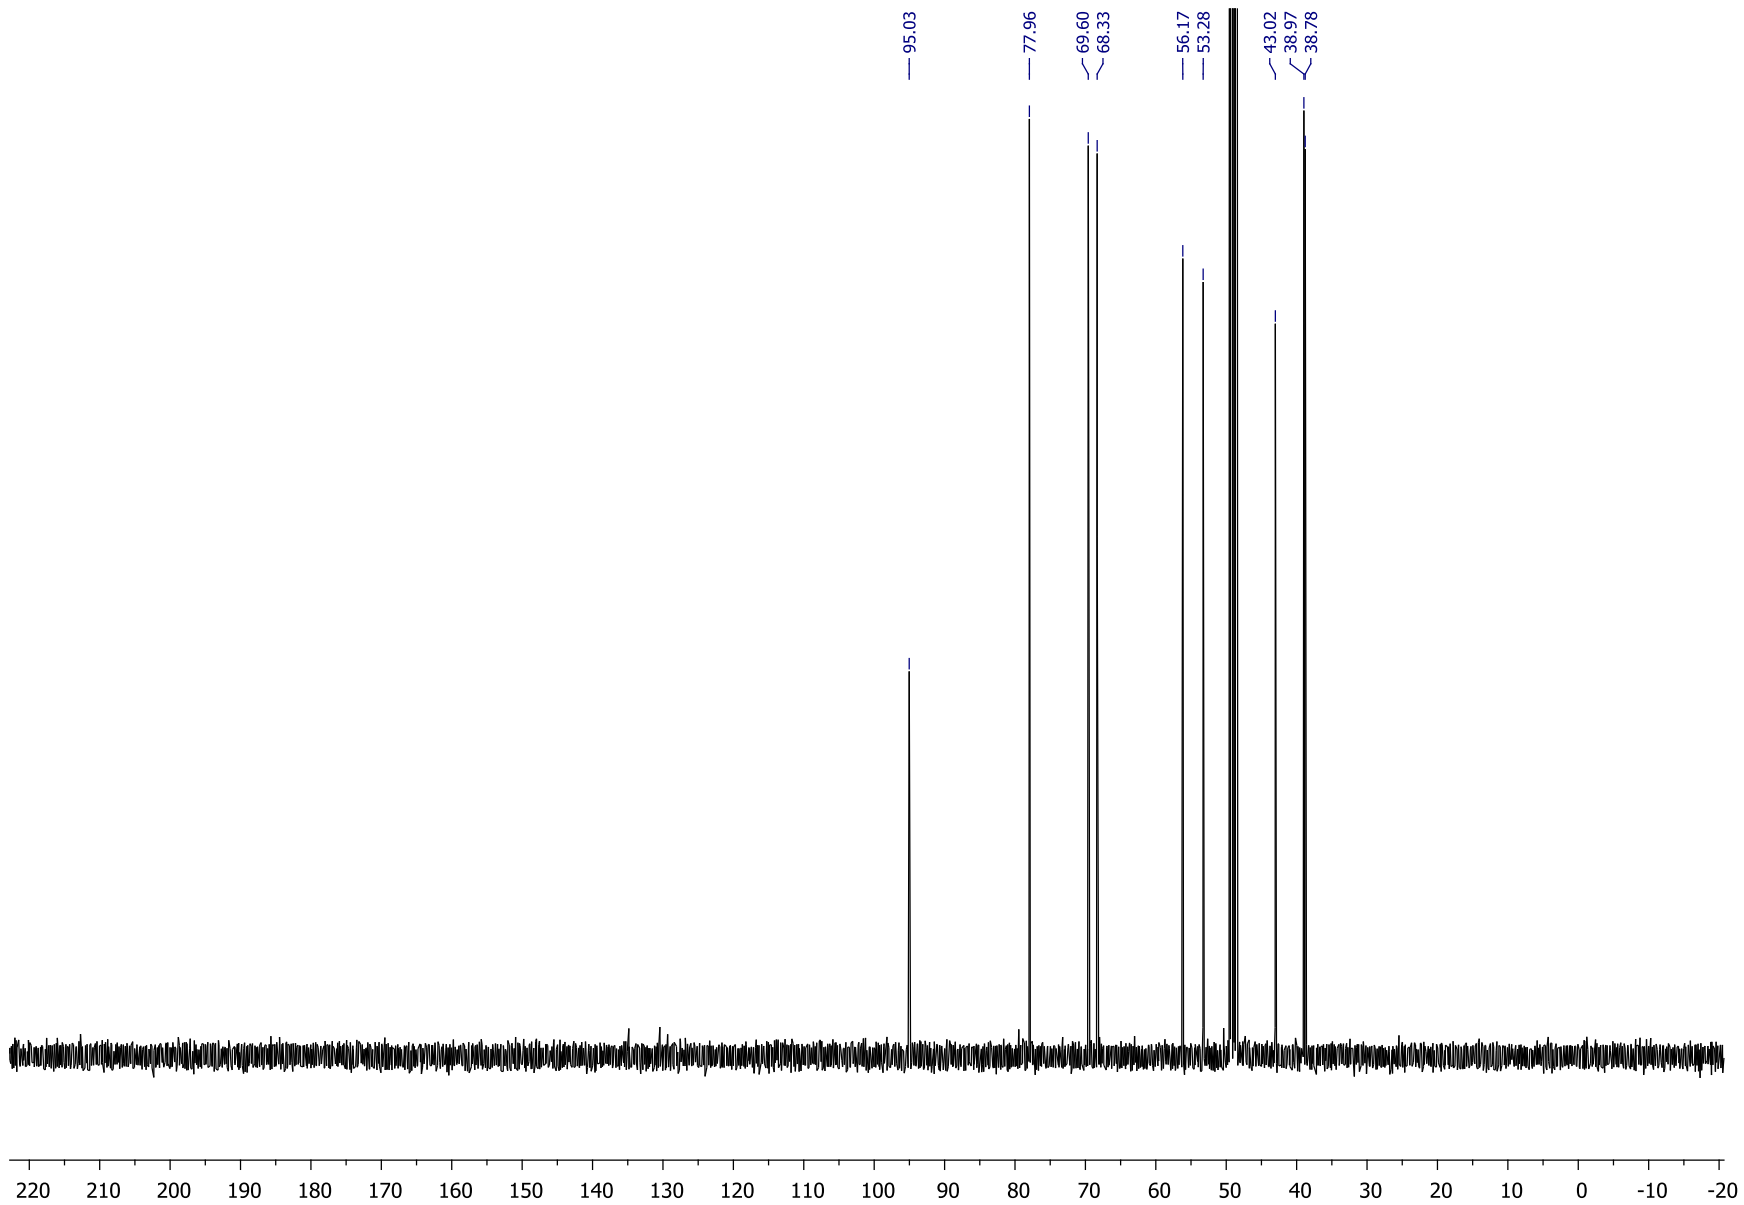

400

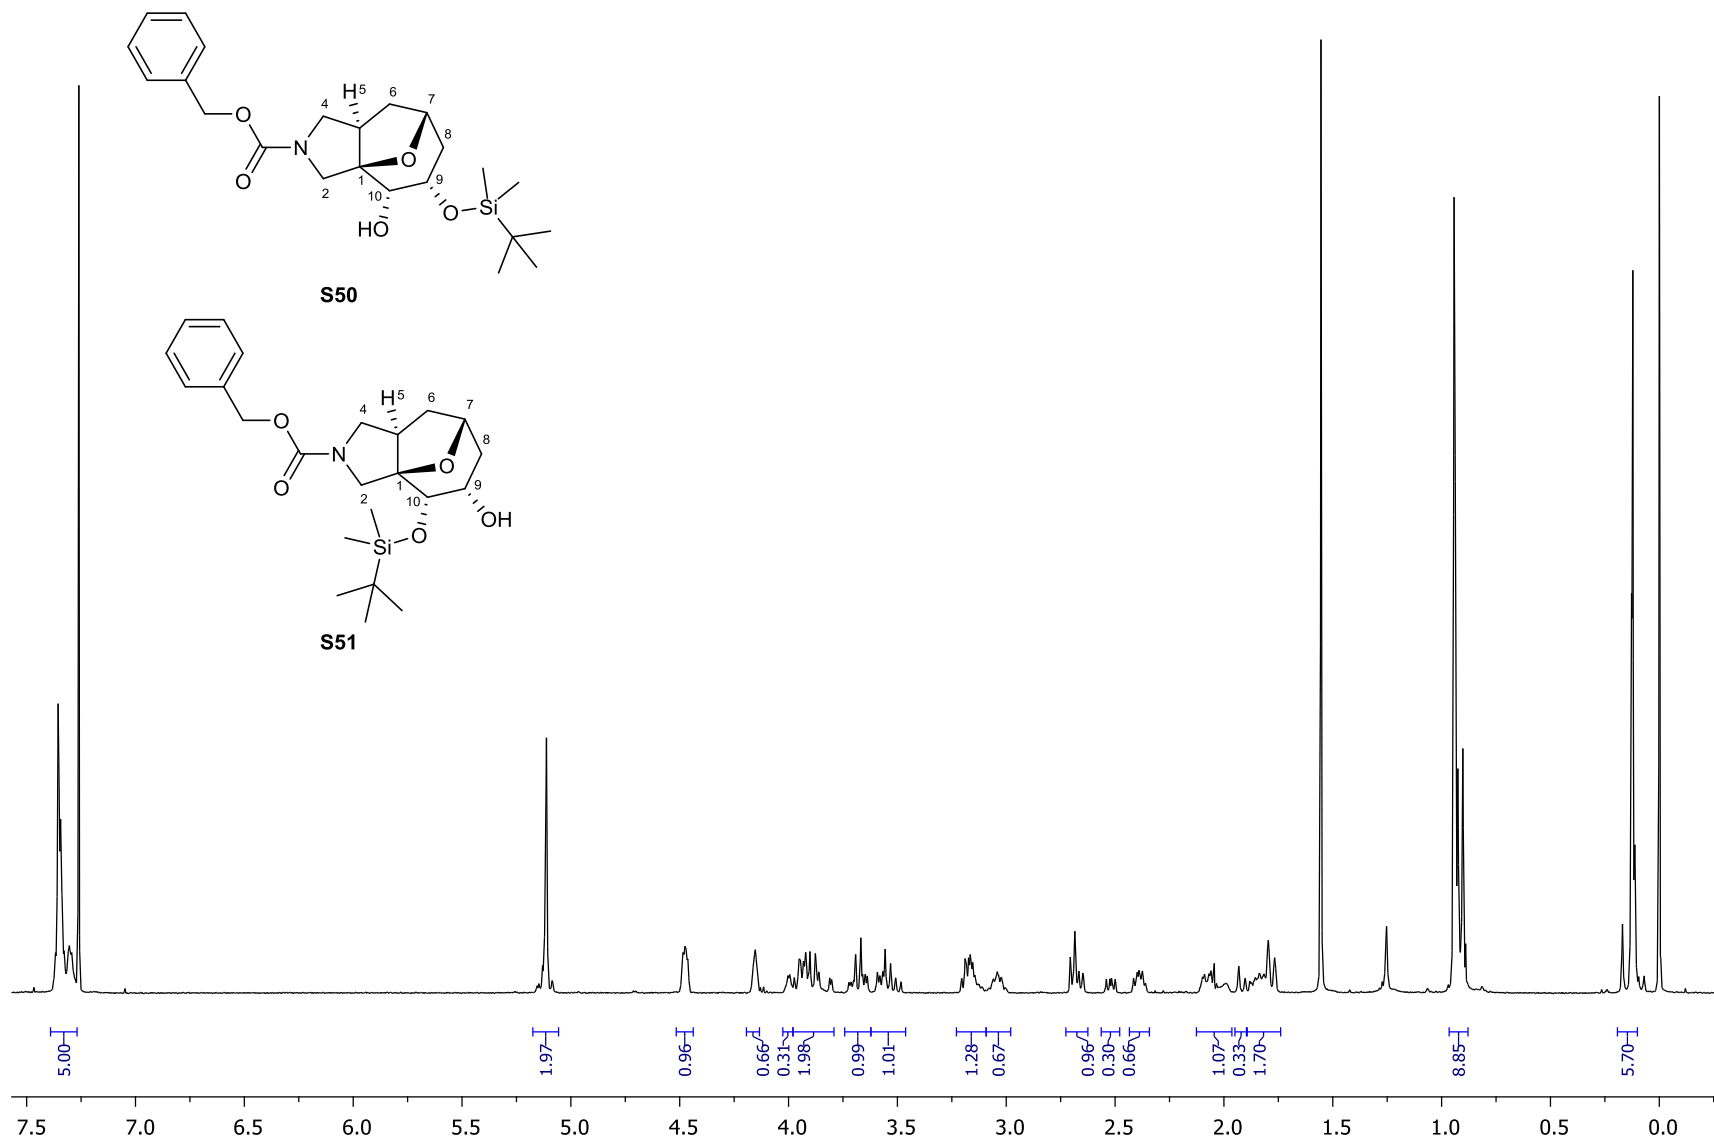

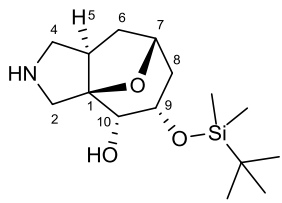

S52

+

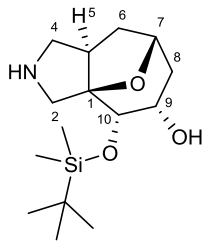

S53

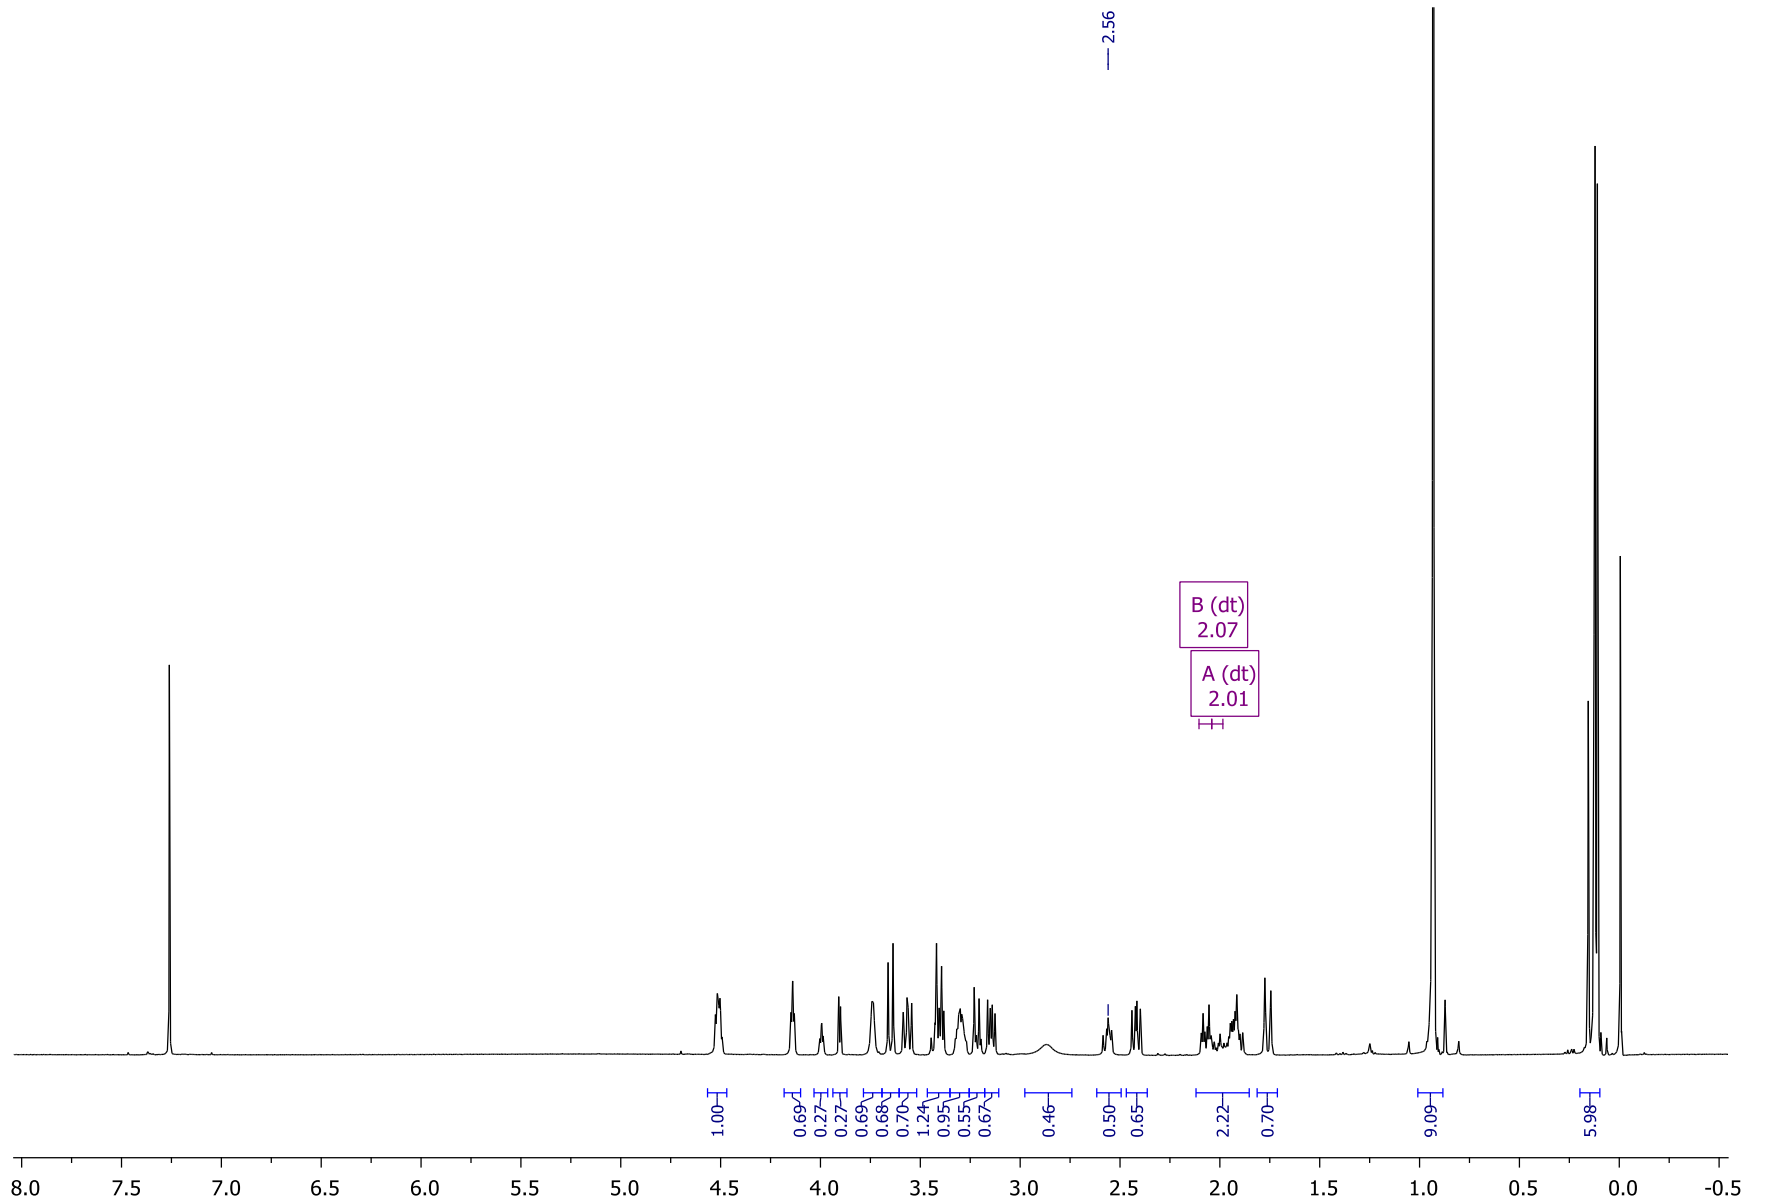

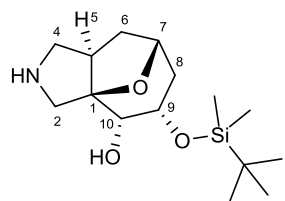

**S52**

+

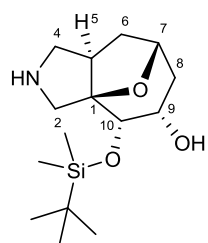

**S53**

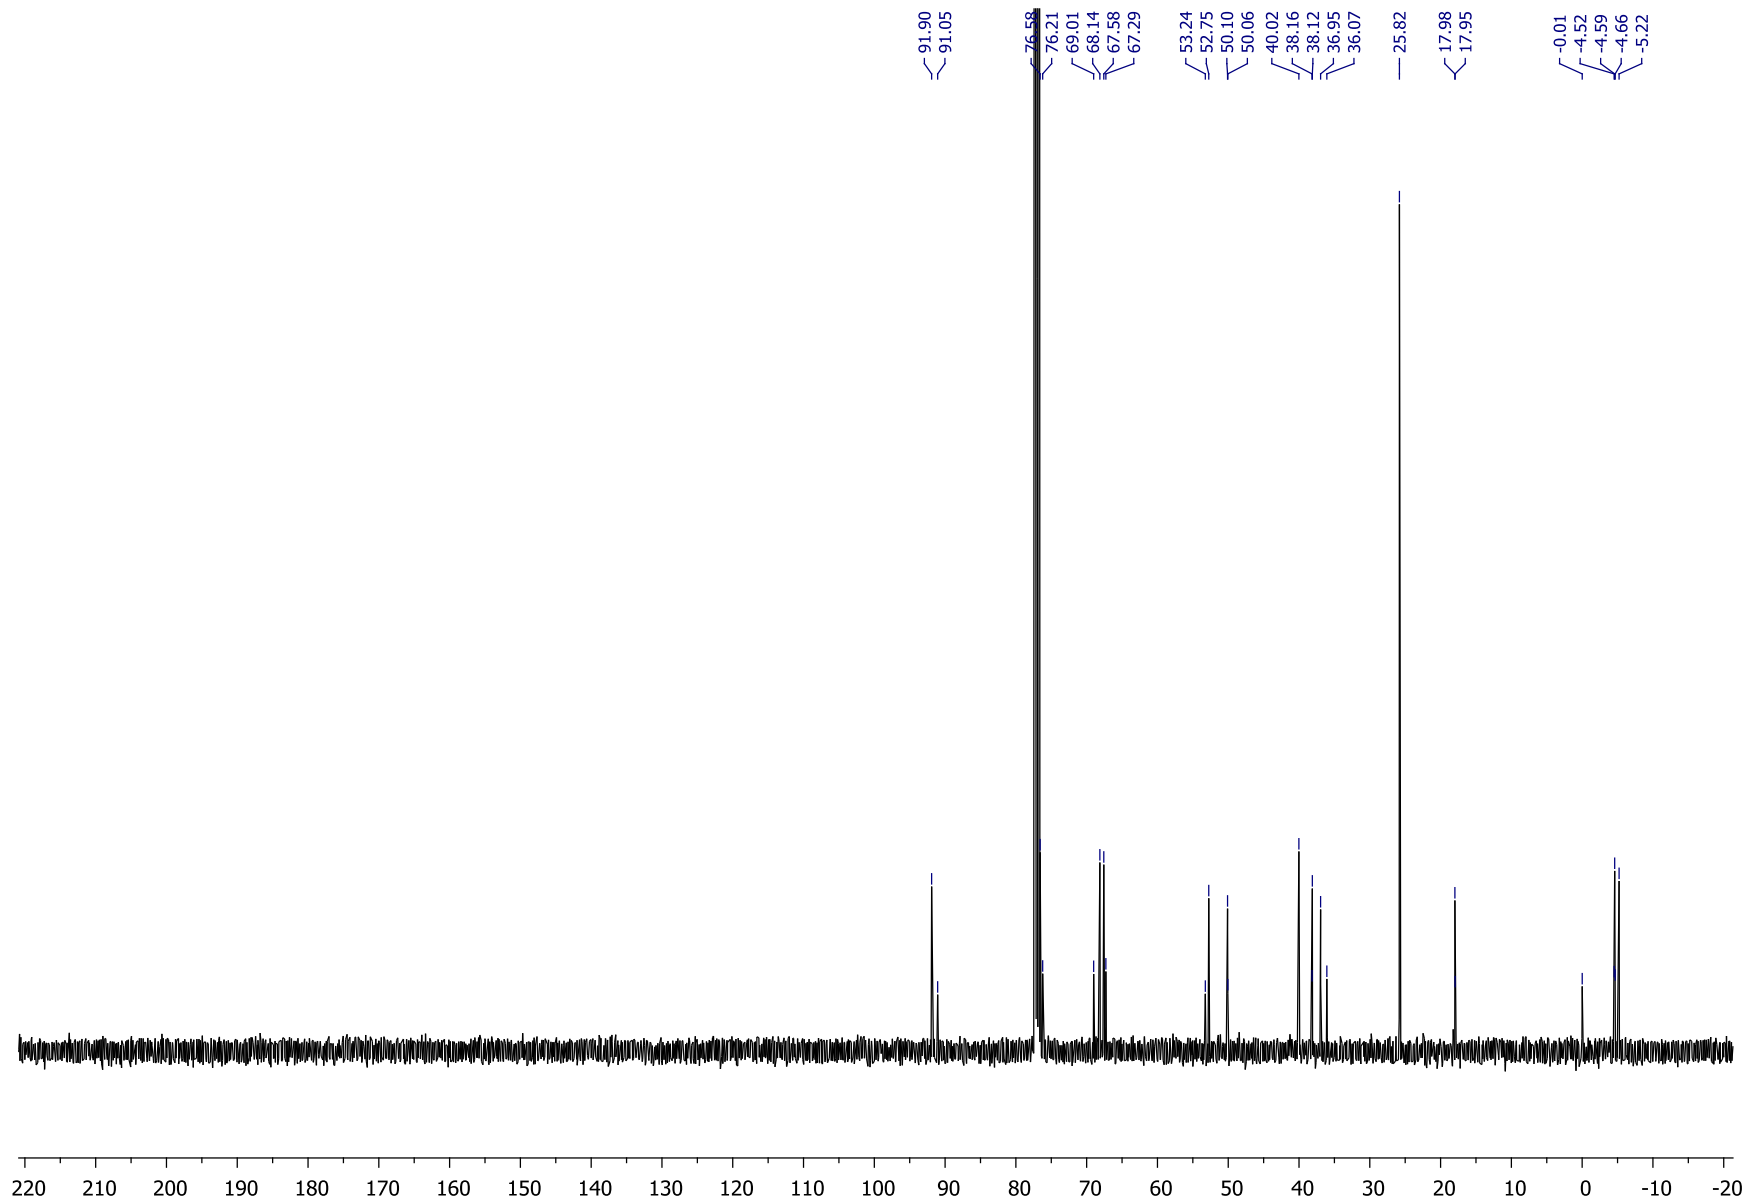



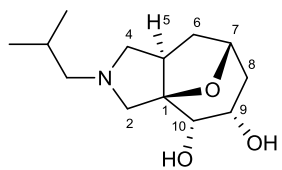

F41

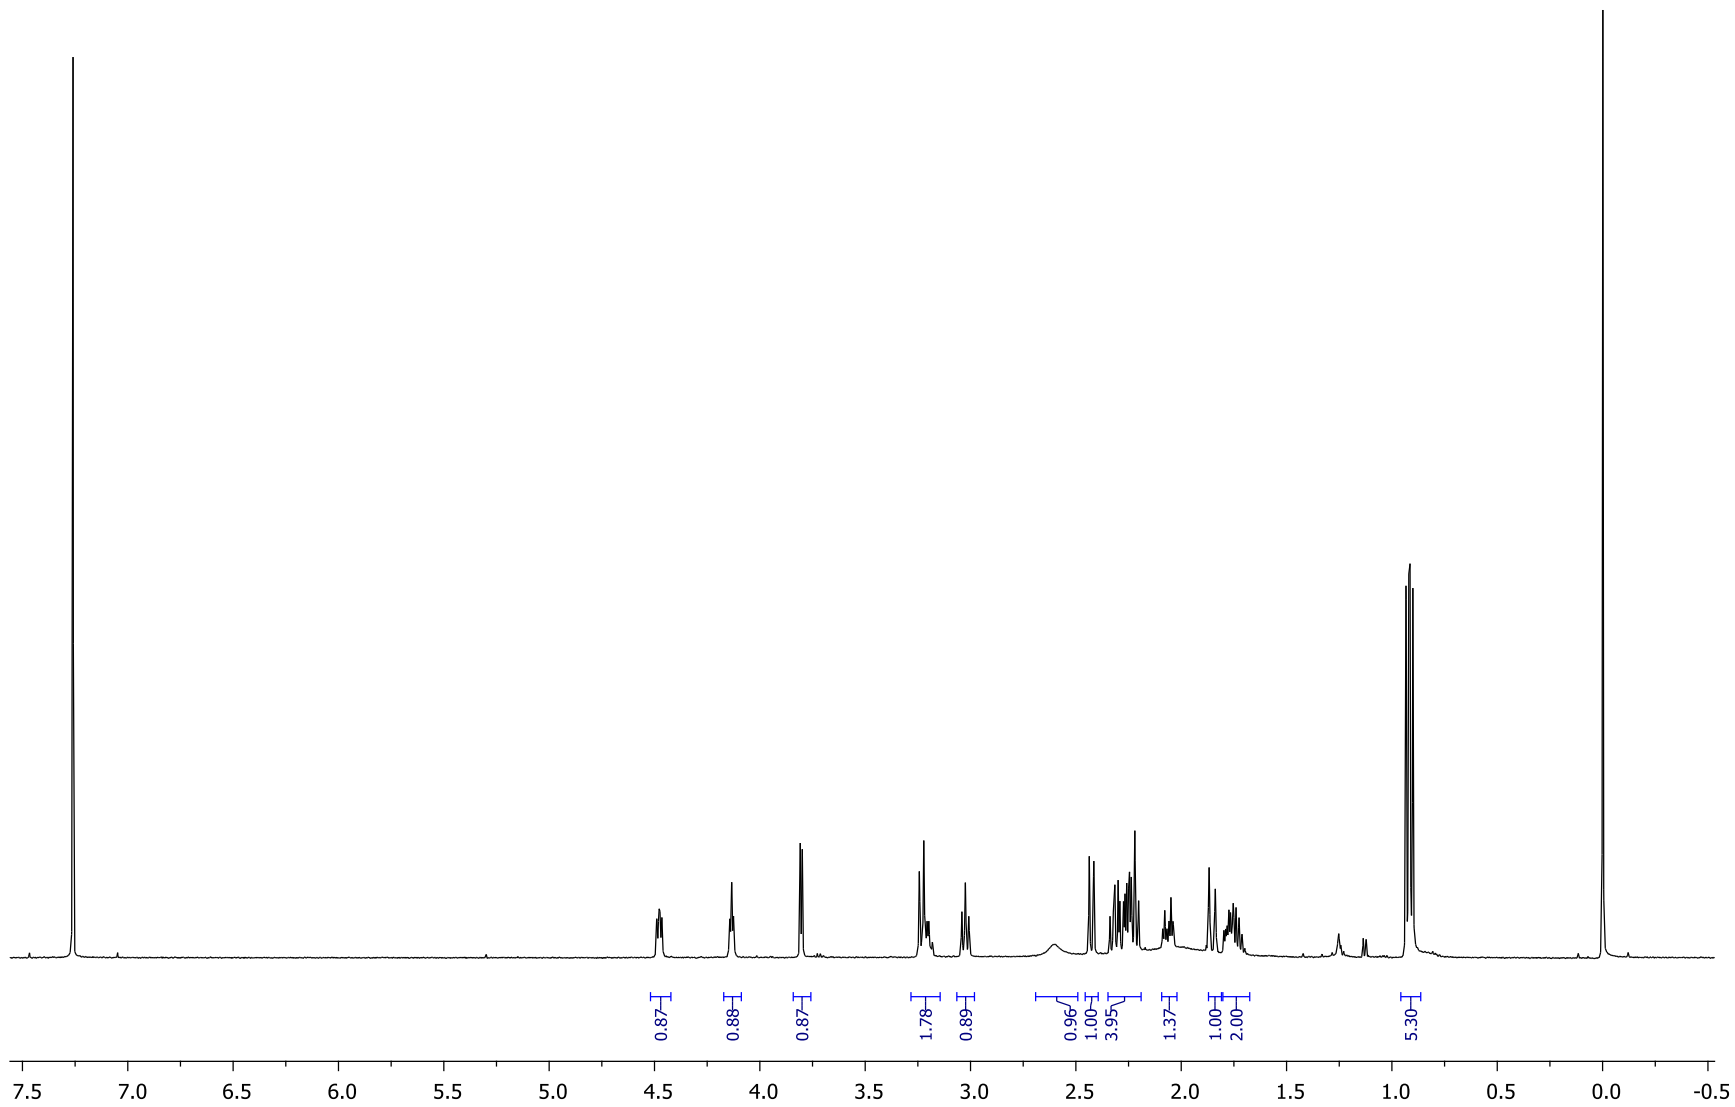

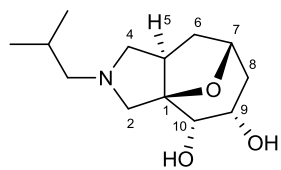

F41

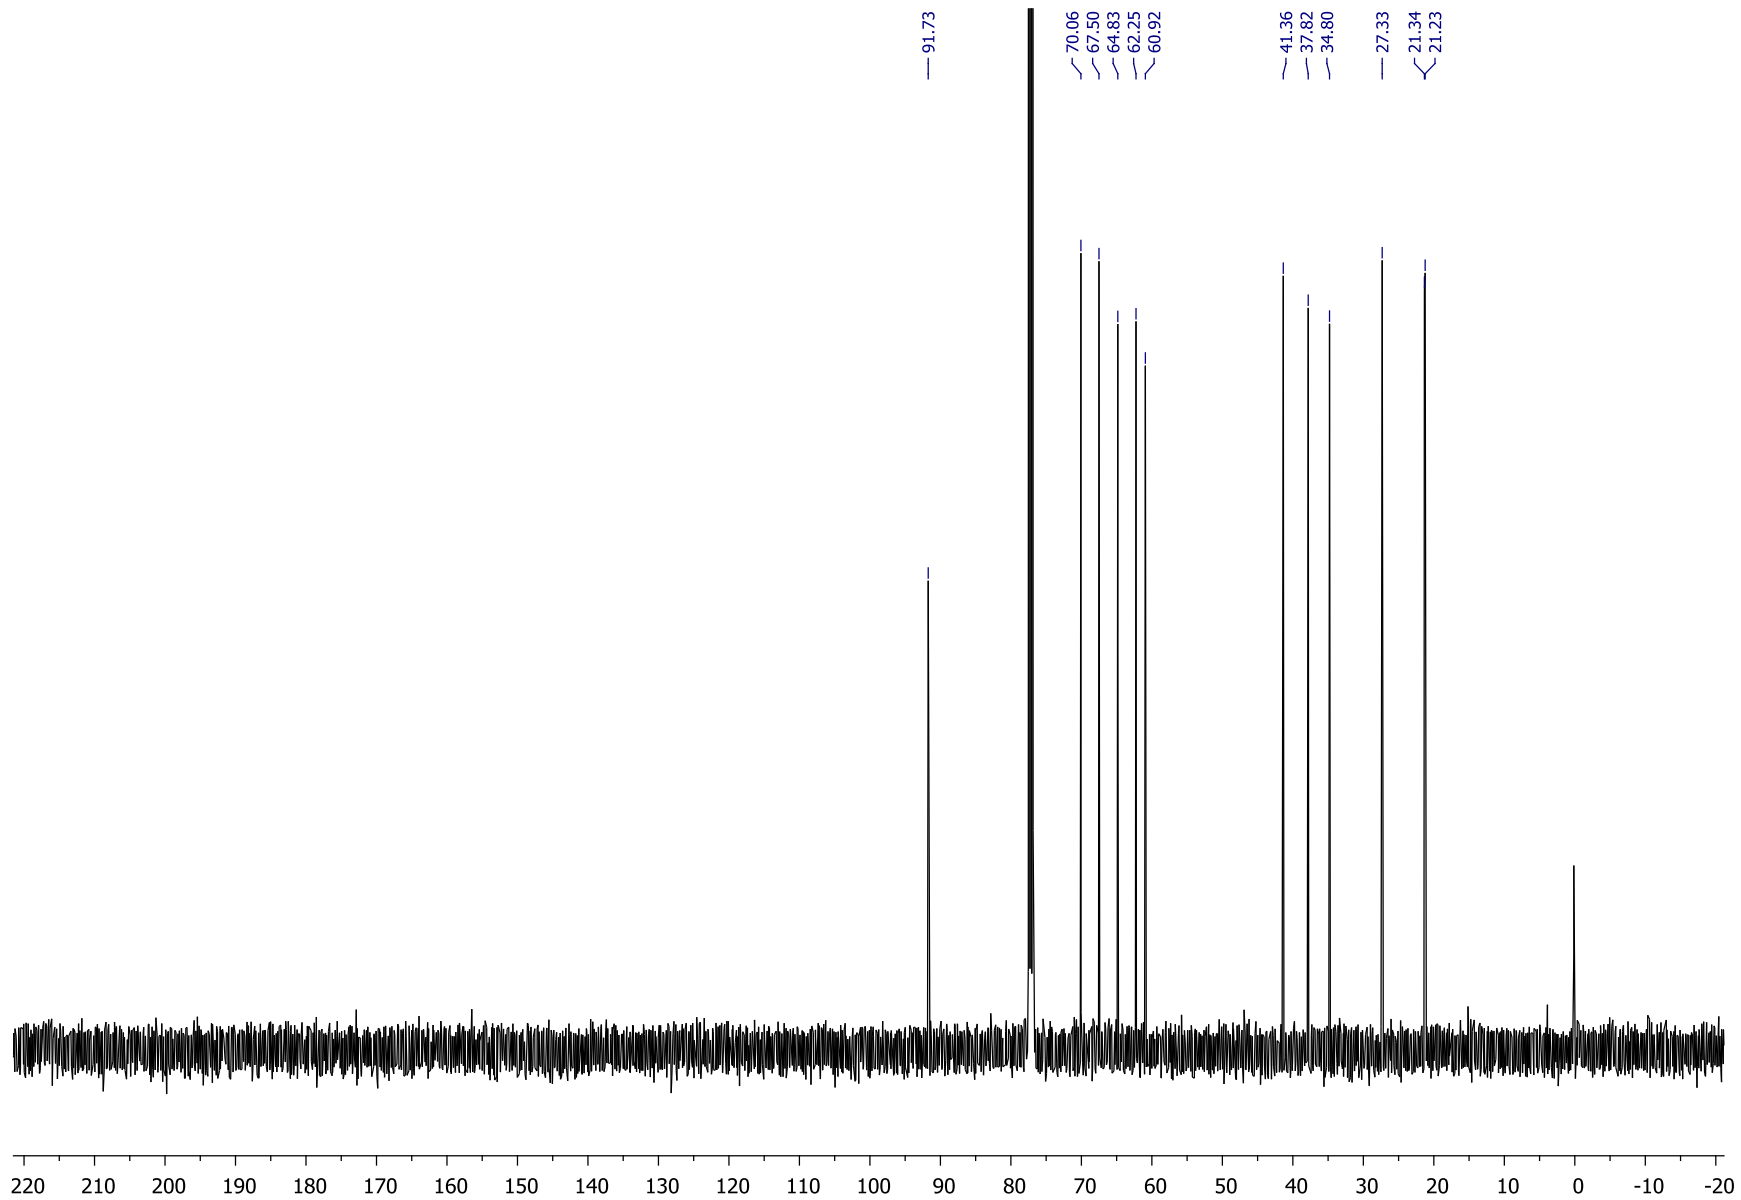

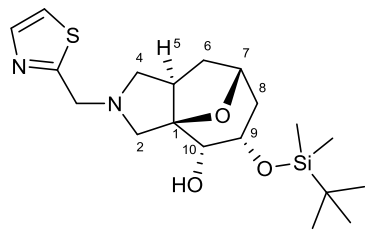

S54

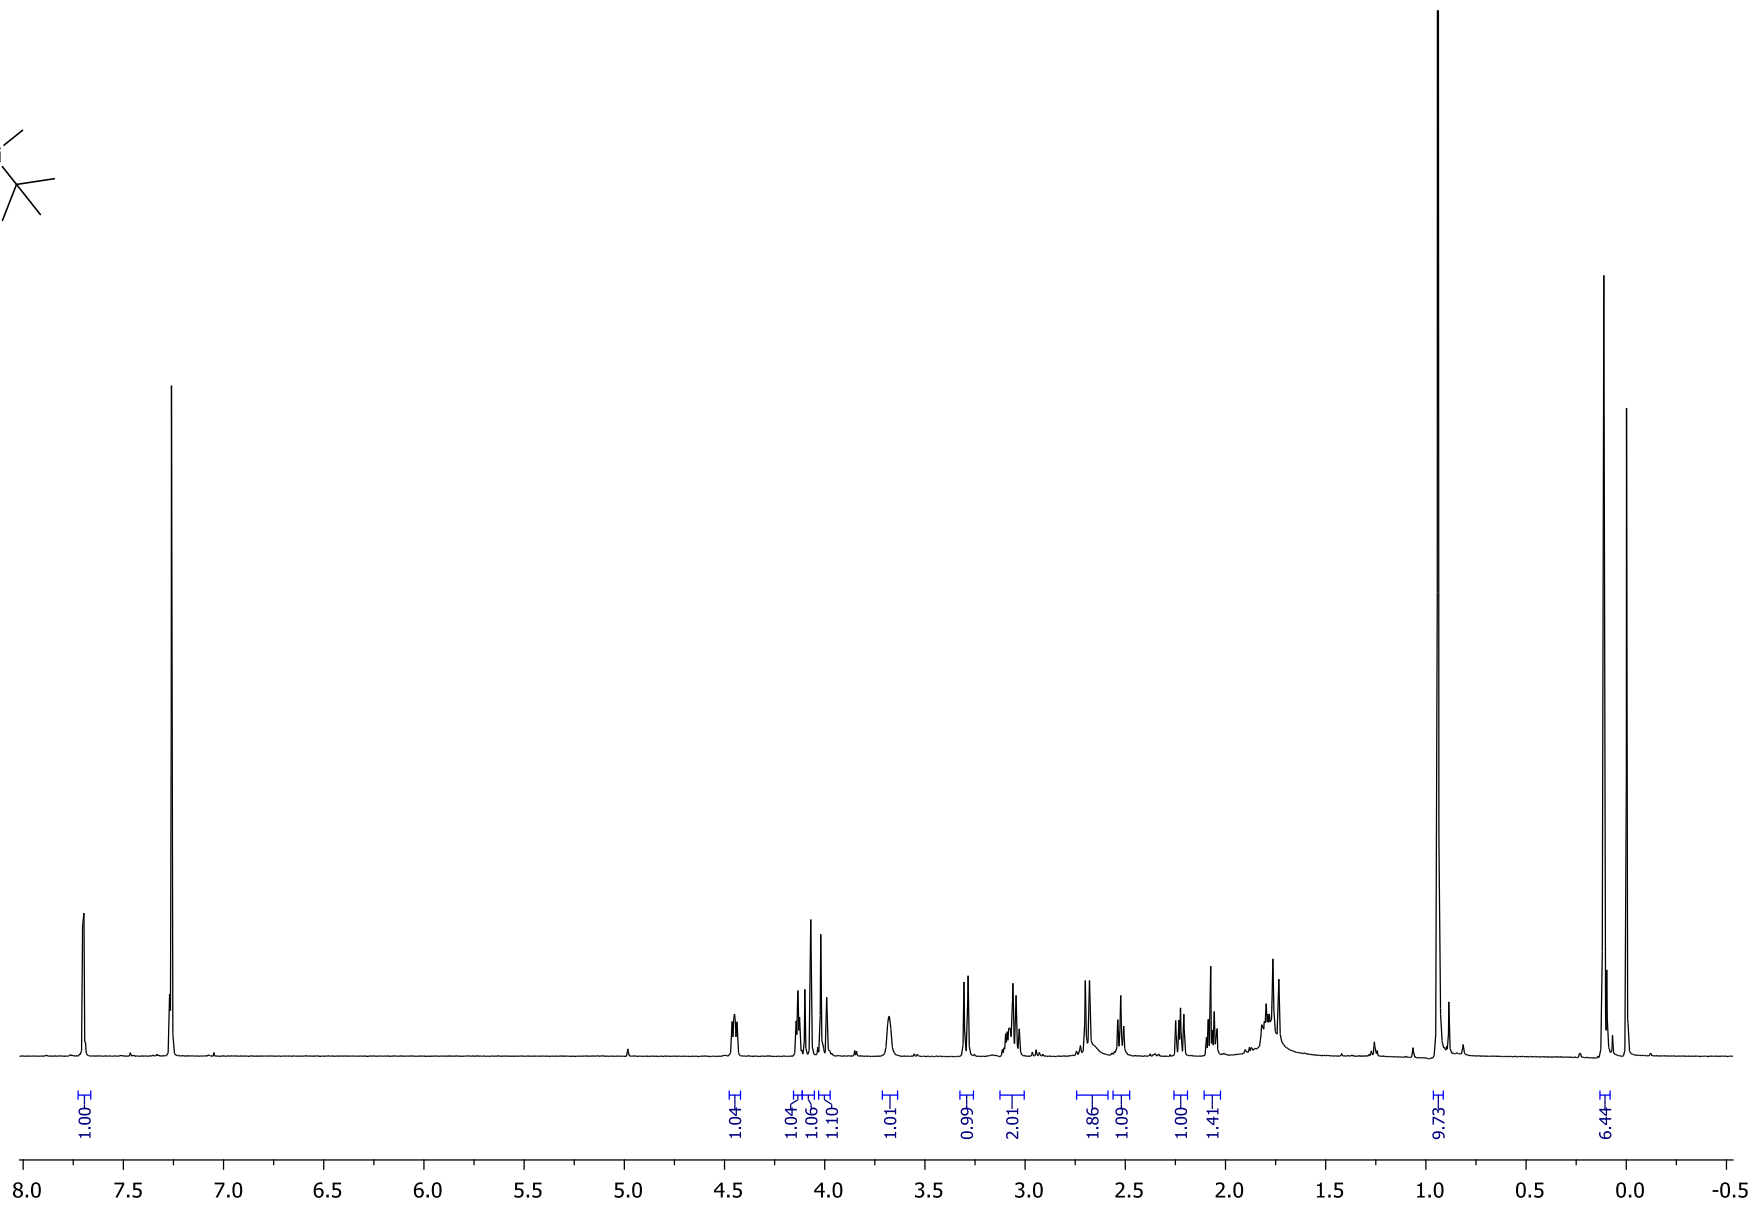

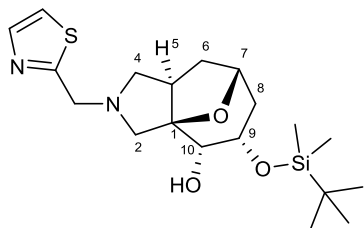

S54

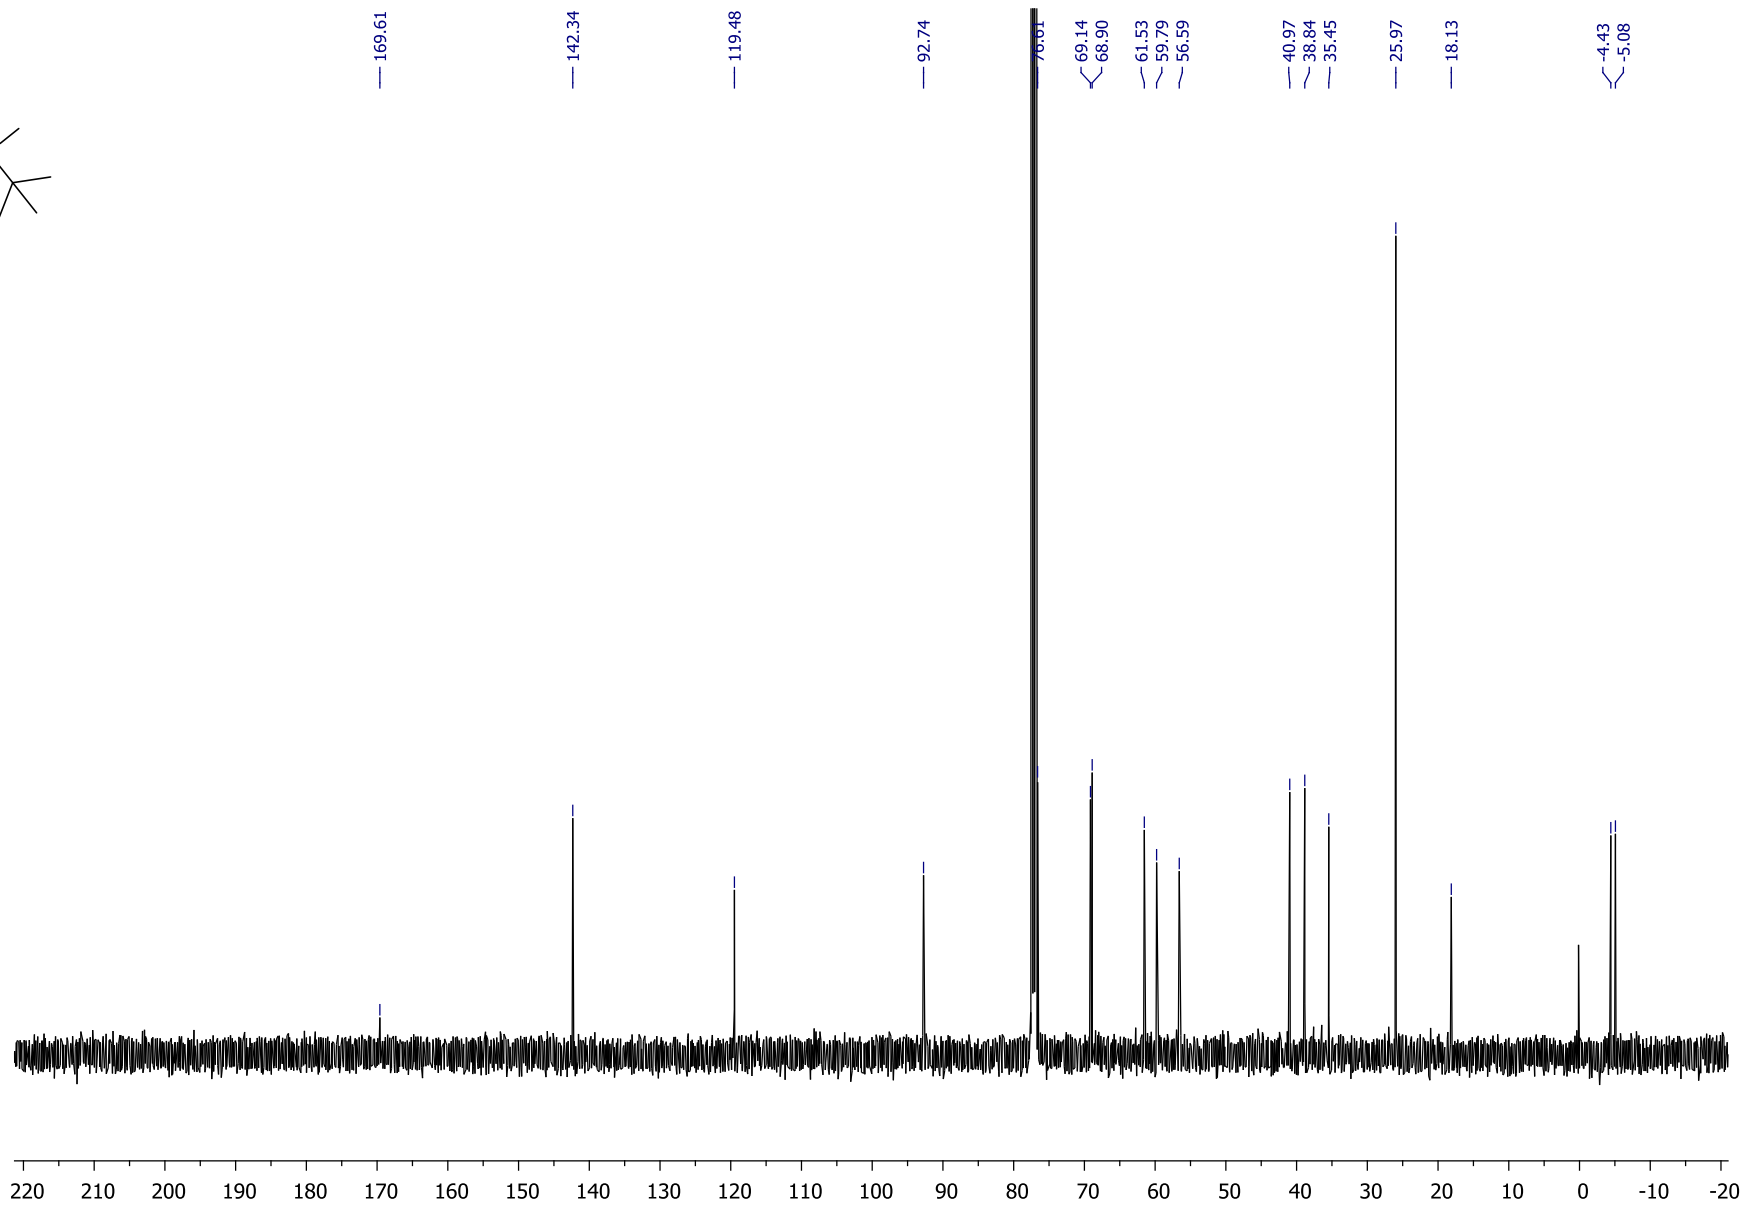

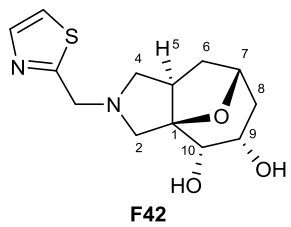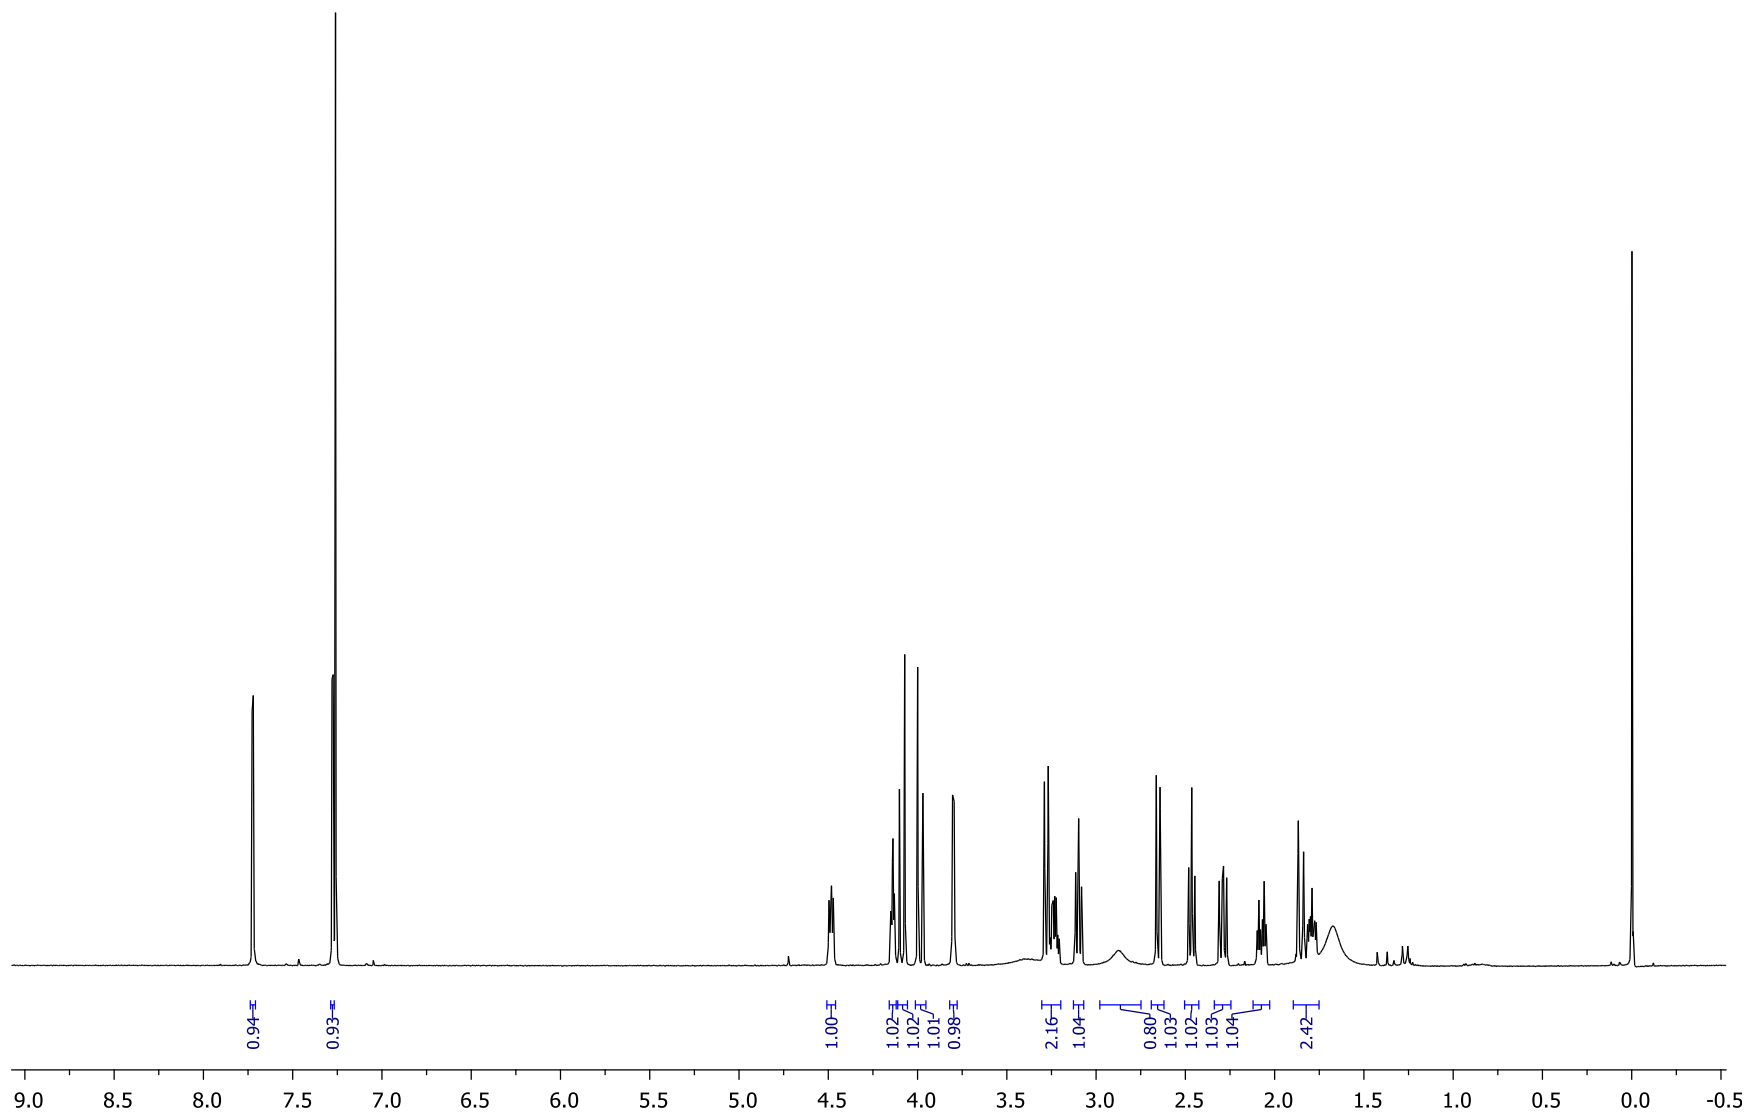

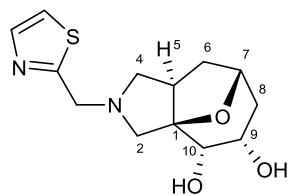

F42

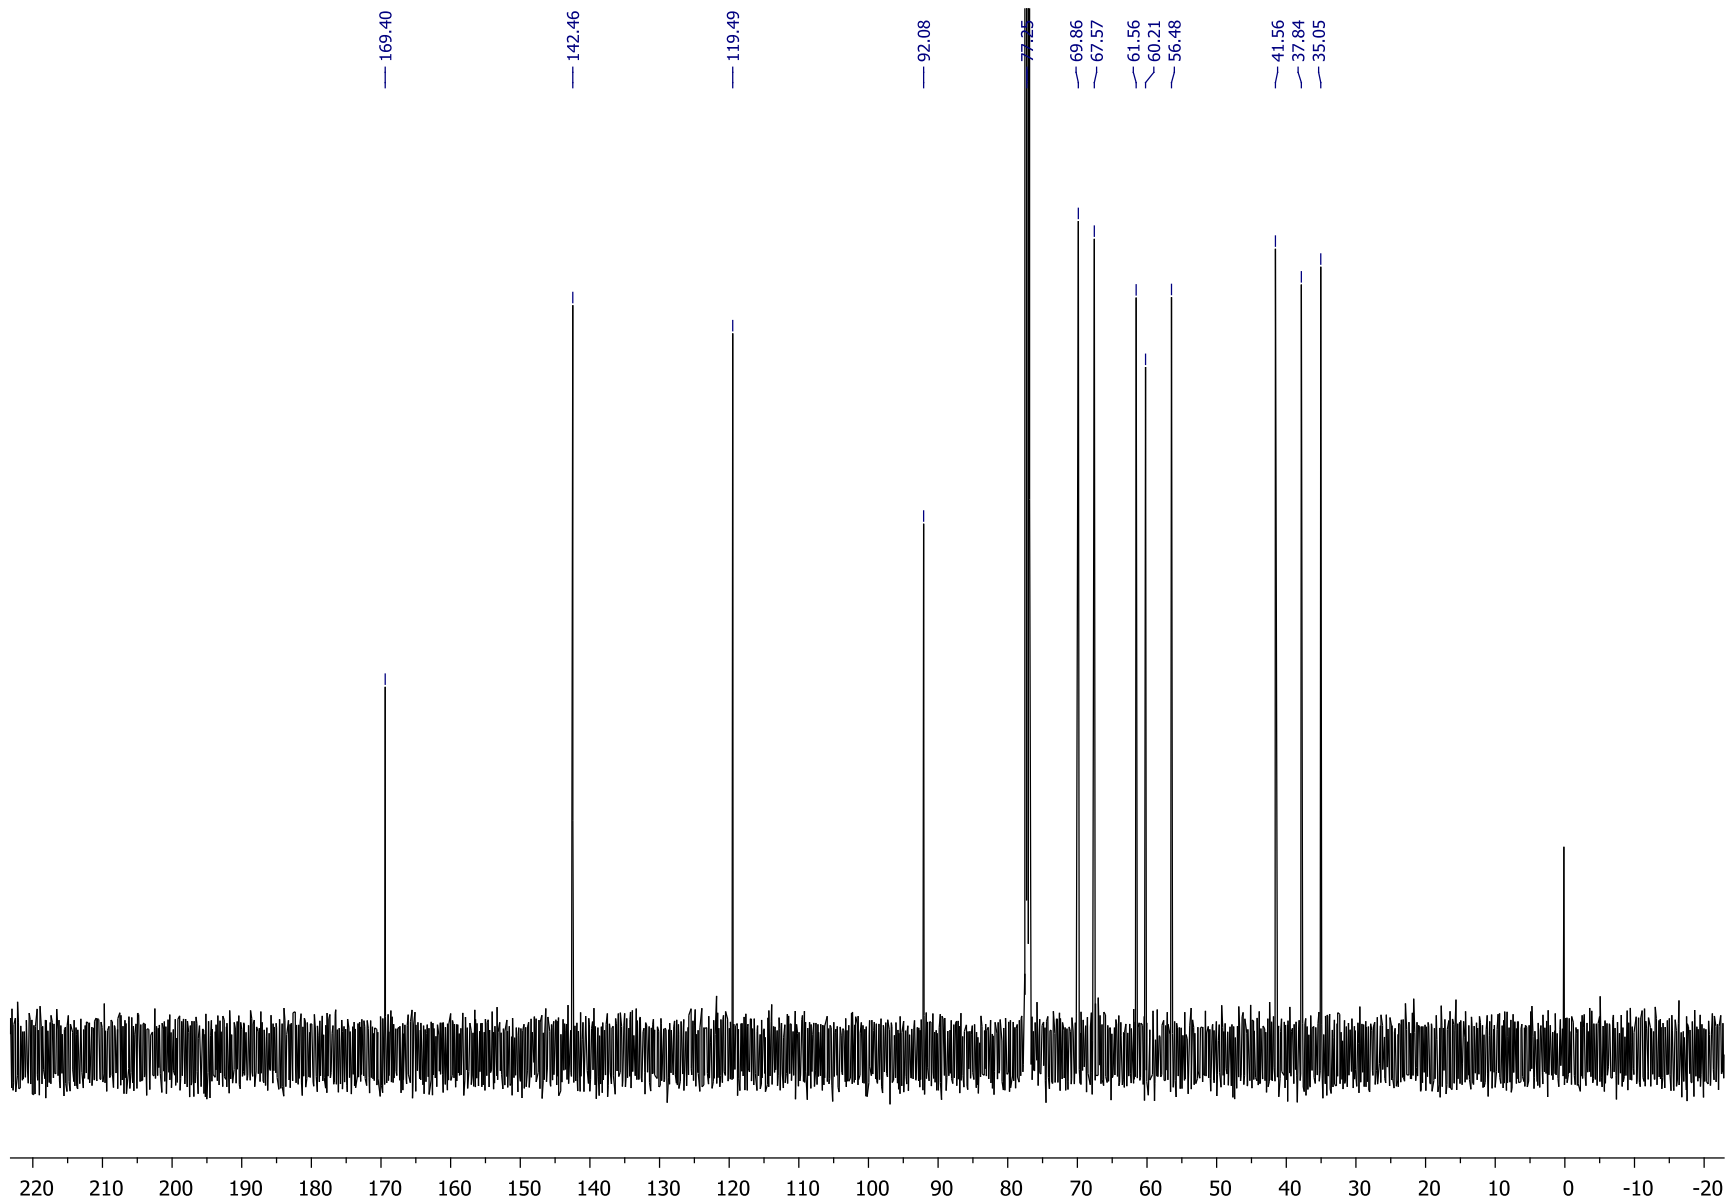

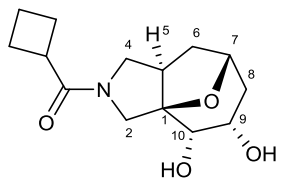

F43

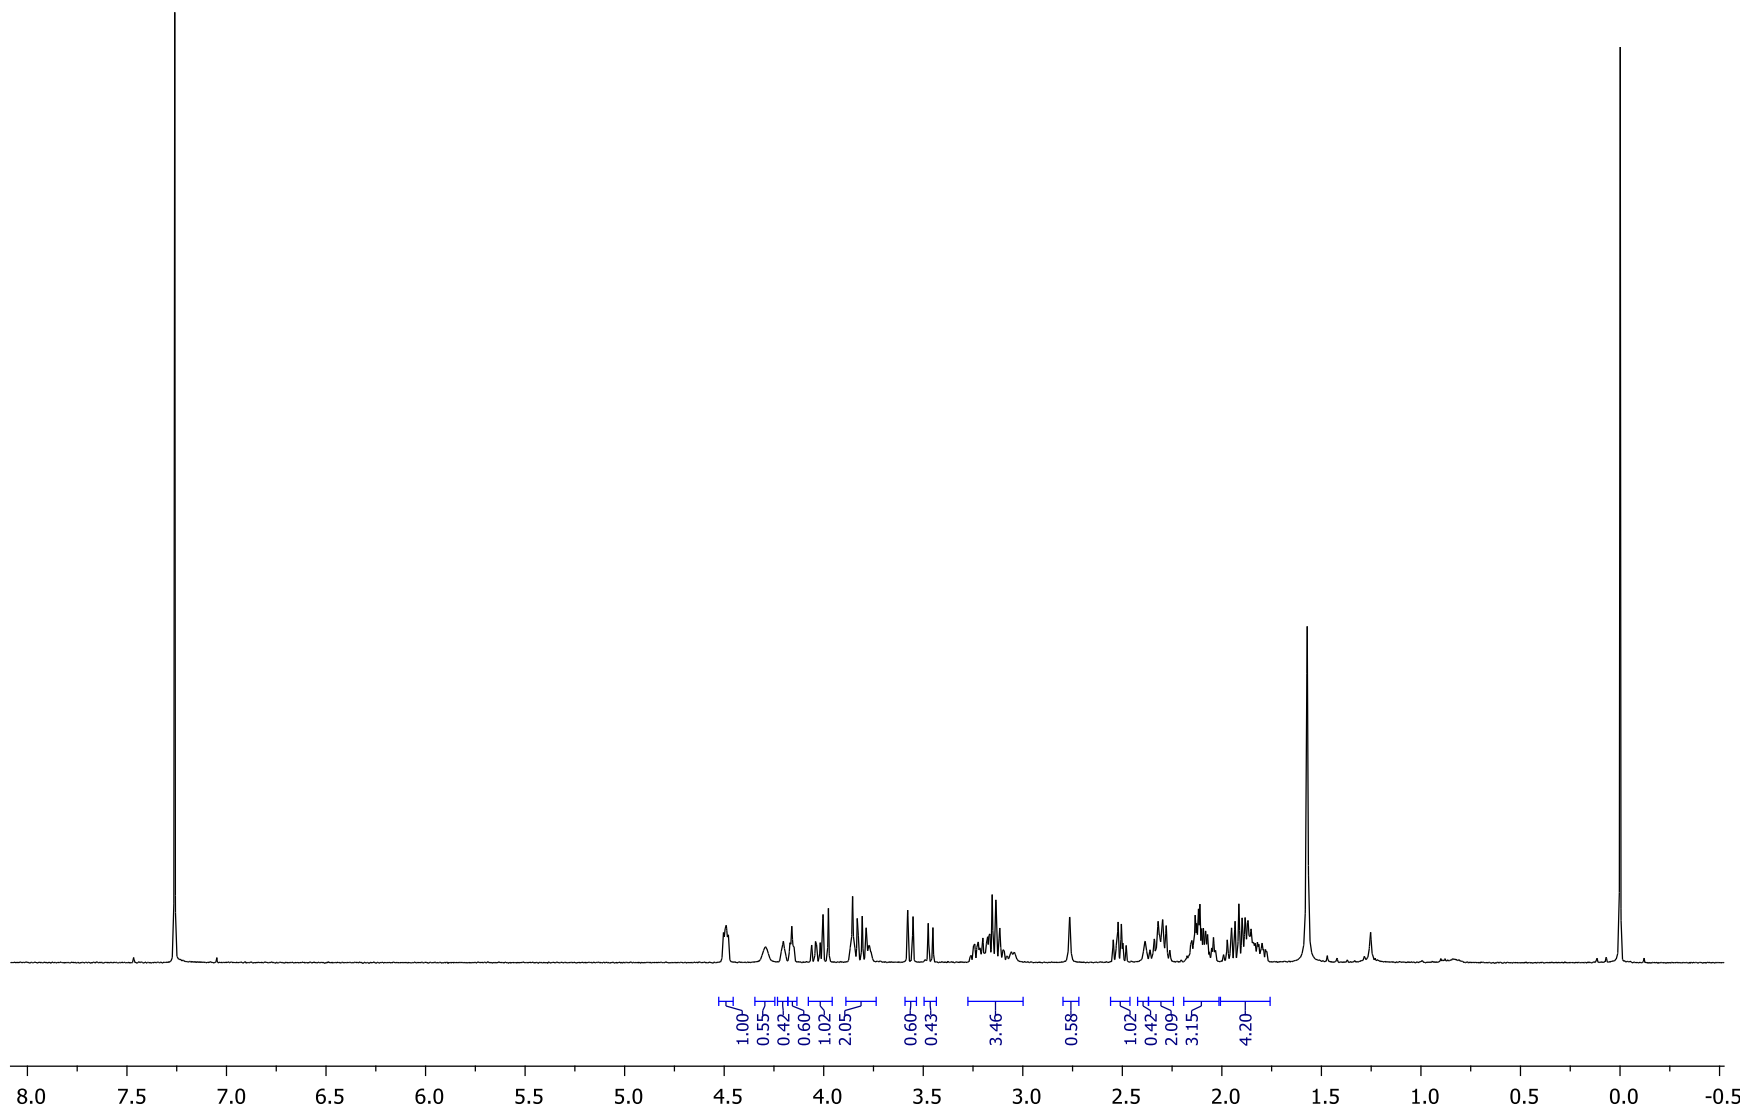

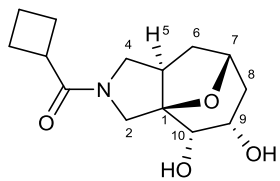

F43

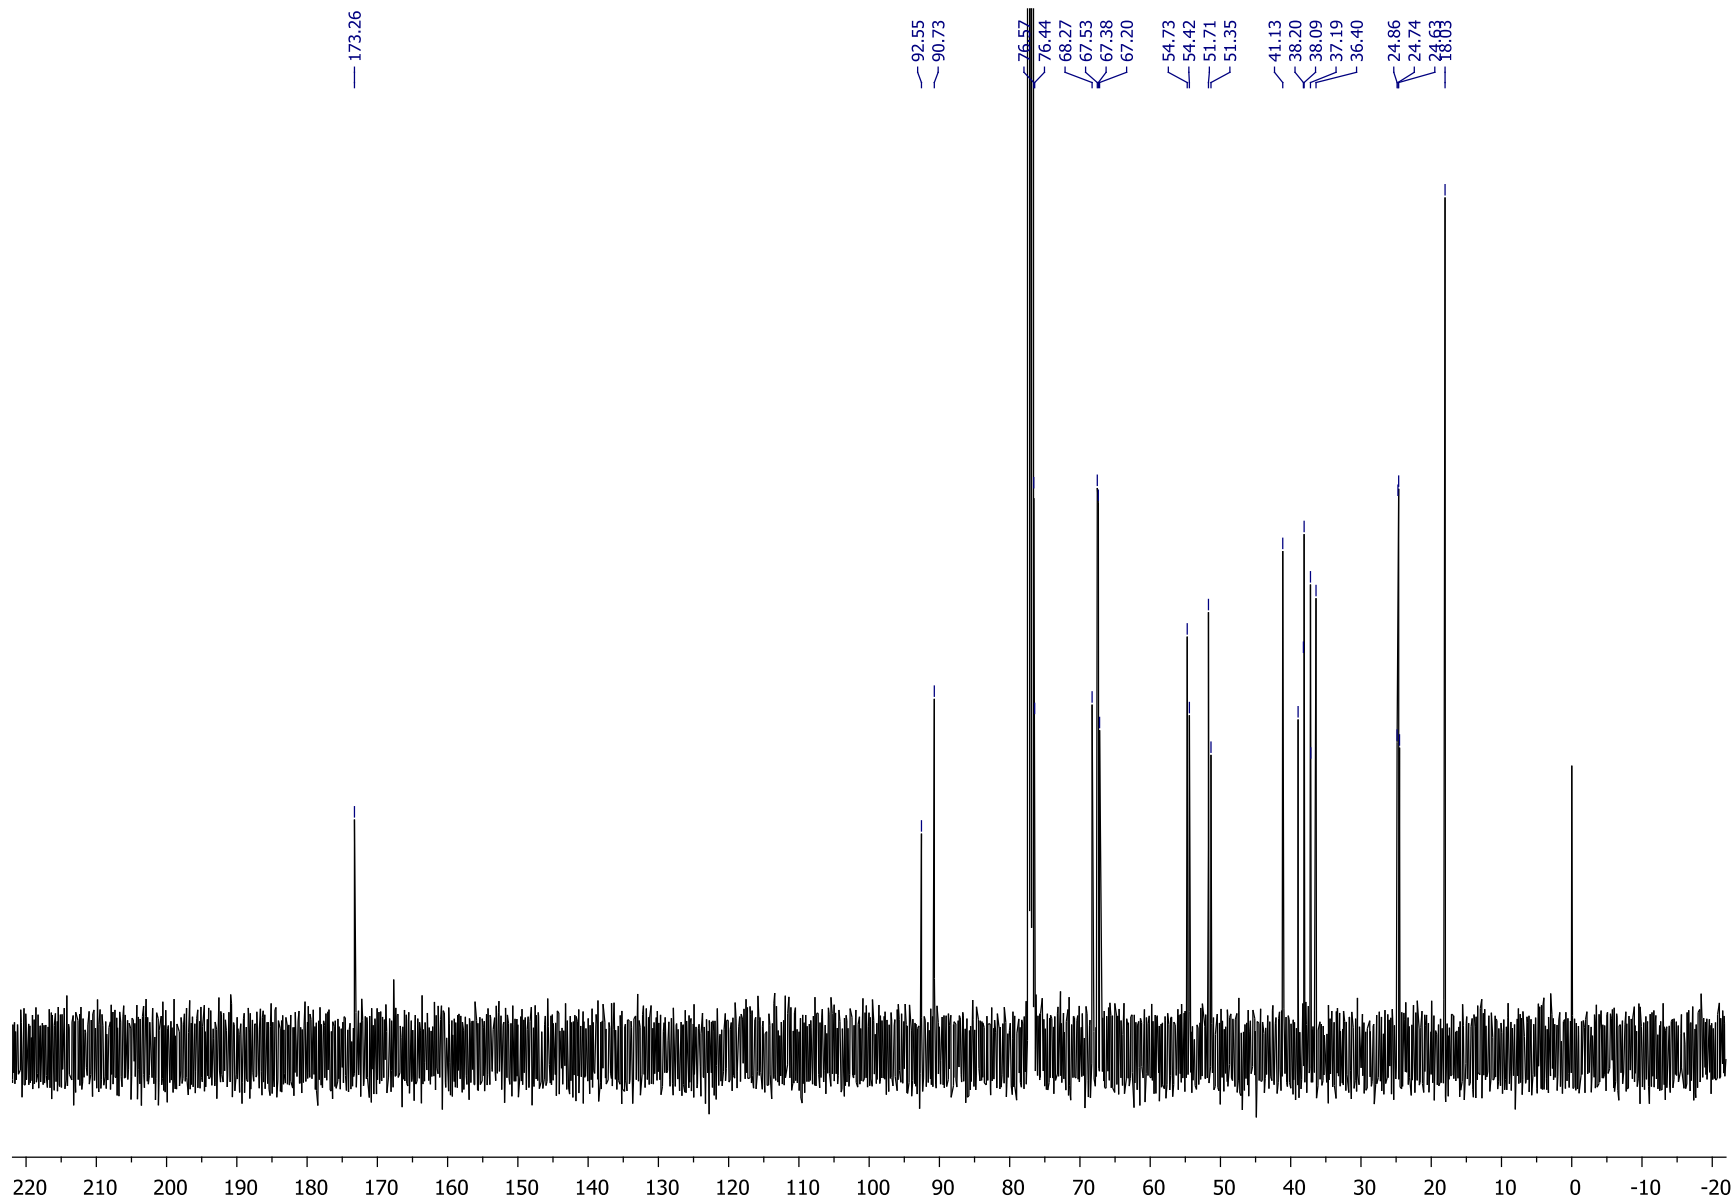



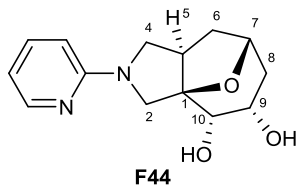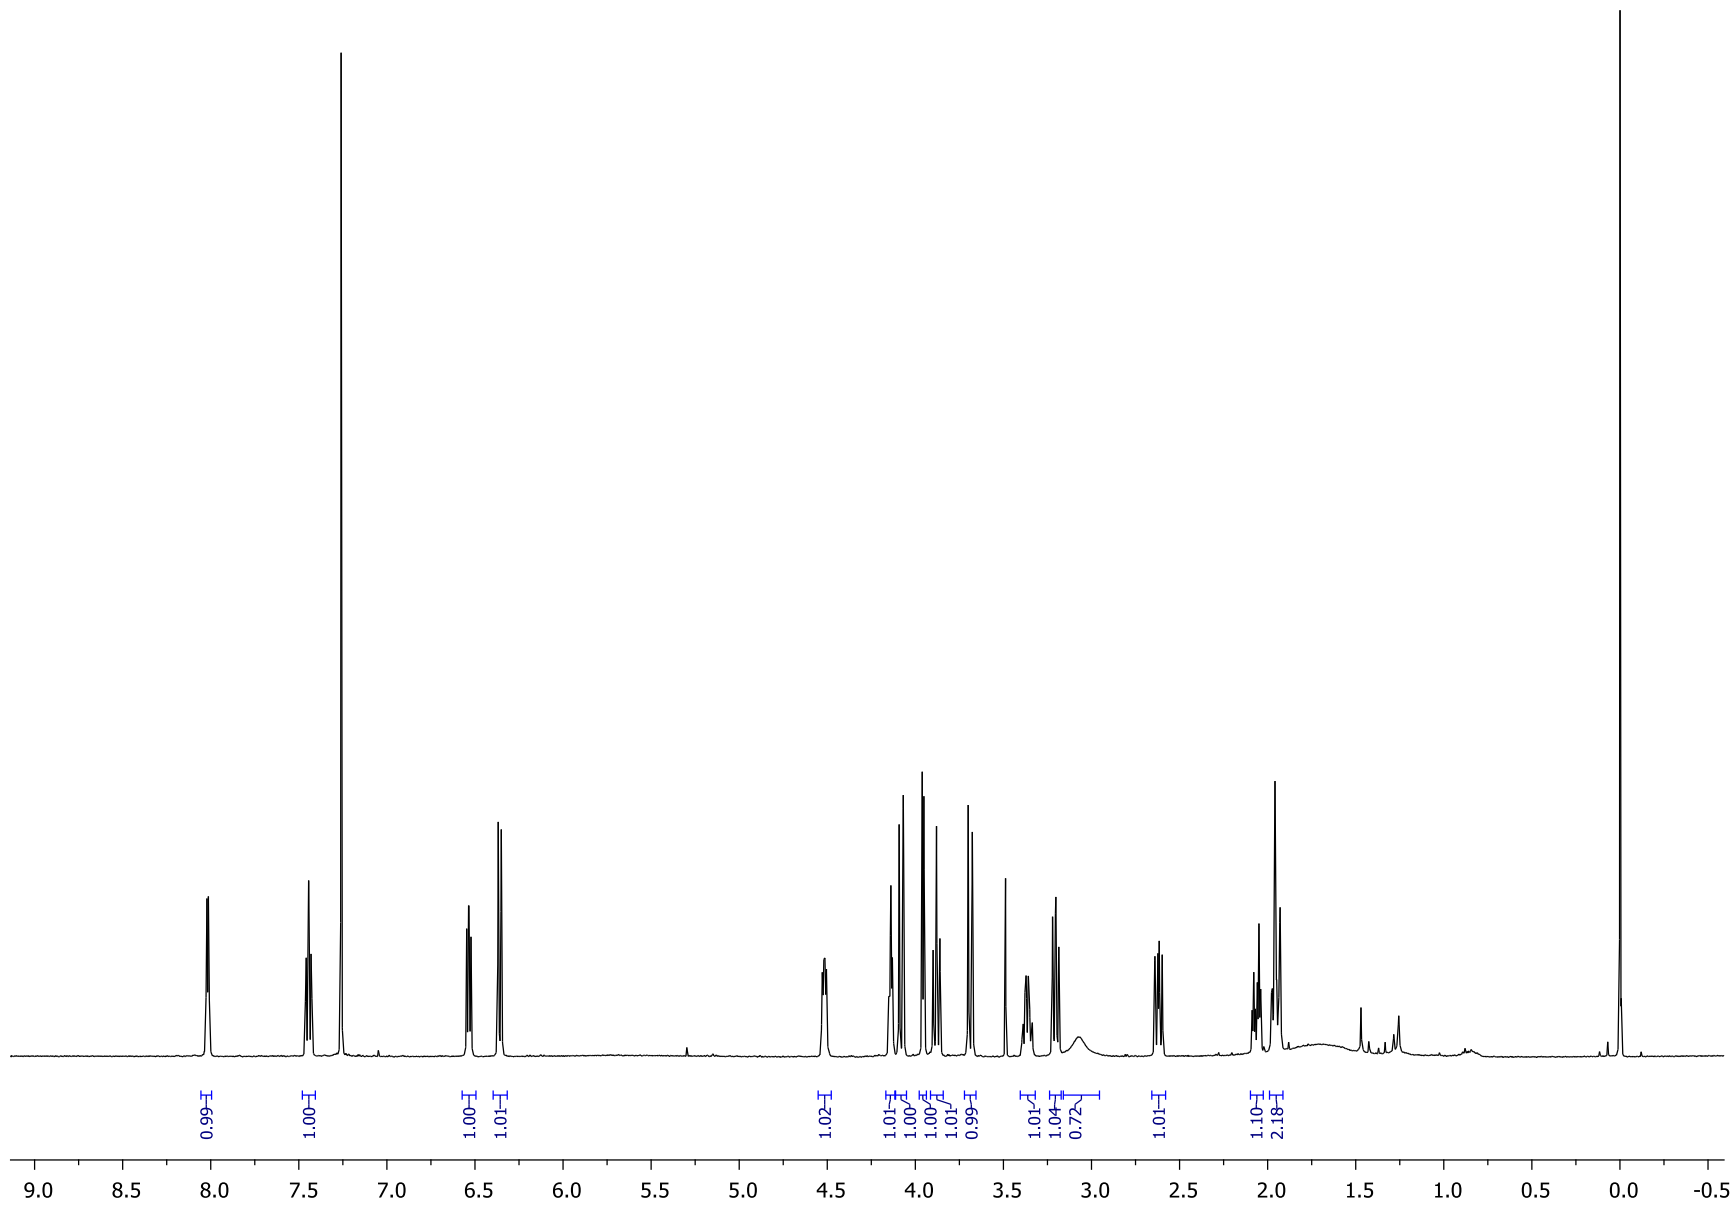

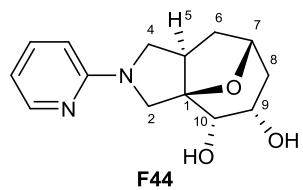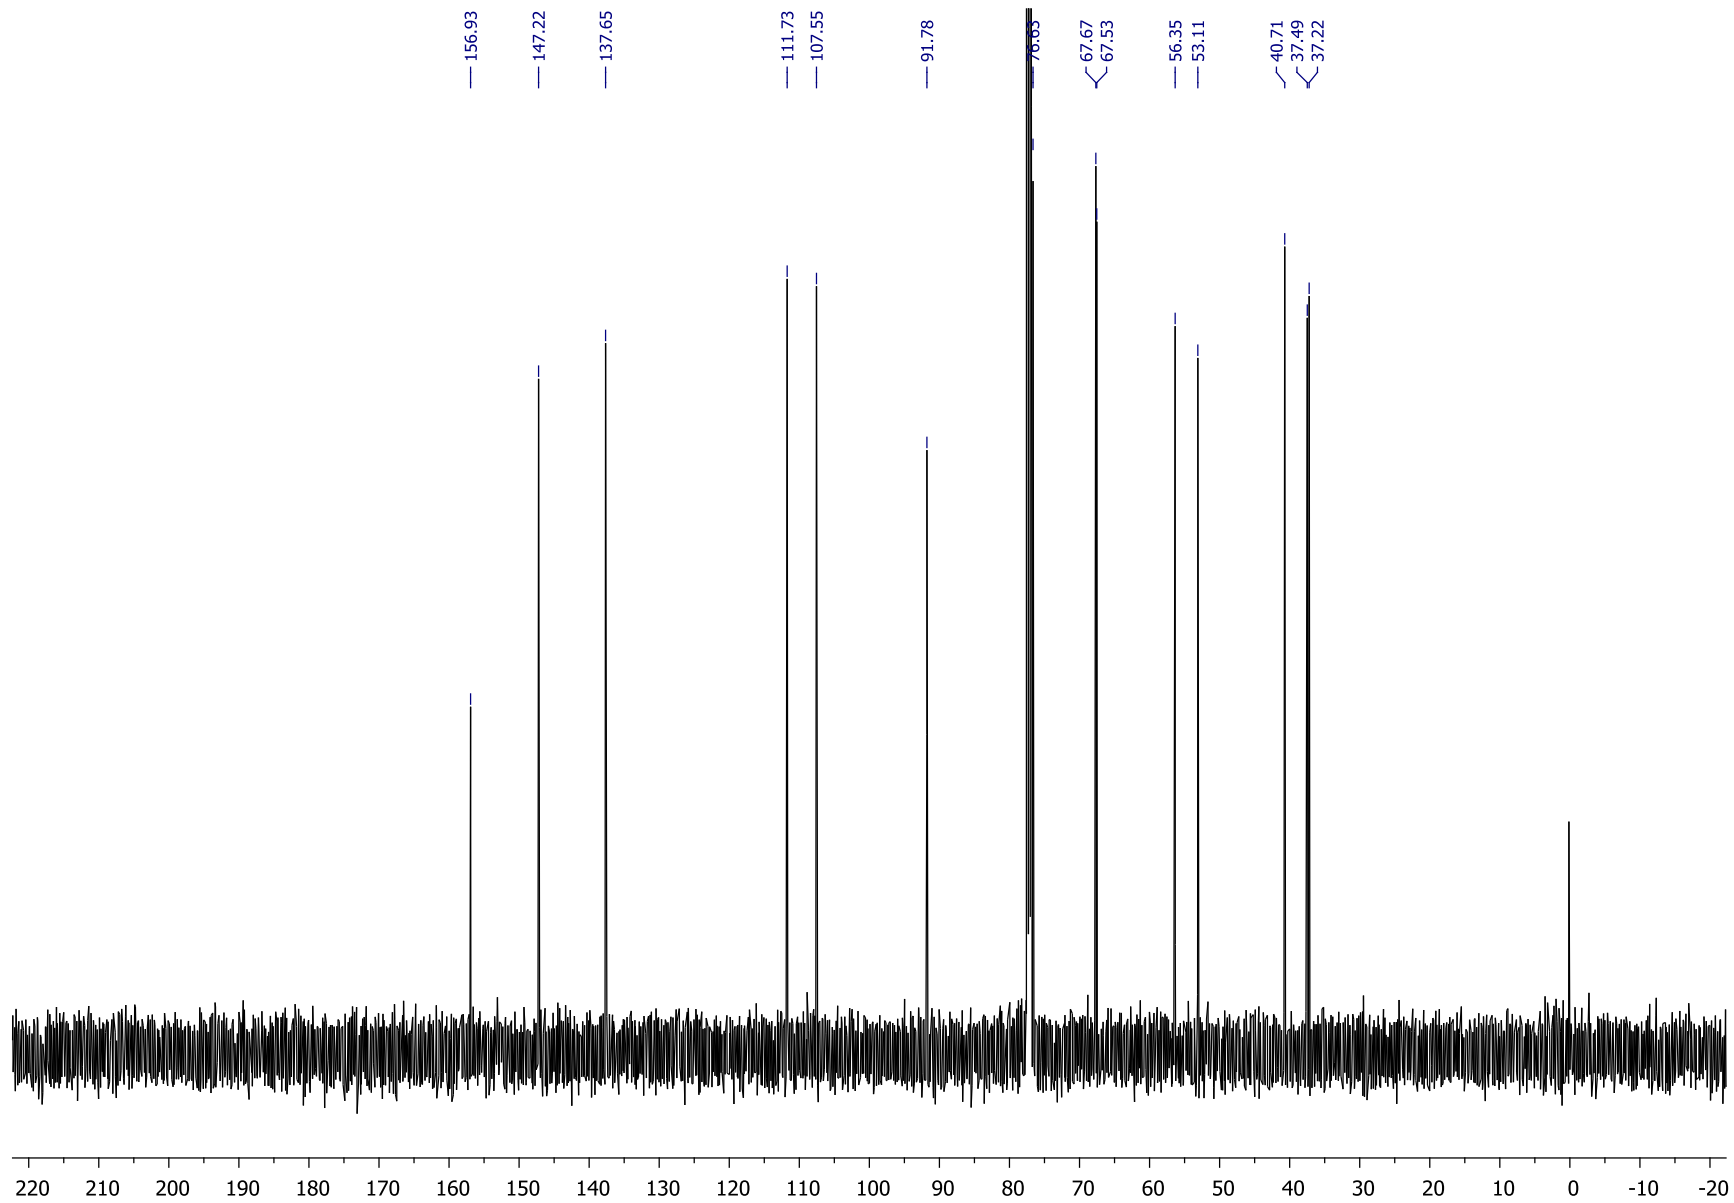

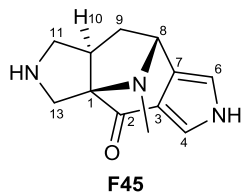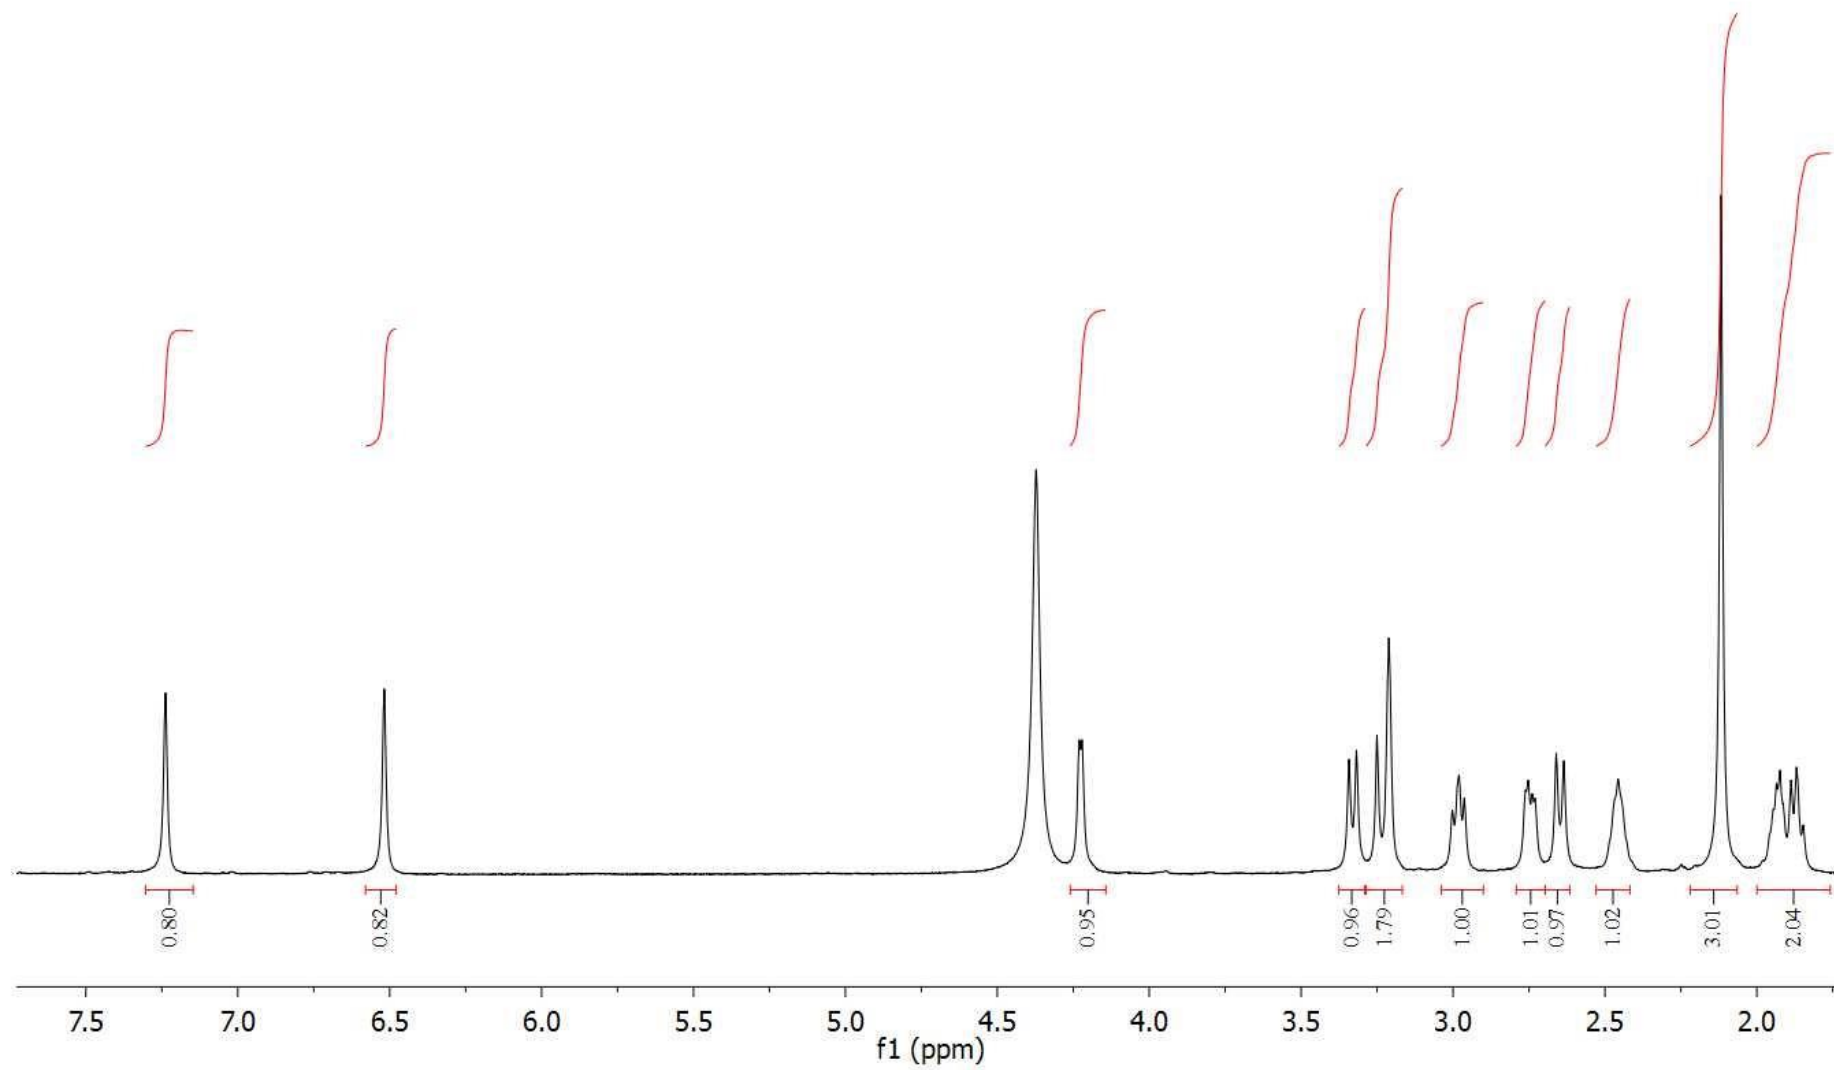

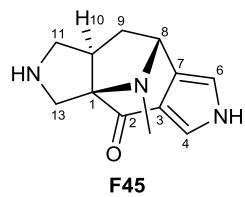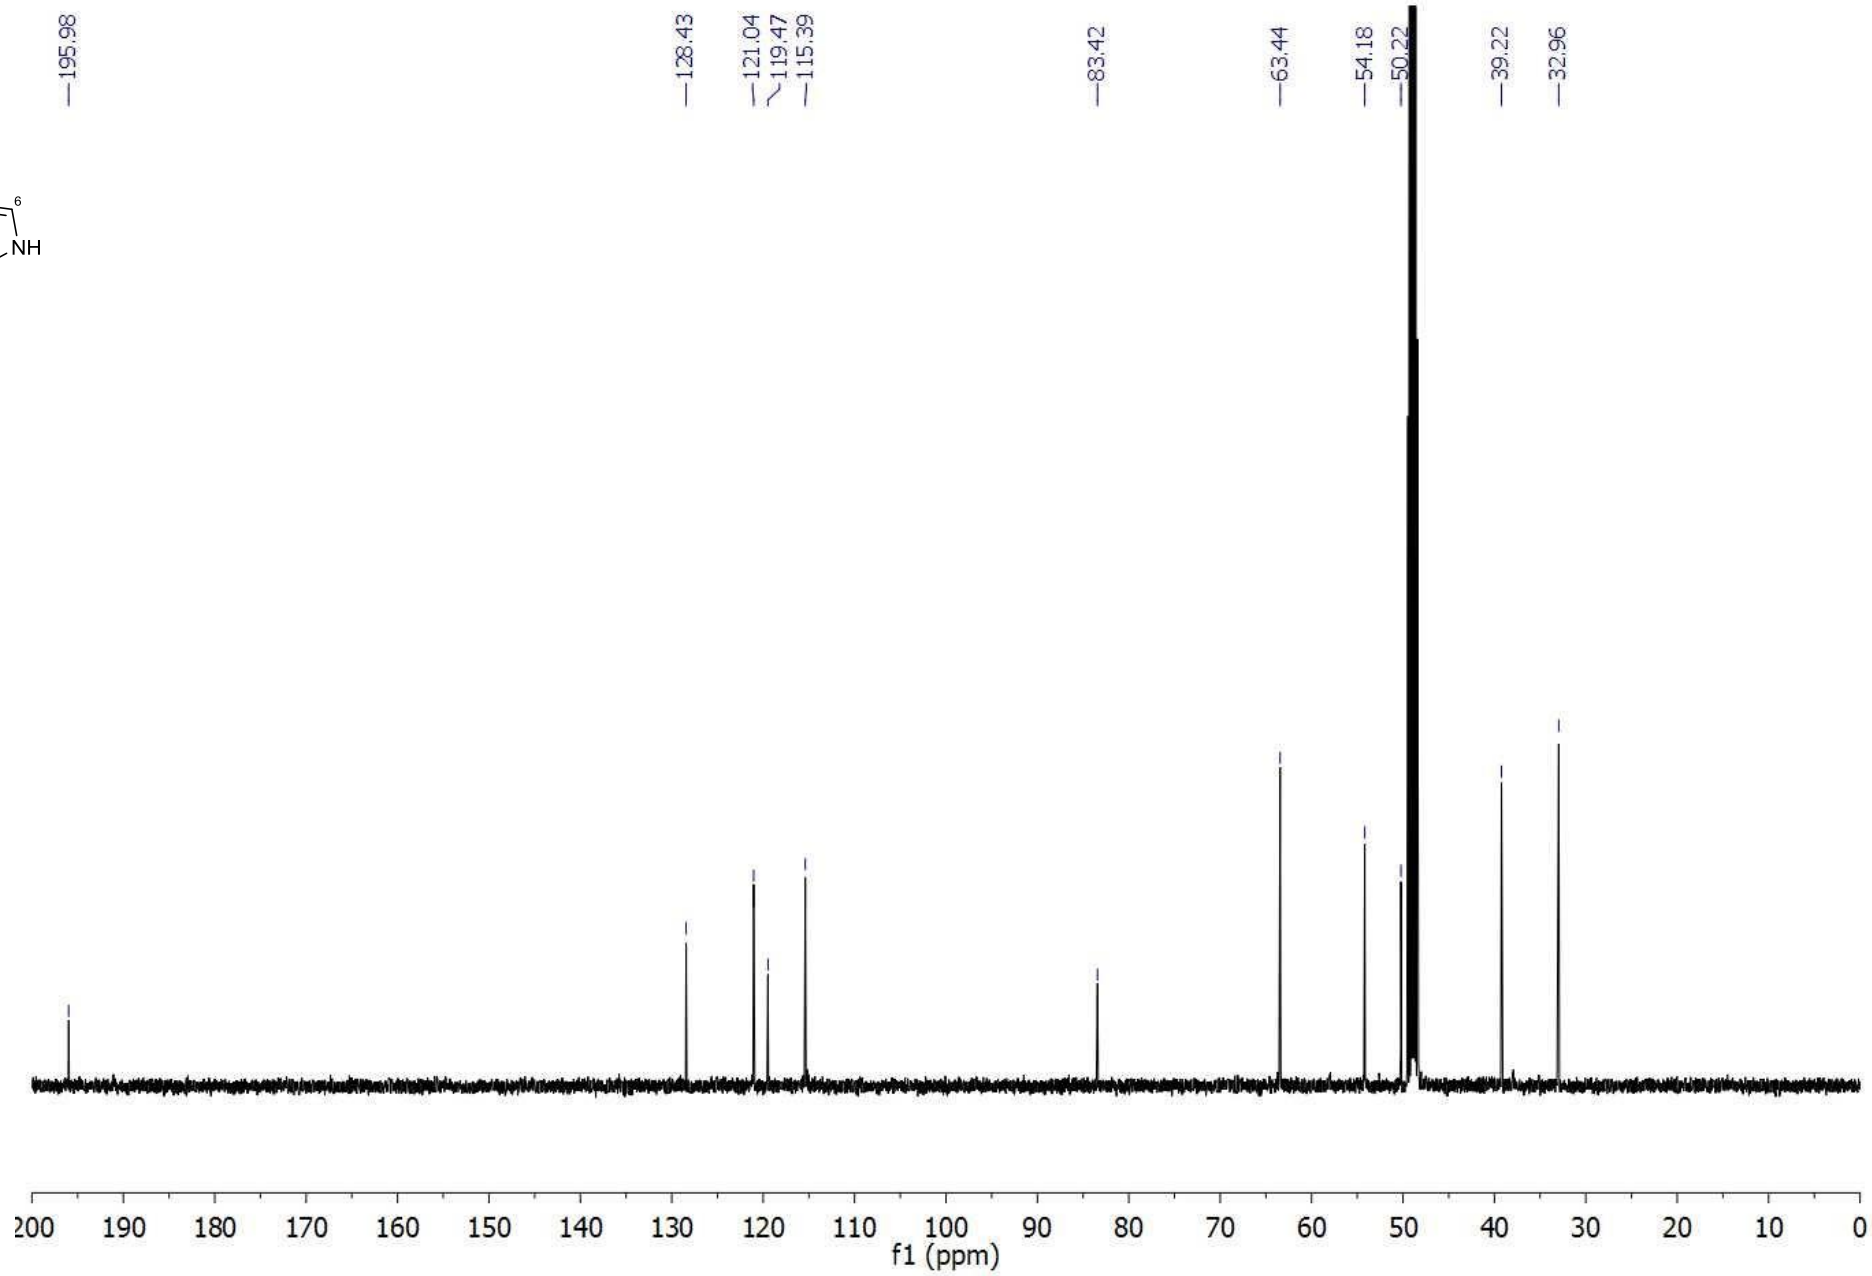

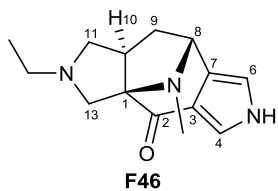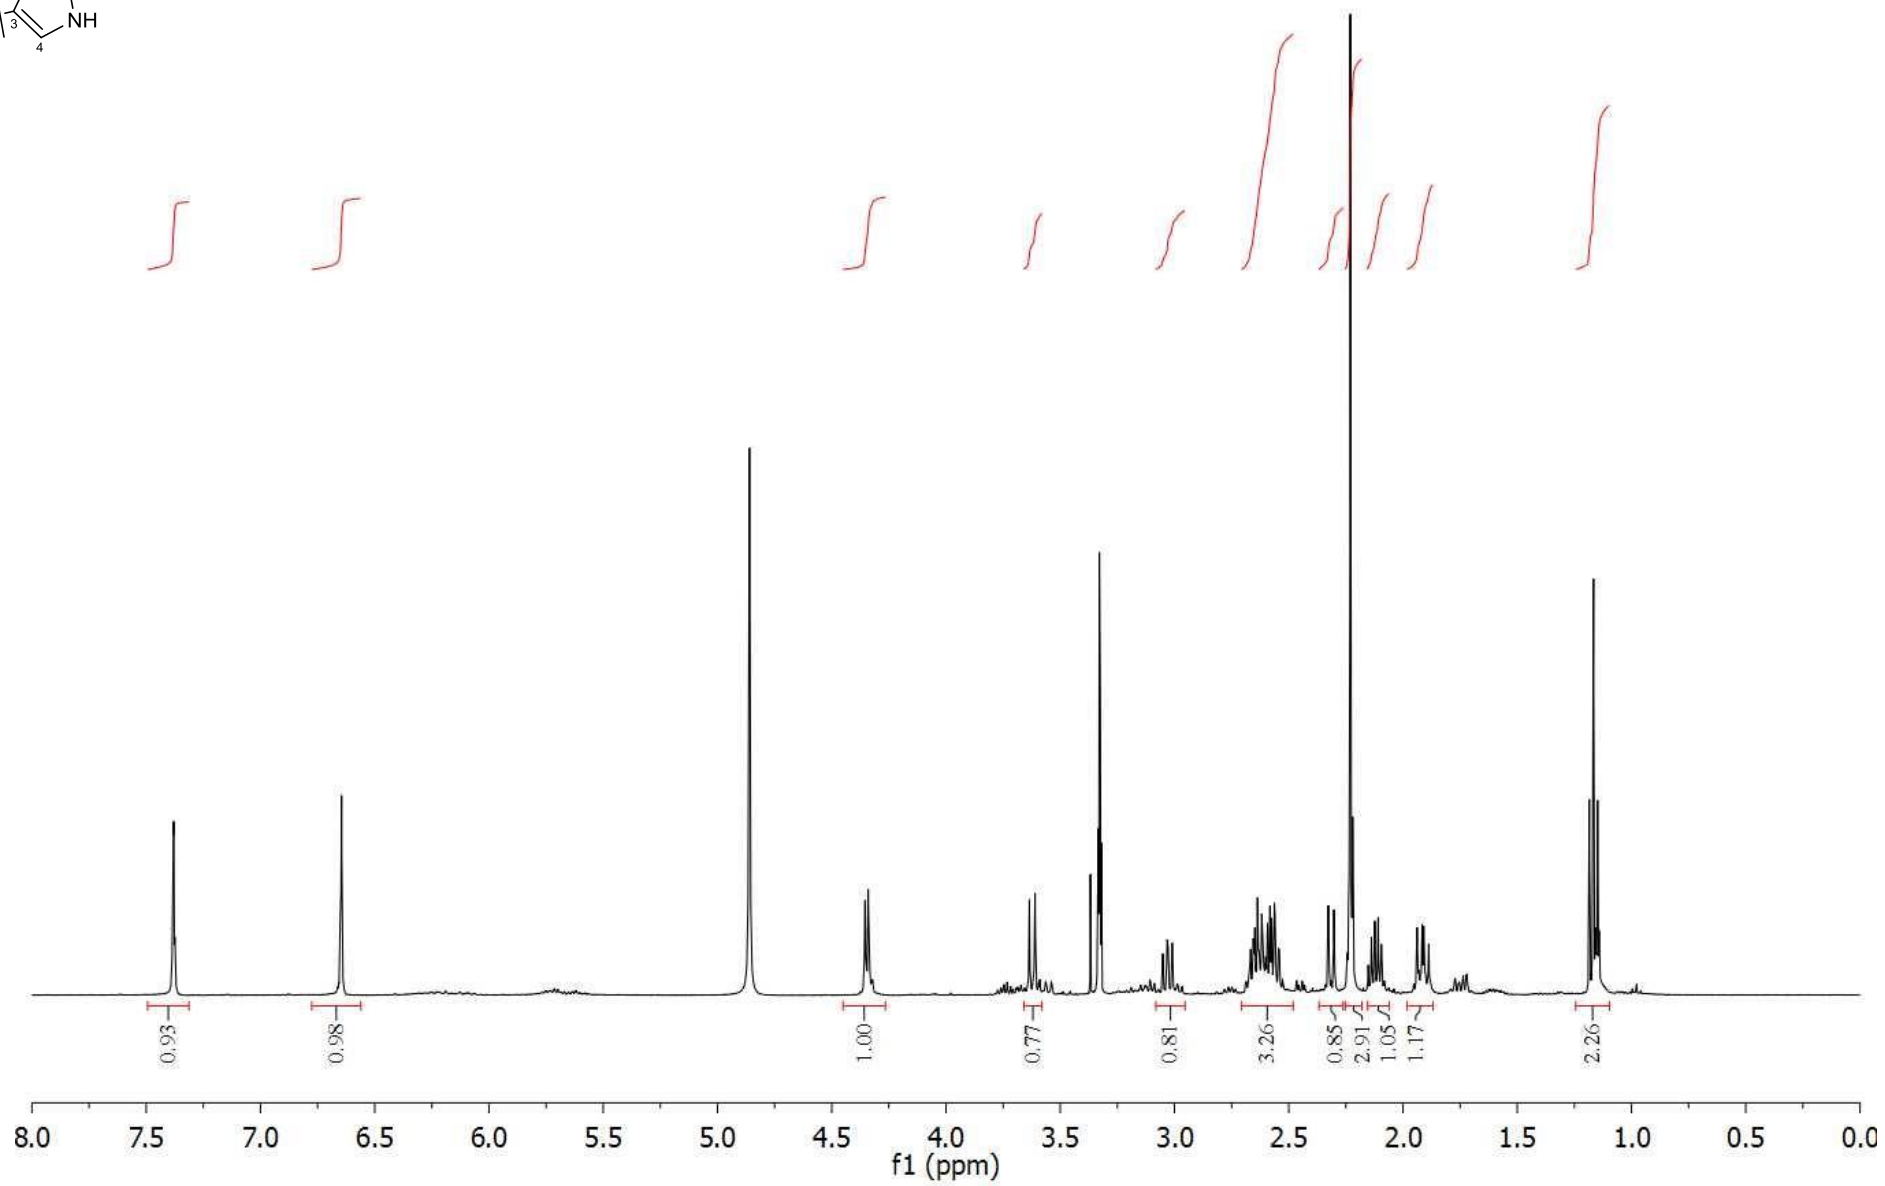

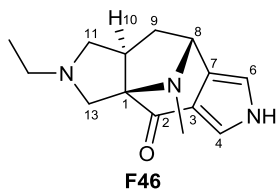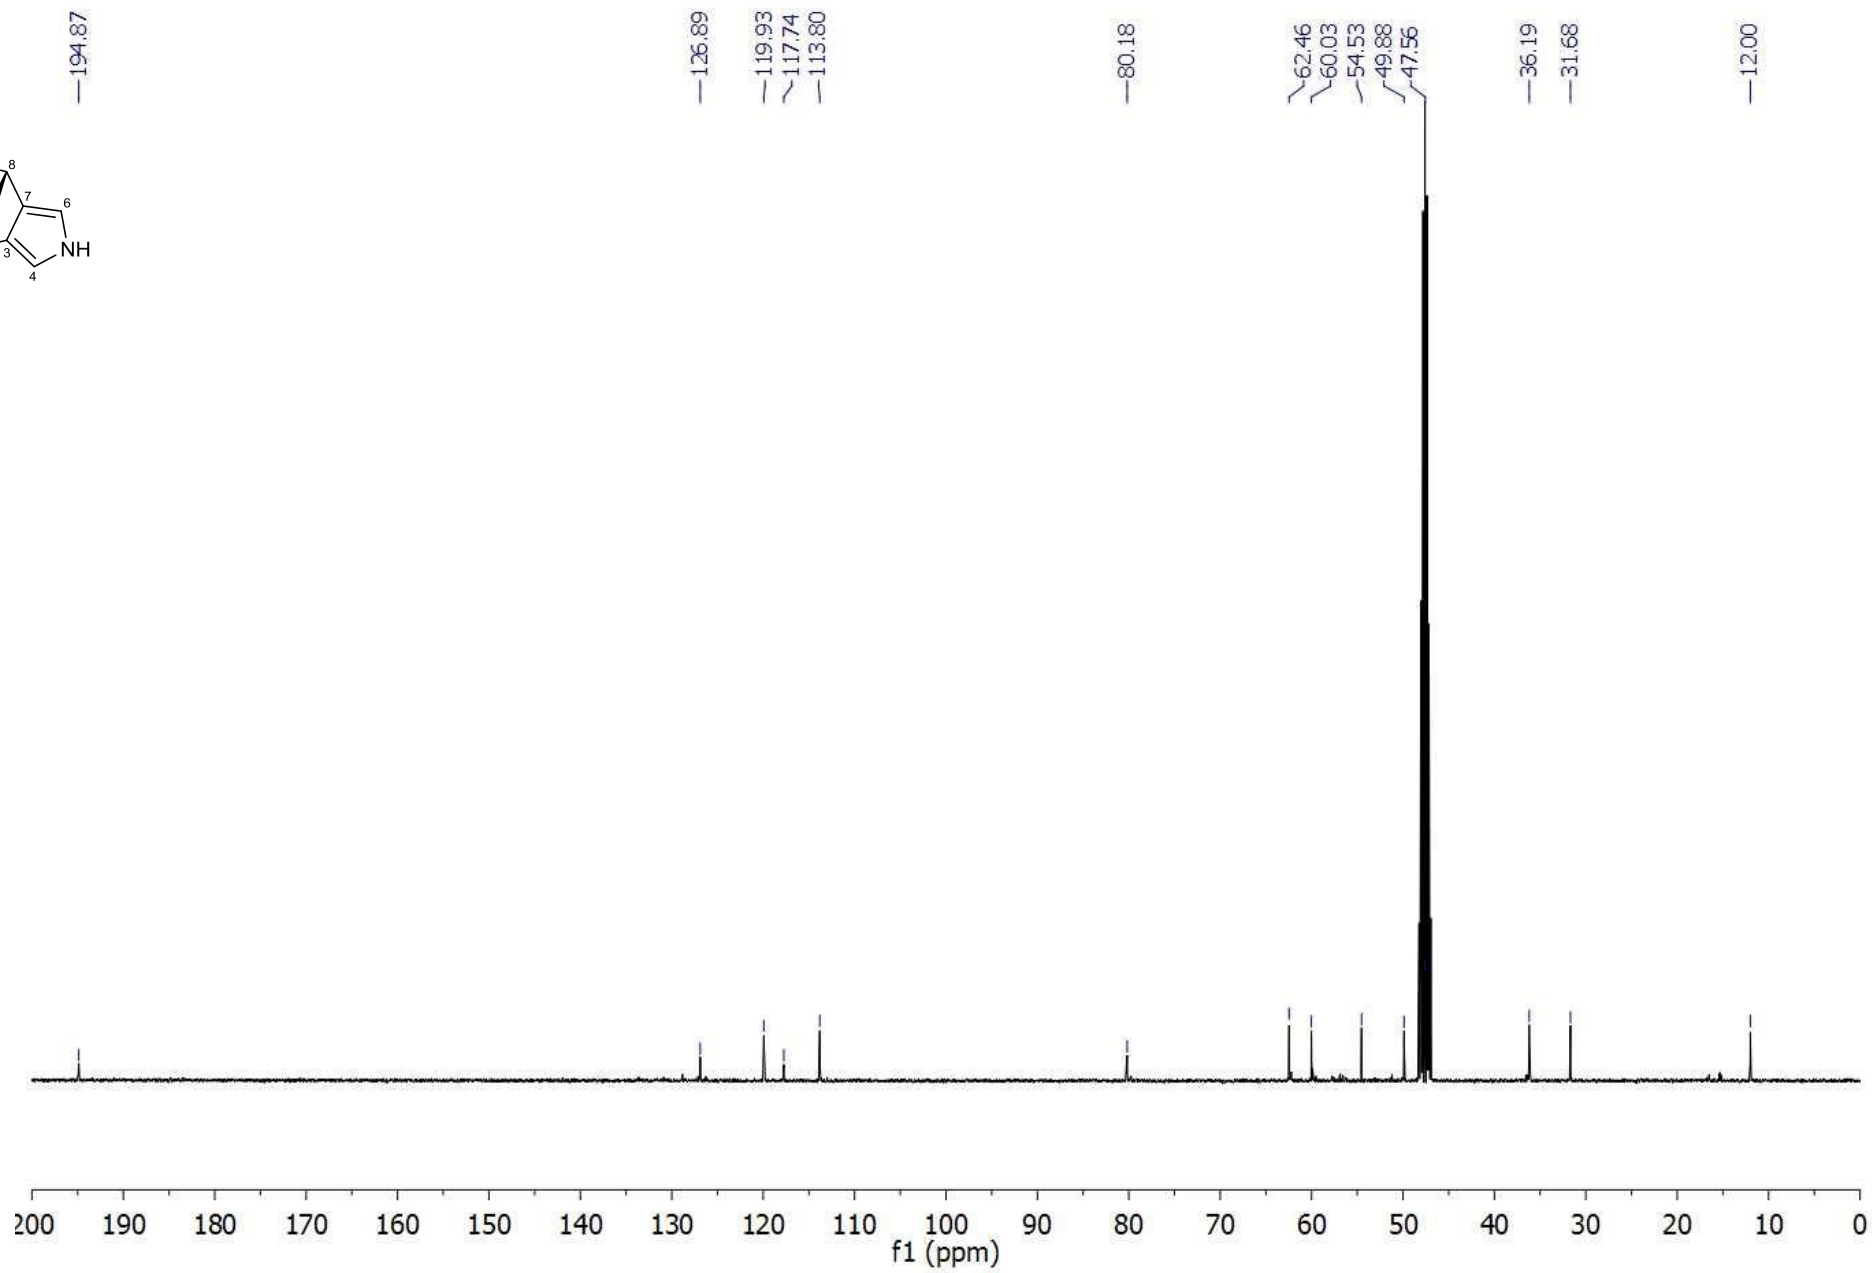

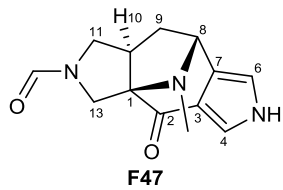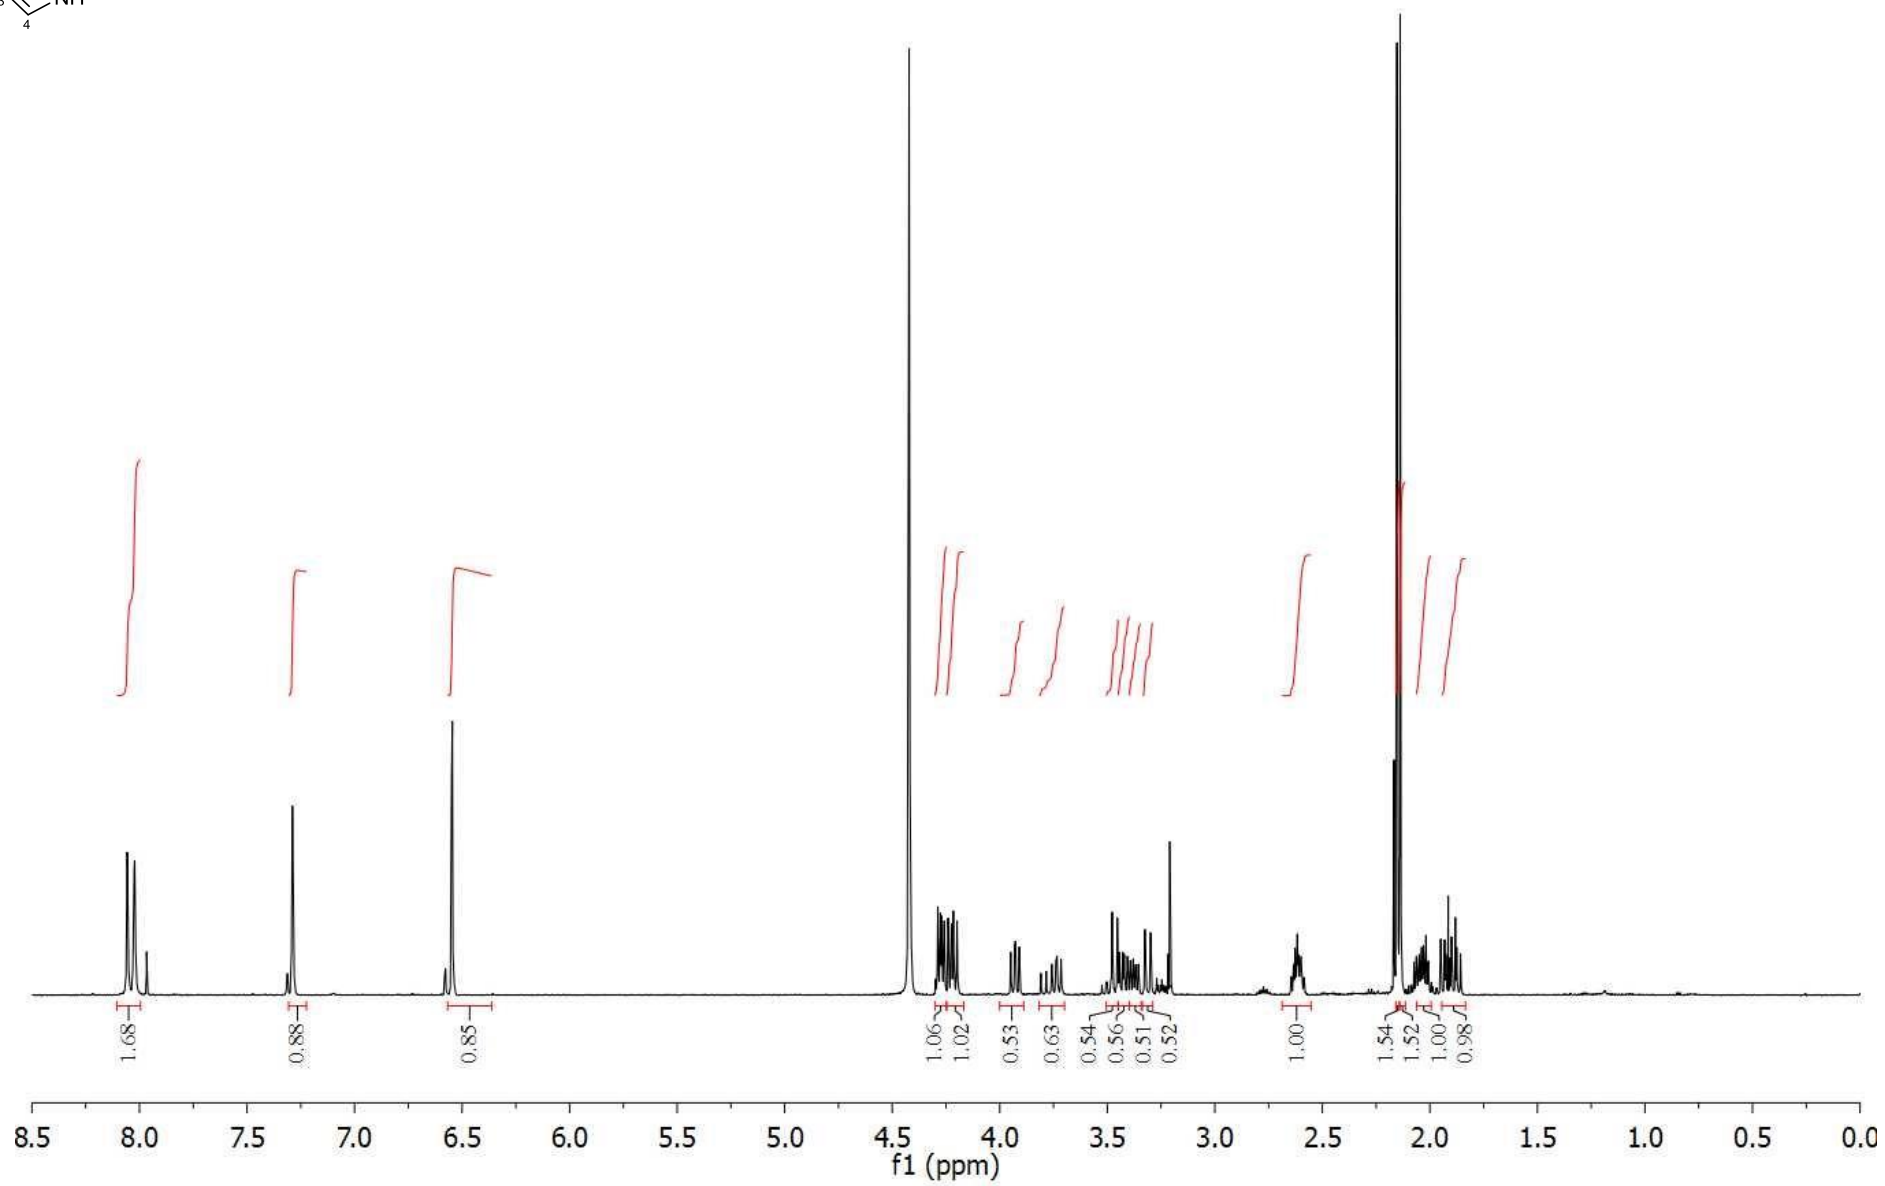

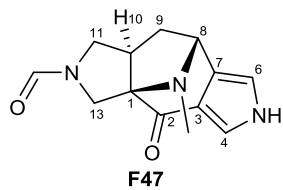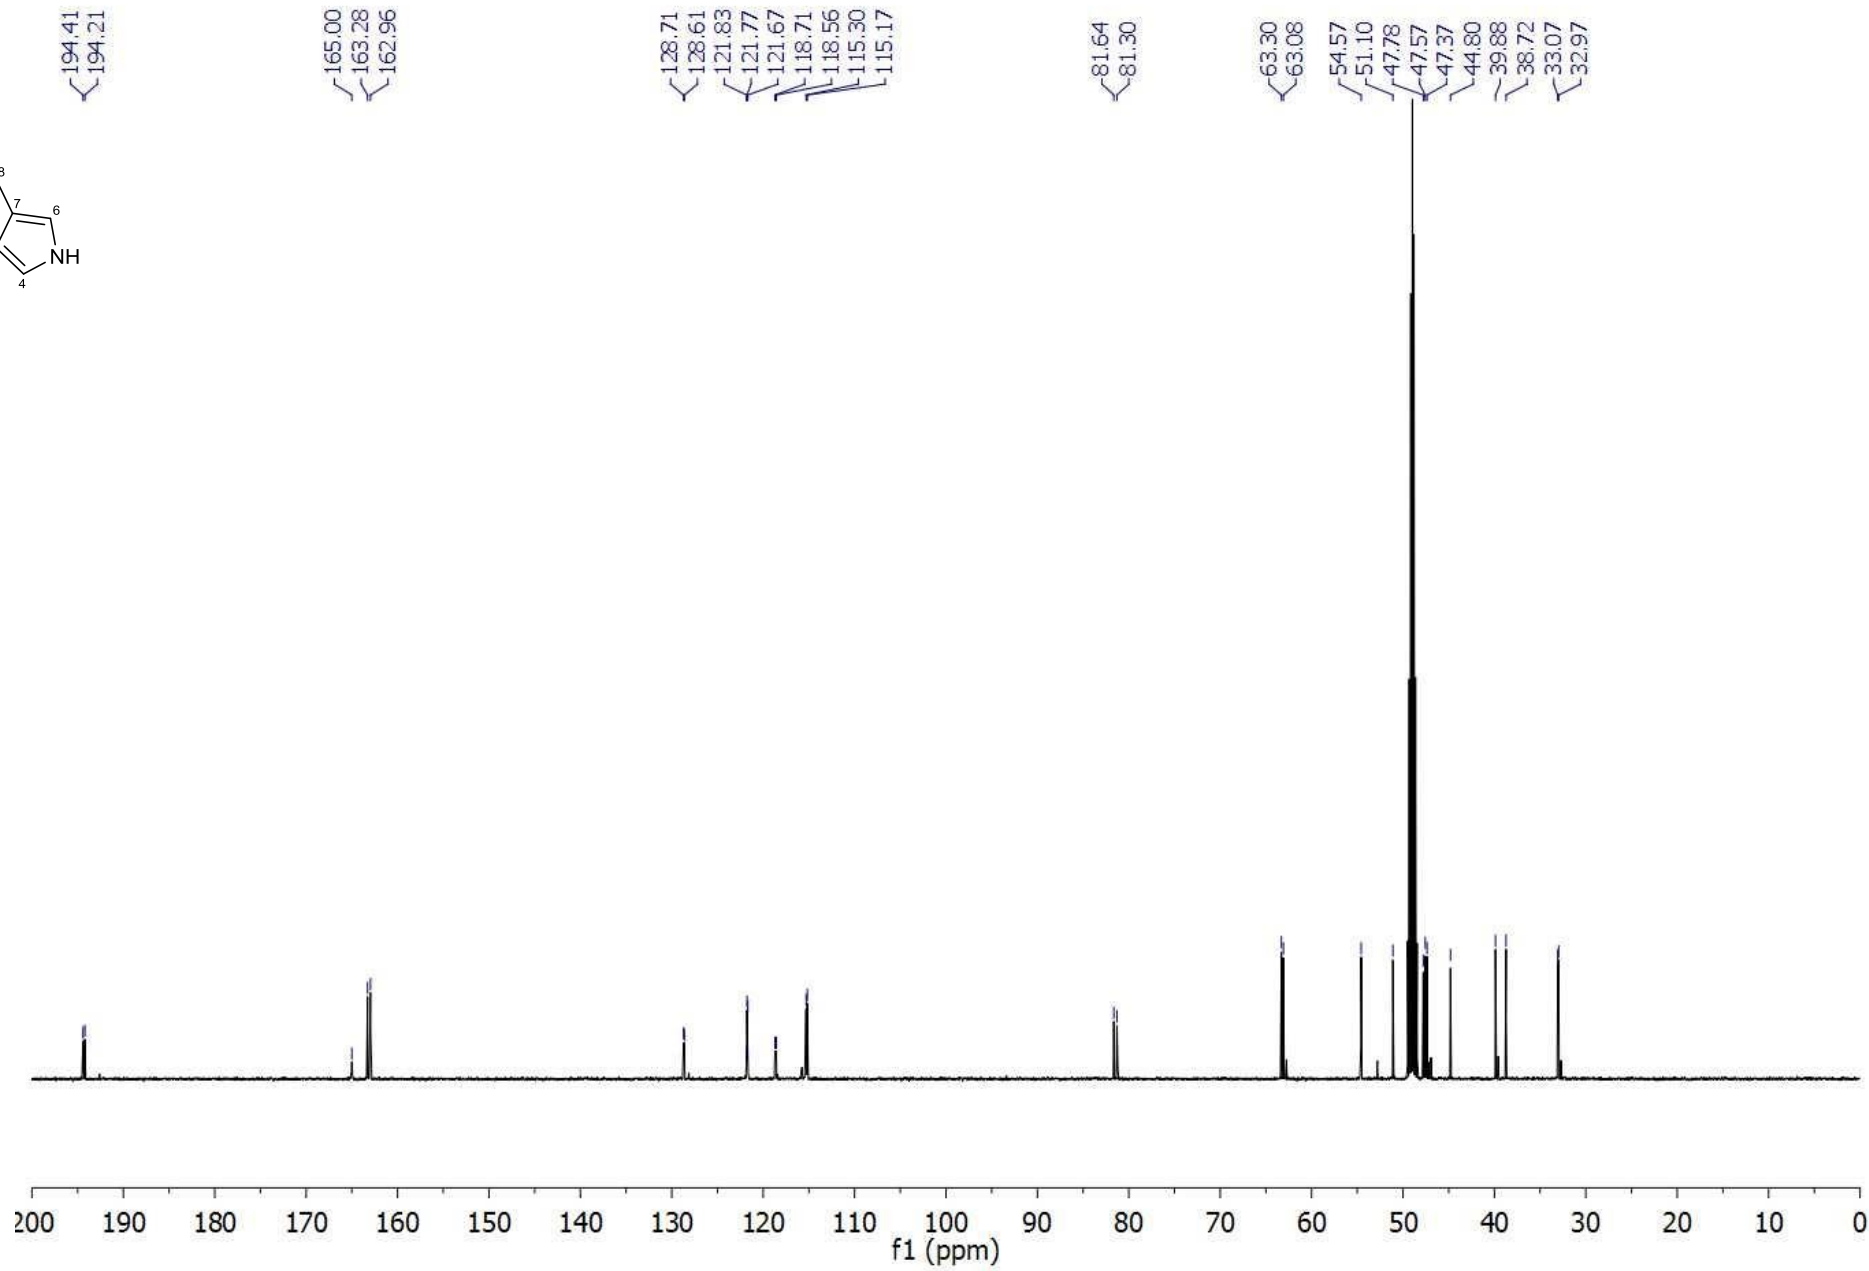



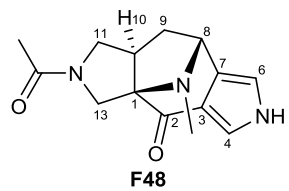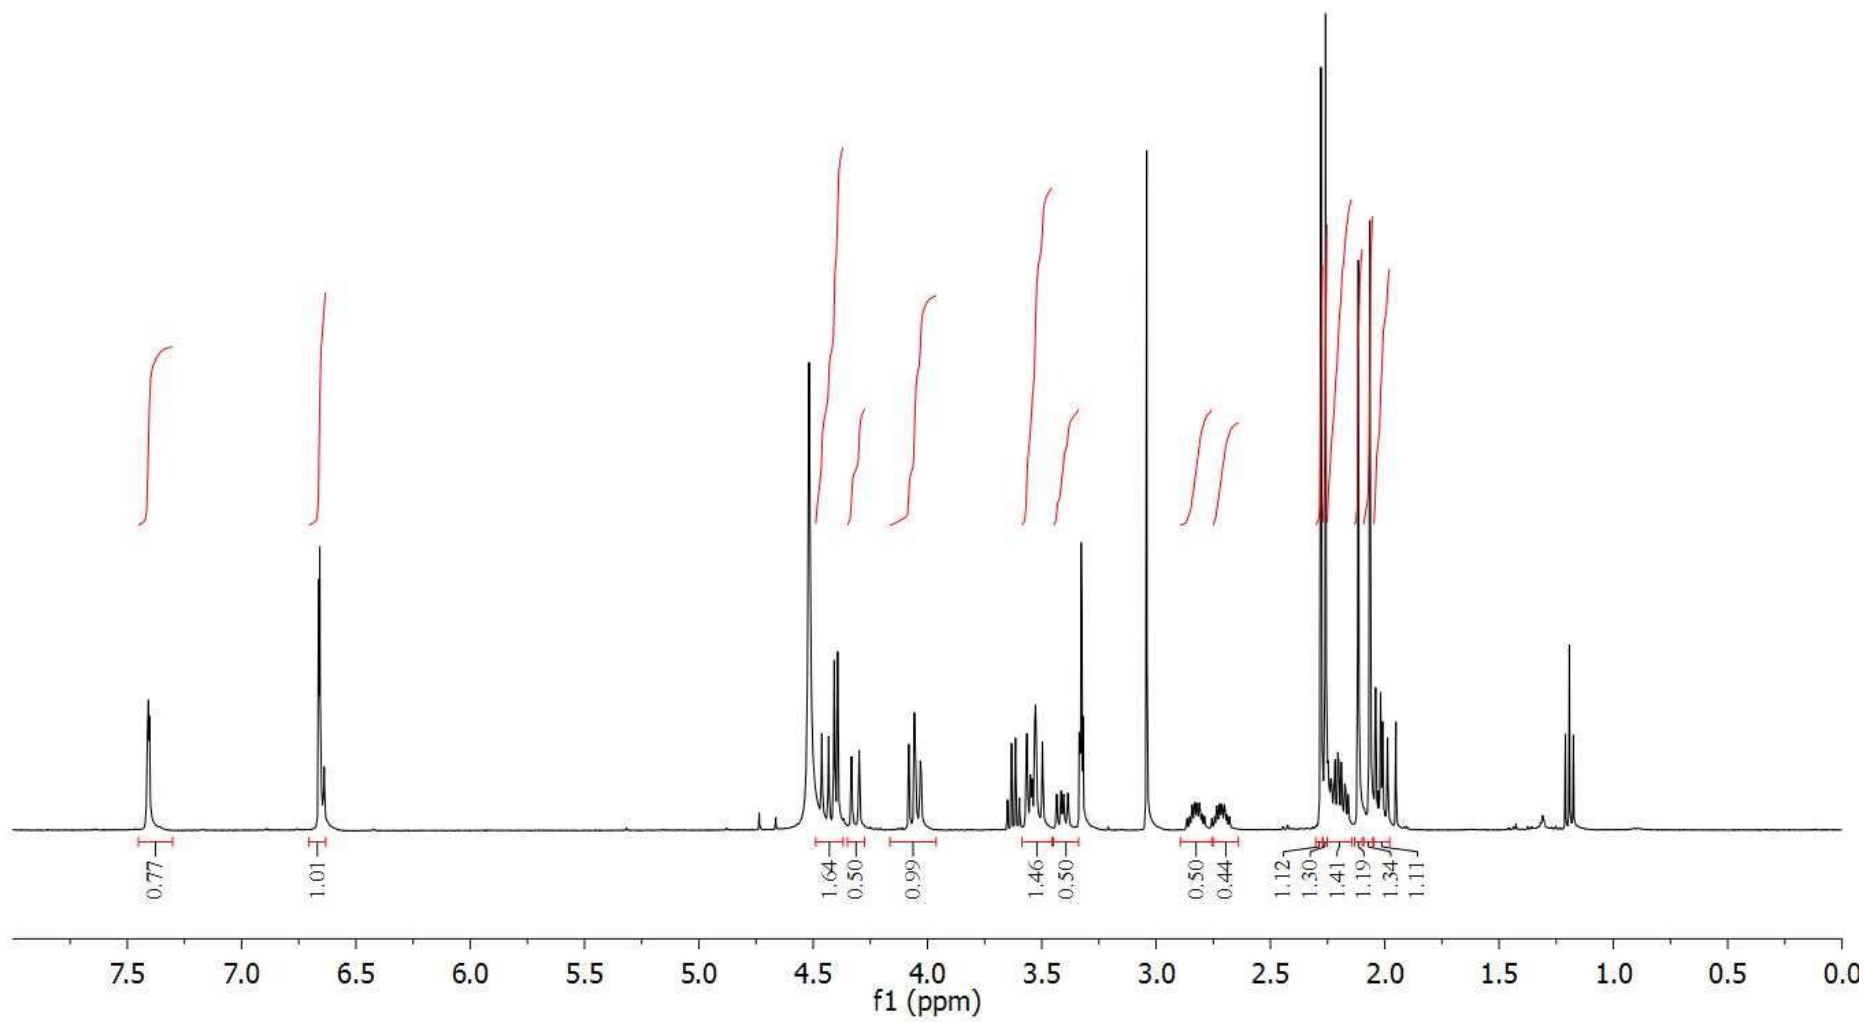

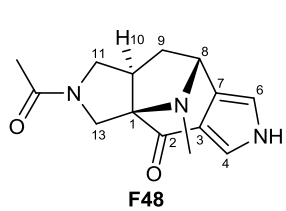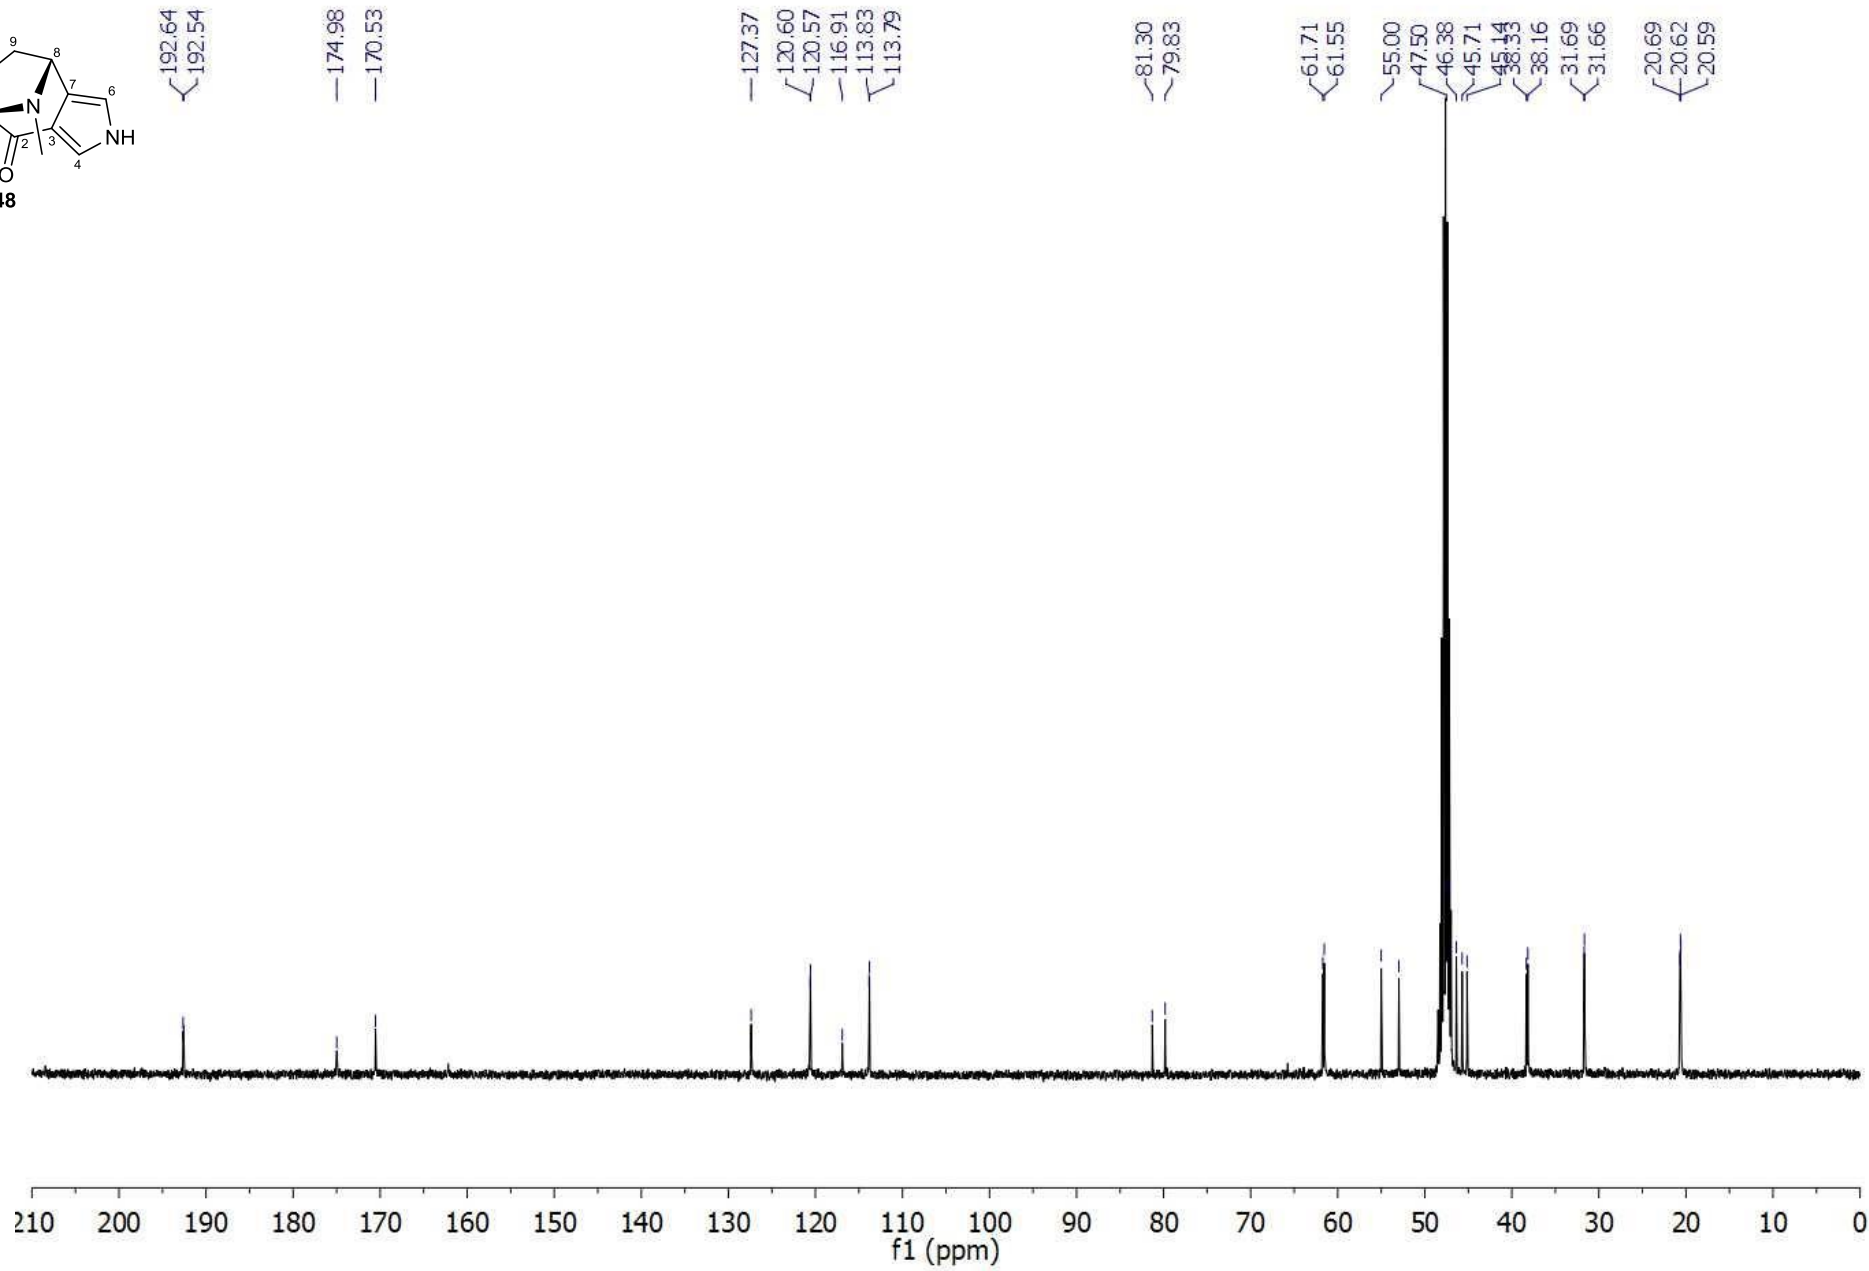

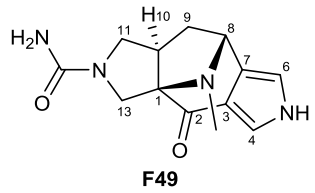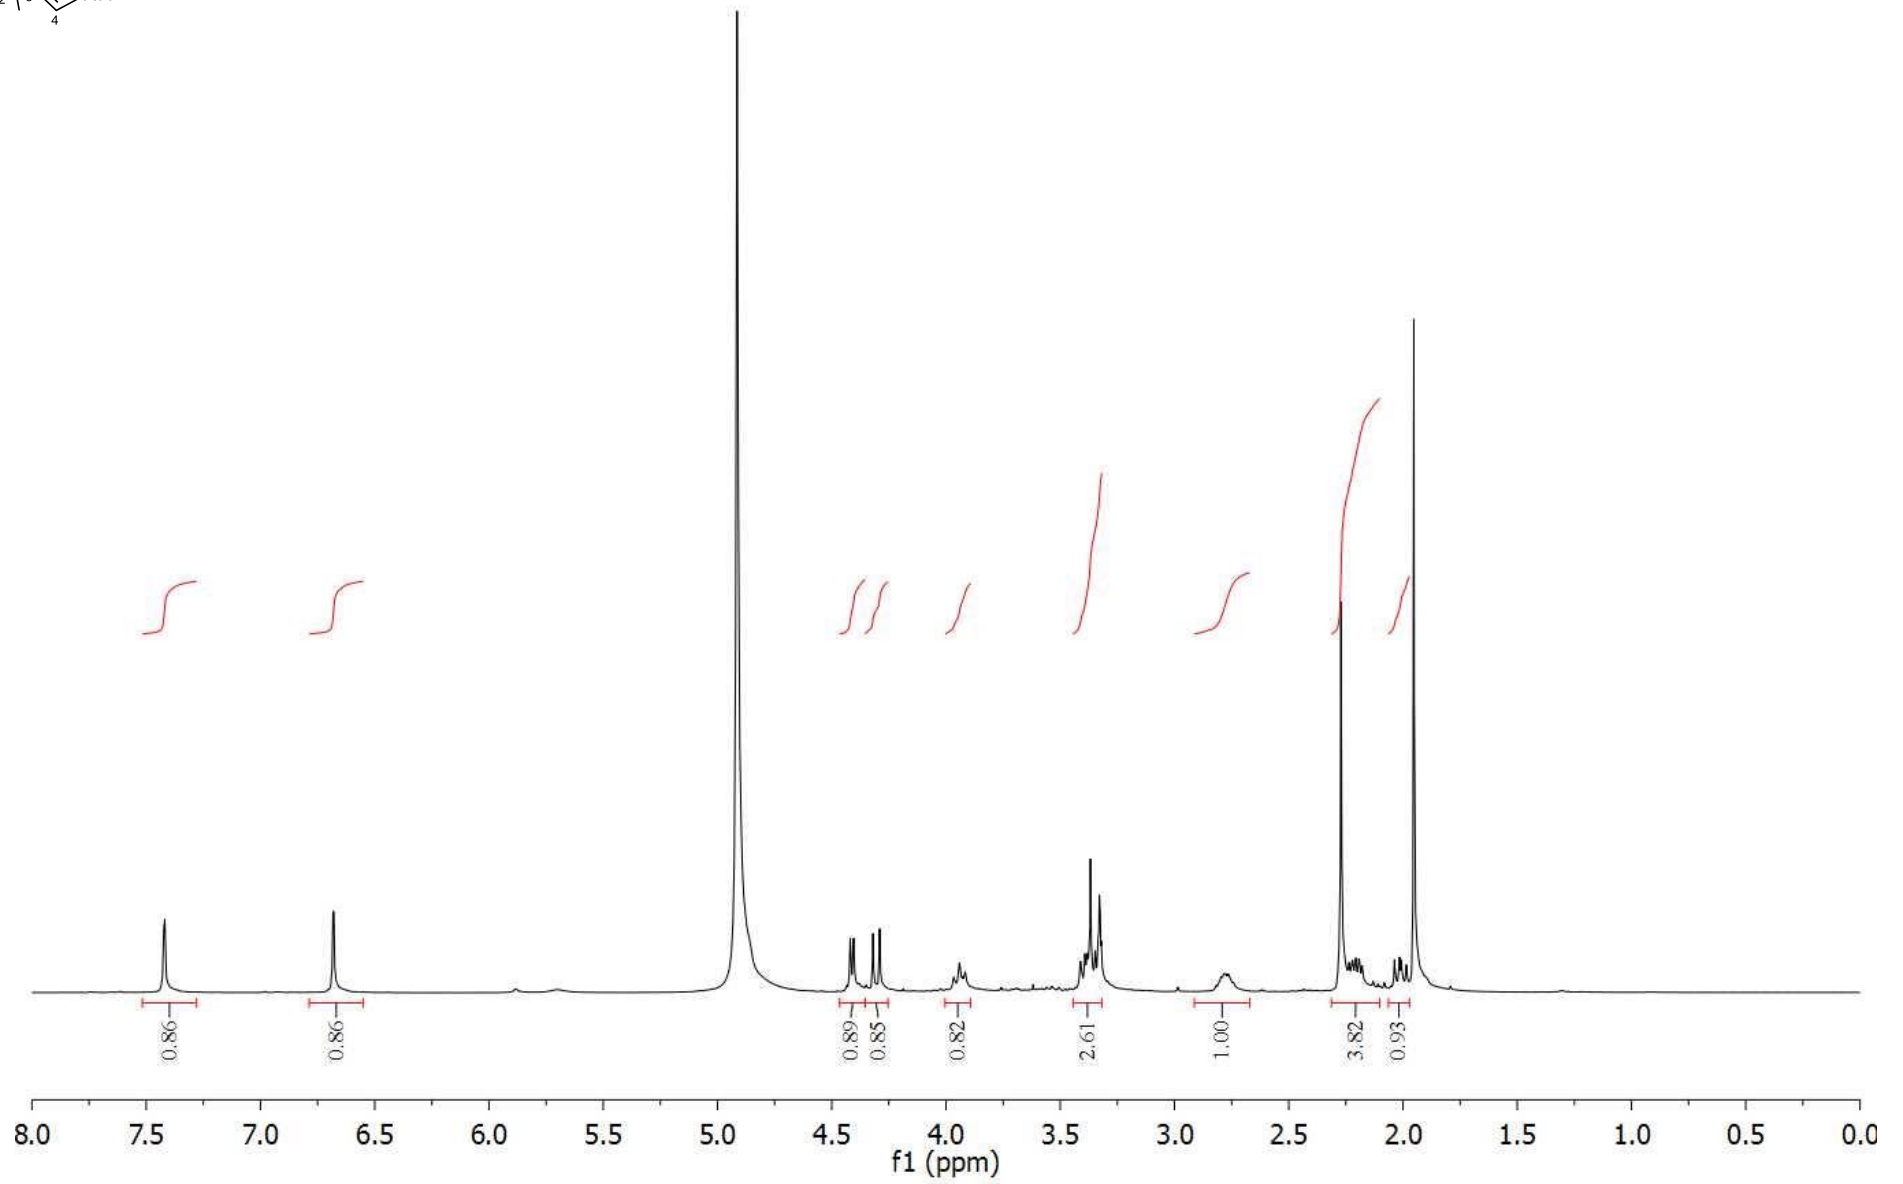

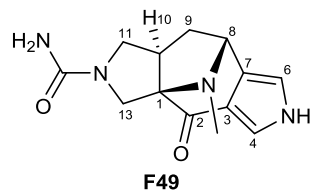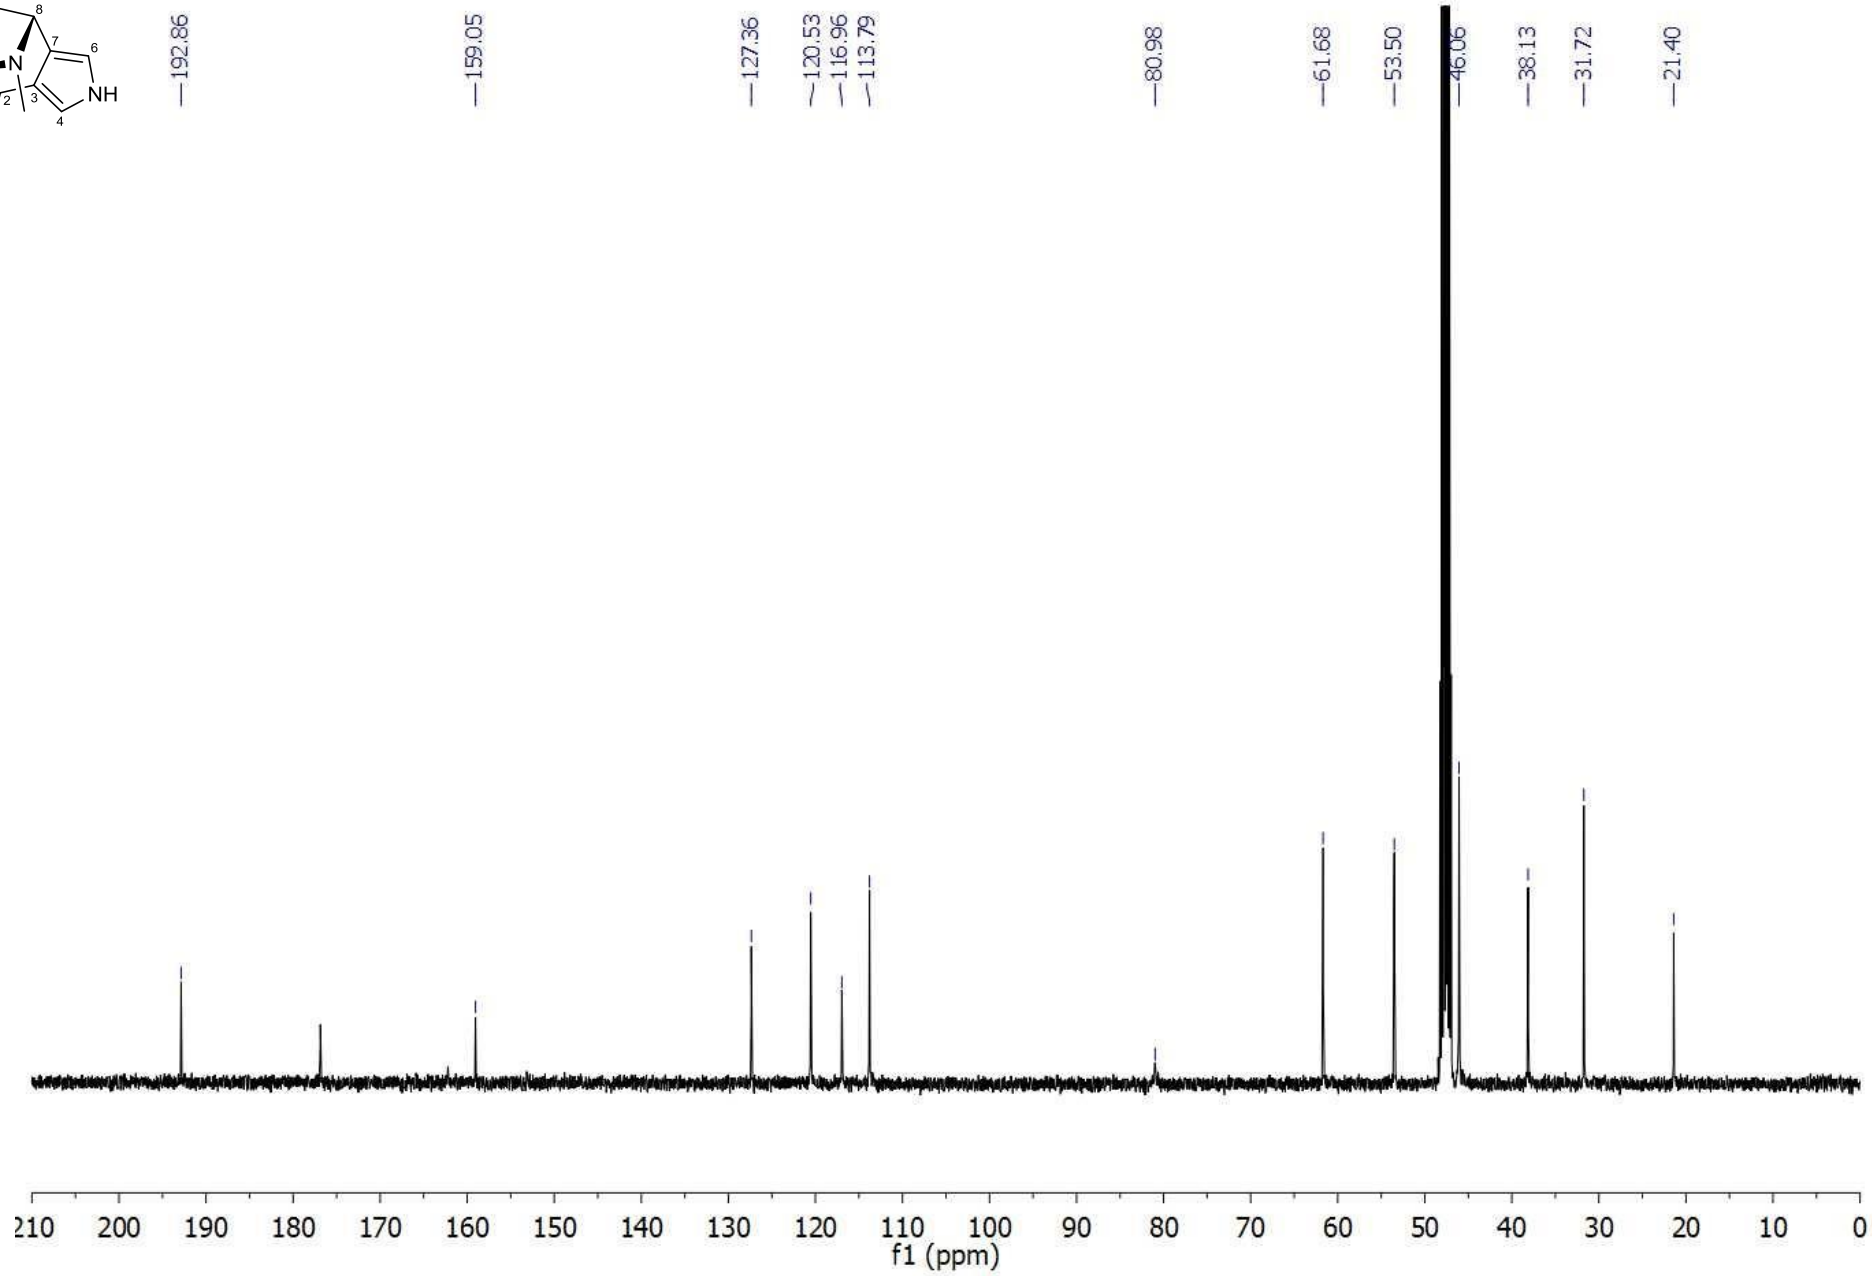

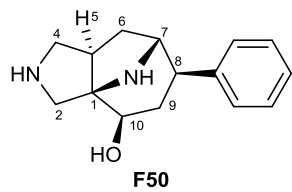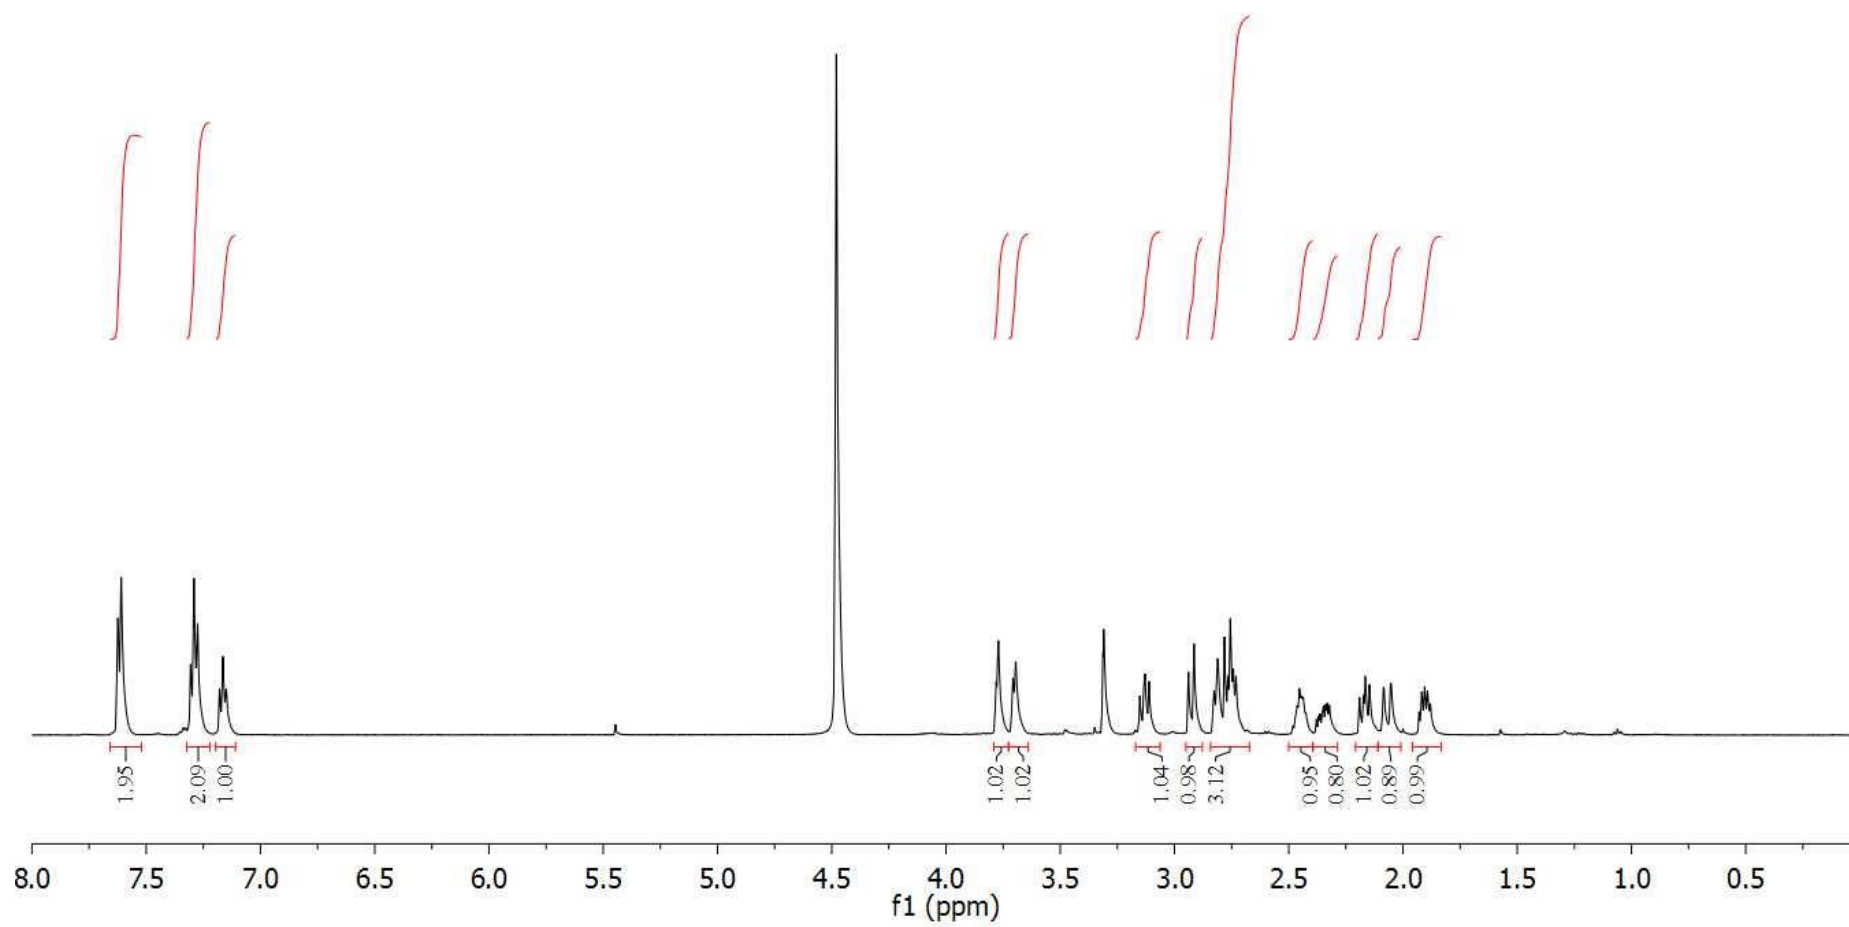

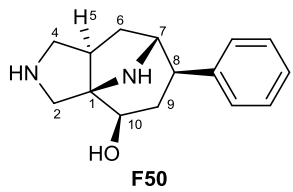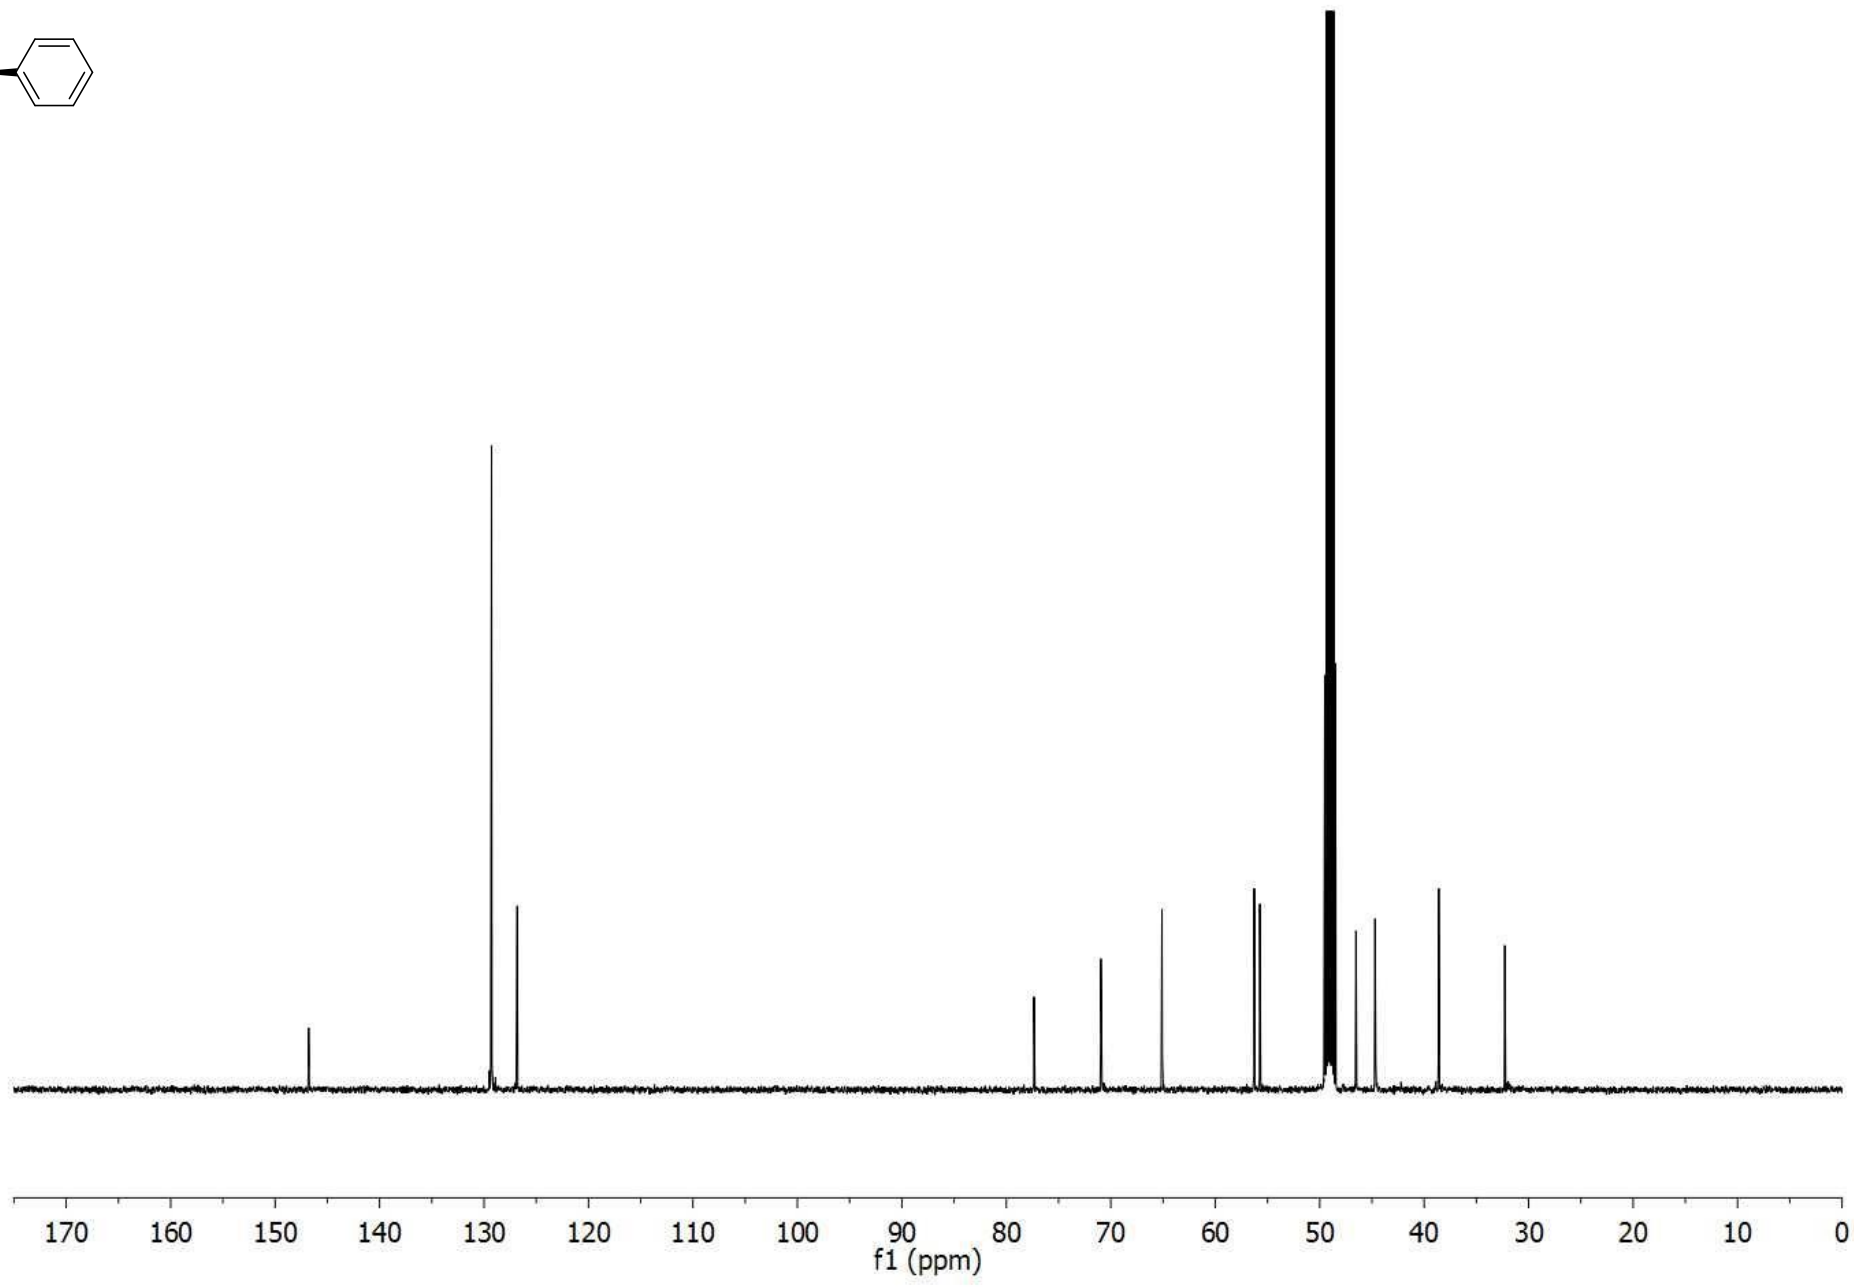

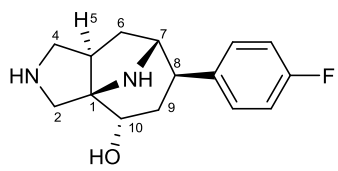

F51

+

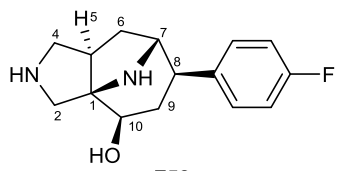

F52

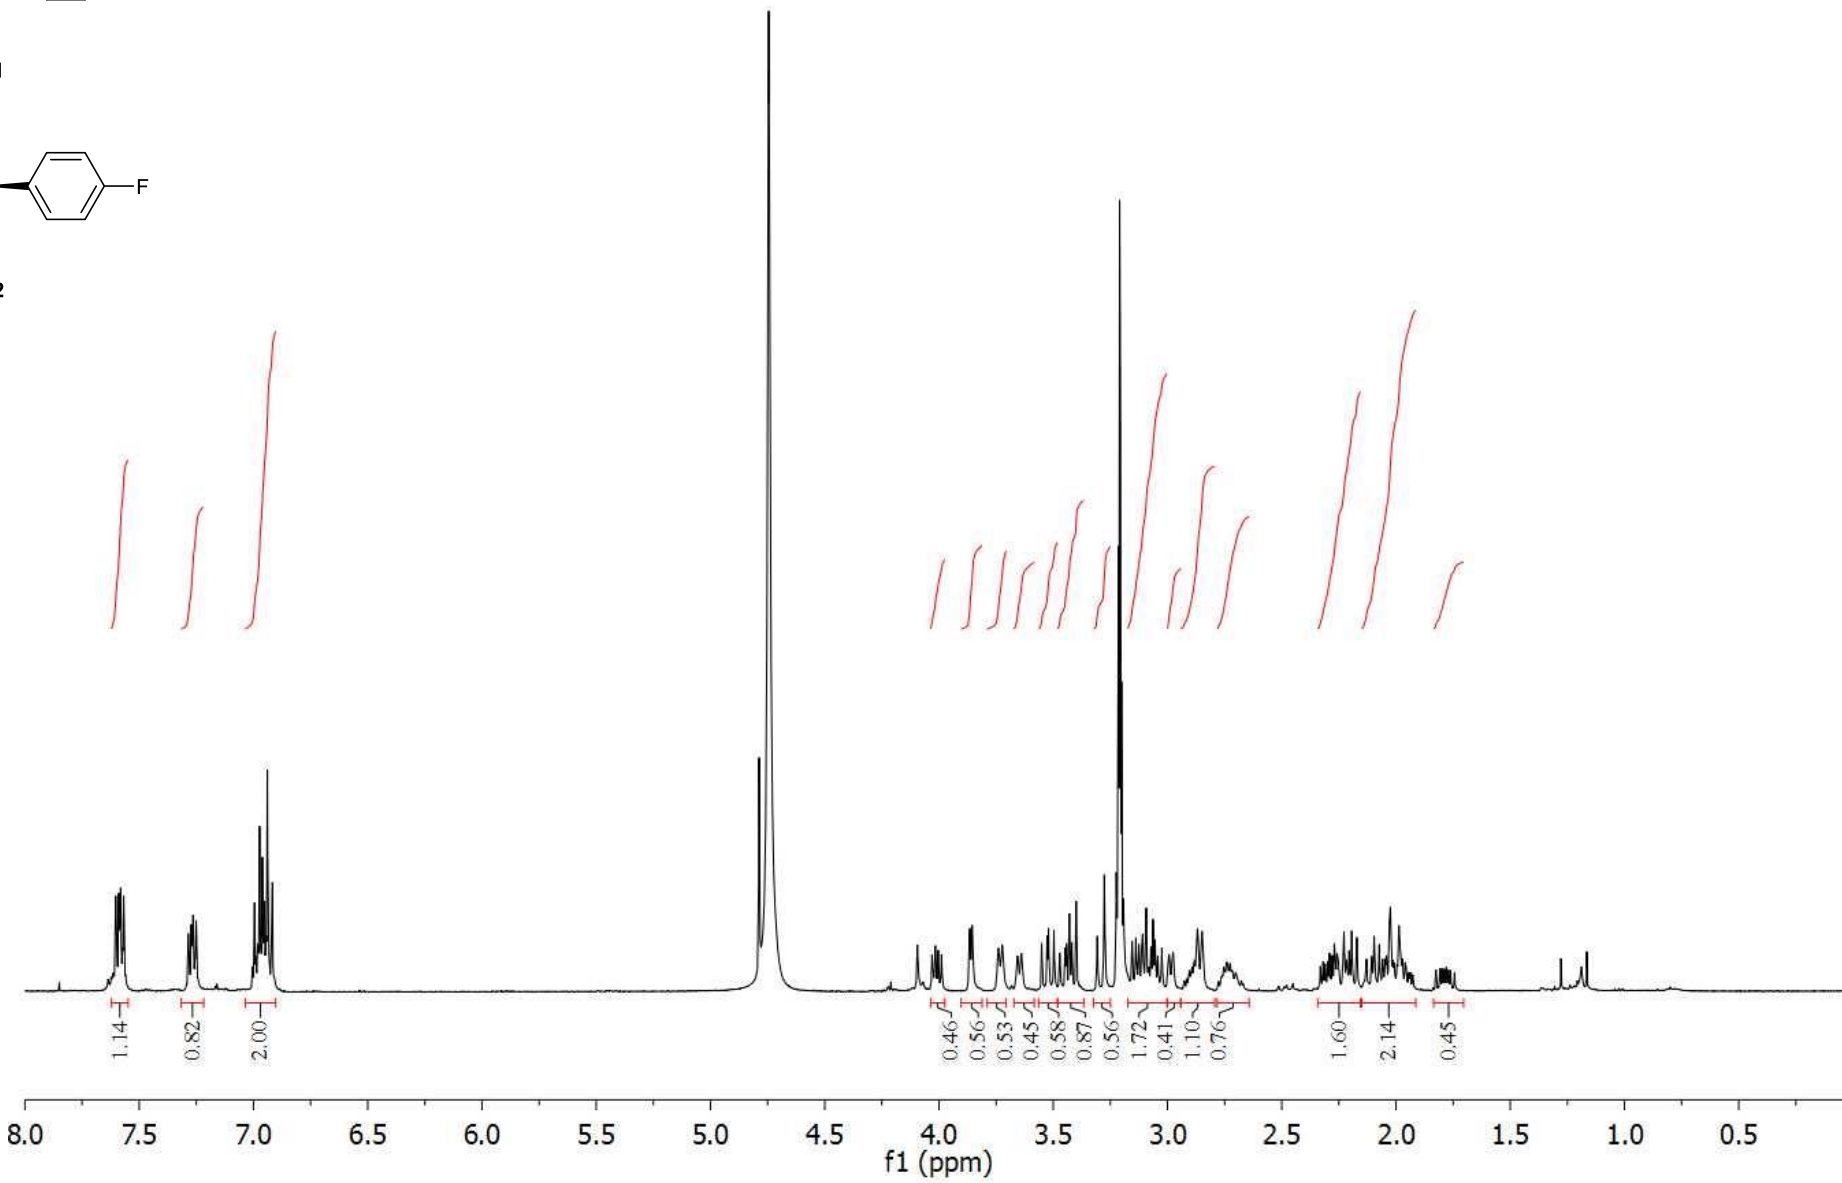

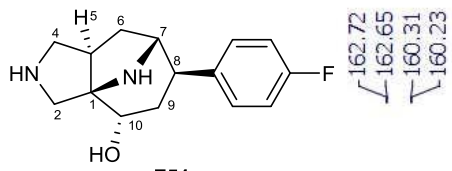

F51  
+

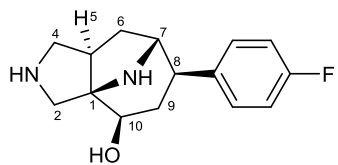

F52

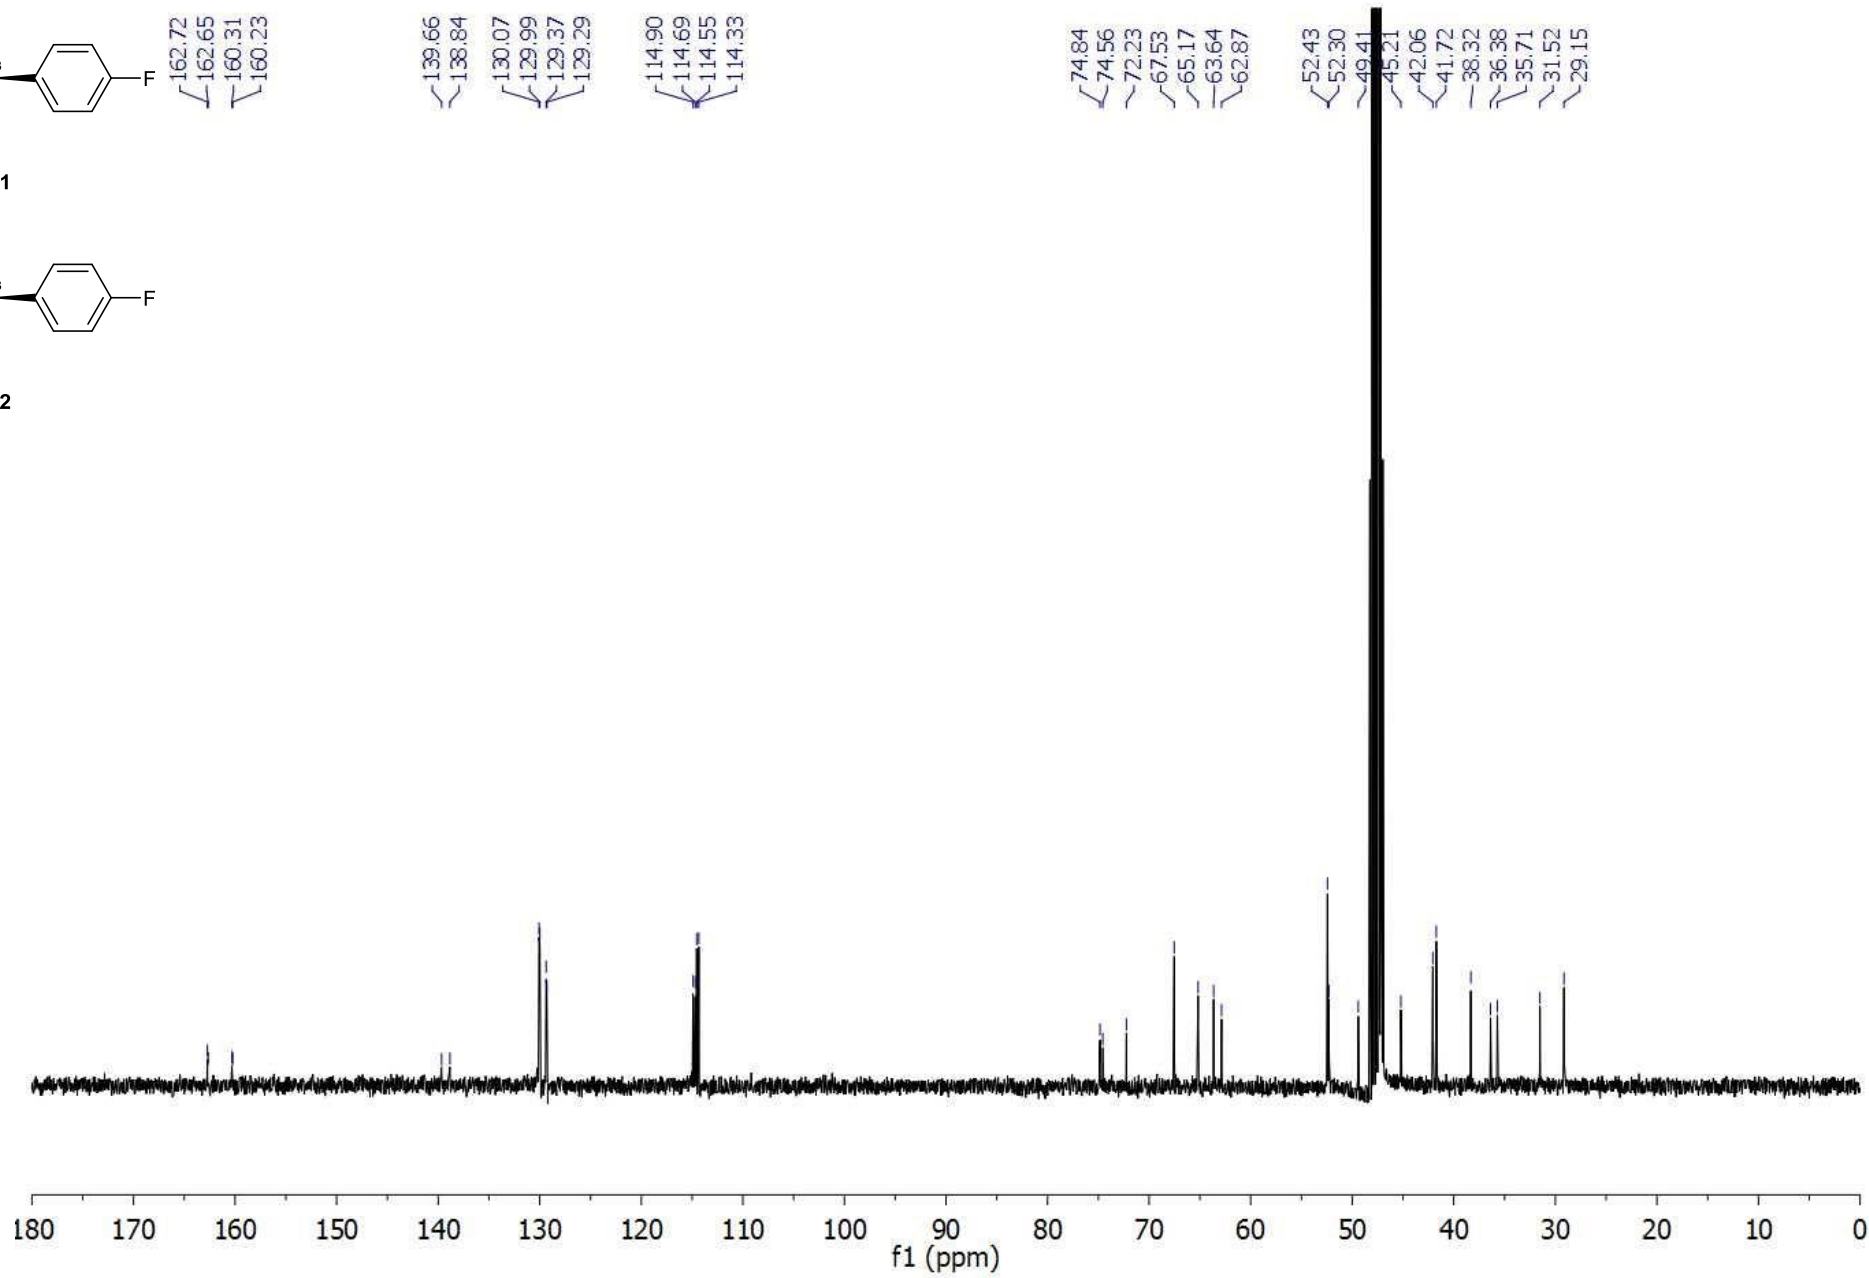



## 8.0 References (including full references from the paper with >10 authors)

- [S1] A. Chaikuad, A. M. Petros, O. Fedorov, J. Xu, S. Knapp, *Medhemcomm* **2014**, *5*, 1843–1848.
- [S2] M. J. Harner, B. A. Chauder, J. Phan, S. W. Fesik, *J. Med. Chem.* **2014**, *57*, 9687–9692.
- [S3] E. H. Demont, C. Chung, R. C. Furze, P. Grandi, A.-M. Michon, C. Wellaway, N. Barrett, A. M. Bridges, P. D. Craggs, H. Diallo, D. P. Dixon, C. Douault, A. J. Emmons, E. J. Jones, B. V. Karamshi, K. Locke, D. J. Mitchell, B. H. Mouzon, R. K. Prinjha, A. D. Roberts, R. J. Sheppard, R. J. Watson, P. Bamborough, *J. Med. Chem.* **2015**, *58*, 5649–5673.
- [S4] G. Poncet-Montange, Y. Zhan, J. P. Bardenhagen, A. Petrocchi, E. Leo, X. Shi, G. R. Lee, P. G. Leonard, M. K. Geck Do, M. G. Cardozo, J. N. Andersen, W. S. Palmer, P. Jones, J. E. Ladbury, *Biochem. J.* **2015**, *466*.
- [S5] P. Bamborough, C. Chung, E. H. Demont, R. C. Furze, A. J. Bannister, K. H. Che, H. Diallo, C. Douault, P. Grandi, T. Kouzarides, A.-M. Michon, D. J. Mitchell, R. K. Prinjha, C. Rau, S. Robson, R. J. Sheppard, R. Upton, R. J. Watson, *Angew. Chemie Int. Ed.* **2016**, *55*, 11382–11386.
- [S6] P. Ertl, S. Roggo, A. Schuffenhauer, *J. Chem. Inf. Model.* **2008**, *48*, 68–74.
- [S7] S. Miyazaki, S. Katoh, K. Adachi, H. Isoshima, S. Kobayashi, Y. Matsuzaki, W. Watanabe, K. Yamataka, S. Kiyonari, S. Wamaki, **2005**, US 2005/54645 A1.
- [S8] A. H. Jadhav, H. Kim, *Tetrahedron Lett.* **2012**, *53*, 5338–5342.
- [S9] C. S. Yeung, R. E. Ziegler, J. A. Porco, E. N. Jacobsen, *J. Am. Chem. Soc.* **2014**, *136*, 13614–13617.
- [S10] G. Bianchi, C. De Micheli, R. Gandolfi, P. Grünanger, P. V. Finzi, O. V. de Pava, *J. Chem. Soc., Perkin Trans. 1* **1973**, 1148–1155.
- [S11] V. Bavetsias, R. M. Lanigan, G. F. Ruda, B. Atrash, M. G. McLaughlin, A. Tumber, N. Y. Mok, Y.-V. Le Bihan, S. Dempster, K. J. Boxall, F. Jeganathan, S. B. Hatch, P. Savitsky, S. Velupillai, T. Krojer, K. S. England, J. Sejberg, C. Thai, A. Donovan, A. Pal, G. Scozzafava, J. M. Bennett, A.

Kawamura, C. Johansson, A. Szykowska, C. Gileadi, N. A. Burgess-Brown, F. von Delft, U. Oppermann, Z. Walters, J. Shipley, F. I. Raynaud, S. M. Westaway, R. K. Prinjha, O. Fedorov, R. Burke, C. J. Schofield, I. M. Westwood, C. Bountra, S. Müller, R. L. M. van Montfort, P. E. Brennan, J. Blagg, *J. Med. Chem.* **2016**, *59*, 1388–1409.

[S12] P. Filippakopoulos, S. Picaud, M. Mangos, T. Keates, J.-P. Lambert, D. Barsyte-Lovejoy, I. Felletar, R. Volkmer, S. Müller, T. Pawson, A.-C. Gingras, C. H. Arrowsmith, S. Knapp, *Cell* **2012**, *149*, 214–31.

[S13] P. M. Collins, J. T. Ng, R. Talon, K. Nekrosiute, T. Krojer, A. Douangamath, J. Brandao-Neto, N. Wright, N. M. Pearce, F. von Delft, *Acta Crystallogr. Sect. D Struct. Biol.* **2017**, *73*, 246–255.

[S14] M. Wojdyr, R. Keegan, G. Winter, A. Ashton, *Acta Crystallogr. Sect. A Found. Crystallogr.* **2013**, *69*, s299–s299.

[S15] T. Krojer, R. Talon, N. Pearce, P. Collins, A. Douangamath, J. Brandao-Neto, A. Dias, B. Marsden, F. von Delft, *Acta Crystallogr. Sect. D Struct. Biol.* **2017**, *73*, 267–278.

[S16] Smart, O.S. *et al.* Grade, version 1.102 Mar 29 2015. Cambridge, United Kingdom, Global Phasing Ltd (2011).

[S17] N. Pearce, A. R. Bradley, P. Collins, T. Krojer, R. Nowak, R. Talon, B. D. Marsden, S. Kelm, J. Shi, C. Deane, F. von Delft, *bioRxiv* **2016**, DOI: 10.1101/073411.

[S18] P. Emsley, B. Lohkamp, W. G. Scott, K. Cowtan, *Acta Crystallogr. Sect. D Biol. Crystallogr.* **2010**, *66*, 486–501.

[S19] G. N. Murshudov, P. Skubák, A. A. Lebedev, N. S. Pannu, R. A. Steiner, R. A. Nicholls, M. D. Winn, F. Long, A. A. Vagin, *Acta Crystallogr. Sect. D Biol. Crystallogr.* **2011**, *67*, 355–367.

[17b] Y. Wang, J.-Y. Wach, P. Sheehan, C. Zhong, C. Zhan, R. Harris, S. C. Almo, J. Bishop, S. J. Haggarty, A. Ramek, K. N. Berry, C. O’Herin, A. N. Koehler, A. W. Hung, D. W. Young, *ACS Med. Chem. Lett.* **2016**, *7*, 852–856.

- [21b] S. Renner, W. A. L. van Otterlo, M. Dominguez Seoane, S. Möcklinghoff, B. Hofmann, S. Wetzell, A. Schuffenhauer, P. Ertl, T. I. Oprea, D. Steinhilber, L. Brunsveld, D. Rauh, H. Waldmann, *Nat. Chem. Biol.* **2009**, *5*, 585–592.
- [25] P. Bamborough, C. Chung, E. H. Demont, R. C. Furze, A. J. Bannister, K. H. Che, H. Diallo, C. Douault, P. Grandi, T. Kouzarides, A.-M. Michon, D. J. Mitchell, R. K. Prinjha, C. Rau, S. Robson, R. J. Sheppard, R. Upton, R. J. Watson, *Angew. Chemie Int. Ed.* **2016**, *55*, 11382–11386.
- [26] M. Korczynska, D. D. Le, N. Younger, E. Gregori-Puigjané, A. Tumber, T. Krojer, S. Velupillai, C. Gileadi, R. P. Nowak, E. Iwasa, S. B. Pollock, I. Ortiz Torres, U. Oppermann, B. K. Shoichet, D. G. Fujimori, *J. Med. Chem.* **2016**, *59*, 1580–1598.
- [27] N. Igoe, E. D. Bayle, O. Fedorov, C. Tallant, P. Savitsky, C. Rogers, D. R. Owen, G. Deb, T. C. P. Somerville, D. M. Andrews, N. Jones, A. Cheasty, H. Ryder, P. E. Brennan, S. Müller, S. Knapp, P. V. Fish, *J. Med. Chem.* **2017**, *60*, 668–680.
- [31a] V. Bavetsias, R. M. Lanigan, G. F. Ruda, B. Atrash, M. G. McLaughlin, A. Tumber, N. Y. Mok, Y.-V. Le Bihan, S. Dempster, K. J. Boxall, F. Jeganathan, S. B. Hatch, P. Savitsky, S. Velupillai, T. Krojer, K. S. England, J. Sejberg, C. Thai, A. Donovan, A. Pal, G. Scozzafava, J. M. Bennett, A. Kawamura, C. Johansson, A. Szykowska, C. Gileadi, N. A. Burgess-Brown, F. von Delft, U. Oppermann, Z. Walters, J. Shipley, F. I. Raynaud, S. M. Westaway, R. K. Prinjha, O. Fedorov, R. Burke, C. J. Schofield, I. M. Westwood, C. Bountra, S. Müller, R. L. M. van Montfort, P. E. Brennan, J. Blagg, *J. Med. Chem.* **2016**, *59*, 1388–1409.
- [31b] S. M. Westaway, A. G. S. Preston, M. D. Barker, F. Brown, J. A. Brown, M. Campbell, C. Chung, H. Diallo, C. Douault, G. Drewes, R. Eagle, L. Gordon, C. Haslam, T. G. Hayhow, P. G. Humphreys, G. Joberty, R. Katso, L. Kruidenier, M. Leveridge, J. Liddle, J. Mosley, M. Muelbaier, R. Randle, I. Rioja, A. Rueger, G. A. Seal, R. J. Sheppard, O. Singh, J. Taylor, P. Thomas, D. Thomson, D. M. Wilson, K. Lee, R. K. Prinjha, *J. Med. Chem.* **2016**, *59*, 1357–1369.
- [32a] E. H. Demont, C. Chung, R. C. Furze, P. Grandi, A.-M. Michon, C. Wellaway, N. Barrett, A. M. Bridges, P. D. Craggs, H. Diallo, D. P. Dixon, C. Douault, A. J. Emmons, E. J. Jones, B. V. Karamshi, K. Locke, D. J. Mitchell, B. H. Mouzon, R. K. Prinjha, A. D. Roberts, R. J. Sheppard, R. J. Watson, P. Bamborough, *J. Med. Chem.* **2015**, *58*, 5649–5673.

[32b] G. Poncet-Montange, Y. Zhan, J. P. Bardenhagen, A. Petrocchi, E. Leo, X. Shi, G. R. Lee, P. G. Leonard, M. K. Geck Do, M. G. Cardozo, J. N. Andersen, W. S. Palmer, P. Jones, J. E. Ladbury, *Biochem. J.* **2015**, 466.

[32c] P. Bamborough, C. Chung, E. H. Demont, R. C. Furze, A. J. Bannister, K. H. Che, H. Diallo, C. Douault, P. Grandi, T. Kouzarides, A.-M. Michon, D. J. Mitchell, R. K. Prinjha, C. Rau, S. Robson, R. J. Sheppard, R. Upton, R. J. Watson, *Angew. Chemie Int. Ed.* **2016**, 55, 11382–11386.

[34] A. D. Morley, A. Pugliese, K. Birchall, J. Bower, P. Brennan, N. Brown, T. Chapman, M. Drysdale, I. H. Gilbert, S. Hoelder, A. Jordan, S. V. Ley, A. Merritt, D. Miller, M. E. Swarbrick, P. G. Wyatt, *Drug Discov. Today* **2013**, 18, 1221–1227.
